# Supplementary material for: Bone morphogenetic protein 7 promotes resistance to immunotherapy
Source: PubMed Central journal article supplement (PMC7519103; doi:10.1038/s41467-020-18617-z), 2020-09-24
Supplement: 41467_2020_18617_MOESM1_ESM.pdf [file 41467_2020_18617_MOESM1_ESM.pdf]

**Supplementary information**

**Bone morphogenetic protein 7 promotes resistance to immunotherapy**

Cortez, MA *et al*

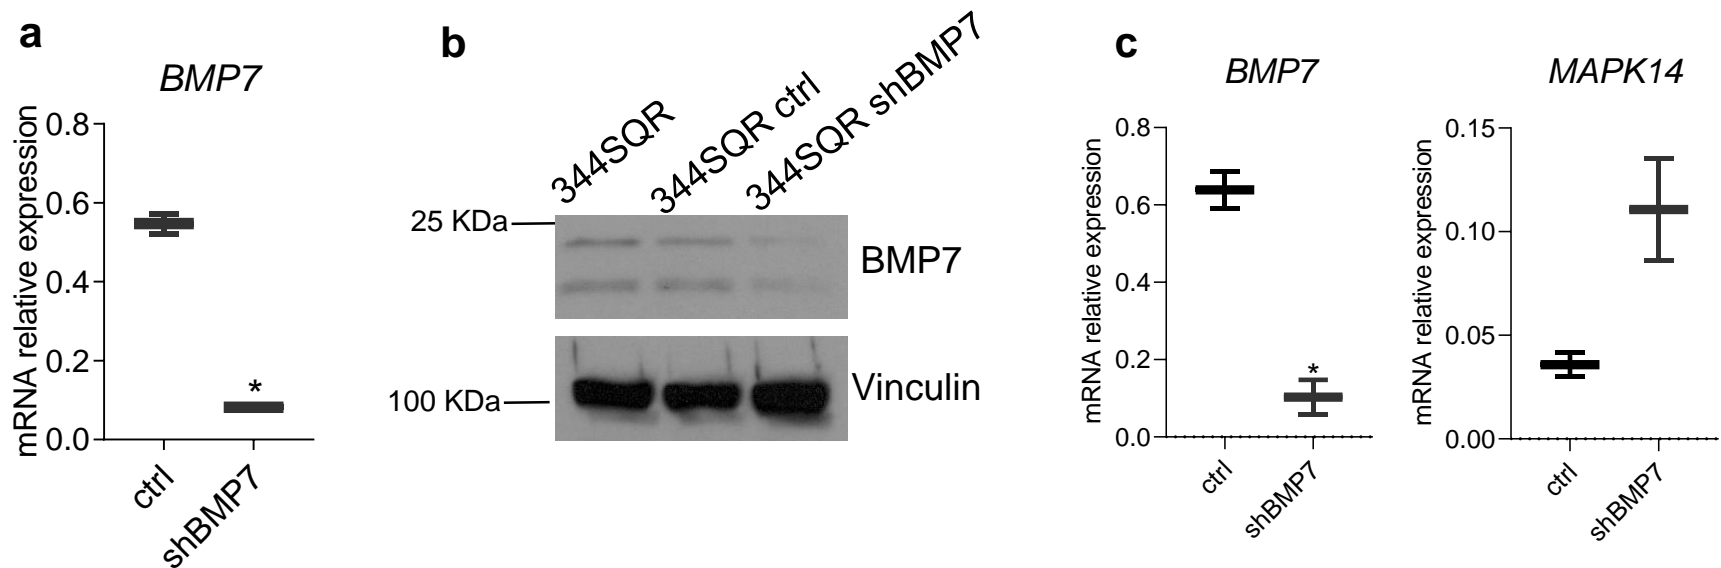

**Supplementary Figure 1. a,b** Establishment of 344SQR stable cell lines overexpressing shRNAs against *BMP7* (shBMP7) validated by quantitative PCR and western blotting. *ACTB* expression was used as a housekeeping gene for quantitative PCR. The comparative Ct method was used to calculate the relative abundance of mRNAs compared with *ACTB* expression. Box-and-whisker plots show the minimum and maximum from 2 biologically independent samples. *BMP7*, \* $p = 0.0296$  (ctrl vs. shBMP7) unpaired, two-sided t tests. *BMP7* mature form was detected by western blotting IN 344SQR, 344SQR control (non-targeting shRNA), and 344SQR shBMP7. Vinculin expression was used for normalization in western blotting. This experiment was repeated 2 times. **c**, *BMP7*-knockdown or –control cells ( $0.5 \times 10^6$ ) were injected into 129Sv/Ev mice and ctrl and shBMP7 tumors ( $n = 2$  biologically independent samples for each cohort) were collected for *BMP7* and *MAPK14* expression analysis by quantitative PCR. *ACTB* expression was used as a housekeeping gene for quantitative PCR. The comparative Ct method was used to calculate the relative abundance of mRNAs compared with *ACTB* expression. Box-and-whisker plots show the minimum and maximum. *BMP7*, \* $p = 0.0296$  (ctrl vs. shBMP7) unpaired, two-sided t tests.

## Supplementary Figure 2

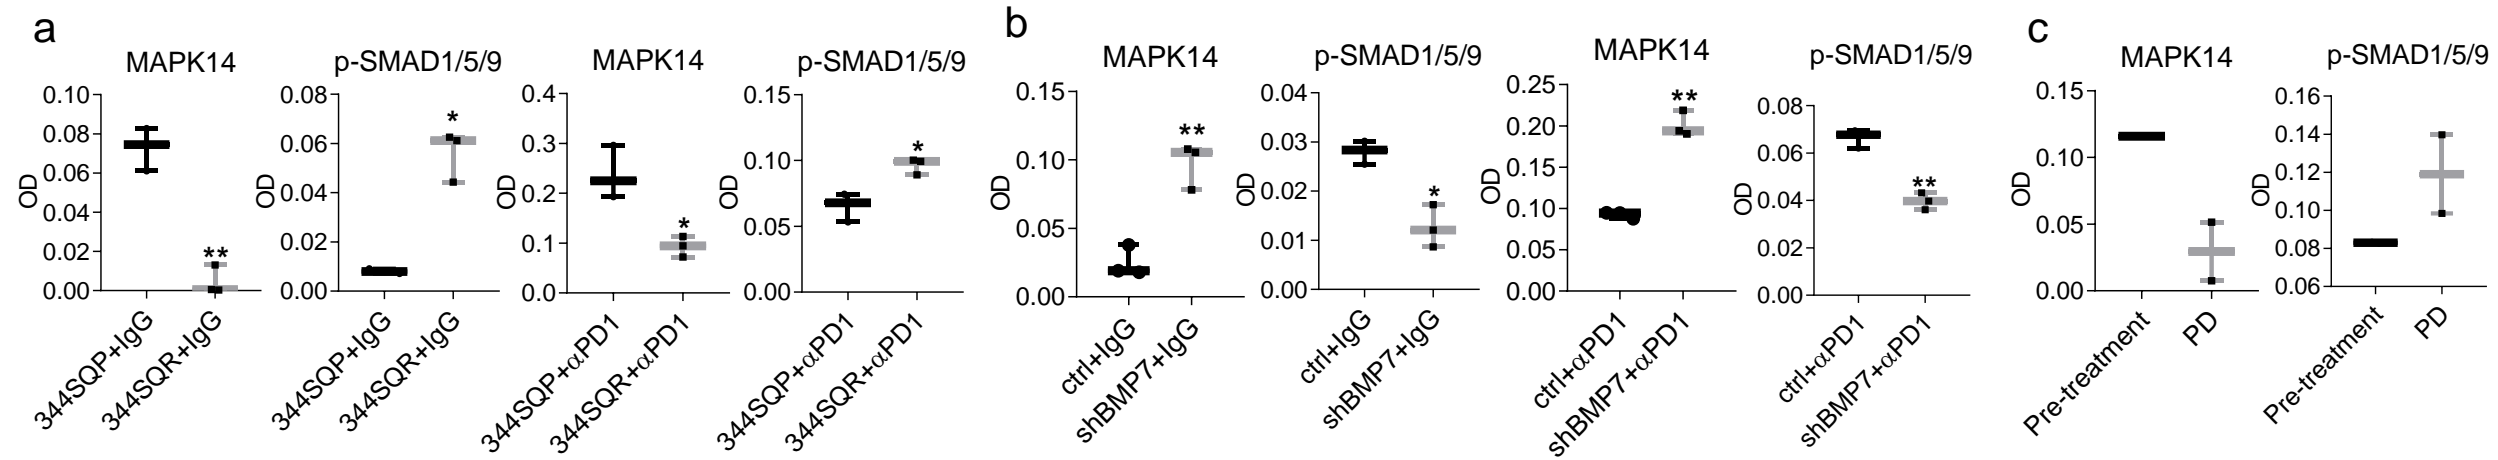

**Supplementary Figure 2.** Quantification of immunohistochemical stains for MAPK14, SMAD1/5/9 phosphorylation, and SMAD1 in formalin-fixed paraffin-embedded tissue sections using Fiji software. Optical Density (OD) numbers were obtained with the following formula:  $OD = \log(\text{max intensity}/\text{Mean intensity})$ , where max intensity = 255 for 8-bit images. **a**, Quantification of immunohistochemical stains for MAPK14 and p-SMAD1/5/9 expression from 344SQP and 344SQR tumors treated with IgG or anti-PD1 ( $n = 3$  biologically independent samples). MAPK14,  $**p = 0.0015$ , p-SMAD1/5/9,  $*p = 0.0140$  (344SQP vs. 344SQR plus IgG) unpaired, two-sided t tests. MAPK14,  $*p = 0.0284$ , p-SMAD1/5/9,  $*p = 0.0203$  (344SQP vs. 344SQR plus PD1) unpaired, two-sided t tests. Box-and-whisker plots show the minimum and maximum. Statistical significance was defined as \*,  $P < 0.05$ , \*\*,  $P < 0.01$ , \*\*\*,  $P < 0.001$ , and \*\*\*\*,  $P < 0.0001$ . **b**, Quantification of immunohistochemical stains for MAPK14 and p-SMAD1/5/9 expression from 344SQR ctrl and 344SQR BMP7 knockdown tumors treated with IgG or anti-PD1 ( $n = 3$  biologically independent samples). Box-and-whisker plots show the minimum and maximum. MAPK14,  $**p = 0.0051$ , p-SMAD1/5/9,  $*p = 0.0116$  (ctrl vs. shBMP7 plus IgG) unpaired, two-sided t tests. MAPK14,  $**p = 0.0045$ , p-SMAD1/5/9,  $**p = 0.0010$  (ctrl vs. shBMP7 plus PD1) unpaired, two-sided t tests. **c**, Quantification of immunohistochemical stains for MAPK14 and p-SMAD1/5/9 expression from patients that progressed (PD) on anti-PD1 or anti-CTLA-4 compared to pre-treatment biopsies ( $n = 2$  biologically independent samples). Box-and-whisker plots show the minimum and maximum.

# Supplementary Figure 3

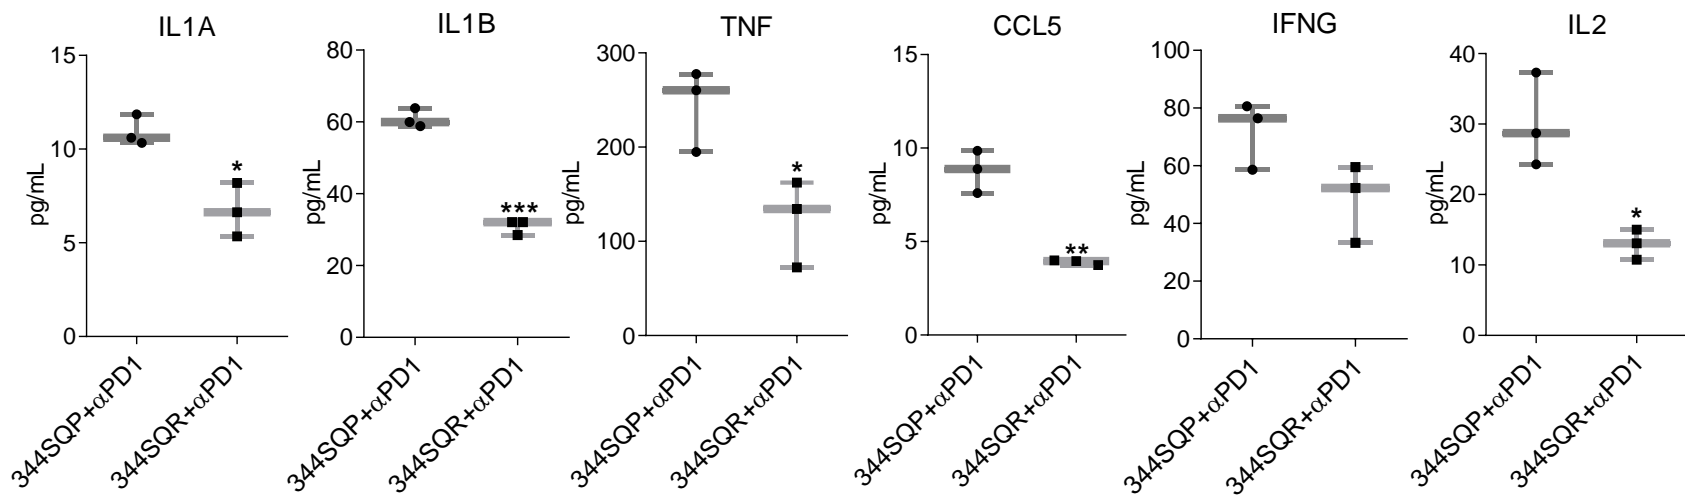

**Supplementary Figure 3.** Multiplex enzyme-linked immunosorbent assay for cytokines and chemokines in serum samples from mice bearing 344SQR ( $n = 3$  biologically independent samples) or 344SQP tumors ( $n = 3$  biologically independent samples) treated with anti-PD1 twice per week for a total of 4 doses. Box-and-whisker plots show the minimum and maximum. P values are from unpaired, two-sided t tests. Statistical significance was defined as \*,  $P < 0.05$ , \*\*,  $P < 0.01$ , \*\*\* $P < 0.001$ , and \*\*\*\*,  $P < 0.0001$ .

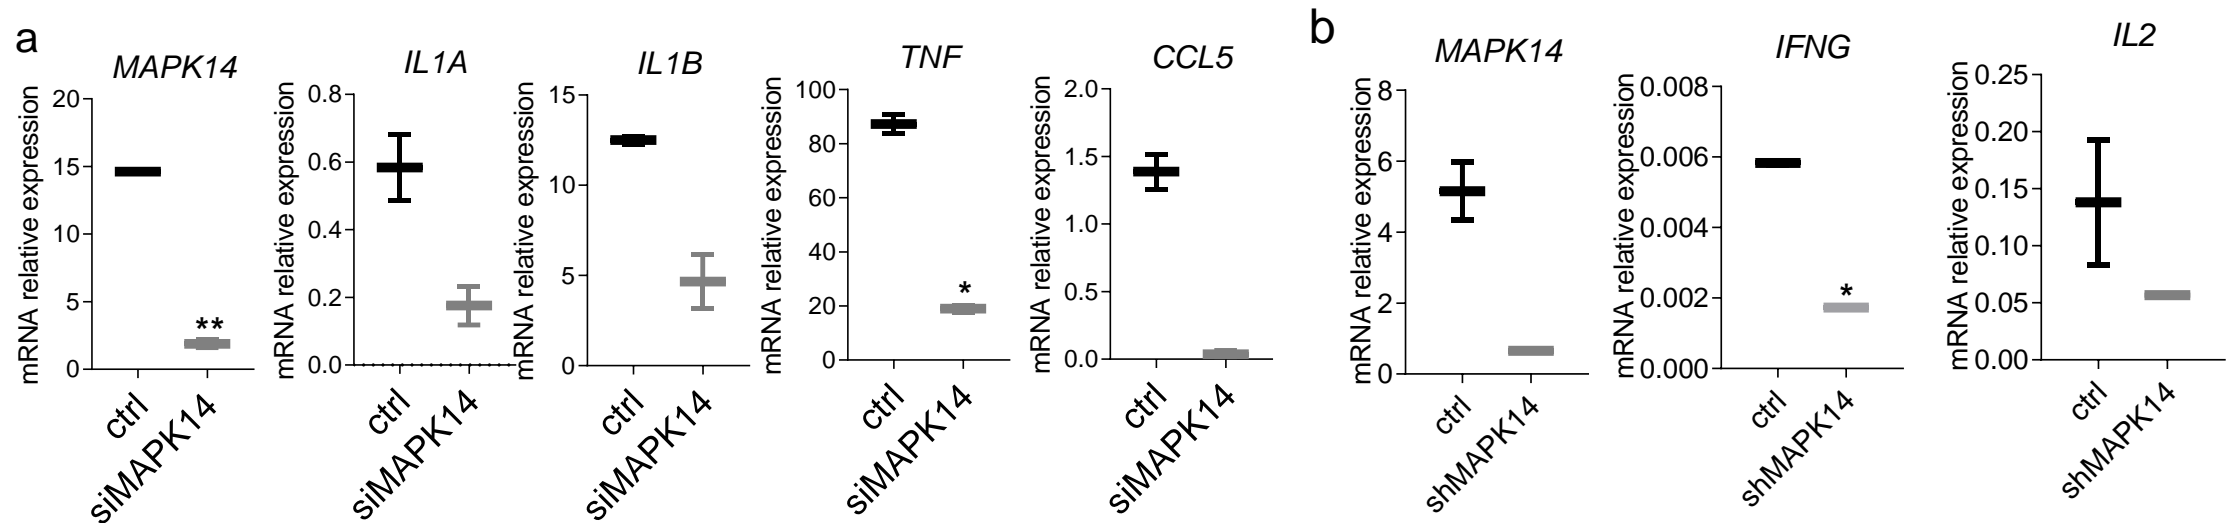

**Supplementary Figure 4.** **a**, Analysis of *MAPK14*, *IL1A*, *IL1B*, *TNF*, and *CCL5* expression in RAW 264.7 cells transfected with siRNAs ctrl and siMAPK14 (100  $\mu$ M) targeting MAPK14 for 24 or 48 hours using quantitative PCR. Box-and-whisker plots show the minimum and maximum values from 2 independent experiments. **b**, Analysis of *MAPK14*, *IFNG* and *IL2* expression in EL4 cells stably overexpressing shRNAs targeting MAPK14 (EL4 shMAPK14) compared with control (EL4 ctrl) cells using quantitative PCR. CD45 expression was used as normalizer control. The comparative Ct method was used to calculate the relative abundance of mRNAs compared with CD45 expression. Box-and-whisker plots show the minimum and maximum values from 2 independent experiments. P values are from unpaired, two-sided t tests. Statistical significance was defined as \*,  $P < 0.05$ , \*\*,  $P < 0.01$ , \*\*\* $P < 0.001$ , and \*\*\*\*,  $P < 0.0001$ .

# Supplementary Figure 5

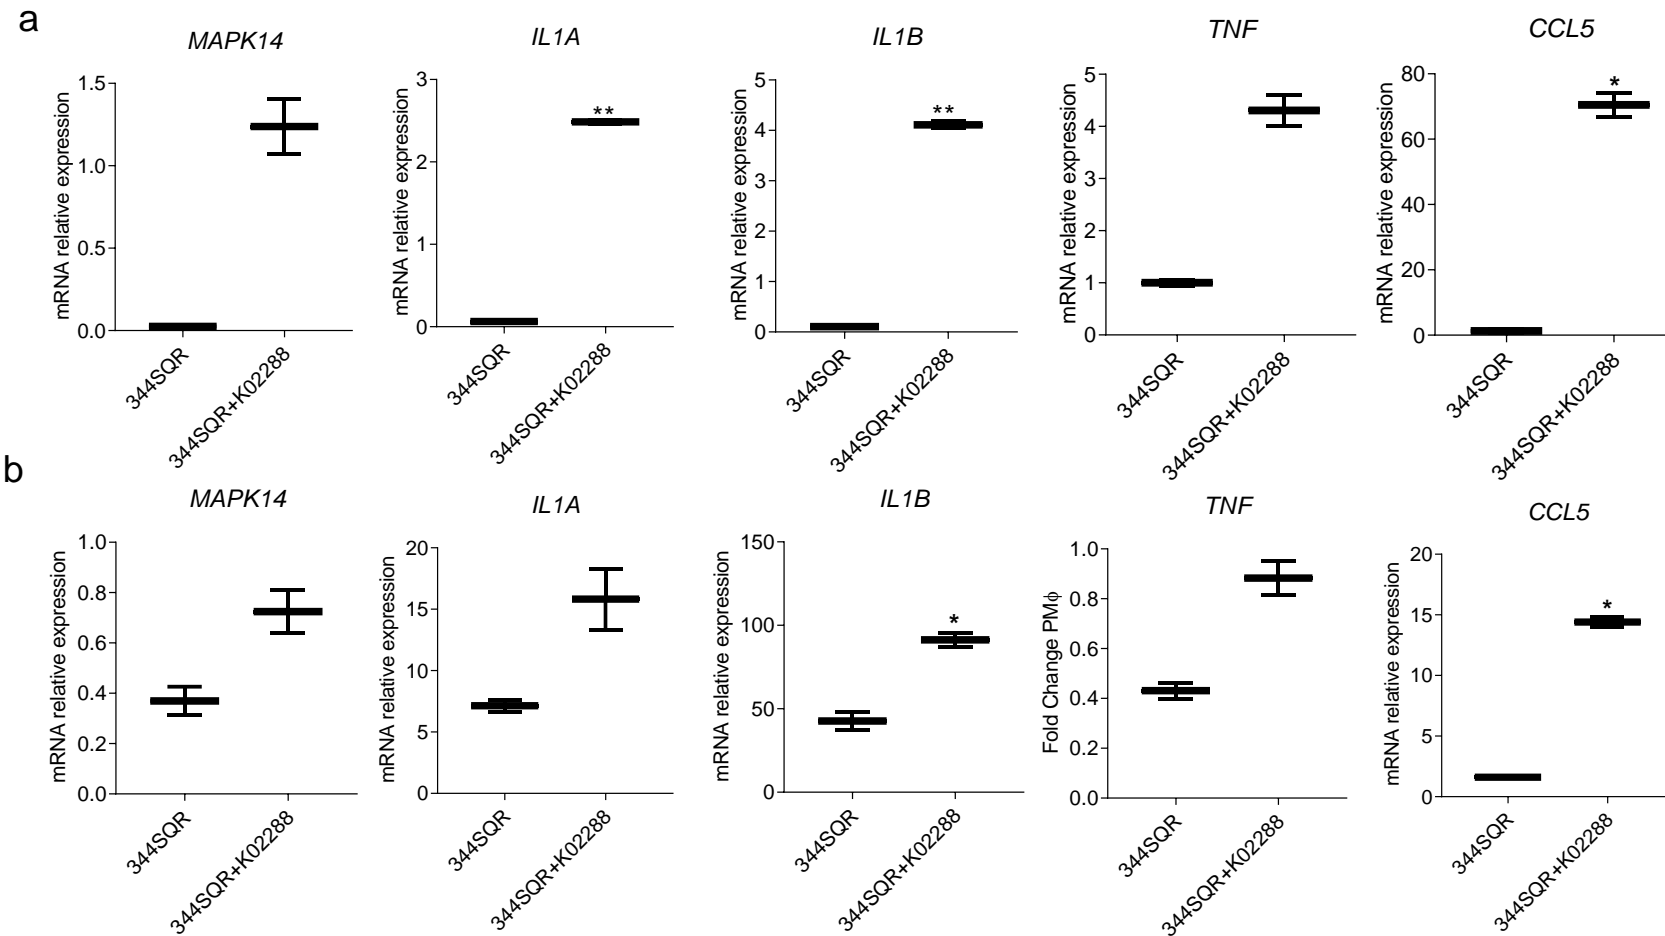

**Supplementary Figure 5. a,b** 344SQR cells were seeded at the top inserts, and RAW 264.7 cells (a) or peritoneal macrophages (b) were seeded at the bottom of the transwell system. Cells were then cultured in complete medium (RPMI-1640 supplemented with 100 units/mL penicillin, 100 µg/mL streptomycin, and 10% heat-inactivated fetal bovine serum) and incubated at 37°C in 5% CO<sub>2</sub> for 24 or 48 hours, after which cells were treated with K02288 (6.4 nM). *CD45* expression was used as a housekeeping gene for qPCR. The comparative Ct method was used to calculate the relative abundance of *MAPK14*, *IL1A*, *IL1B*, *TNF* and *CCL5* mRNAs compared with *CD45* expression. Box-and-whisker plots show the minimum and maximum values from 2 independent experiments. P values are from unpaired, two-sided t tests. Statistical significance was defined as \*, P<0.05, \*\*, P<0.01, \*\*\*P<0.001, and \*\*\*\*, P<0.0001.

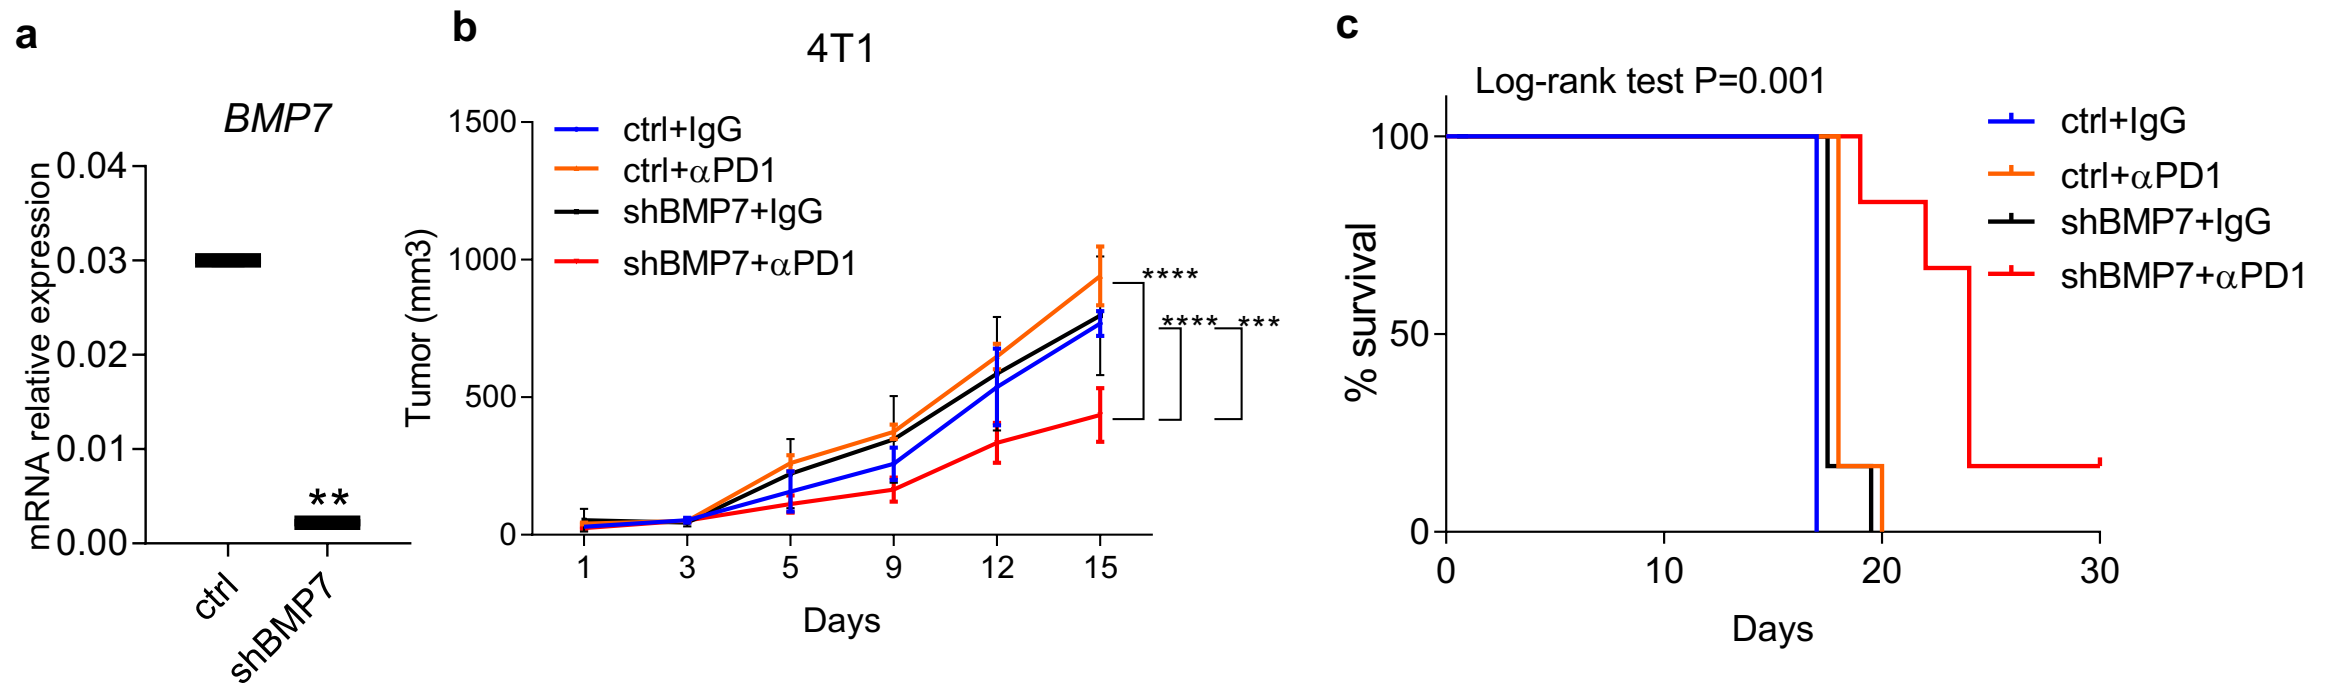

**Supplementary Figure 6.** **a**, Establishment of 4T1 stable cell lines overexpressing shRNAs against *BMP7* (shBMP7) validated by quantitative PCR. *ACTB* expression was used as a housekeeping gene for quantitative PCR. The comparative Ct method was used to calculate the relative abundance of mRNAs compared with *ACTB* expression. Box-and-whisker plots show the minimum and maximum values from 2 independent experiments. P values are from unpaired, two-sided t tests. **b,c**, Tumor growth and survival analysis of mice with 4T1 ctrl ( $n = 6$  animals) or 4T1-shBMP7 ( $n=6$  animals) tumors treated with IgG or anti-PD1 (10 mg/kg) twice a week for 3 weeks. ctrl+IgG vs. shBMP7+αPD1, \*\*\*\* $p < 0.0001$ , ctrl+ αPD1 vs. shBMP7+αPD1, \*\*\*\* $p < 0.0001$  shBMP7+IgG vs. shBMP7+αPD1, \*\*\* $p = 0.0002$ , Two-way RM ANOVA. Mouse survival rates were analyzed by the Kaplan–Meier method and compared with log-rank test. Statistical significance was defined as \*,  $P < 0.05$ , \*\*,  $P < 0.01$ , \*\*\* $P < 0.001$ , and \*\*\*\*,  $P < 0.0001$ .

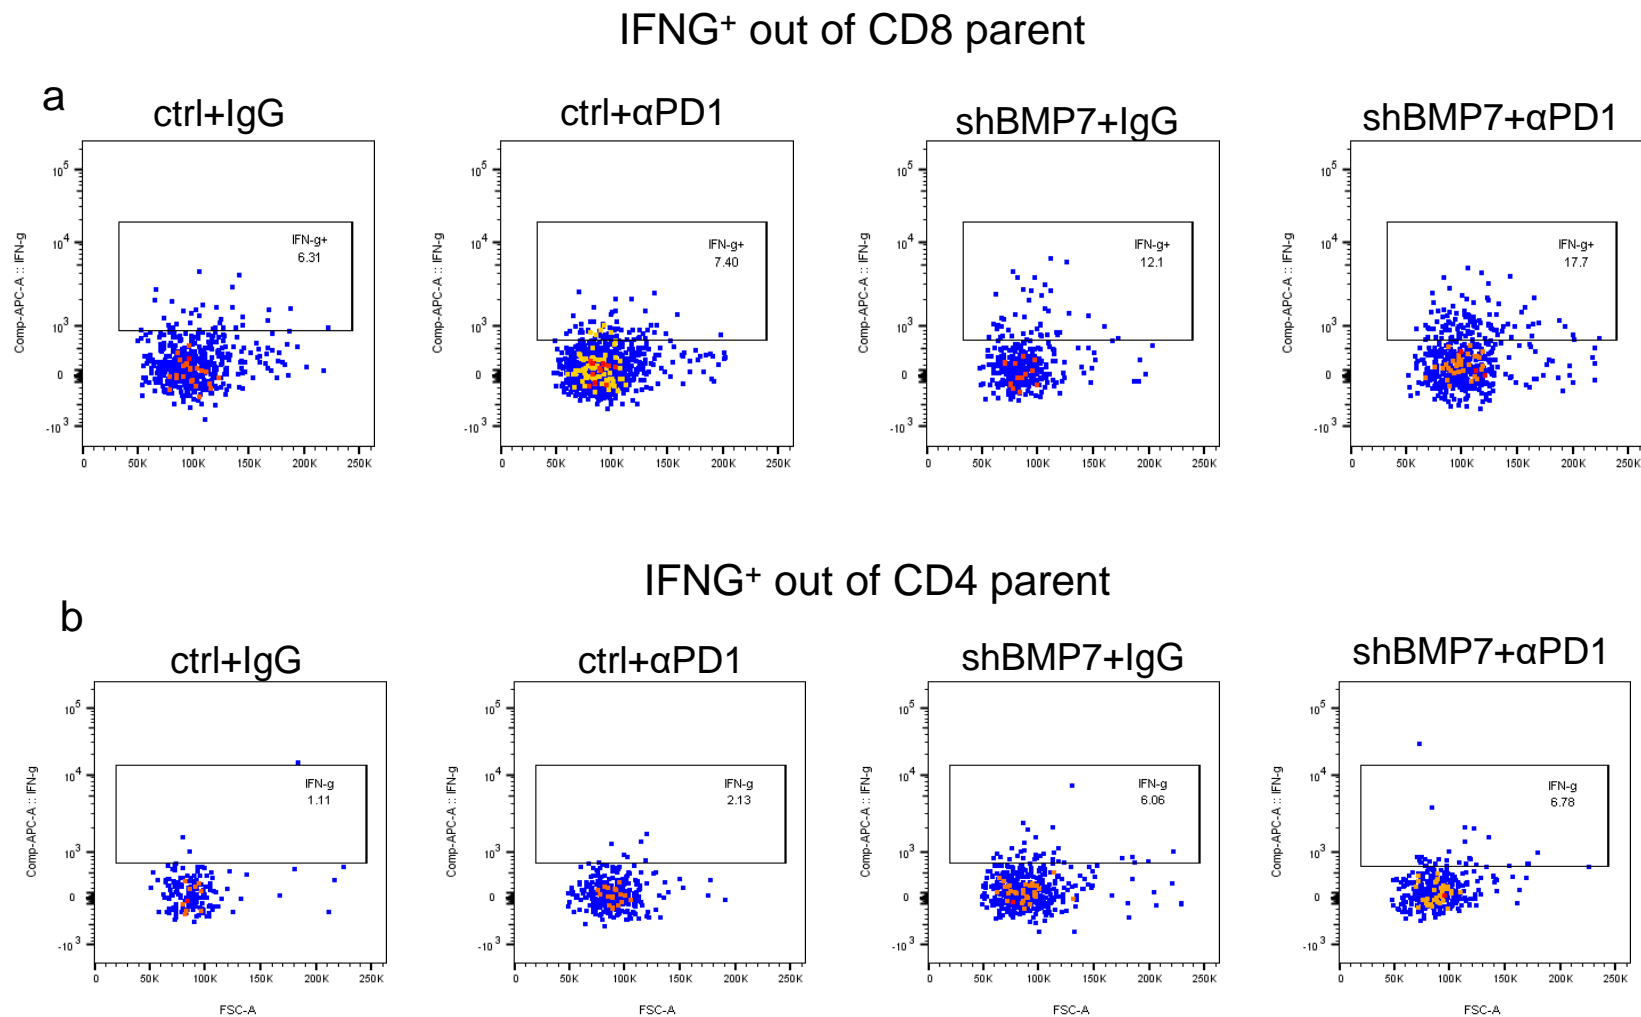

**Supplementary Figure 7. a**, Representative of Flow cytometry analysis of CD8<sup>+</sup>IFNG<sup>+</sup> out of the CD8<sup>+</sup> T cells parent in tumor-infiltrating leucocytes (TILs) from 344SQR ctrl ( $n = 3$  independent biological samples) and 344SQR-shBMP7 ( $n = 3$  independent biological samples) tumors treated with IgG or anti-PD1 (10 mg/kg) twice a week for 2 weeks. Cells were first gated on lymphocytes, then CD45<sup>+</sup>, then CD8<sup>+</sup> T cells, followed by IFNG<sup>+</sup> population. **b**, Representative of Flow cytometry analysis of CD4<sup>+</sup>IFNG<sup>+</sup> out of the CD4<sup>+</sup> T cells parent in TILs from 344SQR ctrl ( $n = 3$  independent biological samples) and 344SQR-shBMP7 ( $n = 3$  independent biological samples) tumors treated with IgG or anti-PD1 (10 mg/kg) twice a week for 2 weeks. Cells were first gated on Lymphocytes, then CD45<sup>+</sup>, then CD4<sup>+</sup> T cells, followed by IFNG<sup>+</sup> population.



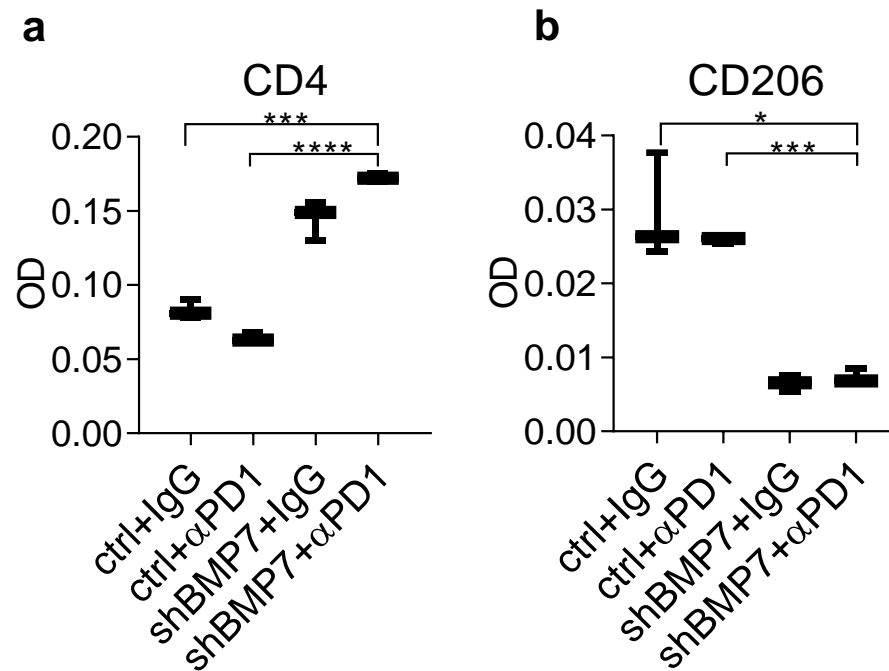

**Supplementary Figure 8.** Quantification of immunohistochemical stains for CD4 and CD206 in formalin-fixed paraffin-embedded tissue sections using Fiji software. Optical Density (OD) numbers were obtained with the following formula:  $OD = \log(\text{Max intensity}/\text{Mean intensity})$ , where max intensity = 255 for 8-bit images. **a**, Quantification of immunohistochemical stains for CD4 T cells from 344SQR ctrl and 344SQR BMP7 knockdown tumors treated with IgG or anti-PD1 ( $n = 3$  biologically independent samples).  $***p = 0.0004$  (ctrl + IgG vs. shBMP7+αPD1),  $****p < 0.0001$  (ctrl + αPD1 vs. shBMP7 + αPD1), unpaired, two-sided t tests. Box-and-whisker plots show the minimum and maximum. Statistical significance was defined as \*,  $P < 0.05$ , \*\*,  $P < 0.01$ ,  $***P < 0.001$ , and  $****$ ,  $P < 0.0001$ . **b**, Quantification of immunohistochemical stains for CD206 macrophages from 344SQR ctrl and 344SQR BMP7 knockdown tumors treated with IgG or anti-PD1 ( $n = 3$  biologically independent samples).  $*p = 0.0319$  (ctrl + IgG vs. shBMP7 + αPD1),  $***p = 0.0001$  (ctrl + αPD1 vs. shBMP7 + αPD1), unpaired, two-sided t tests. Box-and-whisker plots show the minimum and maximum. Statistical significance was defined as \*,  $P < 0.05$ , \*\*,  $P < 0.01$ ,  $***P < 0.001$ , and  $****$ ,  $P < 0.0001$ .

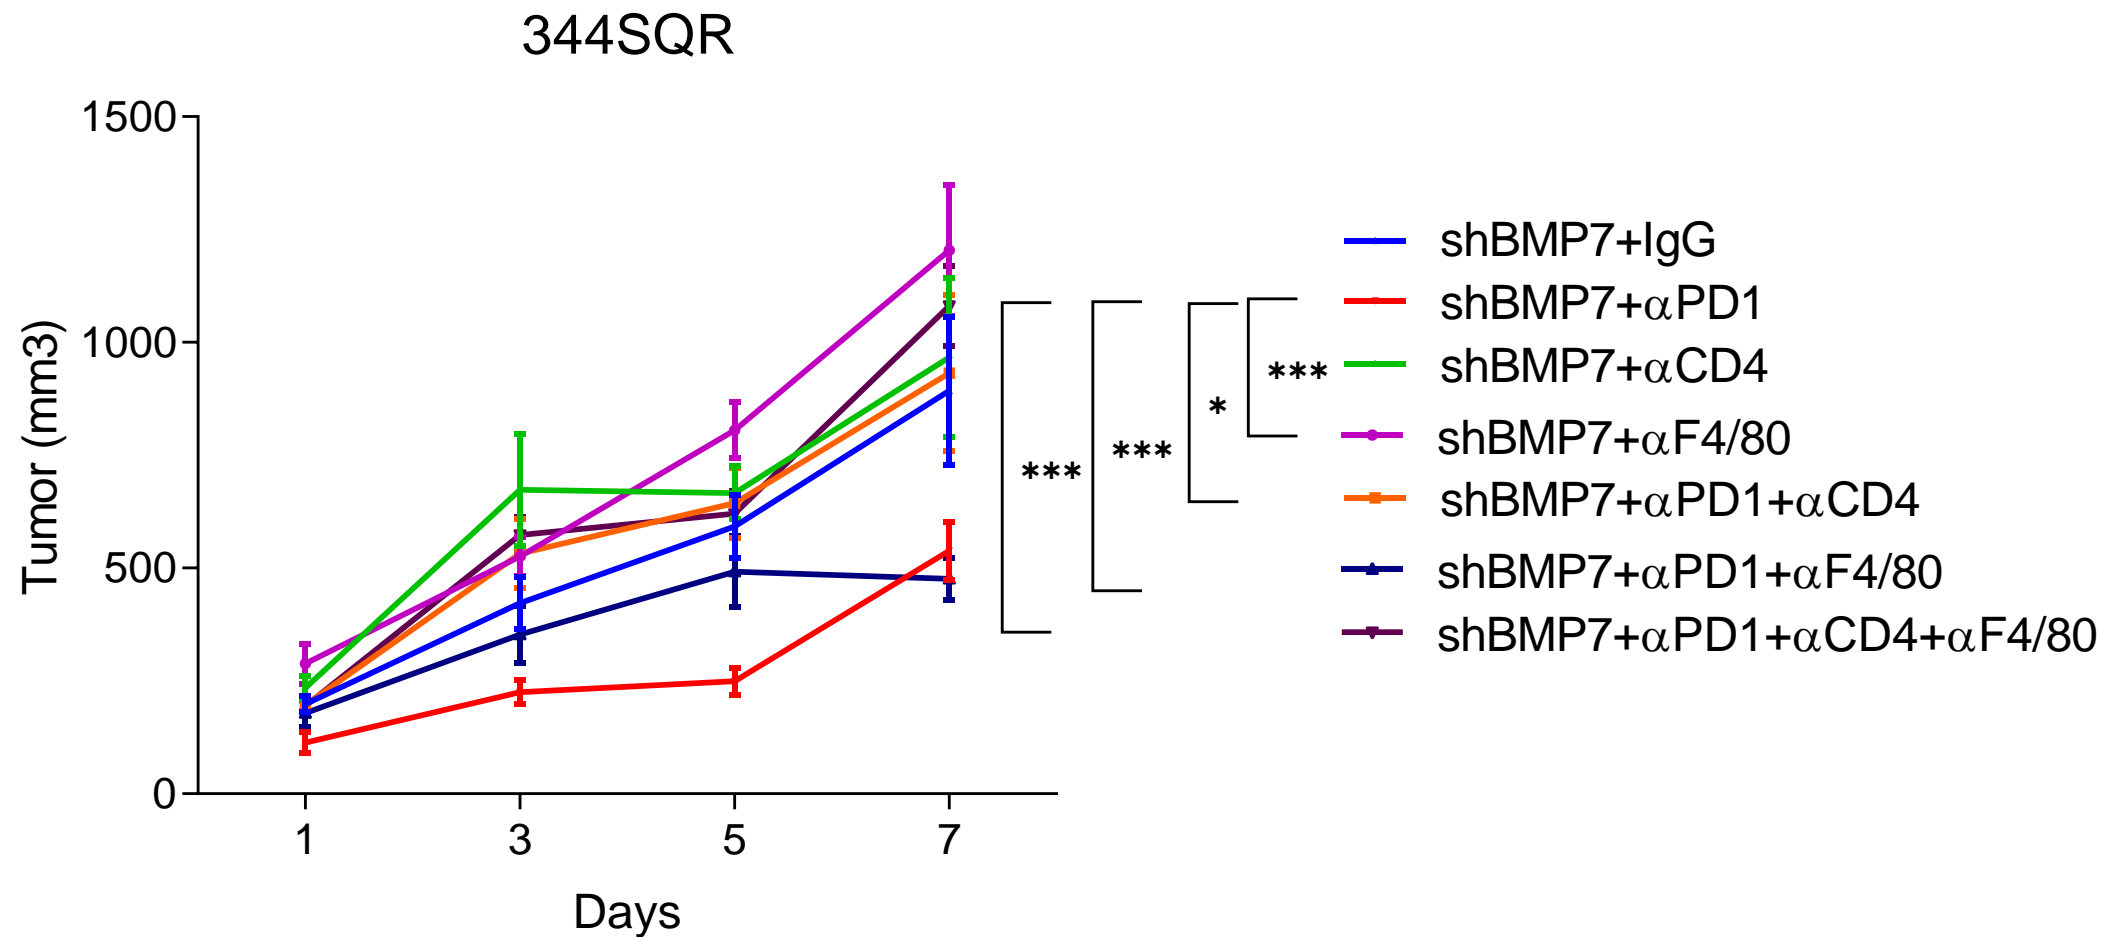

**Supplementary Figure 9.** Tumor growth and survival analysis of mice with 344SQR-shBMP7 ( $n = 4$  animals or  $n = 5$  animals) tumors treated with IgG, anti-PD1, anti-CD4 or anti-F4/80 (10 mg/kg) twice a week for 2 weeks. F4/80 (10 mg/kg) twice a week for 2 weeks. Tumor growth curves were compared Two-way RM ANOVA. Statistical significance was defined as \*,  $P < 0.05$ , \*\*,  $P < 0.01$ , \*\*\*,  $P < 0.001$ , and \*\*\*\*,  $P < 0.0001$ . shBMP7+αPD1 vs. shBMP7+αF4/80, \*\*\* $p = 0.0003$ , shBMP7+αPD1 vs. shBMP7+αPD1+αCD4, \* $p = 0.0282$ , shBMP7+αPD1 vs. shBMP7+αPD1+αF4/80, \*\*\* $p = 0.0002$ , shBMP7+αPD1 vs. shBMP7+αPD1+αCD4+αF4/80, \*\*\* $p = 0.0002$ .

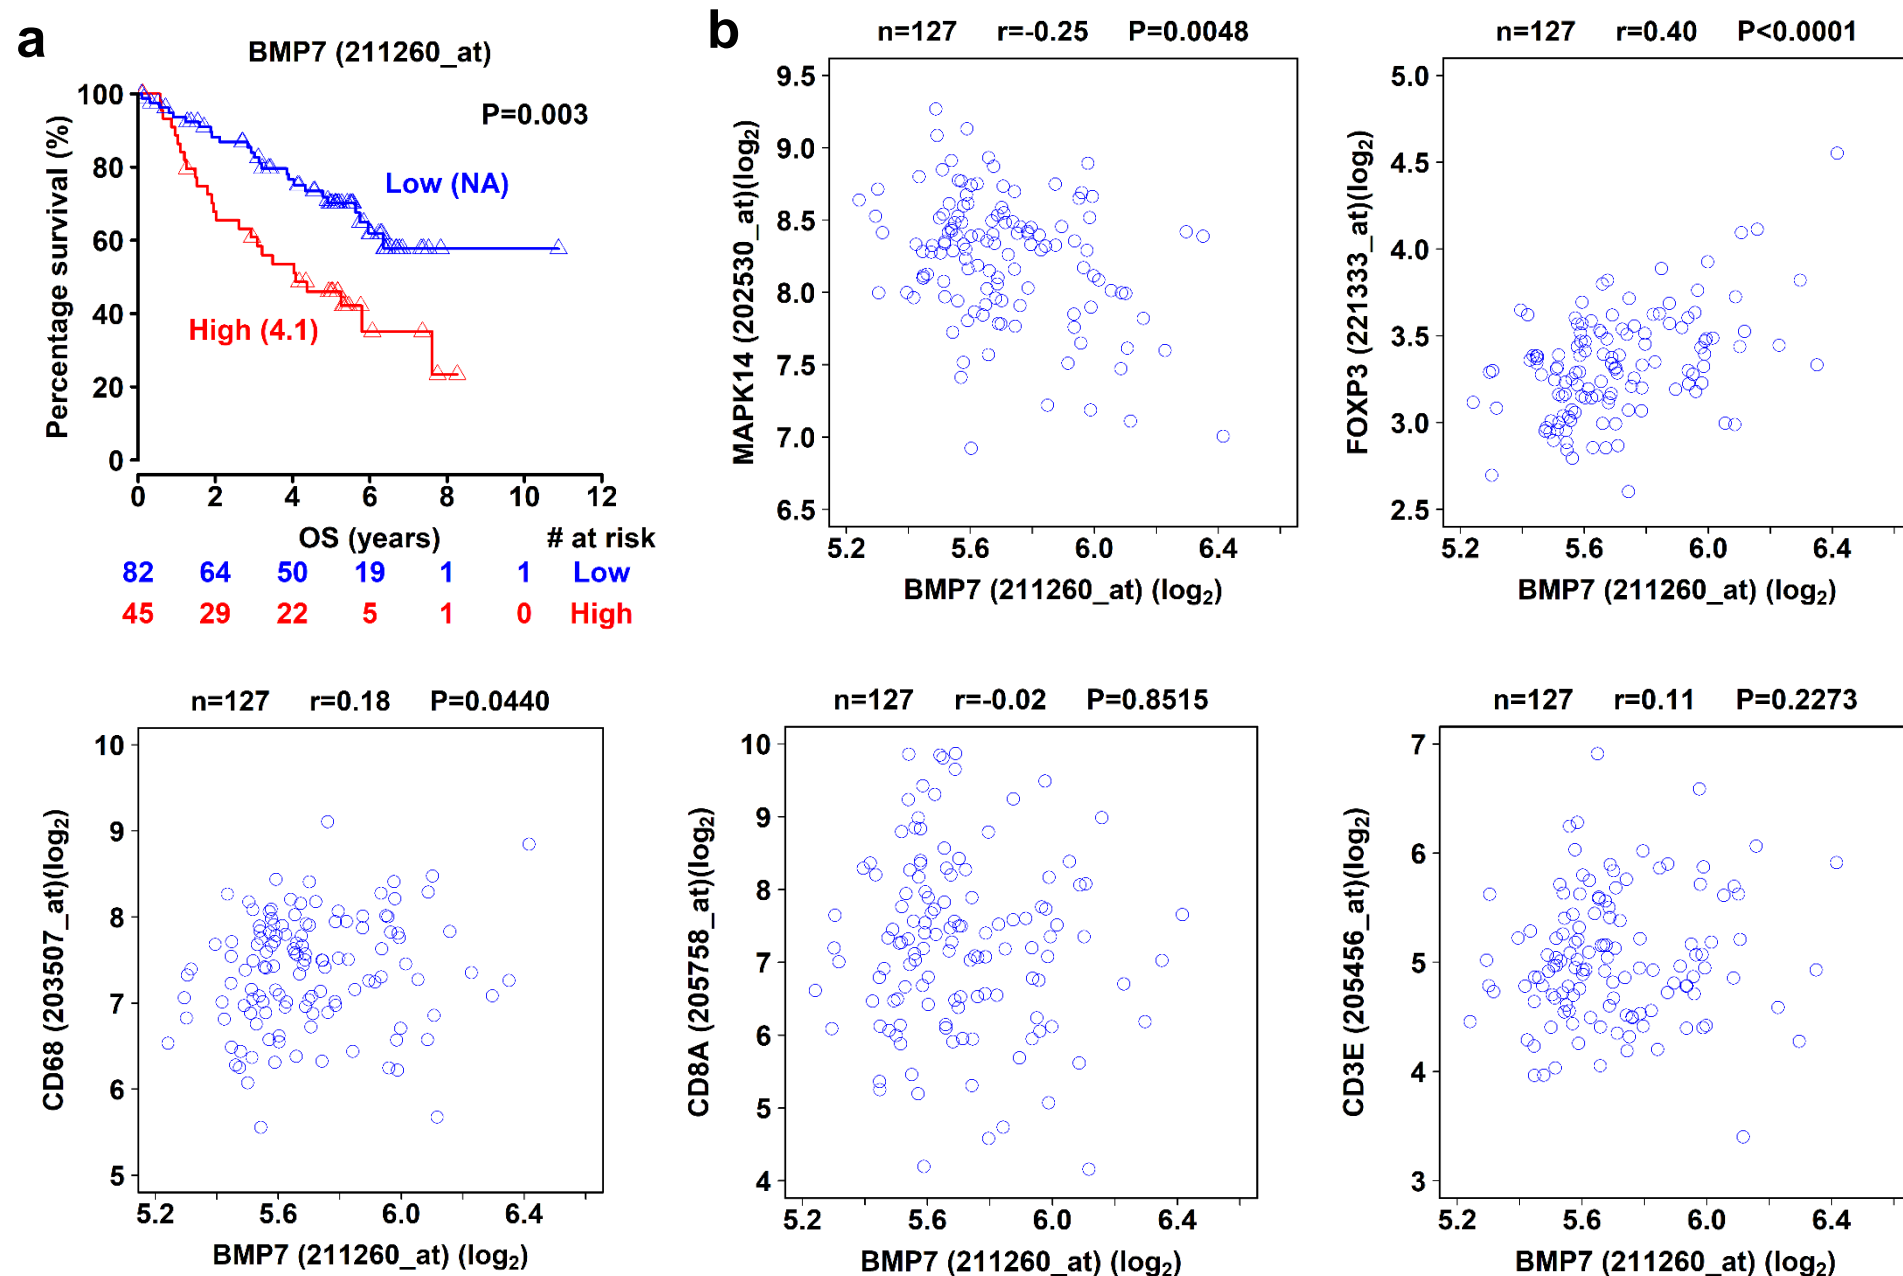

**Supplementary Figure 10.** **a**, *BMP7* is an independent marker of poor overall survival in NSCLC GSE9893 LUAD cohort. The Spearman's rank-order correlation test was applied to measure the strength of the association between different pairs of mRNA expression levels in tumor samples. P values were given by log-rank test, two-sided. **b**, Analysis of *MAPK14*, *FOXP3*, *CD68*, *CD8A*, *CD3E* correlation with *BMP7* expression in samples from GSE9893 LUAD cohort. Correlation analysis for mRNA data for TCGA Lung Adenocarcinoma cohort was performed in R (version 3.5.1; <http://www.r-project.org/>).

Supplementary Figure 11

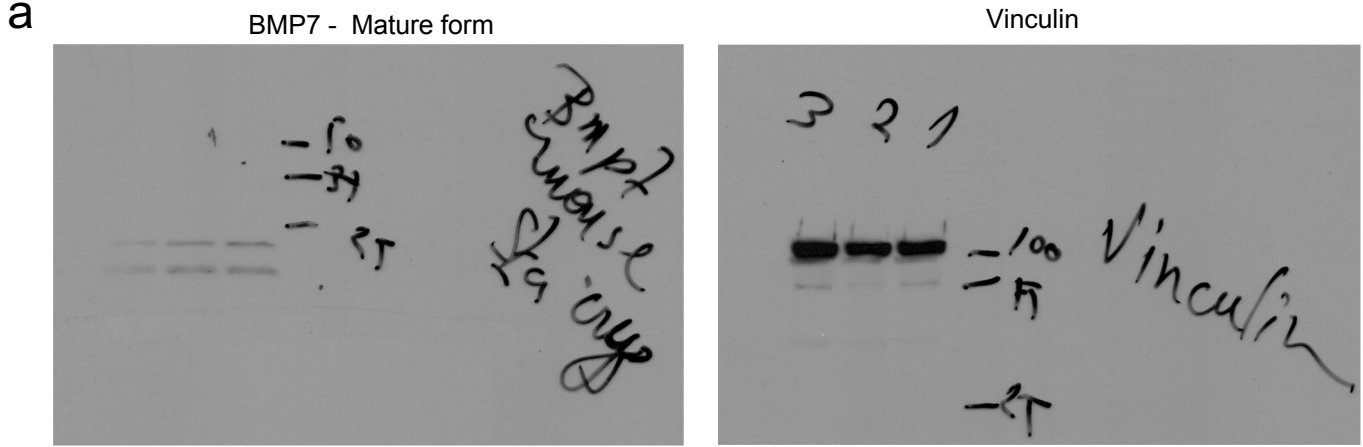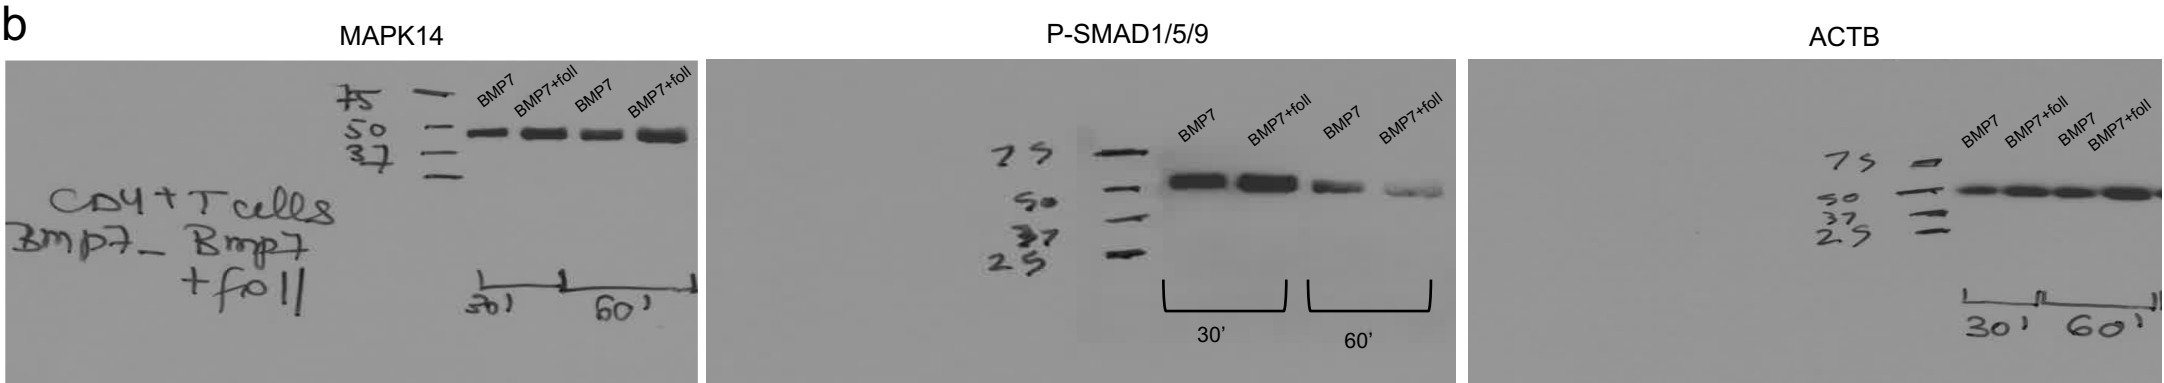

Supplementary Figure 11. Uncropped images of immunoblots from Supplementary Figure 1 (a) and Figure 4 (b).

# Supplementary Figure 12

## a Lymphoid gating strategy

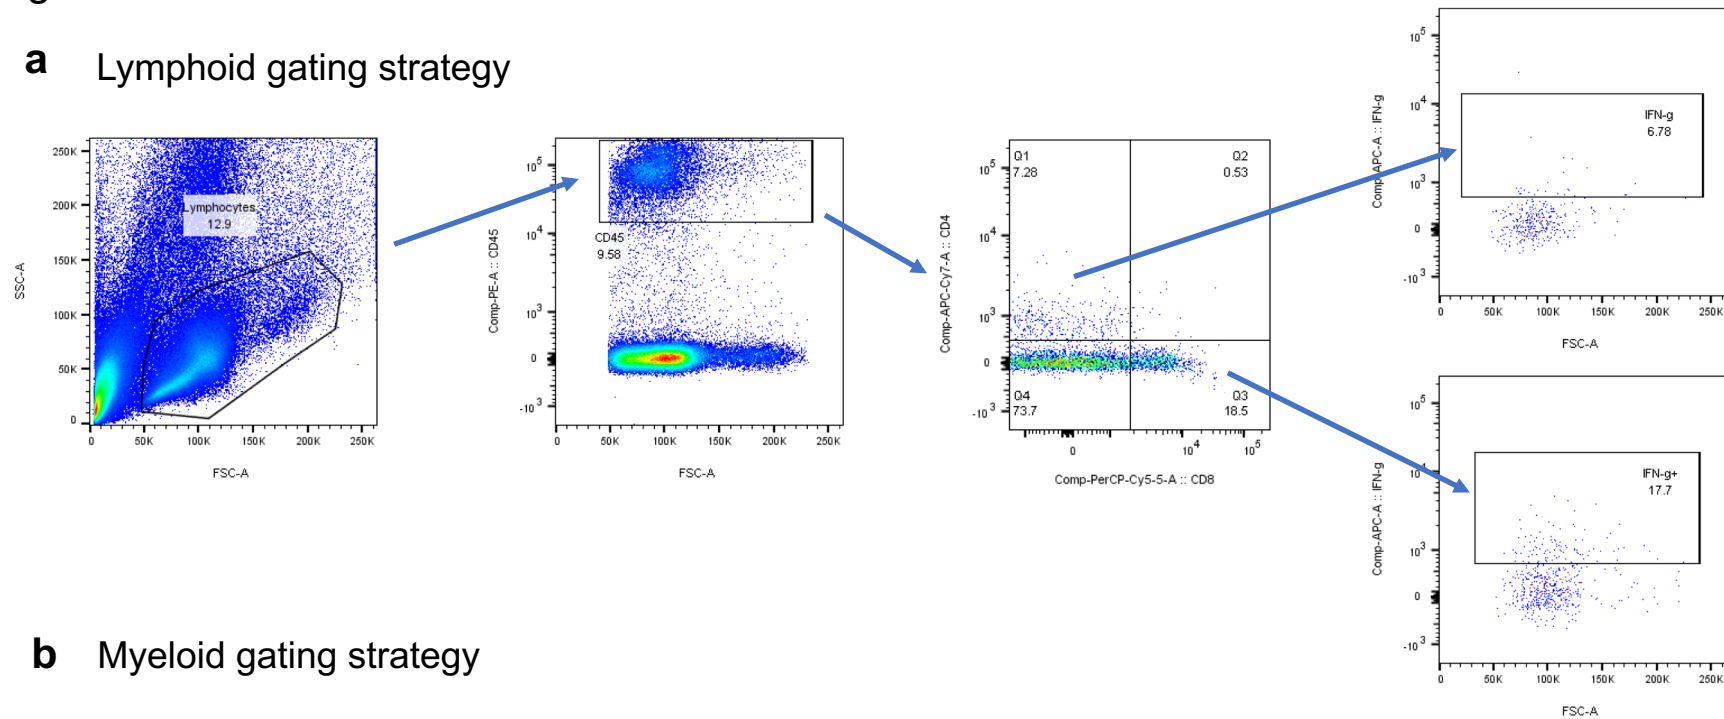

## b Myeloid gating strategy

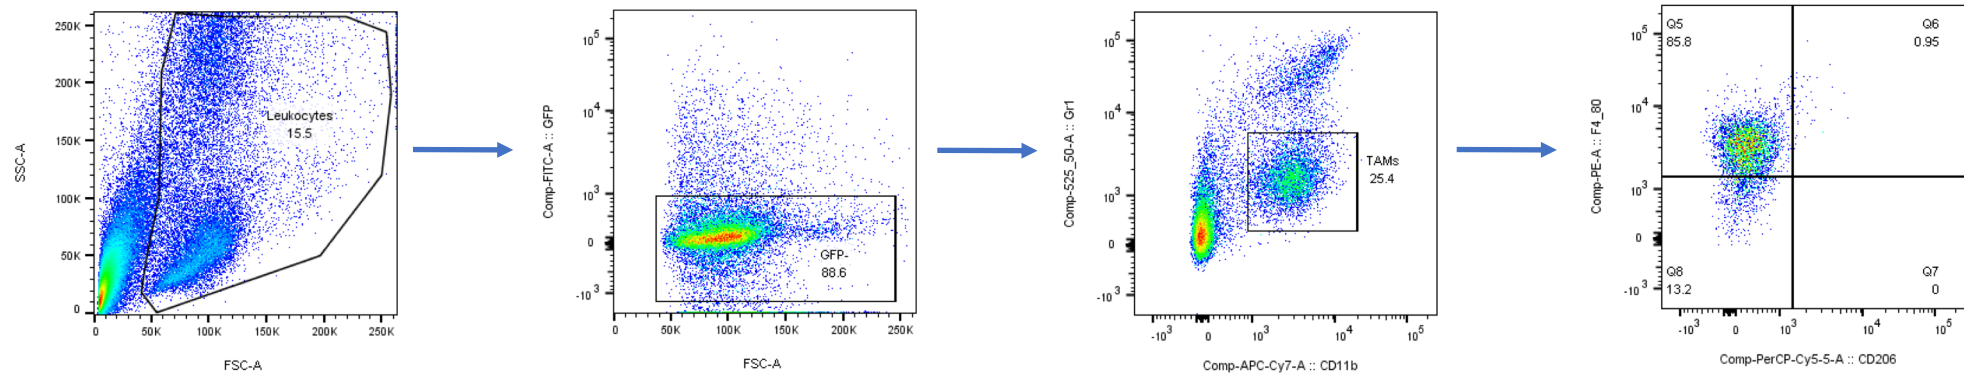

**Supplementary Figure 12. a**, Lymphoid population gating: Cells were gated on lymphocytes, then on CD45<sup>+</sup>, then on CD4 and CD8 T cells. IFNG was then gated on either CD4 parent population or CD8 parent population, and percentages were recorded accordingly. **b**, Myeloid population gating: Cells were first gated on total leukocytes, then on GFP-negative cells (since tumor cells were GFP-positive). Tumor associated macrophages (TAMs) were then gated on Gr1<sup>high</sup> CD11b intermediate population, followed by F4/80<sup>+</sup> and CD206<sup>+</sup> gating for M2 subpopulation.

**Supplementary Table 1.** Microarray data for BMP7 expression in 344SQP versus 344SQR tumors treated with anti-PD1. The analysis was performed in R using functions in LIMMA library. A linear model was fitted to each gene and empirical Bayes methods were used to obtain the statistics. Data analysis is two-sided.

| Gene.Symbol | Gene.Title                   | Representative.Public.ID | ENTREZ_GENE_ID | RefSeq.Transcript.ID | probe      | Average 344SQR | Average 344SQP | P.Value        | FDR         | FCH        |
|-------------|------------------------------|--------------------------|----------------|----------------------|------------|----------------|----------------|----------------|-------------|------------|
| Bmp7        | bone morphogenetic protein 7 | NM_007557                | 12162          | NM_007557            | 1418910_at | 6.643333333    | 3.17           | 0.000000026643 | 0.000122277 | 11.1065076 |

**Supplementary Table 2. Pyrosequencing methylation assay (PMA) primers and assay conditions**

| Primer Name | Primer Sequence       | PCR Size | Sequence to Analyze               |
|-------------|-----------------------|----------|-----------------------------------|
| Bmp7/F1     | ATTTGTAGGTTTGTAAAGTTG | 150bp    | TTTGTGTGY GTTTTGGYGA GTGYGGGTYG A |
| Bmp7/Rbio1  | CCCTATCCTTTACTCAATT   |          |                                   |
| Bmp7/S1     | GGAGTTGTTGTGTTAGT     |          |                                   |

| PCR Reaction            | Volume (uL) |
|-------------------------|-------------|
| Bisulfite DNA           | 2           |
| 2x Zymo Reaction Buffer | 7.5         |
| dNTP Mix (25mM each)    | 0.15        |
| F primer (10uM)         | 0.3         |
| R primer (10uM)         | 0.3         |
| Zymo Taq                | 0.12        |
| DW                      | 4.63        |

**Cycling conditions**

| Step | Temp (oC)                   | Duration |
|------|-----------------------------|----------|
| 1    | 95                          | 10 m     |
| 2    | 95                          | 30 s     |
| 3    | 55                          | 30s      |
| 4    | 72                          | 30s      |
| 5    | Repeat (steps 2-4) 45 times |          |
| 6    | 72                          | 7 m      |
| 7    | 12                          | infinite |

| <b>Supplementary Table 3. Reverse Phase Protein Array (RPPA) analysis in 344SQP versus 344SQR tumors treated with anti-PD1</b> |                 |                 |           |             |          |  |
|--------------------------------------------------------------------------------------------------------------------------------|-----------------|-----------------|-----------|-------------|----------|--|
| Name                                                                                                                           | 344SQR+anti-PD1 | 344SQP+anti-PD1 | FCH_Treat | P.Value     | FDR      |  |
| CDKN2A(p16INK4a)                                                                                                               | 0.518330427     | 1.483368476     | -1.95212  | 1.32139E-06 | 0.000321 |  |
| STAT3(Stat3_pY705)                                                                                                             | 0.868652785     | 1.137474558     | -1.20482  | 0.000548188 | 0.066605 |  |
| GZMB(Granzyme-B)                                                                                                               | 0.933295058     | 1.171671519     | -1.17966  | 0.012649596 | 0.229168 |  |
| GAB2(Gab2)                                                                                                                     | 0.875751417     | 1.109417935     | -1.17582  | 0.014146152 | 0.229168 |  |
| AKT1(Akt_pS473)                                                                                                                | 0.948901202     | 1.171942821     | -1.16719  | 0.017004134 | 0.229556 |  |
| GSK3A GSK3B(GSK-3a-b_pS21_S9-R-V)                                                                                              | 0.87736123      | 1.080803392     | -1.15144  | 0.048659823 | 0.369511 |  |
| PRKCB(PKC-b-II_pS660-R-V)                                                                                                      | 0.871850633     | 1.071833362     | -1.14868  | 0.000907554 | 0.073512 |  |
| MAPK14(p38-MAPK-R-V)                                                                                                           | 0.905617679     | 1.101034918     | -1.14506  | 0.01066066  | 0.229168 |  |
| ATG7(Atg7-R-V)                                                                                                                 | 0.896793114     | 1.053614705     | -1.11483  | 0.009409163 | 0.229168 |  |
| PTEN(PTEN-R-V)                                                                                                                 | 0.896097906     | 1.029583482     | -1.09694  | 0.020794784 | 0.240625 |  |
| PIK3R1(PI3K-p85-R-V)                                                                                                           | 0.928080999     | 1.058985795     | -1.09498  | 0.01202774  | 0.229168 |  |
| YAP1(YAP_pS127-R-E)                                                                                                            | 0.902019999     | 1.023365166     | -1.08775  | 0.025360697 | 0.28012  |  |
| BRAF(B-Raf_pS445-R-V)                                                                                                          | 0.950656284     | 1.070526522     | -1.08664  | 0.036980722 | 0.295398 |  |
| RPS6K(p90RSK_pT573-R-C)                                                                                                        | 0.94457235      | 1.057634598     | -1.08152  | 0.033410093 | 0.286374 |  |
| AKT1(Akt_pT308-R-V)                                                                                                            | 0.953960797     | 1.066955415     | -1.08147  | 0.03344592  | 0.286374 |  |
| ATG3(Atg3-R-V)                                                                                                                 | 0.941715848     | 1.034591556     | -1.06649  | 0.033288299 | 0.286374 |  |



| <b>Supplementary Table 3. Reverse Phase Protein Array (RPPA) analysis in 344SQP versus 344SQR tumors treated with anti-PD1</b> |                 |                 |           |          |          |  |  |
|--------------------------------------------------------------------------------------------------------------------------------|-----------------|-----------------|-----------|----------|----------|--|--|
| Name                                                                                                                           | 344SQR+anti-PD1 | 344SQP+anti-PD1 | FCH_Treat | P.Value  | FDR      |  |  |
| HIST3H3(Histone-H3-R-V)                                                                                                        | 1.436185685     | 0.823742326     | 1.528846  | 0.031329 | 0.286374 |  |  |
| RB1(Rb_pS807_S811-R-V)                                                                                                         | 1.162809709     | 0.95184406      | 1.157463  | 0.011231 | 0.229168 |  |  |
| EEF2(eEF2-R-C)                                                                                                                 | 1.089460833     | 0.887669061     | 1.150126  | 0.006366 | 0.229168 |  |  |
| PAICS(PAICS-R-C)                                                                                                               | 1.140026763     | 0.974919263     | 1.12125   | 0.008233 | 0.229168 |  |  |
| IGF1R(IGFRb-R-C)                                                                                                               | 1.033271991     | 0.868931095     | 1.120654  | 0.016244 | 0.229556 |  |  |
| EIF4EBP1(4E-BP1-R-V)                                                                                                           | 1.142311656     | 0.994165913     | 1.108144  | 0.034176 | 0.286374 |  |  |
| CTNNB1(b-Catenin-R-V)                                                                                                          | 1.028320415     | 0.885804872     | 1.103828  | 0.033091 | 0.286374 |  |  |
| XBP1(XBP-1-G-C)                                                                                                                | 1.113259085     | 0.978732559     | 1.097732  | 0.009922 | 0.229168 |  |  |
| PARP1(PARP1-R-V)                                                                                                               | 1.059064439     | 0.934784201     | 1.089964  | 0.009685 | 0.229168 |  |  |
| SOX2(Sox2-R-V)                                                                                                                 | 1.090813985     | 0.971738257     | 1.086039  | 0.013587 | 0.229168 |  |  |
| IRF1(IRF-1-R-C)                                                                                                                | 1.076926249     | 0.957971571     | 1.085948  | 0.018926 | 0.240625 |  |  |
| INSRB(IR-b-R-C)                                                                                                                | 1.050014853     | 0.936809066     | 1.081629  | 0.009123 | 0.229168 |  |  |
| INPP4B(INPP4b-R-V)                                                                                                             | 1.079594442     | 0.967300694     | 1.080945  | 0.020113 | 0.240625 |  |  |
| YBX1(YB1_pS102-R-V)                                                                                                            | 1.040302935     | 0.934263403     | 1.07627   | 0.016507 | 0.229556 |  |  |
| CDH1(E-Cadherin-R-V)                                                                                                           | 1.056240224     | 0.974273332     | 1.05846   | 0.037684 | 0.295398 |  |  |
| XRCC1(XRCC1-R-C)                                                                                                               | 1.039682342     | 0.96386856      | 1.053955  | 0.029559 | 0.286374 |  |  |

**Supplementary Table 3. Reverse Phase Protein Array (RPPA) analysis in 344SQP versus 344SQR tumors treated with anti-PD1**

| Name                           | 344SQR+anti-PD1 | 344SQP+anti-PD1 | FCH_Treat | P.Value  | FDR      |  |
|--------------------------------|-----------------|-----------------|-----------|----------|----------|--|
| YWHAB(14-3-3-beta-R-V)         | 1.016002128     | 1.024421077     | -1.00585  | 0.798488 | 0.927787 |  |
| YWHAZ(14-3-3-zeta-R-V)         | 1.028655394     | 1.02228535      | 1.004425  | 0.88257  | 0.940925 |  |
| EIF4EBP1(4E-BP1_pS65-R-V)      | 1.022493271     | 0.992447891     | 1.021044  | 0.402201 | 0.723962 |  |
| TP53BP1(53BP1-R-V)             | 0.988359257     | 0.987077383     | 1.000889  | 0.971717 | 0.979781 |  |
| ARAF(A-Raf-R-V)                | 0.987630892     | 1.054465821     | -1.04742  | 0.266061 | 0.646652 |  |
| ACACA(ACC_pS79-R-V)            | 0.96368948      | 0.985753065     | -1.01541  | 0.814663 | 0.932783 |  |
| ACACA(ACC1-R-C)                | 1.007859117     | 0.992369001     | 1.010795  | 0.816886 | 0.932783 |  |
| AKT1(Akt-R-V)                  | 0.952754134     | 1.020599935     | -1.04815  | 0.389478 | 0.719895 |  |
| PRKAA2(AMPK-a2_pS345-R-V)      | 0.979622939     | 0.987608868     | -1.00555  | 0.796057 | 0.927787 |  |
| PRKAA1(AMPKa-R-C)              | 0.992353405     | 1.020399884     | -1.01963  | 0.671771 | 0.854059 |  |
| PRKAA1(AMPKa_pT172-R-C)        | 0.880358921     | 1.017418917     | -1.09966  | 0.096566 | 0.472879 |  |
| AR(AR-R-V)                     | 0.988904614     | 1.014568413     | -1.01795  | 0.424174 | 0.735275 |  |
| ARID1A(ARID1A-R-C)             | 0.988133794     | 0.847941263     | 1.102052  | 0.101829 | 0.472879 |  |
| ATM(ATM-R-V)                   | 1.025127921     | 1.052258819     | -1.01898  | 0.434305 | 0.738015 |  |
| ATM(ATM_pS1981-R-V)            | 1.067890375     | 0.998852552     | 1.049017  | 0.281373 | 0.646652 |  |
| ATR(ATR_pS428-R-C)             | 0.988908409     | 1.02313449      | -1.02401  | 0.417265 | 0.734749 |  |
| ATRX(ATRX-R-C)                 | 1.099145079     | 0.934138038     | 1.121172  | 0.078321 | 0.4396   |  |
| AIM1(Aurora-B-R-V)             | 0.920699364     | 1.074181901     | -1.11225  | 0.130334 | 0.510824 |  |
| AXL(Axl-R-V)                   | 0.982548877     | 1.029296439     | -1.03293  | 0.550004 | 0.802202 |  |
| ACTB(b-Actin-R-C)              | 1.170498301     | 1.053955963     | 1.084133  | 0.368311 | 0.710314 |  |
| CTNNB1(b-Catenin_pT41_S45-R-V) | 1.018773532     | 1.00180628      | 1.01183   | 0.681842 | 0.854059 |  |
| BRAF(B-Raf-R-V)                | 0.99088914      | 0.987143422     | 1.0026    | 0.899062 | 0.942317 |  |
| VTCN1(B7-H4-R-C)               | 0.974558176     | 1.003007247     | -1.01992  | 0.499928 | 0.783759 |  |
| BAD(Bad_pS112-R-V)             | 1.002770252     | 1.025186279     | -1.01566  | 0.563692 | 0.806855 |  |
| BAK1(Bak-R-C)                  | 0.987960853     | 0.980415891     | 1.005243  | 0.835545 | 0.936284 |  |
| BAX(Bax-R-V)                   | 1.077295599     | 1.035916305     | 1.029097  | 0.412341 | 0.731378 |  |
| BCL2L1(Bcl-xL-R-V)             | 1.072152394     | 1.00775315      | 1.045649  | 0.271078 | 0.646652 |  |
| BCL2A1(Bcl2A1-R-V)             | 1.038627528     | 0.988396466     | 1.035431  | 0.174699 | 0.598242 |  |
| BECN1(Beclin-G-C)              | 0.97121917      | 0.955451662     | 1.010989  | 0.688061 | 0.856598 |  |
| BID(Bid-R-C)                   | 1.069559088     | 1.018547454     | 1.035991  | 0.664801 | 0.850246 |  |
| BCL2L11(Bim-R-V)               | 1.058804037     | 1.012297218     | 1.032761  | 0.304705 | 0.685587 |  |
| BRD4(BRD4-R-V)                 | 0.93863114      | 1.03635161      | -1.07008  | 0.167561 | 0.590107 |  |
| ABL1(c-Abi-R-V)                | 1.007277938     | 1.048021832     | -1.02864  | 0.398465 | 0.722589 |  |
| BIRC3(c-IAP2-R-C)              | 1.029015693     | 1.029176145     | -1.00011  | 0.997353 | 0.997353 |  |
| JUN(c-Jun_pS73-R-V)            | 1.021545965     | 0.948861806     | 1.051672  | 0.112377 | 0.472879 |  |
| KIT(c-Kit-R-V)                 | 0.957539432     | 0.975991617     | -1.01287  | 0.654457 | 0.8475   |  |
| MET(c-Met_pY1234_Y1235-R-V)    | 1.006780879     | 0.99358585      | 1.009188  | 0.717336 | 0.867228 |  |
| MYC(c-Myc-R-C)                 | 1.055993942     | 1.003949879     | 1.036733  | 0.231218 | 0.631598 |  |
| RAF1(C-Raf-R-C)                | 1.029379365     | 1.035219457     | -1.00406  | 0.908434 | 0.942317 |  |
| RAF1(C-Raf_pS338-R-V)          | 0.966528605     | 1.00593716      | -1.02769  | 0.391054 | 0.719895 |  |
| CASP3(Caspase-3-R-C)           | 0.972927237     | 1.028239439     | -1.03908  | 0.212572 | 0.622349 |  |
| CASP7(Caspase-7-cleaved-R-C)   | 1.173166441     | 1.761179829     | -1.50318  | 0.179433 | 0.598242 |  |
| CAV1(Caveolin-1-R-V)           | 0.989501817     | 0.941955829     | 1.033505  | 0.395561 | 0.722589 |  |
| DPP4(CD26-R-V)                 | 1.040580098     | 1.002952997     | 1.026424  | 0.259332 | 0.646652 |  |
| CDK1(Cdc2_pY15-R-C)            | 0.993601833     | 0.991874504     | 1.001198  | 0.9596   | 0.97566  |  |
| CDC25C(cdc25C-R-V)             | 0.970252631     | 1.014104394     | -1.03086  | 0.250269 | 0.646652 |  |
| CDK1(CDK1-R-C)                 | 1.052982997     | 0.961048817     | 1.065798  | 0.216639 | 0.626706 |  |
| CHEK1(Chk1_pS296-R-V)          | 1.093197425     | 1.177885439     | -1.06046  | 0.343878 | 0.698143 |  |
| CHEK2(Chk2_pT68-R-C)           | 0.953794953     | 0.999437768     | -1.03214  | 0.333506 | 0.695756 |  |
| CLDN7(Claudin-7-R-V)           | 0.991265204     | 1.016330462     | -1.01753  | 0.5151   | 0.786164 |  |
| COG3(COG3-R-V)                 | 0.98318969      | 1.016250248     | -1.02318  | 0.331497 | 0.695756 |  |
| COL6A1(Collagen-VI-R-V)        | 1.048253879     | 1.000094322     | 1.033945  | 0.261295 | 0.646652 |  |
| CNST43(Connexin-43-R-C)        | 0.985765548     | 0.864853037     | 1.087422  | 0.209126 | 0.619726 |  |
| PTGS3(Cox-IV-R-V)              | 1.025486305     | 1.088073707     | -1.04434  | 0.630053 | 0.832081 |  |
| CMC2(Cox2-R-C)                 | 1.05297881      | 0.969169652     | 1.059813  | 0.185684 | 0.598242 |  |
| CREB1(Creb-R-C)                | 1.03502034      | 0.998093815     | 1.025926  | 0.485198 | 0.771439 |  |
| CCNB1(Cyclin-B1-R-V)           | 0.994138089     | 0.970321764     | 1.016645  | 0.542331 | 0.802202 |  |
| CCND1(Cyclin-D1-R-V)           | 0.956202151     | 0.981525816     | -1.01771  | 0.488895 | 0.771439 |  |
| TUBA1A(D-a-Tubulin-R-V)        | 0.998141741     | 0.991239209     | 1.004796  | 0.854688 | 0.93977  |  |

|                               |             |             |          |          |          |
|-------------------------------|-------------|-------------|----------|----------|----------|
| PARK7(DJ1-R-V)                | 1.018744176 | 0.977535643 | 1.028975 | 0.466183 | 0.771439 |
| HISTH3(DM-Histone-H3-R-V)     | 1.039263553 | 1.004907517 | 1.0241   | 0.547003 | 0.802202 |
| H3K9ME2(DM-K9-Histone-H3-R-C) | 1.091679941 | 0.937140852 | 1.113066 | 0.188984 | 0.598242 |
| DUSP4(DUSP4-R-V)              | 0.982154817 | 0.977472591 | 1.003251 | 0.906356 | 0.942317 |
| EEF2K(eEF2K-R-V)              | 0.977134486 | 1.007571412 | -1.02132 | 0.564466 | 0.806855 |
| EGFR(EGFR-R-V)                | 1.100941907 | 1.04860111  | 1.036946 | 0.180583 | 0.598242 |
| EGFR(EGFR_pY1173-R-V)         | 1.044711467 | 1.014124731 | 1.021427 | 0.61508  | 0.829313 |
| EIF4E(eIF4E-R-V)              | 1.002017984 | 0.999816532 | 1.001527 | 0.965107 | 0.977171 |
| EIF4E(eIF4E_pS209-R-V)        | 0.996282173 | 1.030822262 | -1.02423 | 0.267794 | 0.646652 |
| EIF4G1(eIF4G-R-C)             | 1.027001929 | 0.982611415 | 1.031247 | 0.348167 | 0.698143 |
| ELK1(Elk1_pS383-R-C)          | 1.038820927 | 0.992298898 | 1.032772 | 0.316575 | 0.693043 |
| ESR1(ER-a_pS118-R-V)          | 1.015067485 | 0.978698964 | 1.025529 | 0.255652 | 0.646652 |
| ESR1(ER-R-V)                  | 0.969414109 | 0.983513274 | -1.00982 | 0.659167 | 0.8475   |
| ERCC5(ERCC5-R-C)              | 1.026028375 | 0.963403842 | 1.044364 | 0.109643 | 0.472879 |
| ETS1(Ets-1-R-V)               | 1.047509155 | 1.09466607  | -1.03323 | 0.604805 | 0.829313 |
| PTK2(FAK-R-C)                 | 1.064566412 | 1.021269196 | 1.030466 | 0.458085 | 0.771439 |
| PTK2(FAK_pY397-R-V)           | 0.925984101 | 0.977020546 | -1.03601 | 0.219258 | 0.626821 |
| FASN(FASN-R-V)                | 0.966554928 | 0.969596856 | -1.00211 | 0.956326 | 0.97566  |
| FOXM1(FoxM1-R-V)              | 1.005548319 | 0.996730653 | 1.006131 | 0.870797 | 0.940925 |
| FOX3(FoxO3a-R-C)              | 0.975233993 | 1.010805884 | -1.02496 | 0.261519 | 0.646652 |
| FOXO3(FoxO3a_pS318_S321-R-C)  | 0.994672797 | 1.024138302 | -1.02063 | 0.329374 | 0.695756 |
| FOSL1(FRA-1-R-C)              | 1.031895917 | 0.983406773 | 1.034181 | 0.204203 | 0.612609 |
| G6PD(G6PD-R-V)                | 0.974359454 | 1.012843706 | -1.02703 | 0.429232 | 0.735275 |
| GCLM(GCLM-R-C)                | 1.063532972 | 1.069173906 | -1.00392 | 0.931415 | 0.959042 |
| KAT2A(GCN5L2-R-V)             | 1.024131272 | 0.945258984 | 1.056192 | 0.075911 | 0.4396   |
| GLUD(Glutamate-D1-2-R-C)      | 1.119274686 | 1.072088987 | 1.033247 | 0.334994 | 0.695756 |
| GLS(Glutaminase-R-C)          | 0.975839153 | 1.017313751 | -1.02917 | 0.355714 | 0.698143 |
| GYS1(Gys-R-V)                 | 0.884331636 | 1.170858898 | -1.2197  | 0.053403 | 0.381675 |
| GYS1(Gys_pS641-R-V)           | 1.005470069 | 1.026934943 | -1.01499 | 0.47455  | 0.771439 |
| ERBB2(HER2_pY1248-R-C)        | 0.98131649  | 0.987946724 | -1.00461 | 0.824226 | 0.933549 |
| ERBB3(HER3-R-V)               | 1.003233239 | 0.89462598  | 1.078187 | 0.05951  | 0.403529 |
| ERBB3(HER3_pY1289-R-C)        | 1.000446493 | 0.989267759 | 1.007779 | 0.745926 | 0.88853  |
| NRG1(Heregulin-R-V)           | 1.013182652 | 1.0855781   | -1.05146 | 0.706092 | 0.860908 |
| HES1(HES1-R-V)                | 1.110359457 | 0.971741092 | 1.10085  | 0.061443 | 0.403529 |
| HK2(Hexokinase-II-R-V)        | 1.073242286 | 1.013486951 | 1.042289 | 0.151747 | 0.551293 |
| HSBP1(HSP27_pS82-R-V)         | 1.024515394 | 0.927376355 | 1.06965  | 0.092762 | 0.472879 |
| HSPA1A(HSP70-R-C)             | 1.066025078 | 0.978595941 | 1.062475 | 0.241396 | 0.644607 |
| IGF1R(IGF1R_pY1135_Y1136-R-V) | 0.998555854 | 1.013133689 | -1.01016 | 0.744994 | 0.88853  |
| IGFBP2(IGFBP2-R-V)            | 1.01522399  | 0.972366127 | 1.030152 | 0.33131  | 0.695756 |
| IRS1(IRS1-R-V)                | 1.036407631 | 0.97485262  | 1.04359  | 0.081407 | 0.4396   |
| JAG1(Jagged1-R-V)             | 0.980675014 | 0.986606575 | -1.00412 | 0.901371 | 0.942317 |
| JAK2(Jak2-R-V)                | 1.02118038  | 1.012038216 | 1.006357 | 0.847558 | 0.936284 |
| MAPK8(JNK_pT183_Y185-R-V)     | 1.014312759 | 1.03124293  | -1.0118  | 0.739399 | 0.88853  |
| MAPK9(JNK2-R-C)               | 1.067353565 | 1.007243538 | 1.042545 | 0.275632 | 0.646652 |
| LC3AB(LC3A-B-R-C)             | 1.095161397 | 1.040187792 | 1.03884  | 0.625472 | 0.832081 |
| LCK(Lck-R-V)                  | 1.064125342 | 1.145561706 | -1.05807 | 0.515763 | 0.786164 |
| LDHA(LDHA-R-C)                | 1.028392572 | 1.007071033 | 1.014889 | 0.550534 | 0.802202 |
| LRP6(LRP6_pS1490-R-V)         | 0.98680145  | 0.98209026  | 1.003271 | 0.880752 | 0.940925 |
| MAPK3(MAPK_pT202_Y204-R-V)    | 0.983583957 | 1.011325783 | -1.01942 | 0.466932 | 0.771439 |
| MCL1(Mcl-1-R-V)               | 1.028754449 | 1.073964699 | -1.03183 | 0.281495 | 0.646652 |
| SLC16A4(MCT4-R-V)             | 0.934075922 | 1.047434817 | -1.08174 | 0.11676  | 0.472879 |
| MDM2(MDM2_pS166-R-V)          | 1.041605992 | 0.924585576 | 1.084493 | 0.186244 | 0.598242 |
| MAP2K1(MEK1-R-V)              | 0.961608679 | 0.981609433 | -1.01396 | 0.587009 | 0.825373 |
| MAP2K1(MEK1_pS217_S221-R-V)   | 1.002281658 | 1.021248407 | -1.01323 | 0.580344 | 0.824699 |
| BABAM1(MERIT40_pS29-R-V)      | 1.047978547 | 1.038332008 | 1.006709 | 0.881191 | 0.940925 |
| NF2(Merlin-R-C)               | 1.027693402 | 1.008664078 | 1.013277 | 0.700516 | 0.859724 |
| MIF(MIF-R-C)                  | 0.951905293 | 1.025376485 | -1.05225 | 0.113547 | 0.472879 |
| MMP2(MMP2-R-V)                | 0.983355392 | 1.061915373 | -1.05596 | 0.232098 | 0.631598 |
| MKNK1(Mnk1-R-V)               | 0.969287745 | 1.038565145 | -1.04919 | 0.080138 | 0.4396   |
| MSH6(MSH6-R-C)                | 1.046354004 | 0.958478116 | 1.062804 | 0.07409  | 0.4396   |
| MSI2(MSI2-R-C)                | 0.928088801 | 1.029988346 | -1.07319 | 0.097057 | 0.472879 |

|                              |             |             |          |          |          |
|------------------------------|-------------|-------------|----------|----------|----------|
| MTOR(mTOR-R-V)               | 0.940080999 | 1.02928876  | -1.06379 | 0.228853 | 0.631598 |
| MTOR(mTOR_pS2448-R-C)        | 0.97228794  | 0.999780916 | -1.01924 | 0.65721  | 0.8475   |
| MYH11(Myosin-11-R-V)         | 0.976519925 | 0.944339874 | 1.022556 | 0.838654 | 0.936284 |
| MYO2A(Myosin-IIa_pS1943-R-V) | 0.999260675 | 1.044235308 | -1.03167 | 0.503666 | 0.784556 |
| MYT1(Myt1-R-C)               | 0.964113035 | 1.025685177 | -1.0436  | 0.107804 | 0.472879 |
| CDH2(N-Cadherin-R-V)         | 0.994718216 | 1.018444714 | -1.01658 | 0.517639 | 0.786164 |
| NAPSA(NAPSIN-A-R-C)          | 0.993411284 | 1.005618842 | -1.0085  | 0.694444 | 0.856598 |
| NDRG1(NDRG1_pT346-R-V)       | 0.993916987 | 1.16248877  | -1.12395 | 0.101667 | 0.472879 |
| NFKB1(NF-kB-p65_pS536-R-C)   | 0.996240175 | 0.976491769 | 1.013783 | 0.532339 | 0.802202 |
| NOTCH1(Notch1-R-V)           | 0.974206752 | 0.926051509 | 1.033942 | 0.587612 | 0.825373 |
| NOTCH3(Notch3-R-C)           | 1.029483165 | 1.010140911 | 1.013497 | 0.680775 | 0.854059 |
| 4-Oct(Oct-4-R-C)             | 0.990873588 | 0.960964203 | 1.020948 | 0.353496 | 0.698143 |
| CDH3(P-Cadherin-R-C)         | 1.015572464 | 0.994779638 | 1.014517 | 0.617719 | 0.829313 |
| CDKN1A(p21-R-V)              | 0.991062962 | 1.012186869 | -1.01475 | 0.551308 | 0.802202 |
| CDKN1B(p27-Kip-1-R-V)        | 0.988768988 | 1.006850162 | -1.01261 | 0.638686 | 0.838731 |
| CDKN1B(p27_pT198-R-V)        | 1.050516863 | 1.016055482 | 1.024174 | 0.389604 | 0.719895 |
| MAPK14(p38_pT180_Y182-R-V)   | 0.850377445 | 0.990610257 | -1.10208 | 0.080331 | 0.4396   |
| MAPK3(p44-42-MAPK-R-V)       | 0.996986421 | 1.025638479 | -1.02006 | 0.545931 | 0.802202 |
| TP53(p53-R-C)                | 1.027396405 | 1.000620326 | 1.018733 | 0.598117 | 0.829313 |
| RPS6KB1(p70-S6K_pT389-R-V)   | 0.954456502 | 1.03168225  | -1.05499 | 0.059907 | 0.403529 |
| RPS6KB1(p70-S6K1-R-V)        | 0.975649312 | 0.998715327 | -1.01612 | 0.629968 | 0.832081 |
| PAK1(PAK1-R-V)               | 1.00149347  | 0.966183973 | 1.024777 | 0.614633 | 0.829313 |
| PAK4(PAK4-R-V)               | 0.99633473  | 1.040664892 | -1.0312  | 0.343484 | 0.698143 |
| PAR(PAR-R-C)                 | 1.272138179 | 0.890327757 | 1.302976 | 0.118981 | 0.473972 |
| PAX8(PAX8-R-C)               | 0.95018932  | 0.962507532 | -1.00857 | 0.692074 | 0.856598 |
| PXN(Paxillin-R-C)            | 0.994747861 | 0.9293991   | 1.046338 | 0.310368 | 0.685632 |
| CD274(PD-L1-R-C)             | 0.919877397 | 1.048868038 | -1.09353 | 0.612986 | 0.829313 |
| PDCD1(Pdcd-1L1-G-C)          | 1.06479464  | 0.966124689 | 1.070786 | 0.052675 | 0.381675 |
| PDCD4(Pdcd4-R-C)             | 0.926246113 | 0.987879352 | -1.04328 | 0.203407 | 0.612609 |
| PDGFR(PDGFR-b-R-V)           | 0.947288953 | 0.939073766 | 1.005711 | 0.905474 | 0.942317 |
| PDHK1(PDHK1-R-C)             | 0.9414977   | 1.00239073  | -1.04311 | 0.255081 | 0.646652 |
| PDK1(PDK1-R-V)               | 0.843808468 | 1.046666381 | -1.15098 | 0.279915 | 0.646652 |
| PDK1(PDK1_pS241-R-V)         | 1.070629004 | 0.986038636 | 1.060387 | 0.113261 | 0.472879 |
| PEA15(PEA-15-R-V)            | 1.036825395 | 1.0255523   | 1.007845 | 0.847665 | 0.936284 |
| PEA15(PEA-15_pS116-R-V)      | 1.02563928  | 0.995231297 | 1.021301 | 0.356254 | 0.698143 |
| PIK3C2A(PI3K-p110-a-R-C)     | 0.984473161 | 1.049790429 | -1.04632 | 0.116521 | 0.472879 |
| PRKAR1A(PKA-a-R-V)           | 1.122131477 | 1.009957801 | 1.080856 | 0.195368 | 0.608647 |
| PRKCA(PKC-a_pS657-R-C)       | 1.059049635 | 1.003271013 | 1.03942  | 0.189566 | 0.598242 |
| PRKCD(PKC-delta_pS664-R-V)   | 0.981489808 | 0.998031928 | -1.01153 | 0.601217 | 0.829313 |
| PKM2(PKM2-R-C)               | 1.087395488 | 1.032858778 | 1.038526 | 0.641991 | 0.838731 |
| PLCG2(PLC-gamma2_pY759-R-C)  | 0.976594447 | 1.032490358 | -1.0395  | 0.138874 | 0.527288 |
| PLK1(PLK1-R-C)               | 0.99317841  | 0.981934177 | 1.007824 | 0.893536 | 0.942317 |
| PMS2(PMS2-R-V)               | 0.98405524  | 1.020545909 | -1.02562 | 0.376126 | 0.714052 |
| PGR(PR-R-V)                  | 0.987025266 | 0.99968235  | -1.00881 | 0.76161  | 0.902787 |
| AKT1S1(PRAS40_pT246-R-V)     | 0.991404477 | 0.985284384 | 1.004251 | 0.878537 | 0.940925 |
| PREX1(PREX1-R-V)             | 0.950546276 | 0.990428938 | -1.02803 | 0.307931 | 0.685632 |
| RAB11A(Rab11-R-E)            | 1.036203979 | 1.026543533 | 1.006719 | 0.817625 | 0.932783 |
| RAB25(Rab25-R-V)             | 0.902723693 | 0.973633734 | -1.05038 | 0.152003 | 0.551293 |
| RAD51(Rad51-R-V)             | 1.090765431 | 1.009780413 | 1.05774  | 0.085843 | 0.453477 |
| RPTOR(Raptor-R-V)            | 1.041852701 | 1.038505786 | 1.002323 | 0.942064 | 0.965914 |
| RBM15(RBM15-R-V)             | 1.017893166 | 0.958177902 | 1.04226  | 0.13497  | 0.520599 |
| RICTOR(Rictor-R-C)           | 0.946877054 | 1.001667742 | -1.03871 | 0.409577 | 0.731378 |
| RICTOR(Rictor_pT1135-R-V)    | 0.966053761 | 0.996562668 | -1.02137 | 0.485696 | 0.771439 |
| RIP(RIP-R-C)                 | 0.916735974 | 1.051365092 | -1.09781 | 0.068194 | 0.424899 |
| ROCK1(Rock-1-R-C)            | 0.959803299 | 1.000668088 | -1.02873 | 0.476526 | 0.771439 |
| RPA2(RPA32_pS4_S8-R-C)       | 0.967809735 | 0.94262963  | 1.017607 | 0.782012 | 0.922471 |
| RPS6KA1(RSK-R-C)             | 1.021922775 | 1.053067877 | -1.02182 | 0.429667 | 0.735275 |
| RPS6(S6_pS235_S236-R-V)      | 1.002182231 | 1.056525977 | -1.03839 | 0.611956 | 0.829313 |
| RPS6(S6_pS240_S244-R-V)      | 1.013970092 | 0.992494969 | 1.014997 | 0.863694 | 0.940925 |
| SDHA(SDHA-R-V)               | 1.091968416 | 0.979713443 | 1.080916 | 0.100919 | 0.472879 |
| SHC1(Shc_pY317-R-V)          | 0.999428732 | 0.987290965 | 1.008449 | 0.708566 | 0.860908 |

|                          |             |             |          |          |          |
|--------------------------|-------------|-------------|----------|----------|----------|
| PTPN11(SHP-2_pY542-R-C)  | 0.938300174 | 0.997824041 | -1.04212 | 0.106862 | 0.472879 |
| SLC1A5(SLC1A5-R-C)       | 1.079686225 | 1.038819988 | 1.028731 | 0.792023 | 0.927787 |
| SMAD1(Smad1-R-V)         | 1.056832678 | 1.015607027 | 1.028988 | 0.282079 | 0.646652 |
| SMAD3(Smad3-R-V)         | 1.018871014 | 0.978153514 | 1.028625 | 0.380167 | 0.716129 |
| SRC(Src_pY416-R-V)       | 0.979432043 | 1.003462504 | -1.0168  | 0.508035 | 0.786164 |
| SRC(Src_pY527-R-V)       | 0.959998657 | 1.011411868 | -1.03628 | 0.299254 | 0.679614 |
| STAT(Stat_pY694-R-N)     | 0.988766812 | 1.055361261 | -1.04724 | 0.15555  | 0.555862 |
| STAT3(Stat3-R-C)         | 0.8504577   | 1.017609605 | -1.12284 | 0.186502 | 0.598242 |
| STAT5A(Stat5a-R-V)       | 1.042990888 | 0.951784543 | 1.065261 | 0.226569 | 0.631598 |
| STMN1(Stathmin-1-R-V)    | 0.953139659 | 1.018587868 | -1.04641 | 0.199151 | 0.612577 |
| TAZ(TAZ-R-V)             | 0.974654671 | 1.040352395 | -1.04659 | 0.066271 | 0.423789 |
| TFAM(TFAM-R-V)           | 0.955765735 | 0.96097697  | -1.00362 | 0.911294 | 0.942317 |
| TFRC(TFRC-R-V)           | 0.972993844 | 1.047161538 | -1.05275 | 0.329589 | 0.695756 |
| TIGAR(TIGAR-R-V)         | 0.939045107 | 1.01014504  | -1.05052 | 0.233925 | 0.631598 |
| TRIM25(TRIM25-R-C)       | 1.027547954 | 1.16498164  | -1.09995 | 0.352051 | 0.698143 |
| TSC1(TSC1-R-C)           | 0.988617373 | 1.027950045 | -1.02764 | 0.48622  | 0.771439 |
| TTF1(TTF1-R-V)           | 1.030522562 | 1.008587881 | 1.01532  | 0.555767 | 0.803878 |
| TSC2(Tuberin-R-V)        | 1.00262641  | 1.009404662 | -1.00471 | 0.882844 | 0.940925 |
| TSC2(Tuberin_pT1462-R-V) | 1.006593003 | 1.029327527 | -1.01588 | 0.471142 | 0.771439 |
| TUFM(TUFM-R-V)           | 1.016871798 | 1.047005518 | -1.02111 | 0.428887 | 0.735275 |
| TYRO3(Tyro3-R-V)         | 1.021050207 | 1.021202551 | -1.00011 | 0.996052 | 0.997353 |
| UBAC1(UBAC1-R-V)         | 1.017426194 | 0.965559574 | 1.036605 | 0.2786   | 0.646652 |
| ULK1(ULK1_pS757-R-C)     | 0.961140121 | 1.018301056 | -1.04042 | 0.141722 | 0.529824 |
| VASP(VASP-R-V)           | 1.01464784  | 0.974167047 | 1.028457 | 0.372732 | 0.713179 |
| KDR(VEGFR-2-R-V)         | 1.010889486 | 0.998452343 | 1.008658 | 0.825979 | 0.933549 |
| WEE1(Wee1-R-C)           | 0.972246554 | 0.981382454 | -1.00635 | 0.801791 | 0.927787 |
| WIPI1(WIPI1-R-C)         | 1.00276468  | 0.994394131 | 1.005819 | 0.84386  | 0.936284 |
| WIPI2(WIPI2-R-C)         | 0.981949502 | 1.00437769  | -1.01567 | 0.464352 | 0.771439 |
| YAP1(YAP-R-E)            | 1.021591405 | 1.040565826 | -1.01324 | 0.677597 | 0.854059 |
| ZAP70(ZAP-70-R-C)        | 1.021194615 | 1.134941437 | -1.08203 | 0.365081 | 0.709717 |

**Supplementary Table 4.** Nanostring analysis in tumor infiltrating lymphocytes from 344SQP versus 344SQR tumors treated with anti-PD1

| Symbol  | 344SQR+anti-PD1 mean | 344SQP+anti-PD1 mean | P.Value | FDR   | FCH | Resldrug/Pardrug |
|---------|----------------------|----------------------|---------|-------|-----|------------------|
| Slc7a11 | 3.768                | 7.629                | 0.000   | 0.042 |     | -14.534          |
| Ptgd2   | 5.313                | 7.898                | 0.001   | 0.163 |     | -6.000           |
| Il1a    | 7.681                | 10.111               | 0.002   | 0.175 |     | -5.389           |
| Cd53    | 5.449                | 7.670                | 0.003   | 0.175 |     | -4.659           |
| Clec5a  | 7.229                | 9.467                | 0.004   | 0.175 |     | -4.717           |
| Irak3   | 6.096                | 8.444                | 0.004   | 0.175 |     | -5.091           |
| Fpr2    | 9.639                | 12.020               | 0.005   | 0.175 |     | -5.210           |
| Mapk14  | 3.722                | 6.376                | 0.005   | 0.175 |     | -6.293           |
| Atf1    | 4.694                | 6.973                | 0.005   | 0.175 |     | -4.853           |
| Ccr2    | 6.880                | 9.398                | 0.006   | 0.175 |     | -5.726           |
| Gbp5    | 7.629                | 9.971                | 0.006   | 0.175 |     | -5.068           |
| Clec7a  | 7.573                | 9.665                | 0.006   | 0.175 |     | -4.263           |
| Itga4   | 7.442                | 9.585                | 0.006   | 0.175 |     | -4.416           |
| Gbp2b   | 9.419                | 11.580               | 0.006   | 0.175 |     | -4.471           |
| Fas     | 6.241                | 8.256                | 0.006   | 0.175 |     | -4.041           |
| Ifih1   | 4.520                | 6.709                | 0.007   | 0.181 |     | -4.557           |
| Mefv    | 8.419                | 10.501               | 0.008   | 0.199 |     | -4.232           |
| Ccl17   | 8.465                | 10.402               | 0.010   | 0.219 |     | -3.829           |
| Tnf     | 9.514                | 11.570               | 0.010   | 0.219 |     | -4.158           |
| Ccl24   | 12.240               | 14.445               | 0.010   | 0.219 |     | -4.611           |
| Il1r1   | 8.686                | 10.660               | 0.010   | 0.219 |     | -3.929           |
| Cd200r1 | 7.375                | 9.112                | 0.013   | 0.233 |     | -3.333           |
| Ccr3    | 9.148                | 10.910               | 0.014   | 0.233 |     | -3.392           |
| Herc6   | 6.126                | 8.136                | 0.015   | 0.233 |     | -4.025           |
| Ikzf1   | 7.603                | 9.365                | 0.015   | 0.233 |     | -3.391           |
| Dpp4    | 4.546                | 6.211                | 0.016   | 0.233 |     | -3.171           |
| Il1r2   | 9.821                | 11.435               | 0.016   | 0.233 |     | -3.060           |
| Creb5   | 5.877                | 7.568                | 0.017   | 0.233 |     | -3.230           |
| Nod2    | 7.637                | 9.322                | 0.018   | 0.233 |     | -3.214           |
| Il18    | 7.247                | 8.932                | 0.018   | 0.233 |     | -3.216           |
| Tlr6    | 7.382                | 9.291                | 0.018   | 0.233 |     | -3.755           |
| Rsad2   | 7.039                | 8.979                | 0.019   | 0.233 |     | -3.835           |
| Cd33    | 9.322                | 10.915               | 0.019   | 0.233 |     | -3.016           |
| Cxcl2   | 8.715                | 10.383               | 0.019   | 0.233 |     | -3.178           |
| Ifit2   | 4.421                | 6.153                | 0.019   | 0.233 |     | -3.322           |
| Cd274   | 10.977               | 12.855               | 0.020   | 0.233 |     | -3.677           |
| Sell    | 9.804                | 11.465               | 0.020   | 0.233 |     | -3.162           |
| Il15ra  | 4.474                | 6.066                | 0.021   | 0.233 |     | -3.013           |
| Ifi44l  | 7.032                | 8.906                | 0.022   | 0.233 |     | -3.665           |
| Il13ra1 | 8.807                | 10.426               | 0.022   | 0.233 |     | -3.072           |
| Nlrp3   | 10.833               | 12.615               | 0.022   | 0.233 |     | -3.438           |
| Il18rap | 7.357                | 8.956                | 0.022   | 0.233 |     | -3.028           |
| H60a    | 6.423                | 8.037                | 0.022   | 0.233 |     | -3.060           |
| Slamf6  | 4.805                | 6.450                | 0.025   | 0.248 |     | -3.127           |
| Cd80    | 9.049                | 10.580               | 0.025   | 0.248 |     | -2.891           |
| Cxcr2   | 9.533                | 11.245               | 0.026   | 0.253 |     | -3.276           |
| Cd28    | 5.134                | 7.292                | 0.029   | 0.273 |     | -4.463           |
| Il1rn   | 13.593               | 15.220               | 0.030   | 0.275 |     | -3.088           |
| Il18r1  | 6.084                | 7.493                | 0.030   | 0.275 |     | -2.656           |
| Amica1  | 9.221                | 10.745               | 0.031   | 0.276 |     | -2.876           |
| Il1b    | 12.553               | 14.180               | 0.032   | 0.282 |     | -3.088           |
| Hif1a   | 11.203               | 12.700               | 0.033   | 0.283 |     | -2.822           |
| Bst1    | 9.098                | 10.605               | 0.034   | 0.283 |     | -2.842           |
| Cd86    | 9.154                | 10.680               | 0.035   | 0.283 |     | -2.881           |
| Cd84    | 9.425                | 10.905               | 0.036   | 0.283 |     | -2.789           |
| Chil3   | 12.077               | 13.860               | 0.036   | 0.283 |     | -3.442           |
| Irgm2   | 6.745                | 8.159                | 0.037   | 0.283 |     | -2.663           |
| Il7r    | 8.805                | 10.276               | 0.037   | 0.283 |     | -2.771           |
| Akt3    | 7.020                | 8.422                | 0.038   | 0.283 |     | -2.642           |
| Csf2rb  | 12.097               | 13.520               | 0.038   | 0.283 |     | -2.682           |
| Rel     | 8.366                | 9.823                | 0.038   | 0.283 |     | -2.746           |
| Cxcl10  | 9.043                | 10.670               | 0.039   | 0.285 |     | -3.089           |
| Il12rb2 | 6.133                | 7.479                | 0.043   | 0.302 |     | -2.541           |
| Lif     | 5.718                | 7.115                | 0.045   | 0.305 |     | -2.634           |
| Mertk   | 7.493                | 8.854                | 0.046   | 0.305 |     | -2.568           |
| Cxcl11  | 8.271                | 9.650                | 0.046   | 0.305 |     | -2.599           |
| Lyn     | 11.233               | 12.615               | 0.047   | 0.305 |     | -2.606           |
| Cybb    | 10.947               | 12.325               | 0.047   | 0.305 |     | -2.600           |
| Tlr1    | 6.618                | 8.170                | 0.048   | 0.305 |     | -2.932           |

|      |        |        |       |       |        |
|------|--------|--------|-------|-------|--------|
| Ccl6 | 13.037 | 14.410 | 0.050 | 0.305 | -2.591 |
| Hck  | 8.719  | 10.039 | 0.050 | 0.305 | -2.495 |

**Supplementary Table 4.** Nanostring analysis in tumor infiltrating lymphocytes from 344SQP versus 344SQR tumors treated with anti-PD1

| Symbol  | 344SQR+anti-PD1_mean | 344SQP+anti-PD1_mean | P.Value   | FDR    | FCH_ResIdrug/Pardrug |
|---------|----------------------|----------------------|-----------|--------|----------------------|
| Muc1    | 8.594                | 5.466                | 0.0004211 | 0.1072 | 8.744                |
| ErbB2   | 7.181                | 3.415                | 0.0021734 | 0.1752 | 13.604               |
| Colec12 | 7.780                | 5.296                | 0.0022187 | 0.1752 | 5.593                |
| Il22ra1 | 8.133                | 6.450                | 0.014645  | 0.2327 | 3.210                |
| Ccl8    | 11.950               | 10.319               | 0.01499   | 0.2327 | 3.098                |
| Ctsg    | 5.503                | 3.586                | 0.0156567 | 0.2327 | 3.777                |
| Pdgfc   | 9.074                | 7.426                | 0.0262608 | 0.2528 | 3.135                |
| Itgb4   | 10.107               | 8.741                | 0.0344695 | 0.2826 | 2.579                |
| Il3ra   | 7.010                | 5.512                | 0.0418838 | 0.3003 | 2.825                |
| Blnk    | 7.099                | 5.671                | 0.0432657 | 0.3017 | 2.692                |
| Ccr8    | 6.077                | 4.757                | 0.0483025 | 0.305  | 2.496                |



**Supplementary Table 5a.** TCGA LUAD cohort Univariate analysis. The p-values are given by the Wald test. All statistical test were two-sided.

| variable                | HR    | lower .95 | upper .95 | p-value    | no pt. |
|-------------------------|-------|-----------|-----------|------------|--------|
| Age (continuous)        | 0.999 | 0.98      | 1.01      | 0.88914    | 422    |
| Smoking (Ever vs Never) | 0.87  | 0.55      | 1.37      | 0.55186    | 419    |
| Gender (Male vs Female) | 0.95  | 0.69      | 1.31      | 0.77607    | 431    |
| Stage (III-IV vs I-II)  | 2.64  | 1.88      | 3.69      | 0.00000002 | 423    |
| BMP7 (FPKM)(continuous) | 1.19  | 1.02      | 1.39      | 0.0247     | 431    |

**Supplementary Table 5b.** TCGA LUAD cohort Multivariate analysis Stage & BMP7 (n=423). The p-values are given by the Wald test. All statistical test were two-sided.

| variable                | HR   | lower .95 | upper .95 | p-value    |
|-------------------------|------|-----------|-----------|------------|
| Stage (III-IV vs I-II)  | 2.57 | 1.83      | 3.6       | 0.00000005 |
| BMP7 (FPKM)(continuous) | 1.14 | 0.98      | 1.32      | 0.09778    |

**Supplementary Table 5c.** Der SD et al, LUAD cohort Univariate analysis (n=127).The p-values are given by the Wald test. All statistical test were two-sided.

| variable                        | HR   | lower .95 | upper .95 | p-value |
|---------------------------------|------|-----------|-----------|---------|
| Gender                          | 1.41 | 0.81      | 2.46      | 0.22804 |
| Stage (II vs I)                 | 2.44 | 1.38      | 4.32      | 0.0021  |
| Age (continuous)                | 1.02 | 0.99      | 1.05      | 0.19195 |
| Smoking (Ever vs Never)         | 1.68 | 0.75      | 3.77      | 0.20721 |
| BMP7 (209590_at) (continuous)   | 1.17 | 0.91      | 1.52      | 0.22187 |
| BMP7 (209591_s_at) (continuous) | 1.16 | 1         | 1.35      | 0.04274 |
| BMP7 (211259_s_at) (continuous) | 1.4  | 0.89      | 2.2       | 0.14535 |
| BMP7 (211260_at) (continuous)   | 5.4  | 1.7       | 17.15     | 0.00426 |
| BMP7 (233583_at) (continuous)   | 1.12 | 0.29      | 4.29      | 0.86452 |

**Supplementary Table 5d.** Der SD et al, LUAD cohort Multivariate analysis Stage & BMP7 (209591\_s\_at) (n=127).The p-values are given by the Wald test. All statistical test were two-sided.

| variable                        | HR   | lower .95 | upper .95 | p-value |
|---------------------------------|------|-----------|-----------|---------|
| Stage (II vs I)                 | 2.4  | 1.36      | 4.24      | 0.00252 |
| BMP7 (209591_s_at) (continuous) | 1.15 | 0.998     | 1.32      | 0.05349 |

**Supplementary Table 5e.** Der SD et al, LUAD cohort Multivariate analysis Stage & BMP7 (211260\_at) (n=127). The p-values are given by the Wald test. All statistical test were two-sided.

| variable                      | HR   | lower .95 | upper .95 | p-value |
|-------------------------------|------|-----------|-----------|---------|
| Stage (II vs I)               | 2.42 | 1.37      | 4.29      | 0.00234 |
| BMP7 (211260_at) (continuous) | 5.43 | 1.68      | 17.53     | 0.00463 |

Supplementary Table 6. List of Primers used in quantitative PCR (qPCR) analysis

|           |                        |
|-----------|------------------------|
| BMP7 Fw   | CAGCCAGAATCGCTCCAAGA   |
| BMP7 Rv   | GCAATGATCCAGTCCTGCCA   |
| MAPK14 Fw | ATCATTACGCCCCAAAAGGAC  |
| MAPK14 Rv | AGCTTCTGGCACTTCACGAT   |
| IL1A Fw   | CGCTTGAGTCGGCAAAGAAAT  |
| IL1A Rv   | TGGCAGAACTGTAGTCTTCGT  |
| IL1B Fw   | GTGGCAGCTACCTGTGTCTT   |
| IL1B Rv   | AATGGGAACGTCACACACCA   |
| TNF Fw    | CGGGCAGGTCTACTTTGGAG   |
| TNF Rv    | AAGGATACAGACTGGGGGCT   |
| CCL5_Fw   | CTCACCATATGGCTCGGACA   |
| CCL5_Rv   | CRACTGCAAGATTGGAGCAC   |
| IFNG_Fw   | CGGCACAGTCATTGAAAGCC   |
| IFNG_Rv   | TGTCACCATCCTTTTGCCAGT  |
| IL2_Fw    | AGGAACCTGAAACTCCCCAG   |
| IL2_Rv    | CTTTCAATTCTGTGGCCTGCTT |
| ACTB_Fw   | GTGACGTTGACATCCGTAAAGA |
| ACTB_Rv   | GCCGGACTCATCGTACTCC    |
| CD45_Fw   | CTTTGCTTATGTGGCGTGTGT  |
| CD45_Rv   | TTATCCCCTTCTGATGCGCC   |

## **Supplementary Methods**

### **Bio-Plex mouse cytokine 23-plex assay**

Serum samples were collected from mice bearing 344SQP or 344SQR tumors treated with anti-PD1 twice per week for a total of 4 doses. At 24 hours after the last anti-PD1 treatment, whole blood samples were collected by cardiac puncture and centrifuged at 1,000×g for 10 min, and serum was collected and kept in –80°C until analysis. Serum was diluted 1:4 with diluent solutions from the BioPlex Multiplex assay (BioRad). Twenty-three cytokines, including IL1A, IL1B, TNF, CCL5, IFNG, and IL2 were measured by ELISA according to the manufacturer's protocol (Biorad, Catalog #m60009rdpd).

### **Transfection siRNA**

siRNA targeting MAPK14 (Life Technologies, Cat #4390771) and its respective negative-control negative control (Life Technologies, Cat #4390843) were reverse-transfected into RAW 264.7 macrophages with Lipofectamine 2000 (Life Technologies) to a final concentration of 100 nm/L.

### **Co-culture experiments and treatments**

Viable cells were counted with a hemocytometer (0.4% Trypan blue solution) and diluted to 40,000 cells per well in 24-wells plates. 344SQR cells were seeded at the top inserts (24-mm Transwell with 0.4-µm pore polycarbonate membrane insert, Sigma-Aldrich), and RAW 264.7, or peritoneal macrophages were seeded at the bottom of the transwell system. Cells were then cultured in complete medium (RPMI-1640 supplemented with 100 units/mL penicillin, 100 µg/mL streptomycin, and 10% heat-inactivated fetal bovine serum) and incubated at 37°C in 5% CO<sub>2</sub> for 24 or 48 hours, after which cells were treated with K02288 (6.4 nM) (catalog # S7359, Selleck

Chemicals) for 24 or 48 hours. RNA was then isolated from RAW 264.7 cells or peritoneal macrophages and analyzed for MAPK14, IL1A, IL1B, TNF and CCL5 expression with qPCR.

### **In vivo study in triple negative breast cancer model 4T1**

All mouse studies were approved by the Institutional Animal Care and Use Committee (IACUC) of The University of Texas MD Anderson Cancer Center before their initiation; animal care was provided according to IACUC standards, and all mice had been bred and were maintained in our own specific pathogen-free mouse colony. For tumor growth and survival studies, primary tumors were established by subcutaneous injection of 4T1 cells ( $5 \times 10^4$  in 100  $\mu$ L of sterile PBS) into the leg of syngeneic BALB/c mice (female, 12–16 weeks old). The mice were then given intraperitoneal injections of anti-PD-1 or control IgG antibodies (10 mg/kg) (Bio X cell), starting on day 4 after tumor cell inoculation and continuing twice per week for a total of 6 doses. Tumors were measured with calipers three times per week and recorded as tumor volume (in  $\text{mm}^3$ ) =  $\text{width}^2 \times \text{length} / 2$ . A Two-way RM ANOVA analysis of variance was done to compare tumor growth curves between groups. Mouse survival rates were analyzed by using the Kaplan–Meier method and compared with log-rank tests.

### **Depletion in vivo studies**

All mouse studies were approved by the Institutional Animal Care and Use Committee (IACUC) of The University of Texas MD Anderson Cancer Center before their initiation; animal care was provided according to IACUC standards, and all mice had been bred and were maintained in our own specific pathogen-free mouse colony. For tumor growth and survival studies, primary tumors were established by subcutaneous injection of 344SQR ctrl or 344SQR shBMP7 cells ( $0.25 \times 10^6$  in 100  $\mu$ L of sterile PBS) into the leg of syngeneic 129Sv/Ev mice (female, 12–16 weeks old). The

mice were then given intraperitoneal injections of anti-PD-1 (10 mg/kg), anti-CD4 (15 mg/kg), anti-F4/80 (5 mg/kg) or control IgG antibodies (10 mg/kg) (Bio X cell), starting on day 4 after tumor cell inoculation and continuing twice per week for a total of 4 doses. Tumors were measured with calipers three times per week and recorded as tumor volume (in mm<sup>3</sup>) = width<sup>2</sup> × length / 2. Tumor growth curves were compared with Two-way RM ANOVA.

### **TCGA data**

Analysis of TCGA data was performed in R (version 3.5.3; <http://www.r-project.org/>) and the statistical significance was defined as a  $P < 0.05$ . Clinical information for patients with lung adenocarcinoma was retrieved from the article “An Integrated TCGA Pan-Cancer Clinical Data Resource to Drive High-Quality Survival Outcome Analytics”, Cell. Volume 173 (<https://www.sciencedirect.com/science/article/pii/S0092867418302290?via%3Dihub>), but smoking status. The information regarding smoking status of these was retrieved from cBioPortal for Cancer Genomics (<http://www.cbioportal.org/>)(Ref: Cerami E et al, The cBio Cancer Genomics Portal: An Open Platform for Exploring Multidimensional Cancer Genomics Data, Cancer Discov. 2012 May;2(5):401-4. doi: 10.1158/2159-8290.CD-12-0095). Gene expression for BMP7 was downloaded as fragments per kilobase millions (FPKM) quantification mRNA-seq data from the Genomic Data Commons Data Portal (<https://portal.gdc.cancer.gov/>). The relationship between overall survival and covariates (mRNA expression levels and various patient data information) was examined using a Cox proportional hazard model (univariate followed by multivariate for the resulting significant variables). Results are presented in the tables bellow.

### **Der SD et al, LUAD cohort**

Survival analyses were performed in R (version 3.5.3; <http://www.r-project.org/>) and the statistical significance was defined as a  $P < 0.05$ . We retrieved from GEO repository microarray expression

(normalized log2) data BMP7 and clinical information for 181 Stage I and II NSCLC cases (GSE9893, ref: Der SD et al, Validation of a histology-independent prognostic gene signature for early-stage, non-small-cell lung cancer including stage IA patients, J Thorac Oncol. 2014 Jan;9(1):59-64. doi: 10.1097/JTO.000000000000042, PMID: 24305008). Univariate Cox proportional hazards model was fitted to evaluate the association between overall survival and covariates including BMP7 expression and available clinical variables. The variables significant in the univariate analysis were further examined in a multivariate analysis. We found BMP7 (21160\_at) to be an independent marker of poor overall survival. To visualize the result, we used the log-rank test to find the point (cut-off) with the most significant (lowest p-value) split in high vs low mRNA level groups. The cut-off is 0.65. Patients at risk in low and high mRNA groups at different time points are presented at the bottom of the graph, and the median survival in each group are presented in brackets.

### **Correlation Analysis**

The Spearman's rank-order correlation test was applied to measure the strength of association between gene expression levels in tumor samples.
