# Supplementary material for: Bone morphogenetic protein 7 promotes resistance to immunotherapy
Source: PubMed Central journal article supplement (PMC7519103; doi:10.1038/s41467-020-18617-z), 2020-09-24
Supplement: 41467_2020_18617_MOESM3_ESM.pdf [file 41467_2020_18617_MOESM3_ESM.pdf]

## **Description of Additional Supplementary Files**

File Name: Supplementary Data 1

Description: Reduced-representation bisulfite sequencing (RRBS) in 344SQP versus 344SQR tumors treated with anti-PD1

File Name: Supplementary Data 2

Description: Raw data for Figure 3
