# Supplementary material for: Bone morphogenetic protein 7 promotes resistance to immunotherapy
Source: PubMed Central journal article supplement (PMC7519103; doi:10.1038/s41467-020-18617-z), 2020-09-24
Supplement: 41467_2020_18617_MOESM4_ESM.pdf [file 41467_2020_18617_MOESM4_ESM.pdf]

**Supplementary data 1.** Reduced-representation bisulfite sequencing in 344SQP versus 344SQR tumors treated with anti-PD1.

For Methylation Calling analysis, the methylation percentages for CpG sites were calculated by the bismark\_methylation\_extractor script from Bismark and an in-house Perl script. The differential methylation on CpG sites was statistically assessed by R/Bioconductor package methylKit (version 0.9.5). The CpG sites with read coverage  $\geq 20$  in all the samples were qualified for the test. The significance of differential methylation on gene level was calculated using Stouffer's zscore method by combining all the qualified CpG sites inside each gene's promoter region (defined as -1000bp to +500 of TSS), and was corrected to FDR by Benjamini & Hochberg (BH) method.

| gene      | num_sites_in_promoter | meth_control | meth_treatment | meth_diff    | pvalue    | FDR       |
|-----------|-----------------------|--------------|----------------|--------------|-----------|-----------|
| Ppm1h     | 81                    | 10.10873295  | 2.179408451    | -7.9293245   | 0         | 0         |
| Cacna2d1  | 100                   | 39.76517923  | 20.45530044    | -19.30987878 | 0         | 0         |
| Gm23450   | 85                    | 21.15775033  | 7.867240004    | -13.29051032 | 0         | 0         |
| Kif21a    | 67                    | 23.34758317  | 2.213543368    | -21.1340398  | 0         | 0         |
| Adcy3     | 66                    | 29.1967836   | 12.15585854    | -17.04092506 | 0         | 0         |
| Lmo1      | 65                    | 32.23789966  | 15.70531019    | -16.53258947 | 0         | 0         |
| Ncam2     | 81                    | 12.20275002  | 3.563276109    | -8.639473907 | 0         | 0         |
| Slc2a13   | 57                    | 28.75605774  | 5.712374872    | -23.04368286 | 0         | 0         |
| Irx2      | 79                    | 53.80527918  | 34.96523774    | -18.84004144 | 0         | 0         |
| Ptprm     | 111                   | 7.163029664  | 1.43335333     | -5.729676334 | 0         | 0         |
| Atp9a     | 118                   | 11.22947198  | 2.029095799    | -9.200376185 | 0         | 0         |
| Mir8104   | 111                   | 9.612229918  | 2.380949527    | -7.231280391 | 0         | 0         |
| Fam196a   | 72                    | 37.94969671  | 14.79962411    | -23.1500726  | 0         | 0         |
| Gm3230    | 82                    | 10.12961789  | 1.119227518    | -9.010390373 | 0         | 0         |
| Kazn      | 96                    | 24.34131967  | 8.935775418    | -15.40554425 | 0         | 0         |
| Tmem200b  | 195                   | 20.12096797  | 42.21797333    | 22.09700536  | 0         | 0         |
| Raver2    | 85                    | 16.73783178  | 37.32816307    | 20.59033128  | 0         | 0         |
| Igf2bp1   | 80                    | 19.40391987  | 5.67095636     | -13.73296351 | 0         | 0         |
| 30182L06F | 64                    | 23.19194654  | 6.763023393    | -16.42892315 | 0         | 0         |
| Bmp7      | 61                    | 30.088685    | 6.517012078    | -23.57167292 | 0         | 0         |
| Shank3    | 135                   | 9.549899343  | 2.603902499    | -6.945996844 | 1.25E-301 | 8.75E-299 |
| Med12l    | 155                   | 25.24997482  | 36.11538724    | 10.86541243  | 3.74E-300 | 2.50E-297 |
| Fam69c    | 74                    | 20.71306285  | 9.275775339    | -11.43728751 | 5.66E-300 | 3.61E-297 |
| Mlf1      | 36                    | 21.86053942  | 5.877691088    | -15.98284833 | 4.08E-299 | 2.50E-296 |
| Plcl2     | 123                   | 7.013507747  | 1.330238083    | -5.683269664 | 1.23E-296 | 7.23E-294 |
| Fam65b    | 62                    | 17.84912364  | 5.579842708    | -12.26928093 | 5.99E-288 | 3.38E-285 |
| Adcy1     | 73                    | 28.15648465  | 12.78769409    | -15.36879056 | 3.62E-286 | 1.97E-283 |

|          |     |             |             |              |           |           |
|----------|-----|-------------|-------------|--------------|-----------|-----------|
| Mir6973b | 65  | 16.22101059 | 5.730171763 | -10.49083883 | 1.05E-285 | 5.52E-283 |
| Igf2     | 109 | 17.98229053 | 8.647108387 | -9.335182141 | 3.45E-285 | 1.75E-282 |
| Slc35f1  | 52  | 36.96327435 | 17.74789464 | -19.21537971 | 3.31E-280 | 1.62E-277 |
| Ppp1r9a  | 82  | 29.94690503 | 14.76951991 | -15.17738512 | 1.28E-272 | 6.05E-270 |
| Rims2    | 166 | 11.41744174 | 5.475814002 | -5.941627737 | 5.07E-263 | 2.33E-260 |
| Rbm20    | 93  | 26.90174192 | 41.63870623 | 14.73696431  | 1.59E-261 | 7.08E-259 |
| Limch1   | 51  | 24.05636212 | 9.003431048 | -15.05293108 | 1.15E-259 | 4.96E-257 |
| Igf2os   | 87  | 15.7863015  | 6.203250158 | -9.583051341 | 1.21E-258 | 5.05E-256 |
| Nim1k    | 37  | 19.81855412 | 2.973043956 | -16.84551017 | 1.61E-257 | 6.57E-255 |
| Zfp518b  | 77  | 31.03618277 | 47.4329252  | 16.39674243  | 1.71E-256 | 6.78E-254 |
| Abr      | 58  | 38.8192606  | 21.47154068 | -17.34771992 | 2.65E-253 | 1.02E-250 |
| Aff3     | 157 | 22.80399439 | 15.58865001 | -7.215344386 | 2.29E-252 | 8.63E-250 |
| Aldh1a2  | 128 | 27.08543708 | 40.199403   | 13.11396592  | 2.18E-250 | 8.01E-248 |
| Kcnn2    | 90  | 39.3422319  | 25.69279168 | -13.64944022 | 3.45E-245 | 1.23E-242 |
| P2rx5    | 40  | 13.570189   | 2.172622642 | -11.39756636 | 2.83E-239 | 9.89E-237 |
| Pmaip1   | 46  | 14.50173894 | 2.231462054 | -12.27027689 | 2.72E-231 | 9.29E-229 |
| B4galT4  | 62  | 14.75679194 | 3.739111454 | -11.01768049 | 1.04E-227 | 3.46E-225 |
| Satb1    | 150 | 27.92422694 | 19.53431857 | -8.389908371 | 2.05E-223 | 6.68E-221 |
| Fbxl7    | 105 | 48.90128127 | 37.82982639 | -11.07145489 | 1.45E-222 | 4.64E-220 |
| Grb10    | 114 | 48.60047164 | 63.90311495 | 15.30264331  | 6.97E-214 | 2.18E-211 |
| Vegfc    | 54  | 31.27397723 | 45.48578298 | 14.21180574  | 1.77E-213 | 5.40E-211 |
| Npas2    | 90  | 14.63681798 | 6.76421778  | -7.8726002   | 6.68E-210 | 2.00E-207 |
| B4galnt4 | 85  | 12.42873424 | 4.393135777 | -8.035598459 | 5.56E-209 | 1.63E-206 |
| Fam49a   | 49  | 10.19086194 | 1.455984581 | -8.73487736  | 6.17E-207 | 1.77E-204 |
| AW046200 | 45  | 15.94725266 | 4.350976195 | -11.59627646 | 4.64E-206 | 1.31E-203 |
| Dmrta1   | 37  | 20.47618842 | 44.25871918 | 23.78253076  | 2.08E-204 | 5.76E-202 |
| Dact1    | 89  | 14.87951013 | 7.857914744 | -7.02159539  | 1.62E-202 | 4.39E-200 |
| Ptprg    | 88  | 7.441147208 | 1.504240387 | -5.936906821 | 5.46E-202 | 1.46E-199 |
| Kcnab2   | 56  | 38.79783188 | 23.05141953 | -15.74641235 | 5.12E-201 | 1.34E-198 |
| Map9     | 60  | 8.458541979 | 20.31083104 | 11.85228906  | 1.22E-195 | 3.15E-193 |
| Nova1    | 124 | 20.86261419 | 14.37498032 | -6.487633872 | 1.05E-194 | 2.67E-192 |
| Trim47   | 73  | 8.182708103 | 1.77937163  | -6.403336472 | 1.50E-194 | 3.74E-192 |
| Kctd1    | 89  | 10.73363316 | 3.618905754 | -7.114727401 | 2.80E-194 | 6.84E-192 |
| Sema4f   | 43  | 15.94934672 | 5.11070337  | -10.83864335 | 2.97E-194 | 7.14E-192 |

|           |     |             |             |              |           |           |
|-----------|-----|-------------|-------------|--------------|-----------|-----------|
| Krba1     | 35  | 12.60174732 | 2.352763736 | -10.24898358 | 1.59E-193 | 3.77E-191 |
| Xylt1     | 87  | 34.34579734 | 23.53621831 | -10.80957903 | 1.87E-188 | 4.36E-186 |
| 30050F15F | 69  | 28.10644738 | 18.97961639 | -9.126830995 | 9.68E-188 | 2.22E-185 |
| Mapk8ip1  | 92  | 53.91094751 | 66.27500363 | 12.36405612  | 1.00E-186 | 2.27E-184 |
| Gsx1      | 74  | 21.43308943 | 11.83297616 | -9.600113268 | 8.63E-185 | 1.92E-182 |
| Dock3     | 83  | 11.21935228 | 22.62092613 | 11.40157385  | 1.20E-183 | 2.64E-181 |
| Slitrk5   | 47  | 29.89813925 | 47.05981622 | 17.16167696  | 7.66E-183 | 1.65E-180 |
| 30082K12F | 21  | 13.95503669 | 1.394569669 | -12.56046702 | 2.52E-182 | 5.35E-180 |
| Kcnk2     | 56  | 39.0416805  | 24.07784416 | -14.96383634 | 8.31E-176 | 1.74E-173 |
| Sfi1      | 30  | 84.71670077 | 80.21566903 | -4.501031748 | 6.25E-175 | 1.29E-172 |
| Rax       | 32  | 30.3689488  | 54.78914016 | 24.42019137  | 5.93E-174 | 1.21E-171 |
| Rprm      | 42  | 30.64532117 | 13.92850257 | -16.7168186  | 6.74E-174 | 1.36E-171 |
| Galnt9    | 73  | 18.6197997  | 33.63952003 | 15.01972033  | 1.74E-172 | 3.44E-170 |
| St8sia5   | 81  | 14.78098243 | 28.03493637 | 13.25395394  | 6.44E-172 | 1.26E-169 |
| Nlr1      | 56  | 9.573064821 | 2.263168243 | -7.309896578 | 4.00E-171 | 7.73E-169 |
| 30444P10F | 45  | 18.91796846 | 7.788278499 | -11.12968997 | 6.37E-168 | 1.21E-165 |
| Lppr5     | 58  | 47.2486515  | 31.41783384 | -15.83081766 | 2.82E-167 | 5.31E-165 |
| Ttyh3     | 68  | 30.41184718 | 43.99018122 | 13.57833404  | 7.64E-167 | 1.42E-164 |
| A4galt    | 68  | 45.17666974 | 30.96999658 | -14.20667316 | 9.15E-167 | 1.68E-164 |
| Gas6      | 36  | 12.90879114 | 4.005994758 | -8.902796377 | 1.48E-164 | 2.67E-162 |
| Zfp641    | 36  | 24.67287298 | 11.75666373 | -12.91620925 | 3.02E-160 | 5.41E-158 |
| H2-Q6     | 13  | 21.80383229 | 6.984766812 | -14.81906548 | 1.03E-159 | 1.82E-157 |
| Dnajc6    | 93  | 32.62515894 | 46.46469177 | 13.83953282  | 4.83E-159 | 8.44E-157 |
| Syde2     | 161 | 7.112759622 | 13.11922778 | 6.006468157  | 1.06E-157 | 1.83E-155 |
| Rap1gap   | 62  | 18.34414196 | 9.25812301  | -9.086018952 | 4.28E-157 | 7.30E-155 |
| Mmp2      | 41  | 37.37962315 | 23.1472109  | -14.23241225 | 7.44E-153 | 1.26E-150 |
| Lifr      | 80  | 5.181614328 | 1.143972243 | -4.037642085 | 1.20E-152 | 2.01E-150 |
| Unc5a     | 116 | 21.12656396 | 15.20872779 | -5.917836168 | 2.62E-151 | 4.31E-149 |
| Bmp8b     | 61  | 52.85390313 | 67.53208637 | 14.67818324  | 1.02E-150 | 1.66E-148 |
| Kcnk4     | 25  | 44.9366223  | 68.11734957 | 23.18072727  | 1.47E-150 | 2.37E-148 |
| Foxe1     | 58  | 53.65274906 | 68.94672712 | 15.29397806  | 1.32E-149 | 2.10E-147 |
| Prkd1     | 70  | 9.880890046 | 3.038855559 | -6.842034487 | 1.97E-149 | 3.10E-147 |
| Cpeb1     | 123 | 14.49105914 | 22.13561828 | 7.644559143  | 2.14E-149 | 3.35E-147 |
| Nlgn3     | 15  | 46.13601234 | 17.40864037 | -28.72737197 | 7.43E-148 | 1.15E-145 |

|          |     |             |             |              |           |           |
|----------|-----|-------------|-------------|--------------|-----------|-----------|
| Lin7a    | 21  | 27.5375621  | 10.35673952 | -17.18082257 | 9.98E-148 | 1.53E-145 |
| Otud1    | 118 | 23.82431804 | 19.28314521 | -4.541172833 | 2.29E-146 | 3.46E-144 |
| Pclo     | 76  | 25.26600892 | 15.929757   | -9.336251925 | 1.70E-145 | 2.54E-143 |
| Jazf1    | 137 | 11.99586659 | 7.388296729 | -4.607569858 | 8.03E-145 | 1.19E-142 |
| Id4      | 135 | 49.95326124 | 59.85735372 | 9.904092477  | 8.94E-143 | 1.31E-140 |
| Sdk1     | 182 | 46.10134621 | 54.2868068  | 8.185460586  | 3.01E-142 | 4.38E-140 |
| Ror2     | 88  | 35.64283839 | 46.88991892 | 11.24708053  | 1.61E-141 | 2.32E-139 |
| Slc34a2  | 27  | 17.86186925 | 5.856039374 | -12.00582988 | 5.01E-140 | 7.14E-138 |
| Zfp704   | 73  | 6.51897495  | 2.446674465 | -4.072300485 | 7.49E-140 | 1.06E-137 |
| Zbtb10   | 114 | 10.18212934 | 5.561998972 | -4.620130372 | 2.03E-139 | 2.84E-137 |
| Tub      | 79  | 19.32827542 | 11.24755832 | -8.080717101 | 2.09E-139 | 2.89E-137 |
| Palm3    | 29  | 46.29095632 | 68.71935749 | 22.42840117  | 2.55E-139 | 3.50E-137 |
| Dclk1    | 17  | 23.5221403  | 5.524629997 | -17.9975103  | 5.63E-139 | 7.65E-137 |
| Npr3     | 92  | 19.9296407  | 9.530779568 | -10.39886113 | 1.08E-138 | 1.45E-136 |
| Prkg1    | 67  | 30.65880134 | 20.90998523 | -9.748816108 | 1.41E-138 | 1.88E-136 |
| Tlr2     | 20  | 21.49320065 | 5.409083786 | -16.08411687 | 2.10E-138 | 2.77E-136 |
| Galnt7   | 68  | 9.010526554 | 3.975914327 | -5.034612226 | 1.19E-137 | 1.56E-135 |
| Dsc2     | 25  | 28.04893222 | 9.528433801 | -18.52049842 | 1.60E-137 | 2.08E-135 |
| Zyg11a   | 62  | 34.47752949 | 50.43059391 | 15.95306442  | 2.17E-136 | 2.79E-134 |
| Pou3f1   | 122 | 53.62082717 | 64.19914107 | 10.5783139   | 7.73E-136 | 9.86E-134 |
| Prdm11   | 120 | 7.039825027 | 1.182479086 | -5.857345941 | 1.55E-135 | 1.96E-133 |
| Osbp1a   | 79  | 21.88466151 | 17.28701313 | -4.597648389 | 4.36E-135 | 5.47E-133 |
| Nphp4    | 48  | 39.49030772 | 25.40335656 | -14.08695116 | 1.95E-134 | 2.43E-132 |
| Slc5a5   | 35  | 48.52985073 | 65.73629133 | 17.20644059  | 5.18E-133 | 6.39E-131 |
| Zic3     | 43  | 36.86236006 | 18.22328267 | -18.63907739 | 2.59E-132 | 3.17E-130 |
| Scn8a    | 142 | 26.43892893 | 33.52047526 | 7.081546334  | 1.83E-131 | 2.22E-129 |
| Nptx2    | 109 | 51.23053992 | 62.05743121 | 10.82689129  | 1.97E-131 | 2.36E-129 |
| Dlx3     | 25  | 17.49819777 | 2.055967329 | -15.44223045 | 2.39E-131 | 2.85E-129 |
| Ugt8a    | 101 | 49.00752509 | 57.57495415 | 8.56742906   | 1.05E-130 | 1.24E-128 |
| Hotairm1 | 25  | 18.69559045 | 6.806861757 | -11.88872869 | 1.70E-130 | 1.99E-128 |
| Fam189a1 | 145 | 42.14248744 | 34.22924498 | -7.913242462 | 2.70E-130 | 3.15E-128 |
| Grip1    | 108 | 13.70051323 | 8.376476565 | -5.324036668 | 4.03E-129 | 4.66E-127 |
| Cecr6    | 91  | 8.030178969 | 3.266279006 | -4.763899963 | 2.89E-128 | 3.31E-126 |
| Maneal   | 113 | 25.03953794 | 34.41476755 | 9.37522961   | 5.34E-128 | 6.07E-126 |

|            |     |             |             |              |           |           |
|------------|-----|-------------|-------------|--------------|-----------|-----------|
| Mtmr7      | 51  | 31.82012809 | 45.97845543 | 14.15832734  | 7.34E-128 | 8.29E-126 |
| Reln       | 134 | 57.69096534 | 66.44463439 | 8.75366905   | 2.59E-126 | 2.90E-124 |
| Rab42      | 17  | 3.617393581 | 26.06181841 | 22.44442483  | 1.33E-125 | 1.48E-123 |
| Cacnb4     | 47  | 20.00760004 | 32.40712151 | 12.39952146  | 2.47E-125 | 2.73E-123 |
| Ccser1     | 71  | 30.82871045 | 20.86351554 | -9.965194908 | 7.38E-124 | 8.08E-122 |
| '30090H04F | 26  | 15.89424972 | 3.486271907 | -12.40797781 | 2.13E-123 | 2.31E-121 |
| Mgll       | 79  | 19.87840928 | 32.01972369 | 12.14131442  | 2.57E-123 | 2.78E-121 |
| H2-Q9      | 15  | 20.22721489 | 4.050417837 | -16.17679706 | 3.73E-123 | 4.00E-121 |
| Cpne8      | 39  | 7.050915815 | 2.107292846 | -4.943622969 | 1.81E-122 | 1.93E-120 |
| Msx3       | 36  | 19.57441732 | 7.458063796 | -12.11635353 | 2.08E-122 | 2.20E-120 |
| Chrm3      | 38  | 23.70237    | 12.7208403  | -10.98152969 | 1.30E-120 | 1.37E-118 |
| Sall3      | 175 | 42.60436309 | 51.64630684 | 9.041943751  | 5.39E-120 | 5.61E-118 |
| Mir1247    | 87  | 22.87108007 | 35.49581957 | 12.6247395   | 1.02E-119 | 1.06E-117 |
| Nkain3     | 45  | 24.9102855  | 15.44920712 | -9.461078379 | 1.07E-118 | 1.10E-116 |
| Foxe3      | 68  | 25.32949975 | 15.61533844 | -9.714161312 | 1.41E-117 | 1.43E-115 |
| B3gat2     | 57  | 23.3143972  | 15.08879954 | -8.225597659 | 2.39E-116 | 2.42E-114 |
| Ttc22      | 27  | 33.11685263 | 14.66938383 | -18.4474688  | 7.60E-116 | 7.64E-114 |
| Gkap1      | 172 | 3.96045441  | 1.08442586  | -2.87602855  | 1.11E-114 | 1.11E-112 |
| Adra2a     | 62  | 7.173551647 | 14.47582214 | 7.30227049   | 2.97E-114 | 2.95E-112 |
| Sfrp1      | 64  | 32.22959051 | 45.62765077 | 13.39806026  | 6.13E-114 | 6.04E-112 |
| Ngef       | 109 | 6.931408637 | 3.075357967 | -3.85605067  | 1.46E-113 | 1.43E-111 |
| Arhgef26   | 51  | 6.619321398 | 1.669774113 | -4.949547285 | 2.02E-113 | 1.96E-111 |
| Mall       | 15  | 18.48878145 | 2.048136078 | -16.44064537 | 2.06E-113 | 1.98E-111 |
| Tnfrsf19   | 28  | 19.1669753  | 7.492268297 | -11.674707   | 3.57E-113 | 3.42E-111 |
| Meis2      | 52  | 7.244895878 | 1.293899443 | -5.950996434 | 6.11E-113 | 5.82E-111 |
| Camk1d     | 92  | 11.21382646 | 5.933563101 | -5.280263356 | 8.22E-113 | 7.78E-111 |
| Cacna2d3   | 113 | 18.10813686 | 11.59614438 | -6.511992479 | 7.92E-112 | 7.45E-110 |
| Ccna1      | 30  | 23.74727892 | 9.851048183 | -13.89623074 | 8.31E-112 | 7.77E-110 |
| Rrad       | 12  | 29.76901148 | 10.37618423 | -19.39282726 | 2.59E-111 | 2.41E-109 |
| Bean1      | 59  | 6.440664284 | 1.531258383 | -4.909405901 | 2.67E-111 | 2.46E-109 |
| Ampd3      | 18  | 45.34576372 | 25.2321049  | -20.11365881 | 4.31E-111 | 3.95E-109 |
| Fgf2       | 66  | 8.546977763 | 4.136540904 | -4.410436859 | 7.69E-111 | 7.01E-109 |
| Eya2       | 80  | 11.779166   | 19.58757628 | 7.808410284  | 6.70E-108 | 6.07E-106 |
| Htr1d      | 89  | 9.184359306 | 4.977515403 | -4.206843904 | 2.29E-107 | 2.06E-105 |

|            |     |             |             |              |           |           |
|------------|-----|-------------|-------------|--------------|-----------|-----------|
| Lypd6b     | 48  | 17.48424352 | 8.242635956 | -9.241607563 | 3.07E-107 | 2.74E-105 |
| Rac3       | 89  | 11.53279052 | 4.619888542 | -6.912901978 | 3.80E-107 | 3.38E-105 |
| Fam13c     | 26  | 19.19579942 | 7.437005352 | -11.75879407 | 1.37E-106 | 1.21E-104 |
| Igsf9b     | 26  | 17.26017387 | 4.55119745  | -12.70897642 | 3.53E-106 | 3.10E-104 |
| Nav1       | 16  | 20.85673495 | 47.31106702 | 26.45433206  | 3.76E-106 | 3.29E-104 |
| Hoxa4      | 92  | 46.51864611 | 56.63729892 | 10.11865281  | 6.31E-106 | 5.47E-104 |
| Abca14     | 13  | 27.08541768 | 8.909865564 | -18.17555211 | 1.05E-105 | 9.08E-104 |
| Afap112    | 47  | 8.841743588 | 2.715645753 | -6.126097835 | 1.54E-105 | 1.32E-103 |
| Lmx1b      | 121 | 38.41060105 | 46.93028706 | 8.519686012  | 4.48E-105 | 3.83E-103 |
| Adcy5      | 162 | 17.39503058 | 24.48189046 | 7.086859874  | 7.71E-105 | 6.54E-103 |
| Dab1       | 68  | 48.67028042 | 60.7161277  | 12.04584729  | 1.87E-104 | 1.57E-102 |
| Fam83f     | 38  | 52.96191578 | 38.13619373 | -14.82572205 | 1.55E-103 | 1.30E-101 |
| Mark1      | 174 | 13.30272603 | 10.4600144  | -2.842711631 | 1.62E-103 | 1.35E-101 |
| Celsr3     | 59  | 22.61273472 | 33.97081679 | 11.35808206  | 2.07E-103 | 1.71E-101 |
| Trhde      | 113 | 52.77299474 | 61.23384077 | 8.460846035  | 3.57E-103 | 2.94E-101 |
| Tbc1d30    | 54  | 15.23308115 | 8.283285678 | -6.949795467 | 4.57E-103 | 3.75E-101 |
| Gsc        | 52  | 32.07095484 | 22.14572346 | -9.925231377 | 2.35E-102 | 1.92E-100 |
| Gas1       | 60  | 48.73513047 | 59.69066402 | 10.95553355  | 4.39E-102 | 3.56E-100 |
| Ctnnd2     | 127 | 25.78583522 | 19.8666499  | -5.919185326 | 6.67E-101 | 5.38E-99  |
| Pde8b      | 86  | 18.59876014 | 12.13366589 | -6.465094248 | 1.27E-100 | 1.02E-98  |
| Nr2f1      | 70  | 5.586469117 | 1.56613982  | -4.020329297 | 1.33E-100 | 1.06E-98  |
| Kcnj8      | 23  | 22.10290683 | 8.383595298 | -13.71931153 | 5.38E-100 | 4.26E-98  |
| 700112E06F | 28  | 11.41196148 | 2.819573584 | -8.592387892 | 8.06E-100 | 6.36E-98  |
| Ascl5      | 32  | 11.73421705 | 3.463333222 | -8.270883831 | 1.36E-99  | 1.06E-97  |
| Lbx1       | 94  | 36.85797116 | 45.56032159 | 8.702350437  | 1.99E-99  | 1.55E-97  |
| Slc18a2    | 25  | 28.44613575 | 15.41769147 | -13.02844428 | 7.72E-98  | 6.00E-96  |
| 700086L19F | 28  | 16.34593855 | 9.46576691  | -6.880171642 | 2.61E-97  | 2.02E-95  |
| Fam109b    | 23  | 18.85118139 | 6.822573423 | -12.02860797 | 3.31E-97  | 2.54E-95  |
| Obsl1      | 53  | 14.9397333  | 25.50195557 | 10.56222227  | 1.15E-96  | 8.81E-95  |
| Zdbf2      | 127 | 56.28908782 | 64.54665414 | 8.257566316  | 1.40E-96  | 1.07E-94  |
| Ptprz1     | 33  | 26.06105914 | 14.7330573  | -11.32800185 | 1.70E-96  | 1.28E-94  |
| Dio3       | 80  | 24.92920057 | 37.80756638 | 12.87836581  | 1.01E-95  | 7.63E-94  |
| Hs3st2     | 80  | 56.97115364 | 66.2031502  | 9.231996567  | 1.04E-95  | 7.77E-94  |
| Kctd17     | 29  | 10.07436857 | 2.469038292 | -7.605330278 | 1.81E-95  | 1.34E-93  |

|            |     |             |             |              |          |          |
|------------|-----|-------------|-------------|--------------|----------|----------|
| Hoxa1      | 12  | 15.3309757  | 3.347437119 | -11.98353858 | 2.05E-95 | 1.52E-93 |
| Ust        | 37  | 10.78574037 | 3.677529535 | -7.108210836 | 8.74E-95 | 6.44E-93 |
| Plekhg1    | 26  | 18.12151049 | 3.263651582 | -14.8578589  | 1.04E-94 | 7.65E-93 |
| Hs6st3     | 159 | 51.90498547 | 58.46473645 | 6.559750984  | 2.67E-94 | 1.95E-92 |
| Fgf8       | 61  | 26.87046166 | 37.20179732 | 10.33133566  | 2.88E-94 | 2.09E-92 |
| Ptprb      | 17  | 22.80764632 | 7.650695434 | -15.15695089 | 7.72E-94 | 5.58E-92 |
| Syng3      | 28  | 11.29741201 | 3.645925691 | -7.651486317 | 1.37E-93 | 9.83E-92 |
| 130021I20R | 108 | 39.22535002 | 47.84387218 | 8.61852216   | 1.98E-93 | 1.42E-91 |
| Elavl2     | 132 | 37.45201212 | 46.5346414  | 9.082629283  | 2.34E-93 | 1.67E-91 |
| Barhl2     | 116 | 52.68640486 | 60.64977629 | 7.963371428  | 2.45E-93 | 1.73E-91 |
| Lmx1a      | 63  | 26.73606235 | 19.49072117 | -7.245341181 | 1.35E-92 | 9.56E-91 |
| Hey2       | 40  | 7.215796439 | 20.13520921 | 12.91941277  | 4.68E-92 | 3.29E-90 |
| Fam19a5    | 363 | 64.80597935 | 69.11164366 | 4.305664302  | 5.57E-91 | 3.89E-89 |
| Gstp1      | 13  | 11.42801278 | 1.984601121 | -9.443411663 | 1.47E-90 | 1.02E-88 |
| Hoxd8      | 144 | 43.35788807 | 50.75130958 | 7.393421507  | 3.00E-90 | 2.07E-88 |
| Dscam      | 104 | 18.85778189 | 12.47877321 | -6.379008684 | 7.27E-90 | 5.01E-88 |
| Smoc2      | 53  | 19.22931594 | 11.01557075 | -8.213745191 | 1.48E-89 | 1.02E-87 |
| Syn2       | 69  | 20.47178756 | 30.61771643 | 10.14592888  | 1.53E-89 | 1.05E-87 |
| Gm11837    | 99  | 19.16133345 | 14.24859108 | -4.912742377 | 1.90E-89 | 1.29E-87 |
| Agtr1b     | 8   | 45.01523817 | 20.18630548 | -24.82893269 | 2.01E-89 | 1.36E-87 |
| Runx1t1    | 126 | 26.63027159 | 21.02274958 | -5.607522011 | 3.91E-89 | 2.63E-87 |
| Gm11549    | 40  | 25.90662972 | 36.70198989 | 10.79536017  | 4.34E-89 | 2.91E-87 |
| 730020E08F | 91  | 28.67703339 | 21.23105554 | -7.445977849 | 6.86E-89 | 4.58E-87 |
| Foxi2      | 31  | 38.97071471 | 26.32659619 | -12.64411852 | 2.28E-88 | 1.52E-86 |
| Mal2       | 35  | 8.405938852 | 2.281553358 | -6.124385494 | 4.12E-88 | 2.72E-86 |
| Irf5       | 117 | 7.231350988 | 3.695816358 | -3.53553463  | 9.97E-88 | 6.56E-86 |
| B3glct     | 46  | 1.225196717 | 4.527199726 | 3.302003009  | 1.91E-87 | 1.25E-85 |
| Ntf3       | 21  | 29.7220543  | 14.72435295 | -14.99770136 | 3.58E-87 | 2.33E-85 |
| Pik3r5     | 22  | 12.2319647  | 2.023385072 | -10.20857963 | 3.70E-87 | 2.41E-85 |
| Elmod1     | 26  | 22.65728953 | 40.23650996 | 17.57922043  | 7.08E-86 | 4.57E-84 |
| Chrn2      | 26  | 22.70734995 | 12.08637585 | -10.6209741  | 3.39E-85 | 2.18E-83 |
| AI839979   | 10  | 17.24209257 | 3.454738593 | -13.78735398 | 7.31E-85 | 4.69E-83 |
| Dio3os     | 23  | 22.27115758 | 38.41309134 | 16.14193376  | 8.73E-85 | 5.57E-83 |
| Rasl1a     | 55  | 7.909498517 | 2.422331468 | -5.487167049 | 2.34E-84 | 1.49E-82 |

|            |     |             |             |              |          |          |
|------------|-----|-------------|-------------|--------------|----------|----------|
| Hoxc8      | 35  | 43.19239511 | 28.941502   | -14.25089311 | 6.30E-84 | 3.99E-82 |
| Ppp1r36    | 30  | 34.27441427 | 48.57838954 | 14.30397527  | 6.66E-84 | 4.19E-82 |
| Ttpa       | 45  | 21.71499666 | 13.82530111 | -7.889695546 | 2.90E-83 | 1.82E-81 |
| Prkg2      | 71  | 11.15131855 | 4.636920796 | -6.514397751 | 6.81E-83 | 4.25E-81 |
| Gabbr2     | 124 | 27.2367571  | 21.94579384 | -5.290963265 | 1.57E-82 | 9.76E-81 |
| i30059014F | 70  | 18.80239289 | 11.81699636 | -6.985396536 | 9.37E-82 | 5.80E-80 |
| Gli3       | 128 | 8.126366285 | 4.670284307 | -3.456081978 | 1.23E-81 | 7.60E-80 |
| Ptpn20     | 16  | 80.56214658 | 60.76905295 | -19.79309363 | 1.73E-81 | 1.06E-79 |
| Ttc34      | 74  | 26.27280554 | 36.56951627 | 10.29671073  | 2.38E-81 | 1.46E-79 |
| Prok2      | 33  | 24.53992425 | 14.58448273 | -9.955441521 | 1.28E-80 | 7.77E-79 |
| Ncmap      | 30  | 14.9716586  | 7.246494264 | -7.725164337 | 1.49E-80 | 9.03E-79 |
| Neil2      | 14  | 21.15631975 | 41.54613165 | 20.3898119   | 1.61E-80 | 9.72E-79 |
| Zic5       | 13  | 11.50078596 | 1.170029856 | -10.3307561  | 1.67E-80 | 1.00E-78 |
| Chpt1      | 63  | 6.480319196 | 13.14809963 | 6.667780432  | 2.45E-80 | 1.47E-78 |
| Cecr2      | 172 | 4.31885143  | 1.89520975  | -2.42364168  | 4.68E-80 | 2.79E-78 |
| Cnm1       | 115 | 22.91515993 | 29.81892057 | 6.903760645  | 6.07E-80 | 3.61E-78 |
| Evc        | 54  | 37.30245675 | 27.84004098 | -9.462415777 | 1.10E-79 | 6.48E-78 |
| Stk39      | 92  | 9.431879258 | 5.02894567  | -4.402933588 | 1.87E-79 | 1.10E-77 |
| Klhl1      | 8   | 46.32792414 | 20.68558555 | -25.64233859 | 5.61E-79 | 3.29E-77 |
| Irx1       | 80  | 29.74003571 | 21.92766854 | -7.812367175 | 1.83E-78 | 1.07E-76 |
| Gm16793    | 48  | 37.98714282 | 28.7968447  | -9.190298124 | 2.26E-78 | 1.32E-76 |
| En2        | 89  | 16.17775607 | 23.95494663 | 7.77719056   | 2.46E-78 | 1.43E-76 |
| Stox2      | 30  | 37.75377733 | 23.85528708 | -13.89849025 | 2.53E-78 | 1.46E-76 |
| Chst10     | 35  | 23.04324796 | 35.72687072 | 12.68362276  | 2.61E-78 | 1.50E-76 |
| Bspry      | 30  | 21.67463643 | 10.41236785 | -11.26226858 | 2.64E-78 | 1.51E-76 |
| Calcr      | 27  | 23.40299224 | 11.79948156 | -11.60351068 | 3.03E-78 | 1.73E-76 |
| Lrrc3      | 33  | 21.31942348 | 36.10261685 | 14.78319337  | 3.07E-78 | 1.75E-76 |
| Htr1b      | 32  | 2.808679148 | 12.18324891 | 9.374569759  | 3.32E-78 | 1.88E-76 |
| Rprml      | 52  | 15.02994678 | 7.594041486 | -7.435905292 | 3.07E-77 | 1.73E-75 |
| Zfp37      | 36  | 7.086637814 | 1.695366221 | -5.391271594 | 4.02E-77 | 2.26E-75 |
| Pard3b     | 114 | 4.135335969 | 1.702006459 | -2.433329509 | 1.16E-76 | 6.52E-75 |
| Galnt13    | 103 | 43.48195728 | 50.93725822 | 7.455300944  | 1.24E-76 | 6.90E-75 |
| Tgfb3      | 27  | 7.665819144 | 1.381211641 | -6.284607502 | 2.17E-76 | 1.20E-74 |
| Col15a1    | 43  | 16.01367677 | 7.609070563 | -8.404606212 | 2.23E-76 | 1.23E-74 |



|            |     |             |             |              |          |          |
|------------|-----|-------------|-------------|--------------|----------|----------|
| Pus3       | 38  | 14.43740931 | 6.200255314 | -8.237153992 | 2.94E-76 | 1.62E-74 |
| Hpca       | 66  | 17.11719463 | 10.77541201 | -6.341782618 | 4.48E-76 | 2.46E-74 |
| Msi1       | 98  | 6.729321704 | 3.129576321 | -3.599745383 | 9.47E-75 | 5.19E-73 |
| Mir8092    | 17  | 12.8495841  | 3.402658244 | -9.446925855 | 1.01E-74 | 5.51E-73 |
| Pamr1      | 7   | 29.04202485 | 6.395130661 | -22.64689419 | 2.46E-74 | 1.33E-72 |
| Lpar3      | 73  | 26.01617188 | 33.1794261  | 7.163254224  | 7.04E-74 | 3.81E-72 |
| Grik3      | 133 | 54.79416145 | 60.74277141 | 5.948609963  | 1.00E-73 | 5.41E-72 |
| Lgi2       | 49  | 7.61517455  | 2.337352814 | -5.277821735 | 1.60E-73 | 8.62E-72 |
| Penk       | 50  | 12.32957315 | 5.123523957 | -7.206049195 | 2.62E-73 | 1.40E-71 |
| Snord37    | 6   | 70.05742106 | 35.26058863 | -34.79683243 | 2.93E-73 | 1.56E-71 |
| Ddx43      | 56  | 37.88720157 | 48.61894402 | 10.73174244  | 2.97E-73 | 1.58E-71 |
| Clic6      | 8   | 15.59110758 | 52.281968   | 36.69086042  | 3.24E-73 | 1.71E-71 |
| Zdhhc25    | 22  | 83.87993789 | 69.91403753 | -13.96590035 | 3.75E-73 | 1.98E-71 |
| Kcnk9      | 71  | 58.8479419  | 67.23713438 | 8.389192471  | 4.82E-73 | 2.53E-71 |
| Nlrp5-ps   | 112 | 58.38283232 | 65.21176617 | 6.828933856  | 1.67E-72 | 8.76E-71 |
| I30019B13F | 10  | 23.05789646 | 56.24546643 | 33.18756997  | 2.37E-72 | 1.24E-70 |
| Espnl      | 10  | 29.29152979 | 13.62613095 | -15.66539884 | 2.82E-72 | 1.47E-70 |
| Gldc       | 31  | 25.79891127 | 37.64606931 | 11.84715804  | 3.52E-72 | 1.82E-70 |
| Fzd10      | 71  | 60.16917779 | 68.71353573 | 8.544357938  | 6.69E-72 | 3.46E-70 |
| Kcnh1      | 66  | 8.326459215 | 3.677399182 | -4.649060033 | 9.56E-72 | 4.92E-70 |
| Trank1     | 94  | 43.78584207 | 53.36705432 | 9.581212242  | 1.25E-71 | 6.44E-70 |
| Tspyl5     | 43  | 20.80626933 | 10.70231689 | -10.10395244 | 1.50E-71 | 7.65E-70 |
| Fam169a    | 148 | 4.75165452  | 2.012993455 | -2.738661065 | 1.64E-71 | 8.37E-70 |
| Ntng1      | 9   | 59.30074154 | 20.04664708 | -39.25409446 | 1.95E-71 | 9.89E-70 |
| Scrn1      | 41  | 4.835150107 | 1.388263217 | -3.44688689  | 2.17E-71 | 1.10E-69 |
| Rpp25      | 62  | 10.64958799 | 7.918344126 | -2.731243866 | 2.56E-71 | 1.29E-69 |
| Mir6537    | 31  | 79.94237953 | 63.85256976 | -16.08980978 | 2.96E-71 | 1.49E-69 |
| Vstm2b     | 72  | 48.22285423 | 56.11167044 | 7.888816208  | 3.66E-71 | 1.83E-69 |
| Slc27a3    | 54  | 53.46883096 | 62.16780827 | 8.698977307  | 4.60E-71 | 2.30E-69 |
| Dapk1      | 82  | 39.03497141 | 31.40580567 | -7.629165742 | 7.40E-71 | 3.68E-69 |
| Mir193b    | 18  | 11.40911748 | 2.02697954  | -9.38213794  | 2.40E-70 | 1.19E-68 |
| Shisa3     | 57  | 29.58046613 | 20.05861788 | -9.521848249 | 2.66E-70 | 1.31E-68 |
| Npas1      | 27  | 22.08906787 | 39.26425874 | 17.17519087  | 4.87E-70 | 2.40E-68 |
| Lhfp14     | 57  | 21.973942   | 14.56378928 | -7.410152715 | 6.28E-70 | 3.08E-68 |

|            |     |             |             |              |          |          |
|------------|-----|-------------|-------------|--------------|----------|----------|
| Acan       | 36  | 8.478941059 | 1.992819389 | -6.48612167  | 6.90E-70 | 3.38E-68 |
| Gmnc       | 8   | 24.05590469 | 7.437472547 | -16.61843214 | 1.05E-69 | 5.10E-68 |
| Tlx3       | 101 | 53.26446571 | 61.36560368 | 8.101137967  | 1.32E-69 | 6.40E-68 |
| Al854517   | 112 | 35.63037386 | 42.6487633  | 7.018389449  | 1.47E-69 | 7.10E-68 |
| Sv2c       | 57  | 16.27667218 | 9.19562753  | -7.081044654 | 1.84E-69 | 8.90E-68 |
| Homer2     | 95  | 4.254647508 | 1.776668202 | -2.477979306 | 3.15E-69 | 1.52E-67 |
| Osr1       | 5   | 42.89682371 | 4.00103213  | -38.89579158 | 3.19E-69 | 1.53E-67 |
| Gpc5       | 28  | 21.26354165 | 33.30594171 | 12.04240006  | 4.37E-69 | 2.09E-67 |
| Radil      | 21  | 7.14869711  | 21.30824332 | 14.1595462   | 5.94E-69 | 2.83E-67 |
| Ryr2       | 41  | 15.38833179 | 8.568668344 | -6.819663448 | 6.41E-69 | 3.04E-67 |
| Gm5089     | 25  | 13.08736878 | 2.576209921 | -10.51115886 | 7.42E-69 | 3.51E-67 |
| Nkx6-2     | 69  | 56.44787162 | 66.49047213 | 10.04260051  | 1.24E-68 | 5.86E-67 |
| Dlx6       | 30  | 24.03328942 | 13.62154938 | -10.41174004 | 1.36E-68 | 6.38E-67 |
| Fbll1      | 30  | 43.2342451  | 58.54136771 | 15.30712261  | 2.01E-68 | 9.44E-67 |
| Slc35f2    | 10  | 11.83176631 | 0.994353505 | -10.8374128  | 3.46E-68 | 1.62E-66 |
| Kcnd3      | 98  | 38.2463561  | 33.48953195 | -4.756824147 | 3.91E-68 | 1.82E-66 |
| Rasef      | 45  | 6.14245496  | 2.416701648 | -3.725753312 | 4.24E-68 | 1.96E-66 |
| Gm11240    | 45  | 6.14245496  | 2.416701648 | -3.725753312 | 4.24E-68 | 1.96E-66 |
| Mir7656    | 6   | 85.14294056 | 58.09969197 | -27.04324859 | 2.12E-67 | 9.80E-66 |
| Dyrk1b     | 64  | 2.563296939 | 6.263952813 | 3.700655873  | 2.26E-67 | 1.04E-65 |
| Barx2      | 65  | 28.92182585 | 23.43564184 | -5.486184015 | 8.38E-67 | 3.84E-65 |
| Ddah2      | 13  | 37.05211723 | 15.98327153 | -21.0688457  | 1.17E-66 | 5.36E-65 |
| Kndc1      | 25  | 40.47240126 | 27.47072186 | -13.0016794  | 1.23E-66 | 5.60E-65 |
| Trim9      | 24  | 14.30342493 | 5.687529339 | -8.615895589 | 1.32E-66 | 5.98E-65 |
| Lepr       | 14  | 22.54492796 | 5.004010186 | -17.54091777 | 1.50E-66 | 6.81E-65 |
| J30025P21F | 57  | 18.40714534 | 27.20770091 | 8.800555571  | 1.98E-66 | 8.95E-65 |
| Chdh       | 40  | 15.79903007 | 8.541046304 | -7.257983769 | 2.18E-66 | 9.83E-65 |
| Foxd3      | 45  | 54.58637874 | 66.44492991 | 11.85855117  | 4.69E-66 | 2.11E-64 |
| Cercam     | 27  | 14.89730294 | 30.93584311 | 16.03854017  | 4.86E-66 | 2.18E-64 |
| Ephx2      | 18  | 11.18591081 | 3.279033095 | -7.906877711 | 6.66E-66 | 2.97E-64 |
| Cacna1h    | 91  | 3.214999385 | 7.241438899 | 4.026439514  | 7.25E-66 | 3.22E-64 |
| Prr16      | 52  | 34.27593987 | 23.92964858 | -10.3462913  | 8.17E-66 | 3.62E-64 |
| Pcsk2      | 51  | 27.3805493  | 19.65691064 | -7.723638662 | 2.36E-65 | 1.04E-63 |
| Kbtbd13    | 16  | 18.69656073 | 35.92606263 | 17.22950189  | 2.73E-65 | 1.20E-63 |

|          |     |             |             |              |          |          |
|----------|-----|-------------|-------------|--------------|----------|----------|
| Pld5     | 39  | 46.45871632 | 59.38684931 | 12.92813299  | 3.53E-65 | 1.55E-63 |
| Marveld2 | 69  | 6.119263114 | 2.709237332 | -3.410025782 | 4.54E-65 | 1.99E-63 |
| Nell1    | 47  | 36.9703136  | 27.51917153 | -9.451142071 | 8.68E-65 | 3.79E-63 |
| Lhfpl2   | 68  | 4.696226283 | 1.945357095 | -2.750869187 | 8.92E-65 | 3.89E-63 |
| Phox2a   | 37  | 38.62378973 | 50.47690378 | 11.85311405  | 1.44E-64 | 6.26E-63 |
| Lrrtm3   | 8   | 29.91033675 | 8.194564567 | -21.71577218 | 1.56E-64 | 6.74E-63 |
| Myrip    | 91  | 57.09861795 | 64.4626143  | 7.363996345  | 2.20E-64 | 9.47E-63 |
| Zpbp     | 18  | 43.88248169 | 63.59510465 | 19.71262296  | 2.28E-64 | 9.82E-63 |
| Lhb      | 29  | 66.79474951 | 50.87948023 | -15.91526928 | 2.30E-64 | 9.86E-63 |
| Dnaja4   | 79  | 4.039316449 | 1.274264426 | -2.765052022 | 2.42E-64 | 1.03E-62 |
| Tmem184a | 25  | 60.61039972 | 47.55370949 | -13.05669023 | 3.97E-64 | 1.69E-62 |
| Gm3458   | 74  | 21.62675579 | 29.78576233 | 8.159006537  | 7.27E-64 | 3.09E-62 |
| Cacna1c  | 111 | 8.85770302  | 5.698756934 | -3.158946087 | 7.37E-64 | 3.13E-62 |
| Wtip     | 35  | 2.234430728 | 9.13996436  | 6.905533632  | 1.85E-63 | 7.81E-62 |
| Fam217b  | 38  | 60.10876449 | 72.33739932 | 12.22863483  | 2.38E-63 | 1.00E-61 |
| Lrig3    | 95  | 43.9006347  | 51.5873651  | 7.686730398  | 3.10E-63 | 1.31E-61 |
| Repin1   | 20  | 29.30861419 | 14.52018393 | -14.78843026 | 4.19E-63 | 1.76E-61 |
| Sec31b   | 28  | 23.20030429 | 14.31064708 | -8.889657204 | 6.40E-63 | 2.67E-61 |
| Cbln2    | 14  | 35.55773635 | 15.85741352 | -19.70032284 | 9.12E-63 | 3.80E-61 |
| Sohlh2   | 38  | 93.23491191 | 84.42818361 | -8.8067283   | 9.51E-63 | 3.95E-61 |
| Dlc1     | 74  | 25.78529157 | 19.08802092 | -6.697270648 | 9.73E-63 | 4.03E-61 |
| Gnmt     | 27  | 44.68042458 | 30.13989445 | -14.54053013 | 9.96E-63 | 4.11E-61 |
| Tmem200a | 33  | 9.060734735 | 2.402485274 | -6.65824946  | 1.07E-62 | 4.40E-61 |
| T        | 55  | 30.09043355 | 23.05784389 | -7.032589655 | 1.76E-62 | 7.23E-61 |
| Pdpn     | 17  | 32.07614745 | 17.58236112 | -14.49378633 | 2.15E-62 | 8.83E-61 |
| Sorl1    | 48  | 5.866059723 | 14.52931201 | 8.663252291  | 2.55E-62 | 1.04E-60 |
| Foxc2    | 77  | 52.22525922 | 60.28362485 | 8.058365628  | 2.83E-62 | 1.15E-60 |
| Nkx3-2   | 68  | 37.22346293 | 30.54104524 | -6.682417694 | 3.44E-62 | 1.40E-60 |
| Cldn3    | 33  | 15.81428113 | 29.95194142 | 14.13766029  | 4.99E-62 | 2.02E-60 |
| Nmb      | 24  | 16.79346284 | 28.81349805 | 12.02003522  | 6.35E-62 | 2.57E-60 |
| Tkfc     | 5   | 64.33929458 | 30.20779153 | -34.13150305 | 8.89E-62 | 3.58E-60 |
| Tubg2    | 22  | 15.04412529 | 6.252523216 | -8.791602074 | 1.12E-61 | 4.48E-60 |
| Adam11   | 51  | 7.712355533 | 3.206653429 | -4.505702103 | 3.00E-61 | 1.20E-59 |
| Lrfn5    | 30  | 33.18218633 | 20.09544386 | -13.08674247 | 3.68E-61 | 1.47E-59 |

|         |     |             |             |              |          |          |
|---------|-----|-------------|-------------|--------------|----------|----------|
| Dlk1    | 61  | 52.01302622 | 45.29054521 | -6.722481003 | 3.82E-61 | 1.52E-59 |
| Arhgap8 | 17  | 11.81891721 | 2.387139732 | -9.431777483 | 3.98E-61 | 1.58E-59 |
| Pik3cd  | 44  | 17.68314827 | 10.0285873  | -7.654560971 | 4.98E-61 | 1.98E-59 |
| Mir6943 | 5   | 67.72234092 | 29.52732039 | -38.19502052 | 6.47E-61 | 2.56E-59 |
| She     | 143 | 33.86194628 | 39.94511944 | 6.083173163  | 6.51E-61 | 2.57E-59 |
| Ephb2   | 116 | 6.001273932 | 3.521510631 | -2.479763302 | 6.63E-61 | 2.61E-59 |
| Gdf7    | 50  | 26.31039838 | 36.44011336 | 10.12971498  | 8.85E-61 | 3.47E-59 |
| Gm829   | 9   | 66.29510332 | 40.76057115 | -25.53453217 | 2.39E-60 | 9.35E-59 |
| Adra2c  | 28  | 27.65836873 | 39.93112135 | 12.27275262  | 2.60E-60 | 1.01E-58 |
| Ltk     | 112 | 8.04014965  | 4.689171967 | -3.350977683 | 3.69E-60 | 1.44E-58 |
| Cabp7   | 171 | 19.17961845 | 24.89294541 | 5.713326957  | 3.75E-60 | 1.45E-58 |
| Trpv4   | 24  | 17.4361334  | 9.310263278 | -8.125870127 | 5.75E-60 | 2.23E-58 |
| Gm6194  | 26  | 89.86493994 | 76.85212634 | -13.0128136  | 1.14E-59 | 4.41E-58 |
| Tox     | 57  | 10.77046692 | 6.308054819 | -4.462412103 | 1.30E-59 | 4.99E-58 |
| Rai2    | 50  | 29.92987898 | 16.89787289 | -13.03200609 | 2.33E-59 | 8.94E-58 |
| Rtn1    | 65  | 37.05251244 | 30.50043607 | -6.55207636  | 3.38E-59 | 1.30E-57 |
| Hoxd11  | 100 | 52.75597881 | 61.4629748  | 8.70699598   | 3.61E-59 | 1.38E-57 |
| Ccdc158 | 44  | 20.303295   | 30.31806069 | 10.01476568  | 6.42E-59 | 2.45E-57 |
| Ptchd1  | 59  | 24.10548923 | 15.15283325 | -8.952655988 | 6.88E-59 | 2.62E-57 |
| Asxl3   | 85  | 26.52104973 | 33.52286026 | 7.00181053   | 7.97E-59 | 3.02E-57 |
| H2-Q10  | 35  | 19.33247267 | 30.5287515  | 11.19627883  | 8.22E-59 | 3.11E-57 |
| Gm16617 | 33  | 90.93485852 | 80.79421541 | -10.14064311 | 8.45E-59 | 3.19E-57 |
| Abcg1   | 32  | 12.3516865  | 5.461080084 | -6.890606413 | 9.42E-59 | 3.55E-57 |
| Ripply3 | 10  | 22.56504731 | 8.947574097 | -13.61747321 | 2.65E-58 | 9.95E-57 |
| Notum   | 123 | 7.51979075  | 5.775528665 | -1.744262085 | 2.71E-58 | 1.01E-56 |
| Necab3  | 21  | 19.26779217 | 33.35443207 | 14.0866399   | 3.07E-58 | 1.15E-56 |
| Fzd9    | 94  | 26.91399245 | 21.43610486 | -5.477887595 | 3.29E-58 | 1.23E-56 |
| Kcnj12  | 124 | 8.930553532 | 6.063667199 | -2.866886332 | 4.07E-58 | 1.51E-56 |
| Chst13  | 15  | 15.49520395 | 28.23519257 | 12.73998862  | 6.75E-58 | 2.50E-56 |
| Tuba4a  | 72  | 13.2180774  | 7.3417438   | -5.876333596 | 1.20E-57 | 4.44E-56 |
| Sstr4   | 55  | 52.9587841  | 62.92717696 | 9.968392865  | 2.22E-57 | 8.19E-56 |
| Jph1    | 87  | 25.53335928 | 33.36466517 | 7.831305886  | 2.71E-57 | 9.97E-56 |
| Gm20556 | 15  | 13.8725555  | 3.134066253 | -10.73848925 | 6.48E-57 | 2.38E-55 |
| Magohb  | 23  | 5.180896134 | 1.17919206  | -4.001704074 | 7.04E-57 | 2.57E-55 |

|          |     |             |             |              |          |          |
|----------|-----|-------------|-------------|--------------|----------|----------|
| Lrp2     | 68  | 13.97492125 | 9.555079287 | -4.419841958 | 1.32E-56 | 4.82E-55 |
| Scx      | 48  | 15.92433243 | 10.37228242 | -5.552050015 | 1.38E-56 | 5.03E-55 |
| Isl1     | 57  | 53.34757471 | 63.95433254 | 10.60675782  | 1.78E-56 | 6.46E-55 |
| Gbx2     | 87  | 38.93098647 | 47.08488026 | 8.153893783  | 3.28E-56 | 1.19E-54 |
| Atoh7    | 63  | 16.33920213 | 11.31016238 | -5.029039747 | 3.88E-56 | 1.40E-54 |
| Prima1   | 65  | 29.13171552 | 23.78402611 | -5.34768941  | 4.12E-56 | 1.49E-54 |
| Stc2     | 26  | 11.95726938 | 5.776989026 | -6.180280353 | 4.28E-56 | 1.54E-54 |
| Pla2r1   | 6   | 40.23674991 | 10.90257753 | -29.33417238 | 4.60E-56 | 1.65E-54 |
| Sema3b   | 7   | 76.38849866 | 40.46285251 | -35.92564615 | 6.05E-56 | 2.16E-54 |
| Cwh43    | 25  | 37.24539757 | 25.49277008 | -11.75262749 | 9.84E-56 | 3.51E-54 |
| Sntb1    | 37  | 18.65493899 | 13.8674757  | -4.787463293 | 1.15E-55 | 4.09E-54 |
| Mir6990  | 4   | 78.80774256 | 50.47933862 | -28.32840395 | 1.27E-55 | 4.52E-54 |
| Hdgfl1   | 9   | 91.76643637 | 76.11667407 | -15.6497623  | 1.36E-55 | 4.80E-54 |
| Sulf2    | 122 | 4.378953733 | 2.076432641 | -2.302521092 | 1.61E-55 | 5.68E-54 |
| Grm2     | 31  | 20.58781167 | 8.702505331 | -11.88530634 | 3.89E-55 | 1.37E-53 |
| BC021891 | 39  | 23.77133487 | 16.63042257 | -7.140912302 | 8.14E-55 | 2.86E-53 |
| Mesp1    | 28  | 24.39835392 | 37.82887151 | 13.43051759  | 1.16E-54 | 4.08E-53 |
| Medag    | 8   | 32.41357777 | 8.129767982 | -24.28380979 | 1.64E-54 | 5.74E-53 |
| Ntrk3    | 61  | 32.48331986 | 24.40407756 | -8.079242293 | 1.73E-54 | 6.05E-53 |
| Pdx1     | 31  | 28.09869423 | 17.80203031 | -10.29666392 | 2.30E-54 | 8.00E-53 |
| Mir3544  | 9   | 83.95903574 | 61.02366216 | -22.93537357 | 2.81E-54 | 9.74E-53 |
| Mir540   | 9   | 83.95903574 | 61.02366216 | -22.93537357 | 2.81E-54 | 9.74E-53 |
| Tcfl5    | 96  | 67.87271766 | 74.65384802 | 6.78113036   | 3.88E-54 | 1.34E-52 |
| Oxtr     | 17  | 23.22315492 | 8.905396947 | -14.31775798 | 4.51E-54 | 1.56E-52 |
| Cap2     | 31  | 21.94297103 | 14.15794908 | -7.785021943 | 4.53E-54 | 1.56E-52 |
| Lgi3     | 33  | 7.612231858 | 2.94420514  | -4.668026719 | 4.90E-54 | 1.68E-52 |
| Ube2q2   | 91  | 3.366211807 | 1.270856046 | -2.095355761 | 5.50E-54 | 1.88E-52 |
| Slc24a2  | 31  | 34.23073515 | 21.09233316 | -13.13840199 | 8.32E-54 | 2.84E-52 |
| Prr18    | 79  | 12.70224383 | 19.31432535 | 6.612081518  | 9.68E-54 | 3.30E-52 |
| Pdlim4   | 52  | 14.26757046 | 21.39826539 | 7.130694923  | 1.09E-53 | 3.72E-52 |
| Sim2     | 54  | 11.33320818 | 19.34107415 | 8.00786597   | 1.47E-53 | 5.00E-52 |
| Eid2     | 74  | 4.935482839 | 2.083101553 | -2.852381286 | 1.96E-53 | 6.64E-52 |
| Unc5d    | 58  | 47.48703338 | 56.82567371 | 9.338640334  | 1.99E-53 | 6.73E-52 |
| Soga3    | 16  | 28.39946893 | 15.63501914 | -12.76444979 | 2.00E-53 | 6.76E-52 |

|            |     |             |             |              |          |          |
|------------|-----|-------------|-------------|--------------|----------|----------|
| Adamts2    | 86  | 22.63930478 | 18.0027492  | -4.636555578 | 2.75E-53 | 9.25E-52 |
| P3h3       | 102 | 4.682605048 | 3.218394439 | -1.464210609 | 3.87E-53 | 1.30E-51 |
| Gyg        | 34  | 3.602482061 | 1.139225601 | -2.46325646  | 4.91E-53 | 1.65E-51 |
| Mei4       | 37  | 11.69368232 | 22.38298568 | 10.68930337  | 5.88E-53 | 1.97E-51 |
| Klhl23     | 40  | 7.915076541 | 4.605359576 | -3.309716966 | 9.63E-53 | 3.21E-51 |
| Hoxd9      | 48  | 47.57012847 | 58.42654535 | 10.85641689  | 1.11E-52 | 3.71E-51 |
| Foxd1      | 40  | 6.683355482 | 2.052907788 | -4.630447694 | 1.27E-52 | 4.20E-51 |
| Susd1      | 45  | 6.553644148 | 11.67477526 | 5.121131117  | 1.92E-52 | 6.37E-51 |
| Fgf13      | 59  | 24.03075463 | 14.59422765 | -9.436526985 | 2.95E-52 | 9.75E-51 |
| Heyl       | 35  | 8.90065879  | 3.847257329 | -5.053401461 | 4.26E-52 | 1.41E-50 |
| Cited4     | 33  | 7.962085272 | 2.53438404  | -5.427701232 | 4.81E-52 | 1.58E-50 |
| Cyct       | 8   | 76.67608486 | 46.92551601 | -29.75056885 | 8.08E-52 | 2.65E-50 |
| Adcy7      | 47  | 15.57283675 | 23.93310587 | 8.360269118  | 1.57E-51 | 5.13E-50 |
| Casd1      | 76  | 3.27451161  | 1.595080201 | -1.679431409 | 1.74E-51 | 5.68E-50 |
| Mag        | 8   | 69.62465806 | 39.82329803 | -29.80136003 | 1.85E-51 | 6.04E-50 |
| Tcf24      | 114 | 41.76762529 | 48.9436271  | 7.176001814  | 2.01E-51 | 6.54E-50 |
| Spock2     | 39  | 14.3903801  | 24.1628125  | 9.772432397  | 2.39E-51 | 7.75E-50 |
| Efcab6     | 10  | 60.5014111  | 31.00680879 | -29.49460231 | 2.47E-51 | 7.99E-50 |
| Nfe2       | 22  | 17.71813264 | 9.024699301 | -8.693433336 | 3.52E-51 | 1.14E-49 |
| Anks6      | 109 | 4.904347287 | 2.702595379 | -2.201751909 | 3.65E-51 | 1.18E-49 |
| Tc2n       | 104 | 11.80104102 | 8.056581255 | -3.744459767 | 4.76E-51 | 1.53E-49 |
| Tmem233    | 21  | 47.62267511 | 34.95778575 | -12.66488936 | 4.93E-51 | 1.58E-49 |
| Ebf3       | 99  | 14.70785209 | 11.57040625 | -3.137445839 | 5.66E-51 | 1.81E-49 |
| Frm4b      | 46  | 39.46711561 | 30.23857554 | -9.228540071 | 6.10E-51 | 1.95E-49 |
| 700039E15F | 10  | 73.73043539 | 49.60839802 | -24.12203737 | 6.76E-51 | 2.16E-49 |
| Ankrd6     | 60  | 26.63559143 | 19.63731444 | -6.99827699  | 7.14E-51 | 2.27E-49 |
| Slc26a4    | 28  | 7.879771482 | 19.08325325 | 11.20348177  | 7.78E-51 | 2.47E-49 |
| Pank1      | 88  | 2.57423673  | 0.973247504 | -1.600989226 | 7.91E-51 | 2.51E-49 |
| Cplx2      | 18  | 18.58376836 | 8.54626405  | -10.03750431 | 8.80E-51 | 2.78E-49 |
| Tmem178    | 109 | 18.08416706 | 14.67900747 | -3.405159593 | 9.02E-51 | 2.85E-49 |
| Nol4l      | 201 | 5.665270339 | 3.459149943 | -2.206120396 | 9.63E-51 | 3.03E-49 |
| AF529169   | 27  | 38.46437943 | 27.42342819 | -11.04095124 | 1.11E-50 | 3.50E-49 |
| Gm20554    | 30  | 46.28818406 | 33.42523046 | -12.8629536  | 1.57E-50 | 4.93E-49 |
| Ccdc64b    | 25  | 24.30071454 | 14.79383158 | -9.506882964 | 1.85E-50 | 5.78E-49 |

|            |    |             |             |              |          |          |
|------------|----|-------------|-------------|--------------|----------|----------|
| Catsper1   | 4  | 84.61201919 | 45.41657347 | -39.19544572 | 2.24E-50 | 7.00E-49 |
| Gab1       | 62 | 5.975463327 | 2.959650774 | -3.015812552 | 2.35E-50 | 7.31E-49 |
| Ogfod2     | 17 | 26.97605541 | 47.16560517 | 20.18954976  | 3.07E-50 | 9.55E-49 |
| Hs3st3b1   | 94 | 5.87912083  | 10.08133481 | 4.202213984  | 4.16E-50 | 1.29E-48 |
| Ptk6       | 6  | 65.31079309 | 34.27781194 | -31.03298115 | 4.35E-50 | 1.35E-48 |
| Kcnq3      | 73 | 30.50302156 | 35.10185514 | 4.598833583  | 6.19E-50 | 1.91E-48 |
| H2-Q8      | 8  | 10.81429012 | 2.518459506 | -8.29583061  | 6.55E-50 | 2.02E-48 |
| Rnls       | 18 | 4.824268045 | 0.657999241 | -4.166268804 | 6.67E-50 | 2.05E-48 |
| Eef1a2     | 22 | 34.43780724 | 48.816665   | 14.37885776  | 6.90E-50 | 2.12E-48 |
| Cdh6       | 29 | 16.39838053 | 8.626077253 | -7.772303279 | 7.46E-50 | 2.28E-48 |
| '00125G02F | 53 | 13.02887987 | 8.775581767 | -4.253298099 | 8.92E-50 | 2.73E-48 |
| Syt14      | 39 | 36.54691392 | 48.47931193 | 11.93239801  | 1.16E-49 | 3.53E-48 |
| Mapk12     | 43 | 5.122858741 | 2.0577989   | -3.065059842 | 1.44E-49 | 4.40E-48 |
| i10027K06F | 27 | 13.07550459 | 6.339577171 | -6.735927421 | 1.69E-49 | 5.14E-48 |
| Bfsp1      | 69 | 41.82838313 | 48.93218055 | 7.103797415  | 1.72E-49 | 5.21E-48 |
| St8sia1    | 62 | 25.98693271 | 19.84409776 | -6.142834953 | 2.02E-49 | 6.12E-48 |
| Csmd2      | 49 | 58.13124398 | 69.96304709 | 11.83180311  | 2.51E-49 | 7.57E-48 |
| Bves       | 67 | 42.36598626 | 50.83838931 | 8.472403042  | 2.63E-49 | 7.93E-48 |
| Gpx7       | 38 | 31.66310194 | 42.46819291 | 10.80509097  | 2.73E-49 | 8.21E-48 |
| Mdga2      | 44 | 48.17498915 | 57.82511249 | 9.650123338  | 2.84E-49 | 8.52E-48 |
| Fam163a    | 41 | 24.0977804  | 32.90640544 | 8.808625041  | 2.95E-49 | 8.83E-48 |
| Adrbk2     | 17 | 26.50465116 | 14.04919925 | -12.45545191 | 3.10E-49 | 9.26E-48 |
| Scd1       | 29 | 6.052882934 | 2.572032475 | -3.480850459 | 3.40E-49 | 1.01E-47 |
| Actn2      | 36 | 38.68167069 | 48.97775879 | 10.2960881   | 4.34E-49 | 1.29E-47 |
| Ttc39c     | 59 | 3.475444885 | 1.281969394 | -2.193475491 | 5.04E-49 | 1.50E-47 |
| Drd2       | 58 | 50.87006713 | 60.32804708 | 9.457979951  | 5.59E-49 | 1.66E-47 |
| Faxc       | 82 | 4.238008488 | 2.014008079 | -2.224000409 | 6.23E-49 | 1.84E-47 |
| i30409D20F | 31 | 38.11498438 | 48.06631848 | 9.951334108  | 8.68E-49 | 2.56E-47 |
| Grem1      | 26 | 23.06186395 | 32.97942009 | 9.917556143  | 8.78E-49 | 2.59E-47 |
| BC055111   | 19 | 10.94909606 | 3.360326584 | -7.588769475 | 1.19E-48 | 3.49E-47 |
| Neurl1a    | 99 | 6.442899193 | 3.473325609 | -2.969573584 | 1.44E-48 | 4.21E-47 |
| Pmp22      | 59 | 11.0435931  | 6.202508711 | -4.841084392 | 1.47E-48 | 4.30E-47 |
| Dao        | 6  | 90.45864471 | 63.9741685  | -26.48447621 | 1.48E-48 | 4.34E-47 |
| Sorbs3     | 66 | 8.860310426 | 5.415873436 | -3.44443699  | 1.54E-48 | 4.50E-47 |

|            |     |             |             |              |          |          |
|------------|-----|-------------|-------------|--------------|----------|----------|
| Kcnc3      | 60  | 4.439379183 | 8.917548664 | 4.478169481  | 2.94E-48 | 8.57E-47 |
| Hdgfrp3    | 77  | 47.99173029 | 56.3631958  | 8.371465504  | 3.98E-48 | 1.16E-46 |
| Fam19a2    | 4   | 12.47746156 | 36.92280754 | 24.44534597  | 5.01E-48 | 1.45E-46 |
| Gm21949    | 7   | 57.3979544  | 36.02188773 | -21.37606667 | 5.46E-48 | 1.58E-46 |
| lqcj       | 7   | 57.3979544  | 36.02188773 | -21.37606667 | 5.46E-48 | 1.58E-46 |
| '00016H13F | 25  | 6.351349752 | 2.24321977  | -4.108129982 | 5.68E-48 | 1.64E-46 |
| i30019K06F | 32  | 28.47121029 | 17.38052269 | -11.09068761 | 6.76E-48 | 1.94E-46 |
| Kcnj6      | 16  | 46.58151384 | 26.72983548 | -19.85167836 | 8.17E-48 | 2.35E-46 |
| Popdc3     | 38  | 17.21600518 | 9.932231788 | -7.283773388 | 1.02E-47 | 2.92E-46 |
| Arsb       | 57  | 5.045318697 | 1.378534941 | -3.666783756 | 1.06E-47 | 3.02E-46 |
| Cxcl12     | 38  | 57.82471167 | 69.13382521 | 11.30911355  | 1.15E-47 | 3.29E-46 |
| Kcnj3      | 15  | 33.82483417 | 21.09068441 | -12.73414976 | 1.55E-47 | 4.42E-46 |
| Prob1      | 17  | 18.95173876 | 33.47313721 | 14.52139844  | 1.92E-47 | 5.46E-46 |
| Dapk2      | 57  | 5.209060781 | 2.37619384  | -2.832866941 | 2.46E-47 | 6.98E-46 |
| Gldn       | 17  | 42.25799943 | 30.98348154 | -11.2745179  | 2.94E-47 | 8.34E-46 |
| Chrna1     | 6   | 58.89837823 | 30.93956561 | -27.95881262 | 3.01E-47 | 8.50E-46 |
| Nefm       | 48  | 44.45314472 | 57.09489258 | 12.64174786  | 3.05E-47 | 8.62E-46 |
| Qrfpr      | 10  | 27.06631319 | 14.76009037 | -12.30622282 | 4.07E-47 | 1.15E-45 |
| Fgf20      | 33  | 16.59068163 | 26.64805982 | 10.05737818  | 4.15E-47 | 1.17E-45 |
| Krt72      | 11  | 93.35654108 | 73.1767274  | -20.17981368 | 4.18E-47 | 1.17E-45 |
| Gdf6       | 74  | 14.80387224 | 11.21423538 | -3.589636859 | 4.77E-47 | 1.33E-45 |
| i30025P09F | 38  | 5.434170024 | 1.15752367  | -4.276646354 | 6.11E-47 | 1.71E-45 |
| Bfsp2      | 5   | 74.37315465 | 50.33548985 | -24.0376648  | 6.23E-47 | 1.74E-45 |
| i31419H13F | 58  | 18.7744207  | 13.48255304 | -5.291867657 | 7.46E-47 | 2.08E-45 |
| Dcaf12l1   | 26  | 47.22297437 | 61.61891688 | 14.39594251  | 9.74E-47 | 2.71E-45 |
| Cntlh      | 59  | 31.59035503 | 40.7798419  | 9.189486875  | 1.00E-46 | 2.79E-45 |
| Syne1      | 18  | 8.334645562 | 20.33425257 | 11.99960701  | 1.01E-46 | 2.80E-45 |
| Zfp422     | 65  | 3.9609896   | 1.721049513 | -2.239940087 | 1.01E-46 | 2.80E-45 |
| Tdrd5      | 63  | 25.22139627 | 32.86865165 | 7.647255387  | 1.16E-46 | 3.20E-45 |
| Gm5607     | 62  | 32.73765877 | 40.75745907 | 8.019800302  | 1.35E-46 | 3.72E-45 |
| Grin1os    | 34  | 6.954117499 | 2.680831818 | -4.27328568  | 2.22E-46 | 6.10E-45 |
| Mybpc3     | 4   | 91.64011232 | 58.09690174 | -33.54321059 | 3.25E-46 | 8.92E-45 |
| Mroh5      | 65  | 26.0549105  | 20.99688658 | -5.058023912 | 3.38E-46 | 9.25E-45 |
| Dlgap3     | 102 | 7.235404509 | 4.423227159 | -2.81217735  | 4.51E-46 | 1.23E-44 |



|            |     |             |             |              |          |          |
|------------|-----|-------------|-------------|--------------|----------|----------|
| Gjb6       | 33  | 16.84936725 | 8.290171313 | -8.559195942 | 4.91E-46 | 1.34E-44 |
| Nkd2       | 28  | 12.58280198 | 3.897378619 | -8.685423363 | 5.21E-46 | 1.42E-44 |
| Sox17      | 25  | 46.68351143 | 59.00840158 | 12.32489015  | 5.48E-46 | 1.49E-44 |
| Krtdap     | 11  | 69.66865929 | 51.52405338 | -18.14460592 | 6.46E-46 | 1.75E-44 |
| I30412G12F | 64  | 50.64930799 | 58.50570047 | 7.856392485  | 7.57E-46 | 2.05E-44 |
| Slc30a2    | 52  | 12.22564029 | 18.64024684 | 6.414606549  | 7.64E-46 | 2.06E-44 |
| Slc12a8    | 14  | 17.19026209 | 7.545816558 | -9.644445534 | 8.57E-46 | 2.31E-44 |
| Cspg4      | 12  | 52.19713701 | 74.56321089 | 22.36607389  | 8.63E-46 | 2.32E-44 |
| Cmya5      | 16  | 29.70124315 | 18.35655387 | -11.34468928 | 9.32E-46 | 2.50E-44 |
| Olfml1     | 7   | 72.90697192 | 49.72910069 | -23.17787124 | 1.02E-45 | 2.75E-44 |
| Ppic       | 37  | 3.44830805  | 7.614006517 | 4.165698467  | 1.46E-45 | 3.90E-44 |
| 333406I18R | 50  | 4.642623065 | 1.928327851 | -2.714295214 | 1.71E-45 | 4.58E-44 |
| Tmem163    | 65  | 4.094313168 | 1.63928695  | -2.455026218 | 2.73E-45 | 7.29E-44 |
| Amn        | 37  | 36.04241725 | 46.46204643 | 10.41962918  | 2.92E-45 | 7.79E-44 |
| Chd5       | 118 | 8.335823591 | 12.2549495  | 3.919125908  | 3.24E-45 | 8.61E-44 |
| Gfra1      | 41  | 8.971303348 | 4.671473044 | -4.299830304 | 3.72E-45 | 9.88E-44 |
| Fam78a     | 125 | 7.064520914 | 10.52988183 | 3.465360913  | 3.99E-45 | 1.06E-43 |
| Gdf10      | 78  | 31.01019227 | 26.95516353 | -4.05502874  | 4.02E-45 | 1.06E-43 |
| Mixl1      | 45  | 19.22920751 | 27.9251383  | 8.695930787  | 4.32E-45 | 1.14E-43 |
| Efhd1      | 43  | 7.422201882 | 14.44078069 | 7.018578806  | 5.63E-45 | 1.48E-43 |
| Pax6       | 92  | 32.31687713 | 39.75031036 | 7.433433226  | 6.35E-45 | 1.67E-43 |
| Ankrd29    | 31  | 5.655667722 | 1.7772771   | -3.878390622 | 6.63E-45 | 1.74E-43 |
| Rhbdl3     | 71  | 7.409858488 | 4.602731367 | -2.807127121 | 7.06E-45 | 1.85E-43 |
| Aqp3       | 25  | 19.8324145  | 12.23649797 | -7.595916531 | 7.30E-45 | 1.91E-43 |
| Rims1      | 64  | 17.00279371 | 12.06909317 | -4.933700541 | 7.36E-45 | 1.92E-43 |
| Ahrr       | 19  | 12.13580359 | 3.20831348  | -8.927490115 | 1.53E-44 | 3.98E-43 |
| Lhcgr      | 26  | 71.04537018 | 57.57317496 | -13.47219522 | 1.93E-44 | 5.03E-43 |
| Zfp518a    | 25  | 8.330005001 | 2.663236841 | -5.66676816  | 2.08E-44 | 5.41E-43 |
| Tox3       | 115 | 63.88509296 | 69.26852509 | 5.383432132  | 2.16E-44 | 5.59E-43 |
| Colgalt2   | 27  | 11.84049032 | 25.62475104 | 13.78426072  | 2.47E-44 | 6.38E-43 |
| Rnf186     | 16  | 73.52770345 | 56.93871842 | -16.58898502 | 2.63E-44 | 6.80E-43 |
| Pde11a     | 12  | 53.32696797 | 37.89692343 | -15.43004454 | 3.25E-44 | 8.39E-43 |
| Mir6385    | 15  | 89.17293665 | 76.3844396  | -12.78849705 | 3.35E-44 | 8.64E-43 |
| Arhgef3    | 19  | 26.95324032 | 21.01231835 | -5.94092197  | 3.40E-44 | 8.74E-43 |

|           |     |             |             |              |          |          |
|-----------|-----|-------------|-------------|--------------|----------|----------|
| Fam110b   | 42  | 21.5340564  | 13.9852456  | -7.548810798 | 5.94E-44 | 1.52E-42 |
| Mir6366   | 8   | 89.29490788 | 70.1894935  | -19.10541438 | 6.49E-44 | 1.66E-42 |
| Ccdc185   | 22  | 92.83690392 | 81.82662634 | -11.01027759 | 7.27E-44 | 1.86E-42 |
| Kcnnh2    | 83  | 9.329907637 | 6.884750721 | -2.445156915 | 8.04E-44 | 2.05E-42 |
| Lhpp      | 21  | 3.022477703 | 12.62446277 | 9.601985063  | 8.08E-44 | 2.06E-42 |
| Erbp4     | 55  | 37.79190219 | 47.48980968 | 9.697907486  | 1.63E-43 | 4.15E-42 |
| Timp3     | 32  | 13.09897741 | 6.88509251  | -6.213884901 | 1.95E-43 | 4.96E-42 |
| Thrb      | 81  | 5.069214518 | 9.845217021 | 4.776002504  | 2.36E-43 | 5.98E-42 |
| Six3os1   | 38  | 18.76277803 | 13.82271593 | -4.940062098 | 2.72E-43 | 6.89E-42 |
| Cabyr     | 23  | 9.4335945   | 3.468941483 | -5.964653017 | 3.90E-43 | 9.83E-42 |
| 9-Sep     | 110 | 27.74210528 | 22.96702281 | -4.77508247  | 3.90E-43 | 9.83E-42 |
| Otud7a    | 84  | 53.87956636 | 59.89574581 | 6.016179449  | 4.81E-43 | 1.21E-41 |
| Gabrb3    | 93  | 52.46238301 | 58.6286934  | 6.166310391  | 5.54E-43 | 1.39E-41 |
| Clgn      | 31  | 14.50218725 | 21.55342913 | 7.051241875  | 1.35E-42 | 3.38E-41 |
| Pcdh19    | 31  | 29.99094885 | 18.71966644 | -11.2712824  | 2.22E-42 | 5.55E-41 |
| Erc2      | 49  | 5.18199256  | 2.29792434  | -2.88406822  | 3.12E-42 | 7.81E-41 |
| Ttll3     | 51  | 58.51888841 | 51.66832468 | -6.850563729 | 3.40E-42 | 8.48E-41 |
| Cebpe     | 17  | 60.57820471 | 44.24342717 | -16.33477753 | 4.01E-42 | 9.98E-41 |
| Nfatc2    | 82  | 12.4989028  | 18.93725016 | 6.438347352  | 4.37E-42 | 1.09E-40 |
| Nrip3     | 60  | 11.122711   | 6.499799684 | -4.622911318 | 4.46E-42 | 1.11E-40 |
| Bmp3      | 30  | 15.23658864 | 6.815645025 | -8.420943613 | 4.76E-42 | 1.18E-40 |
| Rnf208    | 20  | 30.75897665 | 21.52310082 | -9.235875836 | 4.78E-42 | 1.18E-40 |
| Ebf1      | 41  | 26.48981047 | 20.28354952 | -6.206260955 | 5.12E-42 | 1.27E-40 |
| Gm996     | 18  | 33.32171188 | 45.60614553 | 12.28443365  | 5.20E-42 | 1.28E-40 |
| Dennd2a   | 99  | 8.882400509 | 6.975052699 | -1.90734781  | 6.03E-42 | 1.48E-40 |
| Shd       | 29  | 13.11319373 | 21.07673498 | 7.963541252  | 7.00E-42 | 1.72E-40 |
| Fgf6      | 9   | 79.88646605 | 61.40294962 | -18.48351643 | 8.78E-42 | 2.15E-40 |
| H2-Q5     | 11  | 17.58228844 | 4.938969411 | -12.64331903 | 8.79E-42 | 2.15E-40 |
| Gnao1     | 108 | 7.007739873 | 3.773702288 | -3.234037585 | 1.06E-41 | 2.59E-40 |
| Aebp1     | 31  | 12.65640406 | 5.426813357 | -7.229590707 | 1.07E-41 | 2.62E-40 |
| Tmem88    | 22  | 60.27052225 | 50.25723079 | -10.01329146 | 1.12E-41 | 2.73E-40 |
| Fes       | 11  | 16.16319084 | 4.853504328 | -11.30968651 | 1.18E-41 | 2.88E-40 |
| 30006D01F | 14  | 58.22335308 | 43.13415822 | -15.08919486 | 1.91E-41 | 4.63E-40 |
| Ajap1     | 157 | 62.97213502 | 67.64789171 | 4.675756695  | 2.35E-41 | 5.69E-40 |

|            |     |             |             |              |          |          |
|------------|-----|-------------|-------------|--------------|----------|----------|
| Syndig1l   | 74  | 10.19891449 | 15.10207118 | 4.903156687  | 2.51E-41 | 6.07E-40 |
| Mir128-2   | 13  | 62.34112493 | 46.8872194  | -15.45390554 | 2.56E-41 | 6.19E-40 |
| Ccnjl      | 77  | 7.731932969 | 4.201412061 | -3.530520908 | 2.56E-41 | 6.19E-40 |
| Slfn10-ps  | 11  | 49.72023791 | 30.59285181 | -19.1273861  | 3.01E-41 | 7.25E-40 |
| Tshz3      | 100 | 48.92746977 | 54.28021026 | 5.35274049   | 3.62E-41 | 8.71E-40 |
| Matk       | 50  | 20.76825701 | 16.40407938 | -4.36417763  | 5.13E-41 | 1.23E-39 |
| Vgll2      | 34  | 17.5031718  | 27.11266875 | 9.609496947  | 5.37E-41 | 1.29E-39 |
| Negr1      | 54  | 51.07495317 | 58.93867074 | 7.863717568  | 5.46E-41 | 1.31E-39 |
| Rab11fip5  | 70  | 4.49951761  | 1.688917149 | -2.810600462 | 5.69E-41 | 1.36E-39 |
| Fbxo17     | 13  | 28.06180802 | 15.01167777 | -13.05013025 | 6.12E-41 | 1.46E-39 |
| Fzd6       | 44  | 4.081734507 | 1.569385468 | -2.512349039 | 1.23E-40 | 2.93E-39 |
| Lrrc75b    | 84  | 6.086394537 | 3.061698946 | -3.024695591 | 1.32E-40 | 3.15E-39 |
| Plcb1      | 76  | 5.528038625 | 2.808751913 | -2.719286712 | 1.81E-40 | 4.29E-39 |
| Mir1901    | 64  | 7.901721895 | 3.561633473 | -4.340088422 | 1.90E-40 | 4.50E-39 |
| Efcc1      | 51  | 6.480122543 | 2.865364659 | -3.614757884 | 2.59E-40 | 6.14E-39 |
| Tcte1      | 3   | 84.55288091 | 51.66022743 | -32.89265348 | 3.08E-40 | 7.28E-39 |
| Pde3a      | 26  | 48.15968568 | 58.70929106 | 10.54960538  | 3.67E-40 | 8.66E-39 |
| Zfp882     | 19  | 8.85469139  | 2.075625764 | -6.779065626 | 5.91E-40 | 1.39E-38 |
| Slc2a4     | 15  | 6.991678222 | 18.56877689 | 11.57709867  | 5.97E-40 | 1.40E-38 |
| Slain1     | 61  | 6.184398634 | 3.366844365 | -2.817554268 | 6.48E-40 | 1.52E-38 |
| Pkdrej     | 39  | 10.82688789 | 6.785565841 | -4.041322051 | 7.40E-40 | 1.73E-38 |
| Cited1     | 66  | 25.28109138 | 16.94537251 | -8.335718874 | 7.51E-40 | 1.76E-38 |
| Dlx4       | 43  | 7.65158779  | 2.569358242 | -5.082229548 | 1.03E-39 | 2.41E-38 |
| Spata6     | 45  | 25.31783057 | 36.25729445 | 10.93946388  | 1.04E-39 | 2.43E-38 |
| Arhgap44   | 50  | 7.046515048 | 3.528604175 | -3.517910873 | 1.27E-39 | 2.96E-38 |
| Pgbd5      | 176 | 4.927817509 | 2.926396561 | -2.001420948 | 2.04E-39 | 4.75E-38 |
| 700017J07R | 10  | 31.39897501 | 11.63492087 | -19.76405414 | 2.08E-39 | 4.82E-38 |
| Slc47a1    | 26  | 15.98971194 | 6.822453121 | -9.167258816 | 2.20E-39 | 5.10E-38 |
| Mkx        | 32  | 7.226541926 | 2.668011087 | -4.558530839 | 2.64E-39 | 6.12E-38 |
| Fktn       | 39  | 34.03081065 | 44.71037534 | 10.67956469  | 2.91E-39 | 6.73E-38 |
| Peg10      | 12  | 55.09404527 | 37.19635579 | -17.89768948 | 4.14E-39 | 9.55E-38 |
| Rbm24      | 17  | 31.97084774 | 21.89546064 | -10.0753871  | 4.23E-39 | 9.75E-38 |
| 333428L15F | 46  | 36.09594973 | 27.29532575 | -8.800623982 | 4.25E-39 | 9.78E-38 |
| Cacna1i    | 95  | 34.44946464 | 40.0711414  | 5.621676768  | 4.96E-39 | 1.14E-37 |

|            |     |             |             |              |          |          |
|------------|-----|-------------|-------------|--------------|----------|----------|
| Svep1      | 32  | 33.17620502 | 42.25824566 | 9.082040645  | 7.86E-39 | 1.80E-37 |
| Mir6923    | 13  | 75.66738681 | 58.73225393 | -16.93513288 | 8.02E-39 | 1.84E-37 |
| Pde3b      | 57  | 3.350341627 | 1.143314326 | -2.207027301 | 9.11E-39 | 2.08E-37 |
| Amigo3     | 7   | 55.62417561 | 36.34614537 | -19.27803024 | 1.09E-38 | 2.48E-37 |
| Mir874     | 4   | 73.81441552 | 50.70404874 | -23.11036678 | 1.31E-38 | 2.98E-37 |
| Mir6913    | 20  | 83.4906711  | 71.36632019 | -12.12435091 | 1.68E-38 | 3.82E-37 |
| Tctn2      | 16  | 21.65913359 | 9.770258712 | -11.88887488 | 1.74E-38 | 3.96E-37 |
| Mfap3l     | 69  | 5.562446799 | 2.623714317 | -2.938732482 | 1.81E-38 | 4.10E-37 |
| Lyl1       | 28  | 44.21732846 | 55.90212767 | 11.68479921  | 3.64E-38 | 8.25E-37 |
| Begain     | 83  | 4.95641457  | 9.476520782 | 4.520106213  | 4.72E-38 | 1.07E-36 |
| Tmem132d   | 74  | 60.21931355 | 66.45301546 | 6.233701914  | 5.14E-38 | 1.16E-36 |
| Arhgef7    | 226 | 6.481624032 | 4.708170341 | -1.773453691 | 5.22E-38 | 1.18E-36 |
| Fry        | 15  | 36.76240482 | 21.71213746 | -15.05026736 | 7.40E-38 | 1.67E-36 |
| Ii13       | 6   | 81.80555438 | 60.91696484 | -20.88858954 | 9.13E-38 | 2.05E-36 |
| Gpr150     | 12  | 18.49597743 | 7.564774697 | -10.93120273 | 1.09E-37 | 2.44E-36 |
| Ddx25      | 61  | 11.83690186 | 8.674437173 | -3.162464689 | 1.17E-37 | 2.62E-36 |
| Kcnj2      | 26  | 44.52595084 | 55.59143948 | 11.06548865  | 1.55E-37 | 3.46E-36 |
| Wt1        | 28  | 47.72883181 | 58.06570453 | 10.33687271  | 1.58E-37 | 3.53E-36 |
| Mnx1       | 66  | 24.04254771 | 20.61838537 | -3.424162345 | 1.58E-37 | 3.53E-36 |
| Nkx6-1     | 101 | 45.692665   | 51.06533773 | 5.372672729  | 1.73E-37 | 3.85E-36 |
| Gdnf       | 84  | 33.47539039 | 28.88758017 | -4.587810219 | 1.78E-37 | 3.96E-36 |
| Cxcr4      | 11  | 22.03784982 | 7.725060836 | -14.31278898 | 1.95E-37 | 4.33E-36 |
| Tmem72     | 9   | 84.81850516 | 67.45174528 | -17.36675988 | 2.12E-37 | 4.69E-36 |
| Fbxl16     | 81  | 4.285649218 | 2.219951762 | -2.065697455 | 2.22E-37 | 4.91E-36 |
| '30457N03F | 21  | 53.2760318  | 42.65409326 | -10.62193854 | 2.38E-37 | 5.25E-36 |
| Hoxb5      | 16  | 36.65057267 | 50.25782439 | 13.60725173  | 2.47E-37 | 5.46E-36 |
| Shisa2     | 62  | 8.919629907 | 5.507109355 | -3.412520552 | 2.64E-37 | 5.80E-36 |
| Layn       | 18  | 40.11182873 | 29.49935735 | -10.61247138 | 2.64E-37 | 5.80E-36 |
| Fabp3      | 22  | 13.3757785  | 5.602915552 | -7.772862944 | 2.64E-37 | 5.80E-36 |
| Arrdc4     | 17  | 11.33445766 | 2.762182858 | -8.572274807 | 2.97E-37 | 6.52E-36 |
| Fbxo39     | 16  | 23.41115563 | 11.08987574 | -12.32127989 | 3.13E-37 | 6.84E-36 |
| Ttbk1      | 64  | 6.085721077 | 10.6539673  | 4.568246223  | 3.69E-37 | 8.08E-36 |
| Gm8096     | 4   | 85.19046077 | 59.07060921 | -26.11985156 | 3.94E-37 | 8.60E-36 |
| Colec12    | 63  | 33.81107049 | 27.93037882 | -5.880691673 | 4.27E-37 | 9.32E-36 |

|            |     |             |             |              |          |          |
|------------|-----|-------------|-------------|--------------|----------|----------|
| Gm9899     | 72  | 14.71680577 | 21.84901642 | 7.132210645  | 4.35E-37 | 9.47E-36 |
| Amigo2     | 109 | 3.342859667 | 2.03153561  | -1.311324057 | 5.37E-37 | 1.17E-35 |
| 1-Mar      | 30  | 49.79710989 | 61.02147837 | 11.22436847  | 5.43E-37 | 1.18E-35 |
| Agbl2      | 20  | 41.67405839 | 55.11721566 | 13.44315727  | 5.89E-37 | 1.28E-35 |
| Bmpr1b     | 43  | 42.8515887  | 35.45434193 | -7.397246776 | 6.32E-37 | 1.37E-35 |
| Stac       | 60  | 47.59478079 | 55.2746789  | 7.67989811   | 6.52E-37 | 1.41E-35 |
| Gata5      | 55  | 11.09798697 | 6.795138136 | -4.302848838 | 7.16E-37 | 1.55E-35 |
| Myb        | 56  | 17.47582155 | 15.13021844 | -2.345603114 | 7.29E-37 | 1.57E-35 |
| Cd200r2    | 5   | 73.22008091 | 47.50313246 | -25.71694846 | 8.28E-37 | 1.78E-35 |
| Cxcl2      | 5   | 42.88118409 | 16.49538559 | -26.3857985  | 1.02E-36 | 2.20E-35 |
| Cyp26a1    | 32  | 25.09676866 | 34.5298178  | 9.433049142  | 1.15E-36 | 2.48E-35 |
| Mbnl3      | 28  | 24.68700742 | 15.65206568 | -9.034941737 | 1.47E-36 | 3.15E-35 |
| Slc5a4a    | 6   | 79.40230665 | 58.13941031 | -21.26289634 | 1.67E-36 | 3.57E-35 |
| Kcnh5      | 40  | 39.46430059 | 31.3294736  | -8.13482699  | 1.78E-36 | 3.81E-35 |
| Dnah7b     | 21  | 9.34971782  | 3.603373914 | -5.746343905 | 1.86E-36 | 3.97E-35 |
| Rnf144b    | 35  | 9.797134074 | 5.289785177 | -4.507348897 | 1.92E-36 | 4.08E-35 |
| Mks1       | 14  | 8.011799436 | 16.92719507 | 8.915395637  | 1.97E-36 | 4.19E-35 |
| Arhgap20   | 99  | 11.08032051 | 9.10635714  | -1.973963365 | 1.97E-36 | 4.19E-35 |
| Slc22a17   | 60  | 4.772859411 | 1.834461618 | -2.938397793 | 2.43E-36 | 5.16E-35 |
| Rgs6       | 51  | 39.35606647 | 30.78405462 | -8.572011853 | 2.91E-36 | 6.17E-35 |
| Wscd2      | 3   | 74.45527097 | 44.87347203 | -29.58179894 | 3.49E-36 | 7.37E-35 |
| Mir8117    | 9   | 85.08817691 | 67.1349815  | -17.95319541 | 3.83E-36 | 8.08E-35 |
| Erich5     | 3   | 31.96662619 | 9.969803234 | -21.99682296 | 4.13E-36 | 8.72E-35 |
| Gm4598     | 10  | 40.65212428 | 25.56734637 | -15.08477791 | 4.61E-36 | 9.71E-35 |
| Six2       | 140 | 28.84768154 | 25.95163864 | -2.896042908 | 4.91E-36 | 1.03E-34 |
| Cd248      | 58  | 7.417296451 | 4.901960972 | -2.51533548  | 7.92E-36 | 1.66E-34 |
| Tpte       | 3   | 64.74782657 | 28.1838703  | -36.56395627 | 1.07E-35 | 2.24E-34 |
| Crhbp      | 8   | 67.01298672 | 47.52860405 | -19.48438266 | 1.11E-35 | 2.32E-34 |
| 130014A18F | 7   | 47.08506855 | 21.69122152 | -25.39384703 | 1.19E-35 | 2.49E-34 |
| Mcc        | 53  | 5.182907925 | 2.222692626 | -2.960215298 | 1.77E-35 | 3.69E-34 |
| Cabp2      | 11  | 91.54830424 | 76.86992997 | -14.67837426 | 1.88E-35 | 3.92E-34 |
| Mir7231    | 3   | 76.53774492 | 54.2289413  | -22.30880362 | 2.00E-35 | 4.16E-34 |
| Klf14      | 105 | 58.58862359 | 63.20426119 | 4.615637604  | 2.69E-35 | 5.59E-34 |
| Man1c1     | 104 | 3.354239842 | 6.080529995 | 2.726290153  | 4.13E-35 | 8.57E-34 |

|            |     |             |             |              |          |          |
|------------|-----|-------------|-------------|--------------|----------|----------|
| Nkd1       | 105 | 30.5313572  | 26.02759484 | -4.50376236  | 4.16E-35 | 8.62E-34 |
| Mctp1      | 80  | 7.470517592 | 6.24487403  | -1.225643562 | 4.30E-35 | 8.89E-34 |
| Twist1     | 86  | 53.80660824 | 60.59607905 | 6.789470807  | 5.03E-35 | 1.04E-33 |
| Gpr35      | 3   | 84.8590959  | 50.2635104  | -34.5955855  | 5.08E-35 | 1.05E-33 |
| Kcns3      | 54  | 34.66849974 | 28.77254582 | -5.895953924 | 5.10E-35 | 1.05E-33 |
| Pak7       | 11  | 48.54257513 | 32.07054994 | -16.47202519 | 7.16E-35 | 1.47E-33 |
| Mcts2      | 18  | 74.44983187 | 62.50744267 | -11.9423892  | 7.42E-35 | 1.53E-33 |
| Prkar1b    | 53  | 19.20609527 | 13.19013263 | -6.015962636 | 9.10E-35 | 1.87E-33 |
| Glp1r      | 30  | 13.37541516 | 9.351879588 | -4.023535576 | 1.24E-34 | 2.53E-33 |
| Adgrg2     | 33  | 28.01243264 | 17.81879947 | -10.19363317 | 1.25E-34 | 2.56E-33 |
| Brinp2     | 21  | 32.4761124  | 42.54007826 | 10.06396586  | 1.37E-34 | 2.81E-33 |
| Tacc1      | 82  | 3.730030291 | 1.723845753 | -2.006184538 | 1.45E-34 | 2.95E-33 |
| Ptgs2os    | 17  | 6.62214383  | 2.396129427 | -4.226014403 | 1.53E-34 | 3.12E-33 |
| Fam105a    | 53  | 5.491162583 | 10.82110401 | 5.32994143   | 1.56E-34 | 3.17E-33 |
| St6galnac2 | 78  | 7.435291095 | 4.390547273 | -3.044743821 | 1.86E-34 | 3.78E-33 |
| Barx1      | 113 | 57.68470067 | 62.73538836 | 5.050687686  | 1.98E-34 | 4.01E-33 |
| Kdr        | 23  | 10.77537766 | 19.07052794 | 8.295150282  | 2.39E-34 | 4.84E-33 |
| Amph       | 23  | 18.4559215  | 13.11154492 | -5.344376582 | 2.66E-34 | 5.38E-33 |
| Pcdh18     | 23  | 7.115116016 | 2.496891623 | -4.618224394 | 4.48E-34 | 9.05E-33 |
| Ankrd33b   | 53  | 21.30320391 | 16.61599125 | -4.687212667 | 4.59E-34 | 9.26E-33 |
| Ncoa1      | 88  | 3.014374883 | 0.99974221  | -2.014632673 | 4.66E-34 | 9.40E-33 |
| Wnt2b      | 79  | 9.50283341  | 7.900283815 | -1.602549594 | 4.95E-34 | 9.97E-33 |
| Sod3       | 5   | 59.09509771 | 35.83319482 | -23.26190289 | 4.96E-34 | 9.97E-33 |
| Agxt       | 11  | 92.1771279  | 80.94140084 | -11.23572706 | 6.55E-34 | 1.31E-32 |
| Hecw2      | 59  | 13.05877701 | 20.68486328 | 7.626086264  | 7.03E-34 | 1.41E-32 |
| Pnliprp2   | 8   | 65.15490077 | 49.18882635 | -15.96607443 | 8.00E-34 | 1.60E-32 |
| Frmpd1os   | 3   | 71.23695976 | 27.3268827  | -43.91007706 | 8.13E-34 | 1.63E-32 |
| Mir7023    | 12  | 87.88861885 | 72.80900603 | -15.07961282 | 9.72E-34 | 1.94E-32 |
| Prickle2   | 52  | 25.72754987 | 20.76092643 | -4.966623441 | 1.16E-33 | 2.32E-32 |
| Atp2b2     | 78  | 34.93075438 | 29.21107961 | -5.719674764 | 1.27E-33 | 2.53E-32 |
| Npas4      | 28  | 48.57611239 | 43.26772439 | -5.308388008 | 1.36E-33 | 2.71E-32 |
| Rgs20      | 39  | 6.956929159 | 2.361139066 | -4.595790094 | 1.40E-33 | 2.77E-32 |
| Padi2      | 3   | 20.71522732 | 3.799316337 | -16.91591099 | 1.56E-33 | 3.09E-32 |
| Kcnk18     | 15  | 82.00334671 | 68.85385959 | -13.14948711 | 1.85E-33 | 3.66E-32 |

|           |     |             |             |              |          |          |
|-----------|-----|-------------|-------------|--------------|----------|----------|
| Neurog1   | 28  | 32.47499953 | 22.94757739 | -9.527422135 | 1.87E-33 | 3.70E-32 |
| Otogl     | 3   | 75.65242225 | 42.73289527 | -32.91952698 | 1.99E-33 | 3.93E-32 |
| Adamts8   | 72  | 10.04233853 | 15.57181601 | 5.529477474  | 2.57E-33 | 5.07E-32 |
| Zcchc3    | 10  | 33.70544276 | 57.11890221 | 23.41345945  | 2.76E-33 | 5.44E-32 |
| Spsb4     | 89  | 4.137211014 | 2.653822094 | -1.483388919 | 3.12E-33 | 6.14E-32 |
| Atp12a    | 29  | 13.78341893 | 8.503698641 | -5.279720292 | 3.14E-33 | 6.17E-32 |
| Fyn       | 87  | 2.919665083 | 1.350370745 | -1.569294337 | 3.35E-33 | 6.56E-32 |
| Tmprss6   | 5   | 89.83071687 | 62.29196736 | -27.53874951 | 3.60E-33 | 7.06E-32 |
| Ptprd     | 62  | 5.708656921 | 2.867961249 | -2.840695673 | 4.32E-33 | 8.46E-32 |
| Gm2694    | 45  | 55.61049053 | 64.28985558 | 8.679365041  | 4.46E-33 | 8.72E-32 |
| Ccdc27    | 10  | 53.88649751 | 35.11087414 | -18.77562337 | 6.38E-33 | 1.24E-31 |
| Fzd3      | 103 | 3.527382169 | 1.92383733  | -1.603544839 | 7.19E-33 | 1.40E-31 |
| Pou3f3    | 127 | 46.94340718 | 51.63637095 | 4.692963767  | 7.65E-33 | 1.49E-31 |
| Gimap1    | 6   | 36.6034669  | 12.03087202 | -24.57259487 | 8.23E-33 | 1.60E-31 |
| Satb2     | 3   | 36.41231593 | 8.134371159 | -28.27794477 | 8.57E-33 | 1.66E-31 |
| Klf15     | 60  | 14.98927963 | 10.55496005 | -4.434319573 | 9.94E-33 | 1.93E-31 |
| Msx1      | 47  | 33.53618087 | 27.74751629 | -5.788664573 | 1.05E-32 | 2.03E-31 |
| Apoe      | 19  | 17.75153076 | 7.474660622 | -10.27687014 | 1.08E-32 | 2.10E-31 |
| Slc25a21  | 23  | 55.83868083 | 66.03433507 | 10.19565423  | 1.11E-32 | 2.14E-31 |
| Edn2      | 16  | 15.60420997 | 5.441767849 | -10.16244212 | 1.16E-32 | 2.23E-31 |
| Mga       | 18  | 3.386849799 | 11.91879528 | 8.531945477  | 1.25E-32 | 2.40E-31 |
| Shc3      | 58  | 51.92720102 | 61.48062618 | 9.553425154  | 1.28E-32 | 2.46E-31 |
| Nkain4    | 12  | 28.24128421 | 15.87970107 | -12.36158313 | 1.31E-32 | 2.51E-31 |
| Kcnn3     | 8   | 49.97051867 | 64.44285144 | 14.47233277  | 1.35E-32 | 2.59E-31 |
| Ldhd      | 6   | 28.9951442  | 11.79097043 | -17.20417377 | 1.39E-32 | 2.66E-31 |
| Aqp5      | 90  | 19.57488936 | 24.14476239 | 4.569873026  | 1.81E-32 | 3.46E-31 |
| Sox30     | 110 | 51.52263349 | 56.17901551 | 4.656382021  | 2.12E-32 | 4.05E-31 |
| Fam81a    | 82  | 3.370698149 | 1.510645921 | -1.860052228 | 2.27E-32 | 4.34E-31 |
| Clec2l    | 79  | 6.107312751 | 4.028382245 | -2.078930507 | 2.39E-32 | 4.55E-31 |
| Hcn1      | 50  | 50.07485273 | 58.51619647 | 8.44134374   | 2.52E-32 | 4.80E-31 |
| Frem2     | 26  | 44.58126769 | 55.87266329 | 11.2913956   | 2.75E-32 | 5.22E-31 |
| Nkx2-2os  | 44  | 39.29924789 | 47.65249181 | 8.35324392   | 2.92E-32 | 5.54E-31 |
| 30015N05F | 21  | 27.9206582  | 18.04588164 | -9.87477657  | 3.59E-32 | 6.80E-31 |
| Sowahb    | 72  | 5.525174278 | 3.291318109 | -2.233856169 | 3.73E-32 | 7.07E-31 |

|            |     |             |             |              |          |          |
|------------|-----|-------------|-------------|--------------|----------|----------|
| Tomm20     | 48  | 13.97345391 | 10.04348665 | -3.929967261 | 5.36E-32 | 1.01E-30 |
| Pak1       | 5   | 7.745002206 | 29.15800691 | 21.41300471  | 5.56E-32 | 1.05E-30 |
| Syk        | 62  | 9.672491072 | 5.631330395 | -4.041160677 | 5.67E-32 | 1.07E-30 |
| Irf6       | 28  | 13.84707625 | 8.038683603 | -5.808392652 | 6.27E-32 | 1.18E-30 |
| Gm16532    | 3   | 30.5542737  | 7.39078746  | -23.16348624 | 6.49E-32 | 1.22E-30 |
| Cmtm1      | 6   | 89.35185185 | 68.67326499 | -20.67858686 | 6.52E-32 | 1.23E-30 |
| Fgf5       | 47  | 17.29987022 | 23.29888476 | 5.999014542  | 7.64E-32 | 1.43E-30 |
| !30112D13F | 12  | 76.31369362 | 65.04888464 | -11.26480898 | 8.13E-32 | 1.52E-30 |
| Rbfox1     | 12  | 48.18927636 | 36.2146564  | -11.97461996 | 8.60E-32 | 1.61E-30 |
| Sdk2       | 95  | 52.60746491 | 57.49193728 | 4.884472365  | 8.85E-32 | 1.65E-30 |
| Tmem223    | 20  | 48.16778045 | 57.38551496 | 9.217734512  | 9.01E-32 | 1.68E-30 |
| Bicc1      | 108 | 2.27004103  | 4.157169929 | 1.8871289    | 1.19E-31 | 2.22E-30 |
| Gm11733    | 12  | 62.73590618 | 48.17572095 | -14.56018523 | 1.39E-31 | 2.59E-30 |
| Gm10863    | 11  | 75.29424362 | 60.18524217 | -15.10900146 | 1.40E-31 | 2.60E-30 |
| Phc2       | 155 | 10.71530434 | 14.41014633 | 3.694841994  | 1.40E-31 | 2.60E-30 |
| Glipr2     | 38  | 7.301620096 | 14.02083179 | 6.719211691  | 1.57E-31 | 2.92E-30 |
| Hcn4       | 170 | 8.928120304 | 7.514420218 | -1.413700086 | 1.61E-31 | 2.99E-30 |
| Tspan33    | 64  | 4.959265712 | 2.326561333 | -2.632704379 | 1.63E-31 | 3.01E-30 |
| Mir1191b   | 8   | 24.07999555 | 8.563070765 | -15.51692479 | 1.91E-31 | 3.53E-30 |
| Al854703   | 22  | 17.08818881 | 10.8452985  | -6.242890313 | 2.01E-31 | 3.72E-30 |
| Ckm        | 9   | 65.826334   | 48.08970792 | -17.73662608 | 2.03E-31 | 3.75E-30 |
| Snph       | 46  | 6.22659042  | 12.26555261 | 6.038962186  | 2.05E-31 | 3.78E-30 |
| Kcnq1      | 48  | 7.297391697 | 4.035974683 | -3.261417014 | 2.24E-31 | 4.12E-30 |
| Sowaha     | 9   | 45.83616641 | 60.54737177 | 14.71120536  | 2.30E-31 | 4.22E-30 |
| Slc9a2     | 126 | 3.229812857 | 1.327617201 | -1.902195656 | 2.37E-31 | 4.36E-30 |
| Map7d2     | 69  | 22.28413542 | 16.59678478 | -5.687350635 | 2.45E-31 | 4.49E-30 |
| Mb21d1     | 25  | 27.0643281  | 20.62114628 | -6.443181824 | 2.47E-31 | 4.52E-30 |
| Oprd1      | 79  | 17.05772628 | 12.17389424 | -4.883832047 | 2.48E-31 | 4.53E-30 |
| H2-Q4      | 35  | 5.520788403 | 2.255250772 | -3.265537631 | 2.81E-31 | 5.14E-30 |
| Gpr4       | 15  | 11.18136975 | 5.870820338 | -5.310549409 | 2.85E-31 | 5.19E-30 |
| Gng4       | 71  | 8.572397785 | 5.623040457 | -2.949357329 | 2.91E-31 | 5.29E-30 |
| Mir5120    | 2   | 76.41012337 | 40.19416742 | -36.21595596 | 2.98E-31 | 5.41E-30 |
| Atg9b      | 2   | 79.5023511  | 29.65528222 | -49.84706887 | 2.98E-31 | 5.41E-30 |
| !30554H23F | 19  | 54.33878133 | 62.85970772 | 8.520926393  | 3.00E-31 | 5.44E-30 |



|            |     |             |             |              |          |          |
|------------|-----|-------------|-------------|--------------|----------|----------|
| Dgkh       | 58  | 28.3469439  | 23.10218129 | -5.244762613 | 3.16E-31 | 5.72E-30 |
| Peg13      | 13  | 40.9710478  | 59.7367686  | 18.76572081  | 3.68E-31 | 6.66E-30 |
| Tekt5      | 28  | 24.30775919 | 14.90380884 | -9.403950353 | 3.70E-31 | 6.69E-30 |
| Scin       | 18  | 9.321419229 | 3.55723518  | -5.764184048 | 3.73E-31 | 6.73E-30 |
| Tnfsf11    | 36  | 26.79640516 | 33.81728924 | 7.020884073  | 3.88E-31 | 6.99E-30 |
| Rnf165     | 72  | 42.38492085 | 48.56559006 | 6.180669205  | 4.29E-31 | 7.72E-30 |
| Fgd5       | 9   | 76.74089904 | 60.06653457 | -16.67436447 | 4.54E-31 | 8.17E-30 |
| '30409E04F | 34  | 6.964331435 | 4.554659857 | -2.409671577 | 4.92E-31 | 8.84E-30 |
| Clstn2     | 75  | 21.65743741 | 27.05912939 | 5.401691983  | 5.00E-31 | 8.97E-30 |
| Atcayos    | 8   | 18.62455724 | 8.455703084 | -10.16885415 | 5.43E-31 | 9.73E-30 |
| Hoxa13     | 45  | 22.68224012 | 17.96939084 | -4.712849282 | 5.79E-31 | 1.04E-29 |
| Lrp3       | 119 | 6.467060655 | 9.661099327 | 3.194038672  | 5.88E-31 | 1.05E-29 |
| Pde1c      | 4   | 19.95916566 | 4.692970223 | -15.26619543 | 6.58E-31 | 1.17E-29 |
| .30019P16F | 19  | 6.380147957 | 2.403441485 | -3.976706472 | 6.67E-31 | 1.19E-29 |
| Zfp275     | 39  | 21.79498147 | 13.28598853 | -8.508992943 | 7.82E-31 | 1.39E-29 |
| Gipc2      | 44  | 4.409755667 | 1.758657869 | -2.651097798 | 7.96E-31 | 1.42E-29 |
| Tsk5       | 6   | 73.53279632 | 49.24287515 | -24.28992117 | 9.03E-31 | 1.60E-29 |
| Prmt8      | 78  | 30.23510423 | 26.24685006 | -3.988254175 | 1.01E-30 | 1.78E-29 |
| Mir148a    | 70  | 26.48195557 | 23.33933476 | -3.14262081  | 1.08E-30 | 1.91E-29 |
| Plec       | 82  | 13.5390366  | 8.505303643 | -5.033732957 | 1.13E-30 | 1.99E-29 |
| Prph2      | 16  | 87.49816762 | 76.96685433 | -10.53131329 | 1.23E-30 | 2.17E-29 |
| Hrh1       | 50  | 14.67805208 | 19.32480521 | 4.646753131  | 1.29E-30 | 2.27E-29 |
| Tacr3      | 21  | 44.63330511 | 36.67504642 | -7.958258694 | 1.60E-30 | 2.82E-29 |
| Ica1l      | 121 | 2.617309926 | 1.437626639 | -1.179683286 | 1.62E-30 | 2.85E-29 |
| Tunar      | 33  | 51.49846158 | 60.03773762 | 8.539276045  | 1.82E-30 | 3.21E-29 |
| Arhgdig    | 74  | 5.258964565 | 2.502516562 | -2.756448003 | 1.86E-30 | 3.28E-29 |
| Amer3      | 47  | 18.46198597 | 14.14321912 | -4.318766852 | 2.00E-30 | 3.51E-29 |
| Asz1       | 17  | 89.11353131 | 79.66913962 | -9.44439169  | 2.30E-30 | 4.03E-29 |
| Igdcc4     | 31  | 4.587912113 | 2.034389744 | -2.55352237  | 2.39E-30 | 4.19E-29 |
| Lrrc6      | 10  | 17.55345432 | 9.184403179 | -8.369051145 | 2.60E-30 | 4.55E-29 |
| '00028K03F | 6   | 73.32851915 | 85.99842871 | 12.66990956  | 2.77E-30 | 4.84E-29 |
| Vax1       | 61  | 27.24737547 | 23.80879733 | -3.438578135 | 3.49E-30 | 6.09E-29 |
| Zfp947     | 6   | 21.38964093 | 7.898252124 | -13.49138881 | 3.83E-30 | 6.67E-29 |
| Gbx1       | 176 | 12.17067983 | 10.31387658 | -1.856803255 | 3.91E-30 | 6.80E-29 |

|            |     |             |             |              |          |          |
|------------|-----|-------------|-------------|--------------|----------|----------|
| Pcsk9      | 12  | 15.39200464 | 7.579067725 | -7.812936916 | 4.32E-30 | 7.51E-29 |
| Olf279     | 3   | 67.56901766 | 33.35467606 | -34.2143416  | 4.57E-30 | 7.93E-29 |
| Prdm13     | 18  | 25.21379173 | 42.90696435 | 17.69317262  | 4.58E-30 | 7.94E-29 |
| Crlf2      | 30  | 9.436852739 | 15.1910881  | 5.754235365  | 5.83E-30 | 1.01E-28 |
| Hoxb13     | 25  | 20.15717521 | 11.82043415 | -8.336741059 | 5.91E-30 | 1.02E-28 |
| Map10      | 50  | 61.80939388 | 68.2563163  | 6.446922421  | 6.20E-30 | 1.07E-28 |
| Mmp11      | 30  | 11.37965631 | 7.422650102 | -3.95700621  | 6.35E-30 | 1.10E-28 |
| Jakmip3    | 18  | 17.43364916 | 7.674054035 | -9.759595124 | 1.03E-29 | 1.78E-28 |
| Prrg1      | 20  | 23.66834016 | 13.65768782 | -10.01065235 | 1.09E-29 | 1.88E-28 |
| Col6a6     | 6   | 91.04038492 | 74.83438839 | -16.20599653 | 1.13E-29 | 1.95E-28 |
| Kank4      | 70  | 12.0356572  | 9.055158352 | -2.980498852 | 1.21E-29 | 2.08E-28 |
| 4-Mar      | 17  | 11.74902737 | 3.648365713 | -8.100661652 | 1.22E-29 | 2.09E-28 |
| Gabra2     | 8   | 36.78135629 | 24.47183773 | -12.30951856 | 1.28E-29 | 2.20E-28 |
| Crmp1      | 144 | 54.44318574 | 58.75108747 | 4.307901733  | 1.44E-29 | 2.46E-28 |
| Nos1       | 10  | 85.01572275 | 70.85109948 | -14.16462328 | 1.51E-29 | 2.59E-28 |
| Gprin2     | 48  | 20.98641311 | 29.08303768 | 8.096624568  | 1.64E-29 | 2.80E-28 |
| Prss21     | 2   | 79.19254658 | 36.41328228 | -42.7792643  | 2.02E-29 | 3.45E-28 |
| Slc6a14    | 10  | 60.9377904  | 41.56448173 | -19.37330867 | 2.13E-29 | 3.64E-28 |
| Neto1      | 13  | 34.30464334 | 19.69427008 | -14.61037326 | 2.51E-29 | 4.27E-28 |
| Wscd1      | 33  | 41.56359467 | 52.54706902 | 10.98347435  | 2.55E-29 | 4.33E-28 |
| Gm12992    | 78  | 65.08560729 | 70.24680855 | 5.161201253  | 2.63E-29 | 4.46E-28 |
| Col23a1    | 82  | 6.709687211 | 5.268375111 | -1.4413121   | 2.65E-29 | 4.50E-28 |
| Sertad4    | 66  | 2.907915708 | 1.035974166 | -1.871941543 | 3.13E-29 | 5.30E-28 |
| Rph3a      | 15  | 19.98399519 | 11.2395908  | -8.744404387 | 3.29E-29 | 5.58E-28 |
| Prrt2      | 19  | 11.07484337 | 4.851884079 | -6.222959292 | 4.02E-29 | 6.79E-28 |
| Nkx1-1     | 86  | 44.02267539 | 39.64204127 | -4.380634119 | 4.72E-29 | 7.97E-28 |
| Pde4a      | 56  | 6.37663397  | 2.981187584 | -3.395446385 | 4.76E-29 | 8.02E-28 |
| Mir203     | 99  | 8.748211195 | 6.277635912 | -2.470575282 | 5.05E-29 | 8.51E-28 |
| St14       | 73  | 5.841646171 | 3.946666593 | -1.894979579 | 5.57E-29 | 9.36E-28 |
| Ovol1      | 108 | 12.42009375 | 10.78197435 | -1.638119401 | 5.88E-29 | 9.88E-28 |
| Snhg18     | 6   | 43.13130972 | 64.35714774 | 21.22583802  | 6.01E-29 | 1.01E-27 |
| Icam1      | 8   | 19.72396581 | 7.258158953 | -12.46580686 | 7.40E-29 | 1.24E-27 |
| I33432K03F | 4   | 76.44101147 | 48.9981408  | -27.44287067 | 8.28E-29 | 1.39E-27 |
| Nkx2-5     | 12  | 23.76964808 | 10.30830595 | -13.46134213 | 8.55E-29 | 1.43E-27 |

|            |     |             |             |              |          |          |
|------------|-----|-------------|-------------|--------------|----------|----------|
| Gspt2      | 24  | 28.37544525 | 16.94850102 | -11.42694423 | 1.00E-28 | 1.67E-27 |
| Gprin1     | 130 | 4.250435506 | 3.000819458 | -1.249616048 | 1.14E-28 | 1.90E-27 |
| Gm15881    | 3   | 85.4016377  | 54.78156243 | -30.62007526 | 1.23E-28 | 2.04E-27 |
| Ano1       | 19  | 57.08206057 | 67.15372506 | 10.07166449  | 1.33E-28 | 2.22E-27 |
| Gde1       | 51  | 6.064752814 | 4.206423353 | -1.858329461 | 1.34E-28 | 2.24E-27 |
| Tcf7l2     | 61  | 7.45115879  | 2.458351704 | -4.992807086 | 1.42E-28 | 2.37E-27 |
| Frmf5      | 55  | 7.601342031 | 4.159849626 | -3.441492405 | 1.48E-28 | 2.46E-27 |
| Barhl1     | 29  | 21.79734176 | 31.82249967 | 10.02515791  | 1.54E-28 | 2.56E-27 |
| Slc30a3    | 57  | 9.822153791 | 13.3243723  | 3.502218509  | 1.56E-28 | 2.59E-27 |
| Tagln3     | 19  | 46.1031336  | 57.91682658 | 11.81369298  | 1.62E-28 | 2.68E-27 |
| Gm6307     | 11  | 30.54774924 | 20.01529076 | -10.53245847 | 1.70E-28 | 2.81E-27 |
| Rnf138rt1  | 16  | 42.64363409 | 56.11111807 | 13.46748397  | 1.71E-28 | 2.82E-27 |
| Msrp3      | 70  | 4.677949875 | 2.290440312 | -2.387509564 | 1.72E-28 | 2.84E-27 |
| Gipc3      | 34  | 3.53110677  | 7.573067957 | 4.041961187  | 1.80E-28 | 2.96E-27 |
| Enpp7      | 5   | 84.6425197  | 66.04232808 | -18.60019162 | 1.92E-28 | 3.15E-27 |
| Gja3       | 70  | 6.187545152 | 9.843103903 | 3.655558751  | 1.95E-28 | 3.20E-27 |
| Ptpdc1     | 99  | 3.205671639 | 1.952346232 | -1.253325407 | 2.00E-28 | 3.28E-27 |
| Sdc2       | 8   | 11.13852428 | 4.530597761 | -6.607926523 | 2.06E-28 | 3.38E-27 |
| Slc2a12    | 24  | 25.29453833 | 18.32893051 | -6.965607822 | 2.11E-28 | 3.46E-27 |
| Pcsk5      | 46  | 31.68704934 | 27.35807945 | -4.328969898 | 2.13E-28 | 3.49E-27 |
| Tm6sf1     | 47  | 23.37650887 | 19.40566301 | -3.970845861 | 2.34E-28 | 3.83E-27 |
| 130419C18F | 153 | 4.100171209 | 2.898987929 | -1.20118328  | 2.41E-28 | 3.93E-27 |
| Npy5r      | 17  | 53.10391377 | 63.8347718  | 10.73085803  | 2.51E-28 | 4.09E-27 |
| Cdh4       | 53  | 55.30026259 | 60.6388893  | 5.338626707  | 2.84E-28 | 4.63E-27 |
| Sh3rf3     | 85  | 16.78481771 | 13.71369861 | -3.071119102 | 2.90E-28 | 4.71E-27 |
| Trpc4      | 11  | 33.1660613  | 22.2802883  | -10.885773   | 3.22E-28 | 5.24E-27 |
| Mir7678    | 6   | 88.46525628 | 74.7765611  | -13.68869518 | 3.31E-28 | 5.37E-27 |
| Nlgn1      | 17  | 40.87374568 | 30.04300722 | -10.83073846 | 3.41E-28 | 5.54E-27 |
| 430060I03R | 2   | 89.93899937 | 59.14427899 | -30.79472038 | 3.45E-28 | 5.60E-27 |
| Ptger3     | 31  | 30.63495829 | 37.26204722 | 6.627088926  | 4.07E-28 | 6.58E-27 |
| Nrn1       | 38  | 18.53350317 | 25.15215275 | 6.618649578  | 4.45E-28 | 7.19E-27 |
| Al646519   | 12  | 16.71434328 | 30.42779746 | 13.71345418  | 4.46E-28 | 7.20E-27 |
| Cplx1      | 47  | 22.67522523 | 30.63345848 | 7.95823325   | 4.48E-28 | 7.23E-27 |
| Twist2     | 73  | 25.67295452 | 30.6192911  | 4.946336579  | 4.60E-28 | 7.41E-27 |

|            |    |             |             |              |          |          |
|------------|----|-------------|-------------|--------------|----------|----------|
| Cyp2r1     | 48 | 49.83813586 | 57.71295823 | 7.874822367  | 4.74E-28 | 7.63E-27 |
| Galr1      | 8  | 28.38803777 | 12.09267787 | -16.2953599  | 4.82E-28 | 7.74E-27 |
| Mir375     | 26 | 16.81121498 | 26.75830048 | 9.947085501  | 5.75E-28 | 9.23E-27 |
| Col16a1    | 7  | 19.98151567 | 7.655506652 | -12.32600902 | 5.88E-28 | 9.43E-27 |
| Gm715      | 45 | 31.69634149 | 24.59998138 | -7.096360103 | 6.04E-28 | 9.67E-27 |
| 3-Sep      | 82 | 4.467062591 | 7.373756189 | 2.906693599  | 6.32E-28 | 1.01E-26 |
| Stpg2      | 13 | 41.63454212 | 57.04652645 | 15.41198432  | 6.65E-28 | 1.06E-26 |
| Cpxm2      | 33 | 35.09737661 | 30.26270947 | -4.834667144 | 6.68E-28 | 1.07E-26 |
| Adamts7    | 37 | 4.692133485 | 2.493907345 | -2.19822614  | 7.09E-28 | 1.13E-26 |
| Dysf       | 20 | 13.68864225 | 23.19096869 | 9.502326438  | 7.10E-28 | 1.13E-26 |
| Adra1b     | 68 | 30.46158585 | 26.06276263 | -4.398823223 | 7.16E-28 | 1.14E-26 |
| Slco3a1    | 52 | 20.50968979 | 26.42905976 | 5.919369973  | 7.51E-28 | 1.19E-26 |
| Gareml     | 57 | 17.51227625 | 13.11207696 | -4.400199286 | 7.55E-28 | 1.20E-26 |
| Mir5099    | 8  | 93.72833438 | 79.74221583 | -13.98611856 | 8.28E-28 | 1.31E-26 |
| i00014C23F | 43 | 31.47660684 | 27.04358022 | -4.433026618 | 8.74E-28 | 1.39E-26 |
| Myo18b     | 8  | 90.32343078 | 77.22038035 | -13.10305043 | 8.77E-28 | 1.39E-26 |
| Calcr1     | 6  | 11.42448983 | 3.518443767 | -7.906046065 | 9.26E-28 | 1.46E-26 |
| Ntsr2      | 23 | 20.48206502 | 12.86254901 | -7.619516007 | 9.75E-28 | 1.54E-26 |
| Zfx        | 93 | 20.80715364 | 16.04723546 | -4.759918175 | 1.08E-27 | 1.70E-26 |
| Vsig8      | 2  | 95.29645191 | 62.27608008 | -33.02037183 | 1.10E-27 | 1.73E-26 |
| Asb18      | 3  | 76.75884924 | 53.22530069 | -23.53354855 | 1.22E-27 | 1.91E-26 |
| Itga9      | 84 | 5.450339952 | 3.332514661 | -2.117825291 | 1.38E-27 | 2.17E-26 |
| Zbtb16     | 55 | 21.42701631 | 16.51771573 | -4.909300584 | 1.48E-27 | 2.32E-26 |
| Cyp46a1    | 41 | 5.236460443 | 2.102978673 | -3.13348177  | 1.49E-27 | 2.33E-26 |
| Plcd1      | 54 | 31.81731949 | 36.97048404 | 5.15316455   | 1.48E-27 | 2.33E-26 |
| Mrpl19     | 19 | 23.42065362 | 17.13868387 | -6.281969756 | 1.82E-27 | 2.86E-26 |
| '00072O05F | 6  | 83.13814522 | 63.60312603 | -19.53501918 | 1.89E-27 | 2.96E-26 |
| Matn3      | 42 | 5.627623597 | 3.218017586 | -2.409606012 | 2.53E-27 | 3.96E-26 |
| Alox5      | 9  | 33.93215874 | 52.23349798 | 18.30133925  | 2.60E-27 | 4.05E-26 |
| Serpine2   | 94 | 4.944582521 | 2.948317214 | -1.996265307 | 2.60E-27 | 4.06E-26 |
| Lrrn1      | 39 | 31.17968389 | 23.97048956 | -7.209194332 | 2.82E-27 | 4.39E-26 |
| Col6a5     | 11 | 28.03101701 | 17.28947335 | -10.74154367 | 2.91E-27 | 4.52E-26 |
| Plcl1      | 56 | 5.899092959 | 3.41098147  | -2.488111489 | 3.06E-27 | 4.76E-26 |
| Hspb9      | 22 | 31.87863375 | 41.86786541 | 9.989231655  | 3.48E-27 | 5.40E-26 |

|            |     |             |             |              |          |          |
|------------|-----|-------------|-------------|--------------|----------|----------|
| Traf1      | 7   | 37.04816093 | 58.39108715 | 21.34292622  | 3.82E-27 | 5.93E-26 |
| Ptprn2     | 56  | 17.09394603 | 22.96334188 | 5.869395853  | 4.42E-27 | 6.84E-26 |
| St8sia2    | 54  | 42.38834244 | 48.6756706  | 6.287328166  | 4.81E-27 | 7.44E-26 |
| Col7a1     | 12  | 33.65470308 | 11.87902164 | -21.77568144 | 5.06E-27 | 7.83E-26 |
| Klk8       | 11  | 18.82224711 | 4.25838937  | -14.56385775 | 5.26E-27 | 8.13E-26 |
| Wnt3a      | 72  | 9.825891825 | 7.161856391 | -2.664035434 | 5.40E-27 | 8.34E-26 |
| L10032F04F | 81  | 18.50422884 | 22.15655659 | 3.65232775   | 6.64E-27 | 1.02E-25 |
| Pid1       | 65  | 25.70826323 | 21.36136737 | -4.346895863 | 6.78E-27 | 1.04E-25 |
| Grin3a     | 30  | 47.92061537 | 55.85219483 | 7.931579467  | 7.32E-27 | 1.13E-25 |
| Ppp1r26    | 77  | 5.313052013 | 2.745208241 | -2.567843772 | 7.70E-27 | 1.18E-25 |
| Zfp783     | 60  | 52.48534211 | 58.07173947 | 5.586397355  | 7.74E-27 | 1.19E-25 |
| Steap4     | 15  | 15.31605546 | 7.239154975 | -8.076900482 | 8.02E-27 | 1.23E-25 |
| Mcf2       | 20  | 34.69585315 | 21.05591618 | -13.63993697 | 8.14E-27 | 1.25E-25 |
| Hexa       | 45  | 3.222018217 | 1.467456986 | -1.754561231 | 8.59E-27 | 1.31E-25 |
| Acot12     | 33  | 16.38521619 | 11.10925369 | -5.275962495 | 8.75E-27 | 1.34E-25 |
| Asic2      | 122 | 52.2783573  | 56.66124182 | 4.38288452   | 9.08E-27 | 1.39E-25 |
| Ctsz       | 21  | 4.677789778 | 1.462738998 | -3.215050781 | 9.14E-27 | 1.39E-25 |
| Daam2      | 9   | 19.91221734 | 31.33518193 | 11.42296459  | 1.15E-26 | 1.75E-25 |
| Mlxipl     | 25  | 9.089280975 | 15.03608439 | 5.94680341   | 1.21E-26 | 1.84E-25 |
| Sdsl       | 4   | 70.27411015 | 47.26677378 | -23.00733637 | 1.31E-26 | 1.99E-25 |
| Gm17762    | 24  | 6.989940917 | 1.139247105 | -5.850693811 | 1.39E-26 | 2.11E-25 |
| Tiam1      | 11  | 14.1934695  | 5.12220029  | -9.071269212 | 1.39E-26 | 2.12E-25 |
| Slc1a6     | 19  | 13.79171748 | 7.655161989 | -6.136555493 | 1.51E-26 | 2.29E-25 |
| '00018B24F | 12  | 89.41780657 | 80.73422667 | -8.683579897 | 1.54E-26 | 2.34E-25 |
| Hpgd       | 9   | 38.8264525  | 26.0096864  | -12.81676609 | 1.59E-26 | 2.41E-25 |
| Sirpa      | 19  | 16.37981642 | 10.88565834 | -5.494158081 | 1.61E-26 | 2.44E-25 |
| Ago4       | 144 | 3.117605113 | 1.966798327 | -1.150806787 | 1.80E-26 | 2.71E-25 |
| '00019D03F | 41  | 12.58770108 | 8.421148365 | -4.166552711 | 1.84E-26 | 2.77E-25 |
| Pacsin1    | 64  | 12.33544418 | 17.62814139 | 5.292697214  | 1.88E-26 | 2.84E-25 |
| Speg       | 78  | 20.76968361 | 24.14058671 | 3.370903104  | 2.18E-26 | 3.28E-25 |
| Unc80      | 68  | 24.50634903 | 19.8030149  | -4.703334135 | 2.20E-26 | 3.30E-25 |
| Bhlhe23    | 48  | 24.29832497 | 32.14938843 | 7.851063464  | 2.39E-26 | 3.59E-25 |
| Rnf157     | 142 | 3.593105285 | 2.35504208  | -1.238063205 | 2.48E-26 | 3.72E-25 |
| Sema6a     | 18  | 9.944820362 | 3.082530793 | -6.862289569 | 2.68E-26 | 4.01E-25 |

|            |     |             |             |              |          |          |
|------------|-----|-------------|-------------|--------------|----------|----------|
| Gm11186    | 4   | 88.85017435 | 69.03420644 | -19.81596791 | 3.34E-26 | 5.01E-25 |
| Spint1     | 62  | 6.817482204 | 3.491823513 | -3.32565869  | 3.45E-26 | 5.15E-25 |
| Paqr6      | 10  | 66.8059701  | 55.89783913 | -10.90813097 | 3.58E-26 | 5.34E-25 |
| Slc6a5     | 27  | 37.35751331 | 46.30104421 | 8.943530901  | 3.64E-26 | 5.44E-25 |
| Cd300a     | 6   | 52.35350875 | 34.771441   | -17.58206775 | 3.66E-26 | 5.46E-25 |
| Map7       | 168 | 5.682479585 | 3.628031284 | -2.054448301 | 3.76E-26 | 5.59E-25 |
| Galr2      | 7   | 28.14996932 | 47.36428856 | 19.21431924  | 4.14E-26 | 6.17E-25 |
| Mamstr     | 13  | 72.54716463 | 53.98488031 | -18.56228432 | 5.58E-26 | 8.30E-25 |
| Dyx1c1     | 22  | 7.681421307 | 2.278434147 | -5.402987159 | 6.15E-26 | 9.13E-25 |
| Adgrg1     | 9   | 23.33179344 | 9.778132306 | -13.55366113 | 6.26E-26 | 9.28E-25 |
| Olf522     | 4   | 75.51861489 | 49.79832953 | -25.72028536 | 6.41E-26 | 9.50E-25 |
| Arhgap25   | 5   | 63.7562724  | 31.23275691 | -32.52351549 | 6.71E-26 | 9.94E-25 |
| Kcp        | 30  | 7.272289779 | 3.548446448 | -3.723843331 | 7.10E-26 | 1.05E-24 |
| Tfap2c     | 94  | 45.60075916 | 51.95181716 | 6.351057998  | 7.26E-26 | 1.07E-24 |
| Acss1      | 37  | 7.166837698 | 12.21407254 | 5.047234842  | 7.42E-26 | 1.10E-24 |
| Topaz1     | 10  | 94.51935046 | 80.38167357 | -14.13767689 | 7.56E-26 | 1.12E-24 |
| Gm5712     | 3   | 81.64736763 | 54.17348751 | -27.47388012 | 7.60E-26 | 1.12E-24 |
| Cadps      | 41  | 5.354390634 | 2.438685607 | -2.915705027 | 7.73E-26 | 1.14E-24 |
| Ikzf3      | 45  | 31.27065368 | 40.12170313 | 8.85104945   | 8.23E-26 | 1.21E-24 |
| Grm8       | 33  | 26.11939424 | 33.70714636 | 7.587752118  | 8.41E-26 | 1.24E-24 |
| H2-Q2      | 21  | 13.98477222 | 10.21397805 | -3.770794175 | 9.73E-26 | 1.43E-24 |
| Synpo2l    | 6   | 91.76308126 | 77.47631362 | -14.28676764 | 9.83E-26 | 1.44E-24 |
| Hpn        | 33  | 51.53402719 | 44.56604261 | -6.967984579 | 9.82E-26 | 1.44E-24 |
| Olf284     | 7   | 91.78605337 | 74.20501524 | -17.58103813 | 9.86E-26 | 1.44E-24 |
| Svip       | 33  | 6.053624848 | 3.453292013 | -2.600332834 | 1.03E-25 | 1.50E-24 |
| Mfsd6l     | 30  | 39.07483259 | 30.57111092 | -8.503721671 | 1.05E-25 | 1.54E-24 |
| Eif5a2     | 67  | 5.940517166 | 3.069033424 | -2.871483742 | 1.05E-25 | 1.54E-24 |
| Adap2      | 17  | 10.54924919 | 19.17992292 | 8.630673737  | 1.06E-25 | 1.55E-24 |
| Pde8a      | 127 | 49.10448027 | 53.72926146 | 4.624781181  | 1.08E-25 | 1.58E-24 |
| '00012B09F | 12  | 55.09013039 | 38.09137369 | -16.9987567  | 1.12E-25 | 1.63E-24 |
| Calb2      | 26  | 55.05200674 | 62.63740876 | 7.585402014  | 1.16E-25 | 1.69E-24 |
| Cnksr2     | 133 | 19.40037888 | 15.21417909 | -4.186199788 | 1.19E-25 | 1.73E-24 |
| 30020B18F  | 58  | 3.880054543 | 1.919764381 | -1.960290162 | 1.21E-25 | 1.75E-24 |
| Dnah9      | 32  | 22.24762696 | 14.49540227 | -7.752224684 | 1.21E-25 | 1.76E-24 |

|            |     |             |             |              |          |          |
|------------|-----|-------------|-------------|--------------|----------|----------|
| Dscaml1    | 32  | 7.414395964 | 13.05735206 | 5.642956099  | 1.24E-25 | 1.79E-24 |
| 33422C13F  | 23  | 14.50587699 | 8.656075323 | -5.849801663 | 1.37E-25 | 1.98E-24 |
| Umodl1     | 3   | 91.76315413 | 65.51616852 | -26.24698561 | 1.52E-25 | 2.19E-24 |
| Them7      | 17  | 28.78496873 | 19.33488392 | -9.450084812 | 1.59E-25 | 2.29E-24 |
| Adora1     | 21  | 7.528289886 | 3.379607729 | -4.148682158 | 1.62E-25 | 2.34E-24 |
| Gdf15      | 22  | 37.5580247  | 30.24880477 | -7.309219929 | 1.71E-25 | 2.46E-24 |
| Ccdc184    | 22  | 18.05600191 | 13.33394827 | -4.722053636 | 1.76E-25 | 2.53E-24 |
| Pygo1      | 108 | 10.38172742 | 7.931785612 | -2.44994181  | 1.77E-25 | 2.54E-24 |
| 500029I14R | 3   | 58.20896574 | 81.59515952 | 23.38619378  | 1.85E-25 | 2.65E-24 |
| Gnal       | 96  | 8.366905101 | 12.33981181 | 3.972906707  | 1.87E-25 | 2.68E-24 |
| 30423F21F  | 19  | 5.129075411 | 1.60078252  | -3.528292891 | 1.99E-25 | 2.85E-24 |
| Cyp2w1     | 9   | 79.54277672 | 65.31227063 | -14.23050609 | 2.00E-25 | 2.86E-24 |
| Tacc2      | 28  | 51.39370483 | 60.15572026 | 8.762015431  | 2.04E-25 | 2.91E-24 |
| Def6       | 15  | 14.83631107 | 7.971694505 | -6.864616562 | 2.45E-25 | 3.51E-24 |
| Raet1a     | 18  | 7.893948623 | 3.787964741 | -4.105983881 | 2.71E-25 | 3.87E-24 |
| Meis1      | 46  | 15.85133147 | 11.94251583 | -3.90881564  | 3.05E-25 | 4.34E-24 |
| C1qtnf4    | 29  | 15.06831564 | 12.08118686 | -2.987128787 | 3.05E-25 | 4.35E-24 |
| Fign       | 92  | 3.369052557 | 1.721590162 | -1.647462395 | 3.29E-25 | 4.68E-24 |
| 00005J15R  | 18  | 19.56878305 | 11.34996494 | -8.218818118 | 3.66E-25 | 5.20E-24 |
| Sox12      | 128 | 3.892239968 | 6.877594278 | 2.985354309  | 3.83E-25 | 5.44E-24 |
| Ppm1e      | 72  | 3.578766808 | 1.702776773 | -1.875990035 | 3.91E-25 | 5.55E-24 |
| 00015E13F  | 5   | 91.35574274 | 63.45966034 | -27.8960824  | 4.19E-25 | 5.94E-24 |
| 32428N05F  | 22  | 23.67853178 | 32.73757549 | 9.059043717  | 4.28E-25 | 6.06E-24 |
| Rundc3b    | 42  | 12.30480583 | 8.158451897 | -4.146353936 | 4.29E-25 | 6.08E-24 |
| Gm5144     | 17  | 5.906861502 | 11.61045966 | 5.703598159  | 4.65E-25 | 6.57E-24 |
| Dmkn       | 5   | 70.42903107 | 44.65462468 | -25.77440639 | 4.67E-25 | 6.59E-24 |
| Siah3      | 7   | 19.7827125  | 43.33877624 | 23.55606374  | 5.28E-25 | 7.45E-24 |
| Arhgef10l  | 51  | 14.06665917 | 9.289956445 | -4.776702724 | 5.45E-25 | 7.69E-24 |
| Actl6b     | 28  | 14.22095542 | 22.73255614 | 8.511600712  | 5.77E-25 | 8.12E-24 |
| Sppl2c     | 9   | 78.11767181 | 65.73245249 | -12.38521932 | 6.29E-25 | 8.85E-24 |
| Wdr72      | 7   | 41.13914552 | 21.61495247 | -19.52419305 | 6.69E-25 | 9.41E-24 |
| Kif19a     | 26  | 12.651656   | 19.54527687 | 6.893620869  | 7.24E-25 | 1.02E-23 |
| Rnf150     | 19  | 5.121239026 | 1.941746444 | -3.179492583 | 7.34E-25 | 1.03E-23 |
| Pap0lb     | 55  | 78.76592414 | 73.29040364 | -5.4755205   | 7.53E-25 | 1.06E-23 |

|            |     |             |             |              |          |          |
|------------|-----|-------------|-------------|--------------|----------|----------|
| Zfp365     | 53  | 11.15669994 | 7.63513099  | -3.521568953 | 7.55E-25 | 1.06E-23 |
| Gm9895     | 6   | 32.78487888 | 56.24636455 | 23.46148566  | 7.69E-25 | 1.08E-23 |
| OC10086161 | 7   | 37.32253785 | 23.89258106 | -13.42995679 | 8.12E-25 | 1.13E-23 |
| Gpm6b      | 30  | 24.75076279 | 15.38966859 | -9.361094207 | 8.21E-25 | 1.15E-23 |
| Ska1       | 9   | 7.342929126 | 2.155811042 | -5.187118084 | 8.27E-25 | 1.15E-23 |
| Nell2      | 100 | 61.41715467 | 64.97727813 | 3.560123452  | 9.07E-25 | 1.26E-23 |
| Mical1     | 31  | 20.13240053 | 15.5198647  | -4.612535831 | 9.67E-25 | 1.35E-23 |
| Stk32b     | 20  | 34.30893216 | 25.58327876 | -8.725653393 | 9.83E-25 | 1.37E-23 |
| Ascl4      | 42  | 3.843751935 | 1.76168302  | -2.082068915 | 1.19E-24 | 1.65E-23 |
| i10307P16F | 4   | 30.61968569 | 13.69276094 | -16.92692475 | 1.19E-24 | 1.65E-23 |
| 210019I11R | 25  | 30.23414403 | 22.62502837 | -7.609115664 | 1.34E-24 | 1.86E-23 |
| Chst1      | 48  | 5.311752894 | 2.552884266 | -2.758868628 | 1.34E-24 | 1.86E-23 |
| Lhx1os     | 30  | 45.68804494 | 55.85772832 | 10.16968338  | 1.41E-24 | 1.95E-23 |
| l30019H16F | 11  | 45.61723945 | 33.6958724  | -11.92136705 | 1.41E-24 | 1.95E-23 |
| Prr7       | 72  | 4.488630409 | 2.49904305  | -1.989587359 | 1.52E-24 | 2.10E-23 |
| Tnfsfm13   | 19  | 5.904714145 | 2.016376323 | -3.888337823 | 1.58E-24 | 2.18E-23 |
| Tnfsf12    | 19  | 5.904714145 | 2.016376323 | -3.888337823 | 1.58E-24 | 2.18E-23 |
| Rspo4      | 46  | 17.5931637  | 14.60403924 | -2.989124458 | 1.73E-24 | 2.39E-23 |
| Adamtsl3   | 51  | 42.43405254 | 35.7239049  | -6.710147642 | 2.02E-24 | 2.78E-23 |
| Rwdd2a     | 18  | 16.9930937  | 7.062786466 | -9.930307238 | 2.07E-24 | 2.85E-23 |
| Atp2c2     | 18  | 60.15208439 | 69.8796068  | 9.727522411  | 2.22E-24 | 3.05E-23 |
| Cpq        | 15  | 9.090232319 | 3.660400231 | -5.429832088 | 2.70E-24 | 3.71E-23 |
| Antxr1     | 36  | 3.660500862 | 1.867505747 | -1.792995115 | 3.06E-24 | 4.19E-23 |
| Wnt5b      | 121 | 8.855742004 | 10.87923781 | 2.02349581   | 3.11E-24 | 4.26E-23 |
| Hoxa11     | 40  | 38.50247369 | 35.23025337 | -3.272220317 | 3.51E-24 | 4.81E-23 |
| Ptchd2     | 19  | 50.77402114 | 39.61453638 | -11.15948476 | 3.92E-24 | 5.36E-23 |
| Zswim5     | 146 | 3.654720042 | 2.40195292  | -1.252767122 | 5.21E-24 | 7.12E-23 |
| i30058N18F | 36  | 46.22753886 | 53.41029755 | 7.182758683  | 5.48E-24 | 7.48E-23 |
| Pcdhac2    | 32  | 49.92027173 | 58.79099071 | 8.870718981  | 5.80E-24 | 7.92E-23 |
| Ret        | 15  | 4.721635795 | 1.568079502 | -3.153556292 | 6.12E-24 | 8.33E-23 |
| Egr3       | 28  | 17.25286427 | 12.31974564 | -4.93311863  | 6.49E-24 | 8.84E-23 |
| Efs        | 43  | 11.42064707 | 9.128529852 | -2.292117222 | 6.74E-24 | 9.16E-23 |
| Elovl2     | 85  | 36.95640425 | 42.25775904 | 5.301354789  | 7.28E-24 | 9.89E-23 |
| Foxp2      | 34  | 14.76826368 | 10.16950318 | -4.598760497 | 7.72E-24 | 1.05E-22 |



|            |     |             |             |              |          |          |
|------------|-----|-------------|-------------|--------------|----------|----------|
| Ggt7       | 26  | 8.23256881  | 15.94009721 | 7.707528405  | 8.01E-24 | 1.09E-22 |
| Atp2b3     | 22  | 26.73031654 | 18.21734566 | -8.51297088  | 8.28E-24 | 1.12E-22 |
| Crb2       | 22  | 48.49279829 | 57.27750739 | 8.784709103  | 8.42E-24 | 1.14E-22 |
| Gm19557    | 9   | 86.72277484 | 72.48087863 | -14.24189621 | 8.73E-24 | 1.18E-22 |
| Pax1       | 14  | 32.6790894  | 47.29921033 | 14.62012093  | 8.77E-24 | 1.19E-22 |
| Il12rb2    | 10  | 20.20178831 | 12.42824287 | -7.773545437 | 9.00E-24 | 1.22E-22 |
| 130417C22F | 11  | 12.2244469  | 24.31196141 | 12.08751451  | 9.14E-24 | 1.23E-22 |
| Gm9767     | 71  | 14.18554268 | 12.50438176 | -1.68116092  | 9.57E-24 | 1.29E-22 |
| Gem        | 20  | 5.948522566 | 1.495985686 | -4.45253688  | 9.73E-24 | 1.31E-22 |
| Inhbe      | 5   | 76.37726824 | 59.33914103 | -17.03812721 | 9.90E-24 | 1.33E-22 |
| Aldh111    | 15  | 53.61389993 | 38.05860118 | -15.55529875 | 1.05E-23 | 1.41E-22 |
| Zfp2       | 19  | 7.477744104 | 3.173368963 | -4.304375141 | 1.05E-23 | 1.41E-22 |
| Fstl3      | 34  | 6.125633885 | 2.911633302 | -3.214000583 | 1.07E-23 | 1.44E-22 |
| Hs3st4     | 123 | 56.50489334 | 60.22790028 | 3.723006935  | 1.37E-23 | 1.84E-22 |
| Myo18a     | 11  | 52.83008616 | 43.62233882 | -9.207747342 | 1.47E-23 | 1.96E-22 |
| Speer2     | 2   | 78.125      | 40.61085973 | -37.51414027 | 1.48E-23 | 1.97E-22 |
| Cybrd1     | 41  | 8.585831454 | 5.531656389 | -3.054175065 | 1.97E-23 | 2.63E-22 |
| Serpinb9c  | 5   | 70.81639541 | 52.50256021 | -18.3138352  | 2.00E-23 | 2.67E-22 |
| Sncg       | 8   | 44.36590913 | 30.87107262 | -13.49483651 | 2.00E-23 | 2.67E-22 |
| Itga11     | 4   | 22.30207919 | 6.548081548 | -15.75399764 | 2.10E-23 | 2.80E-22 |
| Fgd1       | 49  | 23.74233438 | 16.98820532 | -6.754129061 | 2.17E-23 | 2.88E-22 |
| Znrf1      | 100 | 4.985072763 | 2.760848934 | -2.224223829 | 2.28E-23 | 3.03E-22 |
| Haus7      | 2   | 67.54844961 | 29.08653846 | -38.46191115 | 2.29E-23 | 3.05E-22 |
| F7         | 6   | 58.27423614 | 43.04779582 | -15.22644032 | 2.55E-23 | 3.39E-22 |
| Adam12     | 44  | 4.2829388   | 1.87452942  | -2.408409379 | 2.89E-23 | 3.83E-22 |
| Cox6a2     | 6   | 80.71207528 | 66.11017417 | -14.60190111 | 2.89E-23 | 3.83E-22 |
| Slc6a1     | 27  | 32.99461816 | 41.36297386 | 8.368355695  | 2.90E-23 | 3.84E-22 |
| Mir196a-2  | 16  | 20.94858505 | 10.49546911 | -10.45311594 | 2.95E-23 | 3.91E-22 |
| Elavl3     | 54  | 21.57046268 | 26.48781397 | 4.91735129   | 2.99E-23 | 3.95E-22 |
| Pou4f2     | 72  | 25.36368277 | 30.60044758 | 5.236764809  | 3.10E-23 | 4.09E-22 |
| Arx        | 15  | 53.77900097 | 67.89877494 | 14.11977396  | 3.26E-23 | 4.30E-22 |
| Lrrc10b    | 53  | 3.700927792 | 1.832243671 | -1.868684121 | 3.29E-23 | 4.34E-22 |
| Sfrp2      | 59  | 22.38412398 | 19.97396604 | -2.410157941 | 3.57E-23 | 4.70E-22 |
| Atp1b2     | 6   | 11.13184791 | 2.656977772 | -8.474870134 | 3.66E-23 | 4.82E-22 |

|            |     |             |             |              |          |          |
|------------|-----|-------------|-------------|--------------|----------|----------|
| Trp53i11   | 61  | 15.32029449 | 12.83213286 | -2.488161632 | 3.85E-23 | 5.06E-22 |
| !10039B01F | 10  | 51.4120288  | 37.62252098 | -13.78950782 | 4.51E-23 | 5.93E-22 |
| Sgcd       | 3   | 32.00784078 | 7.938285828 | -24.06955495 | 4.64E-23 | 6.09E-22 |
| Dtx1       | 46  | 34.6592098  | 42.11044481 | 7.451235011  | 4.97E-23 | 6.52E-22 |
| Fgf22      | 19  | 27.14254864 | 35.09408256 | 7.951533919  | 5.10E-23 | 6.68E-22 |
| Mir3962    | 11  | 61.68479049 | 49.18958865 | -12.49520184 | 5.49E-23 | 7.19E-22 |
| Mir6954    | 3   | 91.03420201 | 64.56010396 | -26.47409806 | 5.51E-23 | 7.20E-22 |
| Rimklb     | 97  | 31.78193421 | 35.78950335 | 4.007569141  | 5.65E-23 | 7.38E-22 |
| Bdh1       | 39  | 6.738114182 | 11.48873137 | 4.750617183  | 5.72E-23 | 7.47E-22 |
| !30077H06F | 58  | 45.34354982 | 50.63121391 | 5.287664083  | 5.85E-23 | 7.63E-22 |
| Mpped1     | 168 | 57.29281771 | 53.96398545 | -3.328832266 | 6.33E-23 | 8.25E-22 |
| Rhcg       | 12  | 19.95935326 | 27.88415081 | 7.924797547  | 6.54E-23 | 8.52E-22 |
| Arid3c     | 35  | 5.591851096 | 2.529261588 | -3.062589508 | 7.33E-23 | 9.54E-22 |
| Taf9b      | 43  | 21.08662992 | 15.11090884 | -5.975721086 | 7.87E-23 | 1.02E-21 |
| Eomes      | 15  | 10.90136838 | 5.218992466 | -5.682375918 | 9.31E-23 | 1.21E-21 |
| !30050P20F | 27  | 16.45203953 | 12.58138939 | -3.870650132 | 1.02E-22 | 1.32E-21 |
| Aim1l      | 5   | 82.98925536 | 67.22706866 | -15.7621867  | 1.03E-22 | 1.34E-21 |
| Adcyap1r1  | 24  | 23.85521035 | 19.90668477 | -3.94852558  | 1.05E-22 | 1.35E-21 |
| Zfp583     | 14  | 46.29766974 | 58.38892245 | 12.09125271  | 1.30E-22 | 1.68E-21 |
| Foxi1      | 7   | 88.74121203 | 75.43261801 | -13.30859401 | 1.41E-22 | 1.82E-21 |
| Ankrd63    | 33  | 7.306451897 | 4.082831265 | -3.223620632 | 1.41E-22 | 1.82E-21 |
| Kcnip4     | 8   | 23.50848322 | 11.11965276 | -12.38883046 | 1.66E-22 | 2.14E-21 |
| Vgll3      | 67  | 16.8151459  | 14.15393065 | -2.661215254 | 1.67E-22 | 2.15E-21 |
| Lppr3      | 42  | 3.219422461 | 6.217962738 | 2.998540277  | 1.71E-22 | 2.21E-21 |
| Zcchc12    | 5   | 53.21548822 | 29.08747173 | -24.12801648 | 1.89E-22 | 2.43E-21 |
| Isl2       | 19  | 10.0796983  | 16.36390378 | 6.284205477  | 1.90E-22 | 2.45E-21 |
| !30403H02F | 3   | 66.45651511 | 44.47256452 | -21.98395059 | 1.91E-22 | 2.45E-21 |
| Acp5       | 25  | 32.36563835 | 25.81391468 | -6.551723668 | 1.96E-22 | 2.51E-21 |
| Wnt9a      | 83  | 2.414300131 | 0.849102954 | -1.565197176 | 2.17E-22 | 2.79E-21 |
| Dmrta2     | 66  | 36.71128536 | 31.90338504 | -4.807900327 | 2.18E-22 | 2.80E-21 |
| Dnmt3b     | 73  | 2.216057647 | 0.967662123 | -1.248395524 | 2.22E-22 | 2.84E-21 |
| Prss50     | 8   | 37.78690613 | 26.50377647 | -11.28312966 | 2.42E-22 | 3.10E-21 |
| Lrrc26     | 18  | 5.781772896 | 1.828178489 | -3.953594407 | 3.15E-22 | 4.03E-21 |
| Gprc5c     | 74  | 4.241999118 | 2.261933853 | -1.980065265 | 3.29E-22 | 4.20E-21 |

|          |     |             |             |              |          |          |
|----------|-----|-------------|-------------|--------------|----------|----------|
| Mmd2     | 16  | 12.44281771 | 21.16984772 | 8.727030011  | 3.36E-22 | 4.29E-21 |
| Reck     | 84  | 4.469635256 | 2.804344979 | -1.665290277 | 3.42E-22 | 4.35E-21 |
| Slc37a1  | 65  | 4.238330886 | 1.893807928 | -2.344522958 | 3.54E-22 | 4.51E-21 |
| Chga     | 26  | 32.4437768  | 39.44120657 | 6.99742977   | 3.58E-22 | 4.56E-21 |
| C77370   | 75  | 31.42047027 | 26.53242613 | -4.888044135 | 3.60E-22 | 4.58E-21 |
| Mir9-3   | 69  | 43.84048634 | 49.35057684 | 5.510090503  | 4.16E-22 | 5.29E-21 |
| Tmem221  | 50  | 11.45926963 | 8.21112582  | -3.248143807 | 4.47E-22 | 5.68E-21 |
| Gsc2     | 51  | 22.84770864 | 18.02514562 | -4.822563024 | 4.58E-22 | 5.81E-21 |
| Hoxc13   | 58  | 30.13216739 | 26.1430557  | -3.989111695 | 4.71E-22 | 5.97E-21 |
| Tll1     | 71  | 10.21272853 | 7.868439356 | -2.344289171 | 4.83E-22 | 6.12E-21 |
| Fut9     | 28  | 43.01172337 | 35.51375649 | -7.497966881 | 4.92E-22 | 6.22E-21 |
| Gpr153   | 87  | 6.158947289 | 4.702895735 | -1.456051554 | 6.15E-22 | 7.78E-21 |
| Lhfp     | 33  | 7.121968894 | 3.149378203 | -3.972590691 | 7.19E-22 | 9.07E-21 |
| Vma21    | 16  | 27.312943   | 15.01529923 | -12.29764377 | 7.72E-22 | 9.74E-21 |
| Gm17359  | 8   | 71.18458753 | 53.51946475 | -17.66512278 | 8.73E-22 | 1.10E-20 |
| Bglap3   | 5   | 80.19309908 | 63.9385842  | -16.25451488 | 8.90E-22 | 1.12E-20 |
| Adam19   | 26  | 17.15072512 | 23.2031784  | 6.052453285  | 9.12E-22 | 1.15E-20 |
| Sst      | 9   | 13.72356956 | 6.14759354  | -7.575976021 | 9.33E-22 | 1.17E-20 |
| Gm38402  | 3   | 81.655585   | 60.38643385 | -21.26915115 | 9.36E-22 | 1.18E-20 |
| Phf24    | 86  | 8.728319913 | 7.975944627 | -0.752375285 | 9.45E-22 | 1.19E-20 |
| Chst7    | 53  | 27.80325101 | 23.08574008 | -4.717510927 | 9.55E-22 | 1.20E-20 |
| Tanc2    | 96  | 5.049135816 | 3.861561954 | -1.187573863 | 1.22E-21 | 1.53E-20 |
| Pantr1   | 14  | 46.4295811  | 62.94042822 | 16.51084712  | 1.23E-21 | 1.54E-20 |
| Ppp1r14c | 13  | 28.36317353 | 13.92975461 | -14.43341892 | 1.29E-21 | 1.61E-20 |
| Zfp105   | 24  | 39.86463309 | 34.07894374 | -5.785689354 | 1.30E-21 | 1.63E-20 |
| Mir6396  | 5   | 89.22945285 | 73.66769277 | -15.56176008 | 1.31E-21 | 1.63E-20 |
| Chrna6   | 4   | 48.49204259 | 29.57071868 | -18.92132391 | 1.31E-21 | 1.63E-20 |
| Cd22     | 2   | 83.71021399 | 56.34001637 | -27.37019762 | 1.31E-21 | 1.64E-20 |
| Frmd7    | 5   | 73.17279025 | 55.68909681 | -17.48369344 | 1.33E-21 | 1.66E-20 |
| Skor1    | 107 | 11.45247051 | 10.51495019 | -0.937520322 | 1.39E-21 | 1.73E-20 |
| Fgfr1    | 54  | 10.02861889 | 14.83221396 | 4.803595071  | 1.40E-21 | 1.74E-20 |
| Scube1   | 93  | 21.42892313 | 25.15948467 | 3.730561539  | 1.43E-21 | 1.78E-20 |
| Kcnk1    | 29  | 7.06137825  | 4.286087323 | -2.775290927 | 1.43E-21 | 1.78E-20 |
| Nfam1    | 10  | 51.31958035 | 39.81065496 | -11.50892539 | 1.55E-21 | 1.92E-20 |

|           |     |             |             |              |          |          |
|-----------|-----|-------------|-------------|--------------|----------|----------|
| Insm1     | 126 | 8.269286718 | 5.595971491 | -2.673315227 | 1.60E-21 | 1.98E-20 |
| Cacna1d   | 136 | 20.27114238 | 18.79438008 | -1.4767623   | 1.70E-21 | 2.10E-20 |
| Hhip1     | 52  | 5.836587695 | 3.717853457 | -2.118734238 | 1.76E-21 | 2.18E-20 |
| Tmcc2     | 66  | 2.374481966 | 1.256083277 | -1.118398688 | 1.96E-21 | 2.42E-20 |
| Synpo     | 38  | 7.512191656 | 3.4495782   | -4.062613456 | 2.30E-21 | 2.84E-20 |
| Epha5     | 31  | 21.49109032 | 17.06459539 | -4.426494928 | 2.34E-21 | 2.89E-20 |
| Shc2      | 94  | 3.057280149 | 1.669853484 | -1.387426665 | 2.49E-21 | 3.07E-20 |
| Hhla1     | 3   | 59.04104763 | 34.55800748 | -24.48304015 | 2.69E-21 | 3.31E-20 |
| Bdkrb2    | 12  | 13.12820713 | 4.748605146 | -8.379601979 | 2.75E-21 | 3.39E-20 |
| 30112J18R | 5   | 50.44054825 | 29.74034815 | -20.7002001  | 3.02E-21 | 3.71E-20 |
| Gm14139   | 5   | 83.74069638 | 67.65269306 | -16.08800332 | 3.11E-21 | 3.83E-20 |
| Bcl2l10   | 17  | 94.85346155 | 87.97004916 | -6.883412389 | 3.50E-21 | 4.30E-20 |
| Cds1      | 119 | 3.354164399 | 2.384367589 | -0.96979681  | 3.75E-21 | 4.60E-20 |
| Tab3      | 68  | 25.15788405 | 19.99739268 | -5.160491364 | 3.84E-21 | 4.70E-20 |
| Gabra5    | 84  | 54.63034831 | 58.54388197 | 3.91353366   | 4.06E-21 | 4.97E-20 |
| Hopx      | 66  | 14.13677452 | 13.30366943 | -0.833105081 | 4.09E-21 | 5.00E-20 |
| Gng7      | 7   | 86.46880005 | 70.42481981 | -16.04398024 | 4.28E-21 | 5.24E-20 |
| Coro2b    | 59  | 6.862532007 | 10.21114313 | 3.348611119  | 4.30E-21 | 5.25E-20 |
| Gstm4     | 17  | 6.445926532 | 2.282645922 | -4.16328061  | 4.72E-21 | 5.76E-20 |
| Fancd2os  | 12  | 72.67410517 | 79.48817745 | 6.814072273  | 5.18E-21 | 6.32E-20 |
| Slc22a3   | 33  | 30.40530288 | 25.95678528 | -4.448517607 | 5.74E-21 | 7.00E-20 |
| Trim58    | 18  | 31.73069609 | 22.64951859 | -9.081177494 | 5.80E-21 | 7.06E-20 |
| Lrrc9     | 5   | 29.97490321 | 16.9288196  | -13.04608361 | 6.50E-21 | 7.90E-20 |
| Bcl11b    | 69  | 9.762975468 | 12.90291484 | 3.139939367  | 6.78E-21 | 8.24E-20 |
| Gm16596   | 58  | 2.101810468 | 1.032493192 | -1.069317276 | 7.33E-21 | 8.90E-20 |
| Lhfpl5    | 25  | 11.11812806 | 17.2255308  | 6.107402741  | 7.42E-21 | 9.00E-20 |
| Ammecr1   | 77  | 21.22995501 | 16.24487692 | -4.985078089 | 7.62E-21 | 9.24E-20 |
| Creg2     | 35  | 11.10375185 | 16.35311289 | 5.249361037  | 7.64E-21 | 9.25E-20 |
| Gprin3    | 8   | 10.40139072 | 5.245993593 | -5.15539713  | 7.64E-21 | 9.25E-20 |
| Foxg1     | 41  | 4.242156193 | 2.154826694 | -2.087329499 | 8.49E-21 | 1.03E-19 |
| B3gnt3    | 14  | 11.68950331 | 6.055669874 | -5.633833434 | 8.93E-21 | 1.08E-19 |
| Auts2     | 31  | 54.37283843 | 62.63343764 | 8.260599207  | 8.98E-21 | 1.08E-19 |
| Zfp819    | 21  | 12.13215217 | 7.165795486 | -4.966356687 | 1.08E-20 | 1.31E-19 |
| Hcar1     | 9   | 46.26897193 | 33.93219526 | -12.33677667 | 1.14E-20 | 1.37E-19 |

|            |    |             |             |              |          |          |
|------------|----|-------------|-------------|--------------|----------|----------|
| 310429I04R | 13 | 20.07740194 | 12.01310056 | -8.064301374 | 1.18E-20 | 1.42E-19 |
| Cand2      | 15 | 21.34170722 | 16.4549455  | -4.886761722 | 1.20E-20 | 1.44E-19 |
| Tmem164    | 66 | 15.24045862 | 10.89656839 | -4.343890229 | 1.25E-20 | 1.50E-19 |
| Mmrn2      | 9  | 49.21897237 | 37.36544104 | -11.85353133 | 1.29E-20 | 1.55E-19 |
| Rasl2-9    | 35 | 38.60087757 | 31.95323537 | -6.647642199 | 1.32E-20 | 1.58E-19 |
| Akap5      | 42 | 28.8906149  | 34.32418536 | 5.433570462  | 1.43E-20 | 1.71E-19 |
| Slc16a12   | 41 | 15.33335697 | 11.51791739 | -3.815439576 | 1.50E-20 | 1.80E-19 |
| Ppp1r16b   | 34 | 17.09456846 | 13.6518028  | -3.442765664 | 1.60E-20 | 1.92E-19 |
| Kcna2      | 76 | 23.31974081 | 27.19533464 | 3.87559383   | 1.69E-20 | 2.03E-19 |
| Gyltl1b    | 31 | 7.132665492 | 11.25310085 | 4.120435353  | 1.70E-20 | 2.04E-19 |
| Prickle3   | 22 | 29.42072836 | 19.47698594 | -9.943742427 | 1.77E-20 | 2.12E-19 |
| Ppp1r3f    | 43 | 21.19069603 | 14.76208194 | -6.428614089 | 1.93E-20 | 2.30E-19 |
| Mum1l1     | 10 | 31.14244374 | 15.59483934 | -15.5476044  | 2.04E-20 | 2.43E-19 |
| Mir6392    | 40 | 6.392464764 | 2.93009729  | -3.462367473 | 2.04E-20 | 2.43E-19 |
| Kcnt1      | 46 | 17.73142074 | 13.5680011  | -4.163419644 | 2.09E-20 | 2.49E-19 |
| Padi1      | 5  | 52.31481481 | 24.97915162 | -27.33566319 | 2.09E-20 | 2.49E-19 |
| 30021M05f  | 23 | 36.82660918 | 45.33605318 | 8.509443995  | 2.10E-20 | 2.49E-19 |
| Htr3b      | 4  | 39.64667688 | 22.1951795  | -17.45149738 | 2.10E-20 | 2.49E-19 |
| Gm7271     | 4  | 75.70332343 | 58.57278975 | -17.13053369 | 2.21E-20 | 2.62E-19 |
| Scnn1b     | 10 | 21.92606538 | 13.24462164 | -8.681443747 | 2.50E-20 | 2.96E-19 |
| Avpr1a     | 26 | 21.34555537 | 31.44177182 | 10.09621645  | 2.54E-20 | 3.01E-19 |
| !30079O03F | 6  | 86.47735899 | 74.36332135 | -12.11403763 | 2.58E-20 | 3.05E-19 |
| Vmn2r29    | 23 | 70.47568137 | 63.10457493 | -7.371106437 | 2.71E-20 | 3.21E-19 |
| Bst2       | 20 | 5.811733957 | 1.437971401 | -4.373762557 | 2.73E-20 | 3.22E-19 |
| Vstm2l     | 81 | 40.48811565 | 45.00206209 | 4.513946442  | 3.13E-20 | 3.70E-19 |
| Eif4e3     | 64 | 2.943590019 | 1.382938484 | -1.560651534 | 3.28E-20 | 3.88E-19 |
| Plbd1      | 28 | 20.26170643 | 14.60275544 | -5.658950989 | 3.34E-20 | 3.94E-19 |
| Mospd4     | 35 | 19.92807011 | 27.58278328 | 7.654713169  | 3.66E-20 | 4.32E-19 |
| Ms4a7      | 2  | 74.1300813  | 38.12947242 | -36.00060888 | 4.24E-20 | 4.99E-19 |
| Gm13752    | 4  | 79.64038945 | 55.9133763  | -23.72701315 | 4.34E-20 | 5.11E-19 |
| Tgfb2      | 18 | 11.35592964 | 6.410932277 | -4.944997365 | 4.80E-20 | 5.64E-19 |
| Gpr6       | 11 | 40.65963635 | 27.17214797 | -13.48748838 | 5.15E-20 | 6.05E-19 |
| '32456N10F | 5  | 94.02513818 | 83.02760865 | -10.99752954 | 5.20E-20 | 6.10E-19 |
| Mir5126    | 46 | 32.72195487 | 28.41945029 | -4.30250458  | 5.47E-20 | 6.42E-19 |

|            |     |             |             |              |          |          |
|------------|-----|-------------|-------------|--------------|----------|----------|
| Abca13     | 5   | 75.51381424 | 57.93869103 | -17.57512321 | 5.56E-20 | 6.51E-19 |
| BC051628   | 7   | 8.389795592 | 1.09966238  | -7.290133213 | 5.92E-20 | 6.94E-19 |
| Cdh22      | 100 | 6.539906464 | 5.781966261 | -0.757940203 | 6.74E-20 | 7.89E-19 |
| Necab2     | 93  | 16.38665064 | 19.65136006 | 3.264709419  | 6.79E-20 | 7.94E-19 |
| Cstad      | 17  | 26.99324638 | 21.63939671 | -5.353849667 | 7.27E-20 | 8.49E-19 |
| Mettl24    | 42  | 11.96003799 | 8.684923364 | -3.275114625 | 7.29E-20 | 8.51E-19 |
| 510035F20F | 57  | 4.068389573 | 2.156905935 | -1.911483639 | 8.89E-20 | 1.04E-18 |
| Spag16     | 24  | 61.41976169 | 68.59094816 | 7.171186464  | 8.91E-20 | 1.04E-18 |
| Tbx15      | 72  | 2.739017355 | 1.714812466 | -1.024204889 | 9.05E-20 | 1.05E-18 |
| Rps6       | 60  | 3.936748213 | 6.740896478 | 2.804148265  | 1.13E-19 | 1.31E-18 |
| Tbx1       | 70  | 27.22185208 | 24.17985279 | -3.04199929  | 1.30E-19 | 1.51E-18 |
| Kcnk12     | 77  | 32.20065731 | 37.54234145 | 5.341684148  | 1.33E-19 | 1.55E-18 |
| Podxl2     | 41  | 11.32697315 | 8.751809337 | -2.575163814 | 1.47E-19 | 1.71E-18 |
| Slc17a7    | 35  | 12.45254701 | 10.30105494 | -2.151492072 | 1.54E-19 | 1.78E-18 |
| Kcnmb1     | 9   | 55.04550854 | 38.44009815 | -16.60541039 | 1.57E-19 | 1.82E-18 |
| Dtna       | 52  | 13.32295282 | 17.15279557 | 3.829842744  | 1.63E-19 | 1.89E-18 |
| Nrcam      | 77  | 14.38809119 | 17.72300802 | 3.334916833  | 1.78E-19 | 2.06E-18 |
| Megf6      | 20  | 4.266807125 | 1.628491731 | -2.638315394 | 1.78E-19 | 2.06E-18 |
| 130533P14F | 6   | 87.6803301  | 68.1425383  | -19.5377918  | 1.85E-19 | 2.14E-18 |
| Cntnap1    | 15  | 15.13713354 | 5.576933071 | -9.560200468 | 1.88E-19 | 2.17E-18 |
| Dnah1      | 15  | 7.630591892 | 2.851944012 | -4.77864788  | 1.90E-19 | 2.19E-18 |
| Cgref1     | 19  | 14.23776359 | 9.477595069 | -4.760168519 | 1.94E-19 | 2.24E-18 |
| Syt7       | 97  | 2.075423185 | 1.292634072 | -0.782789113 | 1.97E-19 | 2.26E-18 |
| Timm8a2    | 4   | 97.63120393 | 86.7854746  | -10.84572932 | 2.17E-19 | 2.49E-18 |
| Cnbd2      | 89  | 3.325666877 | 1.608702558 | -1.716964319 | 2.17E-19 | 2.50E-18 |
| Sntg1      | 23  | 46.39232333 | 54.16444518 | 7.772121857  | 2.19E-19 | 2.51E-18 |
| Pou4f3     | 10  | 21.21956111 | 12.62441422 | -8.595146883 | 2.25E-19 | 2.58E-18 |
| Fam131c    | 40  | 3.592368845 | 1.772630045 | -1.819738799 | 2.27E-19 | 2.60E-18 |
| Gm3558     | 3   | 25.09121061 | 46.64464309 | 21.55343247  | 2.44E-19 | 2.80E-18 |
| Apba3      | 13  | 7.153065469 | 2.978268196 | -4.174797272 | 2.49E-19 | 2.85E-18 |
| Sdr16c5    | 4   | 72.7422322  | 54.94052614 | -17.80170606 | 2.55E-19 | 2.92E-18 |
| Robo1      | 30  | 29.59859547 | 24.36164014 | -5.236955333 | 2.56E-19 | 2.92E-18 |
| Gstp2      | 5   | 80.96345966 | 63.39720491 | -17.56625475 | 2.70E-19 | 3.08E-18 |
| Foxn4      | 48  | 16.65794753 | 21.7151685  | 5.057220977  | 2.87E-19 | 3.28E-18 |

|            |     |             |             |              |          |          |
|------------|-----|-------------|-------------|--------------|----------|----------|
| Tead2      | 25  | 7.354644488 | 3.705383696 | -3.649260793 | 2.88E-19 | 3.29E-18 |
| !00002D01F | 25  | 25.89031926 | 19.34596345 | -6.544355814 | 2.91E-19 | 3.32E-18 |
| Pnpla3     | 38  | 7.247959002 | 3.656097026 | -3.591861976 | 3.17E-19 | 3.61E-18 |
| Dmrtb1     | 25  | 88.00769103 | 82.55654119 | -5.451149838 | 3.32E-19 | 3.78E-18 |
| Fgf11      | 23  | 19.45430698 | 14.20299414 | -5.251312831 | 3.54E-19 | 4.03E-18 |
| Onecut1    | 37  | 15.83258272 | 11.66372646 | -4.168856255 | 3.71E-19 | 4.22E-18 |
| Gata2      | 51  | 11.16010265 | 7.084441937 | -4.075660717 | 3.79E-19 | 4.30E-18 |
| Adgra1     | 18  | 6.468869737 | 2.68004828  | -3.788821457 | 4.00E-19 | 4.54E-18 |
| Slc7a2     | 11  | 10.33241007 | 4.762268703 | -5.570141371 | 4.04E-19 | 4.58E-18 |
| Fli1       | 30  | 8.972896478 | 15.2067698  | 6.23387332   | 4.17E-19 | 4.73E-18 |
| Slc12a5    | 48  | 22.00848092 | 28.09604788 | 6.087566958  | 4.35E-19 | 4.92E-18 |
| Smagp      | 68  | 5.177305392 | 3.800166208 | -1.377139184 | 4.34E-19 | 4.92E-18 |
| Bik        | 50  | 26.89595405 | 31.55849679 | 4.662542738  | 4.84E-19 | 5.47E-18 |
| P4htm      | 39  | 8.469674107 | 5.571817899 | -2.897856208 | 5.21E-19 | 5.89E-18 |
| Mir7240    | 24  | 18.10073476 | 10.35876918 | -7.741965579 | 5.50E-19 | 6.20E-18 |
| Tuba3a     | 15  | 93.77073516 | 82.44868762 | -11.32204754 | 5.53E-19 | 6.23E-18 |
| Pnma2      | 80  | 36.42008039 | 33.29224699 | -3.127833406 | 5.57E-19 | 6.27E-18 |
| Plk5       | 68  | 10.7537281  | 8.649354774 | -2.104373328 | 6.21E-19 | 6.99E-18 |
| Cst6       | 12  | 5.631312636 | 1.011804799 | -4.619507837 | 6.46E-19 | 7.27E-18 |
| Rprl2      | 2   | 89.99603489 | 67.59836698 | -22.39766791 | 6.73E-19 | 7.57E-18 |
| Gna14      | 11  | 9.893360948 | 3.362744472 | -6.530616476 | 6.81E-19 | 7.66E-18 |
| Fam198b    | 4   | 28.23518755 | 14.40849373 | -13.82669383 | 7.14E-19 | 8.02E-18 |
| !30520O04F | 45  | 7.125188449 | 3.979545918 | -3.145642531 | 7.28E-19 | 8.17E-18 |
| Clcn5      | 41  | 18.3992848  | 13.05259077 | -5.34669403  | 7.34E-19 | 8.23E-18 |
| Gm960      | 13  | 4.770349913 | 0.91333577  | -3.857014143 | 7.40E-19 | 8.29E-18 |
| Shisa6     | 156 | 24.53194896 | 27.75340673 | 3.221457775  | 7.75E-19 | 8.67E-18 |
| !30158H04F | 14  | 42.87907986 | 35.82987157 | -7.049208287 | 7.80E-19 | 8.72E-18 |
| Cnih3      | 43  | 6.035133288 | 2.481429578 | -3.55370371  | 7.85E-19 | 8.76E-18 |
| Cyb5r2     | 11  | 11.71061928 | 5.368542158 | -6.342077124 | 7.85E-19 | 8.76E-18 |
| Slc43a3    | 16  | 38.0581557  | 32.01074779 | -6.047407906 | 7.97E-19 | 8.89E-18 |
| Abcg4      | 47  | 6.173353121 | 4.099299584 | -2.074053536 | 8.04E-19 | 8.96E-18 |
| Tcl1       | 4   | 91.08743077 | 72.49760399 | -18.58982678 | 8.19E-19 | 9.12E-18 |
| Palm2      | 25  | 13.38775857 | 19.18963731 | 5.801878745  | 8.23E-19 | 9.16E-18 |
| Pakap      | 25  | 13.38775857 | 19.18963731 | 5.801878745  | 8.23E-19 | 9.16E-18 |

|            |    |             |             |              |          |          |
|------------|----|-------------|-------------|--------------|----------|----------|
| Cd200r3    | 2  | 92.48177447 | 71.96947979 | -20.51229468 | 8.40E-19 | 9.34E-18 |
| Hcrtr1     | 46 | 9.371507404 | 14.2191918  | 4.847684396  | 8.49E-19 | 9.43E-18 |
| Asb10      | 2  | 91.59820031 | 43.22836662 | -48.3698337  | 8.63E-19 | 9.57E-18 |
| Lypd3      | 10 | 59.33496731 | 47.28519292 | -12.04977439 | 9.28E-19 | 1.03E-17 |
| Cthrc1     | 4  | 24.92869556 | 43.91921476 | 18.9905192   | 9.61E-19 | 1.06E-17 |
| Mir330     | 8  | 8.583029905 | 1.996338841 | -6.586691064 | 1.07E-18 | 1.19E-17 |
| AU022751   | 29 | 88.93555914 | 83.25808659 | -5.67747255  | 1.11E-18 | 1.23E-17 |
| Chst3      | 64 | 10.77136958 | 7.898807228 | -2.872562355 | 1.13E-18 | 1.25E-17 |
| Nbl1       | 99 | 10.68065576 | 8.367033779 | -2.313621984 | 1.15E-18 | 1.27E-17 |
| Mmp25      | 28 | 14.5569376  | 21.61927591 | 7.06233831   | 1.17E-18 | 1.29E-17 |
| Tnfrsf8    | 12 | 25.95598351 | 15.96968957 | -9.986293933 | 1.22E-18 | 1.35E-17 |
| Madcam1    | 12 | 66.55674953 | 54.7048384  | -11.85191113 | 1.25E-18 | 1.38E-17 |
| H1fnt      | 8  | 72.9764633  | 57.89587189 | -15.08059141 | 1.33E-18 | 1.46E-17 |
| Ptgis      | 33 | 23.3248839  | 29.40696533 | 6.082081423  | 1.60E-18 | 1.76E-17 |
| Armc12     | 6  | 81.72505315 | 66.41161758 | -15.31343557 | 1.69E-18 | 1.86E-17 |
| Ccdc3      | 35 | 5.84659226  | 3.56240527  | -2.28418699  | 1.73E-18 | 1.90E-17 |
| Suv39h1    | 89 | 19.84401913 | 15.21117328 | -4.632845851 | 1.79E-18 | 1.97E-17 |
| Lrfn2      | 6  | 22.80904691 | 13.77781478 | -9.031232135 | 1.82E-18 | 2.00E-17 |
| Prr15      | 5  | 25.86312568 | 12.91919393 | -12.94393175 | 1.91E-18 | 2.09E-17 |
| Kcnip3     | 40 | 20.63069046 | 16.73986516 | -3.890825304 | 1.97E-18 | 2.16E-17 |
| Mxra8      | 7  | 46.15339127 | 30.64012445 | -15.51326682 | 2.04E-18 | 2.24E-17 |
| Nrgn       | 6  | 3.851218157 | 20.27940463 | 16.42818647  | 2.08E-18 | 2.28E-17 |
| .30074G19F | 68 | 2.640635221 | 1.539767739 | -1.100867481 | 2.11E-18 | 2.30E-17 |
| Mpl        | 2  | 51.32985941 | 21.42071604 | -29.90914337 | 2.47E-18 | 2.70E-17 |
| Cntn2      | 23 | 23.11350498 | 15.53824626 | -7.575258715 | 2.53E-18 | 2.76E-17 |
| Slc2a10    | 6  | 22.33632402 | 13.01855538 | -9.317768639 | 2.64E-18 | 2.88E-17 |
| Sobp       | 87 | 4.824571708 | 3.105234987 | -1.719336721 | 2.91E-18 | 3.17E-17 |
| Fhl1       | 43 | 29.48599488 | 23.21735283 | -6.268642053 | 3.16E-18 | 3.44E-17 |
| Efnb3      | 47 | 54.22278712 | 59.40174688 | 5.178959765  | 3.18E-18 | 3.46E-17 |
| Arhgef18   | 22 | 26.29305993 | 19.98289163 | -6.310168299 | 3.50E-18 | 3.81E-17 |
| Krt4       | 6  | 93.4123801  | 79.08868302 | -14.32369709 | 3.52E-18 | 3.83E-17 |
| Stag2      | 74 | 24.53790761 | 18.98364179 | -5.554265822 | 3.55E-18 | 3.86E-17 |
| Dgkg       | 35 | 22.61139559 | 31.03255765 | 8.421162054  | 3.98E-18 | 4.32E-17 |
| Xkr5       | 7  | 4.963003254 | 13.91897695 | 8.955973696  | 4.14E-18 | 4.49E-17 |



|            |     |             |             |              |          |          |
|------------|-----|-------------|-------------|--------------|----------|----------|
| Lemd1      | 68  | 8.446764761 | 6.961486176 | -1.485278585 | 4.19E-18 | 4.54E-17 |
| Pex5l      | 116 | 61.2394059  | 64.02706962 | 2.78766372   | 4.27E-18 | 4.63E-17 |
| Tiam2      | 36  | 4.862616486 | 2.018461977 | -2.844154509 | 4.56E-18 | 4.93E-17 |
| 330451l11R | 7   | 27.0345668  | 14.31262127 | -12.72194553 | 4.89E-18 | 5.28E-17 |
| Fkbp6      | 14  | 90.23669473 | 78.90314579 | -11.33354894 | 5.01E-18 | 5.42E-17 |
| Cacng2     | 64  | 29.80092098 | 34.382833   | 4.581912017  | 5.16E-18 | 5.57E-17 |
| Thbs4      | 31  | 19.65933242 | 26.72426835 | 7.064935931  | 5.46E-18 | 5.89E-17 |
| Slc15a1    | 18  | 21.40311719 | 13.80567973 | -7.597437463 | 5.73E-18 | 6.18E-17 |
| Cdx1       | 69  | 69.80798691 | 74.20949638 | 4.40150947   | 5.90E-18 | 6.36E-17 |
| Lhfpl3     | 54  | 23.49656518 | 19.15640708 | -4.340158103 | 6.28E-18 | 6.76E-17 |
| Dyrk4      | 4   | 22.27038872 | 10.69715565 | -11.57323307 | 6.83E-18 | 7.35E-17 |
| Mir181d    | 3   | 93.12523911 | 78.00396908 | -15.12127003 | 7.21E-18 | 7.75E-17 |
| H60c       | 5   | 77.02990333 | 62.03424849 | -14.99565484 | 7.35E-18 | 7.89E-17 |
| BC051537   | 6   | 72.68645772 | 58.82906747 | -13.85739025 | 7.90E-18 | 8.48E-17 |
| Slit1      | 37  | 29.70951306 | 36.17567543 | 6.466162371  | 8.07E-18 | 8.66E-17 |
| Pnma1      | 54  | 46.46166111 | 51.90143102 | 5.439769913  | 8.18E-18 | 8.77E-17 |
| Tmem200c   | 30  | 44.04821956 | 54.65940815 | 10.61118858  | 8.84E-18 | 9.47E-17 |
| Ppp1r3d    | 60  | 55.20635471 | 60.14021557 | 4.933860859  | 9.65E-18 | 1.03E-16 |
| Ephx1      | 2   | 6.265011741 | 21.06227106 | 14.79725932  | 1.00E-17 | 1.07E-16 |
| Ehd3       | 30  | 32.67762351 | 38.82500985 | 6.147386342  | 1.01E-17 | 1.08E-16 |
| Gm684      | 28  | 13.83962144 | 8.464311326 | -5.375310112 | 1.09E-17 | 1.17E-16 |
| Wnt9b      | 42  | 14.81131307 | 12.0051799  | -2.806133165 | 1.11E-17 | 1.18E-16 |
| Tceal3     | 10  | 39.92462418 | 23.52717862 | -16.39744556 | 1.15E-17 | 1.22E-16 |
| Il3        | 5   | 80.19278976 | 64.47461036 | -15.7181794  | 1.15E-17 | 1.22E-16 |
| Krt85      | 11  | 92.52118863 | 80.39060304 | -12.13058559 | 1.18E-17 | 1.26E-16 |
| Mchr1      | 18  | 15.82272735 | 10.37196005 | -5.450767302 | 1.48E-17 | 1.58E-16 |
| Gpr45      | 31  | 15.54288847 | 9.923658147 | -5.619230324 | 1.51E-17 | 1.61E-16 |
| 330402F18F | 69  | 7.219869682 | 5.903190796 | -1.316678886 | 1.52E-17 | 1.62E-16 |
| Podn       | 67  | 9.603929017 | 7.812822525 | -1.791106492 | 1.54E-17 | 1.64E-16 |
| Inhbb      | 38  | 6.428962477 | 3.462072394 | -2.966890083 | 1.59E-17 | 1.68E-16 |
| Ikzf4      | 8   | 13.14028513 | 25.91160221 | 12.77131708  | 1.67E-17 | 1.77E-16 |
| Gm14812    | 7   | 70.59745279 | 51.05920997 | -19.53824283 | 1.81E-17 | 1.92E-16 |
| Pyroxd2    | 12  | 12.67857803 | 7.073922719 | -5.604655308 | 2.02E-17 | 2.14E-16 |
| Slc44a3    | 32  | 19.20213363 | 16.64547063 | -2.556663001 | 2.08E-17 | 2.20E-16 |

|            |     |             |             |              |          |          |
|------------|-----|-------------|-------------|--------------|----------|----------|
| Mir7086    | 3   | 66.34825328 | 48.48811752 | -17.86013576 | 2.33E-17 | 2.47E-16 |
| Gad2       | 2   | 17.95938929 | 1.275463146 | -16.68392614 | 2.55E-17 | 2.69E-16 |
| Kif1a      | 29  | 32.91794212 | 41.2508821  | 8.332939978  | 2.67E-17 | 2.82E-16 |
| Porcn      | 36  | 17.45049565 | 12.2543724  | -5.196123254 | 2.75E-17 | 2.90E-16 |
| Mgp        | 8   | 78.90366314 | 70.05602947 | -8.847633671 | 2.76E-17 | 2.91E-16 |
| Vpreb2     | 5   | 90.96202375 | 78.73161028 | -12.23041347 | 2.87E-17 | 3.02E-16 |
| Ppp1r2-ps7 | 8   | 83.85503197 | 70.34864728 | -13.50638469 | 2.95E-17 | 3.10E-16 |
| Grin2c     | 60  | 10.24413688 | 15.8724758  | 5.628338922  | 3.02E-17 | 3.17E-16 |
| 10459M11f  | 78  | 4.890138789 | 3.816073142 | -1.074065647 | 3.03E-17 | 3.18E-16 |
| 32451O06F  | 8   | 21.64134356 | 12.9403234  | -8.701020167 | 3.06E-17 | 3.21E-16 |
| Nudt16     | 42  | 2.605840371 | 1.161381559 | -1.444458812 | 3.05E-17 | 3.21E-16 |
| Ccdc60     | 11  | 56.55095956 | 46.44975971 | -10.10119985 | 3.67E-17 | 3.85E-16 |
| Smpd13a    | 22  | 6.210727101 | 2.972616094 | -3.238111007 | 3.71E-17 | 3.89E-16 |
| Mir3547    | 2   | 70.99556565 | 48.56722057 | -22.42834508 | 4.03E-17 | 4.22E-16 |
| Slc6a3     | 32  | 14.91981038 | 23.85978205 | 8.939971672  | 4.06E-17 | 4.25E-16 |
| 10263651   | 5   | 71.42857143 | 46.04576772 | -25.38280371 | 4.07E-17 | 4.26E-16 |
| Foxl1      | 8   | 49.24170924 | 26.01972351 | -23.22198573 | 4.12E-17 | 4.30E-16 |
| Mcomp1     | 4   | 74.13640168 | 55.96012811 | -18.17627357 | 4.36E-17 | 4.55E-16 |
| Adrb1      | 47  | 15.44809072 | 19.21519149 | 3.767100764  | 4.37E-17 | 4.56E-16 |
| Pla2g2f    | 5   | 88.73789216 | 68.51948052 | -20.21841164 | 4.47E-17 | 4.66E-16 |
| Pabpc6     | 18  | 90.16513779 | 83.40861639 | -6.756521395 | 4.49E-17 | 4.68E-16 |
| Slc35d3    | 43  | 14.23615834 | 18.66783801 | 4.431679668  | 4.63E-17 | 4.82E-16 |
| Tfap2e     | 23  | 14.56888688 | 25.41368038 | 10.8447935   | 4.70E-17 | 4.89E-16 |
| Trim63     | 3   | 70.25131283 | 42.24256126 | -28.00875156 | 4.86E-17 | 5.06E-16 |
| B4galnt2   | 37  | 14.3875145  | 19.50209853 | 5.114584028  | 5.10E-17 | 5.30E-16 |
| Galr3      | 3   | 92.49321364 | 74.8049317  | -17.68828194 | 5.23E-17 | 5.43E-16 |
| Rgs7       | 89  | 23.42785496 | 26.61209382 | 3.184238861  | 5.30E-17 | 5.50E-16 |
| Galnt18    | 44  | 8.400910027 | 6.046944752 | -2.353965275 | 5.97E-17 | 6.19E-16 |
| Pros1      | 26  | 3.020113601 | 1.199870264 | -1.820243336 | 6.13E-17 | 6.35E-16 |
| Fam174b    | 25  | 33.69836409 | 28.79650735 | -4.901856739 | 6.43E-17 | 6.66E-16 |
| Ccdc160    | 18  | 30.44860964 | 22.83519025 | -7.613419393 | 6.51E-17 | 6.74E-16 |
| Zfp629     | 46  | 4.440628876 | 3.07370507  | -1.366923805 | 6.81E-17 | 7.05E-16 |
| Pced1b     | 43  | 11.02401985 | 8.555096819 | -2.46892303  | 6.91E-17 | 7.14E-16 |
| Galnt16    | 110 | 17.86522156 | 15.82591544 | -2.039306125 | 7.34E-17 | 7.58E-16 |

|            |     |             |             |              |          |          |
|------------|-----|-------------|-------------|--------------|----------|----------|
| 130419L09F | 56  | 2.690678727 | 1.527018897 | -1.163659829 | 7.34E-17 | 7.58E-16 |
| Slc38a3    | 41  | 20.32166566 | 16.87753438 | -3.444131278 | 7.56E-17 | 7.79E-16 |
| Ankrd13d   | 8   | 5.128122457 | 1.701740129 | -3.426382328 | 7.56E-17 | 7.79E-16 |
| 700013F07F | 9   | 5.175538849 | 15.27665001 | 10.101111116 | 8.26E-17 | 8.50E-16 |
| Fcgbp      | 9   | 81.39590964 | 66.53666581 | -14.85924382 | 8.69E-17 | 8.94E-16 |
| Hoxd12     | 33  | 40.9340708  | 34.9251661  | -6.008904703 | 8.72E-17 | 8.97E-16 |
| Proz       | 3   | 48.5717523  | 19.38993464 | -29.18181766 | 8.85E-17 | 9.10E-16 |
| Lrch2      | 29  | 31.77828432 | 40.87444732 | 9.096162999  | 9.13E-17 | 9.38E-16 |
| Abat       | 28  | 8.583298956 | 5.313929922 | -3.269369034 | 9.43E-17 | 9.67E-16 |
| Gcgr       | 24  | 28.63361705 | 33.15234935 | 4.518732297  | 9.46E-17 | 9.70E-16 |
| Ccdc183    | 2   | 83.97181757 | 58.06784027 | -25.90397729 | 9.58E-17 | 9.81E-16 |
| Col11a2    | 24  | 38.87876895 | 31.03595871 | -7.842810233 | 9.84E-17 | 1.01E-15 |
| Evl        | 103 | 2.752664203 | 1.73092866  | -1.021735543 | 1.03E-16 | 1.06E-15 |
| Sv2a       | 18  | 4.440663472 | 2.321593671 | -2.119069801 | 1.04E-16 | 1.06E-15 |
| Cox4i2     | 8   | 54.85303383 | 68.5769034  | 13.72386958  | 1.04E-16 | 1.06E-15 |
| Mir433     | 5   | 94.9061059  | 79.24015695 | -15.66594895 | 1.05E-16 | 1.07E-15 |
| Slc4a3     | 26  | 3.51164543  | 1.362858968 | -2.148786461 | 1.15E-16 | 1.17E-15 |
| Hormad1    | 28  | 92.0780049  | 87.85942043 | -4.218584466 | 1.25E-16 | 1.27E-15 |
| Dmxl2      | 114 | 1.972184622 | 0.948157159 | -1.024027463 | 1.29E-16 | 1.31E-15 |
| Rln1       | 9   | 23.77104521 | 16.34736135 | -7.423683864 | 1.30E-16 | 1.32E-15 |
| Slc30a10   | 37  | 23.92958001 | 30.37645783 | 6.44687782   | 1.44E-16 | 1.46E-15 |
| Gm6484     | 4   | 23.25998185 | 9.368241246 | -13.89174061 | 1.49E-16 | 1.52E-15 |
| Mir7019    | 4   | 94.63177592 | 79.56284069 | -15.06893524 | 1.53E-16 | 1.56E-15 |
| Spi1       | 6   | 54.93339275 | 40.71364199 | -14.21975076 | 1.63E-16 | 1.65E-15 |
| Htra4      | 41  | 9.176003144 | 6.725193456 | -2.450809688 | 1.83E-16 | 1.86E-15 |
| Fgfr3      | 106 | 3.831878158 | 2.366594236 | -1.465283922 | 1.96E-16 | 1.99E-15 |
| Ctcflos    | 1   | 70.04132231 | 34.94505495 | -35.09626737 | 2.00E-16 | 2.02E-15 |
| Fhitos     | 1   | 91.46757679 | 53.40501792 | -38.06255887 | 2.00E-16 | 2.02E-15 |
| Lrrc55     | 1   | 100         | 75.77319588 | -24.22680412 | 2.00E-16 | 2.02E-15 |
| Slc25a45   | 1   | 49.14285714 | 21.71189979 | -27.43095735 | 2.00E-16 | 2.02E-15 |
| Zdhhc22    | 1   | 67.76859504 | 34.28571429 | -33.48288076 | 2.00E-16 | 2.02E-15 |
| Psd4       | 1   | 61.80257511 | 25.81818182 | -35.98439329 | 2.00E-16 | 2.02E-15 |
| Hk3        | 1   | 66.43835616 | 16.77018634 | -49.66816983 | 2.00E-16 | 2.02E-15 |
| Mir3080    | 1   | 86.24161074 | 54.06504065 | -32.17657009 | 2.00E-16 | 2.02E-15 |

|            |     |             |             |              |          |          |
|------------|-----|-------------|-------------|--------------|----------|----------|
| Olf773     | 2   | 51.85391104 | 23.04096639 | -28.81294466 | 2.11E-16 | 2.13E-15 |
| Chchd10    | 20  | 1.922437708 | 5.047337525 | 3.124899818  | 2.12E-16 | 2.13E-15 |
| Gm14327    | 3   | 37.30684327 | 15.7798108  | -21.52703246 | 2.14E-16 | 2.15E-15 |
| Kcnc1      | 103 | 12.81116697 | 16.52941918 | 3.718252219  | 2.17E-16 | 2.19E-15 |
| Gnat1      | 1   | 65.42553191 | 24.75728155 | -40.66825036 | 2.22E-16 | 2.23E-15 |
| 130013C21F | 7   | 53.39479702 | 69.43331506 | 16.03851804  | 2.28E-16 | 2.29E-15 |
| Cbln4      | 27  | 54.36271856 | 60.52421969 | 6.161501133  | 2.31E-16 | 2.32E-15 |
| Fam159a    | 22  | 25.04929024 | 34.01706141 | 8.967771166  | 2.43E-16 | 2.44E-15 |
| Syndig1    | 79  | 47.88437533 | 52.41736697 | 4.532991641  | 2.49E-16 | 2.50E-15 |
| Serinc2    | 21  | 8.427484277 | 4.421177319 | -4.006306958 | 2.52E-16 | 2.53E-15 |
| Kremen2    | 35  | 11.62657738 | 7.919308345 | -3.70726903  | 2.73E-16 | 2.73E-15 |
| Plekhb1    | 16  | 35.1541804  | 26.6214     | -8.532780403 | 2.78E-16 | 2.78E-15 |
| Cadps2     | 106 | 27.10144982 | 24.83575774 | -2.265692079 | 2.80E-16 | 2.79E-15 |
| Kcnn1      | 18  | 9.831559602 | 5.171038804 | -4.660520799 | 2.81E-16 | 2.80E-15 |
| Hoxc10     | 19  | 50.62926187 | 58.64877242 | 8.019510555  | 2.84E-16 | 2.84E-15 |
| 130017H08F | 35  | 8.53071835  | 5.837538571 | -2.693179779 | 2.85E-16 | 2.84E-15 |
| Gm833      | 12  | 67.42376112 | 53.98078475 | -13.44297636 | 2.94E-16 | 2.94E-15 |
| Nrk        | 45  | 20.70979826 | 16.25024373 | -4.459554531 | 3.00E-16 | 2.99E-15 |
| Fgf3       | 47  | 11.43040639 | 16.99931204 | 5.568905643  | 3.01E-16 | 3.00E-15 |
| Drd1       | 15  | 35.58785245 | 26.3607265  | -9.227125943 | 3.31E-16 | 3.29E-15 |
| Adgre1     | 1   | 73.45132743 | 20.53571429 | -52.91561315 | 3.33E-16 | 3.31E-15 |
| Chrn3      | 2   | 57.91036236 | 32.32865978 | -25.58170258 | 3.46E-16 | 3.43E-15 |
| Marveld3   | 43  | 9.019820595 | 5.912070979 | -3.107749616 | 3.61E-16 | 3.58E-15 |
| 30215H24F  | 12  | 9.480982358 | 18.3503826  | 8.869400243  | 3.71E-16 | 3.68E-15 |
| Hspb1      | 11  | 8.229607457 | 1.488296442 | -6.741311014 | 3.75E-16 | 3.72E-15 |
| Serpinh1   | 9   | 7.901953646 | 3.17227773  | -4.729675916 | 3.85E-16 | 3.82E-15 |
| Olfm2      | 42  | 4.052393168 | 2.726067425 | -1.326325743 | 4.02E-16 | 3.98E-15 |
| 430036J16F | 4   | 76.02534707 | 59.39584065 | -16.62950643 | 4.07E-16 | 4.03E-15 |
| '00081O15F | 127 | 3.906251378 | 2.927472613 | -0.978778766 | 4.07E-16 | 4.03E-15 |
| Fbxo2      | 41  | 9.420285247 | 6.946768129 | -2.473517118 | 4.10E-16 | 4.06E-15 |
| Ptprt      | 62  | 41.48628596 | 46.45944279 | 4.973156822  | 4.23E-16 | 4.18E-15 |
| Gal        | 30  | 18.2375746  | 26.13664716 | 7.899072563  | 4.39E-16 | 4.34E-15 |
| Galnt14    | 57  | 36.05252594 | 32.43854226 | -3.613983683 | 4.56E-16 | 4.50E-15 |
| Cidea      | 16  | 5.137345879 | 1.980180665 | -3.157165214 | 4.63E-16 | 4.55E-15 |

|            |    |             |             |              |          |          |
|------------|----|-------------|-------------|--------------|----------|----------|
| I30212C06F | 16 | 5.137345879 | 1.980180665 | -3.157165214 | 4.63E-16 | 4.55E-15 |
| Fcgrt      | 7  | 91.61999563 | 79.22187558 | -12.39812005 | 4.65E-16 | 4.58E-15 |
| D2hgdh     | 9  | 15.21284448 | 4.453781621 | -10.75906286 | 5.93E-16 | 5.83E-15 |
| Gm38436    | 38 | 15.11554346 | 19.43937554 | 4.323832085  | 6.09E-16 | 5.99E-15 |
| Ffar4      | 21 | 4.367597459 | 1.684722736 | -2.682874723 | 6.28E-16 | 6.17E-15 |
| Lppr1      | 32 | 24.92918756 | 20.37321979 | -4.555967775 | 7.06E-16 | 6.93E-15 |
| Nags       | 48 | 22.72307476 | 27.333401   | 4.61032624   | 7.26E-16 | 7.12E-15 |
| Igfbpl1    | 39 | 32.01646113 | 37.81975787 | 5.803296737  | 7.28E-16 | 7.13E-15 |
| Ccdc13     | 47 | 37.40075291 | 41.91366826 | 4.512915353  | 7.57E-16 | 7.42E-15 |
| Gm648      | 5  | 89.36247487 | 67.70760835 | -21.65486652 | 7.78E-16 | 7.62E-15 |
| Iglon5     | 37 | 10.40921171 | 6.358879211 | -4.050332496 | 7.85E-16 | 7.68E-15 |
| Siglecf    | 2  | 74.41077441 | 43.31513595 | -31.09563847 | 7.87E-16 | 7.69E-15 |
| Zc3h12b    | 11 | 31.53132238 | 19.83018247 | -11.70113991 | 7.89E-16 | 7.71E-15 |
| Tpm2       | 48 | 30.31458484 | 25.16184859 | -5.152736243 | 7.91E-16 | 7.72E-15 |
| Gas2l2     | 17 | 61.72756481 | 53.12759744 | -8.59996737  | 7.92E-16 | 7.73E-15 |
| Phlda3     | 66 | 2.885786155 | 1.331857869 | -1.553928286 | 7.93E-16 | 7.73E-15 |
| Rcor2      | 34 | 3.640964913 | 2.089314936 | -1.551649977 | 8.45E-16 | 8.23E-15 |
| Pigz       | 25 | 10.60034538 | 5.610429412 | -4.989915966 | 9.29E-16 | 9.05E-15 |
| Hebp2      | 24 | 10.5121984  | 17.05352681 | 6.541328405  | 9.50E-16 | 9.24E-15 |
| Cyp4v3     | 14 | 5.337815979 | 2.092816696 | -3.244999283 | 9.90E-16 | 9.63E-15 |
| Dpf1       | 37 | 4.731237254 | 2.298349855 | -2.432887399 | 1.00E-15 | 9.72E-15 |
| Tal2       | 5  | 13.34204962 | 4.909060539 | -8.432989082 | 1.02E-15 | 9.90E-15 |
| Rasl10a    | 70 | 6.467107766 | 5.342824479 | -1.124283287 | 1.02E-15 | 9.90E-15 |
| Lrcol1     | 6  | 41.77232694 | 30.65674437 | -11.11558257 | 1.02E-15 | 9.93E-15 |
| Thpo       | 18 | 31.20728442 | 41.26870921 | 10.06142479  | 1.04E-15 | 1.01E-14 |
| Hoxa11os   | 50 | 39.25716663 | 34.71661631 | -4.540549995 | 1.16E-15 | 1.13E-14 |
| Galnt6     | 40 | 50.05064777 | 44.80461491 | -5.246032859 | 1.19E-15 | 1.15E-14 |
| Car10      | 39 | 45.30571093 | 50.78853469 | 5.482823756  | 1.26E-15 | 1.22E-14 |
| Egfem1     | 62 | 57.27768876 | 53.62469858 | -3.652990183 | 1.27E-15 | 1.22E-14 |
| Dkk3       | 8  | 58.56336602 | 72.10195725 | 13.53859124  | 1.31E-15 | 1.26E-14 |
| Cldn5      | 18 | 54.05957018 | 61.49421077 | 7.43464059   | 1.31E-15 | 1.26E-14 |
| Mak        | 35 | 34.65407771 | 40.09750244 | 5.443424724  | 1.38E-15 | 1.34E-14 |
| Pstpip1    | 20 | 41.44078096 | 31.79105967 | -9.649721294 | 1.41E-15 | 1.36E-14 |
| Magel2     | 23 | 61.04373505 | 54.83400985 | -6.209725193 | 1.41E-15 | 1.36E-14 |

|            |     |             |             |              |          |          |
|------------|-----|-------------|-------------|--------------|----------|----------|
| Crhr2      | 33  | 20.9859905  | 18.56102851 | -2.424961986 | 1.41E-15 | 1.36E-14 |
| Fgfr4      | 43  | 10.06167138 | 6.927733056 | -3.133938321 | 1.42E-15 | 1.37E-14 |
| Insrr      | 10  | 4.2095895   | 10.4029169  | 6.193327402  | 1.43E-15 | 1.37E-14 |
| Xkr6       | 75  | 38.71179884 | 43.21902851 | 4.507229673  | 1.50E-15 | 1.44E-14 |
| Adcy2      | 92  | 55.58239511 | 52.11792101 | -3.4644741   | 1.53E-15 | 1.47E-14 |
| Arpp21     | 50  | 43.74215531 | 39.63083985 | -4.111315462 | 1.57E-15 | 1.51E-14 |
| Atf3       | 26  | 2.101821447 | 4.729253383 | 2.627431936  | 1.59E-15 | 1.53E-14 |
| C1ql3      | 29  | 9.944404412 | 7.26593759  | -2.678466822 | 1.73E-15 | 1.66E-14 |
| Mmel1      | 6   | 86.72223798 | 69.82085533 | -16.90138266 | 1.79E-15 | 1.72E-14 |
| Asic1      | 90  | 3.597062371 | 2.64149445  | -0.955567921 | 1.81E-15 | 1.73E-14 |
| I30624G23F | 9   | 68.69158879 | 78.4426322  | 9.751043418  | 2.04E-15 | 1.95E-14 |
| Wdr63      | 4   | 92.83426853 | 79.47951657 | -13.35475195 | 2.16E-15 | 2.07E-14 |
| Slco5a1    | 24  | 47.74697532 | 54.79927481 | 7.052299492  | 2.25E-15 | 2.15E-14 |
| Vwa2       | 45  | 7.207601736 | 5.07995194  | -2.127649796 | 2.51E-15 | 2.40E-14 |
| Prdm12     | 32  | 27.38552469 | 23.60062925 | -3.784895442 | 2.71E-15 | 2.59E-14 |
| Rgs16      | 25  | 15.51668779 | 10.94707466 | -4.569613122 | 2.72E-15 | 2.59E-14 |
| Stk26      | 32  | 36.40464853 | 27.87633686 | -8.528311665 | 2.81E-15 | 2.68E-14 |
| Fam222a    | 127 | 3.645589254 | 6.327174255 | 2.681585001  | 2.82E-15 | 2.68E-14 |
| Fam131b    | 57  | 5.589839681 | 4.799975988 | -0.789863693 | 2.93E-15 | 2.79E-14 |
| Mcam       | 42  | 5.664616706 | 2.495613146 | -3.169003561 | 2.97E-15 | 2.83E-14 |
| Fbxo44     | 54  | 7.127815014 | 5.338486594 | -1.78932842  | 3.02E-15 | 2.87E-14 |
| Rbfox3     | 40  | 27.96218496 | 23.88372572 | -4.078459239 | 3.17E-15 | 3.01E-14 |
| Rnf113a1   | 44  | 22.60961136 | 16.43769534 | -6.171916028 | 3.20E-15 | 3.04E-14 |
| Prr30      | 4   | 88.09345479 | 65.6301386  | -22.4633162  | 3.20E-15 | 3.04E-14 |
| Tppp3      | 10  | 6.519892088 | 15.22462427 | 8.704732178  | 3.24E-15 | 3.07E-14 |
| Ckb        | 55  | 11.60039324 | 9.360643821 | -2.239749421 | 3.30E-15 | 3.12E-14 |
| '00001C02F | 20  | 19.77100313 | 14.85031316 | -4.920689971 | 3.58E-15 | 3.39E-14 |
| Tacr1      | 30  | 25.70701428 | 20.21922012 | -5.48779416  | 3.59E-15 | 3.40E-14 |
| Reps2      | 31  | 24.40344298 | 15.90451555 | -8.498927431 | 3.89E-15 | 3.67E-14 |
| Mafa       | 124 | 12.56559929 | 15.23544061 | 2.669841313  | 4.16E-15 | 3.93E-14 |
| Gmpr       | 21  | 28.545366   | 23.0176575  | -5.527708495 | 4.18E-15 | 3.95E-14 |
| I30412C18F | 11  | 5.551660587 | 14.30032874 | 8.748668149  | 4.35E-15 | 4.11E-14 |
| Zfp939     | 15  | 6.664663132 | 2.572742306 | -4.091920825 | 4.46E-15 | 4.21E-14 |
| Adamts5    | 30  | 25.74292439 | 20.26929308 | -5.473631318 | 4.50E-15 | 4.24E-14 |

|            |     |             |             |              |          |          |
|------------|-----|-------------|-------------|--------------|----------|----------|
| I30421N21F | 1   | 96.59863946 | 74.51737452 | -22.08126494 | 4.55E-15 | 4.29E-14 |
| Mir7047    | 3   | 85.42342077 | 61.81768372 | -23.60573705 | 4.69E-15 | 4.41E-14 |
| Rtn4rl1    | 115 | 2.706617009 | 1.880693765 | -0.825923244 | 4.79E-15 | 4.51E-14 |
| Zfp185     | 43  | 26.86973907 | 21.14370251 | -5.726036566 | 4.85E-15 | 4.56E-14 |
| Tmem26     | 12  | 30.04750993 | 39.010101   | 8.962591066  | 4.91E-15 | 4.61E-14 |
| I33429O19F | 4   | 87.87488285 | 66.99873085 | -20.87615199 | 4.91E-15 | 4.61E-14 |
| Boll       | 103 | 73.7486659  | 76.40475126 | 2.656085364  | 5.54E-15 | 5.20E-14 |
| Hspa12a    | 30  | 29.01151076 | 26.32193954 | -2.689571221 | 6.03E-15 | 5.65E-14 |
| Irf8       | 33  | 7.958758408 | 4.463776862 | -3.494981545 | 6.20E-15 | 5.81E-14 |
| Cyp4f14    | 2   | 82.79801807 | 51.81550232 | -30.98251575 | 7.08E-15 | 6.63E-14 |
| Hhat       | 21  | 4.779237617 | 2.478785726 | -2.300451892 | 7.11E-15 | 6.66E-14 |
| Des        | 38  | 17.58616024 | 23.46927664 | 5.883116396  | 7.56E-15 | 7.07E-14 |
| Chst11     | 77  | 2.860116883 | 5.299285289 | 2.439168407  | 7.57E-15 | 7.08E-14 |
| Ngf        | 15  | 5.159184758 | 2.669456347 | -2.489728411 | 7.64E-15 | 7.14E-14 |
| Trip6      | 15  | 7.303679425 | 3.089535119 | -4.214144306 | 7.82E-15 | 7.30E-14 |
| Dock10     | 47  | 21.72056756 | 19.12930179 | -2.591265765 | 8.07E-15 | 7.53E-14 |
| Slc38a1    | 62  | 21.59269057 | 18.52481491 | -3.067875656 | 8.34E-15 | 7.78E-14 |
| Gm15867    | 45  | 3.638511542 | 1.675485377 | -1.963026166 | 8.44E-15 | 7.86E-14 |
| Smlr1      | 3   | 86.91719446 | 62.14886018 | -24.76833428 | 8.43E-15 | 7.86E-14 |
| I33427G06F | 11  | 28.49429246 | 38.36580573 | 9.871513263  | 8.45E-15 | 7.86E-14 |
| Sema4b     | 37  | 10.09691094 | 6.556014484 | -3.540896458 | 8.74E-15 | 8.13E-14 |
| Cblc       | 28  | 15.10009024 | 21.51441125 | 6.414321012  | 8.84E-15 | 8.22E-14 |
| Zfp449     | 17  | 23.38895353 | 16.00047688 | -7.388476646 | 8.87E-15 | 8.23E-14 |
| Odf3b      | 14  | 17.47956689 | 10.37482511 | -7.104741783 | 9.13E-15 | 8.48E-14 |
| Cftr       | 8   | 5.897854478 | 1.742297909 | -4.155556569 | 9.27E-15 | 8.60E-14 |
| Sgsm1      | 20  | 7.232590089 | 3.108133754 | -4.124456335 | 9.52E-15 | 8.83E-14 |
| Mir6921    | 4   | 83.5989887  | 68.41338622 | -15.18560248 | 1.01E-14 | 9.37E-14 |
| Slc22a2    | 4   | 79.4578508  | 60.6377346  | -18.8201162  | 1.12E-14 | 1.04E-13 |
| Tspan6     | 12  | 36.92243275 | 26.96506625 | -9.957366501 | 1.15E-14 | 1.07E-13 |
| Lcn12      | 2   | 66.34212306 | 27.93650794 | -38.40561512 | 1.16E-14 | 1.07E-13 |
| Il1rap     | 33  | 3.410247911 | 1.261477754 | -2.148770157 | 1.17E-14 | 1.08E-13 |
| Kcnf1      | 23  | 9.388178696 | 4.28860365  | -5.099575046 | 1.28E-14 | 1.19E-13 |
| Prph       | 33  | 14.65369465 | 11.47861034 | -3.175084316 | 1.29E-14 | 1.19E-13 |
| Adamts16   | 18  | 15.65754046 | 12.56432067 | -3.093219794 | 1.36E-14 | 1.25E-13 |

|            |     |             |             |              |          |          |
|------------|-----|-------------|-------------|--------------|----------|----------|
| Izumo1r    | 3   | 66.5960052  | 50.06275568 | -16.53324952 | 1.38E-14 | 1.28E-13 |
| Rnf128     | 86  | 19.6700435  | 16.88544584 | -2.784597664 | 1.39E-14 | 1.28E-13 |
| Abcd1      | 13  | 29.55431527 | 16.4287993  | -13.12551597 | 1.41E-14 | 1.30E-13 |
| I33427D14F | 3   | 95.56405896 | 81.78933207 | -13.77472689 | 1.42E-14 | 1.31E-13 |
| Cxxc5      | 69  | 2.790238312 | 1.546059562 | -1.24417875  | 1.44E-14 | 1.33E-13 |
| Gsn        | 60  | 12.69153089 | 9.920422385 | -2.7711085   | 1.46E-14 | 1.34E-13 |
| Ptch2      | 17  | 6.619616802 | 3.457585983 | -3.16203082  | 1.51E-14 | 1.38E-13 |
| Dpysl3     | 47  | 16.88292974 | 14.46697506 | -2.415954688 | 1.59E-14 | 1.46E-13 |
| Pla2g4e    | 3   | 58.01608737 | 41.28847245 | -16.72761492 | 1.62E-14 | 1.49E-13 |
| Sds        | 17  | 36.80409037 | 28.9966641  | -7.807426275 | 1.63E-14 | 1.49E-13 |
| Tmem59l    | 16  | 64.9262434  | 72.51628247 | 7.590039071  | 1.68E-14 | 1.54E-13 |
| Gphn       | 111 | 2.44618189  | 1.475670472 | -0.970511419 | 1.69E-14 | 1.55E-13 |
| Tspan2os   | 9   | 7.785061246 | 2.92128232  | -4.863778926 | 1.73E-14 | 1.58E-13 |
| Izumo2     | 2   | 52.30966217 | 22.78011204 | -29.52955012 | 1.74E-14 | 1.59E-13 |
| Apba2      | 124 | 62.11233116 | 65.50111781 | 3.388786647  | 1.77E-14 | 1.62E-13 |
| Aifm1      | 25  | 24.92008676 | 17.9315678  | -6.98851896  | 1.91E-14 | 1.74E-13 |
| Snta1      | 79  | 3.019584211 | 1.930247215 | -1.089336996 | 2.08E-14 | 1.89E-13 |
| Slc44a5    | 25  | 47.98156961 | 40.55534374 | -7.42622587  | 2.10E-14 | 1.91E-13 |
| Vsx1       | 20  | 14.89495904 | 10.24213706 | -4.65282198  | 2.13E-14 | 1.94E-13 |
| Epha6      | 19  | 40.03473255 | 47.62358471 | 7.588852161  | 2.22E-14 | 2.02E-13 |
| Adamts15   | 10  | 17.47289294 | 26.61977324 | 9.146880302  | 2.37E-14 | 2.16E-13 |
| Mir6538    | 32  | 37.13516625 | 42.99480301 | 5.859636766  | 2.38E-14 | 2.16E-13 |
| Kcnk5      | 5   | 6.811409043 | 15.23271354 | 8.421304495  | 2.70E-14 | 2.46E-13 |
| Ptp4a3     | 86  | 4.409040923 | 2.756645194 | -1.652395729 | 2.71E-14 | 2.47E-13 |
| Isyna1     | 43  | 2.85434083  | 1.541373785 | -1.312967045 | 2.78E-14 | 2.52E-13 |
| Armcx3     | 9   | 38.92844411 | 23.6739525  | -15.25449161 | 2.78E-14 | 2.52E-13 |
| A1cf       | 5   | 71.29472953 | 53.83011149 | -17.46461803 | 2.82E-14 | 2.56E-13 |
| Nppc       | 62  | 6.327373191 | 4.953990535 | -1.373382656 | 2.84E-14 | 2.57E-13 |
| Shisa7     | 22  | 38.84379496 | 44.64992772 | 5.806132763  | 2.88E-14 | 2.61E-13 |
| Bmp2       | 95  | 2.244564229 | 1.435603422 | -0.808960807 | 2.89E-14 | 2.62E-13 |
| Slc45a1    | 39  | 21.30525282 | 25.9175485  | 4.612295683  | 2.96E-14 | 2.68E-13 |
| Gm5122     | 4   | 52.5332869  | 33.36232221 | -19.17096469 | 3.04E-14 | 2.75E-13 |
| Lclat1     | 52  | 2.530358405 | 1.086327706 | -1.4440307   | 3.08E-14 | 2.78E-13 |
| Prkcz      | 116 | 20.28497594 | 19.4478574  | -0.837118543 | 3.11E-14 | 2.81E-13 |



|            |     |             |             |              |          |          |
|------------|-----|-------------|-------------|--------------|----------|----------|
| Pcdhgc5    | 2   | 50.98039216 | 19.39393939 | -31.58645276 | 3.12E-14 | 2.82E-13 |
| Mir196a-1  | 9   | 33.70183647 | 22.37513843 | -11.32669804 | 3.13E-14 | 2.82E-13 |
| Dnajib5    | 1   | 53.68731563 | 26.39593909 | -27.29137655 | 3.22E-14 | 2.90E-13 |
| Fahd2a     | 6   | 1.407501204 | 10.25127894 | 8.843777741  | 3.34E-14 | 3.01E-13 |
| Tmem171    | 22  | 18.28861379 | 13.79971076 | -4.488903028 | 3.38E-14 | 3.04E-13 |
| 130412O13F | 30  | 54.13787939 | 47.64122088 | -6.496658513 | 3.38E-14 | 3.04E-13 |
| Cldn14     | 11  | 61.49729735 | 48.69128378 | -12.80601357 | 3.63E-14 | 3.26E-13 |
| Eps8l2     | 24  | 21.34069512 | 16.54402965 | -4.796665476 | 3.64E-14 | 3.27E-13 |
| 333427I22R | 4   | 81.28450463 | 63.57490409 | -17.70960054 | 3.70E-14 | 3.32E-13 |
| Grp        | 8   | 10.03889515 | 2.253029997 | -7.78586515  | 3.75E-14 | 3.36E-13 |
| Ank1       | 180 | 22.23120982 | 25.96679933 | 3.735589504  | 3.86E-14 | 3.46E-13 |
| Morc4      | 67  | 23.21839261 | 19.43962577 | -3.77876684  | 3.92E-14 | 3.52E-13 |
| Kcnip1     | 49  | 45.7008068  | 41.07772233 | -4.623084469 | 3.93E-14 | 3.52E-13 |
| Sh3bgr     | 9   | 16.8334465  | 8.156608486 | -8.676838012 | 3.99E-14 | 3.58E-13 |
| Kcnj4      | 117 | 6.892793212 | 6.669156025 | -0.223637187 | 4.04E-14 | 3.61E-13 |
| Tbc1d9     | 44  | 12.39915847 | 10.09754083 | -2.301617646 | 4.07E-14 | 3.64E-13 |
| .30012A19F | 36  | 5.298227719 | 2.372452482 | -2.925775237 | 4.11E-14 | 3.67E-13 |
| Thbd       | 9   | 19.12907302 | 32.09611473 | 12.96704171  | 4.25E-14 | 3.79E-13 |
| Pax3       | 25  | 35.8468801  | 42.7996257  | 6.952745602  | 4.92E-14 | 4.39E-13 |
| Zmym3      | 25  | 26.38047446 | 19.77104635 | -6.609428113 | 5.16E-14 | 4.60E-13 |
| Rps6ka6    | 11  | 83.93584701 | 74.12864873 | -9.807198286 | 5.25E-14 | 4.68E-13 |
| Pdzd4      | 49  | 13.62833692 | 10.22676583 | -3.401571091 | 5.35E-14 | 4.77E-13 |
| Aff2       | 48  | 17.53284005 | 12.43646163 | -5.096378418 | 5.39E-14 | 4.80E-13 |
| Ptgfr      | 10  | 22.45528962 | 16.28993975 | -6.16534987  | 5.71E-14 | 5.08E-13 |
| Cdh11      | 39  | 58.74423561 | 51.95037035 | -6.793865266 | 5.95E-14 | 5.29E-13 |
| Cpne9      | 22  | 34.15729494 | 40.5955249  | 6.438229954  | 6.40E-14 | 5.69E-13 |
| Rspo3      | 36  | 7.816075645 | 13.05595209 | 5.23987645   | 6.48E-14 | 5.75E-13 |
| Zfhx2os    | 9   | 87.71485489 | 75.5533969  | -12.16145799 | 6.90E-14 | 6.13E-13 |
| Ttc9       | 63  | 4.623762268 | 3.282470698 | -1.341291571 | 6.98E-14 | 6.19E-13 |
| Sox7       | 80  | 15.04214946 | 16.29444946 | 1.252300007  | 7.00E-14 | 6.21E-13 |
| Hmgn5      | 14  | 28.6647679  | 19.7918504  | -8.872917503 | 7.27E-14 | 6.44E-13 |
| Dnajc22    | 11  | 8.087270112 | 2.824325383 | -5.262944729 | 7.35E-14 | 6.51E-13 |
| Car11      | 15  | 14.31235341 | 25.01075395 | 10.69840054  | 7.41E-14 | 6.55E-13 |
| '00057H15F | 5   | 28.8926389  | 16.06030842 | -12.83233048 | 7.51E-14 | 6.64E-13 |

|          |     |             |             |              |          |          |
|----------|-----|-------------|-------------|--------------|----------|----------|
| Tmem132c | 37  | 45.86373844 | 52.42711357 | 6.563375132  | 7.58E-14 | 6.70E-13 |
| P3h2     | 63  | 2.922779997 | 1.583686558 | -1.339093438 | 7.88E-14 | 6.96E-13 |
| Kcnj11   | 26  | 36.35597659 | 44.278021   | 7.922044414  | 8.22E-14 | 7.26E-13 |
| Csmc3    | 11  | 19.63803513 | 13.31278515 | -6.325249981 | 8.31E-14 | 7.33E-13 |
| Alx4     | 54  | 19.89922886 | 26.79062006 | 6.891391206  | 8.59E-14 | 7.58E-13 |
| Cracr2b  | 7   | 37.07538546 | 24.39359899 | -12.68178646 | 9.09E-14 | 8.01E-13 |
| Esrrg    | 83  | 44.19439387 | 47.09989468 | 2.905500809  | 9.11E-14 | 8.03E-13 |
| Igl1     | 1   | 84.97109827 | 50.62761506 | -34.3434832  | 9.20E-14 | 8.10E-13 |
| Pdha1    | 34  | 22.33530129 | 15.57889487 | -6.756406418 | 9.28E-14 | 8.16E-13 |
| Pcbp3    | 40  | 23.47650426 | 28.93406807 | 5.45756381   | 9.59E-14 | 8.43E-13 |
| Lhx6     | 42  | 15.9680219  | 11.453225   | -4.514796898 | 9.97E-14 | 8.76E-13 |
| Mmp9     | 2   | 67.14285714 | 35.16340812 | -31.97944902 | 1.00E-13 | 8.81E-13 |
| Slc27a2  | 41  | 32.750876   | 37.30987479 | 4.558998793  | 1.06E-13 | 9.28E-13 |
| Gad1     | 17  | 14.30646431 | 11.01632995 | -3.290134355 | 1.06E-13 | 9.31E-13 |
| Syn1     | 7   | 33.60024807 | 15.53024652 | -18.07000155 | 1.07E-13 | 9.36E-13 |
| Syt2     | 63  | 5.099817961 | 7.89552657  | 2.79570861   | 1.13E-13 | 9.87E-13 |
| Sycp2    | 22  | 93.40950248 | 88.48082488 | -4.928677607 | 1.15E-13 | 1.01E-12 |
| Cldn16   | 6   | 85.20545729 | 70.9729324  | -14.23252489 | 1.18E-13 | 1.03E-12 |
| Usp27x   | 10  | 22.40982156 | 13.86777534 | -8.542046221 | 1.21E-13 | 1.06E-12 |
| Hoga1    | 5   | 84.93114454 | 68.02307622 | -16.90806832 | 1.24E-13 | 1.09E-12 |
| Tmem229b | 68  | 3.055410692 | 1.623887245 | -1.431523447 | 1.26E-13 | 1.10E-12 |
| Lhx3     | 29  | 26.49304017 | 29.8494254  | 3.356385232  | 1.29E-13 | 1.12E-12 |
| Pomc     | 5   | 34.10942995 | 22.93089064 | -11.1785393  | 1.30E-13 | 1.13E-12 |
| Uhmk1    | 50  | 2.947317343 | 1.994072506 | -0.953244837 | 1.31E-13 | 1.14E-12 |
| Lfng     | 56  | 14.69621994 | 11.31162692 | -3.384593022 | 1.32E-13 | 1.15E-12 |
| Slc16a2  | 33  | 30.65818341 | 24.69422495 | -5.963958454 | 1.34E-13 | 1.17E-12 |
| Ebf4     | 148 | 5.124070388 | 4.793388954 | -0.330681434 | 1.40E-13 | 1.22E-12 |
| Atp4b    | 4   | 69.37233121 | 55.2431518  | -14.12917941 | 1.43E-13 | 1.25E-12 |
| Pvrl1    | 94  | 2.376591418 | 1.468002437 | -0.908588981 | 1.44E-13 | 1.25E-12 |
| Mir7093  | 15  | 39.92705997 | 28.43588123 | -11.49117874 | 1.48E-13 | 1.29E-12 |
| Lrrc74b  | 11  | 7.074364865 | 2.13515341  | -4.939211456 | 1.50E-13 | 1.30E-12 |
| Ank3     | 5   | 56.76562326 | 42.43421053 | -14.33141273 | 1.51E-13 | 1.31E-12 |
| Wnt11    | 147 | 3.366487363 | 2.522830946 | -0.843656417 | 1.53E-13 | 1.33E-12 |
| Cetn2    | 15  | 26.59588452 | 19.44060052 | -7.155283999 | 1.54E-13 | 1.33E-12 |

|           |     |             |             |              |          |          |
|-----------|-----|-------------|-------------|--------------|----------|----------|
| Pcdh8     | 32  | 42.82853098 | 49.32712731 | 6.498596327  | 1.54E-13 | 1.33E-12 |
| Pak3      | 10  | 32.03314725 | 20.23360174 | -11.79954551 | 1.56E-13 | 1.35E-12 |
| Calml4    | 9   | 16.04579147 | 10.07677458 | -5.969016891 | 1.58E-13 | 1.36E-12 |
| Mir92b    | 16  | 13.10688977 | 6.999280805 | -6.107608964 | 1.61E-13 | 1.40E-12 |
| Arsi      | 48  | 42.40490047 | 39.43097095 | -2.973929522 | 1.63E-13 | 1.41E-12 |
| Platr22   | 7   | 44.26586234 | 29.5604734  | -14.70538895 | 1.72E-13 | 1.49E-12 |
| Mir431    | 11  | 92.44054751 | 82.85458237 | -9.58596514  | 1.76E-13 | 1.51E-12 |
| Ncan      | 6   | 7.693002975 | 18.0763496  | 10.38334663  | 1.75E-13 | 1.51E-12 |
| Gnb3      | 7   | 73.85134511 | 58.91603612 | -14.93530899 | 1.76E-13 | 1.52E-12 |
| Mir6403   | 8   | 89.89581567 | 80.52663486 | -9.36918081  | 1.77E-13 | 1.52E-12 |
| 30074K22F | 126 | 2.967563944 | 2.026155692 | -0.941408252 | 1.78E-13 | 1.53E-12 |
| Mir26a-1  | 9   | 82.84595449 | 90.50060838 | 7.654653893  | 1.84E-13 | 1.59E-12 |
| Lcn9      | 1   | 68.85714286 | 40.63492063 | -28.22222222 | 1.88E-13 | 1.62E-12 |
| Ackr2     | 5   | 90.76193033 | 80.39531278 | -10.36661755 | 1.93E-13 | 1.66E-12 |
| 30201H02F | 23  | 45.72754462 | 52.16979584 | 6.442251217  | 1.94E-13 | 1.67E-12 |
| BC021785  | 5   | 85.52380952 | 68.74686203 | -16.7769475  | 1.95E-13 | 1.67E-12 |
| 30080O11F | 57  | 3.049036512 | 5.116652241 | 2.067615729  | 1.97E-13 | 1.69E-12 |
| Hook1     | 57  | 3.049036512 | 5.116652241 | 2.067615729  | 1.97E-13 | 1.69E-12 |
| Arhgef19  | 5   | 47.12645011 | 34.21643978 | -12.91001033 | 2.01E-13 | 1.73E-12 |
| Parp12    | 74  | 2.625338254 | 0.926327035 | -1.699011218 | 2.03E-13 | 1.74E-12 |
| Cav3      | 4   | 44.37794493 | 24.82128846 | -19.55665647 | 2.15E-13 | 1.84E-12 |
| Pappa     | 33  | 33.68744908 | 29.03738188 | -4.650067207 | 2.24E-13 | 1.92E-12 |
| Mn1       | 171 | 28.96871755 | 28.50606975 | -0.462647806 | 2.25E-13 | 1.92E-12 |
| Rai1      | 103 | 2.868475435 | 1.575385238 | -1.293090197 | 2.33E-13 | 1.99E-12 |
| Ifitm2    | 5   | 32.76340669 | 20.83570661 | -11.92770008 | 2.34E-13 | 2.00E-12 |
| Fcamr     | 2   | 78.06802078 | 54.22632396 | -23.84169682 | 2.36E-13 | 2.01E-12 |
| Vipr1     | 74  | 5.934279811 | 4.072830835 | -1.861448977 | 2.39E-13 | 2.04E-12 |
| Tescl     | 13  | 16.6365062  | 26.18728659 | 9.550780393  | 2.39E-13 | 2.04E-12 |
| Fbrsl1    | 119 | 9.344487674 | 12.35134674 | 3.006859061  | 2.41E-13 | 2.05E-12 |
| Susd5     | 44  | 33.4556475  | 28.67251802 | -4.783129483 | 2.46E-13 | 2.09E-12 |
| Hprt      | 61  | 18.31360318 | 14.40650003 | -3.907103151 | 2.48E-13 | 2.11E-12 |
| Irs3      | 15  | 21.74796125 | 30.2880091  | 8.54004785   | 2.54E-13 | 2.16E-12 |
| Mir7006   | 6   | 88.78730855 | 95.54006062 | 6.752752067  | 2.57E-13 | 2.18E-12 |
| Npr1      | 21  | 6.76919191  | 3.273012172 | -3.496179737 | 2.58E-13 | 2.19E-12 |

|           |    |             |             |              |          |          |
|-----------|----|-------------|-------------|--------------|----------|----------|
| Plin3     | 3  | 5.965811244 | 0.518709446 | -5.447101798 | 2.60E-13 | 2.20E-12 |
| Mapk4     | 47 | 5.154190968 | 4.167494699 | -0.98669627  | 2.84E-13 | 2.41E-12 |
| Sebox     | 4  | 78.89132554 | 58.44128923 | -20.45003631 | 3.05E-13 | 2.59E-12 |
| Rimkla    | 66 | 12.96582564 | 15.8389977  | 2.873172063  | 3.08E-13 | 2.61E-12 |
| Aard      | 33 | 35.65284702 | 40.34947482 | 4.696627796  | 3.55E-13 | 3.01E-12 |
| Ubash3b   | 92 | 3.898490106 | 6.330385379 | 2.431895273  | 3.65E-13 | 3.09E-12 |
| Gyk       | 25 | 20.65107572 | 13.71954635 | -6.931529371 | 3.70E-13 | 3.13E-12 |
| Cdc42ep3  | 98 | 3.055648034 | 1.736499707 | -1.319148327 | 3.81E-13 | 3.23E-12 |
| Tnik      | 32 | 13.39326541 | 10.95048838 | -2.442777035 | 3.83E-13 | 3.24E-12 |
| Terc      | 37 | 11.8601493  | 9.589281026 | -2.270868274 | 3.95E-13 | 3.33E-12 |
| Mir466f-2 | 45 | 3.171248546 | 2.121229319 | -1.050019227 | 3.96E-13 | 3.34E-12 |
| Pvalb     | 1  | 95.40816327 | 70.45454545 | -24.95361781 | 3.99E-13 | 3.36E-12 |
| Pdk3      | 62 | 21.1283783  | 17.13299735 | -3.995380951 | 4.04E-13 | 3.40E-12 |
| Piwil2    | 7  | 93.42194391 | 85.46384368 | -7.958100234 | 4.04E-13 | 3.40E-12 |
| 10051M20f | 6  | 14.0290277  | 6.685454781 | -7.343572923 | 4.04E-13 | 3.40E-12 |
| Otp       | 20 | 42.94676137 | 49.34009563 | 6.393334259  | 4.10E-13 | 3.45E-12 |
| Nyap1     | 1  | 54.38066465 | 27.73333333 | -26.64733132 | 4.43E-13 | 3.73E-12 |
| Uncx      | 57 | 29.25666556 | 35.12778028 | 5.871114723  | 4.51E-13 | 3.80E-12 |
| Nmnat2    | 23 | 29.60968553 | 35.78909736 | 6.179411826  | 4.58E-13 | 3.85E-12 |
| Egfl7     | 38 | 21.66313603 | 17.71922141 | -3.943914618 | 4.98E-13 | 4.18E-12 |
| Pabpc5    | 11 | 23.05318663 | 10.52385399 | -12.52933264 | 5.01E-13 | 4.21E-12 |
| Zbtb8b    | 31 | 16.98146423 | 24.12213325 | 7.140669022  | 5.17E-13 | 4.33E-12 |
| C1qtnf1   | 13 | 61.05604927 | 53.31309553 | -7.74295374  | 5.23E-13 | 4.38E-12 |
| Stk33     | 40 | 19.55768404 | 25.51280727 | 5.955123228  | 5.33E-13 | 4.47E-12 |
| Tdrd6     | 46 | 47.59594626 | 52.73715858 | 5.141212318  | 5.34E-13 | 4.47E-12 |
| Tmem54    | 30 | 6.511819466 | 3.497099648 | -3.014719818 | 6.45E-13 | 5.40E-12 |
| Pkp3      | 16 | 59.07907974 | 50.91100118 | -8.168078554 | 7.13E-13 | 5.96E-12 |
| Xk        | 51 | 14.14486474 | 10.92113953 | -3.223725209 | 7.18E-13 | 6.00E-12 |
| Wdr44     | 42 | 19.21371798 | 12.43186639 | -6.781851592 | 7.29E-13 | 6.09E-12 |
| Arl5c     | 13 | 54.01091785 | 44.60681568 | -9.404102161 | 7.45E-13 | 6.22E-12 |
| Mb        | 6  | 93.8939711  | 85.36808908 | -8.525882022 | 7.45E-13 | 6.22E-12 |
| Slc25a53  | 18 | 25.34417297 | 18.97240297 | -6.371769999 | 7.60E-13 | 6.34E-12 |
| Mir196b   | 30 | 37.0336282  | 42.70197133 | 5.668343129  | 7.64E-13 | 6.37E-12 |
| Lrat      | 5  | 29.94232722 | 16.45169011 | -13.49063711 | 7.73E-13 | 6.45E-12 |

|         |     |             |             |              |          |          |
|---------|-----|-------------|-------------|--------------|----------|----------|
| Kctd12  | 16  | 12.13513484 | 7.623511624 | -4.511623219 | 7.74E-13 | 6.45E-12 |
| Fam155a | 76  | 40.05670001 | 42.71626017 | 2.659560163  | 7.87E-13 | 6.55E-12 |
| Tcea3   | 53  | 4.05099215  | 2.990390236 | -1.060601915 | 7.93E-13 | 6.60E-12 |
| Igf2r   | 53  | 44.36888533 | 51.1707793  | 6.801893971  | 8.07E-13 | 6.71E-12 |
| Morn3   | 11  | 46.6272279  | 36.73942234 | -9.887805558 | 8.27E-13 | 6.87E-12 |
| Mrap2   | 10  | 9.500608505 | 18.07157026 | 8.57096175   | 8.69E-13 | 7.22E-12 |
| Dab2ip  | 117 | 7.799057642 | 6.388290433 | -1.410767209 | 8.83E-13 | 7.33E-12 |
| Rgma    | 70  | 15.94058832 | 14.30859126 | -1.631997059 | 8.88E-13 | 7.36E-12 |
| Cul9    | 31  | 43.45992971 | 48.44348692 | 4.983557212  | 9.15E-13 | 7.58E-12 |
| Gm11213 | 5   | 73.75385089 | 57.05465803 | -16.69919286 | 9.24E-13 | 7.66E-12 |
| S1pr3   | 28  | 25.53712601 | 22.19909856 | -3.338027451 | 9.40E-13 | 7.79E-12 |
| Foxi3   | 42  | 42.63192099 | 38.44316133 | -4.188759652 | 9.46E-13 | 7.83E-12 |
| Nfkbia  | 40  | 5.728310806 | 2.664624876 | -3.06368593  | 9.91E-13 | 8.19E-12 |
| Zim3    | 23  | 83.55327407 | 77.04373086 | -6.509543213 | 1.04E-12 | 8.58E-12 |
| Dnah11  | 7   | 10.39032924 | 19.31029729 | 8.91996805   | 1.08E-12 | 8.92E-12 |
| Nptxr   | 83  | 2.013350236 | 1.232859159 | -0.780491077 | 1.09E-12 | 9.04E-12 |
| Cd8b1   | 2   | 63.34256329 | 36.06709703 | -27.27546626 | 1.10E-12 | 9.09E-12 |
| Emd     | 18  | 17.96338187 | 10.58040926 | -7.382972613 | 1.11E-12 | 9.17E-12 |
| Sema6b  | 43  | 10.19492265 | 7.069143809 | -3.125778843 | 1.11E-12 | 9.19E-12 |
| Tnfsf15 | 8   | 36.20674951 | 22.18962558 | -14.01712393 | 1.12E-12 | 9.23E-12 |
| Tbx3    | 41  | 49.25891647 | 53.35614503 | 4.09722856   | 1.12E-12 | 9.26E-12 |
| Trp73   | 84  | 18.413454   | 16.91808522 | -1.495368776 | 1.14E-12 | 9.37E-12 |
| Rap2c   | 84  | 18.1580473  | 15.12457288 | -3.033474426 | 1.16E-12 | 9.57E-12 |
| Slc6a19 | 11  | 86.81808427 | 76.89595572 | -9.922128553 | 1.20E-12 | 9.89E-12 |
| Zfp354a | 12  | 8.110499168 | 3.64931945  | -4.461179718 | 1.24E-12 | 1.02E-11 |
| Gpsm3   | 6   | 37.09581121 | 51.05757879 | 13.96176758  | 1.28E-12 | 1.05E-11 |
| Cd55b   | 7   | 50.68467895 | 39.8070574  | -10.87762155 | 1.28E-12 | 1.05E-11 |
| Abcc8   | 29  | 20.14808461 | 26.64964142 | 6.501556811  | 1.30E-12 | 1.06E-11 |
| Atp1b1  | 68  | 2.914065733 | 1.042950644 | -1.87111509  | 1.37E-12 | 1.13E-11 |
| Adam2   | 10  | 53.0721019  | 44.1963404  | -8.875761497 | 1.42E-12 | 1.17E-11 |
| Wfdc5   | 3   | 68.0054398  | 43.95269736 | -24.05274244 | 1.52E-12 | 1.25E-11 |
| Hfm1    | 64  | 28.88591025 | 26.29293745 | -2.592972802 | 1.54E-12 | 1.26E-11 |
| Emb     | 50  | 19.16637832 | 23.05811639 | 3.891738073  | 1.62E-12 | 1.33E-11 |
| Skor2   | 21  | 42.67295166 | 48.90713942 | 6.234187755  | 1.65E-12 | 1.35E-11 |

|            |     |             |             |              |          |          |
|------------|-----|-------------|-------------|--------------|----------|----------|
| Kcna3      | 77  | 32.24866967 | 28.77173733 | -3.476932338 | 1.70E-12 | 1.39E-11 |
| Pou5f1     | 8   | 43.304071   | 33.64186843 | -9.66220257  | 1.71E-12 | 1.40E-11 |
| Cacng4     | 125 | 11.38603806 | 14.37845073 | 2.992412668  | 1.77E-12 | 1.45E-11 |
| Drd3       | 5   | 90.60011874 | 77.46268657 | -13.13743217 | 1.79E-12 | 1.46E-11 |
| St5        | 18  | 33.17709458 | 41.15661862 | 7.979524033  | 1.80E-12 | 1.47E-11 |
| Kank1      | 60  | 2.914190824 | 1.626375708 | -1.287815116 | 1.82E-12 | 1.49E-11 |
| Sync       | 21  | 8.138184172 | 3.805778231 | -4.332405942 | 1.84E-12 | 1.50E-11 |
| Krt71      | 6   | 41.86912428 | 32.44651134 | -9.42261294  | 1.86E-12 | 1.52E-11 |
| Krt5       | 5   | 80.86476409 | 71.48646209 | -9.378301999 | 1.87E-12 | 1.52E-11 |
| Neurog2    | 38  | 7.934961959 | 5.65195452  | -2.283007438 | 1.98E-12 | 1.61E-11 |
| Smarca5-ps | 33  | 67.37304981 | 71.24008048 | 3.867030665  | 2.02E-12 | 1.64E-11 |
| Nek5       | 13  | 19.31062068 | 14.28224215 | -5.028378528 | 2.03E-12 | 1.65E-11 |
| Adamts12   | 3   | 25.78616352 | 6.734006734 | -19.05215679 | 2.12E-12 | 1.72E-11 |
| Stxbp5l    | 35  | 18.56327305 | 14.10757642 | -4.455696628 | 2.18E-12 | 1.77E-11 |
| Ramp1      | 35  | 2.052523118 | 1.104194814 | -0.948328304 | 2.19E-12 | 1.78E-11 |
| Fgf4       | 60  | 22.25852967 | 20.28490425 | -1.973625425 | 2.22E-12 | 1.80E-11 |
| Gpr137c    | 73  | 2.315351668 | 1.499574607 | -0.815777062 | 2.23E-12 | 1.81E-11 |
| Ppm1n      | 35  | 5.595224747 | 3.471922388 | -2.12330236  | 2.25E-12 | 1.82E-11 |
| Gm20063    | 12  | 39.95465198 | 33.14864614 | -6.806005834 | 2.37E-12 | 1.92E-11 |
| Stac2      | 23  | 8.37337535  | 16.19928    | 7.825904653  | 2.48E-12 | 2.00E-11 |
| Ecel1      | 37  | 10.36286123 | 15.21206408 | 4.849202856  | 2.54E-12 | 2.06E-11 |
| 33416E03F  | 6   | 71.95042066 | 61.65777011 | -10.29265055 | 2.58E-12 | 2.08E-11 |
| Nbea       | 137 | 2.778595155 | 2.023171361 | -0.755423794 | 2.67E-12 | 2.15E-11 |
| H2-Q7      | 3   | 11.56993466 | 3.832241862 | -7.737692797 | 2.69E-12 | 2.17E-11 |
| Rnf180     | 10  | 47.27104859 | 38.60795578 | -8.663092813 | 2.80E-12 | 2.26E-11 |
| Zbtb8a     | 20  | 3.141805852 | 1.133610053 | -2.008195799 | 2.97E-12 | 2.40E-11 |
| Tal1       | 63  | 18.18738967 | 16.03931525 | -2.148074418 | 3.01E-12 | 2.43E-11 |
| Apobec2    | 5   | 90.09284156 | 79.11116451 | -10.98167706 | 3.12E-12 | 2.51E-11 |
| '00116B05F | 5   | 53.79945713 | 41.65021639 | -12.14924075 | 3.28E-12 | 2.64E-11 |
| Rbmxl2     | 66  | 74.34915627 | 77.84715214 | 3.497995878  | 3.31E-12 | 2.66E-11 |
| Nefl       | 36  | 5.32675135  | 9.015831512 | 3.689080162  | 3.33E-12 | 2.68E-11 |
| Pdzrn3     | 49  | 55.01011683 | 60.25978877 | 5.249671936  | 3.83E-12 | 3.08E-11 |
| Tdrp       | 74  | 4.31276086  | 6.194565919 | 1.881805059  | 3.86E-12 | 3.10E-11 |
| Nr2f2      | 143 | 3.402426743 | 2.706077847 | -0.696348896 | 3.98E-12 | 3.19E-11 |

|            |     |             |             |              |          |          |
|------------|-----|-------------|-------------|--------------|----------|----------|
| Olfm1      | 234 | 9.36962688  | 11.19276153 | 1.823134652  | 4.12E-12 | 3.30E-11 |
| Gdpd3      | 4   | 48.05790126 | 33.61512935 | -14.44277191 | 4.25E-12 | 3.40E-11 |
| Mir434     | 3   | 93.53372418 | 83.3637507  | -10.16997348 | 4.36E-12 | 3.49E-11 |
| Acaa1b     | 19  | 5.744468904 | 11.75359964 | 6.009130737  | 4.51E-12 | 3.61E-11 |
| Gm53       | 25  | 22.71338435 | 18.39427212 | -4.319112232 | 4.56E-12 | 3.65E-11 |
| Dpep1      | 11  | 61.09464515 | 51.79576307 | -9.298882083 | 4.64E-12 | 3.71E-11 |
| Rftn1      | 67  | 49.38759715 | 51.78541558 | 2.397818436  | 5.04E-12 | 4.03E-11 |
| Flt3       | 22  | 6.527447729 | 3.327120205 | -3.200327524 | 5.10E-12 | 4.07E-11 |
| Nt5c1a     | 18  | 19.42189795 | 27.35682593 | 7.934927988  | 5.11E-12 | 4.08E-11 |
| Cdh8       | 33  | 55.90188956 | 60.9162618  | 5.014372244  | 5.16E-12 | 4.11E-11 |
| Tmem215    | 14  | 53.81228047 | 61.41120436 | 7.59892389   | 5.16E-12 | 4.12E-11 |
| Esm1       | 10  | 45.81797094 | 54.45273659 | 8.634765652  | 5.19E-12 | 4.14E-11 |
| Prss12     | 72  | 4.986827848 | 3.753566979 | -1.233260869 | 5.50E-12 | 4.38E-11 |
| Bcl2l2     | 17  | 4.452916477 | 2.071945431 | -2.380971047 | 5.71E-12 | 4.55E-11 |
| Ppp1r3b    | 9   | 31.18416434 | 22.64659926 | -8.537565073 | 6.04E-12 | 4.81E-11 |
| Grk1       | 8   | 97.1597034  | 90.98774491 | -6.171958487 | 6.22E-12 | 4.95E-11 |
| Brsk2      | 95  | 9.032301231 | 11.94316706 | 2.910865831  | 6.28E-12 | 4.99E-11 |
| Fam221b    | 2   | 11.12159784 | 0.888941103 | -10.23265673 | 6.32E-12 | 5.02E-11 |
| Bmyc       | 35  | 10.39719633 | 7.656470898 | -2.740725429 | 6.40E-12 | 5.08E-11 |
| 130455G09F | 2   | 77.69723093 | 43.63131313 | -34.0659178  | 6.47E-12 | 5.13E-11 |
| Rbakdn     | 4   | 65.21093286 | 48.87662441 | -16.33430845 | 6.64E-12 | 5.26E-11 |
| Lincrd1    | 2   | 84.50635386 | 62.13499098 | -22.37136288 | 7.30E-12 | 5.79E-11 |
| Krt73      | 3   | 74.98857816 | 50.82621083 | -24.16236734 | 7.54E-12 | 5.98E-11 |
| Tbkbp1     | 16  | 6.80068922  | 3.656853923 | -3.143835297 | 7.67E-12 | 6.07E-11 |
| Myo3a      | 8   | 41.49287794 | 32.41266798 | -9.080209962 | 7.77E-12 | 6.15E-11 |
| Scn5a      | 131 | 18.99664761 | 17.40082869 | -1.59581892  | 7.90E-12 | 6.25E-11 |
| Tert       | 35  | 5.032584677 | 3.331439227 | -1.701145449 | 7.91E-12 | 6.25E-11 |
| Arhgap28   | 40  | 57.71947675 | 62.84162322 | 5.122146471  | 7.99E-12 | 6.32E-11 |
| Hymai      | 49  | 51.43467536 | 55.06687661 | 3.632201248  | 8.07E-12 | 6.37E-11 |
| Ptpn18     | 29  | 4.095088578 | 1.712612199 | -2.382476378 | 8.12E-12 | 6.41E-11 |
| Col9a1     | 5   | 91.3904326  | 78.72609111 | -12.66434148 | 8.27E-12 | 6.52E-11 |
| Fbln7      | 16  | 7.60079628  | 4.066600857 | -3.534195423 | 8.50E-12 | 6.70E-11 |
| Gjb1       | 12  | 75.14987529 | 83.97573177 | 8.825856485  | 8.98E-12 | 7.08E-11 |
| 130504O13F | 3   | 86.2949808  | 66.18652744 | -20.10845337 | 9.25E-12 | 7.28E-11 |

|            |     |             |             |              |          |          |
|------------|-----|-------------|-------------|--------------|----------|----------|
| Itgb8      | 7   | 57.14111432 | 67.30686366 | 10.16574934  | 9.37E-12 | 7.38E-11 |
| Mir143     | 4   | 96.1979299  | 74.99981428 | -21.19811562 | 9.44E-12 | 7.43E-11 |
| Mmp23      | 48  | 51.29462016 | 54.6440809  | 3.349460738  | 1.04E-11 | 8.19E-11 |
| Snx31      | 14  | 49.25118895 | 55.69230541 | 6.441116467  | 1.05E-11 | 8.23E-11 |
| Foxo4      | 7   | 22.08282823 | 10.57657745 | -11.50625078 | 1.06E-11 | 8.34E-11 |
| Hspa1l     | 9   | 7.378211315 | 3.238990252 | -4.139221063 | 1.06E-11 | 8.34E-11 |
| Igf2bp3    | 16  | 41.33543217 | 49.62342736 | 8.287995187  | 1.10E-11 | 8.64E-11 |
| Tmeff1     | 111 | 2.610235717 | 1.896928889 | -0.713306829 | 1.11E-11 | 8.68E-11 |
| 21504E06F  | 8   | 34.16090209 | 46.91785042 | 12.75694833  | 1.11E-11 | 8.72E-11 |
| Themis2    | 18  | 13.0283108  | 17.97571178 | 4.947400981  | 1.12E-11 | 8.81E-11 |
| Ffar1      | 6   | 85.31615282 | 70.76983938 | -14.54631344 | 1.14E-11 | 8.96E-11 |
| Rgs3       | 7   | 81.29253197 | 61.91248711 | -19.38004486 | 1.18E-11 | 9.27E-11 |
| Btbd3      | 77  | 9.800608765 | 7.096360022 | -2.704248744 | 1.19E-11 | 9.28E-11 |
| Nnat       | 16  | 74.55656007 | 81.69633051 | 7.139770437  | 1.27E-11 | 9.92E-11 |
| Gm16551    | 23  | 30.95683323 | 26.03774318 | -4.919090043 | 1.29E-11 | 1.00E-10 |
| Igfals     | 4   | 66.61833387 | 55.28253885 | -11.33579502 | 1.29E-11 | 1.01E-10 |
| Hoxa9      | 1   | 42.33870968 | 14.47963801 | -27.85907167 | 1.29E-11 | 1.01E-10 |
| Fezf1      | 17  | 48.35601035 | 56.67510676 | 8.319096408  | 1.29E-11 | 1.01E-10 |
| Il27ra     | 19  | 4.879561416 | 2.701822872 | -2.177738545 | 1.34E-11 | 1.05E-10 |
| Prm1       | 11  | 79.17384248 | 87.77160052 | 8.597758045  | 1.36E-11 | 1.06E-10 |
| 700123I01R | 3   | 60.15035013 | 43.50949198 | -16.64085815 | 1.38E-11 | 1.07E-10 |
| Bend4      | 44  | 14.62421609 | 11.43207806 | -3.192138039 | 1.38E-11 | 1.08E-10 |
| Chst15     | 44  | 1.904047516 | 3.705354403 | 1.801306886  | 1.43E-11 | 1.11E-10 |
| Epha10     | 27  | 24.9248796  | 31.26558737 | 6.340707768  | 1.43E-11 | 1.11E-10 |
| Xiap       | 17  | 26.48706696 | 18.77651792 | -7.710549039 | 1.48E-11 | 1.15E-10 |
| 30012L18F  | 36  | 3.175537674 | 1.434194386 | -1.741343287 | 1.51E-11 | 1.18E-10 |
| Il1r1      | 20  | 5.098772754 | 2.19533176  | -2.903440994 | 1.62E-11 | 1.25E-10 |
| Lingo2     | 52  | 31.9972928  | 28.10858537 | -3.888707431 | 1.64E-11 | 1.27E-10 |
| Nlrp2      | 1   | 76.19047619 | 27.88461538 | -48.30586081 | 1.70E-11 | 1.32E-10 |
| 32441J04R  | 3   | 69.69177018 | 50.38895504 | -19.30281514 | 1.71E-11 | 1.33E-10 |
| Zfp280c    | 45  | 25.19021237 | 20.37113781 | -4.819074557 | 1.71E-11 | 1.33E-10 |
| Prtg       | 115 | 6.737947998 | 5.90271327  | -0.835234728 | 1.72E-11 | 1.33E-10 |
| Vsnl1      | 2   | 45.12195122 | 19.29824561 | -25.82370561 | 1.74E-11 | 1.35E-10 |
| Ltb        | 6   | 52.51048444 | 42.10014567 | -10.41033877 | 1.75E-11 | 1.35E-10 |



|            |     |             |             |              |          |          |
|------------|-----|-------------|-------------|--------------|----------|----------|
| Iqsec3     | 33  | 51.97601959 | 46.43963657 | -5.536383022 | 1.75E-11 | 1.35E-10 |
| Sorcs3     | 76  | 57.82627143 | 60.87973385 | 3.053462416  | 1.76E-11 | 1.36E-10 |
| i10524H06F | 32  | 5.432350942 | 3.39959412  | -2.032756822 | 1.83E-11 | 1.41E-10 |
| Nfe2l3     | 27  | 8.58101234  | 4.702190081 | -3.878822259 | 1.95E-11 | 1.50E-10 |
| Zkscan2    | 21  | 44.31234412 | 54.23035889 | 9.91801477   | 1.98E-11 | 1.53E-10 |
| Foxf2      | 58  | 3.628095085 | 1.714116656 | -1.91397843  | 2.17E-11 | 1.67E-10 |
| Fam46a     | 28  | 4.732127983 | 2.954968427 | -1.777159555 | 2.23E-11 | 1.72E-10 |
| i30011G23F | 33  | 3.348980458 | 1.396500028 | -1.95248043  | 2.28E-11 | 1.75E-10 |
| Mir1905    | 44  | 88.70199636 | 90.42200325 | 1.720006891  | 2.32E-11 | 1.79E-10 |
| Frem3      | 7   | 16.49859944 | 8.134234814 | -8.364364626 | 2.36E-11 | 1.81E-10 |
| Hs6st2     | 53  | 33.23558915 | 29.13422482 | -4.101364325 | 2.36E-11 | 1.82E-10 |
| Trpm3      | 10  | 21.11338929 | 27.96323449 | 6.849845202  | 2.41E-11 | 1.86E-10 |
| Msmg       | 3   | 88.5051617  | 73.97532863 | -14.52983307 | 2.58E-11 | 1.99E-10 |
| Osgin1     | 7   | 14.82427563 | 8.315986417 | -6.508289212 | 2.61E-11 | 2.00E-10 |
| Xkr7       | 48  | 43.18653844 | 48.19404178 | 5.007503344  | 2.66E-11 | 2.04E-10 |
| Gm15401    | 1   | 71.2        | 28.03738318 | -43.16261682 | 2.66E-11 | 2.04E-10 |
| Sphk1      | 127 | 6.193201119 | 4.512336249 | -1.68086487  | 2.70E-11 | 2.07E-10 |
| Lipg       | 22  | 6.909657313 | 3.655979223 | -3.25367809  | 2.71E-11 | 2.08E-10 |
| .10015C05F | 3   | 59.31656995 | 41.96976023 | -17.34680973 | 2.79E-11 | 2.13E-10 |
| Cacna1e    | 20  | 42.14899003 | 37.33157629 | -4.817413742 | 2.80E-11 | 2.14E-10 |
| 30119M05f  | 2   | 45.2991453  | 17.96296296 | -27.33618234 | 2.83E-11 | 2.16E-10 |
| Plekhg6    | 24  | 8.09609373  | 4.839445642 | -3.256648088 | 2.89E-11 | 2.21E-10 |
| Aym1       | 6   | 38.13223286 | 22.47924619 | -15.65298667 | 2.91E-11 | 2.23E-10 |
| Sh3kbp1    | 63  | 19.51711866 | 16.39631597 | -3.120802694 | 2.92E-11 | 2.23E-10 |
| Capn9      | 2   | 88.28462008 | 72.14444659 | -16.14017348 | 2.93E-11 | 2.24E-10 |
| Robo2      | 21  | 27.8120737  | 21.70298877 | -6.109084931 | 2.95E-11 | 2.25E-10 |
| Sptbn1     | 18  | 55.99179427 | 63.15229075 | 7.160496482  | 2.96E-11 | 2.26E-10 |
| Igsf10     | 5   | 12.51814924 | 26.09067797 | 13.57252873  | 3.02E-11 | 2.30E-10 |
| C2cd4b     | 36  | 11.54291076 | 9.280907943 | -2.262002814 | 3.03E-11 | 2.31E-10 |
| Tll2       | 17  | 9.21837014  | 5.954897759 | -3.263472381 | 3.24E-11 | 2.47E-10 |
| Rpl10l     | 16  | 94.05039059 | 87.9077182  | -6.142672389 | 3.25E-11 | 2.47E-10 |
| Pou3f4     | 8   | 72.02845165 | 54.78136358 | -17.24708807 | 3.26E-11 | 2.48E-10 |
| Tex101     | 21  | 89.388295   | 81.558774   | -7.829520995 | 3.66E-11 | 2.78E-10 |
| Gm17455    | 2   | 70.39969834 | 53.85738417 | -16.54231417 | 3.88E-11 | 2.95E-10 |

|           |     |             |             |              |          |          |
|-----------|-----|-------------|-------------|--------------|----------|----------|
| Lrrtm2    | 5   | 67.5269957  | 86.8577868  | 19.3307911   | 3.92E-11 | 2.98E-10 |
| Snap91    | 113 | 25.19284132 | 24.31999195 | -0.872849372 | 3.97E-11 | 3.01E-10 |
| Gm7325    | 13  | 77.38033438 | 70.87818038 | -6.502154002 | 4.00E-11 | 3.03E-10 |
| Gm1600    | 3   | 48.55288118 | 32.80884684 | -15.74403435 | 4.11E-11 | 3.12E-10 |
| Mmp3      | 1   | 92.88888889 | 68.5        | -24.38888889 | 4.19E-11 | 3.17E-10 |
| Wt1os     | 13  | 51.03311627 | 61.99292564 | 10.95980938  | 4.20E-11 | 3.18E-10 |
| 33415F23F | 14  | 91.61470783 | 82.96110673 | -8.653601105 | 4.21E-11 | 3.19E-10 |
| Abcb7     | 24  | 16.13331541 | 11.21934753 | -4.913967881 | 4.26E-11 | 3.22E-10 |
| Sox14     | 38  | 19.83948583 | 18.21696579 | -1.622520044 | 4.28E-11 | 3.24E-10 |
| Gucy2e    | 11  | 37.74748924 | 45.99575598 | 8.248266736  | 4.52E-11 | 3.42E-10 |
| Olf368    | 2   | 19.30430119 | 7.331844383 | -11.9724568  | 4.54E-11 | 3.43E-10 |
| Slc7a8    | 7   | 9.422101316 | 27.17878946 | 17.75668815  | 4.63E-11 | 3.50E-10 |
| Fgf12     | 205 | 50.33285101 | 51.75139853 | 1.418547523  | 4.69E-11 | 3.54E-10 |
| Fn3k      | 12  | 5.585854168 | 2.892131287 | -2.693722881 | 4.70E-11 | 3.55E-10 |
| Gabrg3    | 50  | 45.92409193 | 41.03967731 | -4.884414626 | 4.86E-11 | 3.66E-10 |
| Scrt1     | 47  | 11.67288096 | 8.511826287 | -3.161054671 | 4.89E-11 | 3.69E-10 |
| Tgm1      | 20  | 63.37350268 | 70.17564771 | 6.80214503   | 5.30E-11 | 3.99E-10 |
| Apba1     | 51  | 3.805283837 | 2.547041324 | -1.258242513 | 5.30E-11 | 3.99E-10 |
| Neurod1   | 2   | 37.91208791 | 68.01730921 | 30.10522129  | 5.38E-11 | 4.05E-10 |
| Pkd1l2    | 10  | 62.69776821 | 53.10321062 | -9.594557583 | 5.52E-11 | 4.15E-10 |
| Reep1     | 30  | 15.95162393 | 13.5028638  | -2.448760123 | 5.56E-11 | 4.18E-10 |
| Rhbdl1    | 6   | 17.23876079 | 9.90123172  | -7.337529066 | 5.68E-11 | 4.26E-10 |
| Cd19      | 4   | 43.50305421 | 30.42578287 | -13.07727134 | 5.72E-11 | 4.29E-10 |
| Slc16a10  | 29  | 2.479070209 | 1.087372269 | -1.39169794  | 5.73E-11 | 4.30E-10 |
| Tmem231   | 26  | 8.336062398 | 5.23810825  | -3.097954148 | 5.76E-11 | 4.32E-10 |
| Spata32   | 9   | 12.86535696 | 7.773145269 | -5.092211689 | 6.16E-11 | 4.62E-10 |
| Mir152    | 33  | 8.237416307 | 11.5225333  | 3.285116997  | 6.17E-11 | 4.63E-10 |
| Npw       | 42  | 31.26216236 | 35.82453031 | 4.562367956  | 6.28E-11 | 4.71E-10 |
| Stmn4     | 8   | 37.95098253 | 26.86873657 | -11.08224595 | 6.36E-11 | 4.76E-10 |
| Gm6583    | 6   | 91.10323776 | 81.07700394 | -10.02623382 | 6.45E-11 | 4.82E-10 |
| Gda       | 11  | 11.55608137 | 6.836153939 | -4.719927432 | 6.58E-11 | 4.92E-10 |
| Insl3     | 4   | 89.39331995 | 80.47968523 | -8.913634716 | 6.60E-11 | 4.94E-10 |
| Stra6     | 9   | 64.38431807 | 74.76976212 | 10.38544405  | 6.69E-11 | 5.00E-10 |
| Pde5a     | 31  | 8.217685215 | 10.33434584 | 2.116660622  | 6.73E-11 | 5.03E-10 |

|           |     |             |             |              |          |          |
|-----------|-----|-------------|-------------|--------------|----------|----------|
| Spata18   | 21  | 12.8927424  | 8.935718003 | -3.9570244   | 6.80E-11 | 5.07E-10 |
| Htra3     | 25  | 31.40629606 | 36.98015403 | 5.573857968  | 6.89E-11 | 5.14E-10 |
| Smim11    | 5   | 24.4083292  | 13.05855443 | -11.34977476 | 6.95E-11 | 5.18E-10 |
| Sstr5     | 17  | 9.957190909 | 4.917443072 | -5.039747838 | 7.22E-11 | 5.38E-10 |
| Tmem8     | 49  | 2.224862386 | 1.192220444 | -1.032641943 | 7.27E-11 | 5.41E-10 |
| Nfatc4    | 13  | 25.69630747 | 35.13092149 | 9.434614024  | 7.56E-11 | 5.63E-10 |
| Lage3     | 12  | 22.43559982 | 15.0081908  | -7.427409016 | 7.56E-11 | 5.63E-10 |
| Lmo2      | 44  | 9.4311019   | 7.846118078 | -1.584983821 | 7.58E-11 | 5.64E-10 |
| 33412E24F | 2   | 98.29699003 | 81.86320755 | -16.43378248 | 7.96E-11 | 5.91E-10 |
| Rbm46     | 86  | 62.38788051 | 63.49146112 | 1.103580613  | 8.01E-11 | 5.95E-10 |
| Sfmbt1    | 127 | 3.37072063  | 2.317958618 | -1.052762011 | 8.36E-11 | 6.20E-10 |
| Gpr162    | 29  | 3.324320721 | 2.029256578 | -1.295064143 | 9.24E-11 | 6.86E-10 |
| Cst12     | 2   | 68.51953468 | 45.75164555 | -22.76788913 | 9.42E-11 | 6.99E-10 |
| 00002P13F | 42  | 47.39483299 | 51.07707418 | 3.682241193  | 9.45E-11 | 7.01E-10 |
| Gm19424   | 5   | 81.01656078 | 72.30585453 | -8.710706249 | 9.55E-11 | 7.08E-10 |
| Adgrb1    | 60  | 12.82276461 | 15.67972234 | 2.856957732  | 1.00E-10 | 7.44E-10 |
| Rassf5    | 112 | 6.679545288 | 5.08618072  | -1.593364567 | 1.06E-10 | 7.84E-10 |
| Cyp2j6    | 15  | 27.32314122 | 34.93864267 | 7.61550145   | 1.07E-10 | 7.94E-10 |
| Dock6     | 40  | 7.069863103 | 4.890006375 | -2.179856729 | 1.08E-10 | 8.02E-10 |
| Ndufc2    | 11  | 60.30807025 | 54.9947276  | -5.313342647 | 1.12E-10 | 8.27E-10 |
| Fshr      | 3   | 93.88185654 | 78.70327775 | -15.17857879 | 1.13E-10 | 8.35E-10 |
| Asphd2    | 1   | 66.36363636 | 25          | -41.36363636 | 1.15E-10 | 8.49E-10 |
| Adad2     | 11  | 85.26917249 | 75.64579001 | -9.623382485 | 1.17E-10 | 8.65E-10 |
| Doc2a     | 56  | 12.47556368 | 9.936878572 | -2.53868511  | 1.23E-10 | 9.11E-10 |
| Foxd2     | 87  | 2.683878635 | 1.589448517 | -1.094430118 | 1.25E-10 | 9.20E-10 |
| Zfp385a   | 29  | 3.788304373 | 7.172378684 | 3.384074312  | 1.25E-10 | 9.20E-10 |
| Rgl1      | 44  | 1.486959149 | 3.1538599   | 1.666900751  | 1.28E-10 | 9.41E-10 |
| Cbs       | 39  | 4.325737253 | 2.852685024 | -1.473052229 | 1.28E-10 | 9.46E-10 |
| Nrg2      | 51  | 2.265033603 | 1.351884757 | -0.913148846 | 1.29E-10 | 9.51E-10 |
| Gria2     | 23  | 46.8397791  | 41.94318838 | -4.896590726 | 1.34E-10 | 9.85E-10 |
| Caskin1   | 80  | 5.549807243 | 4.047818859 | -1.501988384 | 1.35E-10 | 9.90E-10 |
| Egflam    | 39  | 20.5945038  | 17.56922522 | -3.025278581 | 1.37E-10 | 1.01E-09 |
| Ftmt      | 6   | 81.75975863 | 65.54560759 | -16.21415104 | 1.37E-10 | 1.01E-09 |
| Vasn      | 5   | 14.08581277 | 3.805660345 | -10.28015243 | 1.45E-10 | 1.06E-09 |

|            |     |             |             |              |          |          |
|------------|-----|-------------|-------------|--------------|----------|----------|
| Mdga1      | 123 | 2.026238493 | 1.598389948 | -0.427848545 | 1.47E-10 | 1.08E-09 |
| Tmem121    | 18  | 2.776413152 | 1.503970693 | -1.272442459 | 1.47E-10 | 1.08E-09 |
| Fam189a2   | 99  | 3.404391074 | 2.687864866 | -0.716526208 | 1.53E-10 | 1.12E-09 |
| Wnt10a     | 15  | 10.63186866 | 6.562673973 | -4.069194687 | 1.55E-10 | 1.13E-09 |
| P2rx1      | 5   | 50.95359453 | 37.46298771 | -13.49060682 | 1.61E-10 | 1.18E-09 |
| Lurap1     | 20  | 5.517940518 | 2.289708882 | -3.228231636 | 1.62E-10 | 1.18E-09 |
| Gm14379    | 17  | 20.10461393 | 12.85684033 | -7.247773601 | 1.69E-10 | 1.24E-09 |
| Oasl1      | 10  | 33.58513298 | 24.92084439 | -8.664288587 | 1.70E-10 | 1.25E-09 |
| Slc44a4    | 9   | 56.07886963 | 63.99470513 | 7.915835501  | 1.72E-10 | 1.26E-09 |
| Wnt2       | 35  | 14.15467545 | 19.2638447  | 5.109169248  | 1.74E-10 | 1.27E-09 |
| Slc7a10    | 63  | 22.11536151 | 25.49991988 | 3.384558371  | 1.76E-10 | 1.29E-09 |
| Ppp1r1a    | 44  | 11.32845737 | 15.88625394 | 4.557796573  | 1.79E-10 | 1.30E-09 |
| Tgfb1i1    | 7   | 14.11069146 | 8.01589151  | -6.094799954 | 1.83E-10 | 1.34E-09 |
| Ppp1r2-ps3 | 9   | 64.90118672 | 73.38160385 | 8.480417129  | 1.90E-10 | 1.39E-09 |
| Lpl        | 11  | 9.694110036 | 4.464962423 | -5.229147613 | 1.91E-10 | 1.39E-09 |
| Msantd3    | 113 | 2.893603139 | 1.792277697 | -1.101325441 | 1.95E-10 | 1.42E-09 |
| Fbln1      | 45  | 7.468165828 | 6.317067879 | -1.151097949 | 1.99E-10 | 1.45E-09 |
| 130599N23F | 55  | 19.75715632 | 23.69950871 | 3.942352386  | 2.00E-10 | 1.46E-09 |
| Kcnq5      | 61  | 3.616927134 | 2.864167713 | -0.752759421 | 2.16E-10 | 1.57E-09 |
| Unc5c      | 75  | 48.92527957 | 52.27622461 | 3.350945045  | 2.17E-10 | 1.58E-09 |
| Elk1       | 8   | 20.55310132 | 12.61224787 | -7.940853451 | 2.18E-10 | 1.59E-09 |
| Zfa-ps     | 16  | 89.92698268 | 81.63682385 | -8.290158836 | 2.19E-10 | 1.59E-09 |
| Mrc2       | 15  | 11.34233832 | 17.16225203 | 5.819913711  | 2.20E-10 | 1.60E-09 |
| Tmem28     | 113 | 46.84823573 | 51.41161104 | 4.563375316  | 2.21E-10 | 1.61E-09 |
| Mycbpap    | 16  | 13.42825418 | 7.22271549  | -6.205538693 | 2.24E-10 | 1.62E-09 |
| Morc2b     | 5   | 65.66195286 | 43.9729575  | -21.68899536 | 2.36E-10 | 1.71E-09 |
| Dok6       | 55  | 46.12389067 | 42.04553641 | -4.07835426  | 2.36E-10 | 1.71E-09 |
| Mir6948    | 17  | 93.03190562 | 88.26839795 | -4.763507672 | 2.37E-10 | 1.71E-09 |
| Sox10      | 5   | 38.73498886 | 27.00776998 | -11.72721888 | 2.37E-10 | 1.71E-09 |
| Gabra1     | 3   | 42.87662338 | 62.5415835  | 19.66496012  | 2.43E-10 | 1.76E-09 |
| Sigirr     | 7   | 9.913398398 | 3.728430743 | -6.184967654 | 2.44E-10 | 1.76E-09 |
| Shroom2    | 65  | 18.35034952 | 14.75572061 | -3.594628917 | 2.49E-10 | 1.80E-09 |
| Hspa1a     | 9   | 6.743686782 | 2.875468836 | -3.868217946 | 2.50E-10 | 1.81E-09 |
| Sez6       | 91  | 6.620384113 | 5.676163983 | -0.94422013  | 2.58E-10 | 1.87E-09 |

|            |     |             |             |              |          |          |
|------------|-----|-------------|-------------|--------------|----------|----------|
| Fam132a    | 7   | 29.10535365 | 41.12566554 | 12.02031189  | 2.61E-10 | 1.88E-09 |
| Cldn13     | 2   | 78.47082495 | 54.60752953 | -23.86329542 | 2.65E-10 | 1.91E-09 |
| Hrc        | 3   | 93.24004505 | 79.7050938  | -13.53495125 | 2.65E-10 | 1.91E-09 |
| Ikzf1      | 127 | 32.31443594 | 30.98724245 | -1.327193482 | 2.72E-10 | 1.96E-09 |
| Spon1      | 31  | 13.59077259 | 19.63949268 | 6.048720094  | 2.75E-10 | 1.98E-09 |
| Tmem151b   | 50  | 7.516561433 | 10.15347906 | 2.636917629  | 2.77E-10 | 1.99E-09 |
| Hoxb7      | 63  | 26.6053296  | 24.57027616 | -2.035053449 | 2.78E-10 | 2.00E-09 |
| Nkx3-1     | 25  | 23.45701518 | 18.2897605  | -5.167254677 | 2.86E-10 | 2.06E-09 |
| L1td1      | 17  | 26.78495101 | 33.87637175 | 7.091420734  | 2.87E-10 | 2.07E-09 |
| Mir129-2   | 12  | 8.557877367 | 3.733143843 | -4.824733524 | 2.89E-10 | 2.08E-09 |
| Gpc4       | 41  | 36.46533693 | 31.38519501 | -5.080141927 | 2.93E-10 | 2.10E-09 |
| 30026F06F  | 2   | 95.49595142 | 71.57394844 | -23.92200298 | 3.09E-10 | 2.21E-09 |
| Klhdc7b    | 11  | 56.57299057 | 46.33018574 | -10.24280483 | 3.09E-10 | 2.22E-09 |
| Dync1i1    | 12  | 42.59433854 | 31.20080898 | -11.39352956 | 3.16E-10 | 2.27E-09 |
| Nxph1      | 19  | 35.98886807 | 41.42195236 | 5.433084294  | 3.19E-10 | 2.28E-09 |
| Hivep3     | 7   | 7.862984238 | 16.81997786 | 8.956993621  | 3.20E-10 | 2.29E-09 |
| '00024P16F | 13  | 26.60399192 | 20.34153915 | -6.262452771 | 3.23E-10 | 2.31E-09 |
| Slc35c2    | 40  | 5.92107216  | 3.048597878 | -2.872474283 | 3.30E-10 | 2.36E-09 |
| '00051A21F | 10  | 22.97054047 | 36.70614035 | 13.73559988  | 3.35E-10 | 2.40E-09 |
| Aif1l      | 63  | 2.365171599 | 1.626978497 | -0.738193102 | 3.49E-10 | 2.50E-09 |
| Hsf4       | 52  | 3.161020446 | 1.998843292 | -1.162177154 | 3.54E-10 | 2.53E-09 |
| Acot11     | 7   | 39.13050646 | 48.59322976 | 9.462723303  | 3.60E-10 | 2.57E-09 |
| Preli2     | 8   | 11.99778388 | 7.010143225 | -4.987640653 | 3.84E-10 | 2.74E-09 |
| Krt10      | 8   | 90.42300262 | 94.88947051 | 4.466467884  | 3.92E-10 | 2.79E-09 |
| Esr1       | 9   | 26.57316651 | 19.22249773 | -7.350668776 | 3.96E-10 | 2.83E-09 |
| Ina        | 25  | 31.87387061 | 36.11292377 | 4.239053161  | 4.05E-10 | 2.89E-09 |
| Phf8       | 50  | 21.20235609 | 16.59325006 | -4.609106038 | 4.05E-10 | 2.89E-09 |
| Pcdhga10   | 10  | 69.52423576 | 78.00251945 | 8.47828369   | 4.07E-10 | 2.90E-09 |
| Huwe1      | 23  | 21.43919811 | 15.71667103 | -5.722527082 | 4.10E-10 | 2.91E-09 |
| Enox2      | 19  | 28.36136064 | 21.34918571 | -7.012174922 | 4.14E-10 | 2.95E-09 |
| Lrrn2      | 89  | 17.92085647 | 16.62997467 | -1.290881796 | 4.19E-10 | 2.98E-09 |
| Rtn4rl2    | 50  | 9.627299036 | 6.953172698 | -2.674126338 | 4.22E-10 | 3.00E-09 |
| Slc1a3     | 13  | 10.17453475 | 4.670222253 | -5.504312492 | 4.30E-10 | 3.05E-09 |
| Olfir734   | 2   | 87.98198198 | 59.936967   | -28.04501498 | 4.32E-10 | 3.07E-09 |

|            |     |             |             |              |          |          |
|------------|-----|-------------|-------------|--------------|----------|----------|
| Calhm1     | 11  | 77.09091653 | 66.74857942 | -10.34233712 | 4.40E-10 | 3.12E-09 |
| Adamts15   | 52  | 9.46962042  | 6.709401047 | -2.760219373 | 4.40E-10 | 3.12E-09 |
| Anks1b     | 49  | 5.603679774 | 7.69715621  | 2.093476436  | 4.40E-10 | 3.12E-09 |
| Ube2a      | 54  | 19.80761673 | 16.10266642 | -3.704950309 | 4.45E-10 | 3.15E-09 |
| H1fx       | 68  | 4.302749438 | 7.194451952 | 2.891702513  | 4.45E-10 | 3.15E-09 |
| Chrna4     | 72  | 8.085582927 | 10.51444885 | 2.428865923  | 4.51E-10 | 3.19E-09 |
| Sec16b     | 6   | 48.64257992 | 33.38050393 | -15.26207599 | 4.54E-10 | 3.21E-09 |
| Jag2       | 123 | 4.515606218 | 2.722531098 | -1.793075121 | 4.55E-10 | 3.22E-09 |
| BB283400   | 35  | 15.17848481 | 20.91131165 | 5.732826839  | 4.61E-10 | 3.26E-09 |
| Rps6ka3    | 52  | 21.10262543 | 17.57506612 | -3.527559307 | 4.66E-10 | 3.29E-09 |
| Col24a1    | 3   | 34.10858332 | 45.11206515 | 11.00348182  | 4.99E-10 | 3.52E-09 |
| Evp1       | 25  | 16.49340388 | 12.69157548 | -3.801828396 | 5.03E-10 | 3.55E-09 |
| Mcoln2     | 42  | 11.09983241 | 13.97903751 | 2.879205096  | 5.06E-10 | 3.57E-09 |
| Acsn3      | 3   | 52.88914344 | 30.18994415 | -22.69919929 | 5.09E-10 | 3.59E-09 |
| l30430B14F | 5   | 58.38125591 | 44.80565329 | -13.57560262 | 5.11E-10 | 3.60E-09 |
| Enpp6      | 1   | 61.23595506 | 31.02040816 | -30.21554689 | 5.17E-10 | 3.64E-09 |
| Lypd2      | 2   | 83.96890041 | 64.0625     | -19.90640041 | 5.26E-10 | 3.70E-09 |
| Ercc6l     | 20  | 20.43964697 | 13.47710287 | -6.962544105 | 5.29E-10 | 3.72E-09 |
| Ube2u      | 8   | 30.92904573 | 19.6443954  | -11.28465033 | 5.38E-10 | 3.79E-09 |
| Vav1       | 2   | 18.79330508 | 4.839109935 | -13.95419515 | 5.42E-10 | 3.81E-09 |
| Slitrk4    | 34  | 48.76640405 | 55.13497742 | 6.368573376  | 5.48E-10 | 3.85E-09 |
| Tnp1       | 2   | 71.5743252  | 44.41113719 | -27.16318801 | 5.56E-10 | 3.90E-09 |
| Vwce       | 9   | 14.82122049 | 20.9388445  | 6.117624012  | 5.56E-10 | 3.91E-09 |
| l30179D12F | 7   | 5.135630487 | 0.924036281 | -4.211594206 | 5.57E-10 | 3.91E-09 |
| Cdh2       | 101 | 20.22240551 | 22.40121125 | 2.178805737  | 5.65E-10 | 3.96E-09 |
| Mir6910    | 7   | 89.04815531 | 81.68806127 | -7.360094047 | 5.73E-10 | 4.01E-09 |
| Nudt7      | 5   | 7.512600469 | 2.254956629 | -5.25764384  | 5.84E-10 | 4.09E-09 |
| Slc16a9    | 30  | 6.808839403 | 4.342647033 | -2.46619237  | 5.86E-10 | 4.10E-09 |
| '00123K08F | 2   | 62.17818428 | 38.46486888 | -23.71331541 | 6.01E-10 | 4.21E-09 |
| Dppa2      | 3   | 93.26843354 | 82.01903354 | -11.2494     | 6.41E-10 | 4.48E-09 |
| Dmgdh      | 15  | 66.35526116 | 72.26967177 | 5.914410612  | 6.48E-10 | 4.54E-09 |
| Plxnc1     | 142 | 10.45221662 | 8.788820815 | -1.663395806 | 6.50E-10 | 4.54E-09 |
| Igfbp1b    | 15  | 87.54172973 | 80.13836173 | -7.403368004 | 6.69E-10 | 4.68E-09 |
| Baiap3     | 10  | 6.137678563 | 13.45759057 | 7.319912003  | 7.17E-10 | 5.01E-09 |

|            |     |             |             |              |          |          |
|------------|-----|-------------|-------------|--------------|----------|----------|
| Hand2      | 9   | 66.22719519 | 52.42243025 | -13.80476493 | 7.38E-10 | 5.15E-09 |
| Cdhr5      | 6   | 57.14818505 | 44.67707945 | -12.4711056  | 7.41E-10 | 5.17E-09 |
| Kcnd3os    | 43  | 29.64046552 | 27.16026289 | -2.480202632 | 7.43E-10 | 5.18E-09 |
| Zfp804b    | 8   | 15.04459734 | 11.87296292 | -3.171634417 | 7.84E-10 | 5.47E-09 |
| !30402G23F | 5   | 46.33474119 | 35.03587832 | -11.29886287 | 7.86E-10 | 5.48E-09 |
| Cacna1a    | 88  | 7.939243717 | 7.392073452 | -0.547170265 | 8.08E-10 | 5.62E-09 |
| Cables1    | 13  | 9.589923013 | 4.191615583 | -5.398307429 | 8.18E-10 | 5.69E-09 |
| !21504A21F | 30  | 25.59658846 | 30.73676354 | 5.140175076  | 8.26E-10 | 5.75E-09 |
| Sprn       | 11  | 50.88258171 | 39.65565602 | -11.22692569 | 8.27E-10 | 5.75E-09 |
| Jph3       | 147 | 9.338005233 | 11.57605656 | 2.238051327  | 8.45E-10 | 5.87E-09 |
| Gzmm       | 1   | 90.49180328 | 72.56857855 | -17.92322473 | 8.58E-10 | 5.96E-09 |
| Jade3      | 102 | 18.28396916 | 15.54210412 | -2.741865035 | 8.79E-10 | 6.10E-09 |
| Drd5       | 43  | 26.50292431 | 29.28053776 | 2.777613454  | 8.94E-10 | 6.20E-09 |
| B3galt5    | 6   | 11.91669632 | 8.786509003 | -3.130187313 | 9.18E-10 | 6.37E-09 |
| Tcf21      | 1   | 45.52238806 | 13.66459627 | -31.85779179 | 9.21E-10 | 6.39E-09 |
| Cpne7      | 70  | 17.39100853 | 19.08181334 | 1.690804816  | 9.51E-10 | 6.59E-09 |
| Cfap45     | 4   | 31.26137848 | 44.05383388 | 12.7924554   | 9.53E-10 | 6.60E-09 |
| Mir7218    | 1   | 67.0212766  | 34.9112426  | -32.11003399 | 9.68E-10 | 6.70E-09 |
| Tnfsf14    | 7   | 47.89900407 | 35.50685932 | -12.39214475 | 9.71E-10 | 6.72E-09 |
| Fam83e     | 4   | 45.21224813 | 31.69213721 | -13.52011092 | 1.00E-09 | 6.95E-09 |
| !30102O04F | 8   | 31.56134004 | 45.89865752 | 14.33731748  | 1.01E-09 | 6.99E-09 |
| Lrfn1      | 87  | 4.704811381 | 4.198895353 | -0.505916028 | 1.04E-09 | 7.21E-09 |
| Nkx1-2     | 14  | 23.74629592 | 20.45191169 | -3.29438423  | 1.06E-09 | 7.32E-09 |
| Oprm1      | 6   | 35.48882345 | 24.05121044 | -11.43761301 | 1.07E-09 | 7.36E-09 |
| 4-Sep      | 22  | 7.646033243 | 4.405400682 | -3.240632561 | 1.08E-09 | 7.46E-09 |
| Ndst3      | 46  | 60.57243485 | 63.64113143 | 3.068696575  | 1.09E-09 | 7.49E-09 |
| Ap1s2      | 67  | 25.07264916 | 22.46160703 | -2.611042131 | 1.09E-09 | 7.53E-09 |
| Il10ra     | 6   | 11.71171171 | 2.31884058  | -9.392871132 | 1.11E-09 | 7.64E-09 |
| !10007B03F | 4   | 46.81672595 | 34.20941208 | -12.60731387 | 1.13E-09 | 7.75E-09 |
| Grhl2      | 27  | 12.24202823 | 16.43242829 | 4.190400063  | 1.15E-09 | 7.95E-09 |
| !30013I19R | 3   | 63.338899   | 48.87897298 | -14.45992601 | 1.18E-09 | 8.10E-09 |
| Cyp1a1     | 2   | 15.53616039 | 5.612980769 | -9.92317962  | 1.18E-09 | 8.12E-09 |
| Mir6917    | 9   | 73.38002981 | 62.69960074 | -10.68042907 | 1.21E-09 | 8.29E-09 |
| Nsg2       | 12  | 10.08734077 | 15.78509944 | 5.697758674  | 1.22E-09 | 8.37E-09 |

|            |     |             |             |              |          |          |
|------------|-----|-------------|-------------|--------------|----------|----------|
| Al427809   | 3   | 88.97291405 | 77.58839601 | -11.38451804 | 1.22E-09 | 8.39E-09 |
| Nespas     | 4   | 11.8852459  | 0.912910619 | -10.97233528 | 1.23E-09 | 8.46E-09 |
| Hesx1      | 7   | 71.30253871 | 58.13843826 | -13.16410045 | 1.25E-09 | 8.61E-09 |
| Zcchc14    | 195 | 3.259385887 | 2.626450617 | -0.63293527  | 1.27E-09 | 8.73E-09 |
| Robo4      | 1   | 57.14285714 | 26.34146341 | -30.80139373 | 1.28E-09 | 8.77E-09 |
| Mir6354    | 1   | 98.41269841 | 61.76470588 | -36.64799253 | 1.31E-09 | 8.97E-09 |
| Uggt2      | 41  | 34.05853613 | 30.55920772 | -3.499328414 | 1.31E-09 | 8.98E-09 |
| Snx19      | 33  | 3.407753499 | 1.998947424 | -1.408806075 | 1.31E-09 | 9.00E-09 |
| Eya4       | 43  | 37.44072436 | 41.57619263 | 4.135468266  | 1.33E-09 | 9.08E-09 |
| Iqsec2     | 48  | 14.17342192 | 10.17288146 | -4.000540461 | 1.36E-09 | 9.28E-09 |
| Rn45s      | 55  | 41.30523533 | 41.23908707 | -0.066148257 | 1.37E-09 | 9.36E-09 |
| Dhtkd1     | 13  | 7.605363308 | 3.580224769 | -4.025138539 | 1.41E-09 | 9.66E-09 |
| '30006G06F | 10  | 88.67787514 | 78.74321055 | -9.934664591 | 1.43E-09 | 9.77E-09 |
| Cpb1       | 4   | 84.25688678 | 68.47325785 | -15.78362894 | 1.45E-09 | 9.89E-09 |
| '00016K19F | 4   | 19.30954952 | 12.31629719 | -6.993252337 | 1.45E-09 | 9.89E-09 |
| I33404K13F | 6   | 96.68126471 | 91.36220841 | -5.3190563   | 1.45E-09 | 9.89E-09 |
| Cd34       | 17  | 28.92998839 | 34.42458567 | 5.494597275  | 1.54E-09 | 1.05E-08 |
| Jph2       | 2   | 60.74113856 | 39.64711988 | -21.09401869 | 1.56E-09 | 1.07E-08 |
| Azin2      | 53  | 5.452963929 | 2.786160129 | -2.6668038   | 1.62E-09 | 1.10E-08 |
| Celsr1     | 100 | 6.465611181 | 5.394949019 | -1.070662161 | 1.69E-09 | 1.15E-08 |
| Mgarp      | 14  | 20.67991951 | 26.24911159 | 5.569192079  | 1.71E-09 | 1.16E-08 |
| Slc25a34   | 5   | 86.35989509 | 76.88713195 | -9.472763139 | 1.75E-09 | 1.19E-08 |
| Rhof       | 27  | 10.53245325 | 5.755499348 | -4.776953907 | 1.79E-09 | 1.22E-08 |
| Nog        | 112 | 13.22290489 | 16.93954339 | 3.716638496  | 1.80E-09 | 1.22E-08 |
| Eln        | 10  | 4.857425516 | 2.372395964 | -2.485029552 | 1.82E-09 | 1.24E-08 |
| Eno2       | 25  | 12.91130293 | 18.33280435 | 5.42150142   | 1.85E-09 | 1.26E-08 |
| Gpr179     | 11  | 93.34599238 | 88.96226168 | -4.383730695 | 1.88E-09 | 1.27E-08 |
| Trpm6      | 29  | 62.36360984 | 68.39347316 | 6.029863321  | 1.92E-09 | 1.30E-08 |
| Ltbp3      | 2   | 40.87878788 | 23.04421769 | -17.83457019 | 1.95E-09 | 1.32E-08 |
| Prkx       | 32  | 22.14015912 | 17.21104467 | -4.929114454 | 1.96E-09 | 1.33E-08 |
| Mlph       | 15  | 6.039240082 | 3.702506948 | -2.336733134 | 1.97E-09 | 1.33E-08 |
| Klhl14     | 15  | 28.49596143 | 23.30342118 | -5.192540248 | 1.97E-09 | 1.33E-08 |
| Gria4      | 12  | 34.6042325  | 25.30937722 | -9.294855275 | 1.98E-09 | 1.34E-08 |
| Mir6901    | 2   | 93.16239316 | 78.40899796 | -14.75339521 | 2.09E-09 | 1.42E-08 |



|            |     |             |             |              |          |          |
|------------|-----|-------------|-------------|--------------|----------|----------|
| Fam83a     | 7   | 66.12489895 | 56.74910146 | -9.375797491 | 2.10E-09 | 1.42E-08 |
| Tomm20l    | 5   | 39.83349983 | 22.82513661 | -17.00836322 | 2.18E-09 | 1.48E-08 |
| l33438B17F | 3   | 86.12136995 | 67.74082826 | -18.38054169 | 2.20E-09 | 1.49E-08 |
| Ubqln2     | 53  | 16.69120266 | 12.39062346 | -4.300579197 | 2.28E-09 | 1.54E-08 |
| Wbscr25    | 10  | 23.60330762 | 30.9797152  | 7.376407585  | 2.31E-09 | 1.56E-08 |
| 430010I23R | 8   | 18.52685092 | 12.03101773 | -6.495833191 | 2.40E-09 | 1.62E-08 |
| Ssh3       | 21  | 6.424589089 | 3.426750714 | -2.997838375 | 2.42E-09 | 1.63E-08 |
| Zfp462     | 15  | 9.809605001 | 3.937330398 | -5.872274604 | 2.47E-09 | 1.67E-08 |
| Armcx2     | 5   | 30.9862056  | 18.5464689  | -12.4397367  | 2.53E-09 | 1.70E-08 |
| Dlg4       | 10  | 17.76672119 | 13.05495003 | -4.711771158 | 2.56E-09 | 1.72E-08 |
| Mir6926    | 14  | 91.64411919 | 85.34361806 | -6.300501127 | 2.64E-09 | 1.77E-08 |
| l33431E20F | 24  | 6.468166567 | 10.84463834 | 4.376471774  | 2.64E-09 | 1.78E-08 |
| Wfdc1      | 5   | 14.70230678 | 7.092999947 | -7.609306837 | 2.72E-09 | 1.83E-08 |
| l21509C19F | 3   | 57.20419412 | 42.86807155 | -14.33612256 | 2.73E-09 | 1.83E-08 |
| Slc7a14    | 24  | 45.6919252  | 42.60003929 | -3.091885914 | 2.78E-09 | 1.87E-08 |
| Kdm5c      | 26  | 2.530213933 | 1.119260534 | -1.410953399 | 2.81E-09 | 1.88E-08 |
| Rbmx2      | 25  | 23.73416995 | 18.10176888 | -5.632401073 | 2.87E-09 | 1.93E-08 |
| Rltpr      | 6   | 80.18252372 | 69.06516122 | -11.1173625  | 2.89E-09 | 1.94E-08 |
| Fermt2     | 110 | 2.446066556 | 1.651471843 | -0.794594713 | 2.94E-09 | 1.97E-08 |
| Sp7        | 4   | 45.00698374 | 31.28062626 | -13.72635748 | 2.95E-09 | 1.97E-08 |
| Map3k15    | 62  | 39.43259284 | 44.32314105 | 4.890548212  | 2.95E-09 | 1.98E-08 |
| Jph4       | 2   | 24.29054471 | 40.13413003 | 15.84358531  | 2.99E-09 | 2.00E-08 |
| Gm12830    | 8   | 25.63784842 | 17.39943769 | -8.238410732 | 3.03E-09 | 2.03E-08 |
| ltga7      | 23  | 6.64545573  | 11.64592722 | 5.000471493  | 3.03E-09 | 2.03E-08 |
| Gm19668    | 6   | 66.73874985 | 58.35303038 | -8.385719466 | 3.04E-09 | 2.03E-08 |
| Hoxd10     | 36  | 57.97464443 | 52.42185742 | -5.552787011 | 3.06E-09 | 2.05E-08 |
| Nxph4      | 54  | 3.255782837 | 1.871447386 | -1.384335451 | 3.06E-09 | 2.05E-08 |
| Gm10857    | 9   | 94.08093094 | 83.64522401 | -10.43570693 | 3.13E-09 | 2.09E-08 |
| Gramd1b    | 31  | 15.92445973 | 12.82519798 | -3.099261753 | 3.15E-09 | 2.10E-08 |
| Clec14a    | 4   | 57.68706309 | 45.10273953 | -12.58432355 | 3.15E-09 | 2.10E-08 |
| Chn1       | 96  | 4.071883525 | 2.95447512  | -1.117408405 | 3.21E-09 | 2.14E-08 |
| Cbr1       | 7   | 2.874751241 | 6.451537892 | 3.576786651  | 3.21E-09 | 2.14E-08 |
| Megf10     | 17  | 18.02184653 | 14.78637486 | -3.235471665 | 3.23E-09 | 2.15E-08 |
| Gm15455    | 12  | 90.38965736 | 81.7746026  | -8.615054758 | 3.23E-09 | 2.15E-08 |

|            |     |             |             |              |          |          |
|------------|-----|-------------|-------------|--------------|----------|----------|
| Rps4x      | 14  | 19.5990883  | 12.56720491 | -7.031883398 | 3.27E-09 | 2.17E-08 |
| Adad1      | 27  | 83.22667147 | 79.99608988 | -3.230581594 | 3.28E-09 | 2.18E-08 |
| Gpr83      | 45  | 27.67534662 | 25.95160011 | -1.723746514 | 3.34E-09 | 2.22E-08 |
| Dkk2       | 9   | 15.46501456 | 11.81854673 | -3.646467834 | 3.35E-09 | 2.23E-08 |
| Hebp1      | 27  | 3.930974876 | 2.262975847 | -1.667999029 | 3.46E-09 | 2.30E-08 |
| Sall4      | 50  | 25.61120405 | 22.82579115 | -2.785412904 | 3.49E-09 | 2.32E-08 |
| Slc6a8     | 57  | 16.35113803 | 13.48851476 | -2.862623273 | 3.51E-09 | 2.33E-08 |
| 130594O21F | 9   | 82.92168396 | 76.83996196 | -6.081721993 | 3.54E-09 | 2.35E-08 |
| C1ql2      | 38  | 35.94536714 | 32.33026662 | -3.615100525 | 3.58E-09 | 2.37E-08 |
| Cct8l1     | 8   | 95.56130347 | 88.56170245 | -6.999601024 | 3.58E-09 | 2.38E-08 |
| Adgrb3     | 74  | 51.39255933 | 53.46168225 | 2.069122923  | 3.60E-09 | 2.38E-08 |
| Spats2l    | 66  | 2.732080665 | 1.728487252 | -1.003593413 | 3.60E-09 | 2.39E-08 |
| Mir455     | 16  | 95.20590846 | 90.6602871  | -4.54562136  | 3.65E-09 | 2.42E-08 |
| Slc43a1    | 58  | 13.65734523 | 13.16272306 | -0.494622166 | 3.71E-09 | 2.45E-08 |
| Pfn4       | 6   | 25.86623753 | 18.52640415 | -7.339833381 | 3.80E-09 | 2.51E-08 |
| Spanxn4    | 3   | 87.12121212 | 62.3546362  | -24.76657592 | 3.84E-09 | 2.54E-08 |
| Mvb12b     | 35  | 2.762038946 | 1.376084614 | -1.385954332 | 3.90E-09 | 2.58E-08 |
| Nox4       | 39  | 45.18620036 | 42.08748936 | -3.098710992 | 3.91E-09 | 2.58E-08 |
| Pcdhga1    | 10  | 59.67068707 | 51.72621297 | -7.944474106 | 4.04E-09 | 2.67E-08 |
| 130426P16F | 30  | 3.55282816  | 2.092721669 | -1.460106491 | 4.10E-09 | 2.71E-08 |
| Scarf1     | 3   | 65.07899098 | 47.37212193 | -17.70686905 | 4.24E-09 | 2.80E-08 |
| Igfbp7     | 94  | 2.477205347 | 1.640022082 | -0.837183265 | 4.37E-09 | 2.88E-08 |
| Hmx1       | 135 | 58.05771522 | 60.47531253 | 2.417597308  | 4.38E-09 | 2.88E-08 |
| Slc13a3    | 21  | 24.71526915 | 21.77803773 | -2.937231413 | 4.50E-09 | 2.96E-08 |
| Elavl4     | 45  | 45.87021952 | 49.44633223 | 3.576112714  | 4.52E-09 | 2.97E-08 |
| Slc2a5     | 2   | 98.66666667 | 75.02560164 | -23.64106503 | 4.55E-09 | 3.00E-08 |
| Lamp2      | 25  | 19.85864907 | 12.44309388 | -7.415555192 | 4.58E-09 | 3.01E-08 |
| Dll4       | 13  | 4.246294708 | 1.410803434 | -2.835491274 | 4.60E-09 | 3.02E-08 |
| Kcnd2      | 21  | 36.49734195 | 33.30737916 | -3.189962787 | 4.66E-09 | 3.06E-08 |
| Cldn17     | 5   | 97.9770807  | 92.34593234 | -5.631148363 | 4.81E-09 | 3.16E-08 |
| Maf        | 84  | 2.443274532 | 1.57423356  | -0.869040972 | 4.82E-09 | 3.17E-08 |
| Lrrc2      | 3   | 90.31080031 | 75.41708375 | -14.89371656 | 4.83E-09 | 3.17E-08 |
| Arc        | 36  | 9.240734107 | 7.266417672 | -1.974316435 | 5.03E-09 | 3.30E-08 |
| Naaladl1   | 3   | 72.6570176  | 59.84471581 | -12.81230179 | 5.15E-09 | 3.38E-08 |

|            |     |             |             |              |          |          |
|------------|-----|-------------|-------------|--------------|----------|----------|
| Nsg1       | 78  | 36.48091583 | 34.95398333 | -1.526932494 | 5.16E-09 | 3.38E-08 |
| Nrip2      | 4   | 54.29066394 | 40.43685518 | -13.85380876 | 5.32E-09 | 3.49E-08 |
| Prss39     | 3   | 78.87238932 | 67.41023311 | -11.46215621 | 5.41E-09 | 3.55E-08 |
| Gm16157    | 12  | 37.21882572 | 28.78902084 | -8.429804883 | 5.44E-09 | 3.56E-08 |
| Adgra3     | 99  | 2.71533495  | 1.913444938 | -0.801890012 | 5.65E-09 | 3.69E-08 |
| Celf3      | 4   | 25.47176742 | 40.80737302 | 15.3356056   | 5.69E-09 | 3.72E-08 |
| Prps2      | 31  | 22.63759436 | 17.99564447 | -4.641949898 | 5.70E-09 | 3.73E-08 |
| Nme8       | 5   | 81.58628609 | 66.6308184  | -14.95546769 | 5.75E-09 | 3.76E-08 |
| .30060K24F | 16  | 23.69840583 | 19.25958438 | -4.438821449 | 5.83E-09 | 3.81E-08 |
| P2rx6      | 7   | 6.507785822 | 2.137878629 | -4.369907193 | 6.13E-09 | 4.00E-08 |
| Atp11c     | 136 | 16.79066031 | 14.52944636 | -2.261213957 | 6.21E-09 | 4.05E-08 |
| Trappc2    | 34  | 16.71683537 | 12.74815206 | -3.968683309 | 6.22E-09 | 4.06E-08 |
| Nptx1      | 58  | 2.618680192 | 1.079924797 | -1.538755394 | 6.27E-09 | 4.09E-08 |
| 700021F07F | 3   | 87.80063291 | 69.99228841 | -17.8083445  | 6.29E-09 | 4.10E-08 |
| Sntg2      | 27  | 39.57965096 | 45.59156775 | 6.011916794  | 6.29E-09 | 4.10E-08 |
| Aqp4       | 6   | 85.7494362  | 71.71333783 | -14.03609837 | 6.33E-09 | 4.12E-08 |
| Prss42     | 15  | 90.75893584 | 82.37815533 | -8.380780506 | 6.37E-09 | 4.15E-08 |
| 30545E07F  | 1   | 91.17647059 | 48          | -43.17647059 | 6.49E-09 | 4.23E-08 |
| Fbxl22     | 4   | 69.96747171 | 81.37337921 | 11.4059075   | 6.62E-09 | 4.30E-08 |
| Rag1       | 1   | 69.71608833 | 46.03773585 | -23.67835248 | 6.65E-09 | 4.32E-08 |
| Rhox6      | 3   | 94.94636964 | 84.96541054 | -9.9809591   | 6.79E-09 | 4.41E-08 |
| Grid2      | 62  | 37.27340977 | 39.62481926 | 2.351409484  | 6.83E-09 | 4.43E-08 |
| Fam151b    | 6   | 8.556196619 | 4.286506385 | -4.269690234 | 6.84E-09 | 4.44E-08 |
| Hmgb3      | 11  | 28.060385   | 19.17219509 | -8.888189913 | 6.85E-09 | 4.44E-08 |
| Pla2g3     | 9   | 51.60732286 | 44.33521848 | -7.272104379 | 6.85E-09 | 4.45E-08 |
| Guca1b     | 3   | 98.39845827 | 88.84433226 | -9.554126012 | 7.07E-09 | 4.58E-08 |
| Mylip      | 62  | 17.14087397 | 15.62467544 | -1.516198539 | 7.07E-09 | 4.58E-08 |
| Sycp1      | 38  | 91.12959716 | 87.67547149 | -3.454125661 | 7.19E-09 | 4.66E-08 |
| Mertk      | 37  | 5.172587182 | 6.464537294 | 1.291950112  | 7.22E-09 | 4.67E-08 |
| Ak8        | 30  | 7.988519149 | 5.653590578 | -2.334928571 | 7.39E-09 | 4.78E-08 |
| Has3       | 22  | 30.63750863 | 27.00767155 | -3.629837076 | 7.40E-09 | 4.79E-08 |
| Fxyd6      | 15  | 7.64296843  | 12.04846404 | 4.405495613  | 7.61E-09 | 4.92E-08 |
| Fmnl1      | 113 | 1.909669745 | 1.466994703 | -0.442675042 | 7.62E-09 | 4.93E-08 |
| Irak1bp1   | 41  | 2.125438289 | 1.135656657 | -0.989781632 | 8.75E-09 | 5.65E-08 |

|            |    |             |             |              |          |          |
|------------|----|-------------|-------------|--------------|----------|----------|
| Acat3      | 5  | 8.161459954 | 4.154331389 | -4.007128566 | 8.79E-09 | 5.68E-08 |
| Phldb3     | 36 | 3.721140525 | 2.324510672 | -1.396629853 | 8.81E-09 | 5.68E-08 |
| Bcat1      | 21 | 21.46881743 | 17.83928695 | -3.629530478 | 8.86E-09 | 5.72E-08 |
| Bend5      | 49 | 45.58339669 | 49.11592976 | 3.532533072  | 8.92E-09 | 5.76E-08 |
| Dazl       | 37 | 94.57135309 | 90.88894358 | -3.682409513 | 8.99E-09 | 5.80E-08 |
| Tmtc1      | 66 | 16.32394343 | 15.06990409 | -1.254039348 | 9.12E-09 | 5.88E-08 |
| Pcp4l1     | 38 | 15.30232773 | 11.2928095  | -4.00951824  | 9.24E-09 | 5.96E-08 |
| B3gnt8     | 14 | 10.42672894 | 15.71595084 | 5.289221898  | 9.26E-09 | 5.96E-08 |
| Dapp1      | 9  | 96.95557547 | 94.1771719  | -2.778403566 | 9.26E-09 | 5.96E-08 |
| Epcam      | 3  | 5.04290285  | 16.49484536 | 11.45194251  | 9.39E-09 | 6.04E-08 |
| Syt16      | 29 | 21.55377857 | 18.31791245 | -3.23586612  | 9.49E-09 | 6.10E-08 |
| Arhgap42   | 39 | 24.05278999 | 28.88727023 | 4.834480243  | 9.51E-09 | 6.11E-08 |
| B3gnt7     | 47 | 6.994183677 | 6.464035339 | -0.530148338 | 9.60E-09 | 6.17E-08 |
| Zfp180     | 11 | 44.36667955 | 37.78791268 | -6.578766869 | 9.65E-09 | 6.20E-08 |
| Saa2       | 1  | 66.31578947 | 26          | -40.31578947 | 1.00E-08 | 6.43E-08 |
| I30003O13F | 10 | 33.13796037 | 27.11199691 | -6.025963467 | 1.01E-08 | 6.49E-08 |
| Igdcc3     | 50 | 13.28163643 | 17.80275508 | 4.521118652  | 1.01E-08 | 6.50E-08 |
| I30433N12F | 14 | 60.6070128  | 66.94355486 | 6.336542068  | 1.02E-08 | 6.56E-08 |
| Ptf1a      | 29 | 29.26206173 | 25.43387852 | -3.828183213 | 1.04E-08 | 6.68E-08 |
| Mir124a-2  | 13 | 41.34660347 | 37.38931405 | -3.95728942  | 1.06E-08 | 6.77E-08 |
| Sstr3      | 8  | 36.55417286 | 27.64032509 | -8.91384777  | 1.07E-08 | 6.88E-08 |
| Lhx4       | 82 | 8.23433166  | 6.800501817 | -1.433829842 | 1.08E-08 | 6.92E-08 |
| I30460C07F | 1  | 92.11045365 | 79.96219282 | -12.14826083 | 1.10E-08 | 7.04E-08 |
| Ddo        | 4  | 58.82525599 | 40.66456835 | -18.16068764 | 1.10E-08 | 7.05E-08 |
| Foxl2os    | 48 | 9.674670699 | 12.93299122 | 3.25832052   | 1.11E-08 | 7.12E-08 |
| Sowahd     | 57 | 28.60241528 | 26.14264992 | -2.459765361 | 1.15E-08 | 7.35E-08 |
| Dsg2       | 29 | 2.794915507 | 1.640263581 | -1.154651927 | 1.16E-08 | 7.40E-08 |
| Rab39      | 2  | 23.05341055 | 44.41176471 | 21.35835415  | 1.17E-08 | 7.49E-08 |
| Stk32c     | 82 | 13.65779837 | 12.82581848 | -0.831979892 | 1.18E-08 | 7.50E-08 |
| Mir184     | 1  | 44.81481481 | 23.00884956 | -21.80596526 | 1.18E-08 | 7.53E-08 |
| Ntn1       | 84 | 12.8842356  | 11.25976654 | -1.624469062 | 1.20E-08 | 7.62E-08 |
| Cnr1       | 92 | 40.1953381  | 44.28672879 | 4.091390694  | 1.20E-08 | 7.63E-08 |
| I30114P18F | 6  | 92.4521442  | 85.58892449 | -6.86321971  | 1.22E-08 | 7.74E-08 |
| I10001E11F | 27 | 29.76053354 | 25.11757602 | -4.64295752  | 1.22E-08 | 7.78E-08 |

|            |     |             |             |              |          |          |
|------------|-----|-------------|-------------|--------------|----------|----------|
| Alx3       | 56  | 55.36099426 | 58.02949557 | 2.668501303  | 1.24E-08 | 7.91E-08 |
| Rell2      | 18  | 4.926802403 | 12.6061697  | 7.679367297  | 1.26E-08 | 8.04E-08 |
| Tcerg1l    | 107 | 45.31748252 | 47.6103159  | 2.292833382  | 1.27E-08 | 8.09E-08 |
| Mir615     | 43  | 31.05929855 | 34.69918495 | 3.639886393  | 1.28E-08 | 8.13E-08 |
| Agbl4      | 10  | 52.91138243 | 47.25029868 | -5.66108375  | 1.28E-08 | 8.15E-08 |
| Wnt8a      | 2   | 85.90909091 | 62.5        | -23.40909091 | 1.30E-08 | 8.25E-08 |
| Csta1      | 2   | 70.90746055 | 51.93749738 | -18.96996316 | 1.35E-08 | 8.55E-08 |
| Stard8     | 3   | 36.06557377 | 10.9800363  | -25.08553747 | 1.35E-08 | 8.56E-08 |
| Cd48       | 2   | 45.41284404 | 24.98436034 | -20.4284837  | 1.35E-08 | 8.57E-08 |
| Tnxb       | 5   | 86.56915213 | 77.61719224 | -8.951959894 | 1.36E-08 | 8.61E-08 |
| Neb        | 7   | 93.92661505 | 85.84646252 | -8.080152522 | 1.36E-08 | 8.64E-08 |
| Dbn1       | 94  | 2.644809135 | 1.991225169 | -0.653583967 | 1.37E-08 | 8.66E-08 |
| Pacsin3    | 44  | 19.90998501 | 23.41866086 | 3.508675847  | 1.37E-08 | 8.69E-08 |
| Osbp2      | 27  | 15.08951107 | 13.27235082 | -1.817160249 | 1.37E-08 | 8.69E-08 |
| Trpv6      | 3   | 51.19892743 | 32.07334288 | -19.12558456 | 1.37E-08 | 8.69E-08 |
| Mdfi       | 33  | 4.357659263 | 2.822007295 | -1.535651969 | 1.42E-08 | 8.98E-08 |
| Ascl2      | 37  | 16.91533406 | 14.80557736 | -2.109756698 | 1.44E-08 | 9.13E-08 |
| 30011005F  | 10  | 38.54444008 | 29.49669219 | -9.047747897 | 1.46E-08 | 9.19E-08 |
| Sat2       | 6   | 7.566940221 | 3.283746687 | -4.283193535 | 1.47E-08 | 9.27E-08 |
| Dcst1      | 6   | 91.77836936 | 83.27085831 | -8.507511045 | 1.49E-08 | 9.42E-08 |
| Edar       | 5   | 11.72070107 | 5.769450311 | -5.951250759 | 1.52E-08 | 9.59E-08 |
| Prdm6      | 114 | 10.99027293 | 13.52080367 | 2.530530744  | 1.55E-08 | 9.77E-08 |
| Gatm       | 15  | 51.51813718 | 48.00393799 | -3.51419919  | 1.56E-08 | 9.82E-08 |
| Pcdhga11   | 12  | 66.93952859 | 75.54622577 | 8.606697177  | 1.58E-08 | 9.97E-08 |
| 110039108R | 8   | 30.00277835 | 38.59918396 | 8.596405612  | 1.64E-08 | 1.03E-07 |
| Mir181c    | 1   | 91.02040816 | 72.10144928 | -18.91895889 | 1.64E-08 | 1.03E-07 |
| Gdf2       | 5   | 64.85916333 | 53.69085846 | -11.16830487 | 1.64E-08 | 1.03E-07 |
| Pop5       | 42  | 8.248754319 | 5.950578281 | -2.298176037 | 1.64E-08 | 1.03E-07 |
| Crabp1     | 13  | 37.23249319 | 31.44133687 | -5.791156315 | 1.64E-08 | 1.03E-07 |
| Mir5130    | 67  | 29.41319882 | 27.26789342 | -2.145305397 | 1.66E-08 | 1.04E-07 |
| Rfx6       | 10  | 17.96288538 | 27.4828236  | 9.519938211  | 1.66E-08 | 1.04E-07 |
| Mir7027    | 4   | 97.523785   | 83.79147813 | -13.73230687 | 1.67E-08 | 1.05E-07 |
| Bhlhe22    | 23  | 54.98028211 | 59.47034651 | 4.490064401  | 1.68E-08 | 1.05E-07 |
| B4galnt3   | 45  | 4.866982437 | 3.643557215 | -1.223425222 | 1.72E-08 | 1.08E-07 |

|            |     |             |             |              |          |          |
|------------|-----|-------------|-------------|--------------|----------|----------|
| Dnajib3    | 20  | 43.74984426 | 51.07060586 | 7.320761597  | 1.74E-08 | 1.09E-07 |
| Ogdhl      | 11  | 14.1259184  | 22.31414249 | 8.188224099  | 1.74E-08 | 1.09E-07 |
| Coq4       | 12  | 4.221774246 | 1.472858306 | -2.74891594  | 1.78E-08 | 1.12E-07 |
| Synpo2     | 4   | 18.17258115 | 9.333011848 | -8.839569298 | 1.80E-08 | 1.13E-07 |
| Pabpc4l    | 28  | 17.43647531 | 20.70113713 | 3.264661822  | 1.83E-08 | 1.15E-07 |
| Kit        | 12  | 21.77188928 | 16.53054731 | -5.241341967 | 1.86E-08 | 1.16E-07 |
| !10011C24F | 56  | 9.460019412 | 9.220035381 | -0.23998403  | 1.87E-08 | 1.17E-07 |
| Fgb        | 5   | 82.08223972 | 69.04695755 | -13.03528217 | 1.90E-08 | 1.19E-07 |
| Tbx21      | 13  | 9.285367118 | 13.16762674 | 3.882259626  | 2.06E-08 | 1.28E-07 |
| Pkp1       | 28  | 6.068291834 | 3.101227024 | -2.96706481  | 2.10E-08 | 1.31E-07 |
| Ramp2      | 53  | 8.181901803 | 5.999618055 | -2.182283748 | 2.12E-08 | 1.33E-07 |
| Snrpn      | 9   | 54.95332923 | 42.83094176 | -12.12238747 | 2.14E-08 | 1.33E-07 |
| Snurf      | 9   | 54.95332923 | 42.83094176 | -12.12238747 | 2.14E-08 | 1.33E-07 |
| Pirt       | 6   | 66.00057817 | 54.65280385 | -11.34777431 | 2.15E-08 | 1.34E-07 |
| Vax2os     | 21  | 21.46459006 | 27.62897699 | 6.164386928  | 2.17E-08 | 1.35E-07 |
| Cyp4f40    | 3   | 61.03529087 | 42.90463933 | -18.13065154 | 2.17E-08 | 1.35E-07 |
| Tst        | 46  | 4.50350881  | 2.388079305 | -2.115429505 | 2.18E-08 | 1.36E-07 |
| Ebf2       | 20  | 45.08851215 | 50.13942374 | 5.050911588  | 2.22E-08 | 1.38E-07 |
| Dpp6       | 46  | 54.98830411 | 50.71101716 | -4.277286955 | 2.28E-08 | 1.42E-07 |
| Dlk2       | 27  | 3.955253121 | 1.885703333 | -2.069549788 | 2.29E-08 | 1.42E-07 |
| Fibcd1     | 61  | 6.426772653 | 4.946378301 | -1.480394352 | 2.30E-08 | 1.43E-07 |
| Dlx5       | 6   | 24.91099243 | 13.23190951 | -11.67908292 | 2.32E-08 | 1.44E-07 |
| Fam19a4    | 13  | 25.30063371 | 31.96967623 | 6.669042515  | 2.38E-08 | 1.48E-07 |
| Nalcn      | 15  | 40.58083123 | 49.66557911 | 9.084747876  | 2.40E-08 | 1.49E-07 |
| Sox9       | 50  | 3.30514259  | 1.752633868 | -1.552508721 | 2.41E-08 | 1.49E-07 |
| Hoxa5      | 45  | 87.67684978 | 90.44229765 | 2.765447876  | 2.44E-08 | 1.52E-07 |
| Dok7       | 44  | 2.558735883 | 1.479812656 | -1.078923228 | 2.52E-08 | 1.56E-07 |
| Slc9a6     | 25  | 19.10435834 | 13.29453055 | -5.80982779  | 2.55E-08 | 1.58E-07 |
| Fgf16      | 55  | 33.87148482 | 30.5882289  | -3.283255916 | 2.58E-08 | 1.60E-07 |
| Smoc1      | 44  | 30.72664374 | 34.60365576 | 3.877012023  | 2.59E-08 | 1.61E-07 |
| Celsr2     | 74  | 7.25899982  | 5.660946657 | -1.598053163 | 2.63E-08 | 1.63E-07 |
| AU023762   | 3   | 78.52475573 | 65.35062982 | -13.17412592 | 2.73E-08 | 1.69E-07 |
| Ppp2r2c    | 117 | 8.337078403 | 8.574180994 | 0.237102591  | 2.74E-08 | 1.69E-07 |
| Tmem30b    | 91  | 47.59471054 | 49.83481484 | 2.240104298  | 2.74E-08 | 1.70E-07 |

|            |     |             |             |              |          |          |
|------------|-----|-------------|-------------|--------------|----------|----------|
| 430105I19R | 14  | 14.39787833 | 8.742582673 | -5.655295656 | 2.77E-08 | 1.71E-07 |
| Fscn2      | 11  | 90.08664974 | 86.24611774 | -3.840532003 | 2.78E-08 | 1.72E-07 |
| Lrrc30     | 1   | 58.33333333 | 24.54545455 | -33.78787879 | 2.78E-08 | 1.72E-07 |
| Angptl6    | 1   | 98.9010989  | 83.79888268 | -15.10221622 | 2.79E-08 | 1.72E-07 |
| Pdzrn4     | 25  | 50.47862025 | 54.90441472 | 4.425794478  | 2.89E-08 | 1.78E-07 |
| Prrg3      | 41  | 28.86891964 | 25.08658724 | -3.782332406 | 2.91E-08 | 1.80E-07 |
| Ifitm10    | 34  | 4.292622451 | 2.225757197 | -2.066865255 | 2.92E-08 | 1.80E-07 |
| Armcx5     | 25  | 22.93495282 | 17.76703264 | -5.167920173 | 3.00E-08 | 1.85E-07 |
| Gprasp1    | 25  | 22.93495282 | 17.76703264 | -5.167920173 | 3.00E-08 | 1.85E-07 |
| Mir466n    | 2   | 60.52320828 | 35.37699434 | -25.14621395 | 3.03E-08 | 1.86E-07 |
| Nol3       | 8   | 7.1467404   | 2.755020585 | -4.391719814 | 3.08E-08 | 1.89E-07 |
| 30547E08F  | 1   | 73.75       | 32.25806452 | -41.49193548 | 3.13E-08 | 1.93E-07 |
| Bscl2      | 10  | 3.367615157 | 1.467713762 | -1.899901395 | 3.16E-08 | 1.94E-07 |
| Mir125a    | 5   | 84.51147679 | 74.32525788 | -10.18621891 | 3.20E-08 | 1.96E-07 |
| Frs3os     | 4   | 74.15014498 | 65.101747   | -9.048397983 | 3.21E-08 | 1.97E-07 |
| Cldn18     | 5   | 91.58606446 | 96.37882794 | 4.79276348   | 3.24E-08 | 1.99E-07 |
| Spag17     | 7   | 17.79195003 | 15.28231351 | -2.509636517 | 3.26E-08 | 2.00E-07 |
| Mir7080    | 2   | 76.50713583 | 53.625      | -22.88213583 | 3.34E-08 | 2.05E-07 |
| Prdm16     | 121 | 2.418173677 | 1.667268961 | -0.750904716 | 3.41E-08 | 2.09E-07 |
| Neil1      | 5   | 93.71306878 | 85.86932215 | -7.843746627 | 3.42E-08 | 2.10E-07 |
| Pcdha1     | 3   | 46.29756209 | 68.59774213 | 22.30018004  | 3.46E-08 | 2.12E-07 |
| Rapgef3    | 40  | 3.759052802 | 2.551598234 | -1.207454568 | 3.46E-08 | 2.12E-07 |
| Fstl4      | 88  | 5.935294957 | 5.541628725 | -0.393666232 | 3.54E-08 | 2.17E-07 |
| Arhgap24   | 18  | 13.3721948  | 21.06714055 | 7.694945743  | 3.60E-08 | 2.21E-07 |
| Hoxa10     | 26  | 36.96511039 | 34.67504601 | -2.290064376 | 3.63E-08 | 2.22E-07 |
| Ggh        | 28  | 3.931431117 | 2.06319978  | -1.868231336 | 3.67E-08 | 2.24E-07 |
| Scimp      | 4   | 50.74133359 | 36.93181818 | -13.80951541 | 3.72E-08 | 2.27E-07 |
| 30008D07F  | 4   | 33.38327254 | 23.24568238 | -10.13759016 | 3.77E-08 | 2.30E-07 |
| Rhoc       | 32  | 4.661050424 | 2.46678143  | -2.194268994 | 3.78E-08 | 2.31E-07 |
| Trim62     | 65  | 4.283107869 | 3.074346559 | -1.20876131  | 3.78E-08 | 2.31E-07 |
| Wdfy3      | 129 | 1.829536944 | 1.299033121 | -0.530503823 | 3.78E-08 | 2.31E-07 |
| Uba1       | 12  | 20.15601282 | 13.40432232 | -6.751690506 | 3.81E-08 | 2.32E-07 |
| Rcsd1      | 19  | 6.104455222 | 10.54081063 | 4.436355411  | 3.88E-08 | 2.37E-07 |
| Acsl4      | 25  | 19.35311428 | 14.88117112 | -4.471943158 | 3.90E-08 | 2.38E-07 |

|            |     |             |             |              |          |          |
|------------|-----|-------------|-------------|--------------|----------|----------|
| Ccdc152    | 9   | 75.6066219  | 68.68217258 | -6.924449318 | 4.17E-08 | 2.54E-07 |
| !30312C02F | 18  | 17.11568155 | 12.27188253 | -4.843799017 | 4.24E-08 | 2.58E-07 |
| Ctsa       | 41  | 6.471680268 | 4.696584052 | -1.775096216 | 4.25E-08 | 2.59E-07 |
| Rbm46os    | 6   | 32.72357724 | 23.1292517  | -9.594325535 | 4.26E-08 | 2.59E-07 |
| Casc4      | 56  | 4.702209462 | 2.799647478 | -1.902561984 | 4.27E-08 | 2.60E-07 |
| Wisp2      | 2   | 21.73913043 | 5.917538987 | -15.82159145 | 4.28E-08 | 2.60E-07 |
| !30039L03F | 4   | 26.26842624 | 15.03838612 | -11.23004012 | 4.31E-08 | 2.62E-07 |
| Otud5      | 111 | 15.79469772 | 13.75348456 | -2.041213162 | 4.38E-08 | 2.66E-07 |
| Rhox13     | 15  | 97.64543115 | 94.57354376 | -3.071887393 | 4.38E-08 | 2.66E-07 |
| Med12      | 28  | 22.90553226 | 18.26373515 | -4.641797108 | 4.53E-08 | 2.75E-07 |
| Clcn4-2    | 66  | 3.733392572 | 2.239351605 | -1.494040967 | 4.67E-08 | 2.84E-07 |
| Mcts1      | 6   | 22.50505608 | 12.6361544  | -9.868901681 | 4.70E-08 | 2.85E-07 |
| Cyp4f39    | 22  | 34.72004554 | 32.84190011 | -1.878145429 | 4.77E-08 | 2.89E-07 |
| Edn3       | 31  | 39.42349342 | 43.72726027 | 4.303766845  | 4.80E-08 | 2.91E-07 |
| Ethe1      | 6   | 55.01096491 | 68.56140688 | 13.55044197  | 4.86E-08 | 2.94E-07 |
| Slc1a2     | 78  | 8.943854613 | 11.99542846 | 3.051573849  | 4.91E-08 | 2.97E-07 |
| Gramd1a    | 51  | 3.098255348 | 2.273810743 | -0.824444606 | 4.94E-08 | 2.99E-07 |
| Gngt2      | 6   | 48.32573629 | 35.65961112 | -12.66612517 | 5.09E-08 | 3.08E-07 |
| Dbx2       | 59  | 38.32133979 | 35.83376792 | -2.487571875 | 5.12E-08 | 3.10E-07 |
| Gcsam      | 3   | 23.09202609 | 8.251310739 | -14.84071535 | 5.16E-08 | 3.12E-07 |
| Phox2b     | 4   | 38.61250818 | 28.18474405 | -10.42776412 | 5.22E-08 | 3.15E-07 |
| Rtn4r      | 88  | 3.004156875 | 2.117749002 | -0.886407873 | 5.39E-08 | 3.26E-07 |
| Cdsn       | 6   | 55.05357335 | 48.01582823 | -7.037745117 | 5.39E-08 | 3.26E-07 |
| Trps1      | 40  | 3.475275501 | 1.904125756 | -1.571149745 | 5.53E-08 | 3.34E-07 |
| Fndc4      | 56  | 3.286714969 | 2.452804655 | -0.833910314 | 5.63E-08 | 3.40E-07 |
| Adamts14   | 46  | 4.538842386 | 3.118945131 | -1.419897255 | 5.84E-08 | 3.52E-07 |
| Mansc4     | 13  | 49.91549996 | 56.52753792 | 6.612037966  | 5.92E-08 | 3.57E-07 |
| Zdhhc14    | 112 | 3.999076841 | 3.312548088 | -0.686528753 | 5.93E-08 | 3.58E-07 |
| Srgap3     | 15  | 3.321895014 | 1.766842777 | -1.555052237 | 6.12E-08 | 3.69E-07 |
| Ednra      | 31  | 22.18398483 | 19.40564905 | -2.778335783 | 6.12E-08 | 3.69E-07 |
| Rfng       | 39  | 2.176288298 | 1.179404882 | -0.996883416 | 6.32E-08 | 3.81E-07 |
| Gsg1l      | 44  | 9.024249732 | 12.63270279 | 3.608453059  | 6.39E-08 | 3.85E-07 |
| Pou3f2     | 8   | 21.9235337  | 15.43592856 | -6.487605141 | 6.43E-08 | 3.87E-07 |
| Ccdc149    | 36  | 2.239513686 | 1.732876693 | -0.506636993 | 6.44E-08 | 3.87E-07 |



|            |    |             |             |              |          |          |
|------------|----|-------------|-------------|--------------|----------|----------|
| Fam213b    | 17 | 32.42292613 | 28.10720987 | -4.315716259 | 6.46E-08 | 3.88E-07 |
| Gm9839     | 2  | 84.92840444 | 69.57633875 | -15.35206569 | 6.69E-08 | 4.02E-07 |
| Pabpc2     | 7  | 98.38761742 | 93.87218232 | -4.515435106 | 6.70E-08 | 4.03E-07 |
| Erich4     | 2  | 69.3346574  | 50.51352819 | -18.82112921 | 6.79E-08 | 4.08E-07 |
| 30052D11F  | 3  | 8.721167856 | 4.032301048 | -4.688866809 | 6.79E-08 | 4.08E-07 |
| Thbs1      | 2  | 16.54794709 | 27.46249705 | 10.91454995  | 6.81E-08 | 4.08E-07 |
| Psd2       | 16 | 13.36236648 | 8.121783323 | -5.240583156 | 6.85E-08 | 4.10E-07 |
| Nrxn2      | 12 | 4.332022487 | 7.570486642 | 3.238464155  | 6.89E-08 | 4.13E-07 |
| Meis3      | 30 | 2.787938121 | 1.326106564 | -1.461831557 | 6.98E-08 | 4.18E-07 |
| Adamts1    | 21 | 4.981102826 | 3.521832883 | -1.459269943 | 7.01E-08 | 4.20E-07 |
| Smad9      | 31 | 11.34835893 | 7.942001195 | -3.40635774  | 7.21E-08 | 4.31E-07 |
| Mctp2      | 4  | 42.92546831 | 26.80563253 | -16.11983579 | 7.21E-08 | 4.32E-07 |
| Tbx3os2    | 4  | 4.93308592  | 0.927761072 | -4.005324848 | 7.23E-08 | 4.32E-07 |
| Kcnt2      | 7  | 38.07998202 | 28.56500438 | -9.514977642 | 7.24E-08 | 4.33E-07 |
| Cpn1       | 16 | 11.54866317 | 9.092451638 | -2.456211535 | 7.29E-08 | 4.35E-07 |
| Gm5878     | 16 | 52.06003681 | 56.9409063  | 4.880869486  | 7.32E-08 | 4.37E-07 |
| Mir7215    | 1  | 60          | 29.88505747 | -30.11494253 | 7.32E-08 | 4.37E-07 |
| Rpgr       | 27 | 16.31179173 | 11.70774644 | -4.604045288 | 7.35E-08 | 4.39E-07 |
| Samd11     | 1  | 40.52287582 | 15.59633028 | -24.92654554 | 7.55E-08 | 4.50E-07 |
| G6pc3      | 24 | 5.75672931  | 4.778292504 | -0.978436807 | 7.69E-08 | 4.58E-07 |
| Abcc6      | 5  | 29.14285714 | 15.97693205 | -13.1659251  | 7.72E-08 | 4.60E-07 |
| Akap7      | 11 | 87.17419817 | 80.75731734 | -6.416880828 | 7.77E-08 | 4.63E-07 |
| 10028E06F  | 3  | 56.77575758 | 38.56787822 | -18.20787935 | 7.99E-08 | 4.76E-07 |
| Zcchc16    | 2  | 50.39819447 | 30.574795   | -19.82339947 | 8.01E-08 | 4.77E-07 |
| Krt35      | 15 | 89.10376423 | 84.14345302 | -4.960311207 | 8.19E-08 | 4.88E-07 |
| 30088E08F  | 4  | 43.3670889  | 29.06198423 | -14.30510467 | 8.25E-08 | 4.91E-07 |
| Gm6994     | 2  | 83.33333333 | 54.46428571 | -28.86904762 | 8.34E-08 | 4.96E-07 |
| Smpd5      | 13 | 25.20552434 | 19.59331151 | -5.61221283  | 8.45E-08 | 5.02E-07 |
| Zfp334     | 18 | 6.793333671 | 4.551817762 | -2.241515909 | 8.66E-08 | 5.15E-07 |
| Clmp       | 29 | 22.31741723 | 28.20839553 | 5.890978305  | 8.79E-08 | 5.22E-07 |
| L10046J04R | 4  | 7.452028509 | 2.062893226 | -5.389135283 | 8.82E-08 | 5.23E-07 |
| Arxes1     | 6  | 31.72540659 | 22.37720744 | -9.34819915  | 8.86E-08 | 5.26E-07 |
| Fut1       | 7  | 19.11773929 | 28.61142198 | 9.493682696  | 8.93E-08 | 5.29E-07 |
| Med14      | 68 | 13.3202138  | 11.3172523  | -2.0029615   | 8.93E-08 | 5.30E-07 |

|            |     |             |             |              |          |          |
|------------|-----|-------------|-------------|--------------|----------|----------|
| Cck        | 6   | 7.265972504 | 3.677063477 | -3.588909026 | 9.08E-08 | 5.38E-07 |
| Six1       | 27  | 52.85986414 | 59.83071567 | 6.970851532  | 9.10E-08 | 5.39E-07 |
| '00018B08F | 18  | 79.94159795 | 73.76908885 | -6.172509097 | 9.17E-08 | 5.43E-07 |
| Stk32a     | 19  | 3.664948088 | 2.265363703 | -1.399584386 | 9.37E-08 | 5.55E-07 |
| Zfp667     | 31  | 2.230089642 | 1.208343066 | -1.021746576 | 9.43E-08 | 5.58E-07 |
| Pcsk1n     | 15  | 45.18889918 | 37.84596025 | -7.342938928 | 9.51E-08 | 5.63E-07 |
| Tmem91     | 23  | 21.66950023 | 25.8680474  | 4.198547174  | 9.58E-08 | 5.66E-07 |
| Strc       | 2   | 89.88095238 | 73.59331476 | -16.28763762 | 9.65E-08 | 5.71E-07 |
| Lrrc4      | 33  | 71.25262517 | 74.72973131 | 3.477106143  | 9.67E-08 | 5.71E-07 |
| Slc9a3     | 26  | 7.422999297 | 5.082439357 | -2.340559941 | 9.69E-08 | 5.72E-07 |
| Sh2d4a     | 7   | 19.14878819 | 11.50170534 | -7.647082853 | 9.75E-08 | 5.75E-07 |
| Hddc2      | 27  | 2.118843932 | 1.2096057   | -0.909238232 | 9.92E-08 | 5.85E-07 |
| Al463170   | 2   | 49.15957293 | 31.38540834 | -17.7741646  | 9.98E-08 | 5.88E-07 |
| Cdca7l     | 59  | 1.794676602 | 1.186027419 | -0.608649184 | 1.00E-07 | 5.92E-07 |
| Soga1      | 116 | 5.479156433 | 4.78862734  | -0.690529093 | 1.03E-07 | 6.05E-07 |
| AA467197   | 7   | 60.01195495 | 69.82539785 | 9.813442901  | 1.04E-07 | 6.11E-07 |
| Entpd3     | 15  | 24.62288904 | 19.88984402 | -4.733045019 | 1.08E-07 | 6.36E-07 |
| Smim5      | 6   | 62.17525934 | 52.74093887 | -9.43432047  | 1.10E-07 | 6.46E-07 |
| Mapk8ip2   | 25  | 41.73548289 | 47.71701448 | 5.981531583  | 1.10E-07 | 6.47E-07 |
| Ip6k1      | 51  | 3.496531989 | 2.117897222 | -1.378634767 | 1.15E-07 | 6.74E-07 |
| Col13a1    | 20  | 11.00780318 | 7.413331582 | -3.594471599 | 1.15E-07 | 6.74E-07 |
| Hoxd13     | 65  | 54.50139806 | 58.28222746 | 3.780829407  | 1.17E-07 | 6.86E-07 |
| Syt13      | 12  | 7.777924005 | 3.368134506 | -4.4097895   | 1.17E-07 | 6.89E-07 |
| Cdk3-ps    | 1   | 49.27536232 | 18.10344828 | -31.17191404 | 1.20E-07 | 7.05E-07 |
| Prss35     | 9   | 46.39204991 | 55.41161774 | 9.019567832  | 1.21E-07 | 7.08E-07 |
| Slc6a11    | 11  | 41.33957229 | 47.64100295 | 6.301430659  | 1.21E-07 | 7.13E-07 |
| Mir5626    | 3   | 92.33038348 | 79.00277817 | -13.32760531 | 1.24E-07 | 7.28E-07 |
| Eil3       | 22  | 12.35445152 | 9.481649303 | -2.872802215 | 1.24E-07 | 7.28E-07 |
| Syt5       | 18  | 28.88800668 | 26.25867827 | -2.629328418 | 1.26E-07 | 7.36E-07 |
| Rps6kl1    | 28  | 31.51599135 | 27.80033319 | -3.715658156 | 1.28E-07 | 7.49E-07 |
| Zfp488     | 3   | 16.09047228 | 4.67143569  | -11.41903659 | 1.29E-07 | 7.55E-07 |
| Gal3st1    | 44  | 6.959820684 | 4.873439795 | -2.086380889 | 1.30E-07 | 7.62E-07 |
| Mir34b     | 17  | 5.49993787  | 2.437174237 | -3.062763632 | 1.35E-07 | 7.87E-07 |
| '00064M15f | 30  | 4.986221915 | 3.550394421 | -1.435827494 | 1.35E-07 | 7.91E-07 |

|            |     |             |             |              |          |          |
|------------|-----|-------------|-------------|--------------|----------|----------|
| Shisa9     | 29  | 18.36063689 | 15.03185906 | -3.328777828 | 1.37E-07 | 8.03E-07 |
| 00048M11f  | 6   | 94.82782114 | 88.72237027 | -6.105450869 | 1.38E-07 | 8.08E-07 |
| Cela3b     | 2   | 57.8679078  | 26.18984664 | -31.67806116 | 1.38E-07 | 8.08E-07 |
| Meikin     | 1   | 94.11764706 | 67.01030928 | -27.10733778 | 1.38E-07 | 8.09E-07 |
| Rtn2       | 49  | 4.867754476 | 4.101733654 | -0.766020822 | 1.40E-07 | 8.17E-07 |
| Myh11      | 17  | 19.53029973 | 23.82632341 | 4.296023678  | 1.42E-07 | 8.26E-07 |
| Krt81      | 7   | 91.5193254  | 81.8977611  | -9.6215643   | 1.43E-07 | 8.36E-07 |
| Shisa8     | 88  | 8.363722313 | 11.09273965 | 2.729017341  | 1.49E-07 | 8.70E-07 |
| Dnmt3l     | 4   | 78.97828014 | 63.33151946 | -15.64676069 | 1.53E-07 | 8.91E-07 |
| Mid1ip1    | 18  | 18.68439786 | 13.74668257 | -4.937715296 | 1.54E-07 | 8.95E-07 |
| Irak3      | 37  | 5.321621774 | 8.947461818 | 3.625840044  | 1.57E-07 | 9.12E-07 |
| Dleu7      | 42  | 30.52147093 | 27.66598185 | -2.855489081 | 1.59E-07 | 9.26E-07 |
| Ppp2r5a    | 115 | 7.528672466 | 8.476851024 | 0.948178558  | 1.59E-07 | 9.26E-07 |
| Mir2139    | 4   | 58.82247225 | 41.19740309 | -17.62506916 | 1.61E-07 | 9.34E-07 |
| Prkcdpb    | 15  | 4.046530082 | 2.041515222 | -2.005014859 | 1.67E-07 | 9.72E-07 |
| Nr2e1      | 28  | 29.24288668 | 34.30517196 | 5.062285281  | 1.77E-07 | 1.03E-06 |
| Atp2a3     | 52  | 8.760727444 | 6.838954629 | -1.921772815 | 1.81E-07 | 1.05E-06 |
| Syt9       | 80  | 11.75609571 | 11.33941401 | -0.416681691 | 1.83E-07 | 1.06E-06 |
| Cask       | 69  | 20.19590712 | 17.11865332 | -3.077253803 | 1.88E-07 | 1.09E-06 |
| Disp1      | 38  | 1.523145238 | 0.937278753 | -0.585866485 | 1.89E-07 | 1.10E-06 |
| Pax2       | 77  | 14.99061024 | 14.67872783 | -0.311882419 | 1.90E-07 | 1.10E-06 |
| Prex1      | 84  | 4.392383083 | 3.649409198 | -0.742973884 | 1.93E-07 | 1.12E-06 |
| Nkx2-1     | 80  | 12.41631234 | 15.9945135  | 3.578201159  | 1.96E-07 | 1.13E-06 |
| AW011738   | 51  | 1.981306028 | 1.434468032 | -0.546837996 | 1.96E-07 | 1.14E-06 |
| Sms        | 84  | 20.51032734 | 18.4019988  | -2.108328542 | 1.97E-07 | 1.14E-06 |
| Ltbp2      | 41  | 14.15715066 | 17.25443786 | 3.097287207  | 2.01E-07 | 1.16E-06 |
| Sult2a4    | 5   | 93.19432563 | 85.13520745 | -8.059118181 | 2.02E-07 | 1.17E-06 |
| Ltbr       | 32  | 3.233730993 | 1.787623029 | -1.446107964 | 2.04E-07 | 1.18E-06 |
| 030544G11f | 3   | 95.17582525 | 72.91666667 | -22.25915859 | 2.04E-07 | 1.18E-06 |
| Hoxa2      | 21  | 42.97668902 | 46.92710146 | 3.950412441  | 2.06E-07 | 1.19E-06 |
| Pnliprp1   | 2   | 37.37722192 | 24.3599493  | -13.01727261 | 2.09E-07 | 1.21E-06 |
| Mir142b    | 13  | 63.44096111 | 56.77579098 | -6.665170139 | 2.17E-07 | 1.26E-06 |
| Atp6ap1    | 4   | 28.92063984 | 14.63637001 | -14.28426983 | 2.18E-07 | 1.26E-06 |
| Klhl29     | 83  | 37.99348851 | 36.09900302 | -1.894485489 | 2.24E-07 | 1.29E-06 |

|            |     |             |             |              |          |          |
|------------|-----|-------------|-------------|--------------|----------|----------|
| Cmc4       | 17  | 23.25189534 | 18.4322849  | -4.819610441 | 2.37E-07 | 1.37E-06 |
| Mtcp1      | 17  | 23.25189534 | 18.4322849  | -4.819610441 | 2.37E-07 | 1.37E-06 |
| Prr29      | 6   | 56.12690906 | 46.33928836 | -9.787620707 | 2.38E-07 | 1.37E-06 |
| Nes        | 33  | 3.174764234 | 2.214375915 | -0.960388318 | 2.38E-07 | 1.37E-06 |
| Bcap31     | 5   | 30.76696165 | 17.35180412 | -13.41515753 | 2.39E-07 | 1.38E-06 |
| Krt7       | 23  | 28.24568245 | 22.59122454 | -5.654457913 | 2.42E-07 | 1.39E-06 |
| Fam199x    | 44  | 19.11617068 | 15.30428603 | -3.811884651 | 2.46E-07 | 1.42E-06 |
| i30011L22R | 48  | 2.351418847 | 1.564275514 | -0.787143333 | 2.46E-07 | 1.42E-06 |
| Bace1      | 29  | 3.119829151 | 1.763102165 | -1.356726986 | 2.47E-07 | 1.42E-06 |
| Pla2g2c    | 2   | 19.41706562 | 8.362831263 | -11.05423435 | 2.51E-07 | 1.44E-06 |
| Dusp15     | 50  | 5.52146611  | 7.490560955 | 1.969094844  | 2.53E-07 | 1.45E-06 |
| Gm38426    | 18  | 76.14921067 | 80.079477   | 3.930266331  | 2.55E-07 | 1.46E-06 |
| Fam149a    | 2   | 18.42100437 | 8.269350651 | -10.15165371 | 2.57E-07 | 1.48E-06 |
| Npffr1     | 26  | 14.17207582 | 18.78232552 | 4.610249697  | 2.57E-07 | 1.48E-06 |
| Krtap15    | 2   | 91.66666667 | 67.72151899 | -23.94514768 | 2.59E-07 | 1.49E-06 |
| Itih1      | 3   | 74.35527896 | 59.12880202 | -15.22647694 | 2.60E-07 | 1.49E-06 |
| i10468N07F | 22  | 4.668402507 | 8.901646793 | 4.233244286  | 2.60E-07 | 1.49E-06 |
| Tmem132a   | 25  | 2.716612072 | 1.520683544 | -1.195928528 | 2.68E-07 | 1.54E-06 |
| Zp3        | 3   | 77.0899416  | 47.9020371  | -29.1879045  | 2.69E-07 | 1.54E-06 |
| Utf1       | 36  | 43.99761902 | 47.70674155 | 3.709122534  | 2.71E-07 | 1.55E-06 |
| Gabre      | 6   | 26.19892569 | 17.25622076 | -8.942704933 | 2.71E-07 | 1.55E-06 |
| Ube2ql1    | 81  | 31.47327258 | 34.34387715 | 2.870604571  | 2.72E-07 | 1.56E-06 |
| B4galnt1   | 139 | 2.366177445 | 1.627670694 | -0.738506751 | 2.78E-07 | 1.59E-06 |
| Bbs7       | 24  | 1.554811685 | 2.88455376  | 1.329742075  | 2.78E-07 | 1.59E-06 |
| Htr6       | 82  | 5.474862791 | 4.795118908 | -0.679743883 | 2.84E-07 | 1.62E-06 |
| Fgf10      | 34  | 26.48254847 | 30.80878006 | 4.326231592  | 2.86E-07 | 1.64E-06 |
| AU022754   | 89  | 1.679639016 | 1.320567456 | -0.359071559 | 2.88E-07 | 1.64E-06 |
| L10035E14F | 5   | 72.84218081 | 61.14758749 | -11.69459332 | 2.88E-07 | 1.64E-06 |
| Rtkn       | 24  | 13.39054462 | 9.633220389 | -3.757324233 | 2.91E-07 | 1.66E-06 |
| Ssh2       | 88  | 2.028232122 | 1.220580423 | -0.807651699 | 3.04E-07 | 1.73E-06 |
| Plcb2      | 3   | 36.06771835 | 19.63755199 | -16.43016636 | 3.05E-07 | 1.74E-06 |
| Mir6991    | 81  | 92.64632932 | 93.77575981 | 1.129430491  | 3.05E-07 | 1.74E-06 |
| Ripk3      | 16  | 20.58446121 | 16.13533491 | -4.449126306 | 3.07E-07 | 1.75E-06 |
| Gm12942    | 18  | 2.692615201 | 1.374017161 | -1.31859804  | 3.11E-07 | 1.77E-06 |

|            |     |             |             |              |          |          |
|------------|-----|-------------|-------------|--------------|----------|----------|
| Cdk16      | 48  | 13.15875531 | 10.64064951 | -2.518105793 | 3.15E-07 | 1.79E-06 |
| 700049L16F | 4   | 92.8969697  | 81.12302891 | -11.77394079 | 3.17E-07 | 1.81E-06 |
| Mrps23     | 52  | 26.185642   | 29.453188   | 3.267546001  | 3.18E-07 | 1.81E-06 |
| Pdp2       | 3   | 38.20165107 | 54.39307187 | 16.1914208   | 3.23E-07 | 1.83E-06 |
| Steap3     | 22  | 3.200482602 | 1.080466929 | -2.120015673 | 3.26E-07 | 1.85E-06 |
| 130030E09F | 22  | 33.55033728 | 27.85302095 | -5.697316333 | 3.27E-07 | 1.86E-06 |
| Pkdcc      | 98  | 3.096054739 | 2.46572923  | -0.630325509 | 3.29E-07 | 1.87E-06 |
| Slc16a11   | 10  | 52.44502231 | 64.41939089 | 11.97436858  | 3.34E-07 | 1.90E-06 |
| Mir671     | 35  | 69.1511525  | 65.41557659 | -3.735575905 | 3.43E-07 | 1.95E-06 |
| Eml2       | 16  | 2.598596959 | 1.299823381 | -1.298773577 | 3.45E-07 | 1.96E-06 |
| 130416O09F | 5   | 73.18047926 | 79.82306678 | 6.642587515  | 3.61E-07 | 2.05E-06 |
| Phyhipl    | 135 | 26.07500776 | 27.86362727 | 1.788619511  | 3.76E-07 | 2.13E-06 |
| Tifa       | 12  | 22.07880142 | 17.69791441 | -4.380887008 | 3.77E-07 | 2.13E-06 |
| Vav3       | 109 | 2.267294671 | 1.436700016 | -0.830594655 | 3.77E-07 | 2.14E-06 |
| Thegl      | 43  | 17.1936087  | 19.35389926 | 2.160290555  | 3.79E-07 | 2.15E-06 |
| 133440J02R | 4   | 81.04189233 | 69.90844625 | -11.13344608 | 3.81E-07 | 2.16E-06 |
| Gm6904     | 2   | 73.64550225 | 56.73963134 | -16.90587092 | 3.83E-07 | 2.17E-06 |
| Mir7676-2  | 4   | 76.6247888  | 63.30983117 | -13.31495763 | 3.99E-07 | 2.26E-06 |
| Mir7676-1  | 4   | 76.6247888  | 63.30983117 | -13.31495763 | 3.99E-07 | 2.26E-06 |
| Tmem145    | 37  | 3.737592204 | 2.191913223 | -1.545678981 | 4.02E-07 | 2.27E-06 |
| Map6d1     | 43  | 3.571201862 | 2.139761602 | -1.43144026  | 4.07E-07 | 2.30E-06 |
| Gbp7       | 8   | 7.090734277 | 3.857696306 | -3.233037971 | 4.07E-07 | 2.30E-06 |
| Hist3h2ba  | 4   | 4.310344828 | 18.99932387 | 14.68897904  | 4.20E-07 | 2.37E-06 |
| Arhgef25   | 23  | 63.02552815 | 58.06708997 | -4.958438188 | 4.21E-07 | 2.38E-06 |
| Inpp5d     | 4   | 98.57645875 | 90.94488189 | -7.631576863 | 4.38E-07 | 2.47E-06 |
| Zfp423     | 124 | 13.3056245  | 12.92450666 | -0.381117843 | 4.40E-07 | 2.48E-06 |
| Gm10560    | 4   | 75.50578906 | 86.0143446  | 10.50855554  | 4.42E-07 | 2.49E-06 |
| Ch25h      | 6   | 20.7140515  | 25.80779562 | 5.093744122  | 4.45E-07 | 2.51E-06 |
| Epha8      | 95  | 7.440386586 | 6.103280507 | -1.337106079 | 4.47E-07 | 2.52E-06 |
| Nkpd1      | 9   | 48.05183209 | 39.77094752 | -8.280884566 | 4.60E-07 | 2.59E-06 |
| Tenm4      | 106 | 49.94734773 | 47.80488394 | -2.142463791 | 4.60E-07 | 2.59E-06 |
| Htr2a      | 5   | 20.23259128 | 10.72683631 | -9.505754968 | 4.61E-07 | 2.59E-06 |
| Slco4c1    | 14  | 23.20636405 | 19.40026629 | -3.806097753 | 4.63E-07 | 2.60E-06 |
| Cyth4      | 3   | 63.66767947 | 53.04166637 | -10.6260131  | 4.69E-07 | 2.64E-06 |

|            |    |             |             |              |          |          |
|------------|----|-------------|-------------|--------------|----------|----------|
| Sim1       | 43 | 41.33031332 | 45.10133813 | 3.771024814  | 4.72E-07 | 2.65E-06 |
| Pdyn       | 2  | 9.89678748  | 3.097919022 | -6.798868459 | 4.74E-07 | 2.66E-06 |
| Iqcf3      | 4  | 45.68636677 | 31.08150125 | -14.60486552 | 4.81E-07 | 2.70E-06 |
| Kansl3     | 72 | 2.998887489 | 1.703831762 | -1.295055727 | 4.92E-07 | 2.76E-06 |
| Dync2h1    | 12 | 39.92844942 | 49.56724159 | 9.638792173  | 5.11E-07 | 2.87E-06 |
| 330526I15R | 79 | 1.248839044 | 1.81873293  | 0.569893886  | 5.19E-07 | 2.91E-06 |
| Xlr3a      | 3  | 79.91334808 | 65.9541825  | -13.95916558 | 5.36E-07 | 3.00E-06 |
| Camk2b     | 74 | 17.80733449 | 21.55545962 | 3.74812513   | 5.55E-07 | 3.11E-06 |
| Mcidas     | 66 | 12.46563483 | 11.71620809 | -0.749426739 | 5.55E-07 | 3.11E-06 |
| Foxb2      | 16 | 36.10828766 | 41.77385136 | 5.665563696  | 5.62E-07 | 3.15E-06 |
| Ush2a      | 9  | 86.73745412 | 80.06049057 | -6.676963555 | 5.66E-07 | 3.17E-06 |
| 310405F15F | 3  | 10.82908901 | 2.906439247 | -7.922649765 | 5.69E-07 | 3.19E-06 |
| Reep2      | 9  | 48.87184623 | 55.7452217  | 6.873375473  | 5.72E-07 | 3.20E-06 |
| Ntm        | 11 | 36.73643128 | 31.16587366 | -5.570557617 | 5.75E-07 | 3.21E-06 |
| Otof       | 8  | 22.89372998 | 13.08256062 | -9.811169366 | 5.92E-07 | 3.31E-06 |
| Rnf222     | 1  | 88.06584362 | 71.02803738 | -17.03780624 | 5.93E-07 | 3.31E-06 |
| Platr14    | 3  | 86.95823696 | 74.79873424 | -12.15950272 | 6.03E-07 | 3.37E-06 |
| Fam120c    | 22 | 16.33223948 | 12.52876073 | -3.803478759 | 6.11E-07 | 3.41E-06 |
| Msl3       | 65 | 16.70582057 | 13.40534689 | -3.300473679 | 6.27E-07 | 3.50E-06 |
| Gm10584    | 31 | 7.181178519 | 10.40501108 | 3.223832558  | 6.44E-07 | 3.59E-06 |
| Mir1900    | 40 | 2.716016666 | 1.546450407 | -1.169566259 | 6.48E-07 | 3.61E-06 |
| Oxt        | 10 | 55.82969588 | 62.16009892 | 6.33040304   | 6.52E-07 | 3.63E-06 |
| Tspan11    | 9  | 8.216478399 | 4.743672715 | -3.472805684 | 6.54E-07 | 3.65E-06 |
| Col26a1    | 23 | 22.07112298 | 17.83847941 | -4.232643566 | 6.57E-07 | 3.66E-06 |
| 30159M07F  | 30 | 2.377047265 | 1.619544724 | -0.757502541 | 6.58E-07 | 3.67E-06 |
| Cacng5     | 2  | 40.89413876 | 28.07081807 | -12.82332069 | 6.62E-07 | 3.68E-06 |
| Slc36a2    | 2  | 40.8434369  | 26.15622815 | -14.68720875 | 6.70E-07 | 3.73E-06 |
| Ttc9b      | 50 | 10.56939498 | 8.777867425 | -1.791527556 | 6.82E-07 | 3.79E-06 |
| 30562C15F  | 4  | 78.16955549 | 62.57278481 | -15.59677068 | 6.91E-07 | 3.84E-06 |
| Rhox9      | 3  | 92.4062093  | 80.41648105 | -11.98972825 | 6.96E-07 | 3.87E-06 |
| Osbp17     | 15 | 8.241030262 | 3.915373368 | -4.325656893 | 7.02E-07 | 3.90E-06 |
| Mast1      | 7  | 12.48982672 | 18.18434924 | 5.694522516  | 7.04E-07 | 3.91E-06 |
| Mir3104    | 4  | 60.24127675 | 50.14795731 | -10.09331943 | 7.05E-07 | 3.91E-06 |
| Tjp3       | 29 | 16.02394689 | 13.09342405 | -2.930522838 | 7.34E-07 | 4.07E-06 |

|            |    |             |             |              |          |          |
|------------|----|-------------|-------------|--------------|----------|----------|
| 700108J01R | 5  | 71.35395208 | 61.69702543 | -9.656926646 | 7.34E-07 | 4.07E-06 |
| Mir6985    | 5  | 27.82703157 | 17.71491328 | -10.1121183  | 7.36E-07 | 4.08E-06 |
| Hes3       | 3  | 31.48607665 | 18.59266834 | -12.8934083  | 7.43E-07 | 4.12E-06 |
| Pcdhga2    | 6  | 58.27868672 | 69.37621152 | 11.0975248   | 7.44E-07 | 4.12E-06 |
| Klhl13     | 15 | 24.09665388 | 33.04826066 | 8.951606786  | 7.49E-07 | 4.15E-06 |
| L30310I04R | 8  | 64.51328196 | 55.0056528  | -9.507629157 | 7.55E-07 | 4.18E-06 |
| Rnf144a    | 24 | 36.43448637 | 41.07699584 | 4.642509472  | 7.62E-07 | 4.21E-06 |
| Pitx2      | 25 | 39.50044979 | 36.28874164 | -3.211708145 | 7.69E-07 | 4.25E-06 |
| Prokr2     | 24 | 5.743444143 | 9.988900392 | 4.245456249  | 7.74E-07 | 4.28E-06 |
| Acss3      | 6  | 28.60745292 | 23.24362272 | -5.363830192 | 7.75E-07 | 4.29E-06 |
| Nfasc      | 24 | 5.077679156 | 8.427238992 | 3.349559836  | 7.77E-07 | 4.29E-06 |
| Fam159b    | 24 | 14.88073622 | 11.54185481 | -3.338881406 | 7.80E-07 | 4.31E-06 |
| Inpp5j     | 5  | 68.74571087 | 62.50430229 | -6.241408578 | 7.82E-07 | 4.32E-06 |
| Ppp1r3fos  | 27 | 29.71217054 | 24.62691721 | -5.08525333  | 8.00E-07 | 4.42E-06 |
| Mir5103    | 14 | 14.96250223 | 11.34908951 | -3.613412726 | 8.02E-07 | 4.43E-06 |
| Cpa4       | 4  | 74.37945416 | 65.27759969 | -9.101854472 | 8.44E-07 | 4.65E-06 |
| Crocc      | 47 | 19.52408014 | 16.83266635 | -2.691413794 | 8.46E-07 | 4.66E-06 |
| 700123J17R | 7  | 57.29813665 | 45.82232893 | -11.47580771 | 8.46E-07 | 4.66E-06 |
| Ccdc81     | 3  | 81.87120767 | 93.41446924 | 11.54326156  | 8.50E-07 | 4.68E-06 |
| Psg17      | 1  | 57.69230769 | 23.88059701 | -33.81171068 | 8.57E-07 | 4.72E-06 |
| Armcx4     | 19 | 41.80468827 | 31.14503486 | -10.65965341 | 8.58E-07 | 4.72E-06 |
| Tenm2      | 7  | 84.10504053 | 75.71957105 | -8.38546948  | 8.67E-07 | 4.77E-06 |
| Arhgap6    | 18 | 24.75399598 | 19.15197629 | -5.602019685 | 8.81E-07 | 4.84E-06 |
| Sox2       | 34 | 37.14392423 | 33.70771696 | -3.436207267 | 8.92E-07 | 4.91E-06 |
| Kcne1      | 8  | 50.30656877 | 40.59733806 | -9.709230714 | 8.94E-07 | 4.91E-06 |
| Csf3       | 1  | 47.05882353 | 20.32085561 | -26.73796791 | 8.94E-07 | 4.91E-06 |
| Bsn        | 64 | 15.47165748 | 18.6800228  | 3.208365317  | 9.08E-07 | 4.99E-06 |
| Astn1      | 12 | 60.85640727 | 53.20407826 | -7.652329007 | 9.65E-07 | 5.30E-06 |
| Wisp3      | 4  | 74.5686728  | 65.37471008 | -9.193962718 | 9.76E-07 | 5.36E-06 |
| Plxnb1     | 63 | 4.34634355  | 2.900541399 | -1.445802151 | 9.79E-07 | 5.37E-06 |
| Capn12     | 5  | 93.63977893 | 88.00218623 | -5.637592696 | 9.80E-07 | 5.37E-06 |
| Pfkp       | 9  | 5.74131385  | 2.024983445 | -3.716330405 | 9.80E-07 | 5.37E-06 |
| Adra1d     | 83 | 9.325221587 | 12.44450673 | 3.119285145  | 1.01E-06 | 5.55E-06 |
| Chst5      | 32 | 22.73188213 | 19.89826583 | -2.833616297 | 1.02E-06 | 5.56E-06 |

|            |     |             |             |              |          |          |
|------------|-----|-------------|-------------|--------------|----------|----------|
| Psmb11     | 2   | 88.28125    | 69.12742924 | -19.15382076 | 1.02E-06 | 5.56E-06 |
| Prdm5      | 43  | 2.45488079  | 1.538613171 | -0.91626762  | 1.02E-06 | 5.60E-06 |
| Npc1l1     | 3   | 81.06060606 | 60.84839357 | -20.21221249 | 1.05E-06 | 5.72E-06 |
| Rab26      | 15  | 10.85627253 | 16.21194586 | 5.355673332  | 1.05E-06 | 5.72E-06 |
| Ano9       | 1   | 95.08196721 | 64.60176991 | -30.4801973  | 1.07E-06 | 5.87E-06 |
| Adrb2      | 37  | 7.252920288 | 4.734567052 | -2.518353236 | 1.08E-06 | 5.88E-06 |
| Grid2ip    | 24  | 9.411663537 | 13.04396435 | 3.632300818  | 1.09E-06 | 5.95E-06 |
| Otub2      | 48  | 2.262895283 | 1.215806261 | -1.047089022 | 1.09E-06 | 5.95E-06 |
| 130018P22F | 39  | 3.621638271 | 2.28699522  | -1.334643051 | 1.12E-06 | 6.11E-06 |
| Olfr71     | 2   | 63.53052982 | 47.96972523 | -15.56080459 | 1.12E-06 | 6.11E-06 |
| Cyp4f17    | 3   | 6.472249917 | 1.476260401 | -4.995989516 | 1.12E-06 | 6.12E-06 |
| Ccdc79     | 37  | 17.96424559 | 21.03120788 | 3.066962298  | 1.12E-06 | 6.12E-06 |
| Shroom1    | 55  | 4.155706766 | 3.073989202 | -1.081717564 | 1.13E-06 | 6.13E-06 |
| Olfr225    | 3   | 97.29714912 | 84.58402432 | -12.7131248  | 1.13E-06 | 6.16E-06 |
| Coch       | 51  | 32.24451927 | 36.96161651 | 4.717097232  | 1.14E-06 | 6.20E-06 |
| Ggt5       | 6   | 18.38048673 | 14.17664357 | -4.203843162 | 1.14E-06 | 6.23E-06 |
| Myl10      | 1   | 58.66666667 | 19.40298507 | -39.26368159 | 1.15E-06 | 6.26E-06 |
| Man2b2     | 17  | 1.679527123 | 0.314362082 | -1.365165041 | 1.18E-06 | 6.43E-06 |
| Sall1      | 18  | 48.30055514 | 54.65206994 | 6.351514804  | 1.19E-06 | 6.46E-06 |
| Rnf26      | 24  | 1.277700981 | 2.204807989 | 0.927107008  | 1.20E-06 | 6.51E-06 |
| Flt1       | 107 | 3.983720442 | 6.289555347 | 2.305834905  | 1.22E-06 | 6.61E-06 |
| Usp9x      | 28  | 18.58710333 | 14.85335317 | -3.733750158 | 1.22E-06 | 6.61E-06 |
| '00001O22F | 31  | 3.939826384 | 2.479963546 | -1.459862837 | 1.22E-06 | 6.61E-06 |
| Tmprss12   | 11  | 95.06846458 | 90.00142154 | -5.067043034 | 1.22E-06 | 6.62E-06 |
| Fam101b    | 95  | 2.032881743 | 1.494323391 | -0.538558352 | 1.23E-06 | 6.70E-06 |
| Ptpre      | 54  | 1.829551964 | 1.311786335 | -0.517765628 | 1.25E-06 | 6.79E-06 |
| Zfp385b    | 72  | 15.24691727 | 18.78218349 | 3.535266223  | 1.25E-06 | 6.79E-06 |
| Abl1       | 76  | 2.464383309 | 1.538754908 | -0.925628401 | 1.26E-06 | 6.83E-06 |
| Wdr86      | 27  | 21.90184042 | 19.63807563 | -2.263764786 | 1.26E-06 | 6.84E-06 |
| Kcng1      | 8   | 91.13007878 | 86.01719675 | -5.112882026 | 1.26E-06 | 6.84E-06 |
| Btbd9      | 51  | 2.161596684 | 1.255560065 | -0.906036619 | 1.30E-06 | 7.02E-06 |
| 330039A03F | 3   | 24.59490741 | 9.31056701  | -15.2843404  | 1.31E-06 | 7.09E-06 |
| Zfp951     | 5   | 81.94864475 | 68.39553429 | -13.55311046 | 1.31E-06 | 7.09E-06 |
| Mmp28      | 23  | 3.648512806 | 1.384759448 | -2.263753358 | 1.33E-06 | 7.18E-06 |



|            |    |             |             |              |          |          |
|------------|----|-------------|-------------|--------------|----------|----------|
| Nkrf       | 21 | 21.94834285 | 16.84414537 | -5.104197475 | 1.34E-06 | 7.22E-06 |
| Gpr173     | 4  | 65.63108378 | 75.62152754 | 9.990443757  | 1.34E-06 | 7.25E-06 |
| Wap        | 3  | 86.15270437 | 75.5398448  | -10.61285957 | 1.38E-06 | 7.44E-06 |
| Fam184a    | 30 | 32.30593243 | 29.14098156 | -3.164950874 | 1.38E-06 | 7.45E-06 |
| Ache       | 38 | 4.455561144 | 7.471409248 | 3.015848104  | 1.40E-06 | 7.54E-06 |
| Cdc42bpb   | 30 | 1.66240693  | 0.957938535 | -0.704468395 | 1.40E-06 | 7.54E-06 |
| Mgmt       | 6  | 51.57401518 | 62.53225025 | 10.95823507  | 1.41E-06 | 7.63E-06 |
| Ankrd34a   | 5  | 8.434550296 | 3.788187116 | -4.64636318  | 1.42E-06 | 7.63E-06 |
| Ush1c      | 1  | 80.68181818 | 95.16728625 | 14.48546806  | 1.42E-06 | 7.64E-06 |
| Wfikkn2    | 6  | 61.08280104 | 53.16867742 | -7.914123619 | 1.42E-06 | 7.64E-06 |
| Pja1       | 11 | 20.58505057 | 14.99872353 | -5.586327047 | 1.42E-06 | 7.68E-06 |
| Smim10l2a  | 1  | 35.21126761 | 65.74074074 | 30.52947314  | 1.43E-06 | 7.69E-06 |
| Srsf1      | 14 | 14.85782644 | 7.855123757 | -7.002702685 | 1.44E-06 | 7.75E-06 |
| Gjb2       | 53 | 2.676809562 | 3.982730148 | 1.305920585  | 1.46E-06 | 7.86E-06 |
| 730522E02F | 52 | 11.17266807 | 10.22388493 | -0.948783146 | 1.46E-06 | 7.86E-06 |
| Ggt1       | 2  | 96.13259669 | 85.4670947  | -10.66550198 | 1.46E-06 | 7.86E-06 |
| Dlx2       | 64 | 23.08999698 | 25.84626315 | 2.756266171  | 1.46E-06 | 7.86E-06 |
| St6gal2    | 62 | 58.78264124 | 55.32210405 | -3.46053719  | 1.49E-06 | 7.99E-06 |
| Mmp15      | 83 | 3.343769966 | 3.040321273 | -0.303448693 | 1.50E-06 | 8.06E-06 |
| Trpd52l3   | 2  | 69.69193548 | 55.59835645 | -14.09357904 | 1.61E-06 | 8.62E-06 |
| Col5a3     | 20 | 9.225381954 | 6.681665396 | -2.543716558 | 1.62E-06 | 8.70E-06 |
| Tril       | 61 | 24.24826852 | 20.6865877  | -3.561680823 | 1.62E-06 | 8.71E-06 |
| Nccrp1     | 3  | 40.23778154 | 53.05688829 | 12.81910675  | 1.64E-06 | 8.78E-06 |
| 330592l03R | 1  | 71.42857143 | 30.76923077 | -40.65934066 | 1.65E-06 | 8.84E-06 |
| Kpna7      | 3  | 82.67419962 | 71.89672844 | -10.77747118 | 1.66E-06 | 8.90E-06 |
| Tmem108    | 69 | 32.30236465 | 34.91527199 | 2.61290734   | 1.67E-06 | 8.94E-06 |
| Insm2      | 14 | 38.93422384 | 45.74669332 | 6.812469478  | 1.67E-06 | 8.95E-06 |
| Muc20      | 12 | 64.43966829 | 58.7415033  | -5.698164989 | 1.67E-06 | 8.95E-06 |
| Cacna2d2   | 64 | 15.7478535  | 13.7413707  | -2.006482799 | 1.68E-06 | 8.97E-06 |
| Saa1       | 1  | 52.38095238 | 28.07881773 | -24.30213465 | 1.68E-06 | 8.99E-06 |
| Endou      | 3  | 58.83023251 | 47.46323589 | -11.36699662 | 1.69E-06 | 9.02E-06 |
| Entpd2     | 24 | 4.537656884 | 2.953804144 | -1.583852741 | 1.71E-06 | 9.13E-06 |
| Grip2      | 7  | 6.902393416 | 4.443845378 | -2.458548038 | 1.72E-06 | 9.21E-06 |
| Ltbp4      | 62 | 5.989253581 | 5.460307159 | -0.528946422 | 1.75E-06 | 9.35E-06 |

|            |     |             |             |              |          |          |
|------------|-----|-------------|-------------|--------------|----------|----------|
| Nradd      | 21  | 44.3307064  | 47.95370715 | 3.623000752  | 1.76E-06 | 9.39E-06 |
| Cys1       | 3   | 9.749724972 | 15.89532749 | 6.145602519  | 1.77E-06 | 9.44E-06 |
| Gypc       | 18  | 12.1941958  | 15.28425331 | 3.090057511  | 1.83E-06 | 9.79E-06 |
| Tmsb4x     | 3   | 19.85815603 | 8.980520733 | -10.8776353  | 1.84E-06 | 9.80E-06 |
| Hes7       | 10  | 65.56489115 | 70.95015243 | 5.385261278  | 1.85E-06 | 9.87E-06 |
| Gpx1       | 2   | 39.52466598 | 22.44080146 | -17.08386452 | 1.89E-06 | 1.01E-05 |
| Slc25a48   | 22  | 7.651133281 | 4.333116568 | -3.318016713 | 1.92E-06 | 1.02E-05 |
| Epha4      | 34  | 2.930205028 | 1.994331238 | -0.93587379  | 1.93E-06 | 1.03E-05 |
| '00125H03F | 2   | 59.50721775 | 69.40729936 | 9.900081609  | 1.94E-06 | 1.03E-05 |
| Adamts19   | 71  | 45.21538409 | 47.39771429 | 2.182330196  | 1.96E-06 | 1.04E-05 |
| '30017C20F | 3   | 85.84070796 | 69.33298365 | -16.50772431 | 1.99E-06 | 1.06E-05 |
| Rbm41      | 13  | 18.74523014 | 13.45581608 | -5.289414066 | 2.02E-06 | 1.07E-05 |
| Slc22a4    | 29  | 2.175225798 | 1.322391239 | -0.852834559 | 2.02E-06 | 1.07E-05 |
| Hoxaas3    | 10  | 60.15263501 | 52.52563935 | -7.626995668 | 2.02E-06 | 1.07E-05 |
| !30426J06R | 4   | 95.70619098 | 91.01344328 | -4.6927477   | 2.05E-06 | 1.09E-05 |
| Cdo1       | 39  | 51.62595648 | 54.92668758 | 3.300731104  | 2.10E-06 | 1.11E-05 |
| Tomm40l    | 5   | 9.553891829 | 3.45710223  | -6.096789599 | 2.10E-06 | 1.12E-05 |
| Ripk4      | 56  | 2.764553287 | 1.861784996 | -0.902768291 | 2.11E-06 | 1.12E-05 |
| Gja4       | 20  | 3.987129676 | 2.542454626 | -1.444675051 | 2.13E-06 | 1.13E-05 |
| Lgr5       | 26  | 3.363983658 | 2.240466011 | -1.123517647 | 2.16E-06 | 1.14E-05 |
| Zar1       | 17  | 51.91853893 | 55.85158625 | 3.933047325  | 2.16E-06 | 1.14E-05 |
| Adamts3    | 35  | 23.76961905 | 27.47363904 | 3.704019991  | 2.19E-06 | 1.16E-05 |
| Kdf1       | 64  | 12.11638534 | 11.29685544 | -0.819529901 | 2.26E-06 | 1.20E-05 |
| Tsc22d3    | 48  | 23.22204808 | 20.47806218 | -2.743985901 | 2.28E-06 | 1.21E-05 |
| !00005B03F | 4   | 87.272479   | 82.03171315 | -5.240765854 | 2.28E-06 | 1.21E-05 |
| Gm14124    | 1   | 59.34065934 | 35.32338308 | -24.01727626 | 2.29E-06 | 1.21E-05 |
| Zbtb7c     | 108 | 4.603857484 | 4.043675267 | -0.560182217 | 2.35E-06 | 1.24E-05 |
| Smarca1    | 7   | 24.40495481 | 17.2972359  | -7.107718919 | 2.36E-06 | 1.25E-05 |
| !30111H07F | 2   | 79.62962963 | 50.16354445 | -29.46608518 | 2.39E-06 | 1.26E-05 |
| Nhsl2      | 46  | 20.44684784 | 25.12957169 | 4.682723848  | 2.42E-06 | 1.28E-05 |
| Agtr1a     | 13  | 11.14717203 | 14.59224759 | 3.445075561  | 2.42E-06 | 1.28E-05 |
| Stbd1      | 18  | 4.361472835 | 2.642693531 | -1.718779304 | 2.43E-06 | 1.28E-05 |
| Olfr506    | 1   | 85.71428571 | 55.64516129 | -30.06912442 | 2.43E-06 | 1.28E-05 |
| Wfdc15a    | 4   | 84.85971325 | 72.05736008 | -12.80235317 | 2.47E-06 | 1.30E-05 |

|           |     |             |             |              |          |          |
|-----------|-----|-------------|-------------|--------------|----------|----------|
| Ldoc1l    | 24  | 48.83547324 | 43.34226022 | -5.493213015 | 2.49E-06 | 1.31E-05 |
| Tnni2     | 7   | 87.03825541 | 78.22610782 | -8.812147591 | 2.49E-06 | 1.31E-05 |
| 30090E17F | 20  | 3.207212891 | 1.96411107  | -1.243101821 | 2.59E-06 | 1.36E-05 |
| Spp2      | 7   | 76.86450616 | 69.92887686 | -6.9356293   | 2.62E-06 | 1.38E-05 |
| Csf2ra    | 13  | 50.51398986 | 47.44620184 | -3.067788022 | 2.63E-06 | 1.38E-05 |
| Pck1      | 3   | 73.42834298 | 59.68526039 | -13.74308259 | 2.64E-06 | 1.39E-05 |
| Kcna6     | 9   | 46.02207626 | 39.63199059 | -6.39008567  | 2.66E-06 | 1.40E-05 |
| Igsf21    | 29  | 38.85063224 | 35.99071109 | -2.859921148 | 2.73E-06 | 1.43E-05 |
| Emx1      | 60  | 12.63873577 | 15.62565254 | 2.986916767  | 2.74E-06 | 1.44E-05 |
| Fmr1      | 61  | 20.60661608 | 18.03991106 | -2.566705022 | 2.76E-06 | 1.45E-05 |
| Msc       | 29  | 37.48108859 | 42.1598536  | 4.678765005  | 2.81E-06 | 1.48E-05 |
| Arpin     | 26  | 4.04318938  | 2.849178624 | -1.194010755 | 2.83E-06 | 1.48E-05 |
| Rpl39     | 12  | 25.97154141 | 18.64427949 | -7.327261923 | 2.84E-06 | 1.49E-05 |
| Sh3d21    | 25  | 2.363565233 | 1.109687349 | -1.253877884 | 2.86E-06 | 1.50E-05 |
| Tro       | 5   | 35.11711103 | 44.34384353 | 9.226732497  | 2.89E-06 | 1.52E-05 |
| Krt80     | 3   | 22.63021896 | 12.68060958 | -9.94960938  | 2.97E-06 | 1.56E-05 |
| 30406D18F | 3   | 76.12599729 | 64.38605466 | -11.73994263 | 2.98E-06 | 1.57E-05 |
| Rln3      | 15  | 62.5843144  | 56.25989624 | -6.324418155 | 3.01E-06 | 1.58E-05 |
| Cldn11    | 26  | 28.83497301 | 24.82801368 | -4.006959328 | 3.02E-06 | 1.58E-05 |
| N4bp2l1   | 53  | 4.089628515 | 3.247499118 | -0.842129397 | 3.07E-06 | 1.61E-05 |
| 30423G03F | 8   | 79.02075994 | 70.73026269 | -8.290497257 | 3.08E-06 | 1.61E-05 |
| Rnf217    | 62  | 1.943920144 | 1.366545791 | -0.577374353 | 3.09E-06 | 1.62E-05 |
| 30515B02F | 1   | 59.15492958 | 24.27184466 | -34.88308492 | 3.12E-06 | 1.63E-05 |
| Adgrv1    | 13  | 14.39332288 | 9.915572409 | -4.477750473 | 3.16E-06 | 1.65E-05 |
| Matn2     | 32  | 1.837851371 | 1.018095858 | -0.819755513 | 3.20E-06 | 1.67E-05 |
| Akr1b10   | 4   | 7.671042219 | 2.851983957 | -4.819058263 | 3.31E-06 | 1.73E-05 |
| Cacng6    | 14  | 45.40373731 | 49.80076481 | 4.397027504  | 3.31E-06 | 1.73E-05 |
| Nkx2-4    | 113 | 36.14392543 | 38.50074315 | 2.35681772   | 3.33E-06 | 1.74E-05 |
| Gm16070   | 3   | 35.8504921  | 52.91858679 | 17.06809469  | 3.40E-06 | 1.78E-05 |
| Fzd8      | 53  | 2.367551879 | 1.38128611  | -0.986265769 | 3.41E-06 | 1.78E-05 |
| Nynrin    | 12  | 9.91526966  | 7.40638073  | -2.50888893  | 3.42E-06 | 1.78E-05 |
| Sgk2      | 6   | 45.01246444 | 30.36239516 | -14.65006928 | 3.48E-06 | 1.82E-05 |
| Ptpn5     | 14  | 4.109690011 | 6.714000602 | 2.60431059   | 3.52E-06 | 1.83E-05 |
| Hykk      | 6   | 5.384140138 | 2.87680937  | -2.507330767 | 3.73E-06 | 1.94E-05 |

|            |     |             |             |              |          |          |
|------------|-----|-------------|-------------|--------------|----------|----------|
| Fam78b     | 135 | 2.493018668 | 1.762498387 | -0.730520282 | 3.87E-06 | 2.02E-05 |
| Mmp16      | 26  | 51.10935276 | 54.03192574 | 2.922572988  | 3.87E-06 | 2.02E-05 |
| Lsr        | 70  | 5.384058329 | 4.191722617 | -1.192335712 | 3.87E-06 | 2.02E-05 |
| Olfm4      | 1   | 60.18518519 | 31.29251701 | -28.89266818 | 3.89E-06 | 2.03E-05 |
| Gm19402    | 4   | 58.77007521 | 45.03415803 | -13.73591718 | 3.89E-06 | 2.03E-05 |
| Trpc5      | 22  | 56.07730713 | 60.12966669 | 4.052359566  | 3.90E-06 | 2.03E-05 |
| Ptgs1      | 15  | 4.155346291 | 7.519574599 | 3.364228308  | 3.92E-06 | 2.04E-05 |
| Lrrc38     | 49  | 54.70337975 | 57.10164811 | 2.398268352  | 3.93E-06 | 2.04E-05 |
| Sbpl       | 1   | 84.67741935 | 67.62589928 | -17.05152007 | 4.02E-06 | 2.09E-05 |
| Panx2      | 52  | 9.096308921 | 8.066332551 | -1.02997637  | 4.13E-06 | 2.14E-05 |
| Mpv17l     | 33  | 7.718509905 | 6.043903659 | -1.674606246 | 4.19E-06 | 2.18E-05 |
| Srsf12     | 41  | 21.10539963 | 24.96947928 | 3.864079649  | 4.20E-06 | 2.18E-05 |
| Shroom4    | 36  | 16.03288184 | 13.00594977 | -3.026932075 | 4.23E-06 | 2.20E-05 |
| Mocs3      | 83  | 2.47853739  | 1.729428345 | -0.749109046 | 4.28E-06 | 2.22E-05 |
| Nckap5l    | 23  | 4.189669259 | 6.457085661 | 2.267416402  | 4.36E-06 | 2.26E-05 |
| Robo3      | 15  | 11.58083898 | 15.82136993 | 4.240530952  | 4.43E-06 | 2.29E-05 |
| Pcdhb3     | 2   | 76.5625     | 61.03286385 | -15.52963615 | 4.47E-06 | 2.32E-05 |
| Gm21221    | 3   | 70.32050283 | 54.43091431 | -15.88958852 | 4.55E-06 | 2.36E-05 |
| Gng8       | 19  | 17.36425784 | 13.34465924 | -4.019598595 | 4.57E-06 | 2.36E-05 |
| Trim72     | 6   | 52.55114258 | 45.02920812 | -7.521934465 | 4.57E-06 | 2.37E-05 |
| Arhgef6    | 2   | 50          | 27.72277228 | -22.27722772 | 4.62E-06 | 2.39E-05 |
| Syne3      | 32  | 5.666273701 | 2.8610402   | -2.805233501 | 4.63E-06 | 2.40E-05 |
| Etnppl     | 2   | 13.85526115 | 7.262376238 | -6.592884917 | 4.76E-06 | 2.46E-05 |
| Gm10046    | 6   | 10.4426254  | 18.52737484 | 8.084749437  | 4.89E-06 | 2.53E-05 |
| Foxa2      | 52  | 5.271452237 | 4.347014978 | -0.924437259 | 4.89E-06 | 2.53E-05 |
| Lamc2      | 21  | 3.241492748 | 2.04804294  | -1.193449808 | 4.90E-06 | 2.53E-05 |
| I30520P13F | 2   | 51.61059981 | 33.39355616 | -18.21704365 | 4.93E-06 | 2.54E-05 |
| Gsx2       | 28  | 27.2192728  | 31.29598901 | 4.076716208  | 5.02E-06 | 2.59E-05 |
| Cd81       | 13  | 4.393660816 | 1.454567874 | -2.939092942 | 5.02E-06 | 2.59E-05 |
| Olfml3     | 1   | 15.31531532 | 25.89820359 | 10.58288828  | 5.05E-06 | 2.60E-05 |
| I30507C01F | 9   | 56.31627799 | 63.79528235 | 7.479004364  | 5.06E-06 | 2.61E-05 |
| Prرت4      | 62  | 4.949480853 | 3.907821171 | -1.041659682 | 5.07E-06 | 2.62E-05 |
| Ifitm6     | 3   | 72.86669707 | 55.70473347 | -17.1619636  | 5.09E-06 | 2.62E-05 |
| Kif26a     | 32  | 9.017761911 | 7.366980538 | -1.650781373 | 5.09E-06 | 2.62E-05 |

|            |     |             |             |              |          |          |
|------------|-----|-------------|-------------|--------------|----------|----------|
| Gpr182     | 3   | 91.23258784 | 77.64944901 | -13.58313883 | 5.16E-06 | 2.66E-05 |
| Sorcs2     | 77  | 3.367651424 | 2.36127633  | -1.006375093 | 5.33E-06 | 2.74E-05 |
| Rab3c      | 17  | 24.86472165 | 21.75830309 | -3.10641856  | 5.37E-06 | 2.76E-05 |
| Casp7      | 23  | 2.363500156 | 1.334120863 | -1.029379293 | 5.43E-06 | 2.79E-05 |
| Dmtn       | 57  | 23.5800712  | 22.05717576 | -1.522895432 | 5.46E-06 | 2.81E-05 |
| Spata20    | 12  | 94.78913834 | 90.93841864 | -3.850719707 | 5.48E-06 | 2.81E-05 |
| Adck1      | 11  | 2.06828276  | 0.808189427 | -1.260093333 | 5.51E-06 | 2.83E-05 |
| Sgk1       | 112 | 13.65395334 | 11.20662723 | -2.447326109 | 5.52E-06 | 2.84E-05 |
| Sgk3       | 129 | 3.63806636  | 3.202495967 | -0.435570394 | 5.59E-06 | 2.87E-05 |
| Ndufa13    | 73  | 2.66069018  | 1.774189175 | -0.886501005 | 5.59E-06 | 2.87E-05 |
| Syt1       | 16  | 47.09460411 | 54.32960561 | 7.235001498  | 5.60E-06 | 2.88E-05 |
| Prodh      | 15  | 6.435944429 | 3.444536451 | -2.991407978 | 5.63E-06 | 2.89E-05 |
| Asl        | 9   | 27.83534652 | 21.13649046 | -6.698856056 | 5.69E-06 | 2.92E-05 |
| Acvr11     | 7   | 18.63354037 | 10.44552347 | -8.188016904 | 5.71E-06 | 2.92E-05 |
| Fgf9       | 38  | 1.830514821 | 4.988331976 | 3.157817156  | 5.77E-06 | 2.95E-05 |
| Col6a1     | 2   | 42.84219704 | 23.78482513 | -19.0573719  | 5.81E-06 | 2.98E-05 |
| Dnmbp      | 92  | 1.952218844 | 1.257643171 | -0.694575673 | 5.85E-06 | 3.00E-05 |
| 130570G19F | 22  | 63.70451646 | 66.18816281 | 2.483646352  | 5.88E-06 | 3.01E-05 |
| Sox18      | 18  | 22.10099672 | 30.64717975 | 8.546183032  | 5.88E-06 | 3.01E-05 |
| Ovol2      | 90  | 3.321717205 | 2.873912902 | -0.447804302 | 5.89E-06 | 3.01E-05 |
| Rtp2       | 6   | 84.42270205 | 76.78092046 | -7.641781596 | 5.90E-06 | 3.02E-05 |
| Trim2      | 47  | 9.673916883 | 7.508014414 | -2.165902469 | 5.92E-06 | 3.03E-05 |
| Calcoco2   | 4   | 39.81706061 | 26.24252536 | -13.57453525 | 6.00E-06 | 3.06E-05 |
| Gphb5      | 3   | 75.80595985 | 61.8083149  | -13.99764495 | 6.02E-06 | 3.07E-05 |
| Adgrb2     | 95  | 8.5861312   | 7.466615888 | -1.119515311 | 6.15E-06 | 3.14E-05 |
| Slc44a2    | 12  | 27.0259649  | 22.34633618 | -4.679628723 | 6.18E-06 | 3.16E-05 |
| Spin4      | 19  | 20.47870333 | 16.09220204 | -4.38650129  | 6.19E-06 | 3.16E-05 |
| Kcnh4      | 45  | 24.88731282 | 28.58665322 | 3.699340401  | 6.23E-06 | 3.18E-05 |
| Tbx2       | 31  | 4.582252592 | 2.716628011 | -1.865624581 | 6.26E-06 | 3.19E-05 |
| Gm29766    | 28  | 94.03398423 | 91.56573154 | -2.468252685 | 6.33E-06 | 3.23E-05 |
| Orai3      | 18  | 1.423749282 | 2.381644282 | 0.957894999  | 6.34E-06 | 3.23E-05 |
| Spag6l     | 15  | 43.23391941 | 47.58169524 | 4.347775825  | 6.44E-06 | 3.28E-05 |
| Il22ra1    | 6   | 41.9462173  | 29.3687752  | -12.5774421  | 6.50E-06 | 3.31E-05 |
| Sybu       | 38  | 16.77433249 | 16.1977257  | -0.576606786 | 6.51E-06 | 3.31E-05 |

|            |     |             |             |              |          |          |
|------------|-----|-------------|-------------|--------------|----------|----------|
| Snca       | 9   | 11.01299772 | 6.937231146 | -4.07576657  | 6.51E-06 | 3.31E-05 |
| Cryba2     | 28  | 15.34364742 | 14.129249   | -1.214398427 | 6.57E-06 | 3.34E-05 |
| Tspan32    | 1   | 31.91489362 | 7.476635514 | -24.4382581  | 6.63E-06 | 3.37E-05 |
| Dsel       | 42  | 19.94105352 | 24.27458921 | 4.333535685  | 6.66E-06 | 3.39E-05 |
| Snap25     | 15  | 23.7980443  | 29.0622774  | 5.2642331    | 6.68E-06 | 3.39E-05 |
| Gm11992    | 16  | 3.110324879 | 1.824493143 | -1.285831736 | 6.68E-06 | 3.39E-05 |
| Piga       | 12  | 24.47646786 | 15.98223063 | -8.494237225 | 6.75E-06 | 3.43E-05 |
| Esr2       | 20  | 3.456450768 | 1.560324967 | -1.896125801 | 6.76E-06 | 3.43E-05 |
| Cux1       | 141 | 2.068586577 | 1.263240098 | -0.805346479 | 6.82E-06 | 3.46E-05 |
| Scarletltr | 3   | 39.36946452 | 28.39775503 | -10.97170949 | 6.91E-06 | 3.51E-05 |
| Pknx2      | 50  | 4.993245017 | 3.78254253  | -1.210702487 | 6.96E-06 | 3.53E-05 |
| Hnf4g      | 4   | 11.08647771 | 5.693983301 | -5.392494413 | 6.99E-06 | 3.54E-05 |
| Dll3       | 28  | 19.46440424 | 22.54502966 | 3.080625422  | 7.01E-06 | 3.55E-05 |
| Ccdc30     | 35  | 21.16906364 | 19.42485267 | -1.744210964 | 7.04E-06 | 3.57E-05 |
| Pcdhb2     | 7   | 31.11270895 | 20.99622552 | -10.11648343 | 7.04E-06 | 3.57E-05 |
| Dagla      | 45  | 2.004457175 | 1.421223621 | -0.583233553 | 7.07E-06 | 3.58E-05 |
| Ndufa4l2   | 1   | 16.10486891 | 31.68604651 | 15.5811776   | 7.09E-06 | 3.59E-05 |
| Tgfb3      | 7   | 5.979656535 | 3.054470117 | -2.925186418 | 7.20E-06 | 3.64E-05 |
| Cd2        | 1   | 82.90598291 | 56.14035088 | -26.76563203 | 7.52E-06 | 3.80E-05 |
| Cfap43     | 28  | 18.2019033  | 20.33021333 | 2.128310031  | 7.53E-06 | 3.81E-05 |
| Sacs       | 14  | 16.74478715 | 14.68181406 | -2.062973094 | 7.56E-06 | 3.82E-05 |
| Mmgt1      | 50  | 17.79326866 | 15.30238722 | -2.490881434 | 7.66E-06 | 3.87E-05 |
| Epn3       | 12  | 22.83372367 | 18.75978124 | -4.073942421 | 7.70E-06 | 3.89E-05 |
| Sema5a     | 23  | 48.35244226 | 51.8710624  | 3.518620131  | 7.74E-06 | 3.91E-05 |
| Tmeff2     | 37  | 4.768984043 | 7.337870664 | 2.56888662   | 7.77E-06 | 3.92E-05 |
| Tnfsf13b   | 4   | 39.68672375 | 48.53613662 | 8.84941287   | 7.80E-06 | 3.93E-05 |
| Il11ra1    | 13  | 2.76094301  | 1.70802953  | -1.052913479 | 7.80E-06 | 3.93E-05 |
| Slc3a1     | 6   | 94.47168401 | 88.1985532  | -6.273130808 | 7.81E-06 | 3.93E-05 |
| Prkag2     | 59  | 7.017444948 | 5.214029775 | -1.803415173 | 8.05E-06 | 4.05E-05 |
| Myog       | 2   | 84.36629149 | 67.65633238 | -16.70995911 | 8.09E-06 | 4.07E-05 |
| Sycn       | 9   | 89.92646205 | 84.05435241 | -5.872109644 | 8.29E-06 | 4.17E-05 |
| Cldn19     | 11  | 96.84921378 | 92.73030785 | -4.118905936 | 8.41E-06 | 4.23E-05 |
| Sgol2a     | 46  | 5.48417321  | 4.276006127 | -1.208167084 | 8.46E-06 | 4.26E-05 |
| Dctn1      | 17  | 14.70577854 | 11.72184177 | -2.983936769 | 8.63E-06 | 4.34E-05 |

|            |     |             |             |              |          |          |
|------------|-----|-------------|-------------|--------------|----------|----------|
| Cyr61      | 36  | 2.128468751 | 1.241644323 | -0.886824428 | 8.87E-06 | 4.46E-05 |
| Spock3     | 28  | 29.38273375 | 27.89782931 | -1.484904441 | 8.89E-06 | 4.47E-05 |
| Aebp2      | 102 | 5.989919195 | 5.131409845 | -0.85850935  | 8.90E-06 | 4.47E-05 |
| Prex2      | 50  | 43.13661542 | 44.75088811 | 1.614272696  | 8.92E-06 | 4.48E-05 |
| Mafb       | 74  | 46.17742819 | 44.27679347 | -1.900634729 | 9.07E-06 | 4.56E-05 |
| Eda        | 32  | 24.55591662 | 19.81944341 | -4.736473213 | 9.11E-06 | 4.57E-05 |
| Mospd3     | 29  | 3.220261444 | 1.92426622  | -1.295995224 | 9.17E-06 | 4.60E-05 |
| C1qb       | 3   | 58.14798117 | 43.38246158 | -14.76551959 | 9.25E-06 | 4.64E-05 |
| Proser2    | 49  | 2.31321004  | 1.600766335 | -0.712443705 | 9.39E-06 | 4.71E-05 |
| Tdrd1      | 30  | 84.40435901 | 82.08640261 | -2.317956401 | 9.40E-06 | 4.71E-05 |
| Ttc30a1    | 4   | 6.985957417 | 1.630252101 | -5.355705316 | 9.41E-06 | 4.72E-05 |
| Bdkrb1     | 2   | 95.77777778 | 88.27268565 | -7.505092131 | 9.47E-06 | 4.74E-05 |
| Chrna7     | 55  | 45.42021057 | 42.80286064 | -2.617349925 | 9.48E-06 | 4.75E-05 |
| Sox3       | 50  | 57.22876278 | 59.94772852 | 2.718965741  | 9.91E-06 | 4.96E-05 |
| Gm10872    | 4   | 71.41897997 | 78.39976399 | 6.980784022  | 1.00E-05 | 5.01E-05 |
| Gml2       | 5   | 96.57713645 | 92.14984182 | -4.427294629 | 1.01E-05 | 5.06E-05 |
| Gml        | 5   | 96.57713645 | 92.14984182 | -4.427294629 | 1.01E-05 | 5.06E-05 |
| Slc17a8    | 6   | 85.41713393 | 91.17286473 | 5.755730801  | 1.01E-05 | 5.06E-05 |
| Scg2       | 9   | 5.943750466 | 3.218552592 | -2.725197873 | 1.02E-05 | 5.09E-05 |
| Ninl       | 39  | 2.289856875 | 1.40934121  | -0.880515665 | 1.03E-05 | 5.15E-05 |
| Rasl10b    | 60  | 9.236376042 | 7.806105856 | -1.430270186 | 1.03E-05 | 5.16E-05 |
| !10420H20F | 10  | 85.99781564 | 78.3860586  | -7.611757033 | 1.04E-05 | 5.20E-05 |
| Rusc2      | 54  | 10.48748236 | 12.62008095 | 2.132598586  | 1.05E-05 | 5.26E-05 |
| Mir1231    | 8   | 92.21442537 | 88.74984492 | -3.464580451 | 1.06E-05 | 5.28E-05 |
| Espn       | 56  | 33.16160817 | 35.85123923 | 2.689631058  | 1.08E-05 | 5.40E-05 |
| F8a        | 21  | 18.49722502 | 14.25839638 | -4.238828644 | 1.10E-05 | 5.47E-05 |
| Sorcs1     | 77  | 52.0984229  | 54.21403637 | 2.115613473  | 1.10E-05 | 5.50E-05 |
| Aig1       | 60  | 1.814558703 | 1.285507413 | -0.52905129  | 1.12E-05 | 5.57E-05 |
| Yy2        | 18  | 89.71292242 | 92.82837622 | 3.115453803  | 1.12E-05 | 5.59E-05 |
| Gpx3       | 2   | 45.09803922 | 62.28149036 | 17.18345114  | 1.14E-05 | 5.68E-05 |
| Rab39b     | 3   | 27.10075348 | 17.65902489 | -9.441728593 | 1.17E-05 | 5.81E-05 |
| Slc10a4    | 35  | 18.10689857 | 16.98441083 | -1.122487742 | 1.17E-05 | 5.83E-05 |
| Pparg      | 85  | 4.379400186 | 3.514601043 | -0.864799143 | 1.20E-05 | 5.95E-05 |
| Zar1l      | 4   | 48.77045357 | 40.62590037 | -8.144553206 | 1.21E-05 | 6.01E-05 |

|            |     |             |             |              |          |          |
|------------|-----|-------------|-------------|--------------|----------|----------|
| Zfp772     | 2   | 6.036004996 | 0.9291559   | -5.106849096 | 1.21E-05 | 6.01E-05 |
| Uprt       | 14  | 18.84409608 | 14.83279492 | -4.011301164 | 1.21E-05 | 6.03E-05 |
| Tmem173    | 5   | 86.20982861 | 78.54112798 | -7.668700629 | 1.26E-05 | 6.26E-05 |
| Fxyd7      | 9   | 23.6950847  | 18.95062205 | -4.744462646 | 1.26E-05 | 6.27E-05 |
| Gm20751    | 9   | 93.24340294 | 88.76270555 | -4.480697385 | 1.26E-05 | 6.28E-05 |
| '00025C18F | 1   | 74.3315508  | 53.84615385 | -20.48539696 | 1.27E-05 | 6.28E-05 |
| Rab9       | 31  | 16.43536592 | 13.93306813 | -2.502297787 | 1.29E-05 | 6.40E-05 |
| Ranbp3l    | 7   | 48.50516734 | 40.00007806 | -8.505089278 | 1.29E-05 | 6.40E-05 |
| Tceanc     | 39  | 17.56164572 | 14.20504639 | -3.356599324 | 1.30E-05 | 6.43E-05 |
| Stx3       | 18  | 3.894916815 | 1.663289771 | -2.231627044 | 1.30E-05 | 6.43E-05 |
| Slc19a3    | 7   | 8.178222771 | 4.541721605 | -3.636501166 | 1.30E-05 | 6.46E-05 |
| Mir7236    | 32  | 16.3351207  | 14.80408745 | -1.53103324  | 1.31E-05 | 6.47E-05 |
| Hs3st6     | 58  | 6.342193433 | 5.531882654 | -0.810310779 | 1.31E-05 | 6.50E-05 |
| Col4a4     | 9   | 10.93484784 | 6.696189248 | -4.238658591 | 1.32E-05 | 6.51E-05 |
| 110034G01F | 58  | 1.564677511 | 1.092464443 | -0.472213068 | 1.36E-05 | 6.71E-05 |
| Rab40b     | 45  | 19.84124384 | 18.34980534 | -1.491438505 | 1.36E-05 | 6.73E-05 |
| Tfe3       | 9   | 28.54051163 | 18.56751596 | -9.972995672 | 1.37E-05 | 6.76E-05 |
| Sh3bp2     | 36  | 13.46332449 | 12.17902    | -1.284304492 | 1.37E-05 | 6.76E-05 |
| B4galt6    | 82  | 1.558345186 | 0.991383564 | -0.566961622 | 1.38E-05 | 6.80E-05 |
| Asprv1     | 9   | 80.93964859 | 71.25430488 | -9.685343711 | 1.38E-05 | 6.82E-05 |
| Arpc3      | 33  | 1.76537829  | 0.952902359 | -0.812475931 | 1.39E-05 | 6.84E-05 |
| Myo3b      | 4   | 79.69065111 | 70.92354903 | -8.767102078 | 1.42E-05 | 6.98E-05 |
| H60b       | 4   | 10.19617118 | 6.693501989 | -3.502669189 | 1.42E-05 | 7.00E-05 |
| Fbxw19     | 2   | 46.01722049 | 31.50831625 | -14.50890425 | 1.43E-05 | 7.05E-05 |
| Lhx9       | 42  | 49.57102363 | 53.27540902 | 3.704385391  | 1.45E-05 | 7.16E-05 |
| Slc16a3    | 52  | 10.22723457 | 12.5321193  | 2.304884733  | 1.46E-05 | 7.20E-05 |
| Slc8a3     | 41  | 21.11391983 | 19.91630908 | -1.197610749 | 1.48E-05 | 7.30E-05 |
| Rgs9bp     | 48  | 1.91819936  | 3.683303523 | 1.765104164  | 1.49E-05 | 7.35E-05 |
| Phactr2    | 118 | 6.762149951 | 6.951172784 | 0.189022833  | 1.49E-05 | 7.35E-05 |
| Ttc23l     | 8   | 70.16956948 | 73.59765564 | 3.428086168  | 1.50E-05 | 7.37E-05 |
| Scarf2     | 96  | 5.677770357 | 5.58435797  | -0.093412387 | 1.50E-05 | 7.39E-05 |
| Pbx4       | 8   | 7.263659422 | 4.489008217 | -2.774651204 | 1.50E-05 | 7.40E-05 |
| Nipsnap1   | 13  | 2.13160002  | 0.833204328 | -1.298395692 | 1.51E-05 | 7.41E-05 |
| Larp6      | 68  | 7.698061839 | 9.722004535 | 2.023942695  | 1.51E-05 | 7.42E-05 |



|           |     |             |             |              |          |          |
|-----------|-----|-------------|-------------|--------------|----------|----------|
| Efemp1    | 9   | 51.56013781 | 45.78834909 | -5.77178872  | 1.52E-05 | 7.45E-05 |
| 00030M09F | 4   | 90.15260401 | 81.95876354 | -8.193840476 | 1.54E-05 | 7.54E-05 |
| Olig2     | 6   | 12.01686982 | 18.30254978 | 6.285679962  | 1.56E-05 | 7.65E-05 |
| Msrb2     | 3   | 8.73655914  | 3.297637795 | -5.438921345 | 1.57E-05 | 7.71E-05 |
| Npr2      | 99  | 18.85478563 | 18.77221361 | -0.082572023 | 1.57E-05 | 7.72E-05 |
| Diras1    | 15  | 4.919224137 | 3.013601352 | -1.905622785 | 1.58E-05 | 7.76E-05 |
| 30430L01F | 16  | 3.398664272 | 1.421935809 | -1.976728463 | 1.58E-05 | 7.76E-05 |
| Mir34c    | 9   | 5.834418392 | 1.69698389  | -4.137434502 | 1.59E-05 | 7.78E-05 |
| Rab37     | 49  | 10.27009499 | 9.282371863 | -0.987723123 | 1.60E-05 | 7.83E-05 |
| Nkx2-3    | 23  | 37.62058815 | 40.85733038 | 3.236742232  | 1.62E-05 | 7.94E-05 |
| Gabrr3    | 1   | 97.36842105 | 75.55555556 | -21.8128655  | 1.63E-05 | 8.00E-05 |
| Ly6k      | 2   | 39.34168383 | 55.19041142 | 15.8487276   | 1.64E-05 | 8.01E-05 |
| Boc       | 28  | 30.44219718 | 30.04391972 | -0.398277455 | 1.64E-05 | 8.03E-05 |
| Dnajc15   | 37  | 2.413293362 | 1.562161852 | -0.85113151  | 1.67E-05 | 8.18E-05 |
| Scpep1os  | 1   | 85.24590164 | 62.73291925 | -22.51298238 | 1.69E-05 | 8.26E-05 |
| Tcp11l1   | 104 | 2.32089413  | 1.692231852 | -0.628662278 | 1.69E-05 | 8.28E-05 |
| Arap1     | 49  | 7.365248978 | 7.848370392 | 0.483121414  | 1.70E-05 | 8.32E-05 |
| Gm7367    | 42  | 1.130613822 | 1.727973416 | 0.597359594  | 1.73E-05 | 8.46E-05 |
| 30478L05F | 2   | 87.79761905 | 74.69512195 | -13.1024971  | 1.73E-05 | 8.46E-05 |
| Adamts4   | 1   | 78.0141844  | 55.30726257 | -22.70692183 | 1.74E-05 | 8.52E-05 |
| Tcf7      | 96  | 9.114581917 | 8.41350112  | -0.701080797 | 1.75E-05 | 8.54E-05 |
| Myh10     | 16  | 12.92250344 | 9.533602461 | -3.388900977 | 1.78E-05 | 8.67E-05 |
| Uchl1     | 11  | 22.98077476 | 29.02922819 | 6.048453435  | 1.78E-05 | 8.68E-05 |
| Gm15179   | 2   | 62.92134831 | 42.41557734 | -20.50577097 | 1.78E-05 | 8.68E-05 |
| Mecom     | 29  | 23.40600446 | 24.03299851 | 0.626994053  | 1.78E-05 | 8.69E-05 |
| Slc35a2   | 28  | 13.82505062 | 10.51970146 | -3.305349163 | 1.80E-05 | 8.79E-05 |
| Pou2f3    | 24  | 14.13079475 | 20.90806527 | 6.777270521  | 1.81E-05 | 8.80E-05 |
| Hlf       | 28  | 3.97126361  | 2.676903435 | -1.294360175 | 1.83E-05 | 8.90E-05 |
| Ccdc155   | 20  | 7.292782788 | 5.215502137 | -2.077280651 | 1.83E-05 | 8.90E-05 |
| Hist1h2aa | 7   | 95.81779881 | 93.50532495 | -2.312473858 | 1.83E-05 | 8.90E-05 |
| Spred3    | 7   | 17.61327091 | 11.60176041 | -6.011510497 | 1.86E-05 | 9.06E-05 |
| Ak4       | 97  | 2.592855946 | 1.902824618 | -0.690031328 | 1.86E-05 | 9.06E-05 |
| Zim1      | 7   | 39.52691184 | 33.20012063 | -6.326791211 | 1.88E-05 | 9.15E-05 |
| Fcho1     | 30  | 5.422055673 | 3.64375925  | -1.778296423 | 1.90E-05 | 9.22E-05 |

|            |     |             |             |              |          |             |
|------------|-----|-------------|-------------|--------------|----------|-------------|
| Taar4      | 5   | 97.51673958 | 93.08407381 | -4.432665765 | 1.90E-05 | 9.23E-05    |
| I10002D06F | 2   | 92.55102041 | 82.03463203 | -10.51638837 | 1.91E-05 | 9.27E-05    |
| Grhl3      | 15  | 5.822864438 | 8.920705244 | 3.097840806  | 1.91E-05 | 9.27E-05    |
| I32702P03F | 8   | 91.61798417 | 87.54233656 | -4.075647608 | 1.92E-05 | 9.31E-05    |
| Ctsw       | 4   | 46.83155322 | 36.18216585 | -10.64938737 | 1.92E-05 | 9.33E-05    |
| Cygb       | 60  | 8.656990047 | 10.2453445  | 1.588354454  | 1.93E-05 | 9.38E-05    |
| Crip3      | 1   | 22.58064516 | 5.333333333 | -17.24731183 | 1.94E-05 | 9.42E-05    |
| Cdv3       | 148 | 5.897078794 | 6.462939385 | 0.565860591  | 1.97E-05 | 9.55E-05    |
| Spef2      | 4   | 35.0571608  | 26.73715508 | -8.320005722 | 1.99E-05 | 9.63E-05    |
| Zfp61      | 5   | 10.86956522 | 2.307692308 | -8.56187291  | 1.99E-05 | 9.65E-05    |
| Cc2d2a     | 5   | 10.82108367 | 3.399089805 | -7.421993865 | 2.01E-05 | 9.74E-05    |
| Alg13      | 23  | 10.5269045  | 7.218003931 | -3.308900567 | 2.04E-05 | 9.89E-05    |
| Lhx1       | 8   | 51.89792667 | 59.1414106  | 7.24348393   | 2.04E-05 | 9.89E-05    |
| Sh2d4b     | 4   | 95.09569446 | 88.66557371 | -6.430120749 | 2.04E-05 | 9.89E-05    |
| Gatsl3     | 50  | 14.72182604 | 14.28125746 | -0.440568574 | 2.05E-05 | 9.90E-05    |
| Scube3     | 109 | 8.733472808 | 8.892629144 | 0.159156336  | 2.08E-05 | 0.000100669 |
| Oxct2b     | 8   | 42.64161735 | 50.37489881 | 7.733281464  | 2.11E-05 | 0.000101922 |
| Btbd18     | 22  | 95.97203774 | 94.09580126 | -1.876236482 | 2.14E-05 | 0.000103166 |
| Slc26a10   | 14  | 15.79463743 | 12.10768664 | -3.686950789 | 2.14E-05 | 0.000103395 |
| Lemd2      | 71  | 7.23939683  | 5.464590415 | -1.774806415 | 2.14E-05 | 0.000103525 |
| Tcf4       | 39  | 54.93373757 | 58.19902215 | 3.265284583  | 2.15E-05 | 0.000104018 |
| Cdk5r1     | 134 | 1.880614834 | 1.242551497 | -0.638063338 | 2.17E-05 | 0.000104834 |
| Hipk1      | 75  | 1.530832218 | 1.215454655 | -0.315377563 | 2.18E-05 | 0.000105394 |
| Mpo        | 1   | 97.22222222 | 84.21052632 | -13.01169591 | 2.19E-05 | 0.000105545 |
| Acvr1c     | 50  | 12.11412751 | 10.06867282 | -2.045454697 | 2.20E-05 | 0.000106256 |
| Vstm2a     | 8   | 37.57954944 | 30.28045335 | -7.299096093 | 2.23E-05 | 0.000107446 |
| Nagpa      | 72  | 1.608180491 | 1.053482052 | -0.554698439 | 2.23E-05 | 0.000107458 |
| Aurkc      | 2   | 55.82191781 | 39.13043478 | -16.69148303 | 2.24E-05 | 0.000107749 |
| Vill       | 5   | 34.08788802 | 26.15630217 | -7.931585845 | 2.24E-05 | 0.000107911 |
| I30162012F | 59  | 1.766555472 | 1.216102483 | -0.550452989 | 2.27E-05 | 0.000109037 |
| Npb        | 11  | 9.959067123 | 6.891676461 | -3.067390662 | 2.30E-05 | 0.000110439 |
| Kcnh8      | 41  | 40.02374059 | 42.5519093  | 2.528168708  | 2.31E-05 | 0.000111241 |
| Myo16      | 9   | 35.12674275 | 42.06191353 | 6.935170778  | 2.33E-05 | 0.000112206 |
| Mt2        | 37  | 3.144657622 | 2.300034144 | -0.844623479 | 2.41E-05 | 0.000115862 |

|            |     |             |             |              |          |             |
|------------|-----|-------------|-------------|--------------|----------|-------------|
| Aplp1      | 26  | 21.294363   | 24.55419618 | 3.259833172  | 2.43E-05 | 0.000116972 |
| Cd6        | 7   | 71.23554385 | 64.2691118  | -6.966432055 | 2.44E-05 | 0.000117121 |
| C77080     | 109 | 4.664745828 | 4.039190162 | -0.625555666 | 2.45E-05 | 0.000117445 |
| Trp53cor1  | 6   | 15.15455809 | 11.29595337 | -3.858604724 | 2.45E-05 | 0.000117565 |
| Kcnc4      | 96  | 12.89114247 | 14.97158512 | 2.080442652  | 2.46E-05 | 0.000117859 |
| Casq2      | 7   | 56.41138443 | 50.28713551 | -6.124248911 | 2.46E-05 | 0.000117911 |
| Rpl39l     | 15  | 90.08978771 | 82.13455538 | -7.955232336 | 2.47E-05 | 0.000118245 |
| Bcorl1     | 42  | 16.14650076 | 13.60618107 | -2.540319682 | 2.47E-05 | 0.000118245 |
| Wdr8       | 49  | 3.527022585 | 2.299722432 | -1.227300152 | 2.48E-05 | 0.000118892 |
| Kif26b     | 83  | 4.424045731 | 3.41814654  | -1.005899191 | 2.52E-05 | 0.000120843 |
| Mkrn3      | 28  | 57.01517932 | 59.89281741 | 2.877638091  | 2.53E-05 | 0.000120949 |
| 30017L17R  | 4   | 83.25804559 | 70.67516147 | -12.58288412 | 2.54E-05 | 0.000121825 |
| Hpcal4     | 2   | 10.43917264 | 4.023990983 | -6.415181661 | 2.55E-05 | 0.000121986 |
| 30082N09F  | 5   | 95.74831423 | 86.78228986 | -8.966024377 | 2.56E-05 | 0.00012226  |
| 330102I10R | 11  | 92.26305852 | 89.226259   | -3.036799514 | 2.57E-05 | 0.000122935 |
| Selm       | 7   | 8.817015817 | 4.120631166 | -4.696384651 | 2.59E-05 | 0.00012362  |
| Prkcb      | 52  | 47.85144391 | 51.45178342 | 3.600339514  | 2.59E-05 | 0.000124016 |
| 00092D14F  | 4   | 39.33394075 | 47.69534324 | 8.361402484  | 2.62E-05 | 0.000125223 |
| Bnc1       | 110 | 41.08486093 | 42.29852454 | 1.213663604  | 2.63E-05 | 0.000125765 |
| Foxo6      | 153 | 2.908586386 | 2.074880018 | -0.833706367 | 2.64E-05 | 0.000125828 |
| Nr5a1      | 5   | 90.06913785 | 80.78232932 | -9.286808532 | 2.66E-05 | 0.000126933 |
| Spata31d1a | 4   | 94.12301597 | 79.11270539 | -15.01031058 | 2.72E-05 | 0.000129993 |
| Trf        | 10  | 15.90797781 | 11.76080839 | -4.147169417 | 2.76E-05 | 0.000131548 |
| Kif4       | 14  | 19.51973899 | 14.48176816 | -5.037970836 | 2.82E-05 | 0.000134701 |
| Btbd11     | 54  | 6.640984594 | 5.046617401 | -1.594367193 | 2.84E-05 | 0.000135324 |
| Cntn4      | 9   | 33.319133   | 40.01120264 | 6.692069636  | 2.90E-05 | 0.000138315 |
| Cpm        | 30  | 4.307249014 | 3.930158552 | -0.377090463 | 2.91E-05 | 0.000138878 |
| Fads6      | 19  | 6.473810929 | 4.561930083 | -1.911880847 | 2.93E-05 | 0.000139609 |
| Mecp2      | 14  | 19.08047909 | 14.58147439 | -4.499004701 | 2.95E-05 | 0.000140311 |
| Pgbd1      | 6   | 7.414859528 | 3.113419309 | -4.301440219 | 2.99E-05 | 0.00014231  |
| Cct5       | 19  | 0.633053413 | 1.83191405  | 1.198860638  | 3.00E-05 | 0.000142553 |
| Tll7       | 19  | 2.149453917 | 1.636480468 | -0.512973449 | 3.00E-05 | 0.000142625 |
| Disc1      | 56  | 10.90326859 | 12.62012852 | 1.716859935  | 3.00E-05 | 0.000142625 |
| Thoc2      | 33  | 18.62877333 | 16.18664804 | -2.44212529  | 3.04E-05 | 0.000144478 |

|            |    |             |             |              |          |             |
|------------|----|-------------|-------------|--------------|----------|-------------|
| i30036O11F | 5  | 13.20599922 | 5.62462744  | -7.581371784 | 3.05E-05 | 0.000145164 |
| 31431F19F  | 2  | 86          | 69.375      | -16.625      | 3.06E-05 | 0.000145244 |
| Sat1       | 30 | 19.63280497 | 16.47520915 | -3.157595819 | 3.06E-05 | 0.000145316 |
| Grb7       | 6  | 11.59935112 | 5.787547033 | -5.81180409  | 3.06E-05 | 0.00014537  |
| Mir1895    | 21 | 3.446061152 | 1.931764275 | -1.514296876 | 3.07E-05 | 0.000145858 |
| Lnx1       | 3  | 88.62345384 | 77.27554938 | -11.34790446 | 3.10E-05 | 0.000146876 |
| Tmem229a   | 90 | 57.55320451 | 59.48446885 | 1.93126434   | 3.11E-05 | 0.000147624 |
| Myh4       | 3  | 54.35897436 | 37.89297068 | -16.46600368 | 3.15E-05 | 0.000149125 |
| Abcg8      | 6  | 12.84718967 | 7.303719427 | -5.543470238 | 3.23E-05 | 0.000153108 |
| Sox4       | 17 | 2.474611681 | 0.969659589 | -1.504952092 | 3.24E-05 | 0.000153387 |
| Adam33     | 14 | 16.53365235 | 13.55943058 | -2.974221772 | 3.24E-05 | 0.000153676 |
| Btg3       | 33 | 6.707026054 | 5.101832841 | -1.605193213 | 3.25E-05 | 0.00015377  |
| Ada        | 40 | 2.707527369 | 1.931742142 | -0.775785226 | 3.27E-05 | 0.000154782 |
| Ano7       | 8  | 56.01142939 | 49.10253401 | -6.908895383 | 3.29E-05 | 0.000155614 |
| Col4a3     | 12 | 10.52324695 | 6.246860389 | -4.276386564 | 3.35E-05 | 0.000158392 |
| Ece2       | 45 | 14.12224525 | 12.94428003 | -1.17796522  | 3.39E-05 | 0.00016016  |
| Myadm      | 16 | 3.812884975 | 1.933929694 | -1.878955281 | 3.40E-05 | 0.000160513 |
| Tspan2     | 53 | 3.570070016 | 3.163686914 | -0.406383101 | 3.40E-05 | 0.000160529 |
| Theg       | 1  | 51.52838428 | 33.66336634 | -17.86501794 | 3.41E-05 | 0.000161245 |
| Maged1     | 2  | 24.67961165 | 10.08403361 | -14.59557804 | 3.41E-05 | 0.000161245 |
| S1pr5      | 25 | 9.607453402 | 9.20222856  | -0.405224842 | 3.44E-05 | 0.000162564 |
| Syt12      | 47 | 2.007353966 | 1.545702516 | -0.46165145  | 3.48E-05 | 0.000164054 |
| Tmc5       | 13 | 57.01709347 | 50.09076045 | -6.926333025 | 3.53E-05 | 0.000166709 |
| Wdr31      | 11 | 2.744671966 | 1.457575986 | -1.28709598  | 3.55E-05 | 0.00016753  |
| Kcnk6      | 60 | 8.196081375 | 8.197079102 | 0.000997727  | 3.58E-05 | 0.000168794 |
| Vcpkmt     | 45 | 24.02339026 | 21.45161143 | -2.57177883  | 3.59E-05 | 0.000169019 |
| Scarb1     | 11 | 12.8793463  | 7.552347766 | -5.326998531 | 3.61E-05 | 0.000170267 |
| Nfic       | 1  | 57.69230769 | 19.64285714 | -38.04945055 | 3.62E-05 | 0.000170528 |
| Slc35f3    | 64 | 9.468121838 | 10.96227193 | 1.494150088  | 3.62E-05 | 0.000170533 |
| Fkbp1b     | 51 | 3.389830918 | 2.038876087 | -1.350954832 | 3.63E-05 | 0.000171002 |
| Dlx1as     | 16 | 43.35721297 | 46.82930454 | 3.472091571  | 3.65E-05 | 0.000171557 |
| L10012L19F | 2  | 21.42857143 | 3.488372093 | -17.94019934 | 3.65E-05 | 0.000171625 |
| Ttc8       | 9  | 2.918775186 | 1.182970735 | -1.73580445  | 3.66E-05 | 0.000172044 |
| Slc25a43   | 24 | 20.4257228  | 16.25456058 | -4.171162223 | 3.70E-05 | 0.000173967 |

|            |     |             |             |              |          |             |
|------------|-----|-------------|-------------|--------------|----------|-------------|
| Folh1      | 4   | 63.8736614  | 53.08771561 | -10.78594579 | 3.78E-05 | 0.000177645 |
| Clint1     | 80  | 1.779856882 | 1.287997866 | -0.491859016 | 3.80E-05 | 0.000178589 |
| Exoc3l     | 7   | 60.88712106 | 70.70019528 | 9.813074211  | 3.84E-05 | 0.000180493 |
| Igfbp3     | 99  | 2.320115682 | 1.532588219 | -0.787527463 | 3.86E-05 | 0.000181133 |
| H2-T10     | 4   | 25.08679262 | 19.50110204 | -5.585690579 | 3.87E-05 | 0.000181495 |
| Cplx4      | 9   | 83.56979113 | 77.00977688 | -6.560014252 | 3.87E-05 | 0.000181516 |
| Rragd      | 13  | 11.2022714  | 8.456344998 | -2.745926399 | 3.88E-05 | 0.000181841 |
| Magea8     | 3   | 88.74154775 | 81.12012256 | -7.621425199 | 3.93E-05 | 0.00018417  |
| '00001P01F | 13  | 91.08793815 | 86.85522909 | -4.232709058 | 4.01E-05 | 0.000188058 |
| Gm14169    | 64  | 5.903911328 | 4.690743155 | -1.213168173 | 4.03E-05 | 0.000188968 |
| Slc1a7     | 2   | 87.96464646 | 72.56637168 | -15.39827478 | 4.08E-05 | 0.00019115  |
| Gfpt2      | 23  | 26.78277254 | 23.33380229 | -3.448970246 | 4.12E-05 | 0.000193031 |
| Hmcn1      | 21  | 19.93191815 | 24.6018392  | 4.669921049  | 4.13E-05 | 0.000193461 |
| Tspo       | 5   | 17.74227235 | 9.671431583 | -8.070840764 | 4.14E-05 | 0.000193561 |
| Tmem8b     | 28  | 2.6937143   | 1.680518791 | -1.01319551  | 4.14E-05 | 0.000193685 |
| Tmem179    | 13  | 29.13026947 | 36.81290739 | 7.682637923  | 4.18E-05 | 0.000195377 |
| Klf3       | 127 | 6.655544715 | 5.935611638 | -0.719933078 | 4.18E-05 | 0.000195377 |
| Csrp2      | 50  | 4.830588706 | 2.921402527 | -1.909186179 | 4.18E-05 | 0.000195562 |
| Dkk1       | 7   | 26.32501644 | 19.42295891 | -6.902057532 | 4.19E-05 | 0.000195756 |
| Stxbp6     | 49  | 2.024956118 | 1.370700441 | -0.654255677 | 4.19E-05 | 0.000195756 |
| Agk        | 37  | 2.38291146  | 1.719319899 | -0.663591561 | 4.22E-05 | 0.000197065 |
| Kl         | 30  | 18.97711189 | 17.6185604  | -1.358551497 | 4.24E-05 | 0.000197988 |
| Peg12      | 65  | 60.38815276 | 62.45885465 | 2.07070189   | 4.34E-05 | 0.000202782 |
| P2ry6      | 1   | 80          | 48.71794872 | -31.28205128 | 4.35E-05 | 0.000202805 |
| Mir328     | 5   | 95.35839167 | 88.10703048 | -7.251361187 | 4.41E-05 | 0.000205882 |
| Prkch      | 81  | 11.16435134 | 13.11208226 | 1.947730927  | 4.47E-05 | 0.000208502 |
| Ms4a15     | 4   | 95.82301038 | 90.0341058  | -5.788904577 | 4.50E-05 | 0.000209557 |
| Rasal1     | 63  | 6.236444228 | 5.756563712 | -0.479880516 | 4.50E-05 | 0.000209756 |
| Kctd15     | 13  | 13.05278307 | 9.245531485 | -3.807251587 | 4.53E-05 | 0.000211092 |
| Irgm1      | 9   | 3.991811629 | 2.139789537 | -1.852022092 | 4.55E-05 | 0.000211965 |
| Map1b      | 29  | 2.752205576 | 1.467008524 | -1.285197052 | 4.55E-05 | 0.000211975 |
| Pfkfb4     | 23  | 2.940519219 | 1.686643556 | -1.253875662 | 4.56E-05 | 0.000212417 |
| Hoxc6      | 8   | 19.66202861 | 15.14875845 | -4.513270165 | 4.58E-05 | 0.000213057 |
| Catal      | 1   | 28.97196262 | 16.18798956 | -12.78397306 | 4.60E-05 | 0.000214082 |

|             |    |             |             |              |          |             |
|-------------|----|-------------|-------------|--------------|----------|-------------|
| Cdcp1       | 5  | 13.15972222 | 4.941176471 | -8.218545752 | 4.61E-05 | 0.000214549 |
| Mir124a-1hg | 12 | 16.49116282 | 14.69501264 | -1.796150179 | 4.72E-05 | 0.000219341 |
| Vwa1        | 8  | 3.341548262 | 1.690240006 | -1.651308256 | 4.72E-05 | 0.000219424 |
| H2-K2       | 30 | 2.922606296 | 1.871988812 | -1.050617484 | 4.74E-05 | 0.000220318 |
| Creb3l3     | 5  | 33.07287094 | 23.45573585 | -9.617135091 | 4.81E-05 | 0.000223396 |
| Kctd14      | 20 | 6.406191656 | 4.880732473 | -1.525459182 | 4.95E-05 | 0.000229859 |
| Ctsh        | 10 | 3.4495286   | 1.408192812 | -2.041335788 | 5.01E-05 | 0.000232398 |
| Nipal4      | 14 | 20.54912269 | 17.825292   | -2.723830693 | 5.07E-05 | 0.000235244 |
| Slc7a3      | 14 | 60.39419025 | 69.68665468 | 9.292464431  | 5.08E-05 | 0.000235581 |
| 00014K23F   | 1  | 83.33333333 | 60.92715232 | -22.40618102 | 5.16E-05 | 0.000239329 |
| Rbmx        | 29 | 21.56667476 | 18.13608905 | -3.43058571  | 5.23E-05 | 0.000242513 |
| Emid1       | 39 | 14.5771164  | 13.1263414  | -1.450774998 | 5.23E-05 | 0.000242536 |
| Mir9-2      | 4  | 45.64793614 | 36.73610947 | -8.911826668 | 5.28E-05 | 0.000244718 |
| Foxc1       | 87 | 5.206791281 | 4.484513184 | -0.722278098 | 5.30E-05 | 0.000245465 |
| Tmem198     | 37 | 2.193134551 | 1.409845824 | -0.783288727 | 5.30E-05 | 0.000245465 |
| Nhs1        | 4  | 5.727233384 | 2.166666667 | -3.560566718 | 5.41E-05 | 0.000250414 |
| Sparcl1     | 4  | 44.58747645 | 33.30339196 | -11.28408449 | 5.42E-05 | 0.000250598 |
| Tnf         | 3  | 93.05653296 | 84.77114357 | -8.285389392 | 5.46E-05 | 0.000252277 |
| Helt        | 17 | 7.280521476 | 13.4373932  | 6.156871729  | 5.54E-05 | 0.00025629  |
| Lsmem1      | 1  | 43.63636364 | 11.29032258 | -32.34604106 | 5.62E-05 | 0.000259872 |
| Frmpd4      | 9  | 23.481249   | 31.71860166 | 8.237352658  | 5.68E-05 | 0.000262441 |
| Hdhd3       | 21 | 4.11412685  | 2.590672757 | -1.523454094 | 5.69E-05 | 0.000262719 |
| Fbxw21      | 2  | 87.94984844 | 78.0187722  | -9.931076246 | 5.73E-05 | 0.000264521 |
| Creld1      | 59 | 2.446784533 | 1.911727776 | -0.535056757 | 5.75E-05 | 0.00026519  |
| Mir219a-2   | 66 | 91.9595009  | 93.44327702 | 1.483776122  | 5.81E-05 | 0.000267949 |
| Tsen15      | 26 | 23.12110684 | 21.53929479 | -1.581812052 | 5.84E-05 | 0.000269554 |
| Zfp608      | 2  | 4.216998755 | 1.630746732 | -2.586252022 | 5.93E-05 | 0.000273309 |
| Tssk1       | 8  | 94.08377918 | 88.31148571 | -5.772293462 | 5.93E-05 | 0.000273508 |
| Mapk13      | 47 | 5.699445303 | 4.413277651 | -1.286167652 | 6.02E-05 | 0.000277467 |
| Esrrb       | 33 | 27.38348146 | 32.46199218 | 5.07851072   | 6.05E-05 | 0.000278594 |
| Fgf14       | 11 | 49.97396509 | 44.45239995 | -5.521565145 | 6.07E-05 | 0.000279534 |
| 30556M19f   | 27 | 3.077551219 | 1.641731985 | -1.435819234 | 6.16E-05 | 0.000283646 |
| Gpld1       | 2  | 23.83436139 | 13.80944939 | -10.024912   | 6.20E-05 | 0.000285259 |
| Papln       | 14 | 5.692933502 | 3.26344405  | -2.429489453 | 6.20E-05 | 0.00028529  |

|            |     |             |             |              |          |             |
|------------|-----|-------------|-------------|--------------|----------|-------------|
| Ntrk2      | 27  | 43.042849   | 47.67913012 | 4.636281114  | 6.21E-05 | 0.000285745 |
| Slco2a1    | 23  | 3.771087088 | 2.57132264  | -1.199764448 | 6.23E-05 | 0.00028662  |
| Fhdc1      | 89  | 3.131819533 | 4.074161246 | 0.942341713  | 6.25E-05 | 0.00028746  |
| Mir7031    | 5   | 14.56994943 | 20.34286485 | 5.772915417  | 6.27E-05 | 0.00028834  |
| Glrb       | 18  | 20.27234777 | 24.46553361 | 4.193185845  | 6.32E-05 | 0.000290315 |
| Fezf2      | 20  | 22.90288697 | 18.64711179 | -4.255775181 | 6.34E-05 | 0.000291403 |
| Krt18      | 13  | 5.407053596 | 3.783893144 | -1.623160453 | 6.35E-05 | 0.000291512 |
| Dock1      | 36  | 2.144466549 | 1.396790864 | -0.747675685 | 6.37E-05 | 0.000292525 |
| Corin      | 4   | 15.92027505 | 23.38757594 | 7.467300897  | 6.39E-05 | 0.000293329 |
| 30444B04F  | 1   | 79.28802589 | 90.2173913  | 10.92936541  | 6.45E-05 | 0.000295832 |
| 700039E22F | 42  | 16.23999501 | 15.68280335 | -0.557191657 | 6.45E-05 | 0.000295832 |
| Cd180      | 1   | 58.69565217 | 28.91566265 | -29.77998952 | 6.47E-05 | 0.000296454 |
| Cacnb1     | 58  | 5.424918979 | 4.364330278 | -1.060588701 | 6.51E-05 | 0.000298512 |
| Xlr        | 3   | 62.08229413 | 52.98285686 | -9.099437268 | 6.65E-05 | 0.000304611 |
| 30483J18R  | 14  | 2.331553092 | 1.1706448   | -1.160908292 | 6.71E-05 | 0.000307489 |
| Dll1       | 71  | 2.579100923 | 1.706290017 | -0.872810906 | 6.81E-05 | 0.000311604 |
| Ttyh1      | 25  | 17.15901051 | 15.59498912 | -1.564021389 | 6.86E-05 | 0.00031415  |
| Mir7000    | 5   | 95.23317293 | 87.58787879 | -7.645294146 | 6.87E-05 | 0.000314198 |
| Csgalnact1 | 31  | 2.387408955 | 1.678500704 | -0.70890825  | 6.90E-05 | 0.000315649 |
| Dgkb       | 6   | 23.58854228 | 30.58202198 | 6.993479701  | 6.91E-05 | 0.000315799 |
| Ccdc92     | 133 | 6.259084243 | 5.501128318 | -0.757955925 | 6.98E-05 | 0.000318921 |
| Ube2o      | 121 | 1.567383083 | 1.179806108 | -0.387576975 | 7.03E-05 | 0.000321125 |
| Zfp879     | 7   | 42.13026571 | 34.93333676 | -7.196928941 | 7.11E-05 | 0.000325017 |
| Mzb1       | 6   | 95.49887364 | 90.55357763 | -4.945296012 | 7.12E-05 | 0.000325085 |
| Cxx1b      | 4   | 28.65498385 | 19.52756553 | -9.127418321 | 7.18E-05 | 0.000327776 |
| Rnf125     | 3   | 23.07954428 | 13.23935786 | -9.84018642  | 7.18E-05 | 0.000327776 |
| BC037032   | 25  | 2.530065773 | 1.318754417 | -1.211311356 | 7.20E-05 | 0.000328551 |
| Cxcl3      | 9   | 14.70250899 | 11.8685435  | -2.833965486 | 7.25E-05 | 0.000330852 |
| Slc22a1    | 5   | 95.99565457 | 91.63717751 | -4.35847706  | 7.28E-05 | 0.000332002 |
| Abtb2      | 47  | 2.582021701 | 1.5116765   | -1.070345201 | 7.30E-05 | 0.000332612 |
| Tex13      | 14  | 90.61879761 | 86.45897252 | -4.159825093 | 7.31E-05 | 0.000333265 |
| Gira1      | 13  | 10.22349733 | 8.339238682 | -1.884258649 | 7.33E-05 | 0.000334079 |
| Itgal      | 5   | 43.16693649 | 54.23417037 | 11.06723388  | 7.36E-05 | 0.000335225 |
| Rims4      | 54  | 17.09433949 | 22.078505   | 4.984165509  | 7.42E-05 | 0.000337764 |

|              |     |             |             |              |          |             |
|--------------|-----|-------------|-------------|--------------|----------|-------------|
| 330046C22F   | 1   | 53.125      | 35.95505618 | -17.16994382 | 7.48E-05 | 0.000340659 |
| Ccdc24       | 13  | 40.92476227 | 44.56351187 | 3.638749597  | 7.49E-05 | 0.000340923 |
| Lipe         | 6   | 37.78677408 | 32.62366658 | -5.163107495 | 7.58E-05 | 0.000344627 |
| Zap70        | 14  | 84.32460393 | 78.88919116 | -5.43541277  | 7.66E-05 | 0.000348497 |
| Mirlet7c-2   | 5   | 69.04277581 | 74.23009566 | 5.187319844  | 7.68E-05 | 0.000349255 |
| Sbspon       | 22  | 33.29357453 | 30.70048129 | -2.593093239 | 7.69E-05 | 0.000349263 |
| S100z        | 10  | 94.29320218 | 89.99070116 | -4.302501013 | 7.71E-05 | 0.000350056 |
| Vdr          | 35  | 3.06959909  | 2.295586792 | -0.774012298 | 7.73E-05 | 0.000351011 |
| Foxb1        | 29  | 25.01695939 | 27.95674991 | 2.939790519  | 7.77E-05 | 0.000352731 |
| H2-K1        | 39  | 1.633516034 | 1.10230438  | -0.531211654 | 7.78E-05 | 0.000353314 |
| Lrp4         | 49  | 10.19785109 | 9.066149884 | -1.131701205 | 7.79E-05 | 0.000353425 |
| LOC10263175  | 3   | 70.7286502  | 64.22155574 | -6.507094459 | 7.79E-05 | 0.000353425 |
| Mir6977      | 7   | 93.11641644 | 89.25863245 | -3.857783989 | 7.80E-05 | 0.000353492 |
| Myef2        | 60  | 1.561855917 | 2.208173353 | 0.646317436  | 7.80E-05 | 0.000353492 |
| Crhr1        | 74  | 27.49181896 | 26.42927941 | -1.062539546 | 7.80E-05 | 0.000353492 |
| Mfap2        | 4   | 40.34691455 | 26.63816696 | -13.70874759 | 7.87E-05 | 0.000356347 |
| Mir8120      | 57  | 1.930617232 | 1.53778554  | -0.392831692 | 7.95E-05 | 0.000360089 |
| Epha1        | 33  | 2.893573583 | 1.879352357 | -1.014221226 | 7.95E-05 | 0.000360126 |
| Tifab        | 1   | 48          | 17          | -31          | 8.03E-05 | 0.000363324 |
| LOC432842    | 69  | 63.75230265 | 61.69894611 | -2.053356536 | 8.05E-05 | 0.000364269 |
| Eed          | 28  | 0.714055757 | 1.415522678 | 0.701466921  | 8.07E-05 | 0.000365079 |
| Ptpn12       | 112 | 1.572796908 | 1.218638312 | -0.354158596 | 8.19E-05 | 0.000370309 |
| Lpcat2       | 35  | 34.83540765 | 36.63935266 | 1.803945012  | 8.25E-05 | 0.000373092 |
| Ap1s3        | 15  | 18.56825249 | 21.07653468 | 2.508282189  | 8.27E-05 | 0.000373586 |
| Ptges        | 13  | 13.43989762 | 9.769744563 | -3.670153061 | 8.28E-05 | 0.000373979 |
| Sel1l3       | 103 | 2.117138421 | 1.584808966 | -0.532329454 | 8.44E-05 | 0.000381081 |
| Mir10b       | 5   | 56.10879703 | 49.02425692 | -7.084540109 | 8.51E-05 | 0.000384056 |
| Pcdhac1      | 23  | 55.05454101 | 58.84465402 | 3.790113011  | 8.59E-05 | 0.000387621 |
| LOC10124H12F | 1   | 18.00643087 | 7.482993197 | -10.52343767 | 8.70E-05 | 0.00039244  |
| Trim15       | 5   | 22.82100046 | 16.92228977 | -5.898710695 | 8.76E-05 | 0.000395112 |
| Tmem132b     | 87  | 13.61270596 | 15.37775302 | 1.765047059  | 8.79E-05 | 0.000396551 |
| Hexb         | 39  | 4.317482012 | 2.54521096  | -1.772271052 | 8.80E-05 | 0.000396845 |
| Fut4-ps1     | 4   | 69.98180741 | 58.49269279 | -11.48911462 | 8.84E-05 | 0.000398285 |
| Zc3hc1       | 6   | 2.988870457 | 0.524934383 | -2.463936074 | 8.90E-05 | 0.00040095  |



|          |     |             |             |              |            |             |
|----------|-----|-------------|-------------|--------------|------------|-------------|
| Dhcr7    | 6   | 2.550626166 | 0.783978012 | -1.766648153 | 8.91E-05   | 0.00040132  |
| Mapk10   | 4   | 52.98941799 | 50.77431882 | -2.215099171 | 8.98E-05   | 0.000404401 |
| Ndrp2    | 22  | 4.699451247 | 2.808260653 | -1.891190593 | 9.06E-05   | 0.000407785 |
| Clstn1   | 108 | 1.575143344 | 1.072617836 | -0.502525508 | 9.07E-05   | 0.000407974 |
| Otx1     | 82  | 2.896401386 | 2.019555517 | -0.876845869 | 9.10E-05   | 0.000409235 |
| Fam46c   | 66  | 2.233876248 | 1.555506355 | -0.678369893 | 9.17E-05   | 0.00041231  |
| Tnp2     | 1   | 55.55555556 | 81.9047619  | 26.34920635  | 9.24E-05   | 0.000415314 |
| Rcan2    | 41  | 8.010971895 | 6.694327645 | -1.31664425  | 9.32E-05   | 0.000418822 |
| Sncb     | 26  | 14.35612568 | 12.88954129 | -1.466584396 | 9.37E-05   | 0.000420817 |
| Olfr633  | 1   | 88.63636364 | 65.04854369 | -23.58781995 | 9.39E-05   | 0.000421737 |
| Tsc22d1  | 161 | 4.479586    | 3.864975596 | -0.614610403 | 9.40E-05   | 0.000422134 |
| Mir6996  | 3   | 96.79894315 | 86.7910759  | -10.00786726 | 9.41E-05   | 0.000422268 |
| Nsun7    | 56  | 9.892349049 | 9.650412208 | -0.241936842 | 9.58E-05   | 0.000429773 |
| Larp4b   | 69  | 1.98512042  | 1.303237991 | -0.681882429 | 9.59E-05   | 0.000430399 |
| Yipf6    | 47  | 25.12120497 | 22.66437212 | -2.456832848 | 9.60E-05   | 0.000430726 |
| Ap1b1    | 81  | 6.091825005 | 4.95310492  | -1.138720086 | 9.68E-05   | 0.000434184 |
| Pcdha3   | 3   | 18.43296303 | 8.279758426 | -10.1532046  | 9.69E-05   | 0.00043437  |
| Zglp1    | 16  | 93.77364066 | 90.43097263 | -3.34266803  | 9.81E-05   | 0.000439337 |
| Atf6b    | 53  | 8.482393786 | 7.176023496 | -1.30637029  | 9.98E-05   | 0.000447129 |
| Ints5    | 39  | 14.87053912 | 13.03793909 | -1.832600039 | 0.00010005 | 0.000448029 |
| Mir5620  | 7   | 4.49105949  | 1.417159205 | -3.073900285 | 0.00010275 | 0.000459969 |
| Cx3cl1   | 20  | 10.50008501 | 6.726454899 | -3.773630109 | 0.00010352 | 0.000463273 |
| Sptssa   | 25  | 2.564901552 | 1.569076532 | -0.99582502  | 0.00010382 | 0.000464474 |
| Nme4     | 20  | 9.443254696 | 9.119604265 | -0.323650431 | 0.00010393 | 0.000464814 |
| Nadsyn1  | 9   | 2.199793224 | 0.643424955 | -1.556368269 | 0.00010459 | 0.000467636 |
| Sspo     | 2   | 76.26352762 | 64.22018349 | -12.04334414 | 0.00010473 | 0.000468092 |
| Rhd      | 11  | 75.4568419  | 68.71715498 | -6.739686921 | 0.00010493 | 0.000468864 |
| Zfp580   | 22  | 6.694492579 | 9.282557613 | 2.588065034  | 0.00010604 | 0.000473667 |
| Pnky     | 47  | 19.9509175  | 18.08257972 | -1.86833778  | 0.00010646 | 0.000475392 |
| Dpf3     | 25  | 1.588532364 | 1.195790353 | -0.392742011 | 0.00010872 | 0.000485359 |
| Triqk    | 15  | 6.114320443 | 4.044947705 | -2.069372738 | 0.00010897 | 0.000486335 |
| Adamts14 | 55  | 1.987470131 | 1.30402636  | -0.68344377  | 0.00010942 | 0.000488184 |
| Pex3     | 30  | 1.404309151 | 0.630266805 | -0.774042346 | 0.00010985 | 0.000489934 |
| Trim71   | 16  | 8.930020862 | 7.241152481 | -1.688868381 | 0.00011008 | 0.000490817 |

|            |    |             |             |              |            |             |
|------------|----|-------------|-------------|--------------|------------|-------------|
| Mamld1     | 25 | 19.19804062 | 16.14586707 | -3.052173552 | 0.00011228 | 0.000500463 |
| Krtcap3    | 4  | 61.83431599 | 52.10540881 | -9.728907175 | 0.00011327 | 0.000504726 |
| Tshr       | 11 | 10.94482084 | 7.773944068 | -3.17087677  | 0.00011372 | 0.000506577 |
| Lrrc10     | 22 | 62.82685706 | 66.04678657 | 3.219929513  | 0.0001139  | 0.000506957 |
| Slc6a2     | 69 | 46.62843902 | 44.52535108 | -2.103087941 | 0.00011386 | 0.000506957 |
| Cldn4      | 3  | 35.88240132 | 26.85884279 | -9.023558534 | 0.00011387 | 0.000506957 |
| Slc39a8    | 9  | 4.113953523 | 1.258835309 | -2.855118214 | 0.00011446 | 0.000509165 |
| Hoxb5os    | 1  | 88.33333333 | 72.98578199 | -15.34755134 | 0.00011447 | 0.000509165 |
| Gm5414     | 1  | 42.9787234  | 26.16033755 | -16.81838585 | 0.00011517 | 0.000512126 |
| Pnpla1     | 3  | 71.89811739 | 58.75889968 | -13.13921771 | 0.00011537 | 0.00051286  |
| Vwa7       | 6  | 28.76104941 | 21.92140883 | -6.83964058  | 0.00011558 | 0.000513616 |
| 333421I07R | 1  | 98.98989899 | 86.46616541 | -12.52373358 | 0.00011568 | 0.000513933 |
| Gaa        | 12 | 8.912898237 | 4.674417024 | -4.238481213 | 0.00011636 | 0.000516752 |
| Mylk2      | 7  | 36.15852916 | 28.6883899  | -7.47013926  | 0.00011639 | 0.000516752 |
| Susd4      | 74 | 9.441657939 | 9.036105149 | -0.40555279  | 0.00011656 | 0.000517346 |
| Usp11      | 14 | 18.06182836 | 14.1655529  | -3.896275454 | 0.00011712 | 0.000519703 |
| Lrrc23     | 2  | 17.87998958 | 7.443589409 | -10.43640017 | 0.00011823 | 0.000524459 |
| Phka2      | 13 | 21.54853273 | 15.8999494  | -5.648583325 | 0.00011845 | 0.000525287 |
| Hoxc9      | 34 | 33.49712037 | 30.73814352 | -2.758976854 | 0.00011867 | 0.000526075 |
| Plekhd1os  | 11 | 22.88040032 | 26.16985205 | 3.289451733  | 0.00012018 | 0.000532631 |
| Haghl      | 9  | 9.604871203 | 6.575742562 | -3.029128642 | 0.00012081 | 0.00053525  |
| Al467606   | 3  | 10.05086719 | 5.485423181 | -4.565444013 | 0.00012104 | 0.000536092 |
| Six4       | 46 | 2.672604545 | 1.715347641 | -0.957256904 | 0.00012134 | 0.000537297 |
| Ccl1       | 2  | 69.80519481 | 57.45184184 | -12.35335297 | 0.00012164 | 0.000538464 |
| Nr0b1      | 7  | 47.58837464 | 36.02156075 | -11.56681388 | 0.00012572 | 0.000556328 |
| Mcmdc2     | 16 | 62.9377408  | 65.98878385 | 3.051043055  | 0.00012597 | 0.000557115 |
| Gm9920     | 5  | 4.378481276 | 2.205619844 | -2.172861432 | 0.00012596 | 0.000557115 |
| Mfhas1     | 97 | 1.966071144 | 1.155742554 | -0.81032859  | 0.00012833 | 0.000567215 |
| Gnai1      | 40 | 3.393825455 | 2.765985258 | -0.627840197 | 0.00012831 | 0.000567215 |
| Plcx3      | 6  | 15.88505684 | 12.63275957 | -3.252297267 | 0.00012948 | 0.000572095 |
| Arhgap36   | 28 | 47.41570957 | 43.7168596  | -3.698849965 | 0.00013008 | 0.000574602 |
| Camkv      | 20 | 16.09048418 | 14.18029442 | -1.910189763 | 0.00013054 | 0.000576463 |
| Acsf3      | 23 | 3.109459024 | 1.662962683 | -1.446496341 | 0.00013093 | 0.000578003 |
| Ribc2      | 6  | 32.19296209 | 38.61340113 | 6.420439041  | 0.00013191 | 0.000582152 |

|            |     |             |             |              |            |             |
|------------|-----|-------------|-------------|--------------|------------|-------------|
| Actrt3     | 15  | 4.880565499 | 3.630694427 | -1.249871072 | 0.00013322 | 0.000587775 |
| Sema3c     | 45  | 1.901547443 | 1.525133066 | -0.376414378 | 0.0001336  | 0.000589242 |
| 700065J11R | 6   | 95.36812743 | 91.30603746 | -4.062089967 | 0.00013381 | 0.000590006 |
| Polr2f     | 33  | 1.069986983 | 0.721447522 | -0.348539461 | 0.0001343  | 0.000592007 |
| Tssk6      | 60  | 2.816101903 | 2.047359498 | -0.768742405 | 0.00013453 | 0.000592807 |
| Slc38a5    | 1   | 31.95876289 | 58.49056604 | 26.53180315  | 0.00013545 | 0.000596691 |
| Tagap      | 3   | 8.447848448 | 14.18257937 | 5.734730918  | 0.00013595 | 0.000598736 |
| Scgn       | 9   | 31.00735177 | 28.41923757 | -2.588114198 | 0.00013682 | 0.000602368 |
| Ocln       | 27  | 4.900463753 | 6.730297418 | 1.829833665  | 0.00013692 | 0.000602621 |
| Ptchd4     | 26  | 44.06520721 | 41.43336414 | -2.631843065 | 0.00013707 | 0.000603111 |
| Nrg3       | 104 | 63.56313922 | 62.2343896  | -1.328749619 | 0.00013749 | 0.000604792 |
| Col12a1    | 29  | 5.708047769 | 5.181490962 | -0.526556806 | 0.00013767 | 0.000605379 |
| Timm17b    | 18  | 14.37736509 | 11.23741741 | -3.13994768  | 0.00013801 | 0.000606704 |
| Hes6       | 48  | 2.583068979 | 1.881904539 | -0.701164439 | 0.00013922 | 0.000611842 |
| Fam195b    | 51  | 7.294556689 | 6.035015315 | -1.259541374 | 0.0001395  | 0.000612893 |
| Erp27      | 3   | 90.95988182 | 84.24459527 | -6.715286551 | 0.0001406  | 0.000617532 |
| Cmtm7      | 53  | 2.569268192 | 2.138852424 | -0.430415768 | 0.00014113 | 0.00061967  |
| B3gnt5     | 10  | 13.56956864 | 8.676443773 | -4.893124872 | 0.00014252 | 0.000625579 |
| Anapc5     | 23  | 1.412711762 | 2.283072803 | 0.870361042  | 0.00014476 | 0.000635219 |
| Pthlh      | 69  | 2.059602261 | 1.626300542 | -0.433301719 | 0.00014507 | 0.000636417 |
| Hs3st5     | 27  | 11.55140742 | 10.6847578  | -0.866649617 | 0.00014555 | 0.000638317 |
| Osmr       | 23  | 1.922469397 | 1.252595732 | -0.669873665 | 0.0001463  | 0.000641416 |
| Tram11l    | 48  | 64.03940527 | 66.42164465 | 2.382239381  | 0.00014724 | 0.000645331 |
| Zcchc24    | 61  | 2.19182304  | 1.455672634 | -0.736150407 | 0.00014753 | 0.000646418 |
| Cpe        | 37  | 1.952537546 | 1.14435711  | -0.808180437 | 0.00014929 | 0.000653956 |
| Atxn7l2    | 27  | 1.655267541 | 0.771843953 | -0.883423588 | 0.00014959 | 0.000655044 |
| Fscn1      | 39  | 4.659622247 | 3.627349317 | -1.03227293  | 0.00014976 | 0.000655611 |
| Adora2a    | 34  | 3.135839637 | 4.958049286 | 1.82220965   | 0.00015332 | 0.000670989 |
| Pkia       | 32  | 1.901341519 | 1.22425786  | -0.677083659 | 0.00015347 | 0.000671428 |
| Gpx8       | 10  | 6.441615343 | 3.057347913 | -3.384267431 | 0.0001541  | 0.000674006 |
| Fbxo27     | 13  | 42.53242729 | 41.95949098 | -0.572936305 | 0.00015604 | 0.00068226  |
| Fam229a    | 43  | 67.85518331 | 70.84187768 | 2.986694364  | 0.00015764 | 0.000689085 |
| Ddn        | 19  | 5.115537447 | 3.293705454 | -1.821831993 | 0.00015789 | 0.000689969 |
| Tbc1d25    | 9   | 15.19180041 | 10.80056263 | -4.391237782 | 0.00016021 | 0.000699881 |

|            |     |             |             |              |            |             |
|------------|-----|-------------|-------------|--------------|------------|-------------|
| Msn        | 28  | 14.93387081 | 12.29691697 | -2.636953836 | 0.00016073 | 0.000701964 |
| Rab33a     | 5   | 47.1812294  | 39.96453456 | -7.216694841 | 0.00016226 | 0.000708421 |
| Gm16432    | 4   | 97.74769305 | 94.07094368 | -3.67674938  | 0.00016526 | 0.000721307 |
| Nat3       | 2   | 74.41783998 | 65.51797631 | -8.899863674 | 0.00016553 | 0.000722288 |
| Aox4       | 5   | 26.90263584 | 18.28942297 | -8.613212872 | 0.00016565 | 0.000722591 |
| 130519K11F | 102 | 24.91284484 | 23.95684697 | -0.955997871 | 0.00016613 | 0.000724462 |
| Dnajc11    | 106 | 3.204731531 | 2.610762533 | -0.593968998 | 0.00016807 | 0.000732702 |
| Gm128      | 21  | 88.53723104 | 90.5030549  | 1.965823863  | 0.00016824 | 0.000733238 |
| Tnks1bp1   | 3   | 10.02734131 | 4.486859343 | -5.540481965 | 0.00016844 | 0.000733865 |
| Thnsl1     | 16  | 1.595314885 | 0.94194186  | -0.653373025 | 0.00016879 | 0.000735185 |
| Rgs8       | 12  | 32.92322406 | 29.18765009 | -3.735573965 | 0.00017059 | 0.000742804 |
| Fnbp1      | 106 | 10.12387345 | 9.154755436 | -0.969118013 | 0.00017248 | 0.000750825 |
| Xpot       | 63  | 5.439476647 | 6.53974188  | 1.100265233  | 0.00017297 | 0.000752716 |
| Slc22a21   | 41  | 1.548255118 | 0.980562624 | -0.567692494 | 0.00017441 | 0.000758778 |
| Pfkm       | 5   | 27.5113747  | 19.2917619  | -8.219612795 | 0.00017551 | 0.000763319 |
| Mreg       | 82  | 1.727836728 | 1.197583265 | -0.530253463 | 0.00017918 | 0.000779058 |
| Ttc12      | 6   | 5.776765599 | 1.991546583 | -3.785219016 | 0.00017933 | 0.000779466 |
| Nat8l      | 59  | 20.0786625  | 19.62623283 | -0.452429674 | 0.00017974 | 0.000781002 |
| Tmem136    | 48  | 2.617692708 | 1.873411257 | -0.74428145  | 0.00017982 | 0.000781127 |
| Stra8      | 4   | 93.66207322 | 87.40985577 | -6.252217452 | 0.00017992 | 0.000781357 |
| Uhrf2      | 79  | 35.86933805 | 37.29203922 | 1.422701172  | 0.00018144 | 0.000787701 |
| Myocd      | 26  | 43.15721916 | 39.8100981  | -3.347121057 | 0.00018336 | 0.00079579  |
| C4a        | 2   | 92.25352113 | 84.67037929 | -7.583141837 | 0.00018475 | 0.000801612 |
| Mir6364    | 1   | 89.8989899  | 69.91869919 | -19.98029071 | 0.0001874  | 0.000812877 |
| Sult2b1    | 24  | 3.628214338 | 2.385638712 | -1.242575626 | 0.00018776 | 0.000814195 |
| Mal        | 12  | 2.800159031 | 1.625305378 | -1.174853654 | 0.000189   | 0.000819298 |
| Slc25a5    | 21  | 24.69950962 | 21.32858203 | -3.370927593 | 0.00018922 | 0.000820039 |
| Mogat2     | 1   | 28.16091954 | 12.80788177 | -15.35303777 | 0.00018937 | 0.000820441 |
| Sall2      | 7   | 5.498591447 | 3.325806731 | -2.172784716 | 0.00019125 | 0.00082833  |
| Arsj       | 4   | 23.41916558 | 10.90043669 | -12.51872889 | 0.00019181 | 0.000830514 |
| Gm16702    | 3   | 36.84906159 | 25.33128013 | -11.51778146 | 0.00019264 | 0.000833854 |
| Ndst4      | 6   | 53.69192667 | 45.60889036 | -8.08303631  | 0.00019367 | 0.000838079 |
| 30019O22F  | 3   | 6.504881745 | 2.59879905  | -3.906082695 | 0.00019582 | 0.000847124 |
| Fam50a     | 8   | 22.65280722 | 17.41128103 | -5.241526183 | 0.000199   | 0.000860612 |

|            |    |             |             |              |            |             |
|------------|----|-------------|-------------|--------------|------------|-------------|
| Oacyl      | 3  | 50          | 68.75066454 | 18.75066454  | 0.00020079 | 0.000867909 |
| I30455C13F | 6  | 95.42581273 | 89.7524675  | -5.673345233 | 0.0002008  | 0.000867909 |
| Ccdc132    | 7  | 1.842911967 | 0.874047446 | -0.968864521 | 0.00020159 | 0.00087107  |
| Magi2      | 36 | 23.04608766 | 26.42289183 | 3.376804178  | 0.00020204 | 0.000872756 |
| Gpr37      | 22 | 42.24753441 | 47.08501586 | 4.837481452  | 0.00020237 | 0.00087392  |
| Grm6       | 15 | 21.30789775 | 25.5938957  | 4.285997949  | 0.000203   | 0.000876374 |
| Gss        | 20 | 2.559894766 | 1.329719638 | -1.230175128 | 0.00020582 | 0.000888311 |
| H2afb3     | 6  | 92.99619291 | 86.48877083 | -6.507422086 | 0.00020969 | 0.00090473  |
| Tmem181a   | 14 | 2.300811769 | 0.765766995 | -1.535044775 | 0.00021408 | 0.000923148 |
| Wdr90      | 34 | 1.550622067 | 0.901729878 | -0.648892189 | 0.00021403 | 0.000923148 |
| Rasgrf1    | 13 | 52.31652762 | 59.18708993 | 6.870562314  | 0.00021453 | 0.000924783 |
| Lrrc8e     | 20 | 13.83383539 | 11.63960628 | -2.194229117 | 0.00021537 | 0.000928134 |
| Mir7040    | 7  | 92.60319176 | 85.57028788 | -7.032903877 | 0.00021994 | 0.000947548 |
| Csf2rb     | 5  | 66.39542621 | 58.63212568 | -7.763300531 | 0.0002215  | 0.00095399  |
| Emp2       | 48 | 2.304781816 | 1.750747736 | -0.55403408  | 0.00022227 | 0.000957048 |
| Mir6346    | 2  | 34.36724566 | 25.77589134 | -8.591354316 | 0.00022297 | 0.000959763 |
| Stom       | 15 | 3.25236125  | 1.801047848 | -1.451313401 | 0.00022383 | 0.000963203 |
| Kcnk13     | 8  | 9.064180706 | 6.487252356 | -2.57692835  | 0.00022625 | 0.00097332  |
| I30018L16F | 21 | 32.04479062 | 35.86022498 | 3.815434358  | 0.00022941 | 0.000986635 |
| Gm28979    | 1  | 54.06976744 | 35.26570048 | -18.80406696 | 0.00023319 | 0.001002581 |
| Gpr3       | 29 | 3.62263432  | 1.815311468 | -1.807322851 | 0.00023534 | 0.001011543 |
| Pbx2       | 61 | 2.578293761 | 1.893061058 | -0.685232703 | 0.00024042 | 0.001033069 |
| Mir7008    | 2  | 47.5        | 28.12861439 | -19.37138561 | 0.00024086 | 0.001034667 |
| Bcl9l      | 25 | 3.859183824 | 3.123824574 | -0.73535925  | 0.00024106 | 0.001035221 |
| Gprasp2    | 4  | 30.40099329 | 41.04938272 | 10.64838943  | 0.00024489 | 0.001051334 |
| Rbm43      | 34 | 1.881386312 | 0.834407786 | -1.046978526 | 0.00024606 | 0.001056075 |
| Kbtbd8     | 56 | 1.864952898 | 1.377458241 | -0.487494656 | 0.00024681 | 0.001058953 |
| Col19a1    | 5  | 35.77020797 | 28.6070442  | -7.163163772 | 0.00024901 | 0.001068121 |
| Clec1a     | 4  | 65.40296329 | 56.54259122 | -8.860372069 | 0.00025011 | 0.001072209 |
| Tmem119    | 3  | 6.818181818 | 17.14285714 | 10.32467532  | 0.00025007 | 0.001072209 |
| Itga8      | 38 | 14.18287582 | 14.74055663 | 0.5576808    | 0.00025423 | 0.001089551 |
| I10030G06F | 16 | 8.776326093 | 4.82698502  | -3.949341073 | 0.00025486 | 0.001091935 |
| Podxl      | 71 | 2.808305614 | 1.747013034 | -1.06129258  | 0.00025526 | 0.001093305 |
| Scgb1c1    | 2  | 16.66666667 | 7.961482961 | -8.705183705 | 0.0002556  | 0.001094447 |

|            |     |             |             |              |            |             |
|------------|-----|-------------|-------------|--------------|------------|-------------|
| Sfxn3      | 11  | 2.912239523 | 2.203585478 | -0.708654045 | 0.0002562  | 0.001096709 |
| Gdf3       | 5   | 74.4818639  | 66.08629206 | -8.395571836 | 0.00025657 | 0.001097949 |
| Slc36a4    | 64  | 1.395632574 | 0.94095833  | -0.454674243 | 0.00025771 | 0.001102525 |
| Zrsr2      | 21  | 19.92404937 | 15.76137573 | -4.162673637 | 0.00026028 | 0.001113186 |
| Il13ra1    | 44  | 17.95678893 | 15.16537101 | -2.791417928 | 0.00026097 | 0.001115817 |
| Pxdc1      | 30  | 1.756248338 | 1.413608931 | -0.342639407 | 0.00026314 | 0.001124758 |
| Prdm2      | 93  | 1.73328413  | 2.592020011 | 0.858735881  | 0.0002661  | 0.001137066 |
| Plekhs1    | 4   | 46.69709662 | 54.71194404 | 8.014847425  | 0.00026862 | 0.00114753  |
| Haglr      | 31  | 47.86790227 | 45.46904192 | -2.398860342 | 0.00026903 | 0.001148607 |
| Gm6537     | 6   | 12.27082071 | 4.32308518  | -7.947735533 | 0.00026898 | 0.001148607 |
| Syt6       | 85  | 27.16249046 | 29.58199655 | 2.41950609   | 0.00027164 | 0.001159419 |
| 300017J02R | 4   | 48.27711789 | 37.29224377 | -10.98487412 | 0.00027293 | 0.00116428  |
| Slc40a1    | 28  | 4.197808116 | 3.775985176 | -0.42182294  | 0.00027294 | 0.00116428  |
| Zfp444     | 28  | 3.433575861 | 2.015385397 | -1.418190464 | 0.00027703 | 0.00118131  |
| Slc24a4    | 71  | 7.104816553 | 8.961528751 | 1.856712199  | 0.00027709 | 0.00118131  |
| Hap1       | 29  | 1.995676506 | 1.219797782 | -0.775878724 | 0.00027726 | 0.00118166  |
| '00012D16F | 1   | 86.2745098  | 65.17857143 | -21.09593838 | 0.00027903 | 0.00118888  |
| Tmod1      | 72  | 2.170076202 | 1.616606141 | -0.553470061 | 0.00028011 | 0.001193134 |
| Nono       | 10  | 10.59927635 | 17.10883384 | 6.509557498  | 0.00028233 | 0.001202235 |
| Steap1     | 95  | 2.235531465 | 1.81061366  | -0.424917806 | 0.00028313 | 0.001205142 |
| Sipa13     | 5   | 17.7162596  | 10.13372453 | -7.582535069 | 0.00028318 | 0.001205142 |
| Etv1       | 9   | 12.95161626 | 19.89823701 | 6.946620751  | 0.00028629 | 0.001218021 |
| Klhl15     | 122 | 14.66800898 | 13.44427345 | -1.223735528 | 0.00028795 | 0.001224749 |
| Zmat1      | 24  | 18.61167291 | 15.29625348 | -3.31541943  | 0.00029042 | 0.00123489  |
| Ccdc69     | 29  | 3.185606842 | 2.701944421 | -0.483662421 | 0.00029188 | 0.001240748 |
| Ddah1      | 53  | 2.554013638 | 1.820648778 | -0.73336486  | 0.00029394 | 0.001249118 |
| Irak1      | 24  | 20.17715777 | 17.01957924 | -3.157578524 | 0.00029639 | 0.001259168 |
| Mettl7a1   | 8   | 5.247656373 | 3.797735787 | -1.449920586 | 0.00029693 | 0.001261131 |
| Wbp1l      | 3   | 71.07385172 | 87.51931234 | 16.44546063  | 0.00029753 | 0.001263276 |
| Dpep2      | 5   | 73.48513302 | 80.34384216 | 6.858709139  | 0.00029877 | 0.001268206 |
| Pnmt       | 5   | 57.15554229 | 50.65819985 | -6.497342436 | 0.00029948 | 0.001270849 |
| Gm5095     | 3   | 33.15755997 | 24.48586813 | -8.671691845 | 0.00029959 | 0.001270923 |
| Kcnk15     | 71  | 14.55459895 | 16.73367801 | 2.179079063  | 0.00030055 | 0.001274663 |
| Lypd1      | 27  | 11.69222042 | 9.871548632 | -1.820671791 | 0.00030205 | 0.001280622 |

|           |     |             |             |              |            |             |
|-----------|-----|-------------|-------------|--------------|------------|-------------|
| Dusp23    | 35  | 3.926027354 | 2.85199567  | -1.074031684 | 0.00030552 | 0.00129499  |
| Camk2a    | 6   | 34.76458751 | 40.36760309 | 5.603015586  | 0.00030669 | 0.001299561 |
| Arap3     | 25  | 5.964065193 | 4.498412765 | -1.465652429 | 0.00030699 | 0.001300469 |
| Mir26b    | 6   | 78.50834876 | 72.5559929  | -5.952355855 | 0.00030818 | 0.001305127 |
| Prr23a3   | 6   | 77.32911024 | 83.10686621 | 5.777755975  | 0.00031014 | 0.00131304  |
| Brsk1     | 34  | 14.35679537 | 19.72967049 | 5.372875124  | 0.00031034 | 0.001313527 |
| Lrrc7     | 10  | 73.13362035 | 67.37948638 | -5.754133962 | 0.00031095 | 0.001315703 |
| Mageh1    | 11  | 34.35680938 | 30.85968417 | -3.497125212 | 0.00031321 | 0.001324879 |
| Ptpn1     | 83  | 6.162281357 | 4.581409223 | -1.580872133 | 0.00031578 | 0.001335359 |
| Gm9731    | 4   | 89.27326659 | 79.4198972  | -9.853369395 | 0.00031638 | 0.001337519 |
| Ralyl     | 18  | 45.13027501 | 48.25144817 | 3.121173152  | 0.00031663 | 0.001338198 |
| Lmod3     | 10  | 70.25588312 | 64.43136728 | -5.824515832 | 0.0003214  | 0.00135797  |
| Lingo1    | 2   | 97.34042553 | 92.09472468 | -5.24570085  | 0.00032266 | 0.001362899 |
| Olfir523  | 3   | 50.69834936 | 39.78724099 | -10.91110837 | 0.00032309 | 0.001364306 |
| Mir6968   | 18  | 94.76492872 | 91.84870393 | -2.916224796 | 0.00032542 | 0.00137375  |
| Tle6      | 7   | 22.10081438 | 16.65355169 | -5.447262693 | 0.00032582 | 0.00137504  |
| Mgat5b    | 109 | 10.5582392  | 10.03684656 | -0.521392643 | 0.00032777 | 0.001382905 |
| Cd59a     | 7   | 18.95687355 | 14.7130945  | -4.24377905  | 0.00032809 | 0.001383858 |
| Tmem63c   | 23  | 27.32519422 | 24.01577337 | -3.309420853 | 0.00032898 | 0.00138719  |
| Mir5132   | 25  | 20.23605084 | 17.15569748 | -3.080353356 | 0.00032932 | 0.001388233 |
| Cldnd1    | 61  | 3.206943006 | 2.679572457 | -0.527370548 | 0.00032968 | 0.001389354 |
| 33411C07F | 5   | 51.01123596 | 62.02629675 | 11.01506079  | 0.00033099 | 0.001394475 |
| Kcna1     | 7   | 44.54749424 | 49.88396115 | 5.336466911  | 0.00033332 | 0.001403904 |
| Hand1     | 24  | 57.12574852 | 60.28497915 | 3.159230624  | 0.00033389 | 0.001405893 |
| Bod1      | 66  | 1.660705765 | 1.1472378   | -0.513467965 | 0.00033624 | 0.001415391 |
| Slc7a4    | 6   | 4.781854799 | 2.306432394 | -2.475422405 | 0.00033906 | 0.00142682  |
| Htra1     | 56  | 5.574665813 | 4.438859001 | -1.135806812 | 0.00034019 | 0.001431157 |
| 10057M21f | 35  | 2.189514866 | 1.03934825  | -1.150166616 | 0.00034062 | 0.001432569 |
| Lzts3     | 46  | 1.364924956 | 1.132988955 | -0.231936001 | 0.00034102 | 0.001433857 |
| Tspan7    | 24  | 17.36933694 | 14.61640793 | -2.752929013 | 0.00034525 | 0.001451221 |
| Taz       | 16  | 17.63065623 | 14.62527379 | -3.005382444 | 0.00034546 | 0.001451668 |
| Nmur1     | 2   | 46.94467706 | 37.38619557 | -9.558481491 | 0.00034597 | 0.0014534   |
| Gm10649   | 64  | 2.086572255 | 1.428671385 | -0.65790087  | 0.0003472  | 0.001458157 |
| Snrpb2    | 47  | 1.389341647 | 1.720174322 | 0.330832675  | 0.00035036 | 0.001470992 |

|            |     |             |             |              |            |             |
|------------|-----|-------------|-------------|--------------|------------|-------------|
| l10004P03F | 1   | 37.14285714 | 17.12328767 | -20.01956947 | 0.00035067 | 0.001471904 |
| Il17re     | 2   | 54.45544554 | 42.33333333 | -12.12211221 | 0.00035245 | 0.00147896  |
| Lyn        | 28  | 1.303075362 | 0.821356152 | -0.48171921  | 0.00035345 | 0.001482726 |
| Osgin2     | 111 | 1.483903058 | 1.116522749 | -0.36738031  | 0.00035529 | 0.001489989 |
| l30070K13F | 1   | 10.25641026 | 31.53153153 | 21.27512128  | 0.00035639 | 0.001494209 |
| Kat2a      | 31  | 2.386170133 | 1.716148188 | -0.670021945 | 0.0003569  | 0.001495899 |
| Aldoart1   | 1   | 96.52173913 | 82.75862069 | -13.76311844 | 0.00036028 | 0.001509628 |
| Mir873a    | 2   | 93.4004884  | 83.33333333 | -10.06715507 | 0.0003624  | 0.001518094 |
| Sptan1     | 70  | 1.332926821 | 0.859127707 | -0.473799114 | 0.00036266 | 0.001518737 |
| Hs3st3a1   | 27  | 20.77796717 | 18.65785122 | -2.120115952 | 0.00036364 | 0.0015222   |
| l30403A02F | 61  | 10.59315379 | 10.3507616  | -0.242392189 | 0.00036369 | 0.0015222   |
| Phyh       | 8   | 2.860169492 | 6.969741494 | 4.109572002  | 0.00036522 | 0.001528155 |
| Plin5      | 14  | 6.038185494 | 4.540371809 | -1.497813685 | 0.00036601 | 0.001531015 |
| Gfap       | 11  | 97.39635339 | 94.24332278 | -3.153030605 | 0.00036676 | 0.001533723 |
| Rasd2      | 96  | 20.15246013 | 21.70109016 | 1.548630024  | 0.00036727 | 0.001535405 |
| Golm1      | 11  | 12.41845495 | 6.264912517 | -6.153542432 | 0.00036795 | 0.00153781  |
| Ppp1r42    | 3   | 46.17814085 | 57.23761723 | 11.05947638  | 0.00037139 | 0.001551763 |
| Slfn9      | 12  | 4.53377056  | 2.080805145 | -2.452965416 | 0.0003719  | 0.001553456 |
| Ikzf5      | 33  | 1.535345105 | 1.090504561 | -0.444840544 | 0.00037363 | 0.001559803 |
| Lrr1       | 28  | 1.420839633 | 0.46390311  | -0.956936523 | 0.00037356 | 0.001559803 |
| Osbp16     | 85  | 1.985480751 | 2.494595887 | 0.509115135  | 0.00037403 | 0.001561011 |
| Fam83h     | 72  | 4.781026995 | 3.990483936 | -0.790543059 | 0.00037484 | 0.001563967 |
| Bambi      | 71  | 11.35505192 | 11.48324582 | 0.128193908  | 0.00037532 | 0.00156551  |
| Hic1       | 126 | 29.93840807 | 29.50077761 | -0.437630465 | 0.0003755  | 0.001565814 |
| Grin3b     | 43  | 14.46578297 | 17.89019228 | 3.424409312  | 0.00037633 | 0.00156882  |
| Fancd2     | 1   | 9.972299169 | 3.428571429 | -6.54372774  | 0.00037704 | 0.001571332 |
| Ercc2      | 38  | 1.281717386 | 0.839339262 | -0.442378124 | 0.0003783  | 0.001576151 |
| Vac14      | 28  | 9.913726397 | 6.731360374 | -3.182366024 | 0.00037922 | 0.001579518 |
| Tmem159    | 2   | 8.06402439  | 0.657894737 | -7.406129653 | 0.00037953 | 0.001580353 |
| Echdc2     | 35  | 2.247503987 | 1.339676889 | -0.907827098 | 0.00038167 | 0.001588846 |
| Wdr81      | 30  | 3.018441447 | 1.567938542 | -1.450502905 | 0.00038562 | 0.001604815 |
| Hes5       | 90  | 15.3801877  | 16.57844012 | 1.198252425  | 0.00038576 | 0.001604938 |
| Lzts2      | 57  | 2.32912033  | 1.598761896 | -0.730358434 | 0.00038607 | 0.001605794 |
| Pphln1     | 20  | 1.476554538 | 0.871437297 | -0.605117241 | 0.00038621 | 0.001605917 |



|           |     |             |             |              |            |             |
|-----------|-----|-------------|-------------|--------------|------------|-------------|
| Hecw1     | 1   | 30.79847909 | 18.18181818 | -12.61666091 | 0.00038775 | 0.001611847 |
| Kif5c     | 72  | 4.921770108 | 4.411866609 | -0.509903499 | 0.0003884  | 0.001613917 |
| Drd4      | 18  | 21.55630271 | 19.70474567 | -1.851557043 | 0.00038847 | 0.001613917 |
| Dnal1     | 3   | 1.360544218 | 6.858237548 | 5.49769333   | 0.000391   | 0.001623975 |
| Cacng8    | 3   | 85.49792978 | 75.28822206 | -10.20970772 | 0.00039119 | 0.00162432  |
| Gm15471   | 3   | 70.27255347 | 80.32833616 | 10.05578269  | 0.00039184 | 0.001626569 |
| Sgip1     | 10  | 28.22461858 | 32.95399195 | 4.729373368  | 0.00039293 | 0.001630603 |
| Smarca2   | 67  | 2.17688053  | 1.545503153 | -0.631377377 | 0.0003943  | 0.001635848 |
| Aldh1a3   | 47  | 12.17063181 | 11.64216189 | -0.528469919 | 0.00039732 | 0.00164792  |
| Mospd1    | 4   | 28.38416574 | 20.71766164 | -7.666504103 | 0.00039902 | 0.001654478 |
| Irf9      | 10  | 15.71153249 | 19.47679093 | 3.765258442  | 0.00040445 | 0.001676543 |
| Zcchc10   | 6   | 31.64253682 | 23.48564012 | -8.156896704 | 0.0004046  | 0.001676686 |
| Acacb     | 1   | 76.98412698 | 57.2327044  | -19.75142258 | 0.00040811 | 0.001690721 |
| Spag8     | 11  | 39.98068522 | 43.38331323 | 3.402628005  | 0.00040905 | 0.001694178 |
| Amer1     | 11  | 22.0341825  | 18.09922736 | -3.934955141 | 0.00041006 | 0.001697841 |
| 33416M07f | 14  | 91.77730668 | 88.27539986 | -3.501906813 | 0.00041103 | 0.001701393 |
| Hrh3      | 46  | 6.491265363 | 5.861804312 | -0.629461051 | 0.00041143 | 0.00170256  |
| 30013L22R | 15  | 1.801856459 | 1.01318951  | -0.788666949 | 0.00041792 | 0.001728923 |
| Cdc42bpg  | 54  | 2.009428648 | 1.547940406 | -0.461488242 | 0.00041916 | 0.001733594 |
| Cobl      | 77  | 2.46698546  | 1.891585539 | -0.575399921 | 0.00041992 | 0.001736224 |
| Tmc4      | 4   | 83.78594694 | 77.93966769 | -5.846279249 | 0.00042182 | 0.001743617 |
| Rsph14    | 6   | 87.8410126  | 81.87022177 | -5.970790837 | 0.00042508 | 0.001756567 |
| Zfp521    | 34  | 5.129213191 | 8.254346024 | 3.125132833  | 0.00042556 | 0.001758072 |
| Kcnh3     | 100 | 17.19592368 | 16.5661236  | -0.629800086 | 0.00042731 | 0.001764784 |
| Zfyve28   | 69  | 7.376052179 | 6.855851475 | -0.520200704 | 0.00042933 | 0.001772652 |
| Sh3pxd2a  | 80  | 1.833810102 | 1.474378788 | -0.359431314 | 0.0004318  | 0.001782334 |
| Mir138-2  | 5   | 79.43281782 | 72.08468143 | -7.34813639  | 0.00043349 | 0.00178882  |
| Phf6      | 51  | 20.01991121 | 17.50273348 | -2.51717773  | 0.00043432 | 0.001791725 |
| Stx1b     | 7   | 15.64746963 | 9.811403779 | -5.836065846 | 0.00044174 | 0.001821847 |
| Cpsf4l    | 9   | 86.41544381 | 82.61499537 | -3.800448438 | 0.00044265 | 0.001825083 |
| Six6      | 29  | 24.70381641 | 23.35416159 | -1.349654826 | 0.00044351 | 0.001828112 |
| Sort1     | 143 | 2.911662114 | 2.432560091 | -0.479102023 | 0.0004481  | 0.001846499 |
| Mst1r     | 3   | 65.95875749 | 73.25781971 | 7.299062223  | 0.00044838 | 0.001847149 |
| Otop1     | 17  | 6.908411439 | 8.912811326 | 2.004399887  | 0.0004491  | 0.001849582 |

|             |     |             |             |              |            |             |
|-------------|-----|-------------|-------------|--------------|------------|-------------|
| Polr1e      | 16  | 1.580125313 | 1.04816044  | -0.531964873 | 0.00045252 | 0.00186314  |
| Rinl        | 4   | 74.66817496 | 82.27006076 | 7.601885796  | 0.0004548  | 0.001872026 |
| Nphs1       | 6   | 29.52368427 | 24.21581666 | -5.307867605 | 0.00045559 | 0.001874721 |
| Zfp647      | 38  | 1.938497263 | 1.484697193 | -0.45380007  | 0.000456   | 0.001875919 |
| Cda         | 13  | 3.886335508 | 2.389687619 | -1.496647889 | 0.00045728 | 0.001880642 |
| Cyp7b1      | 16  | 59.19912093 | 61.95726207 | 2.758141138  | 0.00046226 | 0.001900373 |
| Zfp579      | 19  | 4.389472359 | 3.535550557 | -0.853921802 | 0.00046234 | 0.001900373 |
| Fhod3       | 1   | 32.0754717  | 7.462686567 | -24.61278513 | 0.00046266 | 0.001901188 |
| Fbxw22      | 1   | 63.63636364 | 37.5        | -26.13636364 | 0.00046982 | 0.00192951  |
| I30524B15F  | 10  | 78.17511103 | 73.58658318 | -4.588527848 | 0.00046976 | 0.00192951  |
| Daglb       | 45  | 1.496390158 | 0.997104685 | -0.499285473 | 0.00047271 | 0.001940819 |
| Scube2      | 54  | 10.3468226  | 9.521452657 | -0.82536994  | 0.00047339 | 0.00194308  |
| Fam132b     | 14  | 7.751861413 | 4.746817469 | -3.005043944 | 0.00047575 | 0.001952214 |
| I320431F20F | 6   | 22.67237977 | 25.29055482 | 2.618175051  | 0.00047638 | 0.001954281 |
| Arnt2       | 48  | 14.78924808 | 13.94205574 | -0.847192336 | 0.00047698 | 0.001956163 |
| Thg1l       | 13  | 1.545779985 | 2.244756531 | 0.698976546  | 0.00047832 | 0.001961117 |
| Smo         | 52  | 1.853550972 | 1.469955857 | -0.383595115 | 0.00048231 | 0.001976924 |
| Nlrp5       | 2   | 68.69172354 | 57.4719878  | -11.21973574 | 0.00048353 | 0.001981361 |
| Frmpd1      | 72  | 1.874357487 | 1.207786765 | -0.666570722 | 0.00048405 | 0.001982937 |
| Klk9        | 10  | 93.89825663 | 89.98042885 | -3.91782778  | 0.00048757 | 0.001996265 |
| Rgcc        | 38  | 2.807821081 | 1.878615637 | -0.929205445 | 0.00048747 | 0.001996265 |
| Cbx7        | 56  | 1.426624027 | 1.057067592 | -0.369556435 | 0.00048958 | 0.002003931 |
| Abhd17c     | 121 | 1.014228117 | 1.274921281 | 0.260693164  | 0.00049943 | 0.002043677 |
| Mis18bp1    | 55  | 1.39279504  | 0.832630812 | -0.560164229 | 0.00050192 | 0.002053311 |
| Peg3        | 8   | 72.52306101 | 76.87145673 | 4.348395724  | 0.00050253 | 0.002055199 |
| Gal3st3     | 16  | 38.19808241 | 40.88252946 | 2.684447053  | 0.00050395 | 0.002060438 |
| Dcxr        | 27  | 2.491342668 | 1.798263992 | -0.693078676 | 0.000505   | 0.002064188 |
| Brcc3       | 5   | 23.5443038  | 12.64705882 | -10.89724497 | 0.00050521 | 0.002064471 |
| Eps8        | 44  | 1.615878969 | 1.170027204 | -0.445851764 | 0.00050749 | 0.002073209 |
| H2-BI       | 20  | 16.48918634 | 18.07428795 | 1.585101613  | 0.00050781 | 0.002073932 |
| I25401B19F  | 3   | 83.3972751  | 86.95780185 | 3.560526754  | 0.00050895 | 0.002077983 |
| Irx3        | 73  | 2.383140773 | 1.727999543 | -0.65514123  | 0.00051385 | 0.002097423 |
| Kctd7       | 39  | 4.081778367 | 5.120616631 | 1.038838264  | 0.00051495 | 0.002101312 |
| Polr3e      | 65  | 1.006321967 | 1.392068976 | 0.385747009  | 0.00051874 | 0.002116219 |

|            |     |             |             |              |            |             |
|------------|-----|-------------|-------------|--------------|------------|-------------|
| Ube2t      | 2   | 5.519480519 | 1.143647103 | -4.375833416 | 0.00052896 | 0.00215731  |
| Gm266      | 73  | 27.55151639 | 29.18297016 | 1.631453765  | 0.00053126 | 0.002166083 |
| Fbxo36     | 43  | 1.553470198 | 1.4716593   | -0.081810898 | 0.00053231 | 0.002169766 |
| Prnd       | 4   | 33.41880342 | 27.45772947 | -5.96107395  | 0.00053333 | 0.002173306 |
| St8sia4    | 15  | 7.048225219 | 10.32115489 | 3.272929673  | 0.00053517 | 0.002180181 |
| Prom2      | 23  | 17.97542906 | 21.2803971  | 3.304968034  | 0.00054262 | 0.002209957 |
| Ube2i      | 37  | 0.645504411 | 1.406768051 | 0.76126364   | 0.00054564 | 0.002221626 |
| Gm15816    | 20  | 5.084894893 | 3.977054471 | -1.107840422 | 0.00054601 | 0.00222253  |
| Stx1a      | 34  | 2.473617818 | 2.018841653 | -0.454776166 | 0.00054649 | 0.00222385  |
| Neurod2    | 10  | 46.70900595 | 51.96469378 | 5.255687828  | 0.00054973 | 0.002236419 |
| Parp8      | 66  | 1.477630271 | 0.97035699  | -0.507273282 | 0.00055149 | 0.00224293  |
| Tbl1xr1    | 129 | 1.767272841 | 1.44551867  | -0.321754171 | 0.0005589  | 0.002272458 |
| Ctnn       | 1   | 38.0952381  | 21.32701422 | -16.76822388 | 0.00055946 | 0.002274109 |
| Zfhx3      | 77  | 3.937076192 | 2.744473414 | -1.192602777 | 0.00055997 | 0.002275532 |
| Fam212b    | 22  | 2.256616269 | 1.520310528 | -0.736305741 | 0.00056374 | 0.002290231 |
| 700026L06F | 18  | 5.416374773 | 3.073312646 | -2.343062127 | 0.00056398 | 0.002290594 |
| Tlx2       | 78  | 16.21683773 | 18.54931588 | 2.332478144  | 0.0005655  | 0.002296118 |
| Ppp4r4     | 104 | 5.927860373 | 5.626740385 | -0.301119987 | 0.00056603 | 0.002297632 |
| 33413J09R  | 2   | 15.69767442 | 5.140186916 | -10.5574875  | 0.00057018 | 0.00231384  |
| Zfp354c    | 11  | 2.643848457 | 1.627384514 | -1.016463943 | 0.00057292 | 0.002324315 |
| Rbbp8nl    | 16  | 81.66120303 | 80.09430236 | -1.566900664 | 0.00057602 | 0.002336235 |
| 30430F08F  | 22  | 1.546298944 | 2.116520999 | 0.570222055  | 0.00057907 | 0.002347962 |
| Cpt1c      | 4   | 16.3015577  | 9.276220231 | -7.02533747  | 0.00058561 | 0.002373815 |
| Araf       | 10  | 21.2671586  | 17.03441643 | -4.232742168 | 0.00058704 | 0.00237898  |
| Mir7018    | 5   | 95.08653651 | 91.41483211 | -3.6717044   | 0.00058744 | 0.002379928 |
| 33406O09F  | 1   | 35.36585366 | 15.6626506  | -19.70320306 | 0.00058955 | 0.002387809 |
| Lhx5       | 52  | 20.68316732 | 24.01632694 | 3.333159619  | 0.00058997 | 0.002388841 |
| Arg2       | 24  | 4.767596835 | 3.042345457 | -1.725251378 | 0.00059202 | 0.00239649  |
| Fbn1       | 24  | 18.84908778 | 18.56133604 | -0.287751732 | 0.00059905 | 0.002424279 |
| Krt75      | 9   | 73.26811564 | 65.50410919 | -7.764006446 | 0.0006024  | 0.002437189 |
| Morn4      | 5   | 7.306704659 | 3.966165236 | -3.340539423 | 0.00060639 | 0.00245262  |
| '00067K01F | 30  | 95.29342186 | 95.79225265 | 0.498830782  | 0.00061197 | 0.00247453  |
| Mir9-1     | 13  | 39.72975188 | 48.90415538 | 9.174403507  | 0.00061295 | 0.002477815 |
| Gm7854     | 35  | 2.147490428 | 1.352322741 | -0.795167688 | 0.00061714 | 0.002494063 |

|            |    |             |             |              |            |             |
|------------|----|-------------|-------------|--------------|------------|-------------|
| Upk1a      | 2  | 29.56785663 | 41.07360793 | 11.50575131  | 0.00061811 | 0.002496673 |
| !10032G03F | 18 | 20.13722834 | 16.46433016 | -3.672898181 | 0.00061813 | 0.002496673 |
| !10417A02F | 4  | 34.94889084 | 26.73984825 | -8.209042583 | 0.00061931 | 0.002500751 |
| Col9a3     | 35 | 22.78510121 | 25.16187414 | 2.37677293   | 0.00062084 | 0.002506239 |
| Gm41       | 3  | 82.67556973 | 74.77517952 | -7.90039021  | 0.00062317 | 0.002514971 |
| Atp6v1c2   | 20 | 7.612592033 | 13.25443719 | 5.641845155  | 0.00062721 | 0.002530572 |
| Gdf1       | 9  | 63.614954   | 58.41701413 | -5.197939873 | 0.00063174 | 0.002548138 |
| Tbx4       | 10 | 34.24828213 | 30.62565017 | -3.622631955 | 0.0006403  | 0.002581974 |
| Gm11981    | 1  | 98.8372093  | 92          | -6.837209302 | 0.00064958 | 0.002618648 |
| Pdcd6ip    | 59 | 2.525549141 | 1.345466494 | -1.180082647 | 0.00065133 | 0.002625009 |
| !30043K22F | 9  | 10.81478886 | 14.95790497 | 4.143116105  | 0.00065447 | 0.002636924 |
| Golga7b    | 41 | 25.08908772 | 24.07676868 | -1.012319035 | 0.00065501 | 0.002638399 |
| Tbx10      | 2  | 81.21216244 | 72.51863144 | -8.693531002 | 0.0006565  | 0.002643647 |
| Trim14     | 16 | 13.48949954 | 12.9306118  | -0.558887735 | 0.00065776 | 0.002647498 |
| Ace        | 46 | 5.158227878 | 3.652903304 | -1.505324574 | 0.00065782 | 0.002647498 |
| Cryl1      | 18 | 2.725631083 | 1.409198751 | -1.316432332 | 0.00065832 | 0.002648799 |
| Gm2027     | 1  | 49.31506849 | 63.20541761 | 13.89034911  | 0.000666   | 0.002678975 |
| Ptk7       | 42 | 1.443525667 | 1.22047365  | -0.223052018 | 0.00066879 | 0.002689465 |
| Mtftp1     | 27 | 2.404731499 | 1.673865272 | -0.730866227 | 0.00067124 | 0.002698575 |
| Dlg3       | 34 | 30.65155175 | 26.87805678 | -3.773494964 | 0.0006754  | 0.002714569 |
| Elfn2      | 75 | 30.55272397 | 31.94088924 | 1.388165264  | 0.00067796 | 0.002724107 |
| Slc9a9     | 2  | 49.75474684 | 66.7733523  | 17.01860546  | 0.00067904 | 0.002727698 |
| Dnase1l1   | 8  | 16.83653794 | 11.75961569 | -5.076922249 | 0.00068316 | 0.00274349  |
| '00020D05F | 17 | 91.28477166 | 91.7746631  | 0.489891434  | 0.00068485 | 0.002749499 |
| Ofd1       | 32 | 13.95148386 | 11.92193134 | -2.029552525 | 0.00068513 | 0.002749889 |
| Gabrg1     | 4  | 45.75688354 | 56.99891405 | 11.24203051  | 0.00069117 | 0.00277336  |
| Fads2      | 55 | 3.481156969 | 2.548105978 | -0.933050991 | 0.0006925  | 0.002777951 |
| Bche       | 1  | 13.91752577 | 4.210526316 | -9.706999457 | 0.00069768 | 0.002797955 |
| Kcnmb4     | 92 | 2.629082611 | 4.155992847 | 1.526910236  | 0.00069972 | 0.002805363 |
| Samd12     | 3  | 8.714247527 | 3.459119497 | -5.255128031 | 0.00070046 | 0.002807599 |
| Hsd17b6    | 1  | 100         | 90.43478261 | -9.565217391 | 0.000702   | 0.002812981 |
| Gemin8     | 12 | 17.64415409 | 13.92800112 | -3.716152973 | 0.00070379 | 0.002819374 |
| Zfp85      | 8  | 3.463673182 | 1.965003431 | -1.498669751 | 0.00070454 | 0.002821634 |
| Ndufa1     | 27 | 19.44642727 | 16.9615308  | -2.484896466 | 0.00070694 | 0.002830449 |

|            |     |             |             |              |            |             |
|------------|-----|-------------|-------------|--------------|------------|-------------|
| Usp38      | 88  | 1.825038933 | 1.448482193 | -0.37655674  | 0.00070809 | 0.00283429  |
| Zfp618     | 116 | 1.447059389 | 1.724391441 | 0.277332052  | 0.00070864 | 0.002835411 |
| Zfpm2      | 67  | 1.866529051 | 1.325703355 | -0.540825696 | 0.00070876 | 0.002835411 |
| Prkce      | 124 | 1.497024474 | 1.146115867 | -0.350908607 | 0.00071398 | 0.002855549 |
| Dnm1       | 40  | 2.239546192 | 1.726610666 | -0.512935527 | 0.00071718 | 0.002867548 |
| I33428G20F | 82  | 96.28448315 | 96.89239526 | 0.607912107  | 0.00071763 | 0.002868582 |
| Mir7230    | 7   | 71.10669232 | 64.87436989 | -6.232322427 | 0.00071802 | 0.002869353 |
| Colgalt1   | 16  | 3.012102194 | 1.268186956 | -1.743915238 | 0.00072007 | 0.002876749 |
| Pdpdf      | 13  | 3.620394376 | 0.84058795  | -2.779806426 | 0.00072173 | 0.002882591 |
| Mboat7     | 21  | 0.723882433 | 1.453384492 | 0.729502059  | 0.00072303 | 0.002887013 |
| Phc1       | 83  | 1.856676289 | 1.271853995 | -0.584822294 | 0.00072545 | 0.002895875 |
| Tdgf1      | 6   | 70.50995025 | 64.55202482 | -5.957925427 | 0.00072851 | 0.002907316 |
| Zmynd15    | 16  | 2.754641067 | 1.636736523 | -1.117904544 | 0.00073447 | 0.002930278 |
| Fam92b     | 2   | 25.68741407 | 13.95819093 | -11.72922314 | 0.00074038 | 0.002953084 |
| Cnr2       | 1   | 77.96610169 | 58.20895522 | -19.75714647 | 0.00074548 | 0.002972611 |
| Arg1       | 4   | 28.09906103 | 22.06450265 | -6.034558375 | 0.00074945 | 0.002987096 |
| C1ql1      | 90  | 28.51300276 | 30.4433056  | 1.930302835  | 0.00074952 | 0.002987096 |
| I30068K23F | 4   | 41.0939178  | 31.84785092 | -9.24606688  | 0.00075948 | 0.003025978 |
| Card6      | 3   | 3.774348023 | 1.096965522 | -2.677382501 | 0.00076509 | 0.003047477 |
| Cep41      | 17  | 1.858540609 | 1.420703307 | -0.437837301 | 0.00076878 | 0.003061351 |
| Srcin1     | 69  | 3.976424131 | 3.075366595 | -0.901057536 | 0.00077955 | 0.003103408 |
| Adcy8      | 30  | 5.096331042 | 6.288650215 | 1.192319172  | 0.00078187 | 0.003111798 |
| Zkscan16   | 3   | 43.38659813 | 54.67054901 | 11.28395088  | 0.00079168 | 0.003149985 |
| I30556N09F | 3   | 95.10703364 | 86.13731053 | -8.969723106 | 0.00079464 | 0.003160902 |
| Grm7       | 28  | 59.3338935  | 61.90792467 | 2.574031172  | 0.000795   | 0.003161469 |
| Aoc3       | 2   | 84.10748177 | 72.40147783 | -11.70600394 | 0.00079696 | 0.003168403 |
| Gart       | 61  | 1.705509395 | 1.166211957 | -0.539297439 | 0.00079939 | 0.003177212 |
| Fut4       | 21  | 3.351079734 | 2.503330848 | -0.847748886 | 0.00080388 | 0.003194206 |
| Brinp1     | 26  | 56.18367012 | 58.76345265 | 2.579782523  | 0.00080722 | 0.003206578 |
| Spaca1     | 4   | 89.8281062  | 82.86516854 | -6.962937662 | 0.00081049 | 0.003218712 |
| Gm11744    | 4   | 78.15741306 | 70.10739398 | -8.050019081 | 0.00081352 | 0.003229872 |
| Chad       | 21  | 52.0185158  | 47.91558657 | -4.102929221 | 0.0008153  | 0.00323607  |
| Krt76      | 5   | 84.01290853 | 77.76179336 | -6.251115165 | 0.00081683 | 0.003241242 |
| Klf5       | 50  | 1.371638741 | 0.803323939 | -0.568314803 | 0.00082617 | 0.003277429 |

|           |    |             |             |              |            |             |
|-----------|----|-------------|-------------|--------------|------------|-------------|
| Gna15     | 4  | 18.27501103 | 24.35855382 | 6.083542787  | 0.00082989 | 0.003291289 |
| Spata24   | 13 | 7.760094077 | 4.764015645 | -2.996078431 | 0.00083464 | 0.003309042 |
| Rbm48     | 30 | 3.807115385 | 2.261659913 | -1.545455471 | 0.00083481 | 0.003309042 |
| Fgf15     | 46 | 10.96483425 | 10.83954441 | -0.125289846 | 0.00084089 | 0.00333132  |
| Htr7      | 95 | 16.17270871 | 15.43481845 | -0.737890258 | 0.00084073 | 0.00333132  |
| 33412C05F | 7  | 6.971135016 | 5.238989209 | -1.732145807 | 0.00084589 | 0.003350216 |
| Efcab12   | 4  | 27.10409194 | 19.91718832 | -7.186903621 | 0.00086252 | 0.003415165 |
| Krt23     | 7  | 23.49142182 | 34.74062357 | 11.24920175  | 0.00086966 | 0.003441593 |
| Pcdhga8   | 11 | 80.11352612 | 75.31269214 | -4.800833985 | 0.00086964 | 0.003441593 |
| Lrif1     | 18 | 5.009148631 | 6.195325641 | 1.18617701   | 0.00087459 | 0.003460157 |
| Fam221a   | 22 | 4.473925212 | 6.028517127 | 1.554591915  | 0.00087824 | 0.003473657 |
| Mtus1     | 50 | 13.35840109 | 11.83512627 | -1.523274816 | 0.00088032 | 0.003480959 |
| lfrd2     | 12 | 1.742760263 | 1.264235843 | -0.47852442  | 0.00088421 | 0.003495406 |
| Taf1b     | 9  | 3.909903518 | 2.436272249 | -1.473631269 | 0.00088462 | 0.003496054 |
| Far2      | 8  | 7.330045363 | 4.639364464 | -2.690680898 | 0.00088498 | 0.003496548 |
| Prdm14    | 9  | 39.1534305  | 33.77877169 | -5.374658807 | 0.0008936  | 0.003529228 |
| Sned1     | 51 | 2.175876171 | 1.822657826 | -0.353218345 | 0.00089373 | 0.003529228 |
| Dcaf15    | 50 | 6.175951525 | 4.273240852 | -1.902710673 | 0.00089424 | 0.003530271 |
| Tssk3     | 4  | 76.00555894 | 79.94151982 | 3.935960878  | 0.00089663 | 0.003538755 |
| Gm5478    | 1  | 44.62809917 | 24.3697479  | -20.25835127 | 0.00090463 | 0.003569394 |
| Tktl2     | 10 | 95.29988573 | 92.77490077 | -2.524984953 | 0.0009158  | 0.003612472 |
| Rprl3     | 10 | 48.48581368 | 44.07742715 | -4.408386529 | 0.00091661 | 0.003614711 |
| Clpsl2    | 7  | 76.346799   | 69.5861504  | -6.760648601 | 0.00091807 | 0.003619481 |
| Rab3b     | 22 | 22.31482973 | 21.18284054 | -1.131989189 | 0.00091898 | 0.003622106 |
| Mturn     | 57 | 0.992491081 | 1.588852146 | 0.596361065  | 0.00092909 | 0.003660975 |
| Entpd6    | 44 | 1.324665    | 1.901779375 | 0.577114375  | 0.00093034 | 0.003664912 |
| Ccdc42    | 3  | 62.51870919 | 56.37796888 | -6.140740307 | 0.00093263 | 0.003672947 |
| Grik5     | 24 | 11.55058431 | 9.96678479  | -1.583799524 | 0.00093809 | 0.003693479 |
| Rasip1    | 3  | 85.00792039 | 78.45129161 | -6.556628783 | 0.00093907 | 0.003696336 |
| CK137956  | 15 | 50.83188723 | 54.66106548 | 3.829178248  | 0.00094008 | 0.003699308 |
| Eml1      | 85 | 5.96080776  | 5.507129614 | -0.453678146 | 0.00094484 | 0.003717047 |
| Prdx6     | 23 | 0.997168116 | 1.601169338 | 0.604001222  | 0.0009491  | 0.003732802 |
| Map3k9    | 87 | 1.473669398 | 1.962472214 | 0.488802816  | 0.00094956 | 0.003733603 |
| Mir6407   | 3  | 96.3697073  | 99.43181818 | 3.062110879  | 0.00095014 | 0.003734877 |

|            |     |             |             |              |            |             |
|------------|-----|-------------|-------------|--------------|------------|-------------|
| AI507597   | 6   | 79.53336331 | 73.75879702 | -5.774566283 | 0.00095691 | 0.003760505 |
| Zeb2       | 51  | 1.033288224 | 1.500679202 | 0.467390978  | 0.00095988 | 0.003771158 |
| Slc2a9     | 8   | 32.42446781 | 28.65353741 | -3.770930401 | 0.00096021 | 0.003771441 |
| Efna3      | 26  | 3.092674641 | 2.007122158 | -1.085552483 | 0.0009612  | 0.003773826 |
| Ar         | 7   | 24.60170226 | 32.28510174 | 7.683399486  | 0.00096133 | 0.003773826 |
| Tyro3      | 109 | 1.734585351 | 1.283937567 | -0.450647785 | 0.00096793 | 0.003798715 |
| Trpm7      | 55  | 1.461944812 | 1.590770215 | 0.128825403  | 0.00098267 | 0.003855551 |
| Pir        | 6   | 32.279311   | 26.72679595 | -5.552515051 | 0.00098519 | 0.003864379 |
| Evc2       | 1   | 29.67032967 | 10.89108911 | -18.77924056 | 0.00099268 | 0.003892747 |
| Farp1      | 135 | 2.880627626 | 1.536710002 | -1.343917624 | 0.00099829 | 0.003913662 |
| Gm3716     | 5   | 19.72618523 | 14.58029316 | -5.145892074 | 0.00100153 | 0.003925333 |
| Slc25a41   | 6   | 63.48888655 | 53.8950228  | -9.593863756 | 0.00100558 | 0.003940163 |
| Gm44       | 2   | 75.43103448 | 64.81516057 | -10.61587392 | 0.00101297 | 0.003968039 |
| Zrsr1      | 23  | 82.40985229 | 85.92356052 | 3.513708231  | 0.00101574 | 0.003977822 |
| Smc1a      | 8   | 29.24130664 | 20.702267   | -8.539039639 | 0.00101857 | 0.003987873 |
| Celf4      | 36  | 2.34237199  | 1.599397363 | -0.742974627 | 0.00102642 | 0.004017512 |
| Igflr1     | 9   | 90.84470683 | 87.15058492 | -3.694121912 | 0.00102816 | 0.004023258 |
| Cubn       | 5   | 35.0126045  | 40.83785628 | 5.825251778  | 0.00103209 | 0.004037564 |
| Ltbp1      | 72  | 4.531408673 | 3.803634868 | -0.727773805 | 0.00103247 | 0.004037978 |
| '00113H08F | 7   | 19.5564724  | 16.32048425 | -3.235988145 | 0.00103682 | 0.004053893 |
| Vangl2     | 56  | 2.783831055 | 3.705818318 | 0.921987263  | 0.00104203 | 0.004073188 |
| Loxhd1     | 8   | 80.91384412 | 72.92205438 | -7.991789746 | 0.00105129 | 0.004108305 |
| Dact3      | 34  | 3.391867946 | 2.62334304  | -0.768524906 | 0.00105348 | 0.004115753 |
| Dok3       | 10  | 58.00550949 | 54.51773317 | -3.487776318 | 0.00105586 | 0.004123971 |
| Bin3       | 25  | 1.925844866 | 1.171622048 | -0.754222818 | 0.00105954 | 0.004137219 |
| Arhgef5    | 42  | 2.426795713 | 2.063312983 | -0.36348273  | 0.00106152 | 0.004143834 |
| Nrsn2      | 18  | 37.64772572 | 36.06782915 | -1.579896571 | 0.00106195 | 0.004144422 |
| Hmgb1-rs17 | 6   | 82.47950089 | 79.82221083 | -2.657290062 | 0.0010666  | 0.004160026 |
| Dpy19l3    | 34  | 2.380139925 | 1.415668229 | -0.964471696 | 0.0010668  | 0.004160026 |
| Mir3057    | 6   | 95.7581572  | 92.38337159 | -3.374785604 | 0.00106667 | 0.004160026 |
| Nr1h3      | 13  | 4.627079371 | 3.269683084 | -1.357396287 | 0.00106883 | 0.004166864 |
| Pde10a     | 70  | 21.71958852 | 23.52146674 | 1.801878222  | 0.00107143 | 0.004175879 |
| Rab19      | 3   | 18.36734694 | 8.441606398 | -9.925740541 | 0.00107226 | 0.004177987 |
| Dab2       | 6   | 6.381995382 | 3.019024936 | -3.362970447 | 0.00107553 | 0.004189621 |

|            |    |             |             |              |            |             |
|------------|----|-------------|-------------|--------------|------------|-------------|
| Pdf        | 57 | 0.72728412  | 0.952186504 | 0.224902385  | 0.00109875 | 0.004278931 |
| Emilin3    | 69 | 28.55188899 | 30.35472769 | 1.802838702  | 0.00110018 | 0.004282241 |
| Fam89a     | 61 | 6.934593298 | 6.258682321 | -0.675910977 | 0.0011     | 0.004282241 |
| Notch3     | 13 | 13.51018053 | 16.68471772 | 3.174537188  | 0.00110787 | 0.004311039 |
| Fkbp9      | 47 | 1.712193918 | 1.405506934 | -0.306686984 | 0.0011092  | 0.004315048 |
| Mir1948    | 2  | 77.47274323 | 69.14167694 | -8.331066296 | 0.00111659 | 0.004342043 |
| Igfbp2     | 46 | 13.31509209 | 16.87300659 | 3.557914499  | 0.00111673 | 0.004342043 |
| Hypk       | 16 | 1.021417698 | 0.436964274 | -0.584453425 | 0.00112519 | 0.004373795 |
| Chmp4c     | 12 | 5.463800269 | 3.353395229 | -2.110405041 | 0.00112735 | 0.004381039 |
| Kcnmb4os2  | 9  | 9.706554893 | 13.94323846 | 4.236683572  | 0.00113725 | 0.004418321 |
| Rnf112     | 5  | 15.54477387 | 10.71415623 | -4.830617643 | 0.00114304 | 0.004439637 |
| Lrrc74a    | 3  | 85.75498575 | 77.59489303 | -8.160092725 | 0.00114418 | 0.004442895 |
| Aph1c      | 18 | 1.994315474 | 4.056539702 | 2.062224228  | 0.00114944 | 0.004462151 |
| Limk2      | 79 | 11.86991855 | 12.94777042 | 1.07785187   | 0.00115609 | 0.004486766 |
| Crygn      | 8  | 82.53221341 | 79.91521432 | -2.616999083 | 0.00115783 | 0.004492332 |
| Stoml1     | 14 | 2.041076456 | 0.962608515 | -1.07846794  | 0.00116218 | 0.004508008 |
| Adm        | 2  | 7.09201568  | 2.817041115 | -4.274974565 | 0.00116252 | 0.004508163 |
| Kcnn4      | 1  | 6.756756757 | 1.204819277 | -5.55193748  | 0.00116424 | 0.00451362  |
| Ildr2      | 44 | 0.824515602 | 1.347686736 | 0.523171133  | 0.00116801 | 0.004527031 |
| Dlg5       | 76 | 2.267439271 | 1.83980821  | -0.427631061 | 0.0011688  | 0.004528889 |
| Cdkn1c     | 6  | 32.55060729 | 41.16280659 | 8.612199299  | 0.00118099 | 0.004574934 |
| Erich6     | 8  | 16.5745029  | 19.38732406 | 2.81282116   | 0.00118658 | 0.004595386 |
| Ints1      | 44 | 1.93385014  | 1.341057087 | -0.592793054 | 0.00119019 | 0.004608128 |
| Bcl11a     | 63 | 12.38936157 | 11.5634468  | -0.82591477  | 0.00119431 | 0.004622879 |
| Rgs2       | 17 | 1.439815111 | 0.671428896 | -0.768386215 | 0.00119739 | 0.004633554 |
| Dhh        | 23 | 7.495666446 | 4.666224402 | -2.829442044 | 0.00119905 | 0.004638783 |
| Ero1lb     | 47 | 1.836389974 | 1.130039072 | -0.706350901 | 0.00120541 | 0.004662161 |
| Lysmd2     | 74 | 4.005911449 | 1.983017507 | -2.022893941 | 0.00121009 | 0.004678996 |
| Nmu        | 14 | 32.46508775 | 29.94204088 | -2.523046864 | 0.00121493 | 0.004695623 |
| Mthfr      | 22 | 4.839285734 | 2.744284149 | -2.095001584 | 0.00121503 | 0.004695623 |
| Cbr3       | 47 | 2.981241132 | 2.426626408 | -0.554614724 | 0.00121541 | 0.004695886 |
| Crlf1      | 90 | 1.770823117 | 1.426627774 | -0.344195343 | 0.0012265  | 0.004737466 |
| IO0008C10F | 55 | 11.14764108 | 9.638909361 | -1.508731719 | 0.00122692 | 0.004737867 |
| Krt79      | 18 | 92.51459254 | 90.33033672 | -2.184255816 | 0.00123075 | 0.004751384 |



|            |     |             |             |              |            |             |
|------------|-----|-------------|-------------|--------------|------------|-------------|
| Nav2       | 85  | 11.17193454 | 12.42609495 | 1.254160411  | 0.00123544 | 0.004768247 |
| Arhgap39   | 50  | 11.19752162 | 8.577626989 | -2.619894635 | 0.00124339 | 0.004797671 |
| Man1b1     | 9   | 2.153239525 | 1.186100702 | -0.967138823 | 0.00124595 | 0.004805796 |
| Bpifb2     | 2   | 76.37280283 | 64.25062657 | -12.12217627 | 0.00124615 | 0.004805796 |
| Elmsan1    | 90  | 1.566073602 | 1.121357903 | -0.444715699 | 0.00124829 | 0.004812777 |
| Mavs       | 9   | 3.990618046 | 1.801728548 | -2.188889498 | 0.00125152 | 0.004823948 |
| Hepacam    | 2   | 95.32286599 | 87.3538961  | -7.968969885 | 0.00125312 | 0.004828866 |
| Arrdc1     | 27  | 9.454174729 | 7.475094148 | -1.979080582 | 0.00125405 | 0.004831188 |
| Ndufa11    | 21  | 1.717645356 | 1.086505314 | -0.631140043 | 0.00126295 | 0.004864177 |
| Ttyh2      | 39  | 1.91549173  | 1.356893285 | -0.558598444 | 0.00127216 | 0.004898348 |
| Wnk2       | 58  | 17.87673275 | 20.96660638 | 3.089873632  | 0.00127529 | 0.004909149 |
| Gm6654     | 7   | 98.020688   | 94.1327736  | -3.8879144   | 0.00127945 | 0.004923837 |
| Ispd       | 38  | 1.584341696 | 1.152615431 | -0.431726264 | 0.00128382 | 0.004939375 |
| Syt15      | 34  | 19.26491994 | 18.84403135 | -0.420888595 | 0.0012853  | 0.004943768 |
| Psma8      | 8   | 65.30689184 | 71.35438638 | 6.047494539  | 0.00128853 | 0.004954912 |
| Lypd8      | 2   | 55.52723497 | 43.07152665 | -12.45570832 | 0.00128932 | 0.00495665  |
| Rnf130     | 50  | 1.146419617 | 1.775469263 | 0.629049647  | 0.00129367 | 0.004972059 |
| Trdmt1     | 26  | 1.784764149 | 1.235327213 | -0.549436936 | 0.00129832 | 0.00498864  |
| Mfng       | 4   | 21.39590447 | 15.63073674 | -5.76516773  | 0.00130614 | 0.005017372 |
| Gfra3      | 14  | 28.56628978 | 26.56384228 | -2.002447499 | 0.00131402 | 0.005046297 |
| Shc1       | 19  | 8.069075119 | 5.8046298   | -2.264445319 | 0.00133119 | 0.005110909 |
| Tmem47     | 23  | 53.44886874 | 56.29956938 | 2.850700636  | 0.00133333 | 0.005117782 |
| Shf        | 36  | 2.780912946 | 1.708044842 | -1.072868104 | 0.00133455 | 0.005121115 |
| Tmem9      | 15  | 8.41433929  | 6.887137109 | -1.52720218  | 0.00133698 | 0.00512911  |
| Fam63b     | 51  | 1.282880198 | 0.718297947 | -0.564582251 | 0.00135357 | 0.005191406 |
| 130411K18F | 7   | 94.78234528 | 90.52223298 | -4.260112305 | 0.00135508 | 0.00519584  |
| Tmem37     | 20  | 3.466088148 | 1.404702793 | -2.061385355 | 0.00135799 | 0.00520561  |
| Ccng2      | 41  | 1.812254958 | 1.15626121  | -0.655993748 | 0.00136679 | 0.005235276 |
| Col4a2     | 36  | 1.680554519 | 1.058369159 | -0.62218536  | 0.00136668 | 0.005235276 |
| Cebpa      | 105 | 1.510391696 | 1.094555921 | -0.415835774 | 0.00136628 | 0.005235276 |
| Rnf224     | 4   | 84.90471229 | 89.4905098  | 4.585797508  | 0.00137111 | 0.005250435 |
| Mtnr1a     | 10  | 11.06109909 | 15.66398767 | 4.602888579  | 0.00137393 | 0.005259872 |
| Acss2os    | 2   | 95.11452242 | 90.25       | -4.864522417 | 0.00137613 | 0.005266915 |
| Fam110c    | 23  | 2.681047977 | 1.735001405 | -0.946046572 | 0.00137947 | 0.005278299 |

|            |    |             |             |              |            |             |
|------------|----|-------------|-------------|--------------|------------|-------------|
| Dhrs11     | 45 | 1.478546707 | 0.841332672 | -0.637214035 | 0.0013812  | 0.005283556 |
| '00001K23F | 2  | 77.27272727 | 61.50956768 | -15.76315959 | 0.00138547 | 0.005298508 |
| Mir3102    | 8  | 89.09167471 | 83.50824234 | -5.583432365 | 0.00138763 | 0.005305391 |
| Olfcr215   | 3  | 59.45372865 | 49.72376048 | -9.729968177 | 0.00139247 | 0.00532249  |
| Casr       | 4  | 47.981801   | 54.76226948 | 6.780468478  | 0.00140759 | 0.005378887 |
| Pnlnc1     | 13 | 95.014164   | 96.4315724  | 1.417408395  | 0.00140946 | 0.005384634 |
| Crb3       | 27 | 4.367722363 | 2.881398638 | -1.486323725 | 0.00141557 | 0.00540658  |
| Cxcr2      | 1  | 90.75630252 | 75.78125    | -14.97505252 | 0.001417   | 0.005410634 |
| Cbln1      | 40 | 52.33686628 | 54.14519554 | 1.808329258  | 0.00141986 | 0.005420139 |
| '00021N21F | 4  | 56.13680819 | 47.88839725 | -8.248410943 | 0.00142447 | 0.005436309 |
| Ccdc14     | 18 | 2.061004053 | 0.827425714 | -1.233578339 | 0.00142554 | 0.005438991 |
| Spata13    | 6  | 5.590280668 | 3.002219982 | -2.588060686 | 0.00142828 | 0.005448042 |
| Dgka       | 30 | 2.5181851   | 1.335587574 | -1.182597526 | 0.0014361  | 0.005476456 |
| Mesp2      | 18 | 34.90803881 | 30.91996939 | -3.98806942  | 0.00143789 | 0.005481853 |
| Zfp503     | 36 | 4.419037335 | 3.173499888 | -1.245537447 | 0.00145519 | 0.005546343 |
| Zranb2     | 84 | 1.278131399 | 0.971972835 | -0.306158564 | 0.0014559  | 0.005547613 |
| Filip1     | 6  | 13.74490749 | 9.847680387 | -3.897227108 | 0.00145808 | 0.005554495 |
| Pim2       | 35 | 15.76792253 | 13.84061801 | -1.927304521 | 0.00146028 | 0.005561426 |
| Hoxa7      | 2  | 19.14893617 | 36.76470588 | 17.61576971  | 0.00146272 | 0.005569284 |
| AU015836   | 5  | 82.75591892 | 75.94768665 | -6.808232279 | 0.00146482 | 0.005575822 |
| Tpd52l1    | 36 | 1.813226657 | 0.81610917  | -0.997117487 | 0.00149192 | 0.005677511 |
| Mapkapk3   | 18 | 7.386078277 | 5.223217004 | -2.162861273 | 0.00149512 | 0.005688207 |
| Cyp26c1    | 12 | 93.22698246 | 88.51594136 | -4.7110411   | 0.00150226 | 0.005713897 |
| Phc3       | 30 | 1.048213627 | 1.235498388 | 0.187284761  | 0.00150322 | 0.005716055 |
| Gm13090    | 15 | 94.40526814 | 90.98798513 | -3.417283016 | 0.0015044  | 0.005719077 |
| Naa10      | 6  | 30.47915959 | 22.66733823 | -7.811821366 | 0.00150651 | 0.00572561  |
| Wipf3      | 2  | 70.95709571 | 63.66159629 | -7.295499416 | 0.00152015 | 0.005775942 |
| Hmgb4      | 4  | 82.4857812  | 77.1459417  | -5.339839494 | 0.00152427 | 0.005790076 |
| Hr         | 24 | 2.159297443 | 1.427070619 | -0.732226824 | 0.00152486 | 0.005790848 |
| Artn       | 8  | 8.546948369 | 5.547529263 | -2.999419106 | 0.00152719 | 0.005798189 |
| Bud13      | 28 | 1.52030993  | 0.934910497 | -0.585399433 | 0.00152859 | 0.005801999 |
| Hmgn3      | 9  | 4.669183663 | 2.803674323 | -1.86550934  | 0.00154323 | 0.005856039 |
| Hfe        | 3  | 8.823547785 | 4.810631439 | -4.012916346 | 0.00155274 | 0.005890634 |
| Lrrc52     | 1  | 84.21052632 | 70.94017094 | -13.27035538 | 0.00155499 | 0.00589764  |

|           |     |             |             |              |            |             |
|-----------|-----|-------------|-------------|--------------|------------|-------------|
| Asb6      | 20  | 2.65373522  | 2.102994917 | -0.550740302 | 0.00156386 | 0.005929735 |
| Scly      | 31  | 11.79486396 | 10.64965641 | -1.145207552 | 0.00156497 | 0.005932399 |
| 30502E18F | 3   | 88.47883167 | 81.61588229 | -6.86294938  | 0.00158105 | 0.005991833 |
| Gm6815    | 1   | 64.46280992 | 45.13888889 | -19.32392103 | 0.00159331 | 0.006036733 |
| BC048507  | 15  | 87.05495628 | 83.69530503 | -3.359651248 | 0.00159615 | 0.006045927 |
| Ccdc37    | 12  | 21.91502781 | 22.42147239 | 0.506444581  | 0.00159882 | 0.006054469 |
| 30045A20F | 1   | 29.24528302 | 12.78195489 | -16.46332813 | 0.00160284 | 0.006068149 |
| Rbp4      | 60  | 1.611265156 | 1.35991782  | -0.251347335 | 0.00162476 | 0.006149544 |
| Kdm3b     | 53  | 2.251053798 | 1.750198341 | -0.500855457 | 0.00162857 | 0.006162343 |
| Spag6     | 17  | 8.053096587 | 10.90230072 | 2.849204137  | 0.00163474 | 0.006184121 |
| Mir93     | 1   | 66.66666667 | 55.63380282 | -11.03286385 | 0.00163823 | 0.006195709 |
| Pcif1     | 62  | 0.901296124 | 1.29005804  | 0.388761916  | 0.00164565 | 0.006222191 |
| Zcchc11   | 21  | 1.19384692  | 2.264438725 | 1.070591805  | 0.00165115 | 0.006241346 |
| Frat1     | 48  | 1.661071935 | 1.174679381 | -0.486392555 | 0.00165386 | 0.006249999 |
| Abhd13    | 43  | 0.816352805 | 1.124795046 | 0.308442242  | 0.00165654 | 0.006258505 |
| Apex2     | 16  | 18.22103763 | 22.00240462 | 3.781366988  | 0.0016577  | 0.006261302 |
| Prmt2     | 8   | 2.636507946 | 1.192262967 | -1.444244979 | 0.00166206 | 0.006276123 |
| Sptbn4    | 119 | 5.352003714 | 4.889969609 | -0.462034105 | 0.00166634 | 0.006290661 |
| Chrn4     | 17  | 8.37052872  | 7.052906253 | -1.317622467 | 0.00166728 | 0.006292594 |
| Asb5      | 3   | 97.164373   | 94.22717104 | -2.937201956 | 0.00167561 | 0.006322418 |
| Dhx15     | 55  | 1.191670186 | 0.775345431 | -0.416324755 | 0.00167945 | 0.006335265 |
| Rnf181    | 13  | 1.666757354 | 0.608798873 | -1.057958481 | 0.001685   | 0.006352935 |
| Tonsl     | 10  | 2.717709949 | 4.219054717 | 1.501344768  | 0.00168497 | 0.006352935 |
| Gsdmd     | 11  | 1.858939067 | 0.860651011 | -0.998288056 | 0.00169746 | 0.006398272 |
| Ints4     | 7   | 2.051566932 | 0.400534045 | -1.651032887 | 0.00169825 | 0.006399607 |
| Sf3b2     | 28  | 2.005191081 | 1.513072098 | -0.492118983 | 0.00170548 | 0.006425225 |
| Spo11     | 23  | 87.79847964 | 85.87250894 | -1.925970695 | 0.00172755 | 0.006506703 |
| Klhl10    | 4   | 95.91702377 | 91.38095238 | -4.536071393 | 0.00173823 | 0.006545239 |
| Dtnb      | 109 | 1.993911616 | 1.498378551 | -0.495533065 | 0.00174245 | 0.006559451 |
| Adra1a    | 2   | 10.85106383 | 19.90613553 | 9.055071701  | 0.00175023 | 0.006587036 |
| B3gnt1    | 12  | 2.933108345 | 2.004521875 | -0.92858647  | 0.0017541  | 0.00659991  |
| Tigd3     | 43  | 2.672236111 | 1.76419915  | -0.908036962 | 0.00175614 | 0.006605904 |
| Hoxb1     | 9   | 47.19126373 | 41.73622018 | -5.45504355  | 0.00177515 | 0.006675705 |
| Exoc8     | 95  | 1.01610503  | 1.138874321 | 0.122769291  | 0.00178722 | 0.006719374 |

|            |     |             |             |              |            |             |
|------------|-----|-------------|-------------|--------------|------------|-------------|
| Kcnma1     | 108 | 25.67043734 | 24.81106901 | -0.859368325 | 0.00180141 | 0.006770977 |
| BC026585   | 17  | 35.79104404 | 40.41845935 | 4.627415311  | 0.00181424 | 0.006817459 |
| Mir191     | 40  | 1.725336383 | 1.167992521 | -0.557343863 | 0.00182602 | 0.006859976 |
| Fbxo22     | 24  | 2.454150734 | 3.520390341 | 1.066239608  | 0.00182863 | 0.006867992 |
| Prodh2     | 2   | 74.70410628 | 64.27631402 | -10.42779226 | 0.00183396 | 0.006886249 |
| Catsper3   | 2   | 80.14308585 | 84.8605441  | 4.717458249  | 0.0018387  | 0.006902282 |
| Hspa14     | 34  | 2.112966738 | 1.562986335 | -0.549980403 | 0.00184049 | 0.006907259 |
| Tmem255b   | 6   | 6.43505451  | 10.25799412 | 3.822939607  | 0.00185692 | 0.006967133 |
| Tsc22d4    | 4   | 1.835045001 | 3.239285655 | 1.404240655  | 0.00186491 | 0.006995328 |
| Tox2       | 4   | 76.50335227 | 70.22874682 | -6.274605445 | 0.00187077 | 0.0070155   |
| Msx2       | 39  | 41.41082674 | 44.21621379 | 2.805387048  | 0.00187788 | 0.007040358 |
| P2ry14     | 1   | 78.8        | 65.87677725 | -12.92322275 | 0.00188513 | 0.007065733 |
| l30009N23F | 47  | 4.651097325 | 3.998872536 | -0.652224789 | 0.00189042 | 0.007083779 |
| Cartpt     | 15  | 26.25191604 | 28.85447595 | 2.602559914  | 0.0018936  | 0.007093865 |
| Cnga3      | 8   | 50.59835651 | 48.68316096 | -1.915195549 | 0.00189694 | 0.007104582 |
| Cebpb      | 124 | 3.699964407 | 2.887716651 | -0.812247756 | 0.00190486 | 0.007132411 |
| Slc9a3r2   | 55  | 1.172242184 | 0.887403076 | -0.284839108 | 0.00190707 | 0.007138848 |
| Elf5       | 3   | 27.64380536 | 20.19019644 | -7.45360892  | 0.00191093 | 0.007151494 |
| Rbbp7      | 19  | 17.11496126 | 13.69930845 | -3.415652807 | 0.00191389 | 0.007160751 |
| Xirp1      | 9   | 85.00861066 | 77.26783293 | -7.740777732 | 0.00192172 | 0.007186372 |
| Slc3a2     | 17  | 2.707878612 | 1.324820353 | -1.383058259 | 0.00192157 | 0.007186372 |
| Plekha2    | 44  | 3.593035875 | 1.736642672 | -1.856393203 | 0.00192735 | 0.007205577 |
| Elmo3      | 4   | 10.04746731 | 6.893296209 | -3.154171104 | 0.00193334 | 0.007226123 |
| Ndnf       | 42  | 10.59675969 | 10.9730845  | 0.37632481   | 0.00193817 | 0.007242355 |
| Zbtb46     | 131 | 2.521547422 | 2.048713572 | -0.47283385  | 0.00194176 | 0.007253899 |
| Lats1      | 61  | 1.004805907 | 1.339788049 | 0.334982142  | 0.00194787 | 0.007274419 |
| Cdk17      | 92  | 0.979220036 | 1.437351505 | 0.458131469  | 0.00194824 | 0.007274419 |
| Trappc1    | 14  | 2.373282536 | 0.934746471 | -1.438536064 | 0.00195173 | 0.007285583 |
| Pwp2       | 11  | 2.927985607 | 1.03473505  | -1.893250557 | 0.00197912 | 0.007385954 |
| l10001F23F | 23  | 41.68351125 | 37.80238542 | -3.881125828 | 0.00198576 | 0.007408872 |
| Ramp3      | 1   | 22.63157895 | 14.43514644 | -8.196432504 | 0.00200235 | 0.007468859 |
| Lrrc14     | 39  | 1.875979559 | 1.385238574 | -0.490740985 | 0.00201726 | 0.007522553 |
| Rarb       | 15  | 26.89094773 | 24.71269581 | -2.178251924 | 0.00202515 | 0.007550061 |
| Gjb4       | 6   | 40.14547361 | 35.28669056 | -4.858783055 | 0.00202691 | 0.007554715 |

|            |     |             |             |              |            |             |
|------------|-----|-------------|-------------|--------------|------------|-------------|
| Gm9199     | 8   | 93.33584934 | 90.30775943 | -3.028089905 | 0.00202915 | 0.007561149 |
| I30076C15F | 47  | 12.21179029 | 15.52815095 | 3.316360659  | 0.00203821 | 0.007591034 |
| I31409K22F | 2   | 80.95238095 | 65.11428571 | -15.83809524 | 0.00203805 | 0.007591034 |
| Gm38404    | 5   | 68.62120006 | 58.92496851 | -9.696231553 | 0.0020437  | 0.007609566 |
| Paqr5      | 21  | 15.49589357 | 13.39124585 | -2.104647716 | 0.00205467 | 0.007648464 |
| I30043L09F | 4   | 0.751633987 | 3.277943776 | 2.526309789  | 0.00205886 | 0.007662098 |
| Khdrbs3    | 122 | 57.32046706 | 58.85308312 | 1.532616059  | 0.00206134 | 0.007669405 |
| Gapdhs     | 4   | 14.96030213 | 13.7905054  | -1.169796727 | 0.00206475 | 0.007680124 |
| Skap1      | 9   | 34.52782608 | 31.33332085 | -3.194505233 | 0.0020713  | 0.007702566 |
| Mir3087    | 8   | 96.50323059 | 94.41439499 | -2.088835606 | 0.00207446 | 0.007710453 |
| Fbrs       | 8   | 92.8381636  | 94.85083056 | 2.012666963  | 0.00207448 | 0.007710453 |
| Rgs12      | 44  | 0.572330511 | 1.189050838 | 0.616720327  | 0.00209842 | 0.007797479 |
| Vwa5b2     | 11  | 5.105390767 | 7.339267931 | 2.233877164  | 0.00210777 | 0.007830237 |
| Lep        | 13  | 63.8453306  | 57.89283302 | -5.952497575 | 0.00214223 | 0.007956227 |
| Ddx42      | 18  | 1.736585125 | 1.124477823 | -0.612107302 | 0.00214473 | 0.007959482 |
| I33406K04F | 2   | 93.9516129  | 87.16216216 | -6.789450741 | 0.00214439 | 0.007959482 |
| Prkd2      | 1   | 5.166051661 | 0.977198697 | -4.188852963 | 0.00214445 | 0.007959482 |
| Ptpro      | 27  | 60.65902653 | 57.99838761 | -2.660638919 | 0.00214553 | 0.007960447 |
| Gpr26      | 15  | 50.81699171 | 48.45159065 | -2.365401059 | 0.00214625 | 0.007961084 |
| Aldh5a1    | 47  | 1.472379428 | 1.149906865 | -0.322472562 | 0.00215192 | 0.007980096 |
| Gng13      | 23  | 5.805835857 | 8.560141187 | 2.75430533   | 0.00217673 | 0.008070051 |
| Ankrd53    | 2   | 31.33611955 | 41.4519685  | 10.11584895  | 0.00218263 | 0.008089894 |
| Trmt10a    | 42  | 0.851959057 | 1.185880074 | 0.333921017  | 0.00219018 | 0.008115833 |
| Pygl       | 6   | 11.60632664 | 9.820542101 | -1.785784543 | 0.00219284 | 0.008123621 |
| I30487H11F | 3   | 93.73781078 | 96.64666222 | 2.908851435  | 0.00219755 | 0.00813902  |
| Anxa6      | 8   | 3.71132655  | 1.83379541  | -1.87753114  | 0.00221504 | 0.008201758 |
| Kcnb2      | 11  | 89.28039051 | 85.21779514 | -4.062595363 | 0.00222181 | 0.008224716 |
| I30024F11F | 20  | 2.185221237 | 1.44461961  | -0.740601626 | 0.00222426 | 0.008231711 |
| Ppp1r1b    | 42  | 7.534115037 | 9.044548711 | 1.510433675  | 0.00223349 | 0.008263806 |
| Sox6       | 40  | 39.20774392 | 37.78808601 | -1.419657904 | 0.00226124 | 0.008364381 |
| Pcdhgb5    | 3   | 60.33131224 | 64.84192288 | 4.510610637  | 0.00227021 | 0.00839435  |
| Cox6b2     | 8   | 56.75392682 | 52.61194938 | -4.141977443 | 0.00227049 | 0.00839435  |
| Fbn2       | 107 | 32.33528607 | 31.91924278 | -0.416043298 | 0.00227188 | 0.008396668 |
| Smim1      | 8   | 11.88662564 | 8.627020214 | -3.259605428 | 0.00227226 | 0.008396668 |

|            |     |             |             |              |            |             |
|------------|-----|-------------|-------------|--------------|------------|-------------|
| Bid        | 41  | 1.991142157 | 0.86162248  | -1.129519677 | 0.00227808 | 0.00841604  |
| Col1a2     | 4   | 23.90651993 | 16.64776985 | -7.258750086 | 0.00228384 | 0.008435202 |
| Col9a2     | 13  | 30.33439296 | 35.57902045 | 5.244627494  | 0.00228811 | 0.008448851 |
| Zfp389     | 2   | 6.14391336  | 1.724137931 | -4.419775429 | 0.00228921 | 0.008450794 |
| 330006101R | 1   | 52.94117647 | 26.98412698 | -25.95704949 | 0.00229044 | 0.008452015 |
| Elovl4     | 40  | 10.22815663 | 13.92923194 | 3.701075306  | 0.0022907  | 0.008452015 |
| Pcdh10     | 8   | 38.20482344 | 43.81200998 | 5.607186542  | 0.00229456 | 0.008464158 |
| Drp2       | 1   | 68.85245902 | 50.66666667 | -18.18579235 | 0.00230144 | 0.008487376 |
| Fam73a     | 13  | 2.040241477 | 1.26893594  | -0.771305537 | 0.00230531 | 0.008499509 |
| Lamc3      | 20  | 36.48911    | 39.62723062 | 3.138120628  | 0.00231476 | 0.008532215 |
| Cyp24a1    | 26  | 3.824688863 | 2.994503464 | -0.830185399 | 0.00233708 | 0.00861234  |
| 10524586   | 74  | 35.14572121 | 36.30745408 | 1.161732866  | 0.0023437  | 0.008632411 |
| Magix      | 4   | 79.83558128 | 69.83958175 | -9.995999534 | 0.0023432  | 0.008632411 |
| Wdr20      | 33  | 1.723411018 | 1.097082823 | -0.626328195 | 0.00234771 | 0.008645003 |
| Tspan13    | 41  | 2.786603999 | 2.00410158  | -0.782502419 | 0.00234919 | 0.008648275 |
| Ing1       | 171 | 8.163995846 | 7.626625569 | -0.537370277 | 0.00237892 | 0.00875552  |
| Hsp90aa1   | 81  | 0.839944122 | 1.120314324 | 0.280370203  | 0.00238768 | 0.008785578 |
| Ndufaf3    | 57  | 1.568562572 | 1.140974664 | -0.427587909 | 0.00238875 | 0.00878728  |
| Capn15     | 7   | 99.19335323 | 97.10789947 | -2.085453764 | 0.00239816 | 0.008819713 |
| Ogt        | 3   | 14.84363082 | 7.552391668 | -7.291239149 | 0.0024029  | 0.008834907 |
| Mras       | 53  | 1.888391919 | 1.342055809 | -0.54633611  | 0.00240681 | 0.008847063 |
| Bhlhb9     | 14  | 39.95626002 | 35.81725191 | -4.139008117 | 0.00240922 | 0.008853713 |
| Katnb1     | 11  | 3.973129983 | 1.659513448 | -2.313616535 | 0.00241379 | 0.008868306 |
| Krt74      | 1   | 87.94326241 | 72.54901961 | -15.3942428  | 0.00242821 | 0.008919019 |
| Htr2c      | 3   | 61.07244607 | 69.76447384 | 8.692027764  | 0.00246845 | 0.009064576 |
| Bsx        | 4   | 23.3902148  | 28.88369383 | 5.493479031  | 0.00247012 | 0.00906843  |
| Efna2      | 44  | 2.825315439 | 1.536719225 | -1.288596214 | 0.00247578 | 0.009086955 |
| Trim25     | 12  | 6.694140111 | 4.19917807  | -2.49496204  | 0.00248244 | 0.009109106 |
| Mboat4     | 5   | 78.12412081 | 72.32616217 | -5.797958634 | 0.00249219 | 0.009142594 |
| 700101E01F | 33  | 1.040068062 | 2.605328587 | 1.565260526  | 0.00249707 | 0.009156747 |
| Lif        | 44  | 4.851771351 | 3.815511173 | -1.036260179 | 0.00249729 | 0.009156747 |
| Slitrk3    | 6   | 46.39303772 | 51.1628564  | 4.769818684  | 0.00250073 | 0.009167037 |
| Dpysl5     | 14  | 13.53643588 | 17.96761592 | 4.431180035  | 0.0025038  | 0.009173736 |
| Fst        | 70  | 1.792699335 | 1.29614381  | -0.496555525 | 0.00250325 | 0.009173736 |

|           |    |             |             |              |            |             |
|-----------|----|-------------|-------------|--------------|------------|-------------|
| Focad     | 22 | 2.239668591 | 1.463107388 | -0.776561203 | 0.0025053  | 0.009176942 |
| Kcnip2    | 43 | 28.91224052 | 31.30867028 | 2.39642976   | 0.00252293 | 0.009239183 |
| Cpsf7     | 55 | 1.543374605 | 1.090790753 | -0.452583852 | 0.00252989 | 0.009262361 |
| Tubb4a    | 24 | 28.09152858 | 25.81329056 | -2.278238015 | 0.00253685 | 0.009285541 |
| Olfr328   | 1  | 96.15384615 | 85.03401361 | -11.11983255 | 0.00255696 | 0.009356815 |
| Zbtb4     | 43 | 2.109044752 | 1.603797134 | -0.505247618 | 0.0025671  | 0.00939157  |
| Pla1a     | 3  | 97.40544053 | 94.66996555 | -2.735474979 | 0.00257925 | 0.009433685 |
| Tbc1d16   | 36 | 2.558144413 | 1.768721158 | -0.789423255 | 0.00259226 | 0.009478893 |
| Moxd1     | 42 | 10.27569727 | 10.00046885 | -0.275228419 | 0.00259707 | 0.009494117 |
| Ak5       | 76 | 3.146437869 | 2.472828866 | -0.673609002 | 0.00260701 | 0.009528098 |
| Gm14858   | 4  | 37.1036036  | 48.69791667 | 11.59431306  | 0.00262422 | 0.009588614 |
| Airn      | 7  | 53.64940825 | 47.75134728 | -5.89806097  | 0.0026251  | 0.009589408 |
| Cd37      | 1  | 36.97916667 | 23.15270936 | -13.82645731 | 0.00263639 | 0.009628286 |
| Pgf       | 24 | 3.223783176 | 2.103437929 | -1.120345247 | 0.00264523 | 0.009658159 |
| Apoa4     | 4  | 96.14645981 | 93.08749415 | -3.058965657 | 0.00267687 | 0.009771253 |
| Grin2b    | 11 | 62.82765198 | 57.34171992 | -5.485932059 | 0.00270174 | 0.009859573 |
| Tnfsf13   | 4  | 15.14981525 | 9.529204815 | -5.620610431 | 0.00270592 | 0.009872361 |
| Bcl6b     | 14 | 2.743126471 | 3.075388121 | 0.33226165   | 0.00271129 | 0.009889498 |
| Stox1     | 35 | 1.505723905 | 2.972860761 | 1.467136856  | 0.00271579 | 0.009903469 |
| Klhdc8b   | 5  | 30.33084711 | 24.71857354 | -5.612273573 | 0.00271674 | 0.009904466 |
| 30011K09F | 5  | 30.64173044 | 24.3009996  | -6.340730843 | 0.00274814 | 0.010016437 |
| Usp53     | 61 | 1.081629248 | 1.313283931 | 0.231654683  | 0.00276987 | 0.010093122 |
| Ubl7      | 22 | 1.759945545 | 1.210960216 | -0.548985329 | 0.00277725 | 0.010117529 |
| Ccdc166   | 28 | 8.080009394 | 7.193255198 | -0.886754196 | 0.00278373 | 0.0101386   |
| 30539J05R | 32 | 2.270417213 | 1.478287805 | -0.792129408 | 0.00278943 | 0.010156864 |
| Scn3b     | 5  | 9.421756922 | 13.47098516 | 4.049228233  | 0.0027926  | 0.010165852 |
| Cd3e      | 2  | 80.55555556 | 66.19670747 | -14.35884808 | 0.00279401 | 0.010168466 |
| Gtf2a1l   | 1  | 100         | 92.39130435 | -7.608695652 | 0.00279855 | 0.010182475 |
| Itpr1     | 31 | 2.331488736 | 2.72353806  | 0.392049324  | 0.00281029 | 0.010222657 |
| Rbm10     | 22 | 19.40995018 | 16.44153639 | -2.968413787 | 0.00281521 | 0.01023803  |
| Ubox5     | 3  | 16.86646155 | 11.24542125 | -5.621040305 | 0.00281959 | 0.010251387 |
| Lyzl4os   | 4  | 96.72131148 | 89.44529392 | -7.276017558 | 0.00285378 | 0.010373153 |
| Nkap      | 28 | 21.06753983 | 18.02010661 | -3.047433223 | 0.00287194 | 0.010436555 |
| Nucb1     | 19 | 3.227650459 | 2.049898427 | -1.177752032 | 0.00290777 | 0.010564138 |

|            |     |             |             |              |            |             |
|------------|-----|-------------|-------------|--------------|------------|-------------|
| Pptc7      | 44  | 1.235755656 | 0.873762567 | -0.361993089 | 0.00291732 | 0.010596209 |
| Zmym6      | 36  | 1.516672108 | 0.836162346 | -0.680509763 | 0.00292397 | 0.010617752 |
| Mapk15     | 2   | 93.40848932 | 84.30650132 | -9.101988    | 0.0029471  | 0.010699096 |
| Heph11     | 1   | 84.34343434 | 73.04964539 | -11.29378895 | 0.00295338 | 0.010719259 |
| Crybb1     | 4   | 86.04735883 | 77.23141498 | -8.815943851 | 0.00296726 | 0.010766694 |
| St3gal5    | 44  | 1.262850572 | 1.56214199  | 0.299291417  | 0.00297319 | 0.010785798 |
| B4galt5    | 106 | 1.625749905 | 1.177822682 | -0.447927223 | 0.002975   | 0.010789719 |
| Arhgef9    | 7   | 19.09054604 | 15.12667378 | -3.963872261 | 0.00297909 | 0.010801859 |
| Ccdc116    | 54  | 46.54791078 | 44.9321781  | -1.615732678 | 0.002982   | 0.010807071 |
| Zfp768     | 78  | 2.024362711 | 1.57181982  | -0.452542891 | 0.00298179 | 0.010807071 |
| Slc25a31   | 45  | 92.64453017 | 90.91496171 | -1.729568461 | 0.00298337 | 0.010809382 |
| Igsf5      | 8   | 40.27149533 | 35.37794843 | -4.893546902 | 0.00300759 | 0.010894425 |
| Fosb       | 41  | 1.876193703 | 1.417973471 | -0.458220232 | 0.00301093 | 0.010903842 |
| Platr20    | 4   | 89.72990191 | 84.33164007 | -5.398261841 | 0.00302609 | 0.010956049 |
| Mir711     | 12  | 84.31498152 | 80.54893148 | -3.766050042 | 0.00304324 | 0.011015411 |
| Tbc1d1     | 139 | 2.970239206 | 2.237773443 | -0.732465763 | 0.00305228 | 0.011045419 |
| Bnc2       | 140 | 46.35405127 | 45.60984373 | -0.74420754  | 0.00305565 | 0.011054876 |
| Mir129b    | 4   | 8.06704576  | 3.959979514 | -4.107066245 | 0.00307611 | 0.011126156 |
| Prr15l     | 3   | 41.26194607 | 33.10266585 | -8.159280223 | 0.00309259 | 0.011183021 |
| Actbl2     | 2   | 92.76039403 | 84.63276836 | -8.12762567  | 0.00309749 | 0.011195749 |
| Serping1   | 4   | 65.55389647 | 59.75101765 | -5.802878824 | 0.00309764 | 0.011195749 |
| Jam2       | 15  | 2.683990454 | 3.79699699  | 1.113006535  | 0.00309865 | 0.011196653 |
| Cep112     | 39  | 2.048303111 | 1.490697032 | -0.557606078 | 0.00310004 | 0.011198918 |
| i30026P05F | 2   | 32.18390805 | 20.52023121 | -11.66367683 | 0.00312114 | 0.011272367 |
| Prkar1a    | 90  | 1.655250552 | 1.103592797 | -0.551657754 | 0.00312339 | 0.011277729 |
| Psen2      | 51  | 8.78238161  | 7.493923606 | -1.288458004 | 0.00312594 | 0.011284155 |
| Pdgfc      | 37  | 1.856821117 | 1.110546844 | -0.746274272 | 0.00313569 | 0.011316546 |
| BC023829   | 5   | 26.7585353  | 18.9053552  | -7.853180102 | 0.00313822 | 0.011322914 |
| Dip2c      | 69  | 1.496962873 | 1.083157108 | -0.413805765 | 0.00313931 | 0.011324064 |
| Sln        | 1   | 67.85714286 | 40.35087719 | -27.50626566 | 0.00314456 | 0.011340191 |
| Aifm3      | 36  | 1.497770286 | 2.730752542 | 1.232982256  | 0.00315342 | 0.01136934  |
| Atp6v1e2   | 3   | 88.26463886 | 80.13994423 | -8.124694629 | 0.00316227 | 0.011396164 |
| Sec14l1    | 93  | 1.837633424 | 1.326651168 | -0.510982255 | 0.00316241 | 0.011396164 |
| Ntf5       | 27  | 4.5691798   | 5.83438696  | 1.26520716   | 0.00318711 | 0.011482363 |



|            |     |             |             |              |            |             |
|------------|-----|-------------|-------------|--------------|------------|-------------|
| Mir6931    | 3   | 97.43589744 | 91.71356758 | -5.72232986  | 0.00319192 | 0.011496863 |
| Mir6925    | 4   | 95.44174954 | 91.10055942 | -4.341190124 | 0.00319717 | 0.011512944 |
| Mir5108    | 1   | 83.78378378 | 64          | -19.78378378 | 0.00319951 | 0.011518536 |
| Ddx21      | 19  | 2.075881781 | 1.180885999 | -0.894995782 | 0.0032104  | 0.011554906 |
| Fam162b    | 5   | 45.38705739 | 36.46423418 | -8.922823209 | 0.00321452 | 0.011566907 |
| Ptprn      | 14  | 4.425692877 | 2.926267989 | -1.499424888 | 0.00321958 | 0.011582296 |
| Nip7       | 50  | 1.939051303 | 1.405519843 | -0.533531461 | 0.00322057 | 0.011582998 |
| Sox21      | 75  | 20.74634566 | 21.84455574 | 1.098210081  | 0.00323706 | 0.011639468 |
| Gnaq       | 158 | 1.112713939 | 1.163071872 | 0.050357934  | 0.00323931 | 0.011644694 |
| Slc23a1    | 3   | 73.15078213 | 85.7990479  | 12.64826577  | 0.00324021 | 0.011645072 |
| Trip4      | 22  | 1.661897707 | 1.224607531 | -0.437290176 | 0.00325372 | 0.011690761 |
| Unkl       | 92  | 1.846889908 | 1.469918724 | -0.376971183 | 0.00325692 | 0.011699407 |
| Rnf152     | 52  | 1.730982342 | 1.362250569 | -0.368731773 | 0.00326297 | 0.011718254 |
| Mastl      | 33  | 1.585160074 | 1.147118789 | -0.438041286 | 0.00326621 | 0.011727031 |
| Impdh1     | 93  | 2.692621158 | 2.19516903  | -0.497452128 | 0.00327048 | 0.011739471 |
| Rpf2       | 23  | 1.654468526 | 1.197711707 | -0.456756819 | 0.00328096 | 0.011774222 |
| Slc7a7     | 12  | 59.92814323 | 56.84479422 | -3.083349016 | 0.00329232 | 0.011812106 |
| Rab3il1    | 37  | 3.118538389 | 2.479061325 | -0.639477064 | 0.00330613 | 0.011857557 |
| Rbm11      | 7   | 4.261227879 | 2.840323222 | -1.420904656 | 0.00330661 | 0.011857557 |
| Zfp148     | 42  | 1.826777348 | 1.302548503 | -0.524228845 | 0.00331102 | 0.011870471 |
| Pbp2       | 20  | 97.44829939 | 95.64156919 | -1.806730192 | 0.0033332  | 0.011947094 |
| Atp6v1g1   | 29  | 2.047032049 | 1.617953256 | -0.429078792 | 0.00334449 | 0.011984616 |
| Ecscr      | 3   | 8.035714286 | 3.06122449  | -4.974489796 | 0.00336015 | 0.012037799 |
| Ctf1       | 6   | 27.97438984 | 22.48043166 | -5.493958187 | 0.00336672 | 0.012058411 |
| Cxcl16     | 8   | 2.956002734 | 2.279509058 | -0.676493676 | 0.00338096 | 0.012106443 |
| Ddx4       | 50  | 95.37002847 | 93.85987376 | -1.51015471  | 0.00338182 | 0.012106554 |
| Eif1b      | 109 | 2.115334284 | 1.535465671 | -0.579868613 | 0.0033902  | 0.012133625 |
| 510009L18F | 75  | 1.034471894 | 1.278944023 | 0.244472129  | 0.00339165 | 0.012135854 |
| Ppp1cc     | 24  | 0.873828512 | 1.485775787 | 0.611947275  | 0.00339454 | 0.012143223 |
| Ihh        | 77  | 6.406933621 | 6.379300344 | -0.027633277 | 0.00339812 | 0.012153058 |
| Cxadr      | 46  | 2.020973299 | 1.393179023 | -0.627794276 | 0.00340931 | 0.012190122 |
| 700010I14R | 3   | 24.26668308 | 16.29790854 | -7.968774539 | 0.00345064 | 0.012333987 |
| Dusp5      | 106 | 0.991505969 | 1.259520282 | 0.268014312  | 0.00345123 | 0.012333987 |
| Hltf       | 20  | 1.81218293  | 0.805434202 | -1.006748728 | 0.00345331 | 0.012338424 |

|            |     |             |             |              |            |             |
|------------|-----|-------------|-------------|--------------|------------|-------------|
| Hoxc5      | 29  | 35.85861723 | 38.45493591 | 2.596318682  | 0.00346152 | 0.012364729 |
| Cpxm1      | 24  | 35.71777912 | 33.5277119  | -2.190067217 | 0.00349382 | 0.012477068 |
| Cdx2       | 31  | 47.81182345 | 51.00838903 | 3.196565582  | 0.00351077 | 0.012534561 |
| Sox11      | 101 | 28.64732689 | 29.97085592 | 1.323529028  | 0.00351375 | 0.012542142 |
| Kcnj14     | 2   | 85.90686275 | 77.56924321 | -8.337619535 | 0.00351682 | 0.012550054 |
| Wif1       | 30  | 3.27501371  | 2.208792176 | -1.066221534 | 0.00355423 | 0.012680452 |
| Vat1l      | 13  | 36.70312759 | 34.22299196 | -2.480135625 | 0.00360784 | 0.012868594 |
| Dnaja3     | 37  | 2.03755566  | 1.302514226 | -0.735041434 | 0.00362116 | 0.012912994 |
| Car7       | 56  | 8.763789523 | 10.29561964 | 1.531830117  | 0.00362789 | 0.012933831 |
| Ext2       | 38  | 2.077527079 | 1.338152954 | -0.739374125 | 0.00363466 | 0.012952244 |
| Slc41a2    | 48  | 2.258262357 | 1.464295492 | -0.793966866 | 0.00363482 | 0.012952244 |
| 30078K24F  | 1   | 58.75       | 43.93305439 | -14.81694561 | 0.00364977 | 0.013002368 |
| Csn3       | 1   | 24.08376963 | 12.63157895 | -11.45219069 | 0.00365179 | 0.013006398 |
| Thumpd3    | 10  | 1.614035854 | 1.114147329 | -0.499888525 | 0.0036592  | 0.013029635 |
| Dnm3       | 21  | 4.31995013  | 5.67268592  | 1.35273579   | 0.00366924 | 0.01306222  |
| Cdk1       | 30  | 2.306863373 | 1.763045101 | -0.543818272 | 0.00368553 | 0.013117026 |
| Klb        | 8   | 53.10335453 | 58.57374569 | 5.470391159  | 0.00368671 | 0.013118023 |
| Gabra4     | 8   | 41.825276   | 36.88683863 | -4.938437375 | 0.00369932 | 0.013159731 |
| Chrdl2     | 22  | 7.267344947 | 5.464825731 | -1.802519216 | 0.00371256 | 0.013203617 |
| Wwc2       | 97  | 1.84701221  | 1.386838508 | -0.460173701 | 0.00371796 | 0.01321963  |
| '00121N20F | 4   | 86.71278934 | 80.27305257 | -6.439736772 | 0.0037218  | 0.013230074 |
| Rap1gap2   | 65  | 19.70838016 | 21.93084284 | 2.222462684  | 0.00374003 | 0.013291644 |
| Grik4      | 69  | 4.105247791 | 5.722193083 | 1.616945292  | 0.00374746 | 0.013314822 |
| Lrrc31     | 1   | 68.1372549  | 53.80434783 | -14.33290708 | 0.00375646 | 0.013343582 |
| Krtap5-4   | 3   | 89.14876578 | 92.98844949 | 3.839683708  | 0.00375908 | 0.013349634 |
| Gm38671    | 1   | 31.53846154 | 17.98245614 | -13.5560054  | 0.00376144 | 0.013354785 |
| Cebpd      | 83  | 1.774562522 | 1.203395685 | -0.571166837 | 0.00377092 | 0.01338522  |
| Eci1       | 46  | 4.922396233 | 4.220079389 | -0.702316844 | 0.00378773 | 0.013441646 |
| BC100451   | 5   | 91.06660262 | 87.60474325 | -3.461859373 | 0.00379295 | 0.013456886 |
| Zfp703     | 78  | 1.799588335 | 1.287086447 | -0.512501888 | 0.0038037  | 0.013491769 |
| Hist2h2aa2 | 11  | 2.456051978 | 1.78603253  | -0.670019448 | 0.00380897 | 0.013507222 |
| Ubl4a      | 47  | 18.28254921 | 16.83817906 | -1.444370149 | 0.00385063 | 0.013651631 |
| Etnk2      | 48  | 2.797175502 | 2.163149506 | -0.634025996 | 0.00386427 | 0.0136967   |
| Mfi2       | 6   | 16.07920101 | 20.6194478  | 4.540246788  | 0.00386602 | 0.013699581 |

|            |     |             |             |              |            |             |
|------------|-----|-------------|-------------|--------------|------------|-------------|
| Gm11651    | 1   | 48.96551724 | 32.43243243 | -16.53308481 | 0.00387303 | 0.013721104 |
| Taf1       | 9   | 17.08647396 | 14.26045791 | -2.826016055 | 0.00391914 | 0.013881131 |
| Mrpl42     | 17  | 12.95308243 | 10.95493156 | -1.998150872 | 0.00392751 | 0.013905879 |
| Gcat       | 15  | 0.870871192 | 1.799855375 | 0.928984183  | 0.00392803 | 0.013905879 |
| Diexf      | 46  | 1.461124829 | 0.870706411 | -0.590418418 | 0.00392934 | 0.013907157 |
| Pax6os1    | 5   | 47.48486138 | 54.75836807 | 7.273506692  | 0.00393856 | 0.013934148 |
| i10301B20F | 53  | 1.209671348 | 0.893101368 | -0.31656998  | 0.00393886 | 0.013934148 |
| '32490B19F | 1   | 15.59139785 | 27.63819095 | 12.04679311  | 0.00395599 | 0.013989424 |
| Dkkl1      | 5   | 52.94531104 | 47.08375615 | -5.861554883 | 0.00395639 | 0.013989424 |
| Dhx29      | 44  | 1.26937987  | 1.755783721 | 0.486403851  | 0.00398257 | 0.014078604 |
| Rbfa       | 31  | 7.572553899 | 6.82149837  | -0.751055529 | 0.00398911 | 0.014098298 |
| Msi2       | 36  | 2.460325471 | 1.702883823 | -0.757441649 | 0.00399924 | 0.01413073  |
| Dock2      | 5   | 59.49070263 | 65.68982213 | 6.199119501  | 0.00400775 | 0.014157375 |
| Mttp       | 15  | 0.790043452 | 1.597265526 | 0.807222074  | 0.00404633 | 0.014290218 |
| Foxa1      | 67  | 1.415645892 | 1.158127743 | -0.257518148 | 0.00405302 | 0.014310403 |
| Al317395   | 21  | 9.965704217 | 9.677403992 | -0.288300225 | 0.00406481 | 0.014348562 |
| Tmem132e   | 53  | 47.57493806 | 46.2548901  | -1.320047962 | 0.00408488 | 0.014415965 |
| Rilp       | 15  | 10.60393033 | 9.224971782 | -1.378958553 | 0.00410039 | 0.014467218 |
| Plcx1      | 2   | 52.32990896 | 44.16216216 | -8.167746795 | 0.00411593 | 0.014518538 |
| Gltpd2     | 5   | 91.40734543 | 86.85051456 | -4.55683087  | 0.00413077 | 0.014567402 |
| Aldoa      | 60  | 3.198872165 | 2.399227606 | -0.799644559 | 0.0041368  | 0.014583303 |
| Mir7660    | 8   | 28.5356767  | 27.13945399 | -1.396222706 | 0.00413727 | 0.014583303 |
| Tpra1      | 39  | 0.802183199 | 1.095242212 | 0.293059013  | 0.00416722 | 0.014685363 |
| Pcsk6      | 104 | 1.478204664 | 1.018212163 | -0.459992501 | 0.00417938 | 0.014724649 |
| Timm8a1    | 39  | 19.49016496 | 17.48013537 | -2.010029593 | 0.00418705 | 0.014748136 |
| Pde1b      | 29  | 9.183809809 | 12.9004193  | 3.716609488  | 0.00420411 | 0.014804676 |
| Ralgds     | 148 | 2.926728024 | 2.657306588 | -0.269421437 | 0.00420713 | 0.014811771 |
| Pax7       | 26  | 19.01453463 | 18.4824295  | -0.532105137 | 0.00423001 | 0.014888726 |
| Magea2     | 6   | 75.28618372 | 69.05166606 | -6.234517666 | 0.00423987 | 0.014919878 |
| L3mbtl1    | 12  | 4.801046644 | 3.792666281 | -1.008380363 | 0.00424112 | 0.014920694 |
| Lad1       | 49  | 3.000975102 | 1.885054602 | -1.1159205   | 0.00424313 | 0.014924172 |
| Atp5sl     | 6   | 2.779309922 | 1.303744957 | -1.475564965 | 0.00428042 | 0.015051723 |
| Mir686     | 3   | 1.824817518 | 2.872062663 | 1.047245145  | 0.0042963  | 0.01510394  |
| Sin3b      | 22  | 1.636787931 | 0.886239598 | -0.750548334 | 0.00430193 | 0.015120139 |

|            |     |             |             |              |            |             |
|------------|-----|-------------|-------------|--------------|------------|-------------|
| Snhg11     | 5   | 19.96464739 | 17.38244328 | -2.582204103 | 0.00430716 | 0.015134887 |
| Fasl       | 1   | 83.74384236 | 92.62672811 | 8.882885746  | 0.00430864 | 0.015136447 |
| Miip       | 19  | 2.046507371 | 2.60163174  | 0.555124369  | 0.00431037 | 0.015138908 |
| Brd8       | 3   | 0           | 1.320261438 | 1.320261438  | 0.00431761 | 0.015159211 |
| Rab36      | 11  | 5.266762144 | 2.648061725 | -2.618700419 | 0.00431822 | 0.015159211 |
| Mir292b    | 3   | 89.19154229 | 83.10049969 | -6.091042594 | 0.00432787 | 0.015182197 |
| Abca3      | 68  | 1.781819571 | 1.256169262 | -0.52565031  | 0.00432759 | 0.015182197 |
| Mir291b    | 3   | 89.19154229 | 83.10049969 | -6.091042594 | 0.00432787 | 0.015182197 |
| Cdca3      | 16  | 3.511146648 | 2.197031378 | -1.31411527  | 0.00432892 | 0.015182261 |
| Rrnad1     | 9   | 0.911301885 | 2.444140904 | 1.532839019  | 0.0043401  | 0.015217829 |
| 332443119R | 3   | 68.28028457 | 62.46176827 | -5.818516298 | 0.00434243 | 0.015222378 |
| Tmem178b   | 5   | 61.58962922 | 56.58628313 | -5.003346089 | 0.00434421 | 0.015224951 |
| Zfp958     | 9   | 2.478013531 | 0.895036143 | -1.582977388 | 0.0043456  | 0.015226186 |
| Wnt3       | 60  | 15.53117633 | 17.5078004  | 1.976624064  | 0.00437183 | 0.015314435 |
| Tatdn1     | 12  | 2.040813689 | 1.51067163  | -0.530142059 | 0.00437622 | 0.01532618  |
| Pltp       | 7   | 6.750164333 | 2.527780312 | -4.222384021 | 0.00439071 | 0.015373247 |
| Arl5a      | 30  | 1.596888525 | 0.868719844 | -0.72816868  | 0.00439999 | 0.015402077 |
| Ogfod1     | 14  | 2.411191566 | 1.470401007 | -0.940790559 | 0.00442063 | 0.015470626 |
| Crim1      | 71  | 1.207413782 | 1.424078277 | 0.216664496  | 0.00442603 | 0.015485817 |
| Trim44     | 136 | 1.92733592  | 2.434983339 | 0.507647419  | 0.00443437 | 0.015511327 |
| Pdlim2     | 17  | 7.264037065 | 6.668493454 | -0.595543611 | 0.00445128 | 0.015566756 |
| Gpbar1     | 12  | 72.19729344 | 67.5043366  | -4.692956839 | 0.00445754 | 0.015584921 |
| Islr       | 7   | 78.84280296 | 72.98911688 | -5.853686073 | 0.00447384 | 0.015638199 |
| Brwd3      | 4   | 25.97370706 | 17.0262571  | -8.947449961 | 0.00450172 | 0.015731896 |
| Tmem44     | 14  | 1.463513658 | 0.514636853 | -0.948876805 | 0.004507   | 0.015746609 |
| Tlx1       | 45  | 17.34944814 | 18.13252272 | 0.783074573  | 0.00452527 | 0.015806653 |
| Ocr1       | 7   | 10.60493741 | 8.135641456 | -2.469295952 | 0.00452718 | 0.015809583 |
| Creb3l1    | 31  | 5.623317784 | 7.326041661 | 1.702723878  | 0.00455168 | 0.015891369 |
| Map2       | 20  | 3.706847623 | 2.678984804 | -1.027862819 | 0.00455376 | 0.015894815 |
| Gjc1       | 149 | 1.570276024 | 1.346708051 | -0.223567973 | 0.00456526 | 0.015931191 |
| Zmiz1      | 84  | 1.863334464 | 1.267839478 | -0.595494986 | 0.00457278 | 0.01595362  |
| Vim        | 24  | 1.55091838  | 0.771909531 | -0.779008848 | 0.00458922 | 0.01600719  |
| Tcp11      | 30  | 8.146302222 | 7.579561715 | -0.566740507 | 0.00459151 | 0.016011375 |
| Trim66     | 5   | 50.89066464 | 45.89615602 | -4.994508618 | 0.00460865 | 0.016067299 |

|            |     |             |             |              |            |             |
|------------|-----|-------------|-------------|--------------|------------|-------------|
| Ptdss2     | 48  | 2.36552688  | 1.843758822 | -0.521768058 | 0.00462374 | 0.016116085 |
| Shcbp1l    | 24  | 54.642938   | 57.60074005 | 2.95780205   | 0.0046358  | 0.01615428  |
| Arhgap31   | 30  | 2.172463669 | 1.485633354 | -0.686830315 | 0.00465292 | 0.016210089 |
| Mt1        | 21  | 2.937009468 | 2.099638104 | -0.837371365 | 0.00466352 | 0.016243191 |
| Il10rb     | 23  | 2.057014898 | 1.19091052  | -0.866104377 | 0.00468865 | 0.016326843 |
| Rhoj       | 16  | 11.6352621  | 16.74326147 | 5.107999368  | 0.0047039  | 0.016376053 |
| App        | 50  | 1.389951845 | 1.013272145 | -0.3766797   | 0.00470623 | 0.016380286 |
| 32454L22F  | 4   | 51.81835534 | 43.15807351 | -8.660281821 | 0.00471311 | 0.016396432 |
| Foxred2    | 37  | 3.340696667 | 5.123136108 | 1.782439441  | 0.00471239 | 0.016396432 |
| Peli2      | 81  | 1.126344862 | 0.891807702 | -0.23453716  | 0.00471552 | 0.016400925 |
| Kcne3      | 11  | 10.39001117 | 15.68634196 | 5.296330783  | 0.00472012 | 0.016413056 |
| Tesc       | 46  | 12.81925527 | 14.3783962  | 1.559140929  | 0.00472654 | 0.016431481 |
| Klf6       | 23  | 2.603919292 | 1.303151128 | -1.300768163 | 0.00473052 | 0.016441429 |
| Neurog3    | 11  | 11.38275337 | 15.06114439 | 3.678391017  | 0.00474375 | 0.016483495 |
| Sh3rf2     | 11  | 62.0753641  | 64.8635723  | 2.788208201  | 0.00474516 | 0.016484498 |
| Bod1l      | 55  | 0.83151206  | 1.564479948 | 0.732967888  | 0.00474774 | 0.016489541 |
| Tle4       | 170 | 1.496899879 | 1.085865213 | -0.411034666 | 0.00475598 | 0.016514243 |
| Atp10d     | 10  | 1.794289515 | 0.550408233 | -1.243881281 | 0.00480139 | 0.016667997 |
| Ccdc109b   | 9   | 2.021266429 | 1.271279185 | -0.749987244 | 0.00480766 | 0.016685813 |
| Mir6999    | 12  | 94.19388337 | 91.61422245 | -2.579660924 | 0.00481658 | 0.016712813 |
| '00049G17F | 12  | 4.297941845 | 3.005610611 | -1.292331234 | 0.00483161 | 0.016760991 |
| Mroh6      | 4   | 90.60992496 | 95.82876154 | 5.218836578  | 0.00484264 | 0.016795307 |
| Ephx4      | 42  | 8.80051232  | 11.16514547 | 2.364633147  | 0.00484864 | 0.016812136 |
| '00094J05R | 6   | 94.71918392 | 91.67274077 | -3.046443148 | 0.00486065 | 0.016849779 |
| Zbtb34     | 61  | 1.673848807 | 1.403318207 | -0.2705306   | 0.00486428 | 0.016858396 |
| Ccdc181    | 16  | 1.602853182 | 0.733004534 | -0.869848648 | 0.00486808 | 0.016867576 |
| Add2       | 3   | 26.26882868 | 34.3995075  | 8.130678813  | 0.0048735  | 0.016882384 |
| Cachd1     | 78  | 1.579945219 | 1.296896643 | -0.283048577 | 0.00487932 | 0.01689855  |
| Uck2       | 93  | 1.129256193 | 1.339950008 | 0.210693816  | 0.00489636 | 0.016953543 |
| Lmtk3      | 31  | 2.539179563 | 1.972920293 | -0.566259271 | 0.0049133  | 0.017008209 |
| Iah1       | 24  | 1.144302998 | 1.626234978 | 0.48193198   | 0.00492001 | 0.017027416 |
| Rpl10a     | 78  | 2.117551403 | 1.745684963 | -0.371866439 | 0.00492379 | 0.017032445 |
| BC016579   | 10  | 8.067037879 | 11.78128948 | 3.714251599  | 0.0049237  | 0.017032445 |
| Ccdc96     | 92  | 2.333742558 | 1.726908893 | -0.606833665 | 0.00493161 | 0.01705548  |

|            |     |             |             |              |            |             |
|------------|-----|-------------|-------------|--------------|------------|-------------|
| Rap1gds1   | 132 | 1.07501263  | 1.149710798 | 0.074698168  | 0.00493776 | 0.017072729 |
| Dus2       | 29  | 1.208010541 | 0.548065682 | -0.659944858 | 0.0049423  | 0.017084412 |
| Usp13      | 66  | 39.59658737 | 41.02948714 | 1.432899767  | 0.00495717 | 0.017126123 |
| Xrcc6bp1   | 29  | 0.90162533  | 1.414365803 | 0.512740473  | 0.00495623 | 0.017126123 |
| Apoc2      | 6   | 40.64651561 | 35.20560454 | -5.440911075 | 0.00495787 | 0.017126123 |
| Kat6b      | 85  | 2.735628046 | 1.950573389 | -0.785054657 | 0.00496569 | 0.017149114 |
| Arhgap27   | 11  | 14.16330769 | 12.30344582 | -1.859861867 | 0.00496859 | 0.017153375 |
| Mir7b      | 12  | 3.648310969 | 1.814477831 | -1.833833137 | 0.00496927 | 0.017153375 |
| Snrnp200   | 21  | 1.349334104 | 0.805772284 | -0.54356182  | 0.00497763 | 0.017178205 |
| Pigh       | 14  | 0.629873648 | 2.43636304  | 1.806489392  | 0.00499614 | 0.017238029 |
| Emc3       | 9   | 2.539078007 | 0.851567977 | -1.687510031 | 0.00502027 | 0.01731721  |
| Upk1b      | 3   | 32.62311762 | 25.93627339 | -6.686844235 | 0.00507391 | 0.017498144 |
| '00052K11F | 73  | 1.384272076 | 1.052618221 | -0.331653854 | 0.00507683 | 0.017504079 |
| Nos3       | 15  | 83.36182865 | 84.52874181 | 1.166913155  | 0.00508128 | 0.017515315 |
| 510009E07F | 57  | 4.435763055 | 4.244306511 | -0.191456543 | 0.00509009 | 0.017541552 |
| Wnt7a      | 28  | 2.403582493 | 1.792195844 | -0.611386649 | 0.0051043  | 0.01758642  |
| Frk        | 2   | 14.72277722 | 9.261790841 | -5.460986382 | 0.00510935 | 0.017599657 |
| Olf750     | 3   | 77.63402216 | 69.90551996 | -7.728502199 | 0.00511444 | 0.01761306  |
| Tpmt       | 14  | 3.294196921 | 1.487582787 | -1.806614134 | 0.00511868 | 0.017623528 |
| Golph3     | 68  | 0.784679579 | 1.225950828 | 0.441271249  | 0.00512642 | 0.017646043 |
| Pnmal2     | 22  | 27.64584776 | 25.05349704 | -2.592350721 | 0.00513891 | 0.017684889 |
| Mybpc2     | 1   | 58.66666667 | 34.92063492 | -23.74603175 | 0.00515527 | 0.017737031 |
| Mrps6      | 53  | 1.821306194 | 1.238385925 | -0.582920269 | 0.00519714 | 0.017876908 |
| Sppl2a     | 3   | 4.337218212 | 1.573254671 | -2.763963541 | 0.00520807 | 0.017910286 |
| Purg       | 86  | 3.243522828 | 2.543417712 | -0.700105115 | 0.00521779 | 0.017939512 |
| Mapk9      | 58  | 1.758635314 | 1.189944031 | -0.568691283 | 0.00522625 | 0.017960188 |
| Nipal3     | 15  | 2.926965363 | 1.447520961 | -1.479444403 | 0.00522591 | 0.017960188 |
| Rhpn2      | 5   | 3.323449825 | 3.965597937 | 0.642148112  | 0.0052331  | 0.017979508 |
| 700001L05F | 9   | 16.08206894 | 20.56801799 | 4.48594905   | 0.0052526  | 0.018042278 |
| Rrs1       | 35  | 25.29171052 | 24.40513157 | -0.886578947 | 0.00527513 | 0.018115441 |
| Naprt      | 8   | 11.62406791 | 10.36073059 | -1.263337315 | 0.00529501 | 0.018179436 |
| Dhx58      | 3   | 95.16749241 | 88.96884803 | -6.198644374 | 0.00530765 | 0.018218598 |
| Dgkd       | 115 | 1.204090508 | 1.342595937 | 0.138505428  | 0.0053117  | 0.018228232 |
| Iqcc       | 17  | 1.541289615 | 0.860722507 | -0.680567108 | 0.0053137  | 0.018230818 |

|            |     |             |             |              |            |             |
|------------|-----|-------------|-------------|--------------|------------|-------------|
| Gm4262     | 3   | 19.88295747 | 11.95265168 | -7.93030578  | 0.00531809 | 0.018241608 |
| Emilin2    | 63  | 6.527125095 | 7.83455674  | 1.307431645  | 0.00535288 | 0.018356665 |
| Bclaf1     | 42  | 1.638480831 | 1.333273948 | -0.305206883 | 0.00535941 | 0.018374771 |
| Gnat2      | 6   | 86.68456405 | 81.25610175 | -5.428462298 | 0.0053633  | 0.018383803 |
| Nufip1     | 22  | 0.930932897 | 1.375985748 | 0.44505285   | 0.00539325 | 0.018482147 |
| Rnase13    | 4   | 95.06380686 | 89.65056734 | -5.413239516 | 0.00541425 | 0.018549774 |
| Myt1l      | 12  | 36.51635812 | 34.62032006 | -1.896038058 | 0.00543642 | 0.01862139  |
| Zkscan1    | 26  | 1.268845529 | 0.922225607 | -0.346619922 | 0.00543805 | 0.018622641 |
| Rnf220     | 29  | 18.64190645 | 20.58774726 | 1.945840806  | 0.00545109 | 0.018662928 |
| Arl6ip1    | 16  | 1.803925802 | 0.86157776  | -0.942348042 | 0.00546741 | 0.018714449 |
| Aldh7a1    | 95  | 4.660676195 | 5.772647347 | 1.111971152  | 0.00547549 | 0.018737711 |
| Rprd2      | 21  | 1.479698814 | 0.705695946 | -0.774002868 | 0.00549076 | 0.018785587 |
| Nfatc1     | 184 | 1.501143863 | 1.329573199 | -0.171570663 | 0.00549811 | 0.018806343 |
| Ndufa3     | 14  | 3.349582533 | 2.103464503 | -1.246118031 | 0.00550331 | 0.018819755 |
| Pdia5      | 69  | 1.793607512 | 1.692404329 | -0.101203183 | 0.00550478 | 0.018820383 |
| Actr1a     | 7   | 2.780068557 | 1.454225398 | -1.325843159 | 0.00551405 | 0.018847706 |
| Mir5046    | 48  | 93.9462957  | 94.54909814 | 0.602802442  | 0.005532   | 0.018895849 |
| Gm5424     | 22  | 6.718817959 | 8.241673014 | 1.522855055  | 0.00553089 | 0.018895849 |
| Sqrdl      | 13  | 1.534867709 | 2.41090035  | 0.876032641  | 0.00552994 | 0.018895849 |
| Tmsb15b1   | 4   | 37.53921482 | 47.69664955 | 10.15743473  | 0.00553737 | 0.018905393 |
| Tmsb15l    | 4   | 37.53921482 | 47.69664955 | 10.15743473  | 0.00553737 | 0.018905393 |
| Itfg2      | 11  | 1.770703421 | 1.014308709 | -0.756394711 | 0.00554118 | 0.018913997 |
| Cdc25a     | 36  | 1.42413515  | 0.907568324 | -0.516566826 | 0.0055569  | 0.018963261 |
| Vcl        | 65  | 1.435397967 | 0.89562029  | -0.539777677 | 0.00555942 | 0.01896745  |
| Cbln3      | 19  | 1.134403957 | 1.682954631 | 0.548550674  | 0.00558708 | 0.019057386 |
| Ube2d2b    | 7   | 98.54568977 | 96.3737954  | -2.171894365 | 0.00559729 | 0.019087746 |
| Large      | 101 | 1.423183951 | 1.25831569  | -0.164868261 | 0.00560902 | 0.019120729 |
| Tmc6       | 21  | 4.062503793 | 3.145963127 | -0.916540666 | 0.00560956 | 0.019120729 |
| S1pr2      | 14  | 3.644099502 | 2.591994223 | -1.05210528  | 0.0056139  | 0.019131053 |
| Chrd       | 85  | 2.741990078 | 2.234609854 | -0.507380224 | 0.00561899 | 0.019143981 |
| Tcte2      | 103 | 1.887925948 | 1.682046486 | -0.205879463 | 0.00562254 | 0.019151622 |
| Med23      | 40  | 1.686442643 | 1.167869605 | -0.518573038 | 0.00562669 | 0.019155247 |
| Pno1       | 23  | 2.866031824 | 2.498767541 | -0.367264282 | 0.00562752 | 0.019155247 |
| 730013B05F | 19  | 10.28400893 | 8.919105265 | -1.364903667 | 0.00562732 | 0.019155247 |

|            |     |             |             |              |            |             |
|------------|-----|-------------|-------------|--------------|------------|-------------|
| I30007P06F | 7   | 18.49830889 | 14.86565665 | -3.632652241 | 0.00565444 | 0.01924239  |
| Rundc3a    | 37  | 5.356964694 | 5.53175434  | 0.174789647  | 0.00567776 | 0.019314508 |
| Unc45b     | 2   | 77.61561562 | 84.29637891 | 6.680763293  | 0.00567826 | 0.019314508 |
| Npy        | 25  | 17.58174433 | 17.60550966 | 0.023765324  | 0.00568146 | 0.019320905 |
| Ppib       | 54  | 1.120916263 | 0.81880341  | -0.302112854 | 0.00570914 | 0.019410558 |
| Clns1a     | 61  | 7.837974467 | 7.06593752  | -0.772036947 | 0.00573496 | 0.019493801 |
| Sars       | 12  | 1.380615655 | 0.355792931 | -1.024822723 | 0.0057372  | 0.019496921 |
| H2afz      | 95  | 1.265256806 | 1.468355523 | 0.203098717  | 0.005765   | 0.019586859 |
| Erbp3      | 57  | 1.90556443  | 1.557289465 | -0.348274965 | 0.00577714 | 0.019623541 |
| Sctr       | 8   | 18.5205511  | 16.67867506 | -1.841876041 | 0.00578741 | 0.019653888 |
| Dcaf7      | 63  | 1.565141999 | 1.286067235 | -0.279074765 | 0.00579993 | 0.019691847 |
| Spag7      | 32  | 1.823779542 | 1.13443291  | -0.689346632 | 0.00580954 | 0.019719901 |
| Gramd3     | 13  | 2.672846965 | 1.736462925 | -0.93638404  | 0.00581572 | 0.019736323 |
| Ssmem1     | 4   | 91.36904762 | 82.02232606 | -9.346721555 | 0.00582778 | 0.019772683 |
| Scamp1     | 77  | 1.553318628 | 1.171955894 | -0.381362734 | 0.00583549 | 0.019794258 |
| Mob4       | 69  | 1.191928771 | 1.51988043  | 0.327951659  | 0.00585858 | 0.019868003 |
| Mfap3      | 19  | 2.033680007 | 1.373905813 | -0.659774194 | 0.00586926 | 0.019899617 |
| Paqr9      | 134 | 5.362162639 | 6.319929234 | 0.957766594  | 0.00591722 | 0.020057593 |
| I30407G08F | 4   | 67.83898305 | 61.56820631 | -6.270776746 | 0.00592553 | 0.020081103 |
| Ptpn23     | 62  | 1.396791056 | 1.029250939 | -0.367540116 | 0.00593805 | 0.020118881 |
| Ifnlr1     | 18  | 2.936435846 | 1.451654911 | -1.484780936 | 0.00594068 | 0.020122913 |
| Zfp867     | 10  | 2.12272933  | 1.075981801 | -1.046747529 | 0.00594198 | 0.020122913 |
| Vash1      | 35  | 1.956689724 | 1.224592245 | -0.732097479 | 0.00596107 | 0.020182923 |
| Ppp2ca     | 88  | 1.41679247  | 1.077695983 | -0.339096487 | 0.00596454 | 0.020189987 |
| Scn4b      | 24  | 5.993234878 | 5.003566994 | -0.989667884 | 0.00596977 | 0.020203048 |
| Myl1       | 2   | 85.91549296 | 74.3902439  | -11.52524906 | 0.00598578 | 0.020252543 |
| Ptar1      | 100 | 0.870389463 | 1.04254829  | 0.172158827  | 0.00603531 | 0.020415446 |
| Rnf182     | 38  | 9.849623713 | 9.673407108 | -0.176216605 | 0.00603928 | 0.020424156 |
| Tppp       | 39  | 2.163148973 | 1.201131969 | -0.962017004 | 0.00606949 | 0.020521606 |
| Fah        | 46  | 3.705325823 | 2.855265548 | -0.850060276 | 0.0061063  | 0.020641299 |
| G6b        | 5   | 23.07982349 | 30.26053041 | 7.180706916  | 0.00612616 | 0.02070365  |
| Fsip1      | 4   | 4.647045505 | 2.374223646 | -2.272821859 | 0.00619043 | 0.020913339 |
| Ttc17      | 53  | 1.287497112 | 1.7388012   | 0.451304088  | 0.00619106 | 0.020913339 |
| Pin1rt1    | 5   | 97.88375835 | 96.39092304 | -1.492835311 | 0.0062041  | 0.020952569 |



|            |    |             |             |              |            |             |
|------------|----|-------------|-------------|--------------|------------|-------------|
| Hmga1-rs1  | 55 | 1.677941963 | 1.482825654 | -0.195116309 | 0.00625341 | 0.021114249 |
| Slc25a17   | 7  | 0.66626089  | 2.184375579 | 1.518114688  | 0.00626887 | 0.021156718 |
| Dcc        | 13 | 45.98263974 | 50.52080196 | 4.53816222   | 0.00626787 | 0.021156718 |
| Trub1      | 9  | 3.079141507 | 1.732016636 | -1.347124872 | 0.00629281 | 0.021232639 |
| Zfp606     | 39 | 1.533238217 | 1.096790862 | -0.436447355 | 0.00633559 | 0.021372051 |
| Txn14a     | 27 | 2.076088389 | 1.067394858 | -1.008693531 | 0.0063508  | 0.021418447 |
| Flnc       | 37 | 4.173303671 | 2.90921843  | -1.264085241 | 0.00637816 | 0.021505765 |
| 333419F23F | 36 | 2.517131951 | 2.221163936 | -0.295968015 | 0.00638154 | 0.021507278 |
| Map3k8     | 36 | 2.517131951 | 2.221163936 | -0.295968015 | 0.00638154 | 0.021507278 |
| Wdr48      | 85 | 1.16997283  | 1.302395132 | 0.132422303  | 0.00639988 | 0.021564126 |
| Mirlet7e   | 13 | 85.35604991 | 82.22245121 | -3.133598695 | 0.00641887 | 0.02162315  |
| Fsbp       | 3  | 92.41715879 | 96.15050919 | 3.733350395  | 0.00642438 | 0.02163676  |
| Mir215     | 3  | 96.82125544 | 93.57227446 | -3.248980981 | 0.00643355 | 0.021662656 |
| Tmem106c   | 54 | 1.426976724 | 1.079061122 | -0.347915602 | 0.00650044 | 0.021882863 |
| Tie1       | 1  | 74.07407407 | 62.40310078 | -11.6709733  | 0.00652578 | 0.021963154 |
| Nprl2      | 14 | 1.874618507 | 2.485355206 | 0.610736698  | 0.00652935 | 0.021970129 |
| Enpep      | 1  | 51.78571429 | 28.16901408 | -23.6167002  | 0.00654973 | 0.022033625 |
| 11-Sep     | 80 | 1.112003032 | 1.345873957 | 0.233870926  | 0.00656927 | 0.022094324 |
| Xlr3c      | 4  | 71.93144499 | 66.37043447 | -5.561010518 | 0.00659472 | 0.022174818 |
| Fn3krp     | 11 | 2.531761016 | 1.837513197 | -0.694247819 | 0.00660493 | 0.02220406  |
| Ppm1f      | 5  | 4.473267433 | 2.746046866 | -1.727220567 | 0.00663634 | 0.022304562 |
| Zfp648     | 2  | 52.49982346 | 59.59949291 | 7.099669451  | 0.00665826 | 0.022373085 |
| Tnip2      | 31 | 0.974170273 | 1.660171985 | 0.686001712  | 0.0066627  | 0.022382901 |
| Flt4       | 26 | 2.104691458 | 1.208604022 | -0.896087436 | 0.00669662 | 0.02249168  |
| Hrsp12     | 12 | 1.942539079 | 0.795511663 | -1.147027416 | 0.00672574 | 0.022576306 |
| Mir7235    | 14 | 82.92965973 | 79.06914463 | -3.860515104 | 0.00672643 | 0.022576306 |
| C1qtnf2    | 15 | 11.20077845 | 11.81209723 | 0.611318786  | 0.0067256  | 0.022576306 |
| Mir7118    | 7  | 97.94983626 | 96.58238165 | -1.367454608 | 0.00674471 | 0.022632504 |
| Greb1      | 18 | 12.89621338 | 9.565506303 | -3.330707073 | 0.00675392 | 0.02265821  |
| Sptb       | 54 | 2.989090256 | 4.224632598 | 1.235542342  | 0.00675966 | 0.022672287 |
| Hoxd3      | 26 | 48.50166371 | 50.95673404 | 2.455070334  | 0.00676236 | 0.022676147 |
| Csrnp2     | 64 | 1.775002311 | 1.419740332 | -0.355261979 | 0.00680811 | 0.02282434  |
| Galnt15    | 2  | 74.19738863 | 63.82264475 | -10.37474388 | 0.00681916 | 0.022856172 |
| Mir365-1   | 1  | 98.97260274 | 95.37366548 | -3.598937259 | 0.00682303 | 0.022863939 |

|           |     |             |             |              |            |             |
|-----------|-----|-------------|-------------|--------------|------------|-------------|
| Pak2      | 42  | 1.005445412 | 1.166291982 | 0.16084657   | 0.00685371 | 0.022961495 |
| Mms22l    | 66  | 1.349158719 | 1.007781044 | -0.341377675 | 0.00686362 | 0.02298945  |
| Shtn1     | 32  | 2.655086461 | 1.664274368 | -0.990812093 | 0.00687052 | 0.023007311 |
| Wnt1      | 32  | 6.899636635 | 8.354906956 | 1.455270321  | 0.00688449 | 0.023048835 |
| Prox1     | 52  | 40.95259904 | 40.36069502 | -0.591904017 | 0.00688824 | 0.023056136 |
| Mrpl9     | 22  | 2.866057904 | 2.056444862 | -0.809613042 | 0.00690242 | 0.023098318 |
| S1pr4     | 1   | 44.44444444 | 33.42036554 | -11.02407891 | 0.0069049  | 0.023101348 |
| Nfib      | 109 | 1.787231113 | 1.582368829 | -0.204862285 | 0.00692301 | 0.023156667 |
| Cdnf      | 27  | 2.980167393 | 1.949272277 | -1.030895116 | 0.00694146 | 0.023213067 |
| Ptchd3    | 19  | 65.06393779 | 61.86236924 | -3.201568557 | 0.00694526 | 0.023220477 |
| Hspa4l    | 51  | 1.558050225 | 1.001481878 | -0.556568347 | 0.00698536 | 0.023341222 |
| Thsd7b    | 33  | 50.27027044 | 52.83598816 | 2.565717719  | 0.0069869  | 0.023341222 |
| Al661453  | 33  | 1.93420288  | 1.466137766 | -0.468065114 | 0.00698773 | 0.023341222 |
| Fhad1os1  | 1   | 54.62962963 | 36.75213675 | -17.87749288 | 0.00698438 | 0.023341222 |
| Rspo1     | 66  | 13.71581497 | 14.11526755 | 0.399452576  | 0.00700333 | 0.023388007 |
| Psd       | 9   | 8.707502593 | 8.623250094 | -0.084252499 | 0.00700744 | 0.023396407 |
| Mir6950   | 2   | 28.54302066 | 19.3267674  | -9.216253257 | 0.00702831 | 0.023460737 |
| Cers4     | 6   | 20.06828849 | 28.01106283 | 7.942774341  | 0.00703322 | 0.023468559 |
| Nfil3     | 110 | 1.321059236 | 1.237003903 | -0.084055334 | 0.00703385 | 0.023468559 |
| Lcat      | 7   | 89.36503794 | 92.15546002 | 2.790422081  | 0.00705037 | 0.023518345 |
| Iffo2     | 83  | 2.164107959 | 1.38388355  | -0.780224409 | 0.00706731 | 0.023569462 |
| Coro6     | 9   | 91.92177617 | 88.33108861 | -3.590687557 | 0.00707171 | 0.023578794 |
| Irs1      | 45  | 2.23812724  | 1.634336724 | -0.603790516 | 0.00707903 | 0.023597823 |
| Mir1928   | 4   | 78.69520196 | 71.33048884 | -7.364713124 | 0.00711517 | 0.023712938 |
| Rab3ip    | 90  | 1.296006964 | 1.894188571 | 0.598181607  | 0.00715146 | 0.023828467 |
| 00026A02F | 2   | 92.43481325 | 84.94468085 | -7.490132398 | 0.00715327 | 0.023829092 |
| Grin2d    | 44  | 4.067350998 | 2.391913798 | -1.6754372   | 0.0071903  | 0.023947009 |
| Uchl1os   | 7   | 10.00207381 | 7.544093491 | -2.457980321 | 0.00720203 | 0.023980632 |
| Flad1     | 12  | 3.515263306 | 1.885069714 | -1.630193592 | 0.00721416 | 0.024015571 |
| 31428F04F | 16  | 10.44373495 | 10.40928392 | -0.034451033 | 0.00722092 | 0.024032595 |
| Prrc2c    | 33  | 1.523447867 | 0.745113161 | -0.778334706 | 0.00728022 | 0.024224464 |
| Aida      | 3   | 18.05205844 | 13.47021646 | -4.58184198  | 0.00728309 | 0.024228522 |
| Rbm27     | 28  | 1.066283082 | 1.762008909 | 0.695725827  | 0.00728965 | 0.024244869 |
| Elf4      | 10  | 22.67306664 | 19.08013059 | -3.592936057 | 0.00732006 | 0.024340487 |

|            |     |             |             |              |            |             |
|------------|-----|-------------|-------------|--------------|------------|-------------|
| Mill2      | 3   | 4.633157697 | 2.38730239  | -2.245855307 | 0.0073456  | 0.024417348 |
| Ywhaz      | 8   | 31.73173367 | 29.7803582  | -1.951375474 | 0.0073465  | 0.024417348 |
| Mtg1       | 44  | 1.801212655 | 1.112054864 | -0.689157792 | 0.00734908 | 0.024420393 |
| Rbms1      | 135 | 1.568968896 | 1.311287009 | -0.257681888 | 0.00737423 | 0.024498415 |
| Rasgrp1    | 16  | 14.50644587 | 17.56809665 | 3.06165078   | 0.00737715 | 0.02450255  |
| Rpl37rt    | 10  | 98.96454655 | 98.11474209 | -0.849804459 | 0.00739009 | 0.024539997 |
| Lrrc8c     | 95  | 0.975299119 | 1.187136071 | 0.211836951  | 0.00739329 | 0.02454506  |
| 15Erttd621 | 64  | 0.834107293 | 1.095395809 | 0.261288516  | 0.0074015  | 0.024566766 |
| Gm10190    | 94  | 45.29330393 | 45.20870514 | -0.084598792 | 0.00741046 | 0.024590944 |
| Catsperg1  | 7   | 89.95726321 | 92.30295912 | 2.345695913  | 0.00744445 | 0.024698129 |
| Krt19      | 8   | 6.14799365  | 3.510635506 | -2.637358144 | 0.00744779 | 0.024703629 |
| Vpreb3     | 2   | 74.92979243 | 64.82518323 | -10.1046092  | 0.0074987  | 0.024866864 |
| Cldn34c1   | 20  | 73.91427122 | 69.48865737 | -4.42561385  | 0.00750589 | 0.024885094 |
| Palld      | 37  | 5.942448046 | 5.229848663 | -0.712599384 | 0.00755216 | 0.025032859 |
| Efna5      | 126 | 1.605657776 | 1.214882367 | -0.390775409 | 0.00756719 | 0.025077013 |
| Ybx2       | 112 | 5.293424318 | 5.108329053 | -0.185095264 | 0.00757774 | 0.025106282 |
| Rpl3l      | 4   | 77.96153479 | 84.60518597 | 6.643651183  | 0.00758076 | 0.025110611 |
| Plekho2    | 48  | 2.359702493 | 1.806009775 | -0.553692718 | 0.00763377 | 0.025280512 |
| 110099E03F | 1   | 89.13043478 | 78.125      | -11.00543478 | 0.00764347 | 0.025306937 |
| Acsl1      | 78  | 1.47606207  | 1.202348871 | -0.273713199 | 0.00769669 | 0.025477388 |
| Fendrr     | 86  | 5.606238952 | 7.139103164 | 1.532864211  | 0.00774436 | 0.025629398 |
| Ccser2     | 86  | 1.053451176 | 1.355280627 | 0.301829451  | 0.00774762 | 0.025634409 |
| N6amt2     | 14  | 2.684372975 | 1.97180025  | -0.712572724 | 0.00775345 | 0.025647894 |
| 30323A14F  | 12  | 19.37942867 | 22.51798341 | 3.138554741  | 0.00775663 | 0.025652659 |
| Vangl1     | 79  | 1.413425063 | 1.18873518  | -0.224689883 | 0.00776958 | 0.02568968  |
| Rbpms2     | 79  | 5.659231198 | 5.48153469  | -0.177696508 | 0.00777654 | 0.025706917 |
| Rac2       | 2   | 66.29437284 | 54.33054879 | -11.96382405 | 0.00779492 | 0.025761847 |
| Saysd1     | 35  | 1.994360179 | 1.583964505 | -0.410395674 | 0.00783875 | 0.025895041 |
| Card14     | 9   | 59.1011823  | 52.48690802 | -6.614274288 | 0.00783786 | 0.025895041 |
| 30503F20F  | 2   | 62.84109149 | 49.74378048 | -13.09731102 | 0.00787569 | 0.02600746  |
| Sdhaf1     | 70  | 1.560552506 | 1.346368359 | -0.214184146 | 0.00787632 | 0.02600746  |
| Mir3081    | 60  | 27.71811836 | 28.07643349 | 0.358315129  | 0.00790644 | 0.02610103  |
| Uap1       | 121 | 1.839619475 | 1.422968609 | -0.416650866 | 0.00796567 | 0.026290646 |
| Gm6277     | 122 | 1.716975331 | 1.343703512 | -0.373271819 | 0.00797537 | 0.026316739 |

|            |     |             |             |              |            |             |
|------------|-----|-------------|-------------|--------------|------------|-------------|
| I30531B16F | 9   | 27.92868921 | 35.18517707 | 7.256487866  | 0.00798103 | 0.026329505 |
| Rqcd1      | 42  | 1.77806561  | 1.33400006  | -0.44406555  | 0.00798576 | 0.026339185 |
| Ppfia1     | 53  | 0.69686519  | 1.188512443 | 0.491647253  | 0.00798946 | 0.026345453 |
| Cyth1      | 44  | 1.393772471 | 1.863504082 | 0.469731611  | 0.00799877 | 0.026370257 |
| Wnt4       | 159 | 8.583752247 | 9.902221435 | 1.318469188  | 0.00801755 | 0.026426225 |
| Gpd1       | 1   | 16.04938272 | 4.62962963  | -11.41975309 | 0.00802796 | 0.026454596 |
| Dusp22     | 59  | 1.64120553  | 2.063731289 | 0.42252576   | 0.00803284 | 0.026464738 |
| Pat11      | 61  | 0.76917847  | 1.002223929 | 0.23304546   | 0.00803551 | 0.026467571 |
| Fbxo41     | 22  | 6.957314964 | 8.382192904 | 1.42487794   | 0.00804181 | 0.026482403 |
| Nphp3      | 64  | 1.901408938 | 1.29074748  | -0.610661458 | 0.00805501 | 0.02651989  |
| Cldn23     | 54  | 2.021430922 | 1.59406078  | -0.427370142 | 0.00810076 | 0.02666456  |
| Snapc1     | 28  | 2.112247091 | 1.166675178 | -0.945571913 | 0.00813635 | 0.026775686 |
| Ppp2r4     | 24  | 1.876975077 | 1.280148022 | -0.596827054 | 0.00814131 | 0.026782156 |
| Trabd      | 61  | 1.625040086 | 1.214444757 | -0.410595328 | 0.00814197 | 0.026782156 |
| Marveld1   | 42  | 0.526286797 | 0.845370921 | 0.319084124  | 0.00818092 | 0.02689823  |
| Ccdc88a    | 81  | 0.974238959 | 1.208985677 | 0.234746718  | 0.00818028 | 0.02689823  |
| Srsf5      | 30  | 2.060298243 | 1.503454647 | -0.556843596 | 0.00819414 | 0.026935665 |
| St6galnac5 | 13  | 23.7256717  | 20.35536237 | -3.370309336 | 0.00821621 | 0.02700217  |
| Plekhg5    | 44  | 1.596689776 | 2.237665072 | 0.640975296  | 0.0082365  | 0.027062799 |
| Zkscan5    | 12  | 1.922238026 | 2.812009836 | 0.889771811  | 0.00825657 | 0.027122656 |
| Dhx35      | 32  | 2.089994938 | 1.605025047 | -0.484969892 | 0.00830092 | 0.027262231 |
| I90002F15F | 13  | 1.454746448 | 1.071128009 | -0.383618438 | 0.00831482 | 0.027301792 |
| Pin1       | 28  | 1.661444692 | 1.900091927 | 0.238647235  | 0.00833805 | 0.027371934 |
| Slc25a20   | 16  | 1.796050977 | 0.916115861 | -0.879935116 | 0.00835107 | 0.027408556 |
| Gm15706    | 63  | 1.26314539  | 0.93569468  | -0.32745071  | 0.00836816 | 0.027458499 |
| Lcn6       | 1   | 53.84615385 | 71.42857143 | 17.58241758  | 0.00837159 | 0.027463597 |
| Slc5a7     | 17  | 37.49868761 | 37.13133527 | -0.367352346 | 0.00837869 | 0.02748076  |
| Fras1      | 32  | 5.014856057 | 4.32096967  | -0.693886387 | 0.00839928 | 0.027542145 |
| Snrnp70    | 22  | 1.302369059 | 1.051953202 | -0.250415857 | 0.00844413 | 0.027683002 |
| Pi4kb      | 52  | 1.242628304 | 1.325785439 | 0.083157135  | 0.00846381 | 0.027741341 |
| Pcbp2      | 78  | 1.556496456 | 1.372047353 | -0.184449103 | 0.00849517 | 0.027837899 |
| Hif3a      | 26  | 4.116084271 | 2.894773812 | -1.221310459 | 0.00853624 | 0.027966231 |
| Ube2e2     | 30  | 1.190232031 | 1.743235551 | 0.553003521  | 0.00858522 | 0.028120444 |
| Fmn1       | 14  | 9.336152284 | 7.82577342  | -1.510378864 | 0.00859304 | 0.028139774 |

|           |     |             |             |              |            |             |
|-----------|-----|-------------|-------------|--------------|------------|-------------|
| Enpp2     | 1   | 45.28301887 | 20.83333333 | -24.44968553 | 0.00859661 | 0.028145168 |
| Znfx1     | 51  | 0.973457568 | 1.226661778 | 0.25320421   | 0.00860314 | 0.028160257 |
| Apold1    | 4   | 93.33594371 | 88.37802795 | -4.957915757 | 0.00861576 | 0.028195293 |
| Lyp1a2    | 8   | 3.198244784 | 1.730796335 | -1.467448449 | 0.00863651 | 0.0282569   |
| Lrrcc1    | 13  | 3.048507437 | 2.46339375  | -0.585113687 | 0.00863914 | 0.028259206 |
| Sart3     | 90  | 1.079877498 | 1.283431519 | 0.203554021  | 0.00865112 | 0.028292077 |
| Ppp1r8    | 30  | 1.234150977 | 1.833139052 | 0.598988075  | 0.00865938 | 0.028312773 |
| Ube2z     | 81  | 1.00571999  | 1.227479627 | 0.221759637  | 0.00867731 | 0.028365097 |
| 30041F14F | 68  | 1.496513944 | 1.015479584 | -0.48103436  | 0.00868246 | 0.028375578 |
| Plk4      | 55  | 1.377511061 | 0.984158928 | -0.393352133 | 0.00874116 | 0.028561088 |
| Rnf2      | 95  | 1.905896463 | 1.46539769  | -0.440498772 | 0.00876588 | 0.028635463 |
| Nxph3     | 70  | 3.071363866 | 2.687842666 | -0.3835212   | 0.00878613 | 0.02869524  |
| Slc1a4    | 43  | 1.617903642 | 1.826218613 | 0.208314971  | 0.00879939 | 0.028732157 |
| Crip1     | 16  | 2.502825278 | 1.814125996 | -0.688699282 | 0.00884483 | 0.028874082 |
| Sbf1      | 49  | 1.469860689 | 1.167973083 | -0.301887606 | 0.00884747 | 0.028876295 |
| Hemk1     | 14  | 2.019533152 | 1.478271307 | -0.541261844 | 0.00886249 | 0.028918884 |
| Trex2     | 1   | 98.88888889 | 91.7721519  | -7.11673699  | 0.00886541 | 0.02892196  |
| Arih1     | 137 | 1.296670342 | 0.992050159 | -0.304620182 | 0.00890992 | 0.029060706 |
| Lrrc4c    | 4   | 38.10495323 | 33.74718442 | -4.35776881  | 0.00892898 | 0.029109933 |
| Unc45a    | 16  | 1.150308524 | 1.71930331  | 0.568994786  | 0.00892764 | 0.029109933 |
| Zswim7    | 40  | 1.342399309 | 1.89024661  | 0.547847301  | 0.0089581  | 0.029198399 |
| Cdk2ap2   | 44  | 1.696138196 | 0.979442139 | -0.716696057 | 0.00896577 | 0.029216887 |
| Clic5     | 16  | 3.873318415 | 3.032305678 | -0.841012738 | 0.0089729  | 0.02923364  |
| Gm609     | 2   | 77.04126427 | 62.5        | -14.54126427 | 0.0089956  | 0.029301094 |
| Mir1199   | 50  | 1.738053704 | 1.171410228 | -0.566643476 | 0.00899792 | 0.029302144 |
| Manea     | 42  | 1.609065268 | 1.273728715 | -0.335336553 | 0.00900951 | 0.029333377 |
| Chmp2a    | 19  | 39.93833667 | 38.42589077 | -1.512445897 | 0.00904204 | 0.029426243 |
| Lancl3    | 7   | 25.44348612 | 21.51109539 | -3.932390739 | 0.0090417  | 0.029426243 |
| Ipo9      | 35  | 0.916651947 | 1.821859199 | 0.905207252  | 0.00904818 | 0.029439676 |
| Hgf       | 4   | 20.66708769 | 16.84409371 | -3.822993973 | 0.00906766 | 0.029496513 |
| Mtdh      | 69  | 0.869423969 | 1.099480145 | 0.230056176  | 0.00912358 | 0.029671858 |
| S100a1    | 5   | 3.338943366 | 2.156392264 | -1.182551102 | 0.00913823 | 0.029712901 |
| Isoc2b    | 9   | 5.257477317 | 3.389522555 | -1.867954762 | 0.00916741 | 0.029801185 |
| Zdhhc1    | 17  | 1.305022895 | 1.949900142 | 0.644877247  | 0.00917271 | 0.029805224 |

|          |     |             |             |              |            |             |
|----------|-----|-------------|-------------|--------------|------------|-------------|
| Hoxc4    | 2   | 14.01869159 | 6.402912263 | -7.615779326 | 0.00917244 | 0.029805224 |
| Gtf2e2   | 37  | 1.086980866 | 1.363585729 | 0.276604863  | 0.00919854 | 0.029880157 |
| Camk2n2  | 98  | 1.789740385 | 1.352572371 | -0.437168014 | 0.00919985 | 0.029880157 |
| Mir7053  | 5   | 94.86289296 | 91.00200685 | -3.860886104 | 0.00921645 | 0.029927448 |
| Dmrt1    | 36  | 44.56747252 | 46.96425106 | 2.396778545  | 0.00922864 | 0.02996041  |
| Msh3     | 56  | 1.726136933 | 1.187591862 | -0.538545071 | 0.00923421 | 0.029971849 |
| Hes2     | 8   | 4.114963737 | 6.53227492  | 2.417311184  | 0.00924939 | 0.030013693 |
| Shprh    | 57  | 1.366808592 | 1.002954416 | -0.363854177 | 0.00925119 | 0.030013693 |
| Rab44    | 4   | 80.03130989 | 84.53809892 | 4.50678903   | 0.00926661 | 0.030057094 |
| Mslnl    | 7   | 77.27994398 | 73.93088401 | -3.349059971 | 0.00930717 | 0.030181962 |
| Tph1     | 8   | 4.272484658 | 2.346481825 | -1.926002834 | 0.00931841 | 0.030211741 |
| Mir6952  | 13  | 96.4606397  | 95.53669361 | -0.923946086 | 0.00933416 | 0.030256124 |
| Slc25a14 | 23  | 19.25118988 | 16.55265834 | -2.698531547 | 0.00935009 | 0.030301051 |
| Cort     | 6   | 94.5116623  | 89.51170912 | -4.999953182 | 0.00936794 | 0.030352219 |
| Kifc5b   | 8   | 1.85335137  | 1.142751329 | -0.710600041 | 0.00937264 | 0.030360726 |
| Agap1    | 107 | 1.345070383 | 1.165463779 | -0.179606604 | 0.00940523 | 0.030459584 |
| Rpl31    | 32  | 1.907032156 | 1.337204826 | -0.569827329 | 0.00941102 | 0.030471591 |
| Med13    | 64  | 1.693084157 | 1.094547492 | -0.598536664 | 0.00941917 | 0.030491266 |
| Nop10    | 7   | 96.91240444 | 95.46505987 | -1.447344569 | 0.00942765 | 0.030511985 |
| Abca12   | 1   | 93.10344828 | 100         | 6.896551724  | 0.00943355 | 0.030524358 |
| Dusp26   | 25  | 33.04218793 | 35.36140758 | 2.319219654  | 0.00944045 | 0.030539938 |
| Ppfia2   | 7   | 19.76353224 | 24.35131348 | 4.587781245  | 0.00944756 | 0.030556204 |
| Ccdc40   | 30  | 3.095771062 | 1.752482391 | -1.343288671 | 0.00948819 | 0.030680846 |
| Mir1957b | 3   | 91.51009317 | 94.03508772 | 2.524994552  | 0.00949123 | 0.03068392  |
| AW551984 | 3   | 19.1665261  | 11.07966457 | -8.086861531 | 0.00949924 | 0.030703059 |
| Tusc3    | 44  | 1.179969904 | 1.541676512 | 0.361706608  | 0.00950402 | 0.030711734 |
| Grin2a   | 28  | 60.74190235 | 57.61225631 | -3.129646036 | 0.00951052 | 0.03072597  |
| Pwwp2b   | 131 | 3.797197436 | 3.082398246 | -0.71479919  | 0.00953567 | 0.030800437 |
| Supt5    | 32  | 1.645277522 | 1.277355401 | -0.367922121 | 0.00956053 | 0.030873946 |
| Pold3    | 34  | 1.077720003 | 0.738120539 | -0.339599463 | 0.00958741 | 0.030953927 |
| Garem    | 104 | 1.690590466 | 1.422616407 | -0.267974059 | 0.00959779 | 0.030980645 |
| Wdr93    | 10  | 1.949898443 | 3.111895496 | 1.161997053  | 0.00967246 | 0.031214804 |
| Lingo4   | 4   | 13.25713466 | 12.66361723 | -0.593517436 | 0.00969464 | 0.031276179 |
| Kitl     | 60  | 2.306961997 | 1.789740032 | -0.517221964 | 0.00969574 | 0.031276179 |

|            |     |             |             |              |            |             |
|------------|-----|-------------|-------------|--------------|------------|-------------|
| Mir1982    | 5   | 38.87381202 | 34.65477058 | -4.219041436 | 0.00971067 | 0.031317442 |
| '00003G13F | 1   | 69.60784314 | 83.56164384 | 13.9538007   | 0.00973107 | 0.031376345 |
| Mab2112    | 2   | 72.33747042 | 78.55643254 | 6.218962122  | 0.00975071 | 0.031432753 |
| Scmh1      | 49  | 1.47990115  | 1.100635169 | -0.379265981 | 0.0097652  | 0.031472556 |
| Pde6c      | 8   | 94.6594523  | 92.74556327 | -1.913889032 | 0.00982408 | 0.031655366 |
| Ppara      | 79  | 3.389319129 | 4.524656428 | 1.135337299  | 0.00984926 | 0.031729549 |
| Pard3      | 103 | 1.66592414  | 1.411133739 | -0.254790401 | 0.00985288 | 0.031734232 |
| Snord100   | 1   | 0           | 3.521126761 | 3.521126761  | 0.00986358 | 0.031761728 |
| Nova2      | 27  | 6.017488275 | 7.931607326 | 1.914119051  | 0.00987199 | 0.031781817 |
| Nr1i3      | 1   | 91.56626506 | 77.52808989 | -14.03817517 | 0.00988498 | 0.031816671 |
| Sun1       | 72  | 1.41523137  | 0.949041377 | -0.466189993 | 0.009901   | 0.031861252 |
| P2ry1      | 22  | 12.99491067 | 11.35270975 | -1.642200917 | 0.0099301  | 0.031947872 |
| Tstd1      | 5   | 81.64475901 | 72.97284024 | -8.671918778 | 0.00998829 | 0.032128057 |
| Etfb       | 12  | 1.430574122 | 3.006972976 | 1.576398854  | 0.01000339 | 0.032169578 |
| Megf9      | 85  | 1.767870064 | 1.43753584  | -0.330334224 | 0.01001603 | 0.032203148 |
| Ndufaf7    | 9   | 0.723521384 | 1.445228102 | 0.721706717  | 0.01002347 | 0.032220018 |
| Gan        | 104 | 1.052810474 | 0.858534748 | -0.194275726 | 0.01004547 | 0.032283682 |
| Bambi-ps1  | 15  | 4.346879905 | 3.227295392 | -1.119584513 | 0.01004846 | 0.032286209 |
| Psph       | 5   | 1.185025586 | 3.144016227 | 1.958990641  | 0.01005983 | 0.032315656 |
| Glis1      | 95  | 4.629928017 | 4.319229426 | -0.310698591 | 0.01008006 | 0.032373545 |
| Nr0b2      | 4   | 54.08108991 | 48.13989163 | -5.941198278 | 0.01009461 | 0.032413204 |
| Bmp4       | 4   | 30.53245011 | 40.02215487 | 9.48970476   | 0.01012025 | 0.032488417 |
| Mir684-1   | 5   | 65.67832726 | 58.48726544 | -7.191061822 | 0.01013868 | 0.032540446 |
| Fbxw5      | 20  | 2.256915247 | 1.684447279 | -0.572467967 | 0.01014613 | 0.032557255 |
| Rin2       | 5   | 2.426082141 | 0.821608947 | -1.604473194 | 0.01017541 | 0.032644058 |
| Usp44      | 3   | 47.04981376 | 58.37857224 | 11.32875849  | 0.01018145 | 0.032656295 |
| Pitx3      | 33  | 11.8594272  | 10.69509133 | -1.164335863 | 0.0102069  | 0.032730792 |
| Zcrb1      | 58  | 1.240273572 | 1.086200456 | -0.154073116 | 0.01021338 | 0.032744391 |
| Vegfa      | 23  | 1.997930244 | 1.563963111 | -0.433967133 | 0.01022558 | 0.032776353 |
| Clybl      | 15  | 2.120473473 | 1.729620588 | -0.390852886 | 0.01024479 | 0.032830754 |
| '00047M11f | 3   | 93.95499771 | 86.34406168 | -7.610936031 | 0.01025539 | 0.03285756  |
| Akr1b8     | 11  | 8.142013363 | 10.01018796 | 1.868174594  | 0.0102603  | 0.032866118 |
| Enho       | 14  | 2.779449221 | 1.842832116 | -0.936617105 | 0.01026488 | 0.032873611 |
| Rrm2       | 21  | 1.173264581 | 0.558397635 | -0.614866946 | 0.01031086 | 0.033013643 |

|            |    |             |             |              |            |             |
|------------|----|-------------|-------------|--------------|------------|-------------|
| i00023N17F | 28 | 1.587330035 | 1.173223724 | -0.414106311 | 0.0103399  | 0.03309941  |
| Msh4       | 15 | 94.55797431 | 91.94577861 | -2.612195691 | 0.01035002 | 0.033124565 |
| Ptpru      | 72 | 1.785112808 | 1.529094653 | -0.256018155 | 0.01036384 | 0.033161569 |
| Ly6h       | 90 | 21.76107218 | 23.79593545 | 2.034863264  | 0.01038115 | 0.033209714 |
| Incenp     | 60 | 1.342899172 | 1.033514842 | -0.30938433  | 0.01042393 | 0.033339313 |
| Spatc1     | 4  | 90.67148819 | 84.32400932 | -6.347478866 | 0.0104644  | 0.033461446 |
| Faim2      | 5  | 72.56108974 | 63.13785225 | -9.42323749  | 0.01046822 | 0.033466359 |
| Ndufs1     | 18 | 0.963022299 | 2.058455165 | 1.095432866  | 0.01047846 | 0.033491824 |
| Sult4a1    | 39 | 44.37473911 | 42.71430478 | -1.660434335 | 0.01048516 | 0.033505935 |
| Cyfip2     | 59 | 13.57291451 | 15.50404038 | 1.93112587   | 0.01054425 | 0.033687429 |
| Ccdc113    | 5  | 86.34191282 | 82.17139774 | -4.170515074 | 0.01055712 | 0.033721182 |
| Hmx2       | 51 | 3.04475304  | 4.473984642 | 1.429231602  | 0.0105661  | 0.033742524 |
| Mettl22    | 24 | 22.80616052 | 20.82943825 | -1.976722274 | 0.01058603 | 0.033798837 |
| Rpl30      | 30 | 1.410220133 | 2.052180336 | 0.641960203  | 0.01060041 | 0.033837388 |
| 5-Sep      | 73 | 2.18830326  | 1.687987323 | -0.500315936 | 0.01061593 | 0.033879546 |
| Odc1       | 84 | 8.949956147 | 9.797056044 | 0.847099898  | 0.01063548 | 0.033934558 |
| Pard6g     | 45 | 7.054211548 | 6.282207955 | -0.772003593 | 0.01065418 | 0.033986848 |
| 30151L19F  | 52 | 1.278276792 | 0.922729753 | -0.355547039 | 0.010659   | 0.033994816 |
| Klc4       | 14 | 6.869219679 | 4.909685238 | -1.959534441 | 0.01069038 | 0.034087498 |
| Stradb     | 32 | 1.579066818 | 2.399185659 | 0.820118841  | 0.0106955  | 0.034096419 |
| Srf        | 88 | 1.676141104 | 1.340234416 | -0.335906689 | 0.01071582 | 0.03415121  |
| Rgs9       | 5  | 2.933693742 | 1.35364689  | -1.580046853 | 0.01071735 | 0.03415121  |
| Spp12b     | 44 | 1.856815836 | 1.339274333 | -0.517541504 | 0.01074412 | 0.034229083 |
| Slmo1      | 27 | 1.447102856 | 0.995166955 | -0.451935902 | 0.01074766 | 0.034232942 |
| Sgcb       | 17 | 5.120524102 | 8.154067955 | 3.033543853  | 0.01080451 | 0.034406552 |
| Tvp23b     | 29 | 2.129881694 | 1.495891356 | -0.633990339 | 0.01082101 | 0.034451625 |
| S1pr1      | 10 | 14.82979228 | 20.51773002 | 5.687937739  | 0.01082573 | 0.034459162 |
| 30035M05F  | 2  | 6.18729097  | 4.06504065  | -2.122250319 | 0.01085355 | 0.034540229 |
| Igfbp6     | 18 | 81.35088338 | 83.17813103 | 1.827247653  | 0.01094123 | 0.034811714 |
| '00027A15F | 1  | 70.11494253 | 54.41860465 | -15.69633788 | 0.01102837 | 0.035081369 |
| Oas2       | 2  | 46.74447174 | 39.70449583 | -7.039975913 | 0.01103427 | 0.035092529 |
| Arhgef15   | 2  | 76.83758113 | 70.90484794 | -5.932733197 | 0.01104599 | 0.03512219  |
| 30454E08F  | 29 | 1.399834175 | 0.837889855 | -0.56194432  | 0.01111011 | 0.035318393 |
| Gm14207    | 54 | 2.448465972 | 1.958976934 | -0.489489038 | 0.01111296 | 0.03531982  |



|            |     |             |             |              |            |             |
|------------|-----|-------------|-------------|--------------|------------|-------------|
| Mfsd1      | 9   | 1.820128699 | 0.55011822  | -1.270010479 | 0.01112404 | 0.035347362 |
| Mb21d2     | 38  | 1.803061226 | 1.123537313 | -0.679523913 | 0.0111379  | 0.035383766 |
| Slc41a1    | 19  | 1.44700265  | 0.789138046 | -0.657864605 | 0.01116489 | 0.035461833 |
| Tmod2      | 21  | 14.35875663 | 13.07751667 | -1.281239959 | 0.01117935 | 0.035500068 |
| Cln6       | 46  | 1.086689465 | 0.848972108 | -0.237717357 | 0.01120152 | 0.03556277  |
| Ppp2r1a    | 35  | 1.73108238  | 0.996816675 | -0.734265705 | 0.0112461  | 0.035696572 |
| Nlgn2      | 2   | 41.63059027 | 49.42091929 | 7.790329018  | 0.01129608 | 0.035847464 |
| Zbtb5      | 56  | 1.610093244 | 1.155956615 | -0.454136628 | 0.01130401 | 0.03586489  |
| Creb3l4    | 7   | 61.3420058  | 57.81575349 | -3.526252304 | 0.01132497 | 0.035923622 |
| Tuba1c     | 21  | 1.702052933 | 1.063699909 | -0.638353024 | 0.01135563 | 0.036013064 |
| Mical2     | 6   | 3.262855598 | 1.616513256 | -1.646342342 | 0.01137955 | 0.036081146 |
| Scn9a      | 6   | 38.59097456 | 46.64614122 | 8.055166657  | 0.0113871  | 0.03609727  |
| Cdkl5      | 33  | 18.93972231 | 16.79547986 | -2.144242454 | 0.01140211 | 0.036137058 |
| Il15       | 11  | 2.075989124 | 3.527951373 | 1.451962249  | 0.01140632 | 0.036142579 |
| Polq       | 19  | 2.173936082 | 1.709475477 | -0.464460604 | 0.011422   | 0.036184475 |
| SO0009L16F | 4   | 17.97498057 | 12.39793051 | -5.577050063 | 0.01142656 | 0.036186477 |
| Rbm33      | 95  | 1.25919854  | 1.021550756 | -0.237647784 | 0.01142757 | 0.036186477 |
| Fblim1     | 21  | 4.228673914 | 3.845268235 | -0.383405679 | 0.0114328  | 0.036195241 |
| Elmod2     | 43  | 1.227829501 | 0.846214459 | -0.381615041 | 0.01144373 | 0.036219663 |
| Ube2d1     | 83  | 1.520806657 | 1.337697491 | -0.183109166 | 0.01144545 | 0.036219663 |
| Med16      | 10  | 0.518685567 | 2.471907936 | 1.953222369  | 0.01150176 | 0.036382147 |
| Cemip      | 10  | 1.257149819 | 2.133832104 | 0.876682285  | 0.01149929 | 0.036382147 |
| Plekho1    | 127 | 1.271110884 | 1.063877107 | -0.207233777 | 0.01157049 | 0.036584511 |
| Cnksr3     | 57  | 1.180572154 | 0.785102512 | -0.395469642 | 0.01157072 | 0.036584511 |
| Lactbl1    | 3   | 66.91989187 | 75.4198941  | 8.500002231  | 0.01157741 | 0.036597791 |
| Fig4       | 2   | 9.418587579 | 4.236378713 | -5.182208866 | 0.01162283 | 0.036733445 |
| Gata5os    | 7   | 95.99114888 | 94.01839724 | -1.972751632 | 0.01163561 | 0.036765922 |
| Mir7116    | 2   | 100         | 97.65317421 | -2.346825787 | 0.01170417 | 0.036974599 |
| Sec1       | 7   | 95.70767875 | 98.3489652  | 2.641286442  | 0.0117447  | 0.03709464  |
| Ctnna2     | 43  | 48.64562407 | 46.11668001 | -2.528944056 | 0.01177328 | 0.037176919 |
| Smtnl2     | 37  | 3.656994964 | 2.527652448 | -1.129342516 | 0.01178962 | 0.037220486 |
| Mmp24      | 100 | 2.810862106 | 2.098436541 | -0.712425564 | 0.01179907 | 0.037242308 |
| Tmbim1     | 52  | 1.077616116 | 1.496895446 | 0.41927933   | 0.01191557 | 0.037601942 |
| Kcnj10     | 18  | 16.33137874 | 13.25495671 | -3.076422025 | 0.01195287 | 0.037711544 |

|            |     |             |             |              |            |             |
|------------|-----|-------------|-------------|--------------|------------|-------------|
| Irs4       | 27  | 53.53590889 | 51.03124882 | -2.504660062 | 0.01199414 | 0.037833609 |
| Zfp266     | 21  | 0.957434788 | 1.610819916 | 0.653385128  | 0.01199833 | 0.037838694 |
| Unc93b1    | 8   | 23.46067287 | 26.20443564 | 2.743762766  | 0.01200206 | 0.037842329 |
| Anp32b     | 115 | 1.343197916 | 0.980252925 | -0.362944991 | 0.01202573 | 0.037908825 |
| Epb4.1l1   | 62  | 2.182863636 | 1.336177437 | -0.846686199 | 0.01205451 | 0.037991385 |
| Gata4      | 51  | 2.840329106 | 2.261311619 | -0.579017487 | 0.01211226 | 0.038165192 |
| Lims2      | 22  | 4.9609722   | 7.137256355 | 2.176284155  | 0.01211993 | 0.038181163 |
| Pcsk1      | 6   | 25.15798487 | 24.84389453 | -0.31409034  | 0.01213778 | 0.038229177 |
| Casp9      | 12  | 2.449087512 | 1.249897408 | -1.199190104 | 0.01215773 | 0.038283793 |
| Ftsj3      | 16  | 1.611413254 | 0.993738851 | -0.617674403 | 0.01216305 | 0.03829234  |
| Sft2d1     | 12  | 2.424512801 | 1.584865569 | -0.839647232 | 0.01220663 | 0.038421311 |
| Elac2      | 20  | 2.835159327 | 2.015988978 | -0.819170349 | 0.01222157 | 0.038460057 |
| Ide        | 1   | 96.72131148 | 100         | 3.278688525  | 0.01222742 | 0.038470221 |
| Grm4       | 1   | 83.58208955 | 65.33333333 | -18.24875622 | 0.01224012 | 0.038501927 |
| Tmem51os1  | 39  | 1.532444895 | 1.226016726 | -0.306428169 | 0.01226491 | 0.038571644 |
| Dennd2d    | 14  | 6.371287181 | 8.536309535 | 2.165022353  | 0.01231095 | 0.038708149 |
| Psme2      | 17  | 1.85473226  | 2.720851471 | 0.866119211  | 0.01231477 | 0.038711864 |
| 130515G01F | 99  | 1.034446506 | 1.185699772 | 0.151253266  | 0.01233653 | 0.038771939 |
| Zfp551     | 3   | 20.83731132 | 15.435132   | -5.402179327 | 0.01236631 | 0.038857212 |
| Sertm1     | 22  | 42.48492386 | 45.50820166 | 3.023277795  | 0.01237877 | 0.038888039 |
| Sh3gl2     | 16  | 28.98413166 | 26.1412872  | -2.842844457 | 0.0123828  | 0.038892368 |
| Edn1       | 2   | 0           | 3.689299979 | 3.689299979  | 0.01239087 | 0.038909386 |
| Hunk       | 79  | 5.123898996 | 5.671712167 | 0.547813171  | 0.01241548 | 0.03897834  |
| Atp5j2     | 18  | 1.717280997 | 1.026123684 | -0.691157313 | 0.01242044 | 0.038985566 |
| Sun3       | 10  | 3.451790512 | 2.431351906 | -1.020438606 | 0.01244354 | 0.039049737 |
| Lpgat1     | 94  | 1.251663562 | 1.484982585 | 0.233319023  | 0.01245788 | 0.039086358 |
| Tango2     | 25  | 1.100408482 | 1.503163806 | 0.402755324  | 0.01247904 | 0.039144379 |
| 110009B22F | 40  | 2.148541599 | 1.159985088 | -0.988556511 | 0.01256892 | 0.03941789  |
| Fam84b     | 12  | 0.979163005 | 1.593150182 | 0.613987177  | 0.01262779 | 0.039594059 |
| 700011E24F | 9   | 91.26166392 | 94.73676852 | 3.475104599  | 0.01263801 | 0.039617634 |
| Ranbp9     | 225 | 0.997273182 | 1.129987246 | 0.132714064  | 0.01266832 | 0.039704184 |
| Suox       | 34  | 2.040744254 | 1.291034447 | -0.749709807 | 0.0126784  | 0.039718791 |
| Vamp5      | 42  | 1.791387517 | 1.540223785 | -0.251163732 | 0.01267722 | 0.039718791 |
| Saxo2      | 30  | 1.054290821 | 1.378484393 | 0.324193571  | 0.01275178 | 0.039940159 |

|          |     |             |             |              |            |             |
|----------|-----|-------------|-------------|--------------|------------|-------------|
| Blvra    | 24  | 2.249624111 | 1.324050104 | -0.925574008 | 0.01277414 | 0.04000165  |
| Ptk2     | 99  | 1.253480835 | 1.162521683 | -0.090959152 | 0.01277975 | 0.040010693 |
| Adssl1   | 31  | 1.987852776 | 1.363659449 | -0.624193327 | 0.0127921  | 0.040040815 |
| Mmd      | 67  | 1.386389491 | 1.454138053 | 0.067748562  | 0.01282554 | 0.040136911 |
| Rab3d    | 24  | 1.467960773 | 0.816177727 | -0.651783046 | 0.01287165 | 0.040264051 |
| Selt     | 45  | 1.351278915 | 0.86649096  | -0.484787955 | 0.01286911 | 0.040264051 |
| Adam22   | 31  | 16.91528205 | 20.39503394 | 3.479751894  | 0.01291057 | 0.040377163 |
| Adra2b   | 39  | 14.47125643 | 17.58142862 | 3.110172186  | 0.01294749 | 0.040484002 |
| Chgb     | 17  | 11.03016311 | 10.94381567 | -0.086347444 | 0.01296693 | 0.040536154 |
| Lrsam1   | 4   | 1.7578125   | 2.521728759 | 0.763916259  | 0.01297396 | 0.040549501 |
| H2-L     | 43  | 3.815283928 | 3.26991248  | -0.545371448 | 0.01298874 | 0.040587032 |
| Abcc3    | 12  | 4.964813197 | 6.081544801 | 1.116731604  | 0.01303082 | 0.040709857 |
| Prkrip1  | 26  | 1.377432907 | 0.97111116  | -0.406321307 | 0.01305344 | 0.040764762 |
| Zfp865   | 32  | 2.365967532 | 1.765322412 | -0.600645121 | 0.01305395 | 0.040764762 |
| Psm5     | 18  | 2.304763289 | 2.883832672 | 0.579069383  | 0.01311306 | 0.040940648 |
| Scp2     | 14  | 1.280202984 | 0.367588099 | -0.912614885 | 0.01313792 | 0.041009546 |
| Fam110a  | 63  | 2.391086575 | 1.565142594 | -0.825943981 | 0.01318174 | 0.041137584 |
| Cdc40    | 15  | 0.907519914 | 1.928773954 | 1.02125404   | 0.01319493 | 0.04116999  |
| Atp8b2   | 55  | 1.663875579 | 1.516577051 | -0.147298528 | 0.0132054  | 0.041193879 |
| Pde9a    | 21  | 2.146008894 | 1.64227598  | -0.503732915 | 0.01322431 | 0.041244099 |
| Sema3d   | 6   | 13.16771692 | 8.893480906 | -4.274236017 | 0.01330616 | 0.041490566 |
| Pcdh1    | 6   | 3.789693989 | 1.6095497   | -2.18014429  | 0.01334916 | 0.041615804 |
| B3galt4  | 39  | 2.482650852 | 2.080031361 | -0.402619492 | 0.01337329 | 0.041673312 |
| Elovl5   | 70  | 0.981166706 | 1.126470547 | 0.145303841  | 0.01337105 | 0.041673312 |
| Dact2    | 59  | 21.69150116 | 21.32926075 | -0.362240414 | 0.01341798 | 0.041803699 |
| Cript    | 9   | 1.131186245 | 2.578445116 | 1.44725887   | 0.01347885 | 0.041984431 |
| Jmjd1c   | 134 | 1.16819141  | 1.023837041 | -0.14435437  | 0.0135011  | 0.042044809 |
| Ctrl     | 2   | 94.82142857 | 89.18496387 | -5.636464703 | 0.01351221 | 0.042070465 |
| Arhgap33 | 61  | 3.398170165 | 4.668752475 | 1.27058231   | 0.01352753 | 0.042109242 |
| Creg1    | 31  | 0.909506462 | 1.535392532 | 0.62588607   | 0.01353944 | 0.04213739  |
| Rgl3     | 20  | 15.69188167 | 18.03998216 | 2.348100491  | 0.01362891 | 0.042406828 |
| Elp4     | 23  | 1.46341988  | 1.250774421 | -0.212645459 | 0.01367331 | 0.042535962 |
| Terf2    | 3   | 2.018131652 | 3.905373628 | 1.887241977  | 0.01370127 | 0.04261391  |
| Wdr20rt  | 16  | 93.0721954  | 91.37120615 | -1.700989254 | 0.01370427 | 0.042614212 |

|            |    |             |             |              |            |             |
|------------|----|-------------|-------------|--------------|------------|-------------|
| Mir99ahg   | 7  | 2.397971871 | 1.917951905 | -0.480019967 | 0.01370818 | 0.042617343 |
| Xkr4       | 85 | 28.5128382  | 30.46142548 | 1.948587273  | 0.01372421 | 0.042658134 |
| Glis2      | 77 | 1.31909415  | 1.633842013 | 0.314747862  | 0.01375393 | 0.042741454 |
| Rpl35      | 66 | 1.581035202 | 2.080510923 | 0.499475721  | 0.01375842 | 0.042746372 |
| Ica1       | 32 | 1.373408037 | 0.947789643 | -0.425618394 | 0.01377241 | 0.042780772 |
| Rnh1       | 40 | 1.874132212 | 1.438607577 | -0.435524635 | 0.01379449 | 0.042840285 |
| Mri1       | 39 | 1.568331435 | 1.161638472 | -0.406692963 | 0.01387478 | 0.043080502 |
| Zfp932     | 4  | 4.21592185  | 2.249056604 | -1.966865246 | 0.01390566 | 0.043167255 |
| Rtel1      | 18 | 1.656844782 | 0.88902091  | -0.767823872 | 0.01391383 | 0.043183503 |
| Rasgef1a   | 5  | 2.676429941 | 1.179238427 | -1.497191513 | 0.01394493 | 0.04327086  |
| Svop       | 15 | 4.795654779 | 6.08324797  | 1.287593192  | 0.01395516 | 0.043284298 |
| Mettl7a3   | 2  | 37.62012987 | 29.6477173  | -7.972412574 | 0.01395433 | 0.043284298 |
| Mast4      | 41 | 27.67034242 | 29.41441713 | 1.744074702  | 0.01399319 | 0.043393079 |
| Snx8       | 47 | 1.523327853 | 1.993944679 | 0.470616826  | 0.01400748 | 0.043428209 |
| Lonp2      | 16 | 2.323503819 | 1.387644642 | -0.935859176 | 0.01403229 | 0.043495947 |
| Fyttd1     | 68 | 1.226512648 | 1.074202082 | -0.152310566 | 0.01403918 | 0.043508111 |
| Ufsp1      | 23 | 2.140391894 | 1.69788066  | -0.442511233 | 0.01405555 | 0.043549652 |
| Cbfb       | 85 | 1.154446593 | 1.263965782 | 0.109519188  | 0.01417537 | 0.043911626 |
| Tmem246    | 14 | 1.301556179 | 2.187700075 | 0.886143896  | 0.01418228 | 0.043923763 |
| Trim26     | 66 | 1.578389586 | 1.311728981 | -0.266660605 | 0.01419033 | 0.043939404 |
| Swsap1     | 1  | 12.67605634 | 2.53164557  | -10.14441077 | 0.01419953 | 0.043958639 |
| Car2       | 74 | 2.281498571 | 2.518622042 | 0.237123472  | 0.01423169 | 0.044048894 |
| Cib2       | 44 | 6.175641484 | 8.410213652 | 2.234572168  | 0.01431472 | 0.044296528 |
| Exosc6     | 59 | 0.92539984  | 1.063143233 | 0.137743393  | 0.01432463 | 0.044317856 |
| .30017N08F | 9  | 58.11750432 | 60.42671997 | 2.309215653  | 0.01437744 | 0.04447188  |
| '00046A07F | 4  | 41.80501315 | 36.23272842 | -5.572284728 | 0.01441492 | 0.044578401 |
| Rab31      | 76 | 1.853525454 | 1.519058206 | -0.334467248 | 0.01441884 | 0.04458112  |
| Car3       | 17 | 25.27439936 | 23.50618231 | -1.768217049 | 0.01442316 | 0.044585084 |
| Vstm4      | 47 | 56.27789786 | 57.32976213 | 1.051864266  | 0.01443296 | 0.044605988 |
| Gm5617     | 32 | 5.929365733 | 8.432681969 | 2.503316236  | 0.01447038 | 0.044712213 |
| Ptprk      | 51 | 1.449471344 | 0.935868597 | -0.513602746 | 0.01451616 | 0.044834797 |
| Caln1      | 20 | 56.84940336 | 57.63745327 | 0.788049904  | 0.01451588 | 0.044834797 |
| Dmrt3      | 84 | 10.95446352 | 12.95910468 | 2.004641165  | 0.0145194  | 0.04483537  |
| Timp2      | 73 | 1.618316203 | 1.722474984 | 0.104158781  | 0.01455997 | 0.044951201 |

|             |     |             |             |              |            |             |
|-------------|-----|-------------|-------------|--------------|------------|-------------|
| Tmem14a     | 7   | 0.886699507 | 2.02876571  | 1.142066203  | 0.01459241 | 0.045033116 |
| Znhit6      | 5   | 0.306122449 | 1.312911446 | 1.006788997  | 0.01459264 | 0.045033116 |
| Cyp2s1      | 15  | 3.017971719 | 2.000938224 | -1.017033495 | 0.01463083 | 0.045141469 |
| Cat         | 2   | 5.303030303 | 0.689655172 | -4.613375131 | 0.0146671  | 0.045243857 |
| Phip        | 71  | 1.146722256 | 0.907558608 | -0.239163648 | 0.01470654 | 0.045355996 |
| Clcf1-pold4 | 9   | 2.273460906 | 0.920962156 | -1.35249875  | 0.0147469  | 0.0454709   |
| Srbd1       | 34  | 8.826324435 | 7.481639881 | -1.344684554 | 0.01475669 | 0.045491525 |
| Syce2       | 36  | 6.653267828 | 6.671861783 | 0.018593955  | 0.01478694 | 0.045575201 |
| Src         | 113 | 1.454735877 | 1.158118638 | -0.296617239 | 0.01480077 | 0.045608253 |
| Mprip       | 115 | 0.960017778 | 1.085656814 | 0.125639037  | 0.01482957 | 0.045687407 |
| Gtf3c2      | 2   | 2.083333333 | 0           | -2.083333333 | 0.01483492 | 0.045694281 |
| Il17ra      | 70  | 3.082369993 | 2.18116741  | -0.901202584 | 0.0148384  | 0.045695409 |
| Rps9        | 6   | 0.293525459 | 1.761541608 | 1.468016148  | 0.01484859 | 0.045717198 |
| '00080016F  | 4   | 83.72594378 | 78.50710971 | -5.218834072 | 0.01487382 | 0.045785281 |
| Gbp1        | 128 | 1.852169625 | 1.433710801 | -0.418458823 | 0.01488401 | 0.045807044 |
| Cnot6       | 42  | 0.832588387 | 1.229491594 | 0.396903207  | 0.01504549 | 0.0462943   |
| Arsk        | 7   | 3.970971766 | 6.57357847  | 2.602606704  | 0.01505066 | 0.046300505 |
| Optc        | 1   | 72.09302326 | 62.71676301 | -9.37626025  | 0.01507102 | 0.046353419 |
| Procr       | 9   | 1.65157051  | 1.19702012  | -0.454550389 | 0.01507741 | 0.046363361 |
| Thsd7a      | 21  | 4.066112519 | 3.267332936 | -0.798779583 | 0.01512586 | 0.046502598 |
| Gnpda2      | 29  | 2.719597039 | 1.908719039 | -0.810878    | 0.01516925 | 0.046626222 |
| Rom1        | 37  | 7.772583239 | 6.177314023 | -1.595269216 | 0.0151987  | 0.04670697  |
| Tbca        | 43  | 1.176064301 | 0.808588088 | -0.367476213 | 0.01525735 | 0.046877386 |
| Epo         | 9   | 36.95821098 | 35.02416261 | -1.934048374 | 0.01528368 | 0.046948454 |
| Zkscan4     | 5   | 5.295983087 | 2.582525937 | -2.71345715  | 0.0152912  | 0.046961717 |
| Dcaf13      | 22  | 1.658609803 | 0.971539056 | -0.687070747 | 0.01529793 | 0.046972545 |
| Hspa8       | 70  | 1.639158325 | 1.43073105  | -0.208427275 | 0.01532946 | 0.047059505 |
| Rin1        | 13  | 2.448470297 | 1.958714546 | -0.48975575  | 0.01535905 | 0.047140491 |
| Cmtr1       | 22  | 1.415059842 | 0.980173147 | -0.434886696 | 0.01541568 | 0.047304421 |
| 310010J17R  | 56  | 1.56976421  | 0.911376357 | -0.658387853 | 0.01542192 | 0.047313657 |
| Tec         | 34  | 2.072352044 | 1.612779044 | -0.459573001 | 0.0154557  | 0.0474074   |
| Rnf5        | 20  | 0.715136823 | 1.724064993 | 1.00892817   | 0.01547729 | 0.047463701 |
| Pitpnm2     | 119 | 1.692648376 | 1.921330979 | 0.228682603  | 0.01548675 | 0.047482763 |
| Pycr1       | 5   | 3.835346091 | 2.019480519 | -1.815865572 | 0.01550623 | 0.047532559 |

|             |     |             |             |              |            |             |
|-------------|-----|-------------|-------------|--------------|------------|-------------|
| Cnksr1      | 15  | 9.013408449 | 7.315357959 | -1.69805049  | 0.01554047 | 0.047627575 |
| Bola3       | 50  | 1.755148966 | 1.949818044 | 0.194669077  | 0.0155505  | 0.047648355 |
| Nt5c3       | 63  | 0.721001102 | 1.03177563  | 0.310774529  | 0.01558463 | 0.047742965 |
| Fam187b     | 19  | 12.52840524 | 11.55458785 | -0.973817391 | 0.01562912 | 0.04786928  |
| D8Erttd738e | 13  | 2.160879921 | 1.261167517 | -0.899712405 | 0.01570669 | 0.048096814 |
| Ncam1       | 14  | 3.622353716 | 2.011834375 | -1.610519341 | 0.01572788 | 0.048151664 |
| Cep126      | 49  | 2.249107182 | 1.797376861 | -0.451730322 | 0.01573555 | 0.048165081 |
| Eif2b3      | 30  | 8.037450982 | 7.433176548 | -0.604274434 | 0.01574216 | 0.048175267 |
| Slnf5       | 8   | 30.3274533  | 34.61091715 | 4.283463851  | 0.0157921  | 0.048318017 |
| Zpbp2       | 12  | 2.191379006 | 1.42058336  | -0.770795646 | 0.01582164 | 0.048398311 |
| Mir6935     | 37  | 0.928455007 | 1.554705165 | 0.626250158  | 0.015851   | 0.048478026 |
| Birc6       | 58  | 1.183739865 | 1.250475615 | 0.06673575   | 0.01586985 | 0.048525556 |
| Snhg12      | 11  | 19.02961731 | 17.02400248 | -2.005614837 | 0.01588526 | 0.048562555 |
| 10024B03F   | 6   | 1.115506332 | 0.431190995 | -0.684315337 | 0.01590949 | 0.048626496 |
| Myo6        | 57  | 1.636694636 | 1.894747395 | 0.258052759  | 0.01597188 | 0.048807036 |
| Csmd1       | 61  | 55.84114516 | 56.81041625 | 0.969271087  | 0.0160416  | 0.049009882 |
| Zfp30       | 19  | 2.573629495 | 2.085147603 | -0.488481891 | 0.01608392 | 0.049128929 |
| Hbs1l       | 30  | 1.6091629   | 1.12295472  | -0.48620818  | 0.01610093 | 0.049170661 |
| Bloc1s4     | 39  | 1.242351759 | 0.661341769 | -0.58100999  | 0.01612147 | 0.049223143 |
| Eif3k       | 6   | 0.957373072 | 2.252766726 | 1.295393654  | 0.01614043 | 0.049270785 |
| Mbp         | 44  | 17.38437208 | 15.95167131 | -1.432700774 | 0.01615545 | 0.049306365 |
| Fem1a       | 32  | 0.985331028 | 1.471925487 | 0.486594459  | 0.01616363 | 0.049321084 |
| En1         | 34  | 37.87445564 | 36.18365867 | -1.690796969 | 0.01617095 | 0.049333163 |
| Mir3569     | 69  | 2.602861953 | 1.78748444  | -0.815377513 | 0.01621911 | 0.049469817 |
| Dctn4       | 28  | 1.479385218 | 0.87482306  | -0.604562158 | 0.01624109 | 0.049516252 |
| Gm2a        | 13  | 4.944925352 | 6.631205074 | 1.686279721  | 0.01623778 | 0.049516252 |
| 132416K20F  | 1   | 89.91596639 | 80.44280443 | -9.473161959 | 0.01628469 | 0.049638867 |
| Dock8       | 120 | 1.286596571 | 1.071018852 | -0.215577718 | 0.01633008 | 0.049766904 |
| Zfp28       | 20  | 1.25181767  | 1.92936464  | 0.67754697   | 0.01636135 | 0.049851848 |
| Pls3        | 8   | 23.55811285 | 20.10303419 | -3.455078665 | 0.01637736 | 0.049890272 |
| Setd7       | 50  | 1.712776748 | 1.09842108  | -0.614355668 | 0.01638475 | 0.049902404 |
| Rasal3      | 5   | 66.33494908 | 61.40122471 | -4.933724366 | 0.01640972 | 0.049968106 |
| Cldn1       | 5   | 10.31215507 | 8.486994462 | -1.825160609 | 0.01649071 | 0.05020429  |
| Stk19       | 46  | 1.631840348 | 1.271762413 | -0.360077935 | 0.01655657 | 0.05039433  |

|            |     |             |             |              |            |             |
|------------|-----|-------------|-------------|--------------|------------|-------------|
| Tnfaip8l3  | 21  | 21.14979337 | 20.32768382 | -0.822109551 | 0.01657714 | 0.050446498 |
| Myl12b     | 77  | 1.58803133  | 1.196559104 | -0.391472226 | 0.01668225 | 0.050755813 |
| Mir684-2   | 2   | 95.51282051 | 88.7755102  | -6.737310309 | 0.01670235 | 0.050806445 |
| Ccdc64     | 157 | 1.465584201 | 1.143747085 | -0.321837116 | 0.01686406 | 0.051287727 |
| Slc5a8     | 4   | 33.0615942  | 38.99860398 | 5.937009779  | 0.01692507 | 0.051462603 |
| Rsrp1      | 55  | 1.366827787 | 1.114744821 | -0.252082966 | 0.01696934 | 0.051586525 |
| 30429F24F  | 9   | 2.039584975 | 0.825911861 | -1.213673114 | 0.01697316 | 0.051587442 |
| Ints2      | 9   | 2.207977208 | 0.696586929 | -1.511390279 | 0.0169838  | 0.051609089 |
| 700056E22F | 68  | 1.202350259 | 1.27126375  | 0.068913491  | 0.01699804 | 0.051641668 |
| Snrpa1     | 34  | 1.194210372 | 0.922798106 | -0.271412267 | 0.01710369 | 0.051941494 |
| 30020K01F  | 72  | 1.067020327 | 1.253545667 | 0.18652534   | 0.01710381 | 0.051941494 |
| Ppp2r5e    | 98  | 1.437345358 | 1.110830845 | -0.326514513 | 0.01711809 | 0.051963347 |
| Kif6       | 15  | 17.90259133 | 22.9037615  | 5.001170164  | 0.01711729 | 0.051963347 |
| Sec63      | 33  | 0.987231447 | 1.413987518 | 0.426756071  | 0.01712587 | 0.051976209 |
| Abcd2      | 5   | 11.77604203 | 8.309323947 | -3.466718088 | 0.01715487 | 0.05205348  |
| Rgs1       | 5   | 95.56235134 | 86.91882432 | -8.643527017 | 0.01716638 | 0.052068201 |
| '00125H20F | 8   | 0.947013248 | 2.073146529 | 1.126133282  | 0.01716682 | 0.052068201 |
| Sirt7      | 20  | 1.594938048 | 1.033378926 | -0.561559122 | 0.01718911 | 0.052125014 |
| Fgf17      | 17  | 35.62241442 | 34.69624951 | -0.926164915 | 0.0172064  | 0.052145199 |
| Gm1564     | 24  | 84.12103949 | 81.91074824 | -2.210291253 | 0.01720642 | 0.052145199 |
| Rnf148     | 1   | 70          | 48.14814815 | -21.85185185 | 0.01720178 | 0.052145199 |
| Uvssa      | 47  | 1.736026882 | 1.269773315 | -0.466253567 | 0.01722052 | 0.052177153 |
| Fut10      | 25  | 1.640393185 | 0.729506008 | -0.910887177 | 0.01723171 | 0.052189486 |
| Acin1      | 10  | 1.892690237 | 1.173484955 | -0.719205281 | 0.01723101 | 0.052189486 |
| Zfp273     | 6   | 2.16354911  | 1.517548323 | -0.646000786 | 0.01723741 | 0.052195996 |
| Ndufv3     | 2   | 0           | 1.428571429 | 1.428571429  | 0.0172465  | 0.052212744 |
| S100a11    | 20  | 2.18517292  | 1.688506753 | -0.496666167 | 0.0172589  | 0.052230712 |
| Mpdz       | 65  | 1.92091056  | 1.611706798 | -0.309203762 | 0.01725956 | 0.052230712 |
| Il17c      | 5   | 93.60683761 | 88.50809521 | -5.098742398 | 0.01728221 | 0.052288472 |
| Gabrq      | 6   | 47.46285039 | 39.94154568 | -7.521304713 | 0.01729124 | 0.052305033 |
| Hdac8      | 3   | 20.73107031 | 13.90166728 | -6.829403037 | 0.01730078 | 0.052323086 |
| Nfkb1      | 109 | 1.938595671 | 1.318130593 | -0.620465078 | 0.01733128 | 0.052404535 |
| Skida1     | 22  | 4.420727478 | 1.979350958 | -2.44137652  | 0.01734768 | 0.05244333  |
| Runx1      | 51  | 1.53593855  | 1.372936873 | -0.163001678 | 0.01736657 | 0.052489606 |

|         |     |             |             |              |            |             |
|---------|-----|-------------|-------------|--------------|------------|-------------|
| Nkain1  | 72  | 1.196988554 | 0.992521215 | -0.204467339 | 0.01743258 | 0.052678265 |
| Zbtb48  | 35  | 2.710063979 | 2.433862642 | -0.276201337 | 0.01745273 | 0.052704401 |
| Kif5b   | 57  | 1.501179617 | 1.302436325 | -0.198743291 | 0.0174546  | 0.052704401 |
| Agpat9  | 30  | 1.813836702 | 1.336432776 | -0.477403926 | 0.01745559 | 0.052704401 |
| Mrpl3   | 21  | 19.70317174 | 16.88377339 | -2.819398357 | 0.01745324 | 0.052704401 |
| Ssna1   | 23  | 1.265095928 | 0.875231873 | -0.389864055 | 0.01745964 | 0.052705781 |
| Inpp1   | 30  | 1.53544794  | 1.035299326 | -0.500148614 | 0.0174715  | 0.052730731 |
| Pam     | 78  | 2.133269878 | 1.695705688 | -0.43756419  | 0.01755925 | 0.052984677 |
| Chsy3   | 93  | 1.570369462 | 1.490423272 | -0.07994619  | 0.01759032 | 0.053067494 |
| Smg7    | 64  | 1.203899012 | 1.408008498 | 0.204109486  | 0.01761794 | 0.053128984 |
| Pxdn    | 14  | 2.982135993 | 2.128790377 | -0.853345616 | 0.01761605 | 0.053128984 |
| Eogt    | 34  | 1.843437467 | 1.20731547  | -0.636121997 | 0.01763319 | 0.053164045 |
| Pip4k2a | 70  | 0.941460593 | 1.197944357 | 0.256483764  | 0.0176498  | 0.053203185 |
| Usp35   | 16  | 66.5192531  | 68.94189449 | 2.422641386  | 0.01773005 | 0.053434117 |
| Fxyd1   | 1   | 40.4040404  | 25.2173913  | -15.1866491  | 0.01774855 | 0.053478899 |
| Qars    | 17  | 1.3893062   | 0.531254703 | -0.858051497 | 0.01779336 | 0.053602923 |
| Gcc1    | 8   | 1.788220318 | 0.866581777 | -0.921638541 | 0.01782162 | 0.053666019 |
| Adm2    | 3   | 46.80853217 | 39.95231395 | -6.856218221 | 0.01782028 | 0.053666019 |
| Cd1d1   | 4   | 7.750837872 | 11.58558568 | 3.834747804  | 0.01783723 | 0.053702004 |
| Pantr2  | 8   | 33.95477297 | 27.12221002 | -6.83256295  | 0.01785182 | 0.053734895 |
| Pde6d   | 27  | 1.963236128 | 1.234963219 | -0.728272908 | 0.01789001 | 0.053838809 |
| Ppp2r2b | 15  | 14.29048282 | 15.76542602 | 1.474943194  | 0.01789861 | 0.05385363  |
| Mfsd6   | 69  | 1.467532709 | 1.098949171 | -0.368583538 | 0.01790983 | 0.053876359 |
| Gm8580  | 1   | 83.56164384 | 92.46575342 | 8.904109589  | 0.01791864 | 0.053891792 |
| Angel2  | 76  | 1.188907717 | 0.846123418 | -0.342784298 | 0.01793627 | 0.053929857 |
| Tfcp2   | 52  | 1.607717138 | 1.339617604 | -0.268099534 | 0.01793864 | 0.053929857 |
| Ankrd27 | 30  | 1.852056135 | 2.317304961 | 0.465248826  | 0.01794866 | 0.053948936 |
| Lypd6   | 59  | 27.38484063 | 30.65245322 | 3.26761259   | 0.01796674 | 0.053992218 |
| Mtfr2   | 25  | 1.55375064  | 1.020453426 | -0.533297214 | 0.01797665 | 0.054010913 |
| Zfp954  | 3   | 4.081444629 | 0.843881857 | -3.237562772 | 0.01799491 | 0.054054715 |
| Kctd5   | 46  | 1.62366559  | 1.339142398 | -0.284523193 | 0.01803293 | 0.054157845 |
| Ero1l   | 87  | 1.286561359 | 0.870868314 | -0.415693045 | 0.01804323 | 0.054177678 |
| Zfp800  | 158 | 1.290542795 | 1.300258397 | 0.009715602  | 0.01805008 | 0.054187163 |
| Mpp3    | 77  | 2.595954753 | 1.616858435 | -0.979096318 | 0.01805403 | 0.054187939 |



|         |    |             |             |              |            |             |
|---------|----|-------------|-------------|--------------|------------|-------------|
| Mfsd5   | 67 | 1.13599461  | 1.279198598 | 0.143203987  | 0.01808021 | 0.054255405 |
| Snx5    | 93 | 1.164815277 | 1.302112261 | 0.137296984  | 0.01811239 | 0.054340878 |
| Rab30   | 4  | 2.489630459 | 1.366176236 | -1.123454223 | 0.01816925 | 0.054500333 |
| Adat2   | 13 | 1.167021166 | 0.313866055 | -0.853155111 | 0.0181809  | 0.054524134 |
| Tex2    | 64 | 1.25661783  | 1.561993396 | 0.305375566  | 0.01821983 | 0.054629714 |
| Nr4a1   | 45 | 1.978382129 | 3.055012432 | 1.076630303  | 0.01824706 | 0.054700183 |
| Recql4  | 28 | 1.456963814 | 0.990163642 | -0.466800172 | 0.01831136 | 0.054881706 |
| Usp22   | 30 | 1.515315695 | 0.880008249 | -0.635307445 | 0.01834804 | 0.054980411 |
| Gna13   | 78 | 1.879142819 | 1.248832483 | -0.630310337 | 0.01837585 | 0.055052521 |
| Per1    | 6  | 0.483091787 | 2.31004156  | 1.826949773  | 0.01841308 | 0.055152808 |
| Lingo3  | 56 | 14.64700212 | 16.51165024 | 1.864648114  | 0.01842439 | 0.055175421 |
| Khnyln  | 30 | 1.300481888 | 1.711353258 | 0.41087137   | 0.01842832 | 0.055175919 |
| Tcf15   | 46 | 21.98336947 | 23.85301538 | 1.86964591   | 0.01846608 | 0.055277707 |
| Gnl3l   | 25 | 19.4774898  | 16.86712123 | -2.61036857  | 0.01847922 | 0.05530576  |
| Lrch3   | 63 | 1.79808537  | 1.381623962 | -0.416461409 | 0.01851073 | 0.055388749 |
| Stoml2  | 22 | 1.252666348 | 1.524291018 | 0.27162467   | 0.01853533 | 0.055451056 |
| Atat1   | 14 | 2.376163932 | 1.682579928 | -0.693584004 | 0.01856576 | 0.055530774 |
| Gm15908 | 56 | 2.205838166 | 1.864266503 | -0.341571663 | 0.01859093 | 0.055594727 |
| Dhrs1   | 7  | 1.839037253 | 0.62467998  | -1.214357273 | 0.01860376 | 0.055621757 |
| Edc4    | 22 | 0.912519528 | 1.951441514 | 1.038921986  | 0.01863147 | 0.055685058 |
| Ctsb    | 25 | 1.270291549 | 0.63913738  | -0.631154169 | 0.01863252 | 0.055685058 |
| Aspm    | 26 | 1.48731925  | 0.974352292 | -0.512966958 | 0.0186761  | 0.055803926 |
| Epha3   | 17 | 26.49191323 | 25.73249555 | -0.759417681 | 0.01888435 | 0.056414692 |
| Fgd4    | 40 | 1.368278612 | 1.008515954 | -0.359762658 | 0.01889607 | 0.056438218 |
| Ttll10  | 2  | 30.31914894 | 23.21981424 | -7.099334695 | 0.0189201  | 0.056498487 |
| Snrpd2  | 3  | 3.289370123 | 1.442307692 | -1.847062431 | 0.01898777 | 0.056677486 |
| Nbeal2  | 63 | 1.244698714 | 0.974474791 | -0.270223923 | 0.01898426 | 0.056677486 |
| Ccdc74a | 83 | 6.875941107 | 6.420213177 | -0.45572793  | 0.01900447 | 0.056714065 |
| Nubpl   | 12 | 1.464889591 | 1.188083433 | -0.276806157 | 0.01900775 | 0.056714065 |
| Noxa1   | 12 | 71.99852108 | 69.58843691 | -2.41008417  | 0.01902947 | 0.056767312 |
| Armc1   | 12 | 1.906175007 | 2.146168884 | 0.239993877  | 0.01903832 | 0.056782189 |
| Copz2   | 21 | 2.607897604 | 3.392652483 | 0.784754879  | 0.01910729 | 0.056976297 |
| Cyp20a1 | 35 | 1.923765079 | 1.102984226 | -0.820780854 | 0.01912561 | 0.057019353 |
| Tfdp1   | 91 | 1.445431772 | 1.043266306 | -0.402165465 | 0.01914026 | 0.057051434 |

|           |     |             |             |              |            |             |
|-----------|-----|-------------|-------------|--------------|------------|-------------|
| Ap2a1     | 58  | 1.676684085 | 1.259830984 | -0.416853101 | 0.01914823 | 0.057052016 |
| Tnfsf9    | 11  | 0.634060967 | 1.69151613  | 1.057455163  | 0.01914807 | 0.057052016 |
| Grasp     | 44  | 1.581960199 | 1.382620295 | -0.199339905 | 0.01915553 | 0.057062155 |
| Zfp574    | 46  | 2.043543231 | 1.608702313 | -0.434840918 | 0.01918451 | 0.057136885 |
| Ets2      | 66  | 1.3417087   | 1.609818074 | 0.268109374  | 0.0191886  | 0.057137478 |
| Ophn1     | 34  | 15.41307832 | 14.16001126 | -1.253067055 | 0.01921032 | 0.057167368 |
| Zfp709    | 30  | 4.857754184 | 2.637584101 | -2.220170083 | 0.019205   | 0.057167368 |
| Wfdc2     | 1   | 26.93726937 | 19.06077348 | -7.876495892 | 0.01920892 | 0.057167368 |
| Galnt1    | 220 | 1.049316184 | 1.184105171 | 0.134788988  | 0.019231   | 0.057217295 |
| Pdgfb     | 38  | 1.636990625 | 1.145035185 | -0.49195544  | 0.0192419  | 0.057238125 |
| Mirc35hg  | 85  | 2.740271164 | 2.342059249 | -0.398211915 | 0.0192632  | 0.057289856 |
| Mknk1     | 5   | 2.772354883 | 1.397822644 | -1.374532239 | 0.01927977 | 0.057325744 |
| Slc25a3   | 56  | 1.228872585 | 1.580906435 | 0.35203385   | 0.01928308 | 0.057325744 |
| Ric3      | 40  | 51.23921574 | 53.45560513 | 2.21638939   | 0.0192924  | 0.057341848 |
| Cops3     | 45  | 4.660678879 | 5.370431514 | 0.709752635  | 0.01933719 | 0.057463326 |
| Rsad1     | 18  | 1.908786956 | 1.270849909 | -0.637937047 | 0.01937597 | 0.057566898 |
| Ccpg1     | 26  | 0.687484243 | 1.347386527 | 0.659902284  | 0.01938195 | 0.057573034 |
| 30011006F | 1   | 46.37681159 | 30          | -16.37681159 | 0.01943958 | 0.057732524 |
| Vldlr     | 42  | 4.425755114 | 4.852195491 | 0.426440377  | 0.01947265 | 0.057819046 |
| Arhgef40  | 73  | 3.137915044 | 2.102248926 | -1.035666118 | 0.01948066 | 0.057831115 |
| Gm10637   | 4   | 19.91212325 | 17.04948325 | -2.862639995 | 0.01962883 | 0.058235634 |
| Gm9866    | 3   | 89.05184569 | 85.19018778 | -3.86165791  | 0.01962768 | 0.058235634 |
| Pitx1     | 63  | 24.24636825 | 24.39324035 | 0.146872097  | 0.01962435 | 0.058235634 |
| Ksr2      | 44  | 9.816880527 | 10.5187507  | 0.701870174  | 0.01963536 | 0.058243225 |
| Cpne5     | 61  | 7.716083503 | 9.113628102 | 1.397544599  | 0.01967398 | 0.058346008 |
| Nrde2     | 3   | 0           | 2.046783626 | 2.046783626  | 0.01970574 | 0.058428389 |
| Nt5c2     | 101 | 11.22776863 | 11.98989226 | 0.762123631  | 0.01976924 | 0.058604811 |
| Tmem120b  | 55  | 1.443044054 | 1.165916871 | -0.277127182 | 0.01979257 | 0.058662123 |
| Frdm8     | 2   | 5.681818182 | 1.685393258 | -3.996424923 | 0.01989006 | 0.058939174 |
| Bloodlinc | 3   | 22.67379774 | 29.92565326 | 7.251855516  | 0.01989991 | 0.058946059 |
| Rnf10     | 40  | 2.408507279 | 1.298226841 | -1.110280438 | 0.01990042 | 0.058946059 |
| Zfp236    | 128 | 1.105694161 | 1.238896172 | 0.133202011  | 0.0199734  | 0.059138345 |
| Sprtn     | 66  | 0.96121343  | 1.080446951 | 0.119233521  | 0.01997165 | 0.059138345 |
| 10030007F | 18  | 8.468017774 | 10.44250486 | 1.974487085  | 0.01998222 | 0.05915252  |

|           |     |             |             |              |            |             |
|-----------|-----|-------------|-------------|--------------|------------|-------------|
| Lrig1     | 86  | 1.418728194 | 1.171918439 | -0.246809755 | 0.01998908 | 0.059160915 |
| St8sia6   | 58  | 10.97376448 | 10.86724496 | -0.106519521 | 0.02007157 | 0.059393069 |
| Kcnq2     | 71  | 15.08373765 | 17.12310584 | 2.039368188  | 0.02009521 | 0.059451025 |
| Uba5      | 41  | 1.260757635 | 1.813015438 | 0.552257803  | 0.02010607 | 0.059459193 |
| AF067063  | 3   | 88.56952859 | 83.82838284 | -4.741145756 | 0.02010338 | 0.059459193 |
| Slc17a6   | 10  | 38.1778526  | 41.55961208 | 3.381759474  | 0.02014915 | 0.059574569 |
| Mrps9     | 14  | 2.158231644 | 1.674302086 | -0.483929558 | 0.02021641 | 0.05976141  |
| Zfp354b   | 3   | 3.315118397 | 1.088490224 | -2.226628173 | 0.02024149 | 0.059811429 |
| Cyb5b     | 56  | 10.14620097 | 8.810930925 | -1.335270046 | 0.02024087 | 0.059811429 |
| Zfp945    | 10  | 5.868310533 | 3.991761411 | -1.876549122 | 0.02028704 | 0.059921913 |
| Rnf17     | 19  | 88.0055744  | 85.8878331  | -2.117741297 | 0.02028667 | 0.059921913 |
| Tspan15   | 24  | 2.768913051 | 1.665954944 | -1.102958107 | 0.0203974  | 0.060235739 |
| Adgrl3    | 22  | 3.680740459 | 2.721151697 | -0.959588762 | 0.02045003 | 0.060379015 |
| Fam73b    | 31  | 1.568435865 | 1.408320677 | -0.160115189 | 0.02051588 | 0.060561272 |
| Slc4a10   | 4   | 68.59469899 | 62.54598406 | -6.048714934 | 0.02053674 | 0.060610635 |
| Plscr3    | 14  | 1.984335174 | 1.261772002 | -0.722563172 | 0.02060529 | 0.060800724 |
| Tmed3     | 49  | 2.196897975 | 1.792549906 | -0.404348069 | 0.02062804 | 0.06085563  |
| Zfp62     | 24  | 1.178239762 | 1.646354171 | 0.46811441   | 0.02069152 | 0.061026408 |
| Thoc6     | 18  | 1.477044211 | 0.880931772 | -0.596112439 | 0.02069425 | 0.061026408 |
| Tspyl3    | 3   | 53.05673009 | 43.25955734 | -9.797172748 | 0.02070513 | 0.061046236 |
| Copb1     | 37  | 1.32913603  | 1.169316455 | -0.159819574 | 0.02070962 | 0.061047187 |
| Prss56    | 3   | 61.77777778 | 70.0909324  | 8.313154625  | 0.02071415 | 0.061048303 |
| Nt5c      | 30  | 1.471888494 | 0.976506366 | -0.495382128 | 0.02073262 | 0.061090458 |
| Smc2os    | 13  | 2.921399799 | 2.033762744 | -0.887637055 | 0.02076062 | 0.061160685 |
| Klf17     | 1   | 91.66666667 | 97.70114943 | 6.034482759  | 0.02076761 | 0.061168988 |
| Chp2      | 5   | 86.20728291 | 80.5432111  | -5.664071814 | 0.02077459 | 0.061177256 |
| Mpped2    | 48  | 46.00728071 | 44.93150045 | -1.075780261 | 0.02081505 | 0.061284109 |
| Fgf18     | 149 | 1.908225374 | 1.50424825  | -0.403977124 | 0.02083426 | 0.061328385 |
| C1qtnf5   | 14  | 72.64710663 | 74.99113401 | 2.34402738   | 0.02084789 | 0.061356191 |
| Nckap5    | 20  | 41.48828544 | 43.96216505 | 2.47387961   | 0.02086619 | 0.061397733 |
| Abhd17b   | 129 | 1.243252072 | 1.062364845 | -0.180887227 | 0.02087829 | 0.061421011 |
| 30406C13F | 16  | 2.183992207 | 1.963262999 | -0.220729207 | 0.02091494 | 0.061516489 |
| Cep170b   | 114 | 1.461449973 | 1.64246917  | 0.181019197  | 0.0209228  | 0.061527288 |
| Mir127    | 4   | 95.28121739 | 92.62323962 | -2.657977771 | 0.02093351 | 0.061546441 |

|          |     |             |             |              |            |             |
|----------|-----|-------------|-------------|--------------|------------|-------------|
| Gpat2    | 11  | 84.12866835 | 82.57441332 | -1.554255031 | 0.0209762  | 0.061659599 |
| Ece1     | 26  | 1.767635475 | 1.048327454 | -0.719308021 | 0.02099796 | 0.061711194 |
| Unc79    | 20  | 32.6486331  | 29.46771427 | -3.180918824 | 0.02101648 | 0.061753276 |
| Amotl2   | 24  | 0.969259926 | 1.954352763 | 0.985092837  | 0.0210349  | 0.061785006 |
| Mir7003  | 2   | 93.97216864 | 97.54998523 | 3.577816585  | 0.0210357  | 0.061785006 |
| Rgs10    | 96  | 1.96340574  | 1.402301027 | -0.561104713 | 0.02109051 | 0.061933587 |
| Pstpip2  | 72  | 8.496366789 | 8.179755316 | -0.316611473 | 0.02109973 | 0.061948271 |
| Zdhhc6   | 33  | 0.890283252 | 1.250039619 | 0.359756367  | 0.02113728 | 0.062046091 |
| Ldoc1    | 9   | 83.29998094 | 77.83142781 | -5.468553133 | 0.02116872 | 0.06212595  |
| Myl6b    | 5   | 3.217391799 | 1.091123449 | -2.12626835  | 0.02123698 | 0.06231382  |
| Praf2    | 5   | 16.95023148 | 21.79621721 | 4.845985724  | 0.02126384 | 0.062380167 |
| Mael     | 43  | 95.01616448 | 94.71368579 | -0.302478692 | 0.02139025 | 0.062738459 |
| Mpc2     | 53  | 1.644053504 | 1.133062753 | -0.510990751 | 0.02146294 | 0.062939092 |
| Gm16740  | 23  | 2.086845936 | 1.250507822 | -0.836338115 | 0.02148881 | 0.063002367 |
| Bmp6     | 96  | 13.16588477 | 14.20442294 | 1.038538162  | 0.02150825 | 0.063042912 |
| Rnf39    | 40  | 2.198770413 | 1.889104043 | -0.30966637  | 0.02151123 | 0.063042912 |
| Rcbtb1   | 101 | 1.166713115 | 1.267508639 | 0.100795524  | 0.02152104 | 0.063059046 |
| Axl      | 12  | 4.235602224 | 3.170814331 | -1.064787893 | 0.02160277 | 0.063285889 |
| Tfb2m    | 53  | 1.450029054 | 1.30621401  | -0.143815044 | 0.02167963 | 0.063498392 |
| Pecam1   | 1   | 69.23076923 | 50.72463768 | -18.50613155 | 0.02170868 | 0.063570786 |
| Mir5123  | 1   | 26.44628099 | 15.86538462 | -10.58089638 | 0.02174172 | 0.063654825 |
| Suv420h2 | 26  | 2.407545188 | 1.310449998 | -1.097095191 | 0.02176437 | 0.063708426 |
| Epm2a    | 101 | 1.436912223 | 1.125592144 | -0.31132008  | 0.02177373 | 0.06372311  |
| Pla2g7   | 11  | 5.437393392 | 4.16817951  | -1.269213881 | 0.02183884 | 0.063900925 |
| Bcar1    | 121 | 2.331594595 | 2.013630482 | -0.317964113 | 0.02184501 | 0.063906246 |
| Mei1     | 19  | 49.83623514 | 48.5669157  | -1.26931944  | 0.02187831 | 0.063978141 |
| Phkg2    | 6   | 4.60952202  | 3.369767136 | -1.239754885 | 0.02187446 | 0.063978141 |
| Sub1     | 65  | 1.470080996 | 1.373961841 | -0.096119155 | 0.02189155 | 0.064004108 |
| Rcc1     | 58  | 1.380648445 | 1.47037432  | 0.089725874  | 0.02198183 | 0.064255245 |
| Elmo1    | 63  | 1.203832712 | 1.371650577 | 0.167817864  | 0.02198711 | 0.064257875 |
| Tbc1d2b  | 45  | 0.790166549 | 1.241148626 | 0.450982077  | 0.02200507 | 0.064297558 |
| Hist1h3d | 6   | 2.557052302 | 4.106507372 | 1.549455069  | 0.02209145 | 0.06453712  |
| Icam5    | 21  | 2.201038513 | 1.819846494 | -0.38119202  | 0.02215518 | 0.064710406 |
| Uck1     | 14  | 0.896675689 | 1.262291748 | 0.365616059  | 0.02220892 | 0.064854462 |

|            |     |             |             |              |            |             |
|------------|-----|-------------|-------------|--------------|------------|-------------|
| Wasf3      | 49  | 60.89387913 | 58.42888946 | -2.464989676 | 0.02227223 | 0.065017293 |
| Rbm28      | 43  | 1.79839361  | 1.588078717 | -0.210314893 | 0.02227354 | 0.065017293 |
| Cox6c      | 31  | 1.569937434 | 1.251498688 | -0.318438746 | 0.02228597 | 0.065040637 |
| Stat2      | 9   | 0.717287466 | 2.321670257 | 1.60438279   | 0.02235436 | 0.065227264 |
| Mir149     | 7   | 62.11891498 | 65.02934673 | 2.910431746  | 0.02244277 | 0.065472207 |
| Nnt        | 29  | 1.578412608 | 1.459240303 | -0.119172305 | 0.02255215 | 0.065778225 |
| Gm11110    | 5   | 0.9919089   | 2.257295174 | 1.265386274  | 0.02255957 | 0.065786799 |
| Cipc       | 34  | 1.416370592 | 0.96562894  | -0.450741651 | 0.02256926 | 0.065801958 |
| Acer3      | 72  | 1.716562454 | 1.266761808 | -0.449800646 | 0.02262915 | 0.065963485 |
| 00012K07F  | 21  | 27.16523104 | 29.96428064 | 2.799049603  | 0.02264006 | 0.065982176 |
| Epor       | 3   | 35.53970213 | 27.23558434 | -8.304117794 | 0.02268931 | 0.066109317 |
| Tbc1d22bos | 2   | 98.69791667 | 96.70683518 | -1.991081483 | 0.0226972  | 0.066109317 |
| Gpn1       | 40  | 2.125362477 | 1.682611371 | -0.442751106 | 0.02269657 | 0.066109317 |
| Eepd1      | 28  | 1.259919584 | 0.887786247 | -0.372133336 | 0.02276447 | 0.066292094 |
| Skiv2l2    | 32  | 1.18908587  | 1.623685765 | 0.434599895  | 0.02279404 | 0.066365014 |
| Fam150b    | 30  | 39.24751565 | 38.40136436 | -0.846151298 | 0.02284415 | 0.066497737 |
| Mtap7d3    | 7   | 37.57912391 | 33.30927022 | -4.269853688 | 0.02285143 | 0.066505722 |
| Qsox1      | 32  | 3.045330267 | 2.379246178 | -0.666084089 | 0.02293113 | 0.066724439 |
| Nt5dc2     | 3   | 94.37465308 | 90.87681498 | -3.4978381   | 0.02293829 | 0.066732058 |
| Haus5      | 16  | 1.190816604 | 1.872284169 | 0.681467564  | 0.02297944 | 0.066832214 |
| Prickle1   | 91  | 1.25047623  | 1.035100336 | -0.215375894 | 0.02298183 | 0.066832214 |
| 030005L14F | 79  | 1.153026107 | 1.191476829 | 0.038450722  | 0.02299417 | 0.066854851 |
| Xrcc4      | 17  | 1.855077918 | 1.119046317 | -0.736031601 | 0.02302432 | 0.066929245 |
| Prkcq      | 26  | 46.00402807 | 42.73954781 | -3.264480263 | 0.02302976 | 0.066931795 |
| Slc25a23   | 42  | 1.906764059 | 1.536743764 | -0.370020295 | 0.02305904 | 0.067003647 |
| Rbpj       | 123 | 2.708571575 | 2.857305682 | 0.148734108  | 0.02307036 | 0.067023253 |
| Ap1m1      | 9   | 1.804488116 | 1.088832086 | -0.715656029 | 0.02315565 | 0.067257717 |
| Smg5       | 59  | 2.220004431 | 1.937065529 | -0.282938902 | 0.0231708  | 0.067288417 |
| 00029P11F  | 9   | 93.81166394 | 92.47267753 | -1.33898641  | 0.02324171 | 0.067480982 |
| Tm6sf2     | 2   | 8.981289778 | 4.612650322 | -4.368639456 | 0.0233117  | 0.067670801 |
| Gpr157     | 4   | 2.188843765 | 0.617283951 | -1.571559814 | 0.0234303  | 0.068001623 |
| Onecut2    | 55  | 2.888063788 | 2.361819602 | -0.526244186 | 0.02355096 | 0.068338297 |
| Abhd14a    | 12  | 1.111024693 | 2.108477678 | 0.997452985  | 0.02365731 | 0.068633324 |
| Zfp563     | 14  | 2.684445778 | 2.98803744  | 0.303591662  | 0.02366661 | 0.068646723 |

|            |     |             |             |              |            |             |
|------------|-----|-------------|-------------|--------------|------------|-------------|
| !10013021F | 8   | 15.73206174 | 11.82544569 | -3.90661605  | 0.02367363 | 0.068653533 |
| Tmem154    | 8   | 26.58881416 | 30.25675042 | 3.667936265  | 0.02368398 | 0.06866699  |
| Psmc5      | 21  | 1.790642558 | 1.395672242 | -0.394970316 | 0.02368763 | 0.06866699  |
| Hspd1      | 72  | 1.647178131 | 1.103996541 | -0.54318159  | 0.02370742 | 0.068703082 |
| !33421010F | 46  | 1.121296846 | 0.958684965 | -0.162611881 | 0.02370945 | 0.068703082 |
| Lpar1      | 41  | 1.468762391 | 0.977560457 | -0.491201935 | 0.02372476 | 0.068733878 |
| Pld1       | 39  | 1.301593276 | 0.906579688 | -0.395013588 | 0.0237369  | 0.068755487 |
| Plgrkt     | 9   | 5.415828094 | 3.92007443  | -1.495753663 | 0.02377806 | 0.068861106 |
| Pmm1       | 50  | 2.405421924 | 1.940825108 | -0.464596817 | 0.0237961  | 0.068899767 |
| Abhd14b    | 9   | 3.276046182 | 2.759501195 | -0.516544987 | 0.02388456 | 0.069142256 |
| Adarb1     | 82  | 1.581109746 | 1.026113435 | -0.554996311 | 0.02394859 | 0.069313925 |
| Rbm3os     | 30  | 15.62447543 | 18.40462558 | 2.780150156  | 0.02398123 | 0.06939471  |
| Platr10    | 3   | 92.83381278 | 89.1977692  | -3.636043579 | 0.02398741 | 0.069398914 |
| Gng5       | 105 | 1.494742784 | 1.253328984 | -0.241413799 | 0.02399243 | 0.069399761 |
| H1f0       | 123 | 1.871843479 | 1.607453179 | -0.2643903   | 0.02401796 | 0.069459895 |
| Slc37a2    | 10  | 1.923472457 | 1.314094549 | -0.609377908 | 0.024023   | 0.069460802 |
| Grhpr      | 15  | 2.905445813 | 1.783376479 | -1.122069335 | 0.02407335 | 0.069592646 |
| Rita1      | 38  | 1.645376109 | 1.237799941 | -0.407576167 | 0.02409211 | 0.069633185 |
| Phyhip     | 9   | 59.98008556 | 56.54547977 | -3.434605793 | 0.02415164 | 0.069791498 |
| Batf       | 3   | 46.92007797 | 37.98220827 | -8.937869705 | 0.02415847 | 0.069797476 |
| Fam109a    | 46  | 1.664018485 | 1.127389332 | -0.536629153 | 0.02419298 | 0.069883418 |
| Gabpb2     | 36  | 1.596294375 | 1.025573735 | -0.57072064  | 0.02422916 | 0.069974161 |
| Eid2b      | 36  | 5.260077911 | 3.110595929 | -2.149481982 | 0.02423899 | 0.069988759 |
| Fam167a    | 15  | 1.21048896  | 0.594983504 | -0.615505456 | 0.02428349 | 0.07010347  |
| Lix1l      | 30  | 1.840511353 | 1.387329397 | -0.453181957 | 0.02438011 | 0.070368568 |
| Alk        | 8   | 10.80019913 | 8.50284272  | -2.297356407 | 0.02439688 | 0.070403115 |
| Sugp2      | 12  | 1.126243269 | 0.59625316  | -0.529990108 | 0.02449385 | 0.070669043 |
| Josd1      | 73  | 1.482634589 | 1.201734571 | -0.280900018 | 0.02456487 | 0.07086002  |
| Fer        | 83  | 12.60679528 | 12.19939274 | -0.407402537 | 0.02460386 | 0.070958537 |
| Jam3       | 56  | 44.40286244 | 41.5982155  | -2.804646942 | 0.02468948 | 0.071191464 |
| Ctnnbp2    | 53  | 32.37201281 | 31.49324149 | -0.87877131  | 0.02469751 | 0.071200645 |
| Gtf2i      | 59  | 1.160918663 | 1.481297791 | 0.320379129  | 0.02471435 | 0.071235196 |
| Pdss1      | 49  | 0.968374888 | 1.159546535 | 0.191171647  | 0.02472655 | 0.071256356 |
| Polr2i     | 4   | 2.440511163 | 4.080091285 | 1.639580121  | 0.02474833 | 0.071301433 |

|            |     |             |             |              |            |             |
|------------|-----|-------------|-------------|--------------|------------|-------------|
| Dhodh      | 46  | 1.407800749 | 1.107460392 | -0.300340357 | 0.02475191 | 0.071301433 |
| Cd302      | 21  | 6.024597455 | 5.708568222 | -0.316029233 | 0.02476759 | 0.071318612 |
| Fbxo18     | 29  | 1.751256569 | 1.421257058 | -0.329999512 | 0.02476471 | 0.071318612 |
| Prss40     | 1   | 85.18518519 | 72.34042553 | -12.84475965 | 0.02477887 | 0.071337092 |
| Zfp93      | 1   | 1.877934272 | 5.813953488 | 3.936019216  | 0.02481452 | 0.071425696 |
| Gm5126     | 28  | 26.79014144 | 28.70386853 | 1.913727088  | 0.02482255 | 0.071434823 |
| Mycl       | 62  | 1.621449025 | 1.898574448 | 0.277125423  | 0.02483227 | 0.071448777 |
| Ssbp3      | 98  | 0.713414354 | 0.920011221 | 0.206596867  | 0.02487267 | 0.071550986 |
| Gpalpp1    | 33  | 1.196629538 | 1.560228301 | 0.363598763  | 0.02490995 | 0.071644174 |
| Xlr4b      | 1   | 68.55345912 | 79.31034483 | 10.75688571  | 0.02496858 | 0.07178466  |
| Kis2       | 3   | 42.85447192 | 52.9217853  | 10.06731338  | 0.02496682 | 0.07178466  |
| Gpr25      | 43  | 5.432086761 | 8.99445875  | 3.562371989  | 0.02497504 | 0.071789161 |
| Snord23    | 6   | 95.55218579 | 97.64058041 | 2.088394616  | 0.02509094 | 0.072108206 |
| Nphp1      | 24  | 1.677699134 | 1.022554699 | -0.655144436 | 0.02512663 | 0.072169768 |
| Fam72a     | 33  | 1.733723772 | 1.17777927  | -0.555944502 | 0.02512712 | 0.072169768 |
| Fam181a    | 19  | 44.12623774 | 47.89672679 | 3.77048905   | 0.02512597 | 0.072169768 |
| Slc16a1    | 113 | 1.336064886 | 1.359061196 | 0.022996309  | 0.02514549 | 0.072208413 |
| Tlk2       | 28  | 1.443923307 | 1.848367054 | 0.404443747  | 0.02516943 | 0.072263014 |
| Ube2k      | 64  | 1.677859992 | 1.362825854 | -0.315034138 | 0.02518781 | 0.072301619 |
| Cby1       | 23  | 1.533199762 | 1.288719086 | -0.244480676 | 0.02526673 | 0.072499815 |
| i32404H12F | 45  | 1.705225229 | 1.399795631 | -0.305429598 | 0.02526248 | 0.072499815 |
| Rgp1       | 35  | 1.206337252 | 1.281953263 | 0.07561601   | 0.02541342 | 0.072906461 |
| Derl3      | 6   | 19.90866841 | 15.4332583  | -4.475410112 | 0.0254259  | 0.072928014 |
| Kctd8      | 28  | 27.74340865 | 25.75256854 | -1.990840114 | 0.02543759 | 0.072947284 |
| Xkr8       | 9   | 2.391167232 | 3.004951594 | 0.613784362  | 0.02545455 | 0.072981648 |
| Nfkb2      | 73  | 1.767271425 | 1.468222411 | -0.299049014 | 0.02546408 | 0.072994721 |
| Srp9       | 51  | 1.762547103 | 1.235975238 | -0.526571865 | 0.02558471 | 0.073326169 |
| Plcg2      | 44  | 6.152786435 | 5.927410829 | -0.225375606 | 0.0256438  | 0.073481175 |
| Cwc22      | 16  | 1.718571426 | 0.909163864 | -0.809407561 | 0.02577221 | 0.073834713 |
| Sfr1       | 29  | 0.765955957 | 1.14406206  | 0.378106103  | 0.02581224 | 0.073934972 |
| Bpi        | 5   | 62.91905194 | 58.56137327 | -4.357678675 | 0.02587556 | 0.074101878 |
| Heg1       | 68  | 1.171539661 | 1.262069183 | 0.090529522  | 0.02588668 | 0.074119254 |
| Fam171b    | 34  | 2.153423016 | 1.277704374 | -0.875718642 | 0.0258941  | 0.074126018 |
| Iqsec1     | 22  | 8.244026037 | 8.008895408 | -0.235130629 | 0.02591244 | 0.074164059 |

|            |     |             |             |              |            |             |
|------------|-----|-------------|-------------|--------------|------------|-------------|
| Chaf1a     | 43  | 1.566640823 | 1.337035689 | -0.229605135 | 0.02593792 | 0.074215975 |
| Pramel1    | 19  | 83.37650909 | 81.84057165 | -1.535937441 | 0.02594069 | 0.074215975 |
| I33439K11F | 7   | 11.60266945 | 19.89390411 | 8.291234651  | 0.02597635 | 0.074274532 |
| Aurkaip1   | 8   | 1.474271403 | 3.421399752 | 1.947128349  | 0.02597534 | 0.074274532 |
| Prkra      | 36  | 2.022609157 | 1.642559072 | -0.380050085 | 0.02597004 | 0.074274532 |
| Wdyhv1     | 45  | 1.784700197 | 1.404986458 | -0.379713739 | 0.02600976 | 0.074355596 |
| Dnajc3     | 96  | 1.019570133 | 1.233424385 | 0.213854252  | 0.02605169 | 0.074460952 |
| Ghr        | 17  | 8.58087364  | 9.504715603 | 0.923841963  | 0.02607168 | 0.074503582 |
| Mob2       | 68  | 1.835430712 | 1.192396982 | -0.64303373  | 0.02608136 | 0.074516712 |
| Parp11     | 32  | 1.890846096 | 1.388279603 | -0.502566493 | 0.02610207 | 0.074546872 |
| Rbm44      | 7   | 94.25712537 | 91.98241105 | -2.274714328 | 0.02610079 | 0.074546872 |
| Ptprj      | 92  | 1.118874831 | 0.778576006 | -0.340298825 | 0.02611139 | 0.074558966 |
| Sash1      | 79  | 1.394774036 | 1.123712485 | -0.271061551 | 0.0262167  | 0.074845106 |
| Tmem57     | 145 | 1.336847999 | 1.174753244 | -0.162094755 | 0.0262775  | 0.075004078 |
| Il6st      | 103 | 1.437539127 | 1.514803943 | 0.077264816  | 0.0263316  | 0.075143899 |
| Pias1      | 49  | 1.78086314  | 1.942476917 | 0.161613777  | 0.02636458 | 0.075223393 |
| Crkl       | 50  | 0.936286521 | 1.285309035 | 0.349022515  | 0.02638926 | 0.075279167 |
| Mpc1       | 78  | 1.414443871 | 1.225464869 | -0.188979001 | 0.02645726 | 0.075458465 |
| Hmx3       | 103 | 28.68920371 | 29.16114174 | 0.471938032  | 0.02648721 | 0.075529211 |
| Nap1l5     | 17  | 85.01438054 | 86.43125207 | 1.416871526  | 0.02662078 | 0.075895342 |
| Tomm70a    | 58  | 1.463225782 | 1.173714179 | -0.289511603 | 0.026626   | 0.075895487 |
| Heatr5b    | 33  | 1.284279886 | 0.953968774 | -0.330311112 | 0.02668803 | 0.076057511 |
| Dnajc8     | 52  | 1.74839272  | 1.223940853 | -0.524451867 | 0.02675446 | 0.076232034 |
| I30006K11F | 33  | 2.991530157 | 2.186162034 | -0.805368123 | 0.02677457 | 0.076274503 |
| Emx2os     | 10  | 45.35960648 | 49.08816583 | 3.728559349  | 0.02678053 | 0.076276696 |
| Ciita      | 5   | 79.71484011 | 75.50527733 | -4.209562782 | 0.0267977  | 0.076310786 |
| Ncaph2     | 33  | 1.906890409 | 1.456746644 | -0.450143765 | 0.02686599 | 0.076490409 |
| Zdhhc9     | 11  | 7.329913033 | 5.917929743 | -1.41198329  | 0.02688465 | 0.076522868 |
| Dyrk2      | 153 | 1.442723612 | 1.264574453 | -0.178149159 | 0.02688782 | 0.076522868 |
| Lims1      | 77  | 1.309849986 | 0.992117852 | -0.317732134 | 0.0269743  | 0.076754088 |
| Cgrrf1     | 26  | 2.198399216 | 1.520562394 | -0.677836822 | 0.0270259  | 0.076886025 |
| Atn1       | 136 | 1.467234666 | 1.304444102 | -0.162790564 | 0.02703116 | 0.076886076 |
| Bahd1      | 150 | 1.583806492 | 1.263421415 | -0.320385076 | 0.02705534 | 0.076939941 |
| Mtap       | 24  | 1.370592496 | 1.887084344 | 0.516491848  | 0.02707706 | 0.076971868 |



|            |     |             |             |              |            |             |
|------------|-----|-------------|-------------|--------------|------------|-------------|
| Klhl25     | 40  | 1.97908216  | 1.347113878 | -0.631968281 | 0.02707306 | 0.076971868 |
| Acot9      | 19  | 18.48188535 | 16.59351052 | -1.888374829 | 0.02718108 | 0.077230934 |
| Rab10os    | 32  | 4.535737093 | 5.327489043 | 0.79175195   | 0.02718248 | 0.077230934 |
| Ube3a      | 38  | 0.812192236 | 0.43966569  | -0.372526546 | 0.02718398 | 0.077230934 |
| Limk1      | 79  | 4.282829116 | 3.184763815 | -1.098065301 | 0.02724566 | 0.077391163 |
| Spr        | 25  | 0.850956326 | 1.465948519 | 0.614992192  | 0.0272706  | 0.077447032 |
| Col14a1    | 2   | 10.51441195 | 15.73597181 | 5.221559858  | 0.02729794 | 0.077498152 |
| Alox15     | 10  | 36.73741245 | 34.14482732 | -2.592585123 | 0.02730445 | 0.077498152 |
| Abcg3      | 1   | 100         | 95.90163934 | -4.098360656 | 0.02730198 | 0.077498152 |
| Tinagl1    | 6   | 15.08129037 | 11.07004945 | -4.011240918 | 0.02739367 | 0.077736362 |
| Gm16982    | 4   | 97.54901961 | 93.67088608 | -3.878133532 | 0.02743003 | 0.077824501 |
| Rhoh       | 1   | 55.6561086  | 45.77464789 | -9.88146071  | 0.02744293 | 0.077830995 |
| Tha1       | 32  | 2.083859432 | 1.917444012 | -0.16641542  | 0.02743874 | 0.077830995 |
| Csnk1e     | 86  | 1.553372084 | 1.23854917  | -0.314822915 | 0.02749818 | 0.077968927 |
| Asb13      | 29  | 2.178426708 | 2.416175499 | 0.237748791  | 0.02750219 | 0.077968927 |
| Acpt       | 8   | 96.91203863 | 95.73781366 | -1.174224978 | 0.0275089  | 0.077972888 |
| Gm6213     | 2   | 35.50373768 | 45.52845528 | 10.0247176   | 0.0275263  | 0.07800714  |
| Serpini1   | 7   | 2.372450191 | 4.092471377 | 1.720021187  | 0.02756651 | 0.078106008 |
| Cdh13      | 6   | 47.6342519  | 50.65341348 | 3.01916158   | 0.02759382 | 0.078168297 |
| Rab11fip1  | 46  | 1.591280147 | 1.133110409 | -0.458169738 | 0.02768206 | 0.07840311  |
| St3gal4    | 14  | 1.62037944  | 0.614254874 | -1.006124565 | 0.02774615 | 0.078569476 |
| Gpr27      | 179 | 14.80381622 | 15.14357373 | 0.339757508  | 0.02782475 | 0.078776833 |
| Mrpl37     | 42  | 1.407940683 | 1.278901636 | -0.129039048 | 0.02784884 | 0.078814644 |
| Il15ra     | 35  | 2.655717944 | 1.94238907  | -0.713328874 | 0.02784759 | 0.078814644 |
| L10059E24F | 48  | 1.375122272 | 0.956888502 | -0.41823377  | 0.0279004  | 0.078945329 |
| Ap4m1      | 7   | 0.876449753 | 2.018543897 | 1.142094144  | 0.02792007 | 0.078985753 |
| Ntsr1      | 20  | 25.79836942 | 29.35978152 | 3.561412108  | 0.02793423 | 0.078995342 |
| Klhl7      | 19  | 1.402302449 | 0.995133349 | -0.4071691   | 0.02793384 | 0.078995342 |
| Il4ra      | 12  | 1.959177857 | 1.204401525 | -0.754776332 | 0.02802431 | 0.079219547 |
| Acot1      | 1   | 55.9602649  | 64.26666667 | 8.306401766  | 0.02802331 | 0.079219547 |
| Arl14      | 1   | 41.86046512 | 26.53061224 | -15.32985287 | 0.02803678 | 0.079239534 |
| Csnk1g3    | 67  | 1.222984671 | 1.237002053 | 0.014017382  | 0.02806209 | 0.079295795 |
| Mir6970    | 5   | 93.54835068 | 95.7323823  | 2.184031615  | 0.02811228 | 0.079422334 |
| Tmem25     | 48  | 4.830727687 | 4.180966724 | -0.649760963 | 0.02815624 | 0.079531223 |

|            |     |             |             |              |            |             |
|------------|-----|-------------|-------------|--------------|------------|-------------|
| Mrpl1      | 8   | 0.681344628 | 1.679234448 | 0.99788982   | 0.02818044 | 0.079584259 |
| Hist1h2ba  | 3   | 98.01561378 | 96.29974007 | -1.715873712 | 0.0282315  | 0.079713115 |
| Gzma       | 3   | 81.11111111 | 71.14427861 | -9.966832504 | 0.02826618 | 0.079795666 |
| Cnot11     | 58  | 1.00832656  | 1.167263304 | 0.158936744  | 0.02831247 | 0.079895384 |
| Slc4a4     | 91  | 2.028800991 | 1.604123217 | -0.424677774 | 0.02831783 | 0.079895384 |
| Kiz        | 7   | 2.06321448  | 1.331296377 | -0.731918102 | 0.02831141 | 0.079895384 |
| Smarca5    | 31  | 5.945717263 | 6.422800867 | 0.477083604  | 0.02843078 | 0.080198619 |
| Pde4dip    | 27  | 4.329910366 | 3.96284     | -0.367070366 | 0.02845092 | 0.080240016 |
| H2afy2     | 66  | 15.52053115 | 16.51364718 | 0.993116029  | 0.02849843 | 0.080358568 |
| 110021B22F | 37  | 1.57222695  | 1.26815972  | -0.30406723  | 0.02854157 | 0.080456836 |
| Fam134a    | 50  | 1.451218965 | 0.846891072 | -0.604327893 | 0.02854425 | 0.080456836 |
| Etaa1      | 38  | 1.345194374 | 1.609518303 | 0.264323929  | 0.02859584 | 0.080586774 |
| Ctu1       | 11  | 42.81091732 | 44.94279509 | 2.131877769  | 0.0286055  | 0.080595277 |
| Cars2      | 48  | 1.214315408 | 1.420251356 | 0.205935948  | 0.02860984 | 0.080595277 |
| Cdip1      | 21  | 0.991119969 | 0.675004708 | -0.316115261 | 0.02865531 | 0.080679317 |
| Rab4b      | 19  | 2.054299144 | 1.273428245 | -0.780870899 | 0.02865617 | 0.080679317 |
| Mcm2       | 20  | 2.747334615 | 2.031189475 | -0.71614514  | 0.02864916 | 0.080679317 |
| Slc25a19   | 3   | 3.842215133 | 0.83585423  | -3.006360903 | 0.02871599 | 0.080832231 |
| Sirt1      | 131 | 1.500368017 | 0.968999014 | -0.531369003 | 0.02876002 | 0.080925137 |
| Nedd4l     | 90  | 1.438350281 | 1.611811741 | 0.17346146   | 0.02875828 | 0.080925137 |
| Cdx4       | 6   | 64.91865968 | 70.88778632 | 5.969126634  | 0.02880201 | 0.08102774  |
| Slc18b1    | 20  | 1.807609382 | 1.298199339 | -0.509410042 | 0.02881073 | 0.081036734 |
| Taf10      | 44  | 1.103488604 | 1.009180716 | -0.094307888 | 0.02881651 | 0.081037453 |
| Sh2b1      | 24  | 1.247221373 | 1.741302966 | 0.494081593  | 0.02886306 | 0.081142716 |
| Abca4      | 8   | 78.0694583  | 72.71743329 | -5.352025009 | 0.028865   | 0.081142716 |
| Fbxl13     | 12  | 2.026818216 | 3.898356353 | 1.871538137  | 0.0288838  | 0.081180026 |
| Chrna3     | 16  | 33.08034523 | 36.32864939 | 3.248304161  | 0.0289058  | 0.081226289 |
| Rala       | 82  | 0.907727578 | 1.059108083 | 0.151380505  | 0.02892664 | 0.081269306 |
| Commd9     | 5   | 0.666215301 | 2.654953289 | 1.988737987  | 0.02906773 | 0.081650062 |
| Wdr34      | 19  | 11.9258918  | 9.718761896 | -2.207129905 | 0.02913504 | 0.08180781  |
| Nelfe      | 60  | 0.989669012 | 1.142447795 | 0.152778783  | 0.02913324 | 0.08180781  |
| Slc1a1     | 47  | 8.927109822 | 10.06030097 | 1.133191152  | 0.02914781 | 0.081827997 |
| Wnk4       | 30  | 2.845718609 | 2.333765959 | -0.51195265  | 0.02918322 | 0.08191174  |
| Acer2      | 21  | 5.751169406 | 4.069460057 | -1.681709348 | 0.02923685 | 0.082015209 |

|          |     |             |             |              |            |             |
|----------|-----|-------------|-------------|--------------|------------|-------------|
| Gpr101   | 9   | 47.53019663 | 51.28600108 | 3.755804445  | 0.029233   | 0.082015209 |
| Sema4c   | 129 | 1.4855088   | 1.604160891 | 0.118652092  | 0.02922741 | 0.082015209 |
| Plod3    | 64  | 1.56644236  | 1.166903676 | -0.399538684 | 0.02925168 | 0.082041119 |
| Pcm1     | 28  | 1.082208165 | 0.664556529 | -0.417651636 | 0.02930071 | 0.082162921 |
| Trim45   | 41  | 1.681499583 | 1.378553081 | -0.302946503 | 0.02937813 | 0.082364288 |
| Arrdc5   | 3   | 95.73117995 | 98.72286079 | 2.991680839  | 0.02942459 | 0.082478786 |
| Spag1    | 9   | 1.080605383 | 0.116346713 | -0.96425867  | 0.02943776 | 0.082499929 |
| Nfe2l1   | 45  | 4.23367818  | 3.658574724 | -0.575103456 | 0.02946102 | 0.082549352 |
| Pdlim5   | 82  | 1.54275617  | 1.682307539 | 0.139551369  | 0.02958732 | 0.082887427 |
| Zfp276   | 57  | 0.988871591 | 1.351391339 | 0.362519748  | 0.02964924 | 0.083045031 |
| Syne4    | 9   | 87.74647946 | 84.91039212 | -2.836087347 | 0.02966749 | 0.083080292 |
| BC022687 | 35  | 5.050452125 | 3.689770819 | -1.360681306 | 0.02967953 | 0.083098166 |
| Ctgf     | 12  | 2.472779695 | 1.082395689 | -1.390384006 | 0.02968707 | 0.083103394 |
| Tspan18  | 82  | 3.173327834 | 2.730008586 | -0.443319248 | 0.02987962 | 0.083610523 |
| Mir25    | 6   | 52.25940711 | 48.82780775 | -3.43159936  | 0.0298791  | 0.083610523 |
| Rnf185   | 8   | 17.31040992 | 13.81247224 | -3.497937683 | 0.02993585 | 0.083751904 |
| Oxa1l    | 20  | 1.848878827 | 0.902915676 | -0.94596315  | 0.02995035 | 0.083776488 |
| Ttc38    | 18  | 5.598591729 | 4.75184444  | -0.846747289 | 0.0299746  | 0.083827171 |
| Col27a1  | 65  | 1.794663828 | 1.28367593  | -0.510987898 | 0.0299799  | 0.083827171 |
| Mir3103  | 1   | 78.53881279 | 70.06802721 | -8.470785575 | 0.03000982 | 0.083894852 |
| Snrpg    | 5   | 3.446461397 | 1.780101752 | -1.666359644 | 0.03005574 | 0.084007237 |
| Dclk2    | 65  | 8.42025784  | 8.142906772 | -0.277351068 | 0.03010056 | 0.084116488 |
| H2-Q1    | 40  | 21.47370419 | 21.38302446 | -0.090679728 | 0.03011535 | 0.084141777 |
| Chac1    | 18  | 4.397048851 | 2.774107038 | -1.622941813 | 0.03012573 | 0.084154763 |
| Plxdc2   | 25  | 23.97817837 | 22.03490078 | -1.943277594 | 0.03014504 | 0.084192664 |
| Cep131   | 70  | 2.062462759 | 1.474070375 | -0.588392383 | 0.03016826 | 0.084241506 |
| Fat4     | 73  | 36.80393237 | 37.97419081 | 1.170258437  | 0.0302204  | 0.084371038 |
| Vps36    | 42  | 1.047070758 | 1.343448216 | 0.296377458  | 0.03024734 | 0.084430185 |
| Chd3     | 22  | 1.194812193 | 0.73647651  | -0.458335683 | 0.03038577 | 0.084800467 |
| Supt7l   | 1   | 5.154639175 | 10.90909091 | 5.754451734  | 0.03042948 | 0.0849063   |
| Slc35a3  | 62  | 1.139227295 | 1.071244543 | -0.067982752 | 0.03044039 | 0.084920596 |
| Mir5134  | 3   | 97.03407344 | 98.58438457 | 1.550311134  | 0.03046073 | 0.08496118  |
| Nov      | 19  | 23.82190764 | 27.72357094 | 3.901663293  | 0.03047601 | 0.08498763  |
| Mllt10   | 64  | 1.299946279 | 1.529639423 | 0.229693144  | 0.03052095 | 0.085096789 |

|            |     |             |             |              |            |             |
|------------|-----|-------------|-------------|--------------|------------|-------------|
| Zfpm1      | 115 | 1.034431876 | 0.881198582 | -0.153233294 | 0.03058185 | 0.085250399 |
| Cln8       | 7   | 3.191701156 | 2.264721794 | -0.926979362 | 0.03061594 | 0.085329225 |
| Tcaim      | 23  | 0.888144412 | 1.424991763 | 0.536847351  | 0.03068705 | 0.085511149 |
| 00092M07f  | 1   | 98.96907216 | 96.81372549 | -2.155346675 | 0.03070187 | 0.085536213 |
| Atp5l      | 23  | 0.799431065 | 1.826742922 | 1.027311857  | 0.03071872 | 0.085566906 |
| Syt8       | 2   | 47.00876306 | 38.45500572 | -8.553757344 | 0.03072558 | 0.085569791 |
| Nipbl      | 104 | 1.495130776 | 1.17917343  | -0.315957347 | 0.03076911 | 0.085674739 |
| Dph6       | 21  | 0.728927822 | 0.996227876 | 0.267300054  | 0.03084577 | 0.085871906 |
| Gm5129     | 42  | 1.713033295 | 1.194782901 | -0.518250394 | 0.03088799 | 0.085973138 |
| Rnaseh2b   | 32  | 1.693076196 | 1.202503965 | -0.490572231 | 0.03091966 | 0.086044953 |
| Mir6896    | 3   | 71.87106727 | 79.09421358 | 7.223146309  | 0.03093264 | 0.086048444 |
| Alyref2    | 27  | 1.731952464 | 1.354069896 | -0.377882568 | 0.0309302  | 0.086048444 |
| Mir210     | 33  | 6.782133182 | 5.742575419 | -1.039557763 | 0.0309728  | 0.086143839 |
| Mir7036    | 1   | 100         | 96.22641509 | -3.773584906 | 0.03103211 | 0.086290669 |
| Faf2       | 12  | 1.434729948 | 2.505042833 | 1.070312885  | 0.03103736 | 0.086290669 |
| Gpr137b-ps | 11  | 1.747810839 | 1.054702633 | -0.693108206 | 0.03115431 | 0.086599427 |
| Rsph6a     | 6   | 73.22185061 | 77.70317502 | 4.48132441   | 0.03126604 | 0.086893539 |
| Nudt3      | 135 | 1.462851325 | 1.124252889 | -0.338598437 | 0.03136009 | 0.087138408 |
| Mir7685    | 3   | 87.61044453 | 83.21223802 | -4.398206509 | 0.03140034 | 0.087200708 |
| Jmy        | 77  | 1.235563272 | 1.501235056 | 0.265671784  | 0.03139521 | 0.087200708 |
| Minos1     | 9   | 2.447546118 | 2.286016981 | -0.161529137 | 0.03138973 | 0.087200708 |
| Myo1a      | 2   | 90.48566376 | 85.18046859 | -5.305195176 | 0.03140699 | 0.087202689 |
| Slc24a1    | 4   | 94.96014031 | 92.14196468 | -2.818175624 | 0.03143212 | 0.087222945 |
| Tef        | 41  | 1.03393606  | 1.626273966 | 0.592337906  | 0.03142876 | 0.087222945 |
| Amt        | 1   | 87.17948718 | 74.19354839 | -12.98593879 | 0.03142497 | 0.087222945 |
| 030625G05F | 2   | 60.14908257 | 53.21247587 | -6.9366067   | 0.03146796 | 0.087301501 |
| Cnot4      | 36  | 2.291868864 | 1.391662364 | -0.9002065   | 0.03147233 | 0.087301501 |
| 030429K09F | 42  | 2.114047293 | 1.402548415 | -0.711498879 | 0.03149734 | 0.087354369 |
| Ttc14      | 95  | 14.69116328 | 14.39117333 | -0.299989946 | 0.03153644 | 0.087446291 |
| Tirap      | 33  | 1.64068977  | 1.064326608 | -0.576363162 | 0.03155394 | 0.087478267 |
| Scarna2    | 13  | 1.113635467 | 0.619269512 | -0.494365956 | 0.03173487 | 0.087963268 |
| Nwd1       | 3   | 6.436731956 | 4.606393799 | -1.830338157 | 0.03179226 | 0.088105683 |
| Rgs17      | 28  | 5.163398596 | 4.496503799 | -0.666894798 | 0.03180115 | 0.088113697 |
| Mir124a-3  | 139 | 9.231572332 | 10.42931953 | 1.197747196  | 0.03191705 | 0.088418109 |

|          |     |             |             |              |            |             |
|----------|-----|-------------|-------------|--------------|------------|-------------|
| Pafah1b3 | 26  | 1.630553103 | 0.83103289  | -0.799520213 | 0.03196494 | 0.08853408  |
| Rpa3     | 15  | 1.353901268 | 1.58392764  | 0.230026372  | 0.03203551 | 0.088712787 |
| Maml3    | 19  | 1.392322821 | 1.277074738 | -0.115248083 | 0.03205771 | 0.088757511 |
| Dchs1    | 51  | 38.89498223 | 40.45390713 | 1.558924905  | 0.03207252 | 0.08878176  |
| Zdhhc7   | 92  | 1.192842202 | 1.399501297 | 0.206659095  | 0.03209472 | 0.088826471 |
| Nr3c2    | 36  | 2.457732301 | 1.991574191 | -0.46615811  | 0.03212839 | 0.088902871 |
| Xlr5c    | 1   | 92.57142857 | 85.9030837  | -6.668344871 | 0.0321791  | 0.089026424 |
| Mcoln1   | 15  | 1.100757038 | 0.530603367 | -0.570153671 | 0.03221772 | 0.089116465 |
| Fstl5    | 16  | 36.82445643 | 36.29687742 | -0.527579012 | 0.03222399 | 0.089117017 |
| Fbxo3    | 34  | 1.858840693 | 1.468591205 | -0.390249488 | 0.03232969 | 0.089392153 |
| Eif2ak4  | 21  | 1.598658339 | 2.00058441  | 0.40192607   | 0.03233566 | 0.089392153 |
| 9-Mar    | 86  | 1.636085884 | 1.364299848 | -0.271786037 | 0.03241273 | 0.089588309 |
| Coro2a   | 69  | 1.458835466 | 1.147011111 | -0.311824355 | 0.03243175 | 0.089624    |
| H6pd     | 56  | 5.558897199 | 6.711455262 | 1.152558062  | 0.03243897 | 0.089627094 |
| Mbtps2   | 29  | 21.274132   | 19.68508382 | -1.58904818  | 0.03247833 | 0.08971893  |
| Zbtb24   | 27  | 3.282754755 | 2.240241095 | -1.04251366  | 0.03252664 | 0.089835469 |
| Parva    | 7   | 3.54540382  | 2.170408692 | -1.374995128 | 0.03253333 | 0.089837054 |
| Ranbp17  | 110 | 55.5726396  | 56.67316515 | 1.100525553  | 0.03257228 | 0.089927672 |
| Stx2     | 28  | 1.560940699 | 1.396117786 | -0.164822913 | 0.03258616 | 0.089932152 |
| Cxx1c    | 14  | 28.963029   | 27.13537025 | -1.827658748 | 0.03258463 | 0.089932152 |
| Kmt2c    | 190 | 1.240091026 | 1.017699568 | -0.222391459 | 0.03260436 | 0.089965477 |
| Mycn     | 30  | 3.671547415 | 3.177404951 | -0.494142463 | 0.03265516 | 0.090073721 |
| Arid5a   | 17  | 0.593094701 | 0.859733757 | 0.266639056  | 0.03265587 | 0.090073721 |
| Fam102a  | 87  | 1.459597872 | 1.282464074 | -0.177133798 | 0.0326684  | 0.090091368 |
| Gdf11    | 88  | 1.797651653 | 1.472637009 | -0.325014644 | 0.0326819  | 0.090111647 |
| Macrod2  | 74  | 1.694169131 | 1.461432598 | -0.232736533 | 0.03269555 | 0.090132357 |
| Hn1l     | 16  | 1.398486297 | 1.940610553 | 0.542124257  | 0.03274193 | 0.090243262 |
| Dpyd     | 10  | 12.18967511 | 11.80819615 | -0.381478969 | 0.03275468 | 0.090261454 |
| Gsg2     | 74  | 1.126753586 | 1.289466317 | 0.162712731  | 0.03282058 | 0.090426072 |
| Ppap2b   | 30  | 1.566768057 | 1.297322104 | -0.269445953 | 0.03285845 | 0.090513399 |
| Cdyl     | 166 | 1.942593883 | 1.695319287 | -0.247274597 | 0.03293968 | 0.090720142 |
| Fam209   | 1   | 92.11618257 | 86.07594937 | -6.040233206 | 0.03304479 | 0.090992548 |
| Rela     | 109 | 1.899414544 | 1.31358202  | -0.585832524 | 0.03305748 | 0.091008504 |
| Tex19.1  | 11  | 95.28812529 | 92.88807239 | -2.400052902 | 0.03306299 | 0.091008504 |

|            |     |             |             |              |            |             |
|------------|-----|-------------|-------------|--------------|------------|-------------|
| Gnaz       | 69  | 1.93282844  | 2.436454239 | 0.503625799  | 0.03308117 | 0.091041475 |
| Hist2h3c1  | 7   | 3.438371602 | 2.745144834 | -0.693226768 | 0.03311489 | 0.091117165 |
| Armc5      | 43  | 5.731793628 | 7.407741707 | 1.675948078  | 0.03315634 | 0.091214124 |
| Aaed1      | 9   | 0.113378685 | 0.906148795 | 0.79277011   | 0.03325859 | 0.091478258 |
| Bhmt2      | 1   | 91.52542373 | 78.88888889 | -12.63653484 | 0.03331142 | 0.091606407 |
| Sema3e     | 14  | 4.785087699 | 3.693775101 | -1.091312598 | 0.03343066 | 0.091917076 |
| Rnf207     | 14  | 6.419522282 | 4.794971605 | -1.624550678 | 0.03344026 | 0.091926258 |
| C1galt1    | 117 | 1.101317561 | 1.128734804 | 0.027417242  | 0.03350572 | 0.092088947 |
| Galnt3     | 97  | 1.827747263 | 1.495115548 | -0.332631716 | 0.0335419  | 0.092171127 |
| Pcdh17     | 2   | 14.3442623  | 7.916666667 | -6.427595628 | 0.03360935 | 0.092339195 |
| Dcun1d4    | 49  | 1.601056179 | 1.273458306 | -0.327597873 | 0.03372477 | 0.092621613 |
| Zfp623     | 56  | 1.298532232 | 1.034087746 | -0.264444486 | 0.03372259 | 0.092621613 |
| Pklr       | 8   | 16.25409227 | 20.63778429 | 4.383692019  | 0.03376039 | 0.092702078 |
| Brat1      | 14  | 2.371732559 | 1.22553633  | -1.14619623  | 0.03378475 | 0.09275161  |
| Eef1d      | 74  | 1.198128657 | 1.339390728 | 0.141262071  | 0.0338748  | 0.092981452 |
| Pcdh12     | 1   | 83.87096774 | 74.44444444 | -9.426523297 | 0.03392742 | 0.093108458 |
| Sec22a     | 45  | 1.380240096 | 1.04356774  | -0.336672356 | 0.03394673 | 0.093144028 |
| Vrtn       | 10  | 54.40054921 | 51.85617128 | -2.544377931 | 0.03402086 | 0.093312549 |
| Heatr1     | 12  | 1.841835378 | 0.734987928 | -1.10684745  | 0.03401966 | 0.093312549 |
| Metap1     | 78  | 1.502748141 | 1.110689585 | -0.392058556 | 0.03404911 | 0.093355137 |
| Pradc1     | 81  | 0.972955804 | 1.272653393 | 0.299697589  | 0.03404302 | 0.093355137 |
| Magee1     | 6   | 25.95839618 | 21.47092542 | -4.487470756 | 0.03409658 | 0.09345058  |
| Dgke       | 49  | 1.159700711 | 1.346660251 | 0.18695954   | 0.03409913 | 0.09345058  |
| Dcbld2     | 93  | 1.130217686 | 1.447271169 | 0.317053482  | 0.03410303 | 0.09345058  |
| Map1lc3b   | 33  | 1.65097958  | 1.359415055 | -0.291564525 | 0.03412021 | 0.093480207 |
| Zfp324     | 13  | 1.213447761 | 1.886001805 | 0.672554043  | 0.03415542 | 0.093559209 |
| Phka1      | 36  | 16.09446335 | 14.09509892 | -1.999364434 | 0.03420714 | 0.093650711 |
| Tfap2a     | 55  | 33.2954958  | 34.21348609 | 0.917990294  | 0.03420797 | 0.093650711 |
| Tcirg1     | 31  | 1.656989594 | 1.278833024 | -0.378156571 | 0.03420417 | 0.093650711 |
| Cnn2       | 52  | 1.353807242 | 1.597469782 | 0.24366254   | 0.03422539 | 0.093663443 |
| 330050I16R | 70  | 1.055080791 | 0.963825888 | -0.091254903 | 0.03422112 | 0.093663443 |
| Ppm1j      | 51  | 3.546423875 | 2.695892768 | -0.850531107 | 0.03425213 | 0.093719135 |
| Pgr        | 2   | 39.36170213 | 33.38235294 | -5.979349186 | 0.03439019 | 0.094079354 |
| Cbx4       | 109 | 1.665996643 | 1.369473195 | -0.296523448 | 0.03441937 | 0.094141629 |

|          |     |             |             |              |            |             |
|----------|-----|-------------|-------------|--------------|------------|-------------|
| Dnah7a   | 20  | 73.60310147 | 75.65579956 | 2.052698085  | 0.03445371 | 0.094217985 |
| Onecut3  | 43  | 2.017100012 | 1.806587637 | -0.210512375 | 0.03446869 | 0.094241383 |
| Zfp326   | 58  | 1.552047978 | 1.283752221 | -0.268295757 | 0.03453502 | 0.094405166 |
| Hnrnpa0  | 153 | 1.157496164 | 0.944608669 | -0.212887495 | 0.03458247 | 0.094517258 |
| 2-Sep    | 23  | 1.485657689 | 1.133573767 | -0.352083922 | 0.03459094 | 0.094522807 |
| Figla    | 2   | 95.36934185 | 97.6744186  | 2.305076755  | 0.03461791 | 0.094578899 |
| Scnn1a   | 3   | 52.33897894 | 46.96742308 | -5.371555853 | 0.03464968 | 0.094648058 |
| Cxx1a    | 3   | 27.87736311 | 20.72169312 | -7.155669989 | 0.03469103 | 0.094743369 |
| Kif24    | 11  | 0.68864757  | 1.165686758 | 0.477039188  | 0.03473771 | 0.094853219 |
| Rft1     | 20  | 1.716761934 | 1.48671797  | -0.230043964 | 0.0348778  | 0.09521801  |
| Lrrc73   | 55  | 4.091234463 | 3.575135542 | -0.516098921 | 0.03495331 | 0.095406404 |
| Exosc1   | 42  | 1.493160779 | 1.22257505  | -0.270585729 | 0.03498184 | 0.09546653  |
| Klrg2    | 54  | 1.536729951 | 1.190790043 | -0.345939908 | 0.03502475 | 0.095565844 |
| Zdhhc5   | 40  | 1.363391513 | 0.765975484 | -0.597416029 | 0.03503847 | 0.095567742 |
| Pde12    | 23  | 1.090700847 | 1.764292055 | 0.673591208  | 0.03503522 | 0.095567742 |
| Faap24   | 5   | 0.939982348 | 2.071926303 | 1.131943955  | 0.03504585 | 0.095570111 |
| Fkbp10   | 19  | 4.011856553 | 5.233025058 | 1.221168505  | 0.03520095 | 0.095975227 |
| Gm10658  | 3   | 5.055296489 | 3.458290831 | -1.597005658 | 0.03525396 | 0.096101914 |
| Gdpd2    | 5   | 40.13944343 | 33.11667634 | -7.022767094 | 0.03526308 | 0.096108912 |
| Mir7046  | 4   | 94.95015488 | 92.95619937 | -1.993955506 | 0.03532595 | 0.096262401 |
| Srek1ip1 | 7   | 1.137602638 | 0.536616162 | -0.600986476 | 0.03533671 | 0.096273827 |
| B4galt2  | 73  | 2.127672015 | 1.726495126 | -0.401176889 | 0.03536763 | 0.096340185 |
| Hibadh   | 34  | 0.767573098 | 1.356568981 | 0.588995883  | 0.03541938 | 0.096463235 |
| Qrfp     | 3   | 14.97560976 | 9.68707483  | -5.288534926 | 0.03553753 | 0.096767069 |
| Limd1    | 65  | 2.837038892 | 2.1839037   | -0.653135191 | 0.03554536 | 0.096770433 |
| Hid1     | 34  | 1.838611026 | 2.125806746 | 0.28719572   | 0.03557442 | 0.096831584 |
| Stx16    | 25  | 2.049996356 | 1.647308063 | -0.402688293 | 0.03567537 | 0.09708834  |
| Amz2     | 10  | 1.481153953 | 2.308241312 | 0.827087359  | 0.03584689 | 0.097537049 |
| Smarcd3  | 46  | 1.68989213  | 1.322317579 | -0.367574551 | 0.03587931 | 0.09760715  |
| Scrn2    | 13  | 3.058045382 | 2.266626666 | -0.791418717 | 0.03600252 | 0.097924197 |
| Ptpn4    | 24  | 1.182069012 | 1.182904941 | 0.000835929  | 0.03605154 | 0.098039345 |
| Caap1    | 63  | 0.705803427 | 1.076039841 | 0.370236414  | 0.03616409 | 0.098327183 |
| Cfl2     | 90  | 1.281753554 | 1.155083057 | -0.126670496 | 0.03618102 | 0.098355    |
| Cnih4    | 42  | 1.160087933 | 0.83991035  | -0.320177583 | 0.03619479 | 0.098374207 |

|            |     |             |             |              |            |             |
|------------|-----|-------------|-------------|--------------|------------|-------------|
| Pla2g12a   | 70  | 0.968795771 | 1.206514865 | 0.237719094  | 0.03626105 | 0.098536049 |
| Park7      | 21  | 1.415046398 | 0.911111219 | -0.503935179 | 0.03632915 | 0.098702831 |
| Adgrl4     | 5   | 85.52380952 | 80.90962412 | -4.614185408 | 0.03639914 | 0.098874675 |
| 510008E11F | 7   | 2.076521216 | 1.049313793 | -1.027207424 | 0.03643256 | 0.098928815 |
| Pak4       | 51  | 2.158906766 | 1.923860151 | -0.235046615 | 0.03642993 | 0.098928815 |
| Aprt       | 27  | 1.846138073 | 1.225123874 | -0.621014199 | 0.03645427 | 0.098969478 |
| Ifi47      | 5   | 9.671503319 | 6.603088669 | -3.06841465  | 0.03651527 | 0.099105794 |
| Stard6     | 61  | 2.856779183 | 1.815578682 | -1.041200501 | 0.03651799 | 0.099105794 |
| Rnf20      | 13  | 2.059473726 | 1.179694971 | -0.879778755 | 0.03657077 | 0.099222495 |
| 700088E04F | 37  | 1.312353034 | 0.995864431 | -0.316488603 | 0.03657452 | 0.099222495 |
| Arhgap12   | 66  | 1.276132075 | 1.484716718 | 0.208584644  | 0.03661731 | 0.099320224 |
| Rps6ka4    | 61  | 1.309106027 | 1.338573665 | 0.029467639  | 0.03663714 | 0.099355642 |
| Gm20939    | 4   | 0.860297591 | 1.89341326  | 1.033115669  | 0.03667068 | 0.099428218 |
| Ctu2       | 79  | 1.231361089 | 1.261803828 | 0.030442739  | 0.03672616 | 0.099560254 |
| Adgra2     | 112 | 1.306242917 | 1.265953786 | -0.040289131 | 0.03686506 | 0.099918332 |
| B4gat1     | 43  | 0.942274158 | 1.211923996 | 0.269649837  | 0.03692253 | 0.100055621 |
| Chic1      | 2   | 20.76023392 | 14.63661552 | -6.123618402 | 0.03696414 | 0.100149875 |
| Slc22a8    | 1   | 66.9527897  | 57.57575758 | -9.377032124 | 0.03701222 | 0.10026164  |
| Atg7       | 12  | 2.093133495 | 2.793168026 | 0.70003453   | 0.03704233 | 0.100324694 |
| Rpl26      | 19  | 2.754330875 | 2.309943119 | -0.444387756 | 0.03713163 | 0.100547997 |
| Ppl        | 31  | 2.988914193 | 2.790673937 | -0.198240256 | 0.0371775  | 0.10065363  |
| Inadl      | 38  | 0.995992041 | 1.2271427   | 0.231150659  | 0.03719183 | 0.100673849 |
| Rnaseh2c   | 20  | 1.533197081 | 1.186260196 | -0.346936885 | 0.03723643 | 0.100775972 |
| Popdc2     | 9   | 84.46657557 | 88.20682373 | 3.740248159  | 0.0372623  | 0.100827389 |
| Nacc2      | 92  | 2.367001721 | 1.987499926 | -0.379501795 | 0.03729893 | 0.100907915 |
| Ndufab1    | 22  | 0.720508417 | 1.127400524 | 0.406892107  | 0.03732042 | 0.10094745  |
| Snord104   | 18  | 1.080047353 | 1.567473043 | 0.48742569   | 0.03735142 | 0.101012655 |
| .10017D15F | 8   | 53.3333295  | 51.33125531 | -2.002074186 | 0.03744871 | 0.101257116 |
| Thbs2      | 2   | 21.33463691 | 17.41998927 | -3.914647642 | 0.03750833 | 0.101399631 |
| Thnsl2     | 13  | 4.048283135 | 2.358644019 | -1.689639117 | 0.0375203  | 0.101413307 |
| Ccar1      | 58  | 1.248793998 | 1.045686604 | -0.203107394 | 0.03752972 | 0.101420102 |
| Tead3      | 80  | 4.330061008 | 3.591279057 | -0.738781952 | 0.037547   | 0.101448101 |
| Sesn3      | 30  | 1.237401451 | 1.615912794 | 0.378511343  | 0.03769108 | 0.101818647 |
| Srrm4      | 32  | 50.83291154 | 47.25799478 | -3.574916765 | 0.03773228 | 0.101911198 |



|            |     |             |             |              |            |             |
|------------|-----|-------------|-------------|--------------|------------|-------------|
| Tmem74b    | 52  | 5.832718925 | 7.441558933 | 1.608840008  | 0.03774105 | 0.10191611  |
| Dleu2      | 62  | 1.258641198 | 0.937717329 | -0.320923869 | 0.03781941 | 0.10210894  |
| Nup210l    | 8   | 91.67617344 | 90.1562943  | -1.519879136 | 0.03790712 | 0.102326918 |
| 510040J01R | 38  | 2.403454269 | 3.184068417 | 0.780614148  | 0.03792621 | 0.102359611 |
| 510042L04F | 2   | 10.66666667 | 21.34831461 | 10.68164794  | 0.03794736 | 0.102397862 |
| Mir7658    | 1   | 95.89041096 | 100         | 4.109589041  | 0.03801607 | 0.102564396 |
| Insr       | 39  | 1.454068097 | 1.015837036 | -0.438231061 | 0.03803053 | 0.102584568 |
| Ddx24      | 19  | 1.342613213 | 1.08085281  | -0.261760403 | 0.03803834 | 0.102586779 |
| L10082J24R | 17  | 31.83088186 | 28.58555414 | -3.245327715 | 0.03823449 | 0.10309681  |
| Lrrc24     | 47  | 6.816583126 | 6.789482475 | -0.027100651 | 0.03830493 | 0.103267777 |
| Wwc1       | 79  | 1.93000068  | 1.607337159 | -0.32266352  | 0.03840791 | 0.103526378 |
| Gm2061     | 55  | 31.58469592 | 32.14869925 | 0.564003337  | 0.0384636  | 0.103638412 |
| Cirbp      | 46  | 1.41383659  | 1.15141621  | -0.26242038  | 0.03846049 | 0.103638412 |
| Dcun1d1    | 111 | 1.02502238  | 1.025298578 | 0.000276198  | 0.03860904 | 0.104011209 |
| Rnf111     | 85  | 1.05145319  | 1.139116006 | 0.087662816  | 0.03869825 | 0.104232407 |
| Bax        | 42  | 1.878551957 | 1.469598313 | -0.408953644 | 0.03872748 | 0.104291995 |
| 510010K14F | 49  | 1.406600833 | 1.054889598 | -0.351711236 | 0.03873661 | 0.104297427 |
| Nudt8      | 52  | 1.907545583 | 1.705361334 | -0.202184249 | 0.03876069 | 0.10434311  |
| Gtse1      | 17  | 3.122798977 | 2.290452535 | -0.832346442 | 0.03888889 | 0.104649831 |
| Ppp2r3c    | 9   | 1.834406056 | 1.155840756 | -0.6785653   | 0.03888826 | 0.104649831 |
| Pitpnb     | 66  | 1.17397111  | 1.341618242 | 0.167647132  | 0.03891954 | 0.104713112 |
| Ptov1      | 36  | 1.112119298 | 0.583349901 | -0.528769397 | 0.03894147 | 0.1047529   |
| Scaf4      | 110 | 1.768100395 | 1.295468702 | -0.472631693 | 0.03896214 | 0.104789295 |
| Rbm22      | 34  | 1.236208677 | 1.825738288 | 0.58952961   | 0.03905436 | 0.105018078 |
| Hexim1     | 10  | 1.667679482 | 2.279422931 | 0.611743448  | 0.0390811  | 0.105070724 |
| Tmed5      | 40  | 1.1910632   | 0.673721928 | -0.517341272 | 0.03910516 | 0.105110274 |
| Map2k4     | 87  | 1.184430189 | 1.278473335 | 0.094043146  | 0.0391173  | 0.105110274 |
| Ano5       | 10  | 52.81860286 | 50.04351619 | -2.775086673 | 0.03911152 | 0.105110274 |
| Miat       | 20  | 21.09666281 | 23.95066712 | 2.854004309  | 0.03915692 | 0.105191625 |
| 331440E17F | 147 | 1.187531242 | 0.940410536 | -0.247120707 | 0.03916191 | 0.105191625 |
| Dram1      | 17  | 2.531053995 | 1.443251963 | -1.087802032 | 0.03920073 | 0.105276619 |
| Agap2      | 2   | 29.92915956 | 22.9261469  | -7.003012661 | 0.0392321  | 0.105341586 |
| Gpr89      | 27  | 1.931192711 | 1.314660453 | -0.616532258 | 0.0393066  | 0.10550414  |
| Igf2bp2    | 76  | 1.939618845 | 1.266683291 | -0.672935553 | 0.03930701 | 0.10550414  |

|            |     |             |             |              |            |             |
|------------|-----|-------------|-------------|--------------|------------|-------------|
| Lect2      | 2   | 36.66666667 | 28.29131653 | -8.37535014  | 0.03933658 | 0.105548824 |
| Sdccag3    | 59  | 1.026801907 | 1.234351097 | 0.20754919   | 0.03933805 | 0.105548824 |
| Hmgn2      | 46  | 4.212736859 | 6.000568858 | 1.787831999  | 0.03942634 | 0.105748694 |
| Cyp4b1-ps2 | 1   | 75.47169811 | 61.79775281 | -13.6739453  | 0.03942695 | 0.105748694 |
| Swap70     | 34  | 1.431108761 | 0.909245552 | -0.521863209 | 0.03949665 | 0.105916266 |
| Ldb1       | 126 | 1.230438189 | 1.347333343 | 0.116895154  | 0.03951588 | 0.10594849  |
| Tbc1d22a   | 51  | 1.329381117 | 1.045921232 | -0.283459886 | 0.03955853 | 0.106043466 |
| Med17      | 43  | 0.96235093  | 1.296772186 | 0.334421257  | 0.03964234 | 0.106229307 |
| Cdk5rap1   | 15  | 1.307486777 | 0.811387461 | -0.496099316 | 0.03963776 | 0.106229307 |
| Sos1       | 121 | 1.321066397 | 1.053872647 | -0.26719375  | 0.03966668 | 0.106275133 |
| Pnkd       | 55  | 2.1025637   | 1.411654728 | -0.690908972 | 0.03972809 | 0.106400802 |
| Txnrd3     | 73  | 1.533210759 | 1.308100591 | -0.225110169 | 0.03972783 | 0.106400802 |
| Mamdc2     | 5   | 4.469379461 | 3.884419298 | -0.584960163 | 0.03977906 | 0.106516958 |
| Kif11      | 29  | 1.367834335 | 1.162989344 | -0.204844991 | 0.03978598 | 0.106516958 |
| Sestd1     | 101 | 1.243551109 | 1.099166307 | -0.144384802 | 0.03986536 | 0.106710003 |
| Acsl6      | 48  | 9.746365914 | 9.764954941 | 0.018589027  | 0.0400517  | 0.107189241 |
| Nr2f6      | 158 | 1.278898077 | 1.110822794 | -0.168075283 | 0.04008248 | 0.107252065 |
| Rap2b      | 47  | 2.103440751 | 1.646630231 | -0.456810519 | 0.0402464  | 0.107671041 |
| Mir702     | 10  | 96.85164349 | 94.54987482 | -2.301768671 | 0.04027292 | 0.107722355 |
| P3h4       | 59  | 2.524516382 | 2.023238853 | -0.501277529 | 0.04028409 | 0.107732604 |
| Irf2bp2    | 170 | 0.936310052 | 0.976091922 | 0.039781869  | 0.04030776 | 0.107776262 |
| Tecr       | 9   | 1.499887239 | 0.631894481 | -0.867992758 | 0.04035942 | 0.107894712 |
| Phactr3    | 29  | 50.05666774 | 53.43488818 | 3.378220439  | 0.04040407 | 0.107994399 |
| Olf1033    | 7   | 40.35069745 | 35.65173944 | -4.698958015 | 0.04041549 | 0.108005269 |
| Psmd1      | 42  | 3.553311227 | 3.76469518  | 0.211383953  | 0.0404355  | 0.10803906  |
| Mtf2       | 34  | 0.885688546 | 1.236631867 | 0.35094332   | 0.04047528 | 0.108125663 |
| Ndufs2     | 22  | 0.994691762 | 1.810645903 | 0.815954141  | 0.04052042 | 0.10822654  |
| Snx27      | 63  | 1.625114265 | 1.433586801 | -0.191527464 | 0.04067234 | 0.108612548 |
| Gm20110    | 1   | 100         | 94.54545455 | -5.454545455 | 0.04072439 | 0.108731747 |
| Traf3      | 94  | 1.11068362  | 1.132185283 | 0.021501663  | 0.04075272 | 0.108787609 |
| Sp9        | 41  | 32.80204242 | 34.84685121 | 2.04480879   | 0.04085966 | 0.109053219 |
| Osbpl8     | 91  | 1.266928325 | 1.095755112 | -0.171173213 | 0.04088145 | 0.109091534 |
| Kctd2      | 71  | 1.478201926 | 1.605095647 | 0.126893721  | 0.04090056 | 0.109122688 |
| Tmed1      | 10  | 0.825710232 | 1.390382986 | 0.564672754  | 0.04095778 | 0.10925549  |

|           |     |             |             |              |            |             |
|-----------|-----|-------------|-------------|--------------|------------|-------------|
| Slc2a8    | 67  | 1.794461729 | 1.410826423 | -0.383635305 | 0.04112395 | 0.109658877 |
| Htr4      | 20  | 32.59986852 | 32.18950172 | -0.41036681  | 0.0411178  | 0.109658877 |
| Usp26     | 13  | 96.15898491 | 94.32514935 | -1.833835557 | 0.04115351 | 0.109717759 |
| Cltc      | 26  | 2.71560593  | 2.609218626 | -0.106387303 | 0.04116404 | 0.109725914 |
| Gm8773    | 11  | 17.0640625  | 14.71989686 | -2.344165635 | 0.04119433 | 0.109786692 |
| Acox3     | 32  | 1.798155117 | 1.340847681 | -0.457307436 | 0.04124924 | 0.109873167 |
| Myo1c     | 81  | 2.01288795  | 1.636951911 | -0.375936039 | 0.04124448 | 0.109873167 |
| Syna      | 3   | 44.87399686 | 39.66590302 | -5.20809384  | 0.04124814 | 0.109873167 |
| Aff4      | 134 | 1.183837542 | 0.856954704 | -0.326882838 | 0.04129219 | 0.109967625 |
| Scfd2     | 25  | 2.332527784 | 1.848550248 | -0.483977536 | 0.0413153  | 0.11000921  |
| Btbd7     | 109 | 1.144456884 | 1.196116482 | 0.051659598  | 0.04134914 | 0.110079325 |
| Fam76a    | 92  | 1.008787975 | 1.100748668 | 0.091960693  | 0.04139687 | 0.110175795 |
| Pex14     | 12  | 2.322249588 | 1.665231344 | -0.657018243 | 0.04140355 | 0.110175795 |
| Nr2c2ap   | 23  | 1.141494848 | 1.493810137 | 0.352315288  | 0.0414079  | 0.110175795 |
| Ubxn7     | 38  | 1.571645417 | 1.423755475 | -0.147889941 | 0.04142913 | 0.11018804  |
| Mycbp     | 78  | 1.296642343 | 1.085889981 | -0.210752362 | 0.04143503 | 0.11018804  |
| Dusp28    | 17  | 1.215255333 | 2.282999923 | 1.06774459   | 0.04142493 | 0.11018804  |
| 30028A08F | 6   | 3.332667542 | 2.067868948 | -1.264798594 | 0.04151987 | 0.110393658 |
| Mir6995   | 3   | 95.86206897 | 92.46498599 | -3.397082971 | 0.04165073 | 0.110721533 |
| Igtp      | 8   | 52.23820752 | 48.58821459 | -3.649992937 | 0.041789   | 0.11106896  |
| Snord32a  | 3   | 24.9382716  | 18.51404976 | -6.424221841 | 0.04190972 | 0.111349482 |
| Mir5121   | 3   | 24.9382716  | 18.51404976 | -6.424221841 | 0.04190972 | 0.111349482 |
| Prom1     | 18  | 39.56058853 | 39.97946317 | 0.418874642  | 0.04197839 | 0.111511744 |
| Gpr50     | 8   | 67.32236195 | 63.09774955 | -4.224612405 | 0.04200025 | 0.111549615 |
| Cep72     | 23  | 2.323443846 | 1.436180773 | -0.887263073 | 0.042014   | 0.111565946 |
| Zfp558    | 6   | 1.667927219 | 0.902123823 | -0.765803397 | 0.04202343 | 0.111570788 |
| Pcdha8    | 3   | 78.04710072 | 71.86296092 | -6.184139794 | 0.04204186 | 0.111599537 |
| Aimp1     | 15  | 1.811183592 | 1.335722538 | -0.475461054 | 0.0420744  | 0.111645516 |
| Ebpl      | 12  | 2.47545096  | 1.145776144 | -1.329674816 | 0.04206737 | 0.111645516 |
| Cystm1    | 49  | 1.531010472 | 1.225085953 | -0.305924519 | 0.0421253  | 0.111719976 |
| Fmnl3     | 78  | 1.431149969 | 1.526297166 | 0.095147197  | 0.04212372 | 0.111719976 |
| Sgpp1     | 84  | 1.307004651 | 0.830265169 | -0.476739482 | 0.04211159 | 0.111719976 |
| Twistnb   | 46  | 1.208863527 | 0.852794159 | -0.356069368 | 0.04218238 | 0.111851139 |
| Nfe2l2    | 18  | 3.007053746 | 2.109750364 | -0.897303383 | 0.04220918 | 0.111901996 |

|          |     |             |             |              |            |             |
|----------|-----|-------------|-------------|--------------|------------|-------------|
| Usp45    | 20  | 2.204968819 | 1.24233041  | -0.962638409 | 0.04222481 | 0.111902985 |
| Slc35d1  | 139 | 1.215542562 | 1.320252817 | 0.104710256  | 0.0422189  | 0.111902985 |
| Qdpr     | 42  | 1.276869221 | 1.182008792 | -0.094860429 | 0.04229923 | 0.112079973 |
| Dsp      | 64  | 1.250542374 | 0.817519547 | -0.433022827 | 0.04230809 | 0.112083216 |
| Gprc5b   | 29  | 3.037721894 | 2.241141152 | -0.796580742 | 0.04233631 | 0.112103792 |
| Mir3107  | 7   | 79.83845285 | 75.83964726 | -3.998805594 | 0.04233657 | 0.112103792 |
| Gm7904   | 6   | 95.6506368  | 94.22012209 | -1.430514716 | 0.04233878 | 0.112103792 |
| Tmem198b | 15  | 1.120365673 | 0.862457646 | -0.257908027 | 0.04247147 | 0.11241918  |
| Tex14    | 6   | 98.37289331 | 96.38314754 | -1.989745771 | 0.04247321 | 0.11241918  |
| Nelfb    | 28  | 1.320643187 | 0.721514778 | -0.599128408 | 0.04252833 | 0.112544765 |
| Tmem161a | 3   | 89.6561868  | 91.39515455 | 1.738967754  | 0.04255011 | 0.112582086 |
| Trabd2b  | 77  | 8.107355563 | 6.886150411 | -1.221205152 | 0.04259682 | 0.112685373 |
| Fam193a  | 137 | 1.168426335 | 1.307494758 | 0.139068423  | 0.04272017 | 0.112991306 |
| Stk4     | 27  | 2.111326053 | 1.629342085 | -0.481983967 | 0.04274407 | 0.113034158 |
| Stim2    | 78  | 2.573446078 | 1.630481196 | -0.942964881 | 0.04278501 | 0.113122031 |
| Ube2b    | 71  | 1.499063573 | 1.156959938 | -0.342103636 | 0.04282788 | 0.113214978 |
| Csnk2b   | 59  | 1.70157047  | 1.141272504 | -0.560297966 | 0.04287532 | 0.113279942 |
| Clic4    | 67  | 1.166695713 | 1.204978573 | 0.03828286   | 0.04287562 | 0.113279942 |
| Fundc2   | 4   | 11.66666667 | 16.46870287 | 4.802036199  | 0.04286495 | 0.113279942 |
| Lrrfip2  | 85  | 1.19872828  | 0.917224847 | -0.281503434 | 0.0429085  | 0.113346413 |
| Btg2     | 60  | 1.463035566 | 1.689606249 | 0.226570683  | 0.0429599  | 0.113461762 |
| Ctbs     | 6   | 5.05981161  | 3.349060577 | -1.710751033 | 0.04300799 | 0.113568334 |
| Trappc10 | 57  | 1.67949034  | 1.339133172 | -0.340357168 | 0.0430293  | 0.113604157 |
| Ciart    | 40  | 3.120636425 | 2.433207328 | -0.687429096 | 0.04311293 | 0.11380449  |
| Ccnb1    | 1   | 3.484320557 | 7.189542484 | 3.705221926  | 0.04312834 | 0.113824674 |
| Cisd2    | 90  | 1.047159716 | 1.036720263 | -0.010439453 | 0.04317611 | 0.113930282 |
| Xlr3b    | 4   | 79.2759324  | 72.44824196 | -6.827690439 | 0.04329759 | 0.114230285 |
| Exph5    | 6   | 9.021495974 | 11.15313858 | 2.131642604  | 0.04330868 | 0.114234218 |
| AA387883 | 5   | 45.36376625 | 49.09894927 | 3.735183013  | 0.04331465 | 0.114234218 |
| Plxna4   | 74  | 1.621271487 | 1.142841634 | -0.478429853 | 0.04334363 | 0.114290098 |
| Zmpste24 | 20  | 2.442587964 | 2.030855617 | -0.411732347 | 0.04336578 | 0.114312891 |
| Rimbp2   | 1   | 17.77777778 | 26.06837607 | 8.290598291  | 0.04336785 | 0.114312891 |
| Eif3c    | 42  | 1.290450556 | 0.931007603 | -0.359442954 | 0.04341768 | 0.114403123 |
| Psrc1    | 5   | 1.639708606 | 0.663091483 | -0.976617123 | 0.04341404 | 0.114403123 |

|         |     |             |             |              |            |             |
|---------|-----|-------------|-------------|--------------|------------|-------------|
| Atp13a2 | 54  | 1.302455524 | 1.360683745 | 0.058228221  | 0.04343779 | 0.114435573 |
| Tnpo2   | 23  | 2.276939045 | 1.663273999 | -0.613665046 | 0.04346147 | 0.114477411 |
| Synj2   | 79  | 2.228206174 | 1.954393142 | -0.273813031 | 0.0435459  | 0.114679218 |
| Zbtb37  | 68  | 1.643589772 | 1.857181352 | 0.213591581  | 0.0435949  | 0.114767058 |
| Gas5    | 68  | 1.643589772 | 1.857181352 | 0.213591581  | 0.0435949  | 0.114767058 |
| Vps28   | 23  | 1.167653016 | 1.874268994 | 0.706615978  | 0.04364445 | 0.114876883 |
| Entpd1  | 10  | 21.51060424 | 17.54130606 | -3.969298183 | 0.04368351 | 0.114959081 |
| Zfp459  | 2   | 16.15179252 | 22.68295693 | 6.531164405  | 0.04370558 | 0.114996545 |
| Gm6588  | 1   | 33.51648352 | 24.28571429 | -9.230769231 | 0.04376942 | 0.115143854 |
| Iqcb1   | 12  | 1.093473999 | 1.326173259 | 0.23269926   | 0.0437854  | 0.115144619 |
| Stambp  | 11  | 1.107668749 | 1.209106985 | 0.101438236  | 0.04378049 | 0.115144619 |
| Hgs     | 20  | 1.397148967 | 0.899018289 | -0.498130677 | 0.04382354 | 0.115219621 |
| Tmem82  | 2   | 15.74412118 | 12.89133572 | -2.852785464 | 0.04382963 | 0.115219621 |
| Pex13   | 11  | 1.04923917  | 1.678986193 | 0.629747023  | 0.04386412 | 0.115289656 |
| Sssca1  | 5   | 4.998355241 | 3.958445587 | -1.039909654 | 0.04387325 | 0.115292988 |
| Fmnl2   | 86  | 1.603249527 | 1.249427667 | -0.353821861 | 0.04388621 | 0.115306399 |
| Rere    | 57  | 1.849266569 | 1.578986157 | -0.270280412 | 0.04392164 | 0.115358187 |
| Atp6v1d | 6   | 0.698564418 | 1.65369901  | 0.955134592  | 0.04391653 | 0.115358187 |
| Asb7    | 7   | 1.667129961 | 2.355693495 | 0.688563535  | 0.04396702 | 0.11545669  |
| Pkd1l3  | 3   | 64.27586207 | 71.54931991 | 7.273457838  | 0.0439933  | 0.115505052 |
| Figl1   | 52  | 78.9996011  | 79.34813412 | 0.348533023  | 0.04405554 | 0.115596609 |
| Mir6359 | 7   | 2.86841696  | 1.624138573 | -1.244278388 | 0.04405075 | 0.115596609 |
| Pold1   | 15  | 2.063567717 | 1.376378533 | -0.687189184 | 0.04403952 | 0.115596609 |
| Mrpl40  | 15  | 1.976791704 | 1.488645651 | -0.488146053 | 0.04405969 | 0.115596609 |
| Fbl     | 33  | 1.374404696 | 0.871014314 | -0.503390382 | 0.04412119 | 0.115737284 |
| Nop9    | 32  | 1.52348133  | 1.007301518 | -0.516179812 | 0.04413466 | 0.11575193  |
| Braf    | 53  | 1.060596159 | 0.744984584 | -0.315611575 | 0.04414646 | 0.115762174 |
| Ndor1   | 18  | 1.460574819 | 2.201178875 | 0.740604056  | 0.04423696 | 0.11597876  |
| Tpst1   | 69  | 5.655184479 | 5.583265147 | -0.071919333 | 0.04424671 | 0.115983594 |
| Atp2c1  | 75  | 1.32742288  | 1.009308777 | -0.318114103 | 0.04425486 | 0.115984251 |
| Gclm    | 101 | 1.009456797 | 1.154034091 | 0.144577294  | 0.04430632 | 0.116098379 |
| Pole2   | 30  | 1.333806296 | 1.560464858 | 0.226658563  | 0.04432397 | 0.116123883 |
| Scarb2  | 33  | 0.741415039 | 1.358286031 | 0.616870992  | 0.04436392 | 0.116207819 |
| Ect2l   | 5   | 6.535392674 | 4.369755153 | -2.165637521 | 0.04442191 | 0.116338956 |

|             |     |             |             |              |            |             |
|-------------|-----|-------------|-------------|--------------|------------|-------------|
| Zbtb2       | 87  | 1.267455947 | 1.337133047 | 0.069677099  | 0.04446089 | 0.116420263 |
| Slc29a4     | 57  | 35.86285878 | 37.16597215 | 1.303113365  | 0.04447345 | 0.116432362 |
| Mir3113     | 1   | 88          | 93.30708661 | 5.307086614  | 0.04450908 | 0.11650485  |
| Tomm22      | 49  | 2.014857495 | 1.285673212 | -0.729184283 | 0.04456557 | 0.116631918 |
| Rhbdd3      | 35  | 1.224948745 | 1.664532794 | 0.43958405   | 0.04463408 | 0.116790386 |
| Extl3       | 60  | 1.659469148 | 1.303083009 | -0.356386138 | 0.04470533 | 0.116955974 |
| L3mbtl4     | 17  | 56.20763102 | 54.39684046 | -1.810790555 | 0.04473101 | 0.117002281 |
| Cabin1      | 34  | 1.125490672 | 1.472371979 | 0.346881307  | 0.04476999 | 0.117083371 |
| Khk         | 20  | 2.212957501 | 2.561877369 | 0.348919868  | 0.04483531 | 0.117233315 |
| Kcnq4       | 118 | 6.625244539 | 7.09859263  | 0.473348091  | 0.04484365 | 0.117234221 |
| Iqch        | 53  | 1.397607334 | 1.578886208 | 0.181278874  | 0.04487795 | 0.117302999 |
| Nfkbil1     | 3   | 1.609986691 | 0.824499411 | -0.785487279 | 0.04488725 | 0.117306418 |
| Hcfc1       | 8   | 17.38047085 | 14.91225981 | -2.468211035 | 0.04491517 | 0.11733758  |
| Mast2       | 117 | 1.125581379 | 1.0885279   | -0.037053479 | 0.04491105 | 0.11733758  |
| Clspn       | 21  | 1.95999995  | 1.266671868 | -0.693328082 | 0.04494787 | 0.117402101 |
| Gadd45gip1  | 21  | 1.559367729 | 1.963599246 | 0.404231517  | 0.04501433 | 0.117554783 |
| 133407K13F  | 2   | 19.40789474 | 14.06973308 | -5.338161653 | 0.0450878  | 0.117725696 |
| 30016M11F   | 9   | 1.753218822 | 1.242009016 | -0.511209805 | 0.04518624 | 0.117961719 |
| Capn1       | 25  | 13.46348904 | 12.39736037 | -1.066128671 | 0.04532143 | 0.118293615 |
| Hnrnp1      | 28  | 0.763714209 | 1.158346497 | 0.394632288  | 0.04536457 | 0.118385149 |
| Papss2      | 41  | 1.68601055  | 1.425624194 | -0.260386356 | 0.04544735 | 0.118580077 |
| Nsf         | 59  | 1.076269364 | 1.192907376 | 0.116638012  | 0.04550883 | 0.118719388 |
| Slc16a14    | 29  | 10.9641244  | 10.29565538 | -0.668469024 | 0.04552844 | 0.118743429 |
| Btaf1       | 100 | 1.22258996  | 0.845368204 | -0.377221756 | 0.04553423 | 0.118743429 |
| Synj2bp     | 19  | 2.159522456 | 2.331765991 | 0.172243535  | 0.04566074 | 0.119031037 |
| ynj2bp-cox1 | 19  | 2.159522456 | 2.331765991 | 0.172243535  | 0.04566074 | 0.119031037 |
| Ryr1        | 9   | 34.576149   | 29.91668291 | -4.659466086 | 0.04572727 | 0.119149776 |
| Scamp5      | 41  | 2.496103467 | 1.530783921 | -0.965319546 | 0.04571478 | 0.119149776 |
| Tgfb1       | 2   | 4.430379747 | 0           | -4.430379747 | 0.04573065 | 0.119149776 |
| Vpreb1      | 1   | 99.27272727 | 97.20670391 | -2.066023362 | 0.04583398 | 0.11939779  |
| Tmem110     | 62  | 1.463388233 | 1.577708069 | 0.114319836  | 0.04587573 | 0.119485358 |
| BC030336    | 45  | 1.001783496 | 0.89534479  | -0.106438706 | 0.04594326 | 0.119639991 |
| Phf5a       | 12  | 1.828759234 | 0.691266209 | -1.137493025 | 0.04603995 | 0.119849261 |
| Zfp697      | 12  | 3.200850262 | 2.026147574 | -1.174702688 | 0.04603886 | 0.119849261 |

|            |     |             |             |              |            |             |
|------------|-----|-------------|-------------|--------------|------------|-------------|
| Rbx1       | 23  | 3.20654527  | 2.801531971 | -0.405013299 | 0.04604871 | 0.119850806 |
| Nr6a1      | 40  | 1.564997189 | 1.941043222 | 0.376046032  | 0.04606391 | 0.11986908  |
| Eya1       | 14  | 3.290957462 | 2.581123629 | -0.709833833 | 0.04608918 | 0.119913493 |
| Prrx2      | 74  | 1.843228721 | 1.499629115 | -0.343599606 | 0.04609732 | 0.119913493 |
| Mettl10    | 3   | 3.569226025 | 0.974534073 | -2.594691952 | 0.04617519 | 0.120094776 |
| Xpnpep1    | 54  | 2.093493332 | 1.676589304 | -0.416904028 | 0.04620322 | 0.120146393 |
| Gm10516    | 40  | 2.535545427 | 1.968981955 | -0.566563473 | 0.04622784 | 0.120189103 |
| Pxmp2      | 44  | 1.561007121 | 1.202180215 | -0.358826906 | 0.04624752 | 0.120197692 |
| Ttc39b     | 42  | 1.585034482 | 1.22359381  | -0.361440672 | 0.04624006 | 0.120197692 |
| Slc8a2     | 10  | 6.769339617 | 4.682993778 | -2.086345839 | 0.04625586 | 0.120198056 |
| Pfn2       | 113 | 1.64611885  | 1.486680095 | -0.159438755 | 0.04640676 | 0.120568836 |
| Zfr        | 71  | 1.488557667 | 1.199797084 | -0.288760582 | 0.04641644 | 0.12057265  |
| Etv3       | 56  | 0.999167872 | 1.029661009 | 0.030493137  | 0.04646275 | 0.120671562 |
| Qrich1     | 37  | 1.583548742 | 1.394223713 | -0.189325029 | 0.04651632 | 0.120789323 |
| Acly       | 38  | 2.199364105 | 2.173770409 | -0.025593696 | 0.04652936 | 0.120801814 |
| Decr2      | 15  | 2.020276219 | 2.881376295 | 0.861100076  | 0.04656945 | 0.120884507 |
| Map2k3     | 48  | 1.602325119 | 1.288888745 | -0.313436374 | 0.04657872 | 0.120887175 |
| i00002D24F | 1   | 71.69811321 | 55.05617978 | -16.64193343 | 0.04662681 | 0.120990592 |
| Pbdc1      | 10  | 2.351403158 | 3.335702246 | 0.984299087  | 0.04668083 | 0.121109357 |
| Gtf2f2     | 26  | 0.812254    | 1.004320198 | 0.192066198  | 0.04669612 | 0.121127613 |
| Mpzl2      | 14  | 2.788559648 | 2.402345911 | -0.386213737 | 0.0468353  | 0.12146715  |
| Trpc6      | 4   | 25.26441214 | 32.24301509 | 6.978602949  | 0.04686056 | 0.121511196 |
| Mettl25    | 39  | 1.595936235 | 1.309035944 | -0.286900291 | 0.04687569 | 0.121528952 |
| Rbm12b1    | 5   | 2.152276295 | 2.440672712 | 0.288396417  | 0.04694254 | 0.121666398 |
| Ass1       | 17  | 3.134199935 | 2.249118356 | -0.885081579 | 0.04694529 | 0.121666398 |
| Ythdc2     | 55  | 1.636454041 | 1.344317421 | -0.29213662  | 0.04696916 | 0.121706782 |
| i30522O17F | 3   | 70.97273996 | 65.31058734 | -5.662152618 | 0.04710103 | 0.122026925 |
| Clip1      | 69  | 2.770255087 | 1.600887707 | -1.169367379 | 0.04725557 | 0.122384094 |
| Mzt1       | 134 | 1.125897334 | 0.873632814 | -0.252264521 | 0.04725132 | 0.122384094 |
| C5ar2      | 1   | 28.47222222 | 19.30693069 | -9.165291529 | 0.04736404 | 0.122643357 |
| Hdgfrp2    | 26  | 1.619629295 | 1.011492327 | -0.608136968 | 0.04743277 | 0.122799647 |
| Eif2b5     | 31  | 1.839898548 | 1.146214109 | -0.693684439 | 0.04747165 | 0.122878637 |
| Rftn2      | 6   | 58.13952774 | 64.66364341 | 6.524115667  | 0.04753516 | 0.123021337 |
| Id3        | 26  | 1.473491517 | 1.092807433 | -0.380684084 | 0.04757444 | 0.123101269 |

|            |     |             |             |              |            |             |
|------------|-----|-------------|-------------|--------------|------------|-------------|
| Tubb3      | 32  | 3.770129585 | 2.277477149 | -1.492652436 | 0.04767607 | 0.123321259 |
| Fxyd2      | 2   | 28.39506173 | 13.85542169 | -14.53964004 | 0.04767626 | 0.123321259 |
| Orc5       | 10  | 0.277777778 | 2.415019933 | 2.137242156  | 0.04785408 | 0.123759387 |
| Impg1      | 2   | 96.58119658 | 88.32335329 | -8.257843288 | 0.04787246 | 0.123785118 |
| Fbxo4      | 43  | 1.315646099 | 1.511569554 | 0.195923455  | 0.04791114 | 0.123863293 |
| Fars2      | 36  | 1.281905165 | 1.064364742 | -0.217540423 | 0.04793544 | 0.123904291 |
| Coa3       | 7   | 0.631536906 | 1.604064716 | 0.97252781   | 0.04794864 | 0.123916587 |
| Aldh1l2    | 7   | 9.218908744 | 13.10568696 | 3.886778218  | 0.04796504 | 0.123937136 |
| Hus1b      | 5   | 94.38986341 | 91.71012078 | -2.679742633 | 0.04798491 | 0.123966643 |
| Gm5294     | 10  | 71.47708035 | 73.45103516 | 1.97395481   | 0.04799487 | 0.123970562 |
| Raver1     | 32  | 1.871709938 | 1.711528995 | -0.160180943 | 0.04801216 | 0.123993389 |
| Apln       | 25  | 18.20992548 | 17.00617182 | -1.203753663 | 0.04803743 | 0.124036819 |
| Arl6ip4    | 39  | 2.024412972 | 1.03704764  | -0.987365331 | 0.04807116 | 0.124102066 |
| Taok2      | 10  | 1.523376623 | 1.875907782 | 0.352531159  | 0.048102   | 0.124159853 |
| Flcn       | 27  | 0.61407072  | 0.89829461  | 0.28422389   | 0.04812346 | 0.124171553 |
| Ndufa12    | 37  | 1.768518701 | 1.344264598 | -0.424254103 | 0.04811952 | 0.124171553 |
| Eef1b2     | 45  | 1.874433388 | 1.650593304 | -0.223840084 | 0.04817355 | 0.124278954 |
| Fbxo42     | 77  | 1.175681858 | 0.853082899 | -0.322598959 | 0.04819178 | 0.124304138 |
| Gas2l3     | 19  | 2.781755925 | 2.11826965  | -0.663486275 | 0.04820088 | 0.124305755 |
| Kras       | 129 | 1.13234769  | 0.900644513 | -0.231703176 | 0.04821899 | 0.12433059  |
| Ano2       | 4   | 20.96685082 | 17.98140588 | -2.985444946 | 0.04826526 | 0.124428049 |
| Gpr75      | 9   | 18.0332314  | 21.60619511 | 3.572963705  | 0.04830406 | 0.124506196 |
| Hyal2      | 28  | 2.240986623 | 1.518712734 | -0.722273889 | 0.04833515 | 0.124542587 |
| Fem1b      | 86  | 1.184797893 | 1.105532941 | -0.079264951 | 0.04833405 | 0.124542587 |
| Eif3l      | 40  | 3.525943295 | 4.735145756 | 1.20920246   | 0.04838835 | 0.124657757 |
| G6pd2      | 1   | 95.90163934 | 89.43089431 | -6.470745035 | 0.04843612 | 0.12475892  |
| N4bp2      | 42  | 1.737589477 | 1.520038182 | -0.217551295 | 0.04851721 | 0.124930267 |
| Twf1       | 31  | 1.484779299 | 1.188222556 | -0.296556743 | 0.04851967 | 0.124930267 |
| Cyp4x1os   | 5   | 12.85360746 | 7.665577342 | -5.18803012  | 0.04854116 | 0.124941771 |
| Cyp4x1     | 5   | 12.85360746 | 7.665577342 | -5.18803012  | 0.04854116 | 0.124941771 |
| Mbip       | 13  | 1.647697397 | 1.101380928 | -0.546316469 | 0.04863653 | 0.125165273 |
| !30217C12F | 5   | 8.057962294 | 5.520485135 | -2.537477159 | 0.04867672 | 0.125246753 |
| Timm13     | 39  | 11.37233418 | 11.06740459 | -0.304929586 | 0.04870472 | 0.125296831 |
| Gpr139     | 22  | 50.38101739 | 47.92562965 | -2.455387747 | 0.04872838 | 0.125335722 |



|            |     |             |             |              |            |             |
|------------|-----|-------------|-------------|--------------|------------|-------------|
| Bsdc1      | 20  | 1.775476386 | 2.181700646 | 0.406224261  | 0.04893545 | 0.125846278 |
| Mir6956    | 2   | 95.1597017  | 91.69239359 | -3.467308113 | 0.04910632 | 0.126263549 |
| Dnaaf5     | 87  | 1.379995604 | 1.077299795 | -0.302695808 | 0.04913684 | 0.126319909 |
| Ppp3r1     | 82  | 1.166064785 | 1.360647911 | 0.194583126  | 0.04916118 | 0.12636034  |
| Npnt       | 95  | 1.780758088 | 1.39883954  | -0.381918548 | 0.04919515 | 0.126425506 |
| Snora21    | 24  | 1.599948395 | 1.126922081 | -0.473026314 | 0.04927396 | 0.126605859 |
| Lin28a     | 6   | 9.276724447 | 7.36801418  | -1.908710267 | 0.04931644 | 0.126692841 |
| Zscan25    | 13  | 87.79884236 | 86.49284309 | -1.305999261 | 0.04936679 | 0.126799982 |
| Arl5b      | 73  | 1.153514704 | 1.293571067 | 0.140056363  | 0.04950412 | 0.127130451 |
| Gm16833    | 1   | 87.27272727 | 96.2962963  | 9.023569024  | 0.0495606  | 0.127253242 |
| Socs5      | 86  | 1.556701271 | 1.37542376  | -0.181277512 | 0.04957565 | 0.127269601 |
| Bcl3       | 70  | 1.406244411 | 1.018388974 | -0.387855437 | 0.04960606 | 0.127325397 |
| Flt3l      | 11  | 5.090557674 | 3.692250401 | -1.398307273 | 0.04964579 | 0.127405092 |
| Nat14      | 9   | 63.72773276 | 66.62894521 | 2.901212444  | 0.04979633 | 0.127769083 |
| Epb4.1l4b  | 215 | 1.493842145 | 1.232578623 | -0.261263522 | 0.04988026 | 0.127962058 |
| Cdk7       | 29  | 1.34066389  | 1.930597993 | 0.589934103  | 0.04989744 | 0.127983741 |
| Arf3       | 69  | 1.363327629 | 1.441919821 | 0.078592191  | 0.0500297  | 0.12830056  |
| Bcl9       | 63  | 1.793352314 | 2.092987914 | 0.2996356    | 0.05010702 | 0.128476394 |
| Atxn1l     | 14  | 2.509301511 | 0.957175406 | -1.552126105 | 0.05016286 | 0.128597102 |
| Deaf1      | 64  | 2.103085707 | 1.670031529 | -0.433054179 | 0.05018468 | 0.128608099 |
| Mir194-1   | 6   | 95.72190456 | 94.12058061 | -1.601323949 | 0.05018268 | 0.128608099 |
| Lpcat1     | 37  | 1.184774305 | 0.55576886  | -0.629005445 | 0.05021967 | 0.128675304 |
| 700007L15F | 16  | 0.963492808 | 1.380038488 | 0.41654568   | 0.05024915 | 0.128706141 |
| Mir7014    | 7   | 82.85247896 | 74.58575404 | -8.266724924 | 0.05024925 | 0.128706141 |
| Actn3      | 12  | 43.03463798 | 45.24682753 | 2.21218955   | 0.05025858 | 0.128707571 |
| Snhg9      | 7   | 0.793650794 | 0.072150072 | -0.721500722 | 0.05034518 | 0.128906845 |
| Cks1b      | 14  | 2.849575228 | 2.078101    | -0.771474228 | 0.05038719 | 0.128991907 |
| Cped1      | 5   | 5.587214399 | 7.96628887  | 2.37907447   | 0.0504741  | 0.129146816 |
| 430402l18R | 65  | 1.050920074 | 0.987991405 | -0.062928669 | 0.05045967 | 0.129146816 |
| Fbxo7      | 50  | 1.282034466 | 0.938007256 | -0.34402721  | 0.05046897 | 0.129146816 |
| Pigt       | 17  | 1.326784583 | 0.686778787 | -0.640005796 | 0.05051797 | 0.12923651  |
| Pi4k2b     | 44  | 1.241816764 | 0.827481378 | -0.414335386 | 0.05063871 | 0.129522827 |
| Tmem52     | 6   | 82.30719406 | 77.7808498  | -4.526344257 | 0.05081273 | 0.129945286 |
| Prmt7      | 21  | 1.425640792 | 0.992726448 | -0.432914345 | 0.05084358 | 0.130001517 |

|            |     |             |             |              |            |             |
|------------|-----|-------------|-------------|--------------|------------|-------------|
| Tekt2      | 12  | 84.62378486 | 82.0629771  | -2.56080776  | 0.05085287 | 0.130002613 |
| Pdcl3      | 41  | 2.17648538  | 1.936266994 | -0.240218387 | 0.0508654  | 0.130011993 |
| Pex6       | 86  | 1.379582423 | 1.128723818 | -0.250858605 | 0.05094693 | 0.13019771  |
| Stam       | 28  | 0.991717567 | 0.465152805 | -0.526564762 | 0.05100603 | 0.130326034 |
| Preli1     | 11  | 1.741927655 | 0.923458547 | -0.818469108 | 0.05120884 | 0.130821457 |
| Gm5069     | 30  | 2.389883145 | 1.91033731  | -0.479545835 | 0.05124315 | 0.130863543 |
| Syap1      | 17  | 31.21879952 | 27.5172518  | -3.701547726 | 0.05123547 | 0.130863543 |
| Med22      | 12  | 1.105755382 | 1.073547547 | -0.032207835 | 0.05126754 | 0.130903053 |
| Zfp771     | 46  | 1.67894891  | 1.717422118 | 0.038473209  | 0.051292   | 0.130923586 |
| Adam15     | 56  | 2.754590715 | 3.011486139 | 0.256895424  | 0.05129342 | 0.130923586 |
| Nobox      | 1   | 88.24940048 | 83.57142857 | -4.677971908 | 0.05132972 | 0.130993445 |
| Mroh1      | 38  | 8.361996575 | 6.580576662 | -1.781419913 | 0.05139955 | 0.131148851 |
| Phkb       | 11  | 1.181646756 | 0.932523063 | -0.249123693 | 0.05144894 | 0.131229225 |
| 121531C22F | 29  | 1.54682562  | 1.90796198  | 0.36113636   | 0.05144562 | 0.131229225 |
| 30309D02F  | 47  | 1.084197393 | 0.619400439 | -0.464796953 | 0.05157179 | 0.131519717 |
| Gtf2ird1   | 36  | 2.804380762 | 2.368103503 | -0.436277259 | 0.05166222 | 0.131717638 |
| 2-Mar      | 9   | 1.639566396 | 1.264832794 | -0.374733602 | 0.05166735 | 0.131717638 |
| Mir7083    | 4   | 95.55421167 | 91.99548506 | -3.558726605 | 0.05170689 | 0.131772635 |
| Zfp664     | 116 | 1.502500848 | 1.320399638 | -0.18210121  | 0.05170315 | 0.131772635 |
| Rgs22      | 8   | 9.239581111 | 8.008851673 | -1.230729438 | 0.05173688 | 0.131802801 |
| Kank2      | 36  | 1.035100147 | 1.513009546 | 0.477909399  | 0.05174483 | 0.131802801 |
| Polr2g     | 8   | 2.162320738 | 1.402989707 | -0.759331031 | 0.05174567 | 0.131802801 |
| 30080D01F  | 27  | 19.21489704 | 17.47976421 | -1.735132829 | 0.05180328 | 0.131903758 |
| Slc9a3r1   | 49  | 1.436054674 | 1.108737023 | -0.32731765  | 0.05179673 | 0.131903758 |
| Gm7120     | 48  | 5.53053069  | 4.457142207 | -1.073388484 | 0.05182742 | 0.13194232  |
| Pcsk7      | 84  | 1.319310346 | 1.288773719 | -0.030536627 | 0.05186568 | 0.132016836 |
| Mocos      | 31  | 1.487943586 | 1.622037889 | 0.134094303  | 0.05190203 | 0.132086429 |
| Birc5      | 40  | 1.235443959 | 1.24921985  | 0.013775891  | 0.05196052 | 0.132212355 |
| Bnip3l     | 64  | 1.34243859  | 1.037623721 | -0.304814868 | 0.05197273 | 0.132220499 |
| Kpna1      | 112 | 1.436109385 | 1.31746992  | -0.118639465 | 0.05201561 | 0.132306642 |
| Kidins220  | 16  | 0.848131379 | 1.626866164 | 0.778734785  | 0.05206003 | 0.132396699 |
| Gm13807    | 1   | 73.56321839 | 81.55737705 | 7.994158658  | 0.05210302 | 0.132450726 |
| Zfp426     | 20  | 1.07022581  | 1.771512376 | 0.701286566  | 0.05210297 | 0.132450726 |
| Hvcn1      | 7   | 48.68773861 | 46.94329224 | -1.744446372 | 0.0521086  | 0.132450726 |

|            |    |             |             |              |            |             |
|------------|----|-------------|-------------|--------------|------------|-------------|
| Slc25a40   | 45 | 1.079652601 | 0.909660149 | -0.169992452 | 0.05211738 | 0.132450726 |
| Nap1l1     | 56 | 1.451689789 | 1.229728638 | -0.221961151 | 0.05212698 | 0.132452174 |
| Gm10789    | 17 | 34.83919174 | 33.63659963 | -1.202592108 | 0.05223814 | 0.132711645 |
| Cabp1      | 10 | 69.30645501 | 71.69069228 | 2.384237264  | 0.05225508 | 0.132731694 |
| Rasl11b    | 43 | 0.88244051  | 1.18613118  | 0.30369067   | 0.05227408 | 0.132756985 |
| Kctd11     | 42 | 1.761453886 | 2.092623496 | 0.331169609  | 0.05228319 | 0.132757149 |
| Hif1a      | 45 | 1.196964211 | 0.839917336 | -0.357046876 | 0.0523479  | 0.132898463 |
| Srrt       | 30 | 2.282488778 | 1.643464866 | -0.639023913 | 0.05240571 | 0.133022215 |
| Lat        | 15 | 87.29435399 | 85.04433241 | -2.250021577 | 0.05244595 | 0.133101333 |
| Trove2     | 43 | 1.438722107 | 1.649104483 | 0.210382376  | 0.05246715 | 0.133109099 |
| Tor1a      | 44 | 1.269341539 | 1.38394121  | 0.114599671  | 0.05246375 | 0.133109099 |
| Aars       | 7  | 1.167313226 | 1.965097534 | 0.797784307  | 0.05249412 | 0.133154481 |
| Fzd1       | 44 | 1.596307747 | 1.222403882 | -0.373903866 | 0.05250329 | 0.133154741 |
| Parm1      | 27 | 2.103102229 | 1.306217056 | -0.796885172 | 0.05253032 | 0.13320026  |
| Plekhd1    | 33 | 9.43249109  | 11.0575285  | 1.625037412  | 0.05258428 | 0.133314039 |
| Tmem199    | 29 | 1.46724096  | 1.19215615  | -0.27508481  | 0.05266205 | 0.13348816  |
| Bora       | 71 | 1.236187896 | 0.88842118  | -0.347766716 | 0.05276133 | 0.133716703 |
| Guf1       | 45 | 1.48106745  | 1.131126276 | -0.349941174 | 0.05283243 | 0.133873792 |
| Tspan5     | 85 | 1.888012018 | 2.529848584 | 0.641836566  | 0.05287776 | 0.133965515 |
| Tmem194b   | 23 | 1.814809363 | 1.03404768  | -0.780761683 | 0.052912   | 0.134029131 |
| Mcrs1      | 19 | 1.282989787 | 1.565234317 | 0.282244529  | 0.05295205 | 0.134107417 |
| Tdg        | 12 | 0.467722654 | 0.9913051   | 0.523582446  | 0.05298705 | 0.134172895 |
| Arf2       | 25 | 0.963220323 | 0.467017306 | -0.496203017 | 0.05304668 | 0.134300724 |
| Plxnb2     | 56 | 1.787078267 | 1.426688506 | -0.360389761 | 0.05313093 | 0.134490824 |
| Mpp5       | 85 | 1.489346206 | 1.268343811 | -0.221002396 | 0.0532524  | 0.134775058 |
| Hacd1      | 72 | 2.114713249 | 1.474345483 | -0.640367766 | 0.05349443 | 0.135364255 |
| Pgm3       | 18 | 1.723591961 | 2.277506528 | 0.553914567  | 0.05353919 | 0.135454156 |
| 121507P07F | 51 | 2.728241596 | 2.410507394 | -0.317734202 | 0.05358283 | 0.13551801  |
| Nle1       | 46 | 1.573762555 | 0.962205504 | -0.611557051 | 0.0535829  | 0.13551801  |
| Rfc4       | 33 | 1.005290493 | 1.394701017 | 0.389410524  | 0.05362951 | 0.135612511 |
| Ccdc42b    | 1  | 53.94736842 | 44.88888889 | -9.058479532 | 0.05368179 | 0.135721335 |
| Ndr1       | 40 | 5.791064234 | 3.522022781 | -2.269041452 | 0.05374964 | 0.135869454 |
| Hoxb2      | 5  | 61.68455699 | 55.7402528  | -5.944304192 | 0.05376858 | 0.135893416 |
| Klf4       | 69 | 1.363718179 | 1.46943906  | 0.105720881  | 0.05377764 | 0.135893416 |

|            |     |             |             |              |            |             |
|------------|-----|-------------|-------------|--------------|------------|-------------|
| Glb1l2     | 7   | 21.66423623 | 20.07909787 | -1.585138359 | 0.05380957 | 0.13595069  |
| Actn1      | 50  | 2.122243823 | 1.803158186 | -0.319085637 | 0.05382333 | 0.135962057 |
| Ep300      | 106 | 1.351125243 | 1.113272383 | -0.237852859 | 0.05386766 | 0.1360506   |
| Pebp1      | 46  | 6.89250155  | 6.216159868 | -0.676341682 | 0.05396445 | 0.136271601 |
| Senp2      | 58  | 1.432243613 | 1.305672152 | -0.126571461 | 0.05410029 | 0.136591136 |
| 700104L18F | 2   | 82.50314692 | 77.49405234 | -5.009094577 | 0.05415555 | 0.136707138 |
| Cypr1      | 7   | 39.88216606 | 37.56883015 | -2.313335908 | 0.05417443 | 0.136731268 |
| Brms1      | 31  | 1.187026634 | 1.487234792 | 0.300208158  | 0.05433535 | 0.137113835 |
| Rabgef1    | 69  | 3.74582661  | 3.225475101 | -0.520351508 | 0.05442097 | 0.137295175 |
| Fbxw2      | 49  | 1.352527176 | 1.41944586  | 0.066918683  | 0.05442593 | 0.137295175 |
| Bud31      | 29  | 1.166516452 | 1.619743476 | 0.453227024  | 0.05445005 | 0.13733243  |
| Gmfg       | 27  | 1.329721435 | 1.00527344  | -0.324447996 | 0.05460738 | 0.137705575 |
| Smarce1    | 31  | 0.773142018 | 1.230927857 | 0.457785839  | 0.05464764 | 0.137783424 |
| Pvrl2      | 34  | 1.998272112 | 2.386922769 | 0.388650657  | 0.05468451 | 0.137852676 |
| Pgm2       | 32  | 0.614722485 | 1.064280638 | 0.449558153  | 0.05482712 | 0.138164726 |
| Tle3       | 24  | 1.265233491 | 0.605823674 | -0.659409817 | 0.05482649 | 0.138164726 |
| Ooep       | 8   | 6.572570457 | 5.919055346 | -0.653515112 | 0.05494683 | 0.138442624 |
| Zfp3       | 61  | 1.529631359 | 1.053304991 | -0.476326368 | 0.05503228 | 0.138634108 |
| Itgb1bp1   | 28  | 1.889910071 | 1.191699282 | -0.698210789 | 0.05517266 | 0.138963899 |
| Cnpy2      | 10  | 1.329697329 | 2.394940483 | 1.065243155  | 0.05532379 | 0.13932063  |
| Mir1961    | 2   | 43.68421053 | 35.54216867 | -8.142041852 | 0.05533626 | 0.139328132 |
| Fiz1       | 15  | 0.866722652 | 1.03826286  | 0.171540209  | 0.05554711 | 0.139811036 |
| '30408K05F | 14  | 1.468047055 | 0.858746768 | -0.609300287 | 0.05554013 | 0.139811036 |
| Rbbp4      | 63  | 1.184152865 | 1.422686513 | 0.238533649  | 0.05559055 | 0.13986465  |
| Ulk3       | 44  | 1.556308381 | 1.16554065  | -0.390767731 | 0.05558779 | 0.13986465  |
| Armc2      | 13  | 5.761990673 | 4.213638665 | -1.548352008 | 0.05559701 | 0.13986465  |
| Vgf        | 44  | 9.561132367 | 8.096604153 | -1.464528214 | 0.05569816 | 0.140095105 |
| H2-M5      | 2   | 75.18796992 | 81.79347826 | 6.605508336  | 0.05574655 | 0.140192772 |
| Hgsnat     | 22  | 1.38804542  | 1.022838436 | -0.365206984 | 0.0557802  | 0.140205313 |
| Prss48     | 10  | 93.7122758  | 92.14514194 | -1.567133857 | 0.05577626 | 0.140205313 |
| Sez6l      | 39  | 55.03319881 | 56.61719634 | 1.58399753   | 0.05576383 | 0.140205313 |
| Fam19a3    | 21  | 29.60298443 | 28.12011315 | -1.482871272 | 0.05586324 | 0.140389998 |
| Fam64a     | 32  | 1.382356643 | 1.708778951 | 0.326422308  | 0.05603044 | 0.140786076 |
| Myh14      | 20  | 24.05780295 | 26.01196039 | 1.954157446  | 0.05609906 | 0.140934361 |

|           |     |             |             |              |            |             |
|-----------|-----|-------------|-------------|--------------|------------|-------------|
| Hhip      | 20  | 19.14881922 | 17.12537565 | -2.023443565 | 0.05616445 | 0.141055092 |
| Perp      | 54  | 5.197125533 | 4.511494947 | -0.685630586 | 0.05616634 | 0.141055092 |
| Gzf1      | 23  | 1.737131674 | 1.472739238 | -0.264392436 | 0.05626568 | 0.141280384 |
| 10044O15R | 2   | 5.679674099 | 3.423215399 | -2.256458701 | 0.05631161 | 0.141356603 |
| Pgm1      | 44  | 2.136862151 | 1.719194831 | -0.41766732  | 0.0563153  | 0.141356603 |
| Timm50    | 36  | 1.21353819  | 0.958284677 | -0.255253513 | 0.05644021 | 0.141645917 |
| Rpl22     | 11  | 59.08426167 | 60.68456469 | 1.60030302   | 0.05646679 | 0.141688385 |
| Klf7      | 41  | 1.209874606 | 1.060798334 | -0.149076272 | 0.05648957 | 0.141721304 |
| Zfp825    | 3   | 4.82146736  | 3.110962678 | -1.710504681 | 0.05650228 | 0.141728958 |
| Eif1ad    | 59  | 1.230767574 | 1.152660421 | -0.078107153 | 0.05651219 | 0.141729599 |
| Cdc27     | 47  | 1.111654982 | 0.82802898  | -0.283626002 | 0.05656232 | 0.14183108  |
| Duoxa1    | 16  | 43.54654249 | 40.24316662 | -3.303375862 | 0.05658795 | 0.141871117 |
| Stxbp5    | 84  | 1.340213202 | 0.914825122 | -0.42538808  | 0.05661931 | 0.141889355 |
| Cbr2      | 6   | 86.08282508 | 82.31676673 | -3.766058352 | 0.05660593 | 0.141889355 |
| Nmrk1     | 6   | 3.609330415 | 1.871088166 | -1.738242249 | 0.05662424 | 0.141889355 |
| Ubr5      | 103 | 0.967880095 | 1.090959583 | 0.123079488  | 0.056678   | 0.141999821 |
| Ythdf2    | 63  | 1.2798186   | 1.098866723 | -0.180951877 | 0.05675842 | 0.14215276  |
| Rfx4      | 21  | 25.30515624 | 24.3097389  | -0.995417331 | 0.0567506  | 0.14215276  |
| Galk1     | 15  | 1.967659111 | 1.579392144 | -0.388266967 | 0.05678419 | 0.142193049 |
| Kcmf1     | 128 | 1.067562377 | 1.161776531 | 0.094214153  | 0.05680901 | 0.142230923 |
| Chrnbl    | 24  | 1.506163906 | 1.789687668 | 0.283523762  | 0.0569229  | 0.142491757 |
| Prss23    | 72  | 2.753176943 | 2.466742687 | -0.286434257 | 0.05695533 | 0.14252431  |
| Trim67    | 56  | 5.087461748 | 5.614884667 | 0.52742292   | 0.05694902 | 0.14252431  |
| Gon4l     | 4   | 0.462962963 | 1.742976554 | 1.280013591  | 0.0571588  | 0.1429847   |
| Eps15l1   | 22  | 1.131133189 | 0.551619256 | -0.579513932 | 0.0571558  | 0.1429847   |
| Bmper     | 83  | 1.928159586 | 1.663218414 | -0.264941171 | 0.05724039 | 0.143164392 |
| St6gal1   | 22  | 2.774210037 | 2.056718572 | -0.717491465 | 0.05733429 | 0.143350389 |
| Rab32     | 23  | 44.47303171 | 45.8177573  | 1.344725594  | 0.05733389 | 0.143350389 |
| D2Wsu81e  | 21  | 2.36529505  | 1.739875402 | -0.625419648 | 0.05738814 | 0.143460577 |
| Sirt4     | 3   | 0.508905852 | 2.517744744 | 2.008838891  | 0.0574307  | 0.143542512 |
| Cd9       | 27  | 1.31953596  | 1.1364391   | -0.18309686  | 0.05759363 | 0.143925221 |
| Aldh1b1   | 26  | 17.04727988 | 17.577908   | 0.530628119  | 0.05764203 | 0.144021637 |
| Dnpep     | 67  | 0.813661124 | 0.942320571 | 0.128659447  | 0.05767515 | 0.14407987  |
| Hs3st1    | 18  | 1.678214865 | 1.253375673 | -0.424839192 | 0.05769698 | 0.144109878 |

|            |     |             |             |              |            |             |
|------------|-----|-------------|-------------|--------------|------------|-------------|
| Pafah2     | 4   | 61.04166667 | 56.00446529 | -5.037201373 | 0.05773766 | 0.144186934 |
| Ifngr2     | 34  | 2.116790741 | 1.180234032 | -0.936556709 | 0.05775453 | 0.144204529 |
| Utrn       | 1   | 54.45544554 | 40.86021505 | -13.59523049 | 0.05784485 | 0.144405474 |
| '32416N19F | 61  | 1.384504547 | 1.167163783 | -0.217340764 | 0.05790981 | 0.144543041 |
| Draxin     | 34  | 10.35179005 | 9.224604836 | -1.127185218 | 0.05793166 | 0.144572978 |
| Psmid2     | 42  | 1.152149582 | 1.307917736 | 0.155768155  | 0.05797509 | 0.144656761 |
| R3hcc1     | 19  | 1.6072713   | 0.990189402 | -0.617081899 | 0.05799661 | 0.14466161  |
| Gm11696    | 24  | 1.105043847 | 1.564650187 | 0.45960634   | 0.05799675 | 0.14466161  |
| Zc3h13     | 33  | 1.462088189 | 0.954053808 | -0.508034381 | 0.05800669 | 0.144661813 |
| Rad51b     | 15  | 1.710779292 | 1.072975392 | -0.6378039   | 0.05803001 | 0.144690914 |
| Pax9       | 9   | 3.639167938 | 2.657348178 | -0.981819759 | 0.05803808 | 0.144690914 |
| Mnd1       | 22  | 1.118130327 | 1.963462415 | 0.845332088  | 0.05807296 | 0.144753292 |
| Mir6905    | 8   | 86.11192414 | 85.09048077 | -1.021443375 | 0.0581817  | 0.144999718 |
| Nsmce1     | 29  | 11.0885532  | 9.757772938 | -1.33078026  | 0.05824025 | 0.145120979 |
| Csrnp1     | 3   | 55.86149353 | 61.95288806 | 6.091394528  | 0.05827858 | 0.145191824 |
| Msl1       | 129 | 1.62865994  | 1.42460208  | -0.20405786  | 0.05833771 | 0.14531448  |
| Abi3       | 1   | 48.93617021 | 37.5        | -11.43617021 | 0.05839178 | 0.145424473 |
| Nrbp1      | 97  | 1.376845982 | 1.229580386 | -0.147265596 | 0.05845915 | 0.145567537 |
| Al464131   | 7   | 2.254953266 | 3.297929553 | 1.042976287  | 0.05856014 | 0.145769553 |
| C87436     | 14  | 2.386195707 | 1.448124426 | -0.938071281 | 0.05855721 | 0.145769553 |
| Wnt6       | 53  | 8.004619624 | 7.437518172 | -0.567101452 | 0.05857414 | 0.145779668 |
| Rnf40      | 34  | 1.719403259 | 1.558879344 | -0.160523915 | 0.05860107 | 0.145821968 |
| Mia3       | 60  | 2.011689953 | 1.548207451 | -0.463482502 | 0.05862998 | 0.145869152 |
| Vps51      | 14  | 1.950083658 | 1.676365847 | -0.273717811 | 0.05865374 | 0.145903548 |
| Clcc1      | 13  | 0.856444319 | 0.503271322 | -0.353172997 | 0.05868264 | 0.145950695 |
| Lgr6       | 17  | 2.52832341  | 3.564892051 | 1.036568641  | 0.05882462 | 0.146279026 |
| Ranbp2     | 70  | 0.876547322 | 0.950125681 | 0.073578359  | 0.05885612 | 0.146332556 |
| Mad211     | 32  | 1.331464175 | 1.830295382 | 0.498831207  | 0.05896383 | 0.146575513 |
| St7        | 70  | 0.88944153  | 1.189021073 | 0.299579543  | 0.05905328 | 0.146773012 |
| Mafk       | 43  | 1.635830715 | 1.371570986 | -0.264259729 | 0.05911737 | 0.146907415 |
| Rnf133     | 2   | 76.47058824 | 66.30952381 | -10.16106443 | 0.05916972 | 0.147012616 |
| Stk17b     | 100 | 1.343547326 | 0.956044075 | -0.387503251 | 0.05921118 | 0.147090709 |
| Med24      | 1   | 7           | 3.533568905 | -3.466431095 | 0.05922343 | 0.147096247 |
| Rcn2       | 33  | 0.859230868 | 1.371337532 | 0.512106665  | 0.05925338 | 0.147145737 |

|          |     |             |             |              |            |             |
|----------|-----|-------------|-------------|--------------|------------|-------------|
| Rerg     | 46  | 53.13425276 | 51.98852715 | -1.145725618 | 0.05929776 | 0.147231028 |
| Sec22b   | 16  | 1.848171537 | 1.300703158 | -0.547468379 | 0.05942    | 0.147509584 |
| Wdr82    | 70  | 1.508441446 | 1.143056263 | -0.365385182 | 0.05944332 | 0.1475425   |
| Mrps26   | 42  | 1.389940111 | 2.014944797 | 0.625004686  | 0.05948323 | 0.147616595 |
| Gm16796  | 24  | 1.339686549 | 0.871030298 | -0.468656251 | 0.05950183 | 0.14763779  |
| Wdsub1   | 32  | 1.458341573 | 1.611270688 | 0.152929114  | 0.05951627 | 0.147648637 |
| Fbxl20   | 125 | 1.639036034 | 1.263004688 | -0.376031346 | 0.05971588 | 0.148118791 |
| Fam102b  | 63  | 1.083057583 | 0.916144976 | -0.166912607 | 0.05973818 | 0.148149081 |
| Lrrc41   | 34  | 0.987342235 | 1.45186816  | 0.464525925  | 0.05975131 | 0.148156584 |
| Sema7a   | 100 | 6.69207159  | 6.080931427 | -0.611140163 | 0.05976661 | 0.148169502 |
| Daam1    | 12  | 0.587930039 | 1.232904946 | 0.644974907  | 0.05978364 | 0.14818667  |
| Has2     | 4   | 6.882652934 | 5.345644857 | -1.537008077 | 0.05982152 | 0.14825554  |
| Psmb8    | 13  | 2.56560319  | 1.188012282 | -1.377590908 | 0.0598776  | 0.148369458 |
| Glis3    | 66  | 1.531133618 | 1.332426355 | -0.198707263 | 0.05999219 | 0.148628296 |
| Ctsl     | 35  | 1.875383543 | 1.160849925 | -0.714533618 | 0.06001468 | 0.14865891  |
| Trh      | 15  | 11.29381938 | 12.83605212 | 1.542232745  | 0.06008793 | 0.148815236 |
| Mfsd7c   | 27  | 6.244874691 | 8.114497105 | 1.869622414  | 0.06020627 | 0.149083154 |
| Itpka    | 100 | 1.61440377  | 1.102712109 | -0.511691661 | 0.06022563 | 0.149105937 |
| Kntc1    | 4   | 0           | 1.058467742 | 1.058467742  | 0.06024921 | 0.149139156 |
| Ckap2l   | 19  | 1.39885127  | 0.974953879 | -0.42389739  | 0.06026884 | 0.149162586 |
| Nasp     | 21  | 1.014686649 | 1.293685883 | 0.278999234  | 0.06051214 | 0.149739474 |
| Cpne1    | 65  | 1.587480117 | 1.499270627 | -0.08820949  | 0.06055989 | 0.149807122 |
| Rbm12    | 65  | 1.587480117 | 1.499270627 | -0.08820949  | 0.06055989 | 0.149807122 |
| Ccne2    | 154 | 1.264391237 | 1.329756655 | 0.065365418  | 0.06059503 | 0.149868785 |
| Mif      | 15  | 1.67500671  | 2.546249126 | 0.871242416  | 0.06063874 | 0.149951608 |
| Npm3-ps1 | 8   | 93.46038299 | 95.82284638 | 2.362463389  | 0.06066966 | 0.150002791 |
| Rbm17    | 77  | 1.39638502  | 1.075245334 | -0.321139686 | 0.06069871 | 0.150049343 |
| Cdr2     | 42  | 1.813794761 | 1.424049564 | -0.389745197 | 0.06075947 | 0.15017423  |
| Luc7l3   | 67  | 1.358479602 | 1.103086845 | -0.255392757 | 0.06078097 | 0.150202075 |
| Depdc7   | 42  | 1.955412389 | 1.377059219 | -0.57835317  | 0.06083119 | 0.150300871 |
| Exoc6b   | 32  | 0.848110274 | 1.691821095 | 0.84371082   | 0.06089794 | 0.150440475 |
| Tfdp2    | 35  | 1.300901049 | 1.659500233 | 0.358599184  | 0.06092003 | 0.150469712 |
| Slc26a2  | 37  | 1.050655042 | 1.195847486 | 0.145192445  | 0.06094443 | 0.150504645 |
| Fam192a  | 33  | 1.234221173 | 1.100027    | -0.134194174 | 0.06098054 | 0.15056848  |

|             |     |             |             |              |            |             |
|-------------|-----|-------------|-------------|--------------|------------|-------------|
| Kdm6a       | 60  | 1.639737236 | 1.255990695 | -0.383746541 | 0.06100963 | 0.150614969 |
| Rtkn2       | 37  | 2.538300081 | 2.035850757 | -0.502449324 | 0.06104273 | 0.150671329 |
| Fam69a      | 65  | 1.067348988 | 1.109581726 | 0.042232739  | 0.06113933 | 0.150884391 |
| Tgfbr3l     | 1   | 43.10344828 | 34.03361345 | -9.06983483  | 0.06121627 | 0.151048847 |
| L10009E18F  | 12  | 2.499330894 | 1.395970581 | -1.103360313 | 0.06126349 | 0.151086124 |
| Ppfibp2     | 26  | 9.463411743 | 7.911654465 | -1.551757278 | 0.06127256 | 0.151086124 |
| Ccdc150     | 12  | 1.52000727  | 1.856562719 | 0.336555449  | 0.06126878 | 0.151086124 |
| Gm11423     | 2   | 4.915830739 | 2.511312783 | -2.404517956 | 0.06124864 | 0.151086124 |
| Pecr        | 5   | 3.366499808 | 2.539219082 | -0.827280725 | 0.0613206  | 0.151179169 |
| Zfp335      | 71  | 5.866290111 | 5.574634379 | -0.291655732 | 0.06142189 | 0.151352623 |
| Eml3        | 49  | 1.541402694 | 0.97926191  | -0.562140784 | 0.06141454 | 0.151352623 |
| Ormdl1      | 37  | 0.960653922 | 1.13268186  | 0.172027938  | 0.06140219 | 0.151352623 |
| Exosc9      | 13  | 0.617901719 | 1.023121451 | 0.405219732  | 0.06156989 | 0.151691843 |
| i30601H04F  | 9   | 1.748450996 | 3.47995364  | 1.731502644  | 0.06164315 | 0.151846842 |
| Cdkn2b      | 47  | 1.864771078 | 1.599028959 | -0.265742119 | 0.06166224 | 0.151868374 |
| Ctbp2       | 119 | 11.68591848 | 11.47427739 | -0.211641095 | 0.06174481 | 0.152046206 |
| Pmpca       | 15  | 1.817858394 | 1.024011014 | -0.79384738  | 0.06182422 | 0.152216208 |
| Wbscr22     | 55  | 1.555831283 | 1.189439474 | -0.366391809 | 0.06183967 | 0.152228704 |
| Rhbg        | 21  | 1.786939408 | 2.111890815 | 0.324951408  | 0.06198429 | 0.152559126 |
| Fam129b     | 59  | 2.397842401 | 1.800727034 | -0.597115367 | 0.06203598 | 0.152660747 |
| !30014O12F  | 3   | 66.78310642 | 61.96942975 | -4.813676673 | 0.0620538  | 0.152663199 |
| Obscn       | 2   | 83.6236091  | 81.2962963  | -2.327312799 | 0.06205779 | 0.152663199 |
| Prrxl1      | 36  | 41.87141398 | 41.97193743 | 0.100523451  | 0.0620731  | 0.152675281 |
| Pkn2        | 123 | 1.354723744 | 1.038542188 | -0.316181556 | 0.06213839 | 0.152810245 |
| Kansl1l     | 147 | 1.485200818 | 1.339260105 | -0.145940712 | 0.06215415 | 0.152823382 |
| Gcnt2       | 16  | 2.268467806 | 1.515642731 | -0.752825075 | 0.0622005  | 0.152911727 |
| Nadk2       | 90  | 1.281463347 | 1.050867433 | -0.230595914 | 0.06234429 | 0.153239556 |
| D5Erttd579e | 57  | 2.017620343 | 1.607577106 | -0.410043236 | 0.06254015 | 0.153642053 |
| Chst2       | 91  | 23.72386576 | 23.65175604 | -0.072109722 | 0.06254993 | 0.153642053 |
| Rrm1        | 6   | 2.652213805 | 1.492126635 | -1.16008717  | 0.06251907 | 0.153642053 |
| Samm50      | 31  | 1.278052333 | 1.524680725 | 0.246628392  | 0.06253574 | 0.153642053 |
| Tnpo3       | 12  | 1.576601474 | 1.416023768 | -0.160577706 | 0.0626917  | 0.153964529 |
| Nudt12      | 10  | 1.757204765 | 2.429490197 | 0.672285432  | 0.06277669 | 0.154147449 |
| Rhno1       | 66  | 0.917450006 | 1.298250715 | 0.380800708  | 0.06280351 | 0.154187497 |



|            |     |             |             |              |            |             |
|------------|-----|-------------|-------------|--------------|------------|-------------|
| Cdc20      | 60  | 1.721822889 | 1.534671027 | -0.187151862 | 0.06285358 | 0.154218912 |
| Comtd1     | 23  | 1.421955794 | 1.634261799 | 0.212306005  | 0.06284779 | 0.154218912 |
| Ntn5       | 3   | 42.79413857 | 38.23809524 | -4.556043331 | 0.06285834 | 0.154218912 |
| Phf10      | 47  | 1.063152752 | 0.875336331 | -0.187816421 | 0.06285118 | 0.154218912 |
| Glt28d2    | 28  | 1.680837485 | 2.163739638 | 0.482902154  | 0.06291192 | 0.154324566 |
| Tmem86a    | 52  | 1.373644653 | 1.34250586  | -0.031138793 | 0.06293102 | 0.15434561  |
| Rufy3      | 117 | 3.142737001 | 2.847730654 | -0.295006347 | 0.06298562 | 0.154408674 |
| Col8a2     | 34  | 14.54566728 | 16.46072668 | 1.915059402  | 0.06299985 | 0.154408674 |
| Cdc6       | 10  | 1.870498081 | 2.532124472 | 0.661626391  | 0.06296943 | 0.154408674 |
| Fzd2       | 2   | 0.729927007 | 2.482708409 | 1.752781402  | 0.06300935 | 0.154408674 |
| Gm10767    | 2   | 1.030927835 | 0           | -1.030927835 | 0.06299992 | 0.154408674 |
| '00123O20F | 32  | 1.169036428 | 1.468082098 | 0.29904567   | 0.06305427 | 0.154492962 |
| Stk40      | 37  | 1.674081067 | 1.756096553 | 0.082015486  | 0.06311856 | 0.154624656 |
| Psmg4      | 2   | 3.021978022 | 5.326202852 | 2.30422483   | 0.06316973 | 0.154724197 |
| Pla2g10os  | 1   | 48.63013699 | 38.18181818 | -10.4483188  | 0.06320706 | 0.154789788 |
| Gnai2      | 40  | 1.41327376  | 1.466162266 | 0.052888506  | 0.06334132 | 0.155092705 |
| Plk1       | 2   | 6.666666667 | 1.879699248 | -4.786967419 | 0.0635543  | 0.155558452 |
| Fam136a    | 51  | 0.901905831 | 1.054378198 | 0.152472367  | 0.06354238 | 0.155558452 |
| Stk11      | 64  | 0.884683338 | 0.967840982 | 0.083157645  | 0.06356334 | 0.155558452 |
| .30317F20R | 82  | 1.321711803 | 1.157236932 | -0.164474871 | 0.06357684 | 0.155565538 |
| .30050O18F | 2   | 65.27061856 | 72.77695278 | 7.50633422   | 0.06366561 | 0.15575679  |
| Myo5b      | 106 | 1.714482199 | 1.41906761  | -0.295414589 | 0.06373615 | 0.155903349 |
| '00025G04F | 49  | 1.97979332  | 1.228445338 | -0.751347981 | 0.06380366 | 0.156042497 |
| Kcnj5      | 3   | 10.02350843 | 8.819828572 | -1.203679859 | 0.06383868 | 0.156102112 |
| BC049730   | 1   | 57.33333333 | 41.79104478 | -15.54228856 | 0.06389277 | 0.156208337 |
| 130429B21F | 63  | 2.402838914 | 1.872039244 | -0.530799669 | 0.06409536 | 0.156677542 |
| Pgpep1     | 73  | 1.70474726  | 1.458782087 | -0.245965173 | 0.06414889 | 0.156777357 |
| Veph1      | 5   | 27.89424893 | 23.05789784 | -4.836351088 | 0.06415756 | 0.156777357 |
| Ncor2      | 104 | 1.04507603  | 0.877909313 | -0.167166717 | 0.06418093 | 0.156808358 |
| Capzb      | 54  | 1.706906683 | 1.416300903 | -0.29060578  | 0.06425964 | 0.156922267 |
| 130455D15F | 32  | 1.270501921 | 1.039238382 | -0.231263539 | 0.06425847 | 0.156922267 |
| Actr10     | 36  | 2.317483107 | 1.812395011 | -0.505088095 | 0.06424728 | 0.156922267 |
| lqgap3     | 16  | 1.557282721 | 1.040593238 | -0.516689483 | 0.06428743 | 0.156964009 |
| Zfp873     | 21  | 1.572429269 | 1.292274917 | -0.280154352 | 0.06433972 | 0.157065555 |

|            |     |             |             |              |            |             |
|------------|-----|-------------|-------------|--------------|------------|-------------|
| Dvl2       | 21  | 6.725110562 | 7.368354907 | 0.643244345  | 0.0644278  | 0.157254424 |
| Gnb1       | 12  | 1.962930381 | 1.019546821 | -0.94338356  | 0.06449092 | 0.15738229  |
| Rgs19      | 66  | 1.558803991 | 1.225286161 | -0.33351783  | 0.06451965 | 0.157426233 |
| Usp39      | 28  | 0.717338773 | 1.175650433 | 0.458311659  | 0.06453529 | 0.157438205 |
| Ccrl2      | 4   | 3.06851979  | 0.92361405  | -2.14490574  | 0.06457006 | 0.157444502 |
| }33407E24F | 1   | 44.73684211 | 60          | 15.26315789  | 0.0645675  | 0.157444502 |
| Ift20      | 37  | 1.157707502 | 0.976098926 | -0.181608576 | 0.06456422 | 0.157444502 |
| Prkab2     | 61  | 1.4136778   | 1.251790849 | -0.16188695  | 0.06464057 | 0.157491741 |
| Ngrn       | 22  | 0.788295373 | 0.90320763  | 0.114912257  | 0.06460737 | 0.157491741 |
| Mrpl2      | 34  | 2.327450578 | 1.692256732 | -0.635193846 | 0.06463309 | 0.157491741 |
| Zfp58      | 4   | 3.184842584 | 4.916219059 | 1.731376476  | 0.06463376 | 0.157491741 |
| Gtf2e1     | 41  | 1.842442627 | 1.604087709 | -0.238354917 | 0.06464309 | 0.157491741 |
| Dnah6      | 10  | 30.42976173 | 33.88072179 | 3.450960059  | 0.06474163 | 0.157705631 |
| Ppfia3     | 40  | 1.562533028 | 2.312188106 | 0.749655078  | 0.06479665 | 0.15781345  |
| Ppp1r3c    | 21  | 14.2038831  | 14.3554063  | 0.151523201  | 0.06481347 | 0.157828217 |
| Faah       | 73  | 1.519665714 | 1.58317459  | 0.063508876  | 0.06485918 | 0.157876943 |
| Prkcd      | 25  | 1.520344211 | 1.204358193 | -0.315986018 | 0.06486576 | 0.157876943 |
| Astn2      | 73  | 47.00627594 | 47.87937277 | 0.873096826  | 0.06486308 | 0.157876943 |
| Smim4      | 20  | 1.497214142 | 1.079332173 | -0.41788197  | 0.06496408 | 0.158090033 |
| Fbxo43     | 42  | 1.871841465 | 1.744042796 | -0.127798669 | 0.06497867 | 0.158099318 |
| Sumo3      | 82  | 0.986040828 | 1.038124163 | 0.052083335  | 0.06500991 | 0.15814912  |
| }10068J16R | 43  | 1.685672411 | 1.262533341 | -0.42313907  | 0.06511233 | 0.158372003 |
| Necap2     | 45  | 1.553082562 | 1.366670803 | -0.186411759 | 0.06512934 | 0.158387119 |
| Klhl38     | 4   | 32.80716439 | 36.54597758 | 3.738813192  | 0.06524708 | 0.158647165 |
| Fam46b     | 30  | 8.234114204 | 6.44818804  | -1.785926165 | 0.06528638 | 0.158716414 |
| Cct2       | 66  | 1.491884727 | 1.048616846 | -0.44326788  | 0.06533024 | 0.158796732 |
| Rpl15      | 39  | 1.995637432 | 1.368682958 | -0.626954474 | 0.06541877 | 0.158985601 |
| Zfp229     | 9   | 2.111176501 | 1.517963221 | -0.593213281 | 0.06552562 | 0.159218909 |
| Ptpn6      | 4   | 64.28424609 | 60.26676181 | -4.017484279 | 0.06562983 | 0.159445714 |
| Kcnh7      | 12  | 26.86480755 | 31.07891297 | 4.214105423  | 0.06568443 | 0.159538806 |
| Mpzl3      | 10  | 1.801584119 | 2.003073468 | 0.201489349  | 0.06568989 | 0.159538806 |
| Tap2       | 11  | 4.927360372 | 3.527116545 | -1.400243827 | 0.06574078 | 0.159635986 |
| Nacc1      | 61  | 1.094335031 | 1.231759746 | 0.137424715  | 0.06584277 | 0.159857171 |
| Ptprs      | 102 | 4.612049292 | 4.2061823   | -0.405866992 | 0.06586922 | 0.159894945 |

|            |    |             |             |              |            |             |
|------------|----|-------------|-------------|--------------|------------|-------------|
| Actr3      | 67 | 1.506179407 | 1.158098875 | -0.348080532 | 0.06600411 | 0.1601429   |
| '00001D01F | 2  | 49.97474747 | 40.45550847 | -9.519239    | 0.06599404 | 0.1601429   |
| Nek6       | 54 | 1.037711683 | 0.629926159 | -0.407785524 | 0.066003   | 0.1601429   |
| Gemin4     | 12 | 1.694588542 | 1.207064988 | -0.487523554 | 0.06608503 | 0.16028623  |
| Usp4       | 52 | 1.341910152 | 1.293098184 | -0.048811967 | 0.06608001 | 0.16028623  |
| Eif4g3     | 75 | 5.155064868 | 4.303910257 | -0.851154612 | 0.06623749 | 0.160629477 |
| Trappc8    | 77 | 1.548736116 | 1.008070801 | -0.540665316 | 0.06625649 | 0.160649004 |
| Rad54l2    | 62 | 1.476429394 | 1.625266615 | 0.148837221  | 0.06628149 | 0.16068306  |
| Lrrc58     | 78 | 1.001678795 | 0.771693078 | -0.229985717 | 0.06644334 | 0.160995634 |
| Tssc4      | 44 | 1.47616528  | 0.988096666 | -0.488068615 | 0.06644211 | 0.160995634 |
| Ddx49      | 10 | 1.62211595  | 1.53510667  | -0.087009279 | 0.06643423 | 0.160995634 |
| Ccni       | 32 | 0.645012435 | 0.747753957 | 0.102741521  | 0.06646793 | 0.161028625 |
| Gm15972    | 12 | 2.419638606 | 1.885682869 | -0.533955737 | 0.06648693 | 0.161048082 |
| Slc39a11   | 13 | 2.913122701 | 2.168220998 | -0.744901703 | 0.06652636 | 0.161115095 |
| Ddx39      | 55 | 1.272024205 | 1.513847102 | 0.241822897  | 0.06653656 | 0.161115095 |
| Pex26      | 4  | 3.459624952 | 2.400914634 | -1.058710318 | 0.06663306 | 0.161322148 |
| Tmem129    | 24 | 0.573097071 | 1.180837452 | 0.607740381  | 0.06667163 | 0.161388909 |
| Rnf13      | 22 | 1.520777043 | 1.439624697 | -0.081152347 | 0.06671062 | 0.161456651 |
| Rcbtb2     | 31 | 1.560623641 | 1.63263205  | 0.07200841   | 0.06689632 | 0.161879396 |
| Usp1       | 95 | 0.952374204 | 0.944045741 | -0.008328462 | 0.06706708 | 0.162265841 |
| Psme1      | 14 | 1.626913558 | 1.941618443 | 0.314704885  | 0.06710056 | 0.16232009  |
| Pax5       | 5  | 73.02325581 | 78.60869565 | 5.585439838  | 0.0671679  | 0.162456205 |
| Ppargc1b   | 63 | 1.386877034 | 1.760984631 | 0.374107597  | 0.0672563  | 0.162643204 |
| Sfmbt2     | 21 | 31.34681661 | 34.16876136 | 2.821944753  | 0.06734533 | 0.16283166  |
| Nup54      | 46 | 1.224988307 | 1.564240383 | 0.339252076  | 0.06737063 | 0.162865997 |
| Gm14634    | 2  | 13.5606455  | 8.205128205 | -5.355517292 | 0.06741702 | 0.162951294 |
| Ints3      | 31 | 1.043398845 | 1.512459591 | 0.469060746  | 0.06744137 | 0.162983301 |
| Plbd2      | 46 | 1.43059704  | 1.162382179 | -0.26821486  | 0.06748428 | 0.163060153 |
| Dennd6a    | 38 | 0.86700524  | 0.679764023 | -0.187241217 | 0.06752136 | 0.163096035 |
| P4ha2      | 55 | 1.975380635 | 1.556131639 | -0.419248996 | 0.06751666 | 0.163096035 |
| Dnajc27    | 14 | 0.993820388 | 1.616893156 | 0.623072768  | 0.06756537 | 0.163175494 |
| Rit1       | 11 | 1.609868286 | 2.554376379 | 0.944508093  | 0.06760583 | 0.163246324 |
| St7l       | 17 | 2.398626463 | 1.748078136 | -0.650548327 | 0.06764676 | 0.16331829  |
| Il17rb     | 25 | 8.569517983 | 9.384612877 | 0.815094894  | 0.06768153 | 0.163375355 |

|            |     |             |             |              |            |             |
|------------|-----|-------------|-------------|--------------|------------|-------------|
| Rab15      | 73  | 11.50486892 | 12.42425428 | 0.919385355  | 0.06772713 | 0.163458532 |
| Mir193a    | 123 | 1.525339802 | 1.213386497 | -0.311953305 | 0.06782336 | 0.163663879 |
| Vbp1       | 7   | 19.17500924 | 15.72380951 | -3.451199734 | 0.06787678 | 0.163765846 |
| Zfp710     | 83  | 2.265275691 | 1.868736229 | -0.396539462 | 0.06800947 | 0.16403508  |
| Ssh1       | 74  | 1.897948715 | 1.50577224  | -0.392176475 | 0.06801073 | 0.16403508  |
| Sh3tc1     | 4   | 2.895687875 | 1.798363459 | -1.097324416 | 0.06812434 | 0.164282091 |
| Rad54l     | 5   | 1.40775921  | 0.711046056 | -0.696713153 | 0.06816371 | 0.164296046 |
| i10003B16F | 5   | 1.40775921  | 0.711046056 | -0.696713153 | 0.06816371 | 0.164296046 |
| Hmgcr      | 48  | 1.004757558 | 0.861082896 | -0.143674662 | 0.06814759 | 0.164296046 |
| Zfp512     | 2   | 1.103061336 | 0           | -1.103061336 | 0.06820452 | 0.164367402 |
| Phospho2   | 11  | 1.076744386 | 1.850792762 | 0.774048375  | 0.06824589 | 0.16443307  |
| Eif5       | 74  | 6.422533442 | 5.276364859 | -1.146168584 | 0.06825418 | 0.16443307  |
| Glyctk     | 3   | 92.64014389 | 91.15817579 | -1.481968101 | 0.06829691 | 0.164509017 |
| Psmc3ip    | 34  | 2.593660781 | 1.971328329 | -0.622332452 | 0.06842635 | 0.164793748 |
| Slc12a9    | 25  | 1.398989682 | 1.726643694 | 0.327654012  | 0.06844791 | 0.164818605 |
| Micall2    | 44  | 1.986076529 | 1.47967114  | -0.50640539  | 0.06848164 | 0.164872787 |
| Tmem147    | 44  | 1.386971017 | 0.825274674 | -0.561696344 | 0.06856187 | 0.165038847 |
| Rictor     | 122 | 1.09837471  | 1.309266723 | 0.210892013  | 0.06859077 | 0.165081342 |
| Mmp14      | 7   | 1.932619566 | 1.065459166 | -0.867160401 | 0.06861201 | 0.165105376 |
| Taf15      | 55  | 2.625130716 | 1.706968442 | -0.918162274 | 0.068735   | 0.165374221 |
| Raly       | 55  | 1.921725958 | 1.938826433 | 0.017100475  | 0.06876393 | 0.165416695 |
| Cops7a     | 58  | 1.2195222   | 1.569799684 | 0.350277484  | 0.06882547 | 0.165537617 |
| Gng12      | 77  | 1.343918762 | 1.406740678 | 0.062821916  | 0.0688562  | 0.16558437  |
| Ctcf1      | 3   | 89.18761482 | 89.2817475  | 0.094132678  | 0.06889573 | 0.165652287 |
| Per2       | 69  | 0.946784827 | 0.929781154 | -0.017003672 | 0.06892862 | 0.165704233 |
| St3gal6    | 26  | 2.344924356 | 1.997470319 | -0.347454037 | 0.06905697 | 0.165985577 |
| Sgpp2      | 28  | 6.521273933 | 7.50379423  | 0.982520296  | 0.06936249 | 0.166675426 |
| Mettl13    | 27  | 1.612385909 | 1.250282835 | -0.362103074 | 0.06936669 | 0.166675426 |
| Tmem114    | 22  | 12.60868662 | 12.53583967 | -0.072846953 | 0.06945389 | 0.166857626 |
| Fam163b    | 29  | 21.91798491 | 23.56801669 | 1.650031778  | 0.06954513 | 0.167028231 |
| Sipa1l1    | 130 | 1.281359453 | 1.429888069 | 0.148528615  | 0.06954767 | 0.167028231 |
| Lsg1       | 15  | 1.956550781 | 0.964857655 | -0.991693126 | 0.06958373 | 0.167087482 |
| Ppil4      | 35  | 1.232624843 | 1.129527132 | -0.103097711 | 0.06962688 | 0.167163748 |
| Tada3      | 17  | 1.719389354 | 1.22346063  | -0.495928724 | 0.06965313 | 0.167199418 |

|            |    |             |             |              |            |             |
|------------|----|-------------|-------------|--------------|------------|-------------|
| Plcd3      | 31 | 3.110965347 | 2.705073514 | -0.405891833 | 0.06973082 | 0.167358528 |
| Mcph1      | 54 | 1.265340858 | 0.942302054 | -0.323038803 | 0.06976151 | 0.167404814 |
| Tmem184b   | 81 | 1.302951173 | 1.214846125 | -0.088105048 | 0.06978477 | 0.16743325  |
| Igsf23     | 4  | 48          | 54.30088014 | 6.300880138  | 0.06989757 | 0.167676477 |
| Gm2762     | 2  | 83.87115296 | 75.13209323 | -8.739059738 | 0.06993182 | 0.167703787 |
| Spop       | 36 | 0.995927105 | 1.299916311 | 0.303989207  | 0.06992318 | 0.167703787 |
| Alkbh3     | 27 | 2.074899058 | 1.868834341 | -0.206064716 | 0.06999357 | 0.167780937 |
| 330404I05R | 11 | 1.668935066 | 0.971858063 | -0.697077003 | 0.0699827  | 0.167780937 |
| Ppp1r14a   | 43 | 4.618394327 | 4.549588431 | -0.068805896 | 0.06999829 | 0.167780937 |
| Slc31a2    | 24 | 1.958452312 | 1.578913709 | -0.379538604 | 0.07001569 | 0.167795238 |
| Asrgl1     | 7  | 0.360144058 | 1.086956522 | 0.726812464  | 0.07022853 | 0.168266441 |
| Cwc27      | 10 | 1.47047915  | 0.99510034  | -0.47537881  | 0.07023524 | 0.168266441 |
| Mroh2b     | 1  | 74.57627119 | 58.49056604 | -16.08570515 | 0.07032099 | 0.168444366 |
| Cmpk2      | 20 | 2.562074286 | 1.727881051 | -0.834193235 | 0.07035035 | 0.168487194 |
| Eif2b2     | 39 | 1.628371259 | 1.057767676 | -0.570603583 | 0.07055318 | 0.168945388 |
| Dnajc9     | 33 | 1.386314389 | 0.976191561 | -0.410122828 | 0.07064177 | 0.169129926 |
| Gm14295    | 3  | 12.79669763 | 15.49974033 | 2.703042707  | 0.07085781 | 0.169619506 |
| Npm2       | 2  | 82.7688172  | 73.28767123 | -9.481145971 | 0.07092507 | 0.169752818 |
| Ttbk2      | 53 | 1.476620645 | 1.152614721 | -0.324005924 | 0.0710022  | 0.169909711 |
| Mdm1       | 54 | 1.44301653  | 1.739538998 | 0.296522468  | 0.0710153  | 0.169913332 |
| Lzic       | 45 | 1.250808471 | 1.50742307  | 0.256614599  | 0.07106732 | 0.170010094 |
| Sdc3       | 89 | 1.783644563 | 1.581372749 | -0.202271814 | 0.07111293 | 0.170091473 |
| Dpagt1     | 15 | 1.308688611 | 1.50778882  | 0.199100209  | 0.07114339 | 0.170136595 |
| Fam172a    | 26 | 1.333396936 | 0.806587602 | -0.526809333 | 0.0711745  | 0.170183257 |
| Rptn       | 1  | 98.0952381  | 93.58974359 | -4.505494505 | 0.07119732 | 0.170190338 |
| Lsm4       | 12 | 2.664640038 | 1.910762157 | -0.753877881 | 0.07120066 | 0.170190338 |
| Cited2     | 65 | 1.551313268 | 1.655443179 | 0.104129911  | 0.07124095 | 0.170258902 |
| Fam135b    | 8  | 58.68068455 | 54.51843768 | -4.162246863 | 0.07133927 | 0.170466128 |
| Ppp4c      | 45 | 1.278327267 | 1.015415302 | -0.262911965 | 0.07149726 | 0.170815816 |
| Tpm4       | 24 | 0.751973606 | 0.677356947 | -0.07461666  | 0.07153727 | 0.170883584 |
| Rbbp9      | 10 | 2.688994406 | 1.952081313 | -0.736913093 | 0.07158021 | 0.17095833  |
| Cdk12      | 31 | 1.13653629  | 0.935218824 | -0.201317466 | 0.07163149 | 0.171052974 |
| Ubp1       | 29 | 1.387264999 | 1.440948522 | 0.053683523  | 0.07164434 | 0.171055823 |
| Plcg1      | 95 | 1.095294337 | 1.088996846 | -0.006297491 | 0.07179646 | 0.171391117 |

|            |    |             |             |              |            |             |
|------------|----|-------------|-------------|--------------|------------|-------------|
| Syncrip    | 96 | 1.750176405 | 1.320236448 | -0.429939956 | 0.07182442 | 0.171418739 |
| Mob3c      | 24 | 1.397219918 | 0.964827965 | -0.432391954 | 0.07183139 | 0.171418739 |
| Uqcc2      | 5  | 1.271787849 | 1.821507639 | 0.54971979   | 0.07190291 | 0.171561524 |
| Rps17      | 39 | 0.818182912 | 1.023947733 | 0.205764822  | 0.07193838 | 0.171618243 |
| Tmie       | 2  | 10.48458841 | 7.103068172 | -3.381520242 | 0.07208912 | 0.17194989  |
| Klhdc4     | 38 | 2.873277845 | 1.873500348 | -0.999777497 | 0.07215747 | 0.172056987 |
| Mir7075    | 19 | 2.078728974 | 1.542439914 | -0.53628906  | 0.07215374 | 0.172056987 |
| Mir6945    | 28 | 96.93501632 | 95.94453519 | -0.990481136 | 0.07225872 | 0.172270426 |
| Kcnab3     | 13 | 3.754118097 | 3.132639647 | -0.62147845  | 0.07230857 | 0.172361268 |
| Hspa1b     | 5  | 1.794871795 | 0.487804878 | -1.307066917 | 0.0724     | 0.17253256  |
| Cdk2ap1    | 57 | 1.011484421 | 1.020837483 | 0.009353062  | 0.07240395 | 0.17253256  |
| L10038F14F | 44 | 2.104689355 | 2.00322295  | -0.101466404 | 0.07245303 | 0.172611388 |
| Ncbp2      | 29 | 1.40539829  | 0.84800619  | -0.5573921   | 0.07246055 | 0.172611388 |
| Cirh1a     | 18 | 0.7835554   | 1.490731674 | 0.707176274  | 0.07251347 | 0.172709408 |
| Ppa1       | 52 | 1.13266327  | 1.456100649 | 0.323437379  | 0.07252711 | 0.172713849 |
| Mir8099-1  | 3  | 87.35689262 | 81.16500332 | -6.191889299 | 0.07262658 | 0.172894614 |
| Mir8099-2  | 3  | 87.35689262 | 81.16500332 | -6.191889299 | 0.07262658 | 0.172894614 |
| Arfgap2    | 72 | 1.129941835 | 1.502255764 | 0.372313929  | 0.07267669 | 0.172985848 |
| Tmem74     | 11 | 22.80323807 | 21.28698095 | -1.516257124 | 0.07272723 | 0.17307807  |
| Foxa3      | 51 | 5.551953134 | 6.251986159 | 0.700033025  | 0.07278959 | 0.173198025 |
| Pttg1      | 13 | 14.34262509 | 8.037643296 | -6.304981793 | 0.07280124 | 0.173198025 |
| Fa2h       | 69 | 2.386387307 | 2.117550423 | -0.268836884 | 0.07287236 | 0.173339109 |
| Calm3      | 48 | 1.575087471 | 1.180544749 | -0.394542721 | 0.07298472 | 0.173554623 |
| Zbtb42     | 86 | 3.578494157 | 3.131341853 | -0.447152304 | 0.07299844 | 0.173554623 |
| .10020A21F | 1  | 4.519774011 | 1.470588235 | -3.049185776 | 0.07299661 | 0.173554623 |
| Mrps34     | 22 | 1.204080875 | 0.866654924 | -0.337425951 | 0.07301765 | 0.173572172 |
| Exog       | 39 | 1.174137644 | 0.854724296 | -0.319413348 | 0.07305135 | 0.173624146 |
| Camk2d     | 85 | 1.504403437 | 1.164359355 | -0.340044081 | 0.07307158 | 0.173644111 |
| Bre        | 39 | 0.782244735 | 0.950282759 | 0.168038025  | 0.0732623  | 0.174069146 |
| 430020J02F | 1  | 7.917888563 | 4.624277457 | -3.293611106 | 0.07333979 | 0.174225046 |
| Adam10     | 82 | 1.28416406  | 1.074187373 | -0.209976687 | 0.07338552 | 0.174305452 |
| Rnf135     | 24 | 1.358637968 | 0.702413017 | -0.656224951 | 0.07361979 | 0.174833588 |
| Gpr146     | 62 | 1.376106849 | 1.637768117 | 0.261661268  | 0.07364274 | 0.174859806 |
| Cdc37      | 22 | 1.379255951 | 1.44587221  | 0.066616258  | 0.07366109 | 0.174875083 |

|            |     |             |             |              |            |             |
|------------|-----|-------------|-------------|--------------|------------|-------------|
| Slc52a3    | 8   | 42.79739603 | 38.61541756 | -4.181978461 | 0.07368175 | 0.174895833 |
| AW822252   | 2   | 72.50990379 | 66.80556731 | -5.704336485 | 0.07371506 | 0.174946586 |
| Dhx37      | 51  | 1.940052352 | 2.329361186 | 0.389308834  | 0.07372787 | 0.174948693 |
| Fabp5      | 10  | 4.189137263 | 3.607079501 | -0.582057762 | 0.07380793 | 0.17511035  |
| Mapk1      | 45  | 1.232382994 | 0.919151579 | -0.313231414 | 0.07389598 | 0.175290926 |
| Trrap      | 70  | 1.224564755 | 1.004662603 | -0.219902152 | 0.07423661 | 0.17607047  |
| Ift43      | 30  | 1.664550807 | 1.833781824 | 0.169231017  | 0.07428628 | 0.176131331 |
| AA465934   | 13  | 0.655677912 | 1.545587198 | 0.889909285  | 0.07428023 | 0.176131331 |
| Sytl4      | 4   | 13.21790293 | 9.064289433 | -4.1536135   | 0.07432388 | 0.17619203  |
| Ttll11     | 140 | 1.052663634 | 1.229203572 | 0.176539938  | 0.07437162 | 0.176276709 |
| Mrps18c    | 3   | 1.268742791 | 1.856349513 | 0.587606722  | 0.07443033 | 0.176364568 |
| Polr3d     | 24  | 1.089862018 | 0.7546199   | -0.335242119 | 0.07443272 | 0.176364568 |
| Capn5      | 24  | 6.335173126 | 4.73149743  | -1.603675696 | 0.07448453 | 0.17645882  |
| Ift27      | 24  | 2.130903508 | 1.35905514  | -0.771848367 | 0.07453424 | 0.176548087 |
| Blvrb      | 14  | 21.22191681 | 19.77055835 | -1.451358451 | 0.07455989 | 0.176580345 |
| 700028E10F | 29  | 1.038967699 | 1.37575563  | 0.33678793   | 0.07467633 | 0.17682758  |
| Gne        | 44  | 1.226185188 | 1.508249327 | 0.282064139  | 0.07478166 | 0.177048407 |
| Lef1       | 79  | 15.58329807 | 15.44106503 | -0.142233042 | 0.07486884 | 0.17718702  |
| Krtcap2    | 26  | 2.207644505 | 1.720628982 | -0.487015523 | 0.07486307 | 0.17718702  |
| Peo1       | 10  | 1.01712973  | 0.52685122  | -0.49027851  | 0.07487643 | 0.17718702  |
| Rnf14      | 54  | 1.680873901 | 1.403137582 | -0.277736319 | 0.07505833 | 0.177560192 |
| Nme7       | 4   | 0.577641862 | 0.105042017 | -0.472599845 | 0.07504902 | 0.177560192 |
| Degs2      | 8   | 12.66435655 | 15.53641633 | 2.872059775  | 0.07507738 | 0.177576634 |
| Mettl16    | 11  | 2.775261228 | 1.898362913 | -0.876898315 | 0.07515687 | 0.177735996 |
| i00011B03F | 10  | 3.180514985 | 4.877400404 | 1.696885419  | 0.07527618 | 0.177989471 |
| Zfp398     | 69  | 1.305536755 | 1.139823381 | -0.165713374 | 0.07540071 | 0.178255196 |
| Evx2       | 3   | 47.96645702 | 41.74461799 | -6.221839028 | 0.07542693 | 0.178265947 |
| Kdm3a      | 2   | 1.041666667 | 2.822580645 | 1.780913978  | 0.07542955 | 0.178265947 |
| Timm22     | 15  | 1.547445109 | 1.081520279 | -0.46592483  | 0.07548319 | 0.178335264 |
| Kcng3      | 178 | 8.959434939 | 9.753345111 | 0.793910171  | 0.07548083 | 0.178335264 |
| Olf151     | 1   | 89.13043478 | 75.86206897 | -13.26836582 | 0.07559754 | 0.178576686 |
| Sgol1      | 51  | 1.579887682 | 1.135411002 | -0.44447668  | 0.07570911 | 0.178811436 |
| Slmo2      | 64  | 1.497616416 | 1.220183498 | -0.277432918 | 0.07572936 | 0.178830481 |
| Ccnt1      | 55  | 1.323584259 | 1.166387567 | -0.157196691 | 0.07575758 | 0.17886835  |

|            |     |             |             |              |            |             |
|------------|-----|-------------|-------------|--------------|------------|-------------|
| Med6       | 11  | 2.1228431   | 1.559568631 | -0.563274468 | 0.07577462 | 0.17887978  |
| Usp34      | 117 | 1.495339982 | 1.293567805 | -0.201772177 | 0.07591727 | 0.179158887 |
| Alox12b    | 15  | 30.41704429 | 32.4187882  | 2.001743909  | 0.0759052  | 0.179158887 |
| Slc39a4    | 8   | 14.40654644 | 12.02101927 | -2.385527174 | 0.07598227 | 0.179283457 |
| Zfp617     | 34  | 1.414514156 | 1.219122512 | -0.195391645 | 0.07600844 | 0.179316366 |
| Dhps       | 42  | 1.292913163 | 1.344008069 | 0.051094906  | 0.07609332 | 0.179487775 |
| Lrrk2      | 25  | 1.392795001 | 0.871551468 | -0.521243534 | 0.0762608  | 0.179853909 |
| Mospd2     | 2   | 25.43673012 | 18.32868184 | -7.108048285 | 0.07639152 | 0.180104302 |
| Cnot2      | 72  | 1.08773901  | 1.095917573 | 0.008178563  | 0.0763873  | 0.180104302 |
| Pxk        | 38  | 1.475619408 | 0.999539091 | -0.476080317 | 0.07647441 | 0.180270756 |
| Slc6a4     | 38  | 3.537581875 | 2.902467245 | -0.63511463  | 0.07654037 | 0.180397262 |
| Tamm41     | 31  | 1.190396909 | 0.739980736 | -0.450416173 | 0.07656169 | 0.180418539 |
| Prpf40b    | 58  | 1.588573386 | 1.708324247 | 0.119750861  | 0.07657436 | 0.180419426 |
| Wsb1       | 39  | 1.883899714 | 1.575841734 | -0.30805798  | 0.07671293 | 0.180716883 |
| Parpbp     | 18  | 1.289432517 | 0.859319598 | -0.430112919 | 0.07681831 | 0.180936103 |
| Fam92a     | 58  | 2.063957777 | 1.613778745 | -0.450179032 | 0.07686214 | 0.181010283 |
| Nop14      | 8   | 2.477997587 | 1.893732741 | -0.584264846 | 0.07698215 | 0.181263802 |
| Tnpo1      | 121 | 1.062075301 | 0.763665275 | -0.298410025 | 0.07716834 | 0.181673068 |
| Syng2      | 34  | 0.659165594 | 1.448642534 | 0.78947694   | 0.07719897 | 0.181716024 |
| Crnde      | 65  | 1.682930686 | 1.38123837  | -0.301692316 | 0.07723915 | 0.181781432 |
| Dot1l      | 98  | 0.978002861 | 1.215638443 | 0.237635581  | 0.07734169 | 0.181993572 |
| Adam6a     | 3   | 96.42857143 | 92.52434904 | -3.904222393 | 0.0774579  | 0.182237822 |
| '30455P16F | 15  | 1.905409758 | 2.373173684 | 0.467763926  | 0.07748833 | 0.182280179 |
| Rbm15      | 32  | 1.610044287 | 1.077584445 | -0.532459842 | 0.07764827 | 0.182627138 |
| Htt        | 7   | 2.68898995  | 0.908967576 | -1.780022374 | 0.07767358 | 0.182657379 |
| 700049E22F | 4   | 36.20017656 | 32.84628064 | -3.353895923 | 0.07769329 | 0.18267446  |
| Pex19      | 2   | 2.216066482 | 2.864663422 | 0.64859694   | 0.07776979 | 0.182825049 |
| Trim36     | 107 | 11.51307655 | 12.04131331 | 0.528236757  | 0.0777867  | 0.182835497 |
| Cyb561d1   | 31  | 1.466917119 | 1.889892898 | 0.422975779  | 0.07799776 | 0.183302238 |
| Papd4      | 43  | 1.544441262 | 1.065102488 | -0.479338774 | 0.07809314 | 0.183496989 |
| Slit2      | 39  | 1.558884989 | 0.999616549 | -0.55926844  | 0.07814161 | 0.183581493 |
| Caskin2    | 32  | 2.561396611 | 2.256351838 | -0.305044773 | 0.0781727  | 0.183625139 |
| Kat7       | 41  | 1.094874427 | 0.897410577 | -0.19746385  | 0.07821681 | 0.183669938 |
| Dtd2       | 9   | 0.661234191 | 1.149626949 | 0.488392759  | 0.07821348 | 0.183669938 |



|           |     |             |             |              |            |             |
|-----------|-----|-------------|-------------|--------------|------------|-------------|
| Rpl7      | 74  | 1.174336282 | 1.380859212 | 0.206522931  | 0.07827073 | 0.183737752 |
| Sec24d    | 36  | 0.702072572 | 0.956085823 | 0.254013251  | 0.07826255 | 0.183737752 |
| Adam17    | 33  | 1.40521302  | 1.29448662  | -0.1107264   | 0.07838517 | 0.183976976 |
| Cds2      | 49  | 1.160014054 | 1.394944887 | 0.234930833  | 0.07848285 | 0.184176772 |
| Baz1a     | 48  | 1.386104159 | 1.257714099 | -0.12839006  | 0.07851034 | 0.184182367 |
| Acp2      | 14  | 2.229820732 | 2.963524734 | 0.733704002  | 0.07850912 | 0.184182367 |
| Psmc12    | 12  | 1.414013262 | 1.059700219 | -0.354313043 | 0.07853672 | 0.184214817 |
| Matn4     | 1   | 46.90721649 | 55.37190083 | 8.464684332  | 0.07868236 | 0.184526915 |
| 10062018F | 81  | 1.380690342 | 1.111459298 | -0.269231044 | 0.07875879 | 0.18467664  |
| Galk2     | 5   | 2.819168872 | 1.146403797 | -1.672765075 | 0.07893029 | 0.18504921  |
| Fus       | 37  | 1.709075495 | 2.024881343 | 0.315805848  | 0.07897488 | 0.185124195 |
| D17H6S53E | 11  | 1.509412395 | 1.430074901 | -0.079337494 | 0.07904848 | 0.185267121 |
| Mrpl48    | 102 | 1.456433955 | 1.293068531 | -0.163365424 | 0.0791496  | 0.185474487 |
| Serpina3n | 2   | 12.01332637 | 21.15211521 | 9.138788846  | 0.07937195 | 0.185936144 |
| Tgs1      | 31  | 1.551635475 | 1.162730097 | -0.388905378 | 0.07936848 | 0.185936144 |
| Haus4     | 32  | 1.303174383 | 0.860672885 | -0.442501498 | 0.07940352 | 0.185959975 |
| Ccdc85c   | 129 | 1.529181012 | 1.478641624 | -0.050539388 | 0.07940747 | 0.185959975 |
| Tfap2b    | 1   | 23.17073171 | 17.30205279 | -5.868678921 | 0.07944853 | 0.186026452 |
| Rab26os   | 2   | 4.355769231 | 3.873239437 | -0.482529794 | 0.07948113 | 0.18607308  |
| Agpat1    | 35  | 1.964636302 | 1.421982978 | -0.542653324 | 0.07952901 | 0.186155484 |
| Slc12a6   | 64  | 1.333565314 | 1.124496998 | -0.209068316 | 0.07962445 | 0.186349148 |
| Ppp1r3g   | 2   | 45.08547009 | 48.72532895 | 3.639858862  | 0.07975159 | 0.186616932 |
| Tars2     | 13  | 2.266000127 | 1.489835127 | -0.776164999 | 0.07990269 | 0.186910891 |
| Zfp317    | 10  | 0.507469312 | 1.291796575 | 0.784327263  | 0.07989124 | 0.186910891 |
| 10003K11F | 4   | 45.65363026 | 40.08837644 | -5.565253811 | 0.08003854 | 0.187198833 |
| Rce1      | 102 | 1.419559546 | 1.076846414 | -0.342713132 | 0.08016372 | 0.187461734 |
| Polr3b    | 39  | 1.534040181 | 1.344103942 | -0.189936239 | 0.08026922 | 0.187678553 |
| Rnps1     | 32  | 1.181484861 | 0.855507518 | -0.325977343 | 0.08028487 | 0.187685224 |
| Apeh      | 51  | 1.823437353 | 1.675880246 | -0.147557107 | 0.08040493 | 0.187935957 |
| Srr       | 11  | 0.316539521 | 0.845321993 | 0.528782472  | 0.08045728 | 0.188028376 |
| Murc      | 6   | 79.7262759  | 81.56826775 | 1.841991852  | 0.08051584 | 0.188135267 |
| Irf1      | 64  | 1.032875981 | 0.809977407 | -0.222898575 | 0.08056189 | 0.188212882 |
| Hist1h1a  | 11  | 8.541306745 | 7.574136232 | -0.967170513 | 0.08062194 | 0.188285561 |
| Dnaic2    | 3   | 29.44514121 | 25.19254128 | -4.25259993  | 0.08062417 | 0.188285561 |

|            |     |             |             |              |            |             |
|------------|-----|-------------|-------------|--------------|------------|-------------|
| Pkd1       | 36  | 1.110088016 | 0.870687202 | -0.239400814 | 0.08063149 | 0.188285561 |
| Ttpal      | 36  | 30.82295824 | 30.47615097 | -0.346807273 | 0.08074338 | 0.188516848 |
| Serinc3    | 40  | 1.283325197 | 1.087727875 | -0.195597322 | 0.08084693 | 0.188698554 |
| Atf6       | 17  | 1.34936668  | 1.835154731 | 0.485788051  | 0.08084527 | 0.188698554 |
| Mir7034    | 12  | 95.59545566 | 94.74560846 | -0.849847195 | 0.08096662 | 0.188947857 |
| Dnajc21    | 83  | 2.383011931 | 2.27865031  | -0.104361621 | 0.08105258 | 0.189006777 |
| Psmg2      | 67  | 1.478876726 | 1.227331932 | -0.251544794 | 0.08105627 | 0.189006777 |
| Shisa5     | 25  | 1.825439326 | 1.224781288 | -0.600658037 | 0.08103455 | 0.189006777 |
| Cbfa2t2    | 49  | 1.392069914 | 0.880250666 | -0.511819248 | 0.08102208 | 0.189006777 |
| H10006H16F | 1   | 3.947368421 | 11.86440678 | 7.917038359  | 0.08103557 | 0.189006777 |
| Lpcat3     | 66  | 1.720906314 | 1.25559099  | -0.465315324 | 0.0812514  | 0.189431699 |
| Wbp11      | 54  | 1.466014737 | 1.283410512 | -0.182604225 | 0.08129174 | 0.189495625 |
| Ndrg4      | 15  | 6.204841695 | 4.955814954 | -1.249026741 | 0.0813965  | 0.189685203 |
| Crtc1      | 36  | 1.711587558 | 1.659029423 | -0.052558135 | 0.08139892 | 0.189685203 |
| Cd2ap      | 62  | 1.100741054 | 0.913185237 | -0.187555817 | 0.08142953 | 0.189726414 |
| Gpr132     | 4   | 58.23820735 | 62.89458803 | 4.656380684  | 0.08155153 | 0.189980509 |
| Ddx51      | 33  | 0.996332686 | 1.039709303 | 0.043376617  | 0.08188296 | 0.190722319 |
| Bysl       | 18  | 1.388979129 | 1.506912874 | 0.117933745  | 0.0819903  | 0.190911709 |
| Elovl7     | 59  | 1.669439419 | 1.407876012 | -0.261563406 | 0.08197939 | 0.190911709 |
| Pdk2       | 34  | 1.503788129 | 1.443662003 | -0.060126127 | 0.08213601 | 0.19122067  |
| Ost4       | 37  | 1.244073776 | 0.820330375 | -0.423743401 | 0.08222046 | 0.191386906 |
| H30319G15F | 43  | 1.491128866 | 1.915840408 | 0.424711543  | 0.08231423 | 0.191549856 |
| Kdelc1     | 1   | 3.181818182 | 1.030927835 | -2.150890347 | 0.08231657 | 0.191549856 |
| Gm10069    | 7   | 2.857411439 | 4.483167607 | 1.625756168  | 0.08238953 | 0.191689219 |
| Son        | 51  | 1.218214258 | 0.931407784 | -0.286806473 | 0.08243662 | 0.191768375 |
| Tuba1a     | 18  | 0.870724505 | 1.020246143 | 0.149521638  | 0.08258853 | 0.192091314 |
| Phf2       | 188 | 1.366294038 | 1.213208838 | -0.1530852   | 0.08262581 | 0.192147574 |
| Pcdhgb2    | 5   | 65.08301313 | 59.49556317 | -5.587449962 | 0.08272671 | 0.192321245 |
| Lrtm1      | 4   | 89.6355472  | 86.38636    | -3.2491872   | 0.08271865 | 0.192321245 |
| Tcf12      | 178 | 1.056189636 | 1.104693502 | 0.048503865  | 0.08275579 | 0.192358378 |
| Ccdc66     | 18  | 1.39059172  | 1.813487778 | 0.422896058  | 0.08284231 | 0.192528994 |
| Dennd5b    | 67  | 3.112961661 | 3.249408738 | 0.136447077  | 0.08287323 | 0.19257035  |
| Sycp3      | 28  | 92.70145046 | 90.91304543 | -1.788405029 | 0.08296899 | 0.192762347 |
| Chrdl1     | 12  | 31.27275625 | 36.46735225 | 5.194596004  | 0.08324683 | 0.193377235 |

|            |     |             |             |              |            |             |
|------------|-----|-------------|-------------|--------------|------------|-------------|
| Plekha7    | 73  | 1.370776711 | 1.501316378 | 0.130539667  | 0.08332946 | 0.193538551 |
| C2cd2      | 48  | 1.056323039 | 1.239608943 | 0.183285905  | 0.08356255 | 0.194049197 |
| Clpb       | 31  | 1.3665711   | 1.082273219 | -0.284297881 | 0.08382989 | 0.194639206 |
| Gp1bb      | 4   | 48.87755102 | 49.38763621 | 0.51008519   | 0.08392027 | 0.194818238 |
| Hspg2      | 31  | 2.354540437 | 2.664390554 | 0.309850117  | 0.08400265 | 0.194978631 |
| Mcm4       | 34  | 1.398669386 | 1.114419146 | -0.28425024  | 0.0841098  | 0.195165591 |
| 510010F05F | 103 | 1.137015827 | 1.213641798 | 0.076625971  | 0.08409951 | 0.195165591 |
| Atxn3      | 15  | 1.392997305 | 0.731539802 | -0.661457503 | 0.0842279  | 0.195408732 |
| Pcdh7      | 24  | 55.54875907 | 54.21838546 | -1.33037361  | 0.08424473 | 0.195416878 |
| Dock11     | 52  | 13.97628691 | 13.27767402 | -0.69861289  | 0.08431077 | 0.195539156 |
| Mtm1       | 5   | 19.90908724 | 16.55644286 | -3.35264438  | 0.08443127 | 0.195739781 |
| Calhm2     | 7   | 58.78844706 | 55.79538435 | -2.993062711 | 0.08442503 | 0.195739781 |
| Tmem259    | 80  | 1.165735052 | 1.133094688 | -0.032640364 | 0.08443729 | 0.195739781 |
| Exoc3      | 2   | 2.272727273 | 0           | -2.272727273 | 0.08446204 | 0.195766226 |
| Isoc2a     | 5   | 1.30914974  | 1.989285086 | 0.680135346  | 0.08447651 | 0.195768849 |
| Map4k2     | 56  | 1.064837362 | 1.090380252 | 0.02554289   | 0.08452401 | 0.195817082 |
| Slc5a3     | 35  | 1.610090436 | 1.758516752 | 0.148426316  | 0.08452265 | 0.195817082 |
| Gm561      | 16  | 1.667716526 | 1.202998717 | -0.464717809 | 0.08457929 | 0.195914208 |
| Chmp6      | 34  | 2.789587159 | 2.285667994 | -0.503919165 | 0.08469933 | 0.196161301 |
| Cwf19l2    | 1   | 0           | 1.063829787 | 1.063829787  | 0.08477894 | 0.196314682 |
| Ambra1     | 22  | 0.697299977 | 0.9444824   | 0.247182423  | 0.08494038 | 0.196657482 |
| Kdm7a      | 112 | 1.024497665 | 0.834690975 | -0.18980669  | 0.08507547 | 0.196924979 |
| Adgrg6     | 95  | 1.952795413 | 1.828514249 | -0.124281164 | 0.08508276 | 0.196924979 |
| Lrrc16b    | 60  | 2.134685625 | 2.16646043  | 0.031774805  | 0.08512601 | 0.196994013 |
| Erc8       | 23  | 1.241713967 | 1.6552733   | 0.413559333  | 0.08521004 | 0.197157389 |
| Ntn3       | 50  | 14.04529999 | 15.75327956 | 1.707979567  | 0.08531979 | 0.197380205 |
| Slc25a30   | 52  | 1.478660209 | 1.39414378  | -0.084516429 | 0.08540681 | 0.197550363 |
| Hmces      | 35  | 0.981685069 | 0.873716787 | -0.107968282 | 0.08550398 | 0.197743957 |
| Cmtm4      | 73  | 1.439024599 | 1.216425424 | -0.222599175 | 0.08587337 | 0.198536563 |
| Exosc8     | 89  | 1.329096617 | 1.179718879 | -0.149377738 | 0.08587376 | 0.198536563 |
| Suclg1     | 25  | 2.565128811 | 2.243983302 | -0.321145509 | 0.08594253 | 0.19866425  |
| Mid1       | 18  | 17.17272505 | 14.58830394 | -2.584421107 | 0.08597259 | 0.198702433 |
| Atp13a1    | 59  | 1.102645405 | 1.191279773 | 0.088634368  | 0.08603084 | 0.198805752 |
| Ankrd24    | 3   | 5.497325916 | 9.294278863 | 3.796952947  | 0.08609803 | 0.198929692 |

|            |     |             |             |              |            |             |
|------------|-----|-------------|-------------|--------------|------------|-------------|
| Dhrs4      | 1   | 7.777777778 | 1.724137931 | -6.053639847 | 0.08614969 | 0.199017716 |
| !10041H14F | 38  | 2.210184996 | 1.589802372 | -0.620382624 | 0.08620089 | 0.199042003 |
| H19        | 7   | 47.85801837 | 51.95638915 | 4.09837078   | 0.08618191 | 0.199042003 |
| Atp6v1f    | 18  | 2.609923938 | 1.790464115 | -0.819459823 | 0.08619211 | 0.199042003 |
| Sv2b       | 18  | 25.79956787 | 27.83312069 | 2.033552827  | 0.0863124  | 0.199268126 |
| Apc        | 79  | 1.514520663 | 1.306640993 | -0.20787967  | 0.08640645 | 0.199453862 |
| !30219D22F | 66  | 0.943991618 | 0.999137664 | 0.055146046  | 0.08646688 | 0.199530592 |
| Amer2      | 27  | 13.89302496 | 21.40463781 | 7.511612843  | 0.08645456 | 0.199530592 |
| Foxp4      | 66  | 0.907162256 | 0.935707324 | 0.028545068  | 0.08648068 | 0.199531064 |
| Slc47a2    | 35  | 10.72085816 | 10.62984007 | -0.091018091 | 0.08660377 | 0.199783646 |
| Sigmar1    | 15  | 1.046559086 | 1.544969316 | 0.498410229  | 0.08665141 | 0.199862125 |
| Tm7sf2     | 8   | 1.491956736 | 0.558862233 | -0.933094503 | 0.08668137 | 0.199899792 |
| Ppp2r1b    | 42  | 1.652602105 | 1.249250851 | -0.403351253 | 0.08676079 | 0.200051525 |
| Hcn2       | 103 | 2.784485584 | 2.338221552 | -0.446264032 | 0.08679909 | 0.200108376 |
| Tor1aip1   | 31  | 1.058471105 | 0.693214956 | -0.365256149 | 0.08683613 | 0.200155741 |
| Klc3       | 36  | 2.119004363 | 1.793643602 | -0.325360762 | 0.08686055 | 0.200155741 |
| Ankrd50    | 51  | 1.356287902 | 1.176735924 | -0.179551978 | 0.08685075 | 0.200155741 |
| Crtac1     | 109 | 23.29896846 | 24.35798292 | 1.059014459  | 0.08688831 | 0.20016648  |
| Rnf6       | 46  | 1.130445164 | 1.330684485 | 0.200239321  | 0.0868925  | 0.20016648  |
| .10065P20F | 42  | 1.679473369 | 1.116530488 | -0.562942881 | 0.08694235 | 0.200218471 |
| Mrpl39     | 58  | 1.248763683 | 1.494370347 | 0.245606664  | 0.08693726 | 0.200218471 |
| Crem       | 58  | 0.784452983 | 1.055754753 | 0.27130177   | 0.08698255 | 0.200279596 |
| Mir8109    | 126 | 2.105323887 | 2.395849041 | 0.290525154  | 0.08700553 | 0.200301085 |
| Rrn3       | 50  | 1.100756932 | 1.100732926 | -2.40E-05    | 0.08704892 | 0.200369547 |
| Gfra2      | 35  | 42.53776933 | 40.01246811 | -2.525301216 | 0.08706429 | 0.200373498 |
| Dctd       | 41  | 4.665768207 | 4.46903647  | -0.196731737 | 0.08719094 | 0.20063351  |
| Steap2     | 84  | 1.656475954 | 1.425397863 | -0.231078091 | 0.08728863 | 0.200826809 |
| Akap13     | 37  | 1.15898255  | 0.885392008 | -0.273590542 | 0.08732507 | 0.200879138 |
| Grik2      | 17  | 36.3617134  | 37.65012093 | 1.288407524  | 0.0874079  | 0.201006659 |
| Irf7       | 4   | 2.169058638 | 2.845539299 | 0.676480661  | 0.08739823 | 0.201006659 |
| Mvd        | 19  | 1.840910925 | 1.34889376  | -0.492017164 | 0.08744089 | 0.201051016 |
| Tmem63a    | 43  | 1.740262626 | 1.342078805 | -0.398183821 | 0.08745755 | 0.201057824 |
| Srm        | 66  | 1.12154404  | 1.41392562  | 0.29238158   | 0.08747459 | 0.20106549  |
| !30440P10F | 6   | 76.07448573 | 79.82394077 | 3.749455047  | 0.08750165 | 0.201096205 |

|            |     |             |             |              |            |             |
|------------|-----|-------------|-------------|--------------|------------|-------------|
| Tmem161b   | 20  | 1.744722324 | 1.188869609 | -0.555852715 | 0.08759318 | 0.201275034 |
| Kcnmb2     | 4   | 51.21334877 | 49.83157993 | -1.381768836 | 0.08770358 | 0.201466351 |
| St6galnac6 | 45  | 9.434835844 | 8.903456374 | -0.53137947  | 0.08771763 | 0.201466351 |
| Lymr2      | 5   | 3.021291078 | 2.266190719 | -0.755100359 | 0.08771445 | 0.201466351 |
| 1-Mar      | 5   | 55.99845275 | 58.41175898 | 2.413306229  | 0.08773479 | 0.201474217 |
| Lefty1     | 5   | 94.05012571 | 89.25423856 | -4.795887143 | 0.08779716 | 0.201585914 |
| Ncapd3     | 5   | 1.124530201 | 2.89218203  | 1.767651828  | 0.08784376 | 0.201598269 |
| Tmco6      | 22  | 2.248070381 | 3.000340289 | 0.752269908  | 0.08783461 | 0.201598269 |
| Trim3      | 55  | 1.244677722 | 0.95244766  | -0.292230062 | 0.08782687 | 0.201598269 |
| Cul4a      | 126 | 1.094074809 | 1.30906871  | 0.214993901  | 0.08791269 | 0.201724909 |
| Kif1c      | 67  | 1.147768961 | 1.286655685 | 0.138886724  | 0.08800786 | 0.201911717 |
| Emx2       | 1   | 54.01234568 | 47.84482759 | -6.167518093 | 0.08828799 | 0.202522746 |
| Fat1       | 1   | 95.38461538 | 98.52941176 | 3.14479638   | 0.08830271 | 0.202524843 |
| Erf        | 52  | 1.90944638  | 1.612100102 | -0.297346278 | 0.08835557 | 0.202614419 |
| Atg2b      | 55  | 1.4859835   | 1.100644192 | -0.385339308 | 0.08846899 | 0.202811105 |
| Actl6a     | 27  | 1.466998432 | 0.924051597 | -0.542946835 | 0.08846171 | 0.202811105 |
| Apob       | 2   | 88.37209302 | 93.69462025 | 5.32252723   | 0.08855899 | 0.202954027 |
| Mir760     | 95  | 1.174052037 | 0.973014624 | -0.201037413 | 0.08855204 | 0.202954027 |
| Mrps11     | 6   | 1.646129212 | 3.440252948 | 1.794123736  | 0.08869377 | 0.20323117  |
| Bcor       | 71  | 15.23037119 | 15.83999338 | 0.609622184  | 0.08871314 | 0.203243803 |
| Bdp1       | 22  | 1.096157474 | 1.447355339 | 0.351197865  | 0.08872905 | 0.203248538 |
| Ccer1      | 4   | 91.09267583 | 93.16875653 | 2.076080698  | 0.08878835 | 0.203352632 |
| Mib1       | 30  | 1.374188478 | 1.902939904 | 0.528751426  | 0.08893844 | 0.20366458  |
| Stk24      | 91  | 1.236553228 | 1.454919299 | 0.218366071  | 0.08896695 | 0.203698093 |
| Dzip1      | 57  | 13.94797747 | 15.84357726 | 1.895599789  | 0.08906633 | 0.203893809 |
| Camk2n1    | 145 | 1.688812263 | 1.417714897 | -0.271097365 | 0.08912389 | 0.203993766 |
| Tefm       | 17  | 1.967833472 | 1.464916568 | -0.502916904 | 0.08929099 | 0.204312479 |
| L3hypdh    | 38  | 3.057331975 | 2.674832513 | -0.382499463 | 0.08928446 | 0.204312479 |
| Mir6957    | 7   | 86.4051191  | 83.81708443 | -2.588034667 | 0.08950201 | 0.204763406 |
| 10403D21F  | 5   | 14.94299789 | 11.6115007  | -3.331497188 | 0.0895279  | 0.20479071  |
| Cycs       | 13  | 1.602330907 | 1.832197637 | 0.22986673   | 0.08959336 | 0.204908499 |
| Ppp1r14b   | 48  | 0.940516824 | 1.081230973 | 0.14071415   | 0.08967166 | 0.205055634 |
| Rttm       | 3   | 3.144654088 | 1.58045977  | -1.564194318 | 0.08970534 | 0.20510069  |
| Vars       | 82  | 1.250533637 | 1.026937971 | -0.223595665 | 0.08981567 | 0.205316692 |

|            |     |             |             |              |            |             |
|------------|-----|-------------|-------------|--------------|------------|-------------|
| .10007C09F | 66  | 1.241925718 | 1.065975541 | -0.175950177 | 0.0898278  | 0.205316692 |
| Fbxo8      | 17  | 1.227401421 | 1.24222675  | 0.014825329  | 0.08984721 | 0.205329078 |
| Map1lc3a   | 62  | 1.342086601 | 1.097925305 | -0.244161296 | 0.08993308 | 0.205461304 |
| 100005D01F | 3   | 5.108032537 | 2.741256686 | -2.366775851 | 0.08992786 | 0.205461304 |
| Met        | 44  | 1.632514765 | 1.133247344 | -0.499267422 | 0.08995157 | 0.205471558 |
| Loxl1      | 1   | 73.86363636 | 62.80991736 | -11.05371901 | 0.09002313 | 0.205603017 |
| Ppp1r7     | 58  | 1.531800781 | 1.38729053  | -0.14451025  | 0.09004    | 0.205609543 |
| Usp2       | 73  | 1.963886238 | 1.610269642 | -0.353616596 | 0.09008097 | 0.205671099 |
| Mylk3      | 2   | 84.14984472 | 76.3830945  | -7.766750217 | 0.09018794 | 0.205851266 |
| Mir5122    | 10  | 2.87070456  | 2.159329253 | -0.711375306 | 0.09017806 | 0.205851266 |
| Lrrc57     | 21  | 1.446836411 | 1.520880463 | 0.074044052  | 0.09023099 | 0.205917496 |
| Bbs2       | 7   | 1.975107617 | 2.125524539 | 0.150416922  | 0.09029487 | 0.205967191 |
| Cdkn2aip   | 124 | 1.150363919 | 1.228429023 | 0.078065104  | 0.09028878 | 0.205967191 |
| Klc2       | 49  | 2.887031172 | 1.705366617 | -1.181664556 | 0.09028231 | 0.205967191 |
| Mir6980    | 6   | 87.77239213 | 81.48962908 | -6.282763049 | 0.09036275 | 0.20609     |
| Akirin2    | 98  | 1.200082465 | 0.987473549 | -0.212608916 | 0.09039114 | 0.206122697 |
| Smim19     | 77  | 1.035175384 | 0.883176429 | -0.151998954 | 0.09042474 | 0.206167282 |
| Etv5       | 53  | 1.09738814  | 1.111361518 | 0.013973378  | 0.09052734 | 0.206366108 |
| Nfat5      | 84  | 1.460409437 | 1.167183451 | -0.293225986 | 0.09055036 | 0.206366108 |
| Atp10a     | 40  | 1.307062869 | 0.933783209 | -0.373279661 | 0.09056493 | 0.206366108 |
| Slc22a5    | 42  | 1.18962958  | 0.997723527 | -0.191906052 | 0.0905682  | 0.206366108 |
| Cdh3       | 38  | 33.45507291 | 33.16805473 | -0.287018175 | 0.09062638 | 0.206441575 |
| Sfxn5      | 4   | 3.342293017 | 1.702251052 | -1.640041965 | 0.09062946 | 0.206441575 |
| Cilp2      | 9   | 13.12823961 | 12.33542559 | -0.792814022 | 0.09071379 | 0.20656954  |
| Anapc7     | 38  | 1.267987416 | 1.687510888 | 0.419523471  | 0.09070849 | 0.20656954  |
| Igsf1      | 2   | 28.61827227 | 19.11375661 | -9.504515661 | 0.09076562 | 0.206655506 |
| Epb4.1l3   | 79  | 50.08011892 | 50.91692911 | 0.836810183  | 0.09083924 | 0.206791025 |
| Pdss2      | 46  | 1.145913273 | 1.02785147  | -0.118061803 | 0.09091621 | 0.206934148 |
| Cep55      | 20  | 1.708741344 | 1.113616831 | -0.595124514 | 0.09103287 | 0.207167535 |
| Anxa11     | 48  | 1.698885366 | 1.658675452 | -0.040209913 | 0.09105171 | 0.207178288 |
| Ccdc85a    | 7   | 36.9147188  | 39.58027951 | 2.66556071   | 0.09114279 | 0.207353389 |
| Lrp5       | 129 | 3.00031692  | 2.82415755  | -0.176159371 | 0.09120817 | 0.207469954 |
| Ceacam16   | 5   | 90.08915193 | 87.65727958 | -2.431872348 | 0.0912739  | 0.207587294 |
| Srprb      | 10  | 0.984770764 | 2.381269138 | 1.396498374  | 0.09139068 | 0.207820687 |

|           |    |             |             |              |            |             |
|-----------|----|-------------|-------------|--------------|------------|-------------|
| Dda1      | 62 | 0.976406321 | 1.09485911  | 0.118452789  | 0.09164509 | 0.208308898 |
| Slc5a1    | 9  | 39.21371435 | 37.43920174 | -1.774512614 | 0.09164704 | 0.208308898 |
| Taf13     | 25 | 2.113533287 | 1.336241049 | -0.777292237 | 0.09164797 | 0.208308898 |
| Aox1      | 1  | 31.19266055 | 21.64179104 | -9.550869506 | 0.09171112 | 0.208420152 |
| Znrf4     | 43 | 82.4129023  | 80.41089325 | -2.002009048 | 0.09179949 | 0.208588693 |
| Tpgs1     | 53 | 1.312534686 | 1.025024619 | -0.287510067 | 0.09184159 | 0.208652035 |
| Gm10373   | 10 | 2.016478083 | 1.607253018 | -0.409225065 | 0.09201673 | 0.209017569 |
| Rbsn      | 12 | 1.123026013 | 1.790851712 | 0.667825698  | 0.09209409 | 0.209160915 |
| Trmt6     | 7  | 2.479079558 | 1.83418566  | -0.644893899 | 0.09214108 | 0.209235264 |
| Hras      | 57 | 1.543770178 | 1.166585134 | -0.377185045 | 0.09217017 | 0.209268933 |
| Ppih      | 27 | 1.969961505 | 2.110218536 | 0.140257031  | 0.09222915 | 0.209370432 |
| Nrp1      | 10 | 1.580519217 | 0.538843495 | -1.041675722 | 0.09230526 | 0.209510799 |
| Fhl3      | 47 | 1.740914449 | 1.295759527 | -0.445154922 | 0.09235787 | 0.209597795 |
| Topbp1    | 52 | 1.392848845 | 1.067586796 | -0.32526205  | 0.09244792 | 0.209769724 |
| Tdh       | 12 | 27.2204909  | 27.76989841 | 0.549407508  | 0.092467   | 0.20978057  |
| 5-Mar     | 83 | 1.35303046  | 1.370195561 | 0.017165102  | 0.0925129  | 0.209852258 |
| Rtca      | 51 | 1.448382645 | 1.592828741 | 0.144446096  | 0.09258728 | 0.209988518 |
| Zfp874b   | 1  | 8.888888889 | 20.68965517 | 11.80076628  | 0.0926141  | 0.210016902 |
| H2afy3    | 9  | 98.78914652 | 97.81443956 | -0.974706962 | 0.09281718 | 0.210444885 |
| Akr1a1    | 24 | 1.851288122 | 1.280034466 | -0.571253655 | 0.09302759 | 0.210889372 |
| Phgdh     | 19 | 2.74945903  | 2.565081617 | -0.184377413 | 0.09322446 | 0.211303012 |
| Tmem151a  | 57 | 2.201180981 | 1.580664587 | -0.620516394 | 0.09325712 | 0.211344393 |
| Pigv      | 65 | 1.22571335  | 1.326618059 | 0.100904709  | 0.09337332 | 0.211575051 |
| 10029C07F | 27 | 1.81488649  | 1.312774534 | -0.502111956 | 0.09338882 | 0.211577523 |
| Pik3r4    | 30 | 2.624255387 | 2.082118473 | -0.542136914 | 0.09344286 | 0.211667258 |
| Pdgfra    | 18 | 2.256178521 | 1.91180694  | -0.344371581 | 0.09365042 | 0.212104677 |
| Mgat4a    | 81 | 1.646277067 | 1.281521976 | -0.364755091 | 0.0937291  | 0.212250115 |
| Prps11    | 3  | 87.79342723 | 93.20621992 | 5.412792689  | 0.09394959 | 0.21271661  |
| Fbxo25    | 59 | 1.318064602 | 1.011137997 | -0.306926605 | 0.09419052 | 0.213196322 |
| Dfna5     | 20 | 2.044457267 | 2.913533092 | 0.869075824  | 0.09418825 | 0.213196322 |
| Flywch1   | 32 | 1.47722821  | 0.971115251 | -0.506112958 | 0.09420953 | 0.213206459 |
| Gm3336    | 8  | 12.27627637 | 13.93108542 | 1.654809053  | 0.09427567 | 0.213323233 |
| Cldn15    | 2  | 97.27066412 | 93.54596935 | -3.724694765 | 0.09445755 | 0.213668901 |
| Trmt112   | 39 | 1.273073368 | 0.891519195 | -0.381554173 | 0.09445113 | 0.213668901 |

|            |     |             |             |              |            |             |
|------------|-----|-------------|-------------|--------------|------------|-------------|
| Bckdha     | 1   | 4.511278195 | 0.99009901  | -3.521179186 | 0.09475423 | 0.214306974 |
| Inpp5a     | 89  | 1.771462819 | 1.630749114 | -0.140713705 | 0.09487571 | 0.214548654 |
| Foxs1      | 19  | 74.11353325 | 72.64482558 | -1.468707669 | 0.09492565 | 0.214628498 |
| Slc2a1     | 33  | 1.524684032 | 1.064298285 | -0.460385748 | 0.0950376  | 0.214848529 |
| Uchl5      | 82  | 1.251920726 | 1.425749669 | 0.173828942  | 0.09522695 | 0.215243418 |
| Ap4e1      | 23  | 0.849749205 | 1.278440608 | 0.428691403  | 0.09530194 | 0.215379752 |
| Ppp3ca     | 92  | 1.541039958 | 1.423958964 | -0.117080995 | 0.09535112 | 0.215457694 |
| Mxd1       | 115 | 1.375422973 | 1.323034798 | -0.052388175 | 0.09553309 | 0.215816533 |
| Fam219a    | 69  | 1.746468216 | 1.344910876 | -0.40155734  | 0.09553982 | 0.215816533 |
| Ccdc110    | 4   | 10.26865501 | 7.562263689 | -2.70639132  | 0.09555404 | 0.215816533 |
| Zfp712     | 2   | 0.27173913  | 1.171525276 | 0.899786145  | 0.09577874 | 0.216290729 |
| Socs3      | 43  | 0.938637932 | 1.261108095 | 0.322470163  | 0.09589993 | 0.216531096 |
| Ggnbp1     | 26  | 29.6631672  | 26.50922357 | -3.153943635 | 0.09592617 | 0.216557016 |
| Carns1     | 2   | 32.21749226 | 27.96897275 | -4.248519514 | 0.09605749 | 0.21676274  |
| 310408I11R | 98  | 1.446664513 | 1.21140931  | -0.235255203 | 0.09606161 | 0.21676274  |
| Pced1a     | 38  | 1.346373709 | 1.397525702 | 0.051151993  | 0.09603638 | 0.21676274  |
| 330023K18F | 15  | 2.28901779  | 1.872100028 | -0.416917762 | 0.0962549  | 0.21716549  |
| Vprbp      | 20  | 0.568096115 | 0.985373518 | 0.417277403  | 0.09632005 | 0.21727907  |
| Pus1       | 18  | 1.228229784 | 0.849616553 | -0.378613232 | 0.09635723 | 0.217329547 |
| Zfp808     | 10  | 1.137771701 | 2.355403951 | 1.21763225   | 0.09642362 | 0.217445863 |
| Hist1h2bh  | 4   | 1.194852941 | 1.943895838 | 0.749042897  | 0.09647785 | 0.217534711 |
| Pik3c2b    | 59  | 0.966375534 | 1.191430331 | 0.225054797  | 0.09670408 | 0.218011322 |
| Intu       | 28  | 1.956620508 | 1.679812396 | -0.276808113 | 0.09675875 | 0.218101066 |
| Cdyl2      | 127 | 1.526305155 | 1.600158578 | 0.073853423  | 0.09680457 | 0.218170837 |
| Lonrf1     | 75  | 1.143502227 | 0.975555227 | -0.167947    | 0.0969601  | 0.218454255 |
| Slc6a13    | 2   | 35.41437779 | 31.44673484 | -3.967642955 | 0.09694587 | 0.218454255 |
| Gm5577     | 37  | 5.117913085 | 5.351852602 | 0.233939517  | 0.09701178 | 0.218537127 |
| Ippk       | 53  | 1.443204232 | 1.147854399 | -0.295349833 | 0.09705355 | 0.218597656 |
| Rtp4       | 3   | 3.840877915 | 2.404978631 | -1.435899284 | 0.0971419  | 0.218763081 |
| Itm2c      | 24  | 0.832686578 | 0.976222307 | 0.143535728  | 0.09718366 | 0.218823539 |
| Parn       | 53  | 8.534225291 | 7.656194968 | -0.878030323 | 0.09731217 | 0.219069748 |
| Mfap4      | 4   | 76.66628959 | 73.34444698 | -3.321842615 | 0.09733375 | 0.219069748 |
| Mettl14    | 7   | 2.370329643 | 1.298460902 | -1.071868742 | 0.09733779 | 0.219069748 |
| Firre      | 3   | 19.06607376 | 12.14746372 | -6.918610045 | 0.09741254 | 0.219170755 |



|           |    |             |             |              |            |             |
|-----------|----|-------------|-------------|--------------|------------|-------------|
| Fbf1      | 22 | 1.181843419 | 0.709228851 | -0.472614568 | 0.09741165 | 0.219170755 |
| Ino80     | 56 | 1.475397874 | 1.180364687 | -0.295033187 | 0.09756963 | 0.219490537 |
| Rp1l1     | 7  | 89.80397757 | 91.27773478 | 1.473757208  | 0.09768428 | 0.219714765 |
| Pdcd2     | 67 | 1.481201469 | 1.17912282  | -0.302078649 | 0.09770792 | 0.219734245 |
| 30309D14F | 50 | 35.65028275 | 37.36888541 | 1.718602664  | 0.09775463 | 0.219805623 |
| Mettl21b  | 27 | 2.682481272 | 2.307650254 | -0.374831017 | 0.09777553 | 0.219818919 |
| Polr3gl   | 16 | 1.177247848 | 1.985638254 | 0.808390406  | 0.09786715 | 0.219991193 |
| Acaa1a    | 25 | 1.914882282 | 1.339670315 | -0.575211967 | 0.09792066 | 0.220077768 |
| Mkrn1     | 12 | 1.796957203 | 2.322816628 | 0.525859425  | 0.09805801 | 0.220352712 |
| Ankle2    | 59 | 0.996393967 | 1.114970718 | 0.118576751  | 0.09817575 | 0.220583513 |
| Ccdc117   | 57 | 1.258380896 | 1.187146714 | -0.071234182 | 0.09825833 | 0.220735253 |
| Eea1      | 71 | 1.148491725 | 1.322809306 | 0.174317581  | 0.0984248  | 0.221075384 |
| Angpt4    | 2  | 15.08578431 | 21.39285714 | 6.307072829  | 0.09846424 | 0.221106491 |
| Lin7c     | 59 | 0.964428771 | 1.377231391 | 0.41280262   | 0.09846878 | 0.221106491 |
| Tjap1     | 8  | 68.23274434 | 66.50599065 | -1.726753688 | 0.09850737 | 0.221159298 |
| Atf2      | 19 | 1.6656161   | 1.692158851 | 0.026542751  | 0.09864529 | 0.221411166 |
| Dnajc14   | 45 | 1.283941038 | 1.098652987 | -0.185288051 | 0.09864973 | 0.221411166 |
| Pdhx      | 5  | 1.643835616 | 3.638583964 | 1.994748348  | 0.09868112 | 0.221413884 |
| S100g     | 1  | 71.42857143 | 79.41176471 | 7.983193277  | 0.09867476 | 0.221413884 |
| Ift140    | 34 | 1.525648852 | 0.939098071 | -0.586550781 | 0.09870457 | 0.221432629 |
| Zfp513    | 30 | 1.658074246 | 1.277860486 | -0.380213761 | 0.09879267 | 0.221496879 |
| Samd4     | 74 | 4.424699432 | 4.209502476 | -0.215196956 | 0.09879359 | 0.221496879 |
| Birc2     | 20 | 1.685034457 | 1.202558402 | -0.482476054 | 0.09876694 | 0.221496879 |
| Chl1      | 1  | 43.33333333 | 56.52173913 | 13.1884058   | 0.09876138 | 0.221496879 |
| Gns       | 47 | 1.597667561 | 1.200541311 | -0.39712625  | 0.09896533 | 0.221848037 |
| Rnf122    | 31 | 2.611003563 | 2.386145839 | -0.224857724 | 0.09899743 | 0.221886088 |
| Pllp      | 36 | 2.987429427 | 3.815283966 | 0.82785454   | 0.09902992 | 0.221925015 |
| Pus10     | 22 | 1.254490582 | 1.500974454 | 0.246483873  | 0.09913409 | 0.222124553 |
| Acyp2     | 8  | 8.480952995 | 7.677120594 | -0.803832401 | 0.09918626 | 0.22220751  |
| Cnp       | 50 | 9.959841588 | 9.455748995 | -0.504092592 | 0.09934732 | 0.222534366 |
| 32427E13F | 19 | 1.919926574 | 1.109008154 | -0.81091842  | 0.09938249 | 0.222579168 |
| Bet1      | 11 | 1.084597243 | 2.109690428 | 1.025093185  | 0.09944953 | 0.222695317 |
| Armt1     | 27 | 1.282309444 | 1.454332938 | 0.172023494  | 0.0994748  | 0.222717909 |
| Llg12     | 57 | 1.279328948 | 1.030418812 | -0.248910136 | 0.09956261 | 0.22288052  |

|           |    |             |             |              |            |             |
|-----------|----|-------------|-------------|--------------|------------|-------------|
| Rsrc2     | 16 | 0.545259581 | 1.151802955 | 0.606543374  | 0.09959601 | 0.222921269 |
| Abhd11    | 8  | 1.462183852 | 2.41022658  | 0.948042728  | 0.09977081 | 0.22327846  |
| Gm16576   | 34 | 1.37590799  | 1.30129833  | -0.074609659 | 0.09989916 | 0.223531607 |
| Vps37c    | 44 | 1.38504606  | 1.136682021 | -0.248364039 | 0.09993849 | 0.223585526 |
| Gpc3      | 35 | 36.4019885  | 37.92433928 | 1.522350786  | 0.09998363 | 0.223652405 |
| 10001H17F | 3  | 0           | 1           | 1            | 0.10000858 | 0.223674129 |
| Usp10     | 65 | 0.992289575 | 0.633983731 | -0.358305844 | 0.10008022 | 0.223800231 |
| Cmc1      | 48 | 16.69534918 | 16.76506635 | 0.069717168  | 0.10024942 | 0.224144445 |
| Banf1     | 75 | 1.421537957 | 1.270318983 | -0.151218974 | 0.10031526 | 0.224245225 |
| Cdk5rap2  | 36 | 1.411904214 | 0.879751456 | -0.532152758 | 0.10032506 | 0.224245225 |
| Adat1     | 11 | 1.101190051 | 2.014234742 | 0.913044691  | 0.10079108 | 0.22525257  |
| Yeats4    | 28 | 0.733254616 | 0.828688274 | 0.095433658  | 0.10093398 | 0.22553756  |
| Zfp933    | 1  | 5.381165919 | 2.469135802 | -2.912030117 | 0.1009841  | 0.225615205 |
| Zfp575    | 3  | 55.25906736 | 59.61035393 | 4.351286572  | 0.10104389 | 0.225714412 |
| Slc4a8    | 61 | 1.614786915 | 2.000183638 | 0.385396723  | 0.10111293 | 0.225834272 |
| Nup37     | 24 | 1.338661834 | 0.839853787 | -0.498808047 | 0.10128653 | 0.226153148 |
| Plekhj1   | 59 | 1.204754575 | 1.265717831 | 0.060963256  | 0.10127986 | 0.226153148 |
| Stk16     | 25 | 0.899906598 | 1.411862629 | 0.511956031  | 0.10139464 | 0.226360098 |
| Prmt3     | 68 | 0.780739196 | 0.848307168 | 0.067567972  | 0.10149244 | 0.226543975 |
| Ifitm7    | 7  | 11.10577564 | 15.17539236 | 4.069616721  | 0.10161601 | 0.226785288 |
| Fancf     | 25 | 1.146619823 | 0.747135377 | -0.399484446 | 0.10167117 | 0.226873896 |
| Rhov      | 58 | 5.626617588 | 5.735350618 | 0.108733031  | 0.10168986 | 0.226881095 |
| Itgb4     | 45 | 2.186900816 | 1.609786892 | -0.577113924 | 0.10172767 | 0.226930964 |
| Cct8      | 25 | 1.197533969 | 1.34885387  | 0.151319901  | 0.10202641 | 0.227562785 |
| Mthfsl    | 1  | 2.985074627 | 9.302325581 | 6.317250955  | 0.10207839 | 0.227644125 |
| Dtx3l     | 18 | 2.252902423 | 1.69554075  | -0.557361673 | 0.10238779 | 0.228264736 |
| Ftsj2     | 5  | 0.870519044 | 0.5627416   | -0.307777444 | 0.10238084 | 0.228264736 |
| Enpp1     | 30 | 1.610030108 | 0.784230908 | -0.8257992   | 0.10246203 | 0.22839554  |
| Ddx55     | 59 | 1.032940904 | 1.186519254 | 0.15357835   | 0.10261697 | 0.228706163 |
| Myo10     | 69 | 1.745780043 | 1.378853756 | -0.366926287 | 0.1026402  | 0.228723207 |
| Rmi2      | 45 | 1.099089761 | 1.146640604 | 0.047550843  | 0.10265956 | 0.228731611 |
| Ncoa7     | 79 | 1.466339037 | 1.2995788   | -0.166760238 | 0.10271303 | 0.228815996 |
| Bmp1      | 63 | 3.780805567 | 3.432300081 | -0.348505485 | 0.10275253 | 0.228869242 |
| Pabpc4    | 36 | 1.976527224 | 2.113237021 | 0.136709797  | 0.1030044  | 0.229395445 |

|            |     |             |             |              |            |             |
|------------|-----|-------------|-------------|--------------|------------|-------------|
| Gpam       | 77  | 1.733230072 | 1.4134498   | -0.319780272 | 0.10302044 | 0.229396339 |
| Rab5a      | 101 | 1.36226005  | 1.017487069 | -0.344772981 | 0.10304791 | 0.229422702 |
| Fnip2      | 94  | 1.072627044 | 1.208924555 | 0.13629751   | 0.10308007 | 0.229459481 |
| L30218I03R | 9   | 96.69707716 | 96.24288742 | -0.454189743 | 0.10322136 | 0.229739146 |
| Ccdc87     | 11  | 2.368451883 | 1.572024207 | -0.796427676 | 0.10329062 | 0.229858439 |
| i00002H07F | 10  | 2.123452338 | 1.32282218  | -0.800630157 | 0.10339983 | 0.230031695 |
| Foxo1      | 76  | 1.407212727 | 1.375182861 | -0.032029866 | 0.10338624 | 0.230031695 |
| Rint1      | 19  | 1.730156692 | 1.301018681 | -0.429138011 | 0.10345178 | 0.230041771 |
| Relt       | 53  | 1.072388008 | 0.671174413 | -0.401213595 | 0.10346056 | 0.230041771 |
| Timm8b     | 18  | 1.407019377 | 1.047476789 | -0.359542588 | 0.10346706 | 0.230041771 |
| Bmi1       | 137 | 1.268430411 | 1.465565684 | 0.197135273  | 0.10342921 | 0.230041771 |
| Mrpl28     | 15  | 0.728905597 | 0.867630225 | 0.138724627  | 0.10356236 | 0.230158752 |
| Rps19      | 74  | 4.910031407 | 4.692494026 | -0.217537381 | 0.10354988 | 0.230158752 |
| Pap1       | 29  | 17.59297351 | 17.76207784 | 0.169104331  | 0.10356673 | 0.230158752 |
| Pcdh20     | 11  | 39.03357641 | 42.05719361 | 3.023617209  | 0.1035982  | 0.230193814 |
| Secisbp2   | 53  | 0.954156373 | 0.63286404  | -0.321292333 | 0.10363638 | 0.23024379  |
| Dip2a      | 90  | 1.483190015 | 1.111076013 | -0.372114002 | 0.10366908 | 0.230281581 |
| Wdr33      | 17  | 0.796674444 | 1.149106818 | 0.352432373  | 0.10371616 | 0.230351281 |
| Ssc4d      | 3   | 67.23646724 | 71.19927388 | 3.962806644  | 0.10387509 | 0.230669359 |
| Nudt17     | 29  | 2.79604758  | 2.056910018 | -0.739137562 | 0.10393142 | 0.230759515 |
| Ovca2      | 44  | 2.562284223 | 1.893500509 | -0.668783714 | 0.10396018 | 0.230788446 |
| Clasp1     | 12  | 1.668279093 | 1.322719858 | -0.345559235 | 0.10399377 | 0.230828099 |
| Il6ra      | 76  | 7.002082827 | 5.842385184 | -1.159697643 | 0.10402276 | 0.230836926 |
| Epha2      | 46  | 1.384873639 | 1.349348739 | -0.0355249   | 0.10402921 | 0.230836926 |
| Nxt2       | 15  | 31.41415967 | 33.86377808 | 2.449618407  | 0.10407001 | 0.230892543 |
| Myl12a     | 48  | 2.095254865 | 1.752960968 | -0.342293897 | 0.10408663 | 0.23089452  |
| Whrn       | 39  | 2.258857255 | 1.732932753 | -0.525924502 | 0.1042015  | 0.231113142 |
| Zfp341     | 75  | 1.79152082  | 1.376218141 | -0.415302679 | 0.10421669 | 0.231113142 |
| Henmt1     | 27  | 35.86700593 | 37.01823734 | 1.151231404  | 0.10442808 | 0.231546932 |
| Foxp1      | 49  | 5.465449767 | 5.639726966 | 0.174277199  | 0.10445041 | 0.231561452 |
| Usp28      | 94  | 1.547220968 | 1.351323972 | -0.195896996 | 0.10469795 | 0.232075185 |
| Camkk1     | 80  | 2.124327072 | 1.734279172 | -0.3900479   | 0.1047234  | 0.232096531 |
| Fosl2      | 72  | 0.981216325 | 1.147222981 | 0.166006656  | 0.10477639 | 0.232178921 |
| i10403A07F | 27  | 1.75452252  | 1.32208986  | -0.43243266  | 0.10506669 | 0.232787036 |

|             |     |             |             |              |            |             |
|-------------|-----|-------------|-------------|--------------|------------|-------------|
| Ttc41       | 17  | 11.66957654 | 11.98940125 | 0.319824705  | 0.10511497 | 0.232823715 |
| Mrto4       | 19  | 1.328567597 | 1.018769305 | -0.309798292 | 0.10510543 | 0.232823715 |
| Wrn         | 84  | 1.497635738 | 1.334590793 | -0.163044945 | 0.10514727 | 0.232860096 |
| Ndufb8      | 27  | 1.381521349 | 1.267443398 | -0.114077951 | 0.10518307 | 0.232904238 |
| Sf3b5       | 18  | 1.490239273 | 0.845547697 | -0.644691576 | 0.10527343 | 0.233069143 |
| Pqlc3       | 25  | 2.358825734 | 1.941269119 | -0.417556615 | 0.10529736 | 0.233086971 |
| Zc3h12a     | 44  | 1.507316799 | 1.090300961 | -0.417015837 | 0.10532765 | 0.233118855 |
| Tmem177     | 22  | 2.48530331  | 2.362600708 | -0.122702602 | 0.1054091  | 0.233263929 |
| Polg        | 98  | 1.279588367 | 2.073500087 | 0.79391172   | 0.10544843 | 0.233284955 |
| Tmem63b     | 41  | 1.437592377 | 1.094957595 | -0.342634782 | 0.1054504  | 0.233284955 |
| Ermp1       | 73  | 1.106811293 | 0.991149027 | -0.115662266 | 0.10552949 | 0.233424752 |
| Krcc1       | 43  | 1.346574716 | 1.522317374 | 0.175742658  | 0.10556224 | 0.233461982 |
| Zbtb11      | 81  | 1.085908058 | 1.173586629 | 0.087678571  | 0.1055995  | 0.233509211 |
| Mtss1l      | 91  | 3.54240897  | 3.12105849  | -0.42135048  | 0.10564955 | 0.233584666 |
| Ier2        | 32  | 1.660198419 | 0.98975243  | -0.670445989 | 0.10573    | 0.233692115 |
| Pkn1        | 93  | 1.296040686 | 0.963929053 | -0.332111633 | 0.10572453 | 0.233692115 |
| Snap23      | 24  | 1.617569376 | 1.05727615  | -0.560293226 | 0.10583874 | 0.233897232 |
| Tsc22d2     | 191 | 1.233032283 | 1.170507271 | -0.062525012 | 0.1058737  | 0.233939277 |
| Dirc2       | 76  | 1.459510078 | 1.385145422 | -0.074364656 | 0.10602698 | 0.234242686 |
| Lats2       | 105 | 0.94653025  | 1.001314859 | 0.05478461   | 0.10604855 | 0.234255065 |
| Dixdc1      | 28  | 0.838346383 | 1.333359585 | 0.495013202  | 0.10622043 | 0.234599431 |
| PPP3427E11F | 24  | 2.265334023 | 2.159175162 | -0.106158861 | 0.10628171 | 0.234634625 |
| Ppp1r21     | 65  | 1.328696309 | 1.498170864 | 0.169474555  | 0.10625792 | 0.234634625 |
| Hadh        | 30  | 1.536650378 | 1.46563574  | -0.071014638 | 0.10628434 | 0.234634625 |
| Nab2        | 49  | 1.710283194 | 1.417419622 | -0.292863572 | 0.1063179  | 0.234660245 |
| Krtap16-1   | 6   | 81.51782453 | 83.68075397 | 2.162929439  | 0.10632792 | 0.234660245 |
| Ddx11       | 12  | 0.612382    | 0.232774674 | -0.379607325 | 0.10640047 | 0.234785042 |
| Commd6      | 13  | 1.890869852 | 1.244823921 | -0.646045932 | 0.10644551 | 0.234849115 |
| Itpkc       | 35  | 7.045449139 | 5.265790926 | -1.779658213 | 0.10666964 | 0.235308222 |
| Arfip2      | 17  | 1.647544218 | 1.509776713 | -0.137767505 | 0.1068288  | 0.235623893 |
| Aldh18a1    | 33  | 2.46042314  | 1.955483874 | -0.504939267 | 0.10689577 | 0.235700762 |
| Dctn6       | 5   | 0.829493088 | 1.799242424 | 0.969749337  | 0.1068845  | 0.235700762 |
| Bgn         | 5   | 73.62441202 | 77.55491228 | 3.930500261  | 0.10700015 | 0.235895458 |
| Csf1        | 30  | 0.900886953 | 0.951650921 | 0.050763968  | 0.10702329 | 0.235911034 |

|            |     |             |             |              |            |             |
|------------|-----|-------------|-------------|--------------|------------|-------------|
| Hoxc11     | 31  | 24.51571075 | 25.51328627 | 0.997575517  | 0.10710307 | 0.236051428 |
| Wdr74      | 20  | 1.970610415 | 2.179358041 | 0.208747626  | 0.10719813 | 0.236225456 |
| Mir6988    | 3   | 89.70355436 | 91.41706924 | 1.713514882  | 0.10727041 | 0.236349251 |
| Mir713     | 5   | 6.561003861 | 6.01441867  | -0.546585191 | 0.10738802 | 0.236572851 |
| Ankrd46    | 37  | 1.414055315 | 1.551265025 | 0.13720971   | 0.10745387 | 0.236682382 |
| Nedd9      | 6   | 1.997476871 | 0.31152648  | -1.685950392 | 0.10752973 | 0.236797705 |
| Stap2      | 4   | 19.03567447 | 15.52860198 | -3.507072492 | 0.1075385  | 0.236797705 |
| Gm13034    | 16  | 70.80720615 | 70.93607598 | 0.128869826  | 0.10764431 | 0.236995139 |
| Phlpp1     | 98  | 1.133218602 | 1.024902295 | -0.108316307 | 0.10766856 | 0.237012958 |
| Frm4a      | 43  | 1.812896959 | 1.530978602 | -0.281918356 | 0.10772481 | 0.237101228 |
| Git2       | 81  | 1.340558936 | 1.037708679 | -0.302850257 | 0.10775743 | 0.237137455 |
| Ubxn8      | 43  | 1.609578036 | 0.994559352 | -0.615018684 | 0.10778267 | 0.237157438 |
| Pdap1      | 48  | 0.974534945 | 1.227823165 | 0.25328822   | 0.10782659 | 0.237218498 |
| Hmha1      | 7   | 12.00971304 | 10.55644822 | -1.453264817 | 0.10792464 | 0.237398624 |
| Atf7ip2    | 54  | 23.04200984 | 22.27687688 | -0.765132957 | 0.10797403 | 0.237471658 |
| Ndufb6     | 22  | 1.364310097 | 1.812040046 | 0.447729948  | 0.10807491 | 0.237657908 |
| Phf19      | 78  | 1.712600657 | 1.383521372 | -0.329079285 | 0.10824233 | 0.237990393 |
| Gpr108     | 18  | 2.368477293 | 2.187586448 | -0.180890845 | 0.10828457 | 0.238047604 |
| Rnasek     | 2   | 3.977272727 | 0.961538462 | -3.015734266 | 0.10834482 | 0.238073068 |
| Tpd52      | 69  | 1.24496036  | 0.916803698 | -0.328156662 | 0.10833658 | 0.238073068 |
| Zkscan17   | 50  | 2.838764214 | 2.189163872 | -0.649600342 | 0.10831528 | 0.238073068 |
| Sbds       | 9   | 1.153085348 | 2.475482025 | 1.322396678  | 0.10839785 | 0.238118271 |
| Etv6       | 60  | 0.972391916 | 0.806798327 | -0.165593589 | 0.10838706 | 0.238118271 |
| Ypel3      | 40  | 1.388179619 | 1.071577778 | -0.316601841 | 0.10853166 | 0.238376517 |
| Slc6a6     | 42  | 0.813904285 | 0.896827301 | 0.082923016  | 0.1085661  | 0.238416492 |
| Cgn        | 25  | 1.419110203 | 1.427469449 | 0.008359246  | 0.10858619 | 0.238424921 |
| Sik2       | 104 | 1.788047119 | 1.346250023 | -0.441797097 | 0.10860572 | 0.238432132 |
| Prdx2      | 37  | 1.341432561 | 1.658641087 | 0.317208526  | 0.10898992 | 0.2392398   |
| 132438H23F | 8   | 63.29960274 | 60.28251628 | -3.017086455 | 0.10901121 | 0.239250739 |
| Morn5      | 9   | 2.916212819 | 1.56592895  | -1.350283869 | 0.10908861 | 0.239349017 |
| Mbnl1      | 98  | 1.203615033 | 1.032211898 | -0.171403135 | 0.10908829 | 0.239349017 |
| Pabpc1l    | 7   | 96.61036259 | 94.28673725 | -2.32362534  | 0.10919605 | 0.239513129 |
| Kcqh6      | 23  | 3.346400297 | 2.8159578   | -0.530442498 | 0.10919406 | 0.239513129 |
| Clp1       | 19  | 1.314386438 | 0.893439383 | -0.420947055 | 0.10928154 | 0.239664823 |

|            |    |             |             |              |            |             |
|------------|----|-------------|-------------|--------------|------------|-------------|
| Med8       | 30 | 1.753188659 | 1.341241557 | -0.411947102 | 0.10951343 | 0.240101599 |
| Slc25a38   | 47 | 1.791754681 | 1.605251886 | -0.186502795 | 0.10949732 | 0.240101599 |
| Dnajc10    | 48 | 1.317763956 | 1.240348369 | -0.077415587 | 0.10958662 | 0.240226192 |
| Cd38       | 2  | 8.374183007 | 4.938271605 | -3.435911402 | 0.10982216 | 0.240699593 |
| Fam3a      | 13 | 15.03733862 | 17.29334926 | 2.256010646  | 0.10983539 | 0.240699593 |
| Creb3l2    | 23 | 1.03465045  | 0.835784086 | -0.198866364 | 0.10998199 | 0.240984872 |
| Ccdc173    | 17 | 0.843775779 | 1.324586848 | 0.480811068  | 0.11002636 | 0.24099872  |
| Mir3093    | 35 | 31.41920513 | 34.11267486 | 2.693469731  | 0.11003758 | 0.24099872  |
| Ccdc162    | 1  | 98.13084112 | 95.6043956  | -2.526445517 | 0.11003715 | 0.24099872  |
| Ankrd32    | 44 | 1.160833865 | 1.359575247 | 0.198741382  | 0.11006001 | 0.241011885 |
| Abhd16b    | 6  | 93.84383579 | 93.84545682 | 0.00162103   | 0.11010754 | 0.241079978 |
| Ffar2      | 2  | 49.0899042  | 42.39372048 | -6.696183723 | 0.11015823 | 0.241154983 |
| Ky         | 37 | 44.11189911 | 43.15894438 | -0.952954733 | 0.11023562 | 0.241288406 |
| Tbcd       | 20 | 1.241273451 | 1.175938171 | -0.06533528  | 0.11025684 | 0.241298856 |
| Mok        | 30 | 1.962444197 | 1.46710414  | -0.495340057 | 0.11032029 | 0.241329751 |
| Sqstm1     | 11 | 1.069495886 | 2.406078759 | 1.336582873  | 0.11031142 | 0.241329751 |
| BC024978   | 50 | 1.24580391  | 1.004911669 | -0.240892241 | 0.11030939 | 0.241329751 |
| h10004B18F | 78 | 1.549098075 | 1.333313065 | -0.21578501  | 0.1103702  | 0.241362851 |
| Itga2b     | 9  | 63.24144933 | 65.38676328 | 2.145313959  | 0.11038477 | 0.241362851 |
| h33417C18F | 4  | 1.96965415  | 1.310043668 | -0.659610482 | 0.11035783 | 0.241362851 |
| Mir8112    | 45 | 1.262994826 | 1.592394641 | 0.329399815  | 0.11042752 | 0.241420356 |
| Marcksl1   | 67 | 2.738783388 | 1.950529549 | -0.788253839 | 0.11053717 | 0.241624078 |
| Stard3nl   | 23 | 0.976987115 | 1.224230479 | 0.247243364  | 0.11056336 | 0.241645339 |
| BC029214   | 13 | 1.270824763 | 2.728873239 | 1.458048476  | 0.11058943 | 0.241666322 |
| Txk        | 2  | 50.88303282 | 43.91951744 | -6.963515383 | 0.1107006  | 0.241873229 |
| Upk2       | 2  | 45.93686263 | 49.83822797 | 3.901365345  | 0.11079636 | 0.242046412 |
| Ahi1       | 62 | 1.977816343 | 1.303747793 | -0.67406855  | 0.11084363 | 0.242113636 |
| Arfgap3    | 40 | 1.393014165 | 1.032137063 | -0.360877102 | 0.11108846 | 0.242484634 |
| Arl8b      | 49 | 1.135593363 | 1.00691086  | -0.128682503 | 0.11104913 | 0.242484634 |
| Piezo2     | 62 | 50.01138964 | 50.7184282  | 0.70703856   | 0.1110961  | 0.242484634 |
| Tcta       | 11 | 1.175584626 | 0.669110701 | -0.506473925 | 0.1110507  | 0.242484634 |
| Aplf       | 11 | 1.196706636 | 0.717225747 | -0.479480889 | 0.11106739 | 0.242484634 |
| Tmem106a   | 10 | 2.214170967 | 1.806112866 | -0.4080581   | 0.11114108 | 0.242546735 |
| Gtppb4     | 22 | 1.441385177 | 1.475222556 | 0.033837379  | 0.11121577 | 0.242644198 |

|            |     |             |             |              |            |             |
|------------|-----|-------------|-------------|--------------|------------|-------------|
| Casp8ap2   | 11  | 0.587106482 | 1.43608373  | 0.848977247  | 0.11121881 | 0.242644198 |
| Mlh1       | 32  | 0.89688298  | 1.369727876 | 0.472844896  | 0.11126741 | 0.242714143 |
| Cfap44     | 3   | 25.1984127  | 29.07997939 | 3.881566696  | 0.11137584 | 0.242914545 |
| AstI       | 3   | 29.55712206 | 26.28326957 | -3.273852495 | 0.11145232 | 0.243045224 |
| 130440G07F | 1   | 91.25       | 82.92682927 | -8.323170732 | 0.11161271 | 0.243354834 |
| Zfp53      | 15  | 2.482364514 | 1.765093767 | -0.717270747 | 0.11163736 | 0.243354834 |
| Ccdc15     | 21  | 2.005766206 | 1.655970051 | -0.349796155 | 0.11165701 | 0.243354834 |
| Fam208b    | 49  | 1.30338234  | 1.075832101 | -0.227550239 | 0.11166063 | 0.243354834 |
| Rnf115     | 50  | 1.199319516 | 1.001417904 | -0.197901612 | 0.11182029 | 0.243657759 |
| Herpud2    | 76  | 1.555878718 | 1.411808356 | -0.144070362 | 0.11183283 | 0.243657759 |
| Hlx        | 60  | 1.075830348 | 1.453964339 | 0.378133991  | 0.11190129 | 0.243770706 |
| Cenpe      | 21  | 1.261784766 | 0.639358793 | -0.622425973 | 0.11197897 | 0.243867524 |
| Pnma3      | 10  | 76.94866161 | 73.95036163 | -2.998299984 | 0.11196764 | 0.243867524 |
| Loh12cr1   | 40  | 1.522594002 | 1.342492714 | -0.180101289 | 0.11228516 | 0.244498055 |
| Nup210     | 77  | 1.030182777 | 0.786282788 | -0.243899989 | 0.11231082 | 0.244517656 |
| Acta1      | 8   | 29.48931185 | 32.04992631 | 2.560614464  | 0.11249712 | 0.244886912 |
| Tgif1      | 52  | 1.584078351 | 1.781114535 | 0.197036184  | 0.11257895 | 0.245015729 |
| Rab34      | 96  | 1.631786829 | 1.453867011 | -0.177919818 | 0.11258969 | 0.245015729 |
| Tceb2      | 51  | 1.622204038 | 1.766017704 | 0.143813666  | 0.11263345 | 0.245074619 |
| Mir762     | 43  | 1.771340316 | 1.458527729 | -0.312812586 | 0.11265307 | 0.245080972 |
| 110015A10F | 46  | 1.567490775 | 1.624825502 | 0.057334727  | 0.11268629 | 0.245116898 |
| Paqr7      | 23  | 0.866757421 | 1.207051909 | 0.340294488  | 0.11272004 | 0.245117648 |
| Egfr       | 36  | 2.01810945  | 1.715261002 | -0.302848447 | 0.11270601 | 0.245117648 |
| Gm16845    | 33  | 0.778872942 | 1.13884276  | 0.359969817  | 0.11286957 | 0.245370086 |
| Ttc21a     | 18  | 2.432565338 | 2.408839487 | -0.023725851 | 0.11286786 | 0.245370086 |
| Esys1      | 44  | 3.009674169 | 2.662216204 | -0.347457964 | 0.11292459 | 0.245453327 |
| Jagn1      | 27  | 1.439732107 | 0.899008246 | -0.540723862 | 0.1129695  | 0.245502247 |
| Wdr6       | 33  | 1.802770143 | 1.339611719 | -0.463158424 | 0.11298056 | 0.245502247 |
| Coro7      | 11  | 2.721402863 | 2.014487333 | -0.70691553  | 0.11309605 | 0.245691526 |
| Taf11      | 18  | 0.863262911 | 1.084997843 | 0.221734932  | 0.11310115 | 0.245691526 |
| Nudt4      | 113 | 1.194664469 | 1.188390369 | -0.0062741   | 0.11312332 | 0.245703325 |
| Cstf3      | 34  | 0.998758222 | 1.079800629 | 0.081042407  | 0.11325474 | 0.245952349 |
| Bcas2      | 24  | 0.695081989 | 0.613492711 | -0.081589278 | 0.11331959 | 0.246056771 |
| Mfn1       | 28  | 1.532569322 | 1.248114305 | -0.284455017 | 0.11336231 | 0.2460767   |

|            |     |             |             |              |            |             |
|------------|-----|-------------|-------------|--------------|------------|-------------|
| Dgcr6      | 49  | 3.133717435 | 3.160323317 | 0.026605882  | 0.1133593  | 0.2460767   |
| Gucy2c     | 1   | 33.80782918 | 28.03234501 | -5.775484168 | 0.11343285 | 0.246120607 |
| Brf1       | 82  | 1.217077739 | 0.991390514 | -0.225687225 | 0.11343017 | 0.246120607 |
| Nmd3       | 55  | 1.504662591 | 1.214532338 | -0.290130253 | 0.11340085 | 0.246120607 |
| Tmem150c   | 23  | 2.950006421 | 2.332832334 | -0.617174087 | 0.11345477 | 0.24613178  |
| Immt       | 31  | 1.162484389 | 1.312370255 | 0.149885866  | 0.11377478 | 0.246789532 |
| Erlin2     | 35  | 4.349464939 | 3.296658862 | -1.052806076 | 0.11381268 | 0.246835244 |
| Cd164      | 37  | 1.08379553  | 0.788793748 | -0.295001783 | 0.11382987 | 0.246836047 |
| Tubgcp3    | 35  | 2.118257789 | 1.240365338 | -0.877892451 | 0.11391181 | 0.246940739 |
| Mir5131    | 107 | 1.029369831 | 1.113201752 | 0.083831921  | 0.11389718 | 0.246940739 |
| Pum1       | 71  | 1.031313199 | 1.285703333 | 0.254390135  | 0.11396034 | 0.247009467 |
| Cdc16      | 55  | 1.384216247 | 1.148953309 | -0.235262938 | 0.11416683 | 0.247420487 |
| Ttf2       | 13  | 1.645523219 | 1.29445355  | -0.351069669 | 0.11427318 | 0.247614397 |
| Hdlbp      | 108 | 1.326775103 | 1.193666218 | -0.133108885 | 0.11437449 | 0.247748802 |
| 700021F05F | 36  | 1.058212381 | 1.458968356 | 0.400755975  | 0.11438586 | 0.247748802 |
| Nhlrc2     | 44  | 1.213168067 | 1.07177499  | -0.141393077 | 0.11437445 | 0.247748802 |
| Mesdc2     | 13  | 0.735384214 | 1.567292236 | 0.831908022  | 0.11445992 | 0.24787262  |
| Gm11538    | 19  | 33.21450896 | 33.40307021 | 0.188561255  | 0.11452283 | 0.247972261 |
| Ap3b1      | 13  | 0.59477761  | 0.893100189 | 0.298322579  | 0.11466435 | 0.24824206  |
| Asb4       | 7   | 52.328956   | 56.07548429 | 3.746528289  | 0.11473909 | 0.248367234 |
| Xylt2      | 95  | 1.182170929 | 1.505196615 | 0.323025686  | 0.1148616  | 0.248567647 |
| Zfp84      | 8   | 2.000735178 | 0.901412668 | -1.09932251  | 0.11486556 | 0.248567647 |
| Tmem56     | 77  | 7.096092337 | 6.682511625 | -0.413580712 | 0.11490357 | 0.248613242 |
| Cnnm4      | 58  | 1.41205737  | 0.84277357  | -0.5692838   | 0.11496151 | 0.248701922 |
| Ptpn11     | 105 | 1.513118665 | 1.370511625 | -0.142607039 | 0.11511553 | 0.248994445 |
| Prprt3     | 11  | 22.06555018 | 20.49260575 | -1.572944422 | 0.11513066 | 0.248994445 |
| Sugt1      | 28  | 1.771206871 | 1.167312287 | -0.603894583 | 0.11519201 | 0.249090426 |
| Lrrc8a     | 66  | 1.235486915 | 0.908989524 | -0.326497391 | 0.11529156 | 0.249268947 |
| Cckbr      | 4   | 10.42041146 | 8.54337789  | -1.877033569 | 0.11545561 | 0.249586865 |
| Ano10      | 29  | 1.269278959 | 1.280396299 | 0.01111734   | 0.11556069 | 0.249771398 |
| Scaf8      | 80  | 1.330006009 | 1.295395489 | -0.03461052  | 0.11557502 | 0.249771398 |
| Atp6v0a1   | 35  | 0.878159376 | 1.087721175 | 0.2095618    | 0.11565584 | 0.249909254 |
| Cdh26      | 1   | 66.91729323 | 58.37563452 | -8.541658715 | 0.11586647 | 0.250312561 |
| Hexim2     | 48  | 2.190687337 | 1.82443671  | -0.366250627 | 0.1158766  | 0.250312561 |



|            |     |             |             |              |            |             |
|------------|-----|-------------|-------------|--------------|------------|-------------|
| Cenpl      | 16  | 2.173563376 | 1.467208779 | -0.706354597 | 0.11619043 | 0.250952089 |
| Rffl       | 63  | 1.283224522 | 1.371457042 | 0.08823252   | 0.11620686 | 0.250952089 |
| !30307C23F | 2   | 1.041666667 | 2.67878498  | 1.637118313  | 0.11626824 | 0.251010753 |
| Zscan29    | 23  | 1.498953266 | 1.752849971 | 0.253896705  | 0.11625367 | 0.251010753 |
| Zkscan6    | 48  | 0.937232128 | 1.0670123   | 0.129780172  | 0.11639736 | 0.251252562 |
| Dlx1       | 29  | 1.210387775 | 1.855818952 | 0.645431178  | 0.11671178 | 0.25183326  |
| Pcolce2    | 78  | 1.954352289 | 1.735004886 | -0.219347403 | 0.11670951 | 0.25183326  |
| Tet1       | 2   | 78.47884917 | 83.76623377 | 5.287384599  | 0.11671787 | 0.25183326  |
| Ei24       | 57  | 1.633415981 | 1.787855305 | 0.154439324  | 0.11676552 | 0.251899039 |
| Sde2       | 50  | 0.929712585 | 1.116379061 | 0.186666476  | 0.11692542 | 0.252206917 |
| Stmn1      | 41  | 1.501422238 | 1.19199403  | -0.309428207 | 0.11699927 | 0.252329103 |
| Traf7      | 20  | 2.03645957  | 1.476009017 | -0.560450553 | 0.11703858 | 0.252339709 |
| Trmu       | 12  | 1.618502916 | 1.402002968 | -0.216499948 | 0.11703803 | 0.252339709 |
| Alg14      | 12  | 2.066414284 | 1.456781213 | -0.609633071 | 0.11707708 | 0.252385633 |
| Ttc7b      | 88  | 1.703170294 | 1.382698395 | -0.320471899 | 0.11727123 | 0.252767051 |
| Fam53a     | 72  | 1.34260608  | 1.090160602 | -0.252445478 | 0.11729523 | 0.252781652 |
| Rabep2     | 41  | 1.564926982 | 1.706920327 | 0.141993345  | 0.1173236  | 0.252805649 |
| Pcdh9      | 30  | 43.71131927 | 41.81721205 | -1.89410722  | 0.11737426 | 0.252869831 |
| Esrp2      | 42  | 2.115372434 | 1.862355895 | -0.25301654  | 0.11738785 | 0.252869831 |
| Pkm        | 25  | 1.614887477 | 1.698940865 | 0.084053388  | 0.11742737 | 0.252917846 |
| Ubc        | 40  | 1.061469274 | 1.636161887 | 0.574692613  | 0.11767655 | 0.253417334 |
| Atrnl1     | 107 | 1.289271207 | 1.291391146 | 0.00211994   | 0.11776696 | 0.253571806 |
| Dock4      | 48  | 1.092475968 | 1.209838217 | 0.117362249  | 0.11778284 | 0.253571806 |
| Pip5k1a    | 16  | 2.688966046 | 1.636239065 | -1.052726981 | 0.11781233 | 0.253598087 |
| BC051226   | 55  | 1.5825208   | 1.240777543 | -0.341743256 | 0.11787812 | 0.25370249  |
| Rbpjl      | 2   | 21.57894737 | 28.65168539 | 7.072738025  | 0.11790995 | 0.25373377  |
| Ssbp4      | 20  | 0.458572178 | 0.72682827  | 0.268256092  | 0.11797366 | 0.253796438 |
| Rsb1       | 20  | 1.548636505 | 1.032893557 | -0.515742948 | 0.11796557 | 0.253796438 |
| Gm16998    | 23  | 1.169903011 | 1.689641615 | 0.519738604  | 0.11818345 | 0.254135991 |
| Zfp51      | 16  | 1.449157203 | 1.286191763 | -0.16296544  | 0.11816124 | 0.254135991 |
| Synm       | 67  | 1.557548539 | 1.408710625 | -0.148837914 | 0.118174   | 0.254135991 |
| AU015228   | 5   | 95.48376709 | 92.73117173 | -2.752595365 | 0.11820982 | 0.254155442 |
| AW209491   | 12  | 3.202641986 | 2.12650158  | -1.076140407 | 0.11827504 | 0.254258409 |
| Fam83d     | 46  | 1.230798281 | 0.950030265 | -0.280768016 | 0.11842414 | 0.25446682  |

|            |     |             |             |              |            |             |
|------------|-----|-------------|-------------|--------------|------------|-------------|
| Ubtf       | 248 | 1.54486576  | 1.429663514 | -0.115202245 | 0.11844135 | 0.25446682  |
| Zfp740     | 86  | 1.353718152 | 1.249338102 | -0.104380049 | 0.11843206 | 0.25446682  |
| Cdk14      | 122 | 1.36954865  | 1.17368338  | -0.19586527  | 0.11839284 | 0.25446682  |
| Kansl1     | 111 | 1.174348006 | 1.282788686 | 0.108440679  | 0.11848048 | 0.25451362  |
| Akap11     | 18  | 7.408130766 | 9.303302328 | 1.895171563  | 0.11869525 | 0.254937668 |
| 30066F11F  | 68  | 1.500864284 | 1.380219522 | -0.120644762 | 0.11874854 | 0.254977468 |
| 30024D21F  | 7   | 89.59435364 | 85.64791507 | -3.946438578 | 0.11874352 | 0.254977468 |
| Ssrp1      | 14  | 1.615388442 | 1.62768637  | 0.012297928  | 0.11885512 | 0.255168997 |
| Slc2a3     | 3   | 57.11213518 | 51.9379845  | -5.174150681 | 0.11887262 | 0.255169219 |
| Tax1bp3    | 32  | 1.545552282 | 1.100904109 | -0.444648173 | 0.11896958 | 0.255340005 |
| Atp8b1     | 89  | 24.1053462  | 24.7959422  | 0.690595997  | 0.11909981 | 0.255544764 |
| Zfp872     | 5   | 63.74860836 | 60.80342171 | -2.945186652 | 0.1190925  | 0.255544764 |
| Nap1l3     | 21  | 23.34188939 | 25.14897284 | 1.807083447  | 0.11912171 | 0.255554382 |
| Smap2      | 48  | 1.776362639 | 1.593828216 | -0.182534423 | 0.11932618 | 0.255955607 |
| Commd4     | 4   | 4.658735821 | 3.633893809 | -1.024842012 | 0.11945663 | 0.256197986 |
| Ptbp2      | 83  | 1.300414293 | 1.549493323 | 0.24907903   | 0.11953255 | 0.256308048 |
| Cacna1g    | 83  | 1.967948109 | 2.297055163 | 0.329107054  | 0.11954288 | 0.256308048 |
| Poc1a      | 19  | 1.005283752 | 1.465568584 | 0.460284832  | 0.11984853 | 0.256925843 |
| Pard6a     | 15  | 1.164249569 | 1.542745451 | 0.378495882  | 0.11987353 | 0.256941895 |
| Tmem43     | 10  | 1.121038133 | 1.72277733  | 0.601739197  | 0.11989657 | 0.256953746 |
| Atp6v0e    | 25  | 1.586624293 | 2.070308671 | 0.483684379  | 0.12006897 | 0.25728563  |
| Apmap      | 17  | 1.269137518 | 0.937051648 | -0.332085871 | 0.12012123 | 0.257360038 |
| Sertad3    | 23  | 1.547881812 | 1.869593527 | 0.321711714  | 0.12039719 | 0.257902899 |
| Stat1      | 51  | 1.533402116 | 1.771314934 | 0.237912818  | 0.12040976 | 0.257902899 |
| Hcfc1r1    | 8   | 1.449805068 | 0.247524752 | -1.202280316 | 0.12053756 | 0.258138968 |
| Wbscr27    | 17  | 1.885946556 | 1.340473316 | -0.545473241 | 0.12059508 | 0.258186788 |
| Lipt2      | 27  | 1.375371202 | 0.89406817  | -0.481303032 | 0.12058582 | 0.258186788 |
| Abca1      | 36  | 5.452204719 | 6.106051963 | 0.653847245  | 0.12067825 | 0.258327159 |
| Crbn       | 50  | 1.978393575 | 1.691151268 | -0.287242306 | 0.12080711 | 0.258478662 |
| Raph1      | 68  | 1.005678439 | 0.789301261 | -0.216377178 | 0.12087233 | 0.258478662 |
| Apitd1     | 34  | 1.315434137 | 1.301473378 | -0.013960759 | 0.12086721 | 0.258478662 |
| Casz1      | 55  | 2.329542432 | 2.161009018 | -0.168533415 | 0.12082328 | 0.258478662 |
| 30421F17F  | 2   | 68.58974359 | 61.64502165 | -6.944721945 | 0.12084621 | 0.258478662 |
| 700015F17F | 3   | 93.05420091 | 88.03872054 | -5.015480371 | 0.1207803  | 0.258478662 |

|            |     |             |             |              |            |             |
|------------|-----|-------------|-------------|--------------|------------|-------------|
| Rybp       | 166 | 1.30777656  | 1.405019238 | 0.097242678  | 0.12079527 | 0.258478662 |
| Rab27b     | 7   | 1.147136256 | 1.036481199 | -0.110655056 | 0.12096876 | 0.258647183 |
| Lbr        | 155 | 1.13146399  | 1.015569445 | -0.115894545 | 0.12101314 | 0.258704363 |
| Cdhr1      | 3   | 6.554299347 | 5.075757576 | -1.478541771 | 0.12104716 | 0.258739411 |
| Gosr2      | 28  | 1.432919168 | 1.653641588 | 0.22072242   | 0.1210873  | 0.258787512 |
| Agbl5      | 29  | 1.574868568 | 1.209618713 | -0.365249854 | 0.12112255 | 0.258825155 |
| Ilkap      | 36  | 1.327861544 | 1.066511509 | -0.261350035 | 0.12115931 | 0.258866003 |
| Tbc1d15    | 46  | 1.423450521 | 1.399178732 | -0.02427179  | 0.12131789 | 0.259167082 |
| Zfp64      | 20  | 1.153212272 | 0.816124221 | -0.33708805  | 0.12137616 | 0.259253833 |
| Fam175b    | 49  | 1.259124331 | 1.456948916 | 0.197824586  | 0.12149572 | 0.259471421 |
| Tmc8       | 13  | 22.8636851  | 24.73852635 | 1.87484125   | 0.12153815 | 0.259524278 |
| Fam83g     | 62  | 4.446035033 | 5.016429602 | 0.570394568  | 0.12156213 | 0.259537709 |
| Arhgef17   | 22  | 2.149874131 | 1.634056013 | -0.515818117 | 0.12172689 | 0.259826709 |
| Mblac2     | 54  | 1.818837273 | 1.539193089 | -0.279644184 | 0.1217329  | 0.259826709 |
| Edrf1      | 22  | 1.245523912 | 1.4847807   | 0.239256788  | 0.1218461  | 0.260030489 |
| Dennd1b    | 79  | 0.987220597 | 1.185406822 | 0.198186225  | 0.12191828 | 0.260124131 |
| Tmtc3      | 46  | 1.112049341 | 1.59533937  | 0.483290029  | 0.12194316 | 0.260124131 |
| Lpp        | 27  | 2.270123318 | 1.979717798 | -0.29040552  | 0.12193668 | 0.260124131 |
| Msra       | 29  | 1.337315268 | 1.473075586 | 0.135760318  | 0.12202656 | 0.260226388 |
| Man1a      | 37  | 1.14703857  | 1.363558847 | 0.216520277  | 0.1220236  | 0.260226388 |
| Med1       | 40  | 1.600804969 | 1.945524737 | 0.344719768  | 0.12228467 | 0.260718721 |
| Eme2       | 1   | 7.258064516 | 4.930966469 | -2.327098047 | 0.12229296 | 0.260718721 |
| '00003G18F | 13  | 5.74838655  | 6.168330743 | 0.419944194  | 0.12240219 | 0.260913671 |
| Mynn       | 25  | 2.476597858 | 2.023766323 | -0.452831535 | 0.12244691 | 0.260971096 |
| G0s2       | 4   | 44.21040501 | 49.71357819 | 5.503173183  | 0.12252566 | 0.261101003 |
| Slc11a2    | 63  | 1.873194074 | 1.715752329 | -0.157441745 | 0.12256075 | 0.261137865 |
| Zdhhc8     | 64  | 2.57116289  | 2.156588309 | -0.414574581 | 0.12258894 | 0.261147639 |
| Mrpl57     | 52  | 1.036888911 | 1.043008428 | 0.006119517  | 0.12260093 | 0.261147639 |
| Diablo     | 83  | 1.33987455  | 1.137042632 | -0.202831918 | 0.12266875 | 0.261254172 |
| Gm5086     | 2   | 69.74851897 | 65.91998344 | -3.828535526 | 0.12276259 | 0.261416077 |
| Ndufa4     | 54  | 1.027864127 | 0.730543006 | -0.297321122 | 0.12309093 | 0.26207724  |
| Fam168b    | 91  | 1.049273877 | 1.038620895 | -0.010652983 | 0.12329649 | 0.262461616 |
| Mc4r       | 3   | 16.36363636 | 14.96296296 | -1.400673401 | 0.12330724 | 0.262461616 |
| Zfp784     | 18  | 1.499949495 | 1.051259621 | -0.448689874 | 0.12334124 | 0.262495926 |

|            |     |             |             |              |            |             |
|------------|-----|-------------|-------------|--------------|------------|-------------|
| Rpl22l1    | 57  | 1.143534926 | 0.977071209 | -0.166463717 | 0.1234     | 0.262582887 |
| Rras       | 34  | 1.592025745 | 1.357215435 | -0.23481031  | 0.12350782 | 0.262774219 |
| Mapk6      | 116 | 1.386944378 | 1.337170007 | -0.049774372 | 0.12356063 | 0.262826663 |
| F3         | 56  | 2.710185198 | 2.138950098 | -0.5712351   | 0.12356829 | 0.262826663 |
| Gfod1      | 91  | 1.403905386 | 1.038069905 | -0.365835481 | 0.12360877 | 0.262836566 |
| Zgrf1      | 13  | 0.734661608 | 1.017318178 | 0.28265657   | 0.12359589 | 0.262836566 |
| Otop3      | 3   | 17.45938745 | 13.01084651 | -4.448540936 | 0.12364092 | 0.26286682  |
| Mms19      | 58  | 1.305545058 | 1.396176908 | 0.090631851  | 0.12382413 | 0.263218197 |
| Hip1       | 17  | 2.167748913 | 1.99857991  | -0.169169003 | 0.12386199 | 0.263260558 |
| Cib1       | 36  | 1.487756132 | 1.491228658 | 0.003472526  | 0.12406583 | 0.263655618 |
| Spata5l1   | 55  | 1.199259649 | 1.003918258 | -0.195341391 | 0.12408843 | 0.263665463 |
| Fosl1      | 21  | 0.798119131 | 1.094437808 | 0.296318677  | 0.12423265 | 0.26389547  |
| Pign       | 4   | 1.19760479  | 0.388601036 | -0.809003754 | 0.12421669 | 0.26389547  |
| Chmp1b     | 19  | 1.506262952 | 0.947661321 | -0.558601631 | 0.12431267 | 0.264027228 |
| Ggcx       | 9   | 1.218800943 | 0.934095516 | -0.284705427 | 0.12434427 | 0.264056121 |
| 110033P09F | 9   | 0.615332205 | 1.284750157 | 0.669417952  | 0.12438204 | 0.264098117 |
| Usp47      | 73  | 1.18412012  | 1.014255511 | -0.169864609 | 0.12442134 | 0.264143345 |
| Tbc1d31    | 25  | 2.12979396  | 1.658192842 | -0.471601117 | 0.12450358 | 0.264250412 |
| Ipp        | 39  | 1.536169242 | 1.858812425 | 0.322643183  | 0.12450779 | 0.264250412 |
| Zfp950     | 8   | 3.841773495 | 3.403522576 | -0.438250918 | 0.1245622  | 0.264327663 |
| Abcb1a     | 14  | 2.651019896 | 2.126736395 | -0.524283501 | 0.12467107 | 0.264520435 |
| Ppt2       | 57  | 2.041962798 | 1.683647509 | -0.358315289 | 0.12472824 | 0.264603477 |
| Slc35a1    | 32  | 1.407577813 | 1.429482984 | 0.02190517   | 0.12475144 | 0.264614432 |
| 130033J07R | 14  | 41.46560121 | 42.51304132 | 1.047440112  | 0.12480712 | 0.264694283 |
| Klhl9      | 61  | 1.083112633 | 0.925334634 | -0.157777999 | 0.12520863 | 0.265507437 |
| Mir3100    | 4   | 84.60391865 | 81.8287962  | -2.775122451 | 0.12523563 | 0.265526314 |
| Hivep2     | 59  | 1.353358845 | 1.561378552 | 0.208019707  | 0.12531125 | 0.265648261 |
| Nup107     | 28  | 0.966718309 | 1.421081222 | 0.454362913  | 0.12539163 | 0.265741886 |
| Osr2       | 59  | 3.722346111 | 4.389110386 | 0.666764275  | 0.12538982 | 0.265741886 |
| Gm7102     | 5   | 46.64941346 | 44.35417453 | -2.295238928 | 0.12561576 | 0.26617843  |
| Aph1b      | 5   | 0.11299435  | 0.570179113 | 0.457184763  | 0.12572534 | 0.266372167 |
| Plekha8    | 67  | 1.297644322 | 1.740197233 | 0.442552911  | 0.12582574 | 0.266546392 |
| Serp2      | 64  | 1.73705917  | 1.461445808 | -0.275613362 | 0.12589142 | 0.266647041 |
| Fbxo31     | 26  | 0.850664146 | 1.029793235 | 0.179129089  | 0.12605829 | 0.266947185 |

|            |     |             |             |              |            |             |
|------------|-----|-------------|-------------|--------------|------------|-------------|
| Hist1h4c   | 5   | 2.268617886 | 0.869565217 | -1.399052669 | 0.12606951 | 0.266947185 |
| Tgfb1      | 63  | 1.601536521 | 1.356305806 | -0.245230715 | 0.12618547 | 0.267154176 |
| Isy1       | 37  | 1.486908081 | 1.068027669 | -0.418880412 | 0.12648538 | 0.267750501 |
| Fbxo5      | 56  | 1.554285564 | 1.256315475 | -0.297970089 | 0.12652084 | 0.267786941 |
| Cc2d1a     | 17  | 1.521186262 | 1.700750108 | 0.179563845  | 0.12660602 | 0.267928579 |
| Fhl2       | 41  | 3.378935336 | 2.337348121 | -1.041587215 | 0.12670593 | 0.268101339 |
| Dnajb1     | 87  | 0.957640217 | 1.082216921 | 0.124576704  | 0.12684013 | 0.268342199 |
| Lrrc15     | 25  | 11.08456144 | 11.34070868 | 0.256147246  | 0.12685633 | 0.268342199 |
| Dcaf12     | 18  | 0.894134782 | 1.261151332 | 0.36701655   | 0.12688907 | 0.26837277  |
| Rars2      | 15  | 2.094876014 | 1.325997825 | -0.768878189 | 0.12694004 | 0.268441865 |
| Vash2      | 77  | 1.500493814 | 1.339934135 | -0.160559679 | 0.12711056 | 0.268698316 |
| Ankhd1     | 74  | 1.209596773 | 1.094773397 | -0.114823377 | 0.12708815 | 0.268698316 |
| Dnajc30    | 56  | 1.096219698 | 0.776243216 | -0.319976483 | 0.12711624 | 0.268698316 |
| Slc6a7     | 10  | 21.84471819 | 21.43365441 | -0.411063784 | 0.12720861 | 0.268854836 |
| Nedd4      | 69  | 1.490281311 | 1.165496817 | -0.324784494 | 0.12733523 | 0.269083696 |
| Taf12      | 11  | 0           | 1.100501843 | 1.100501843  | 0.12736832 | 0.269114855 |
| Mir7036b   | 45  | 1.323140068 | 1.237003074 | -0.086136994 | 0.12745186 | 0.269136362 |
| Samd15     | 22  | 1.20232311  | 1.074151047 | -0.128172063 | 0.12744401 | 0.269136362 |
| '00060C20F | 6   | 41.99012667 | 38.43195898 | -3.55816769  | 0.12744225 | 0.269136362 |
| Xlr4a      | 1   | 69.02654867 | 60          | -9.026548673 | 0.12740575 | 0.269136362 |
| '30012K11F | 30  | 2.512755886 | 2.104987575 | -0.407768311 | 0.12753266 | 0.269268231 |
| Slu7       | 22  | 1.505530225 | 1.672909129 | 0.167378905  | 0.12757691 | 0.269322906 |
| Brix1      | 26  | 1.790120898 | 1.464176648 | -0.32594425  | 0.12762865 | 0.269393388 |
| Gps1       | 112 | 1.247189267 | 1.19070326  | -0.056486006 | 0.12768817 | 0.269480248 |
| Gpt2       | 38  | 2.491714334 | 2.082544922 | -0.409169412 | 0.12778184 | 0.269639152 |
| Brd9       | 20  | 1.973085578 | 1.436629714 | -0.536455865 | 0.12798163 | 0.270021911 |
| Mff        | 29  | 1.497654735 | 1.27859656  | -0.219058174 | 0.12809927 | 0.270231259 |
| Rnf25      | 15  | 1.623989001 | 1.614069623 | -0.009919378 | 0.12817751 | 0.270320532 |
| '30579G24F | 5   | 1.471039336 | 0.482983422 | -0.988055914 | 0.12817843 | 0.270320532 |
| '00031P21F | 19  | 1.944140851 | 1.695313326 | -0.248827525 | 0.12825344 | 0.270367393 |
| Gemin2     | 5   | 3.473512517 | 3.580172875 | 0.106660358  | 0.12824263 | 0.270367393 |
| Tcerg1     | 66  | 1.162209145 | 0.991693401 | -0.170515744 | 0.12825592 | 0.270367393 |
| Abhd10     | 14  | 1.278425259 | 1.344237841 | 0.065812582  | 0.12829615 | 0.270413353 |
| Rps20      | 23  | 1.290348164 | 0.790697687 | -0.499650477 | 0.12837894 | 0.270548975 |

|            |     |             |             |              |            |             |
|------------|-----|-------------|-------------|--------------|------------|-------------|
| Rab8b      | 26  | 2.187818212 | 1.792243369 | -0.395574843 | 0.12850113 | 0.27076761  |
| Tmem88b    | 1   | 95.58823529 | 92.01877934 | -3.569455951 | 0.12852525 | 0.270779542 |
| Ndufb10    | 12  | 2.596054365 | 2.09149549  | -0.504558875 | 0.12856976 | 0.270834424 |
| Klhl18     | 30  | 1.379090181 | 1.663430322 | 0.284340141  | 0.12861724 | 0.27087546  |
| Uaca       | 38  | 2.478450099 | 2.127485419 | -0.35096468  | 0.12862616 | 0.27087546  |
| 30548M08f  | 98  | 2.076038897 | 1.785319362 | -0.290719535 | 0.12865041 | 0.270887667 |
| Rad51      | 29  | 1.639236537 | 1.432255478 | -0.206981059 | 0.12869179 | 0.270897054 |
| Dach2      | 10  | 25.10118836 | 23.02110431 | -2.080084058 | 0.1286753  | 0.270897054 |
| Setd8      | 22  | 1.392520002 | 1.153367173 | -0.239152829 | 0.12873013 | 0.270938895 |
| Rogdi      | 39  | 0.923857871 | 1.438711922 | 0.514854051  | 0.12875518 | 0.270952757 |
| Brd4       | 108 | 1.106990664 | 0.940582031 | -0.166408632 | 0.12897071 | 0.27128901  |
| Oaf        | 61  | 1.347844957 | 1.130650278 | -0.21719468  | 0.12898892 | 0.27128901  |
| Gm4971     | 3   | 87.97036615 | 85.01508296 | -2.95528319  | 0.12893806 | 0.27128901  |
| Mettl6     | 7   | 1.694907442 | 2.304957546 | 0.610050104  | 0.12898684 | 0.27128901  |
| Uqcrb      | 3   | 0.687285223 | 0           | -0.687285223 | 0.12900835 | 0.271290995 |
| BC052040   | 6   | 2.199174322 | 0.946115288 | -1.253059034 | 0.1290574  | 0.271355253 |
| Efnb1      | 20  | 21.16758347 | 19.82429836 | -1.343285111 | 0.1291437  | 0.271458901 |
| Ndufv1     | 29  | 4.237376432 | 3.717821232 | -0.519555199 | 0.12913077 | 0.271458901 |
| Phf14      | 56  | 1.523647063 | 1.565347165 | 0.041700102  | 0.12919606 | 0.271530081 |
| Ube2g2     | 70  | 2.41326834  | 1.753135651 | -0.66013269  | 0.12925244 | 0.271609676 |
| Uhrf1bp1   | 52  | 1.222430085 | 1.269405984 | 0.046975899  | 0.12934386 | 0.271762856 |
| Mbnl2      | 6   | 0.975557461 | 2.465578423 | 1.490020961  | 0.12950893 | 0.272070736 |
| Gpi1       | 42  | 11.57466682 | 11.8914517  | 0.316784872  | 0.12965314 | 0.272334696 |
| Arhgap29   | 80  | 21.57459275 | 23.34849211 | 1.773899363  | 0.12979943 | 0.272602952 |
| BC005624   | 34  | 2.135723113 | 1.701164123 | -0.43455899  | 0.12991614 | 0.272809011 |
| Tshz2      | 5   | 0.652212233 | 1.452980785 | 0.800768551  | 0.13008093 | 0.273076908 |
| Tmprss2    | 6   | 29.24262481 | 26.80671604 | -2.435908775 | 0.13007711 | 0.273076908 |
| Kank3      | 12  | 3.512511367 | 2.547430986 | -0.965080381 | 0.13014437 | 0.273171014 |
| Zfp592     | 147 | 1.46531062  | 1.184945858 | -0.280364762 | 0.13016836 | 0.273182274 |
| Depdc1a    | 3   | 1.507069561 | 0.629127428 | -0.877942133 | 0.13030181 | 0.273359792 |
| 130041D05F | 63  | 15.69797194 | 16.93881882 | 1.240846874  | 0.13030616 | 0.273359792 |
| Prpf19     | 45  | 9.272197029 | 8.619994892 | -0.652202137 | 0.13030883 | 0.273359792 |
| Klc1       | 66  | 1.278553287 | 0.883080249 | -0.395473039 | 0.13035666 | 0.273421051 |
| Igf1r      | 149 | 1.160225311 | 1.063482614 | -0.096742697 | 0.130421   | 0.273516893 |

|            |    |             |             |              |            |             |
|------------|----|-------------|-------------|--------------|------------|-------------|
| Aurka      | 14 | 1.397499377 | 1.192678588 | -0.20482079  | 0.13044944 | 0.273537458 |
| Hdac7      | 60 | 1.208398811 | 1.176316223 | -0.032082588 | 0.13047498 | 0.273551914 |
| Ppif       | 67 | 1.303732141 | 1.017806488 | -0.285925654 | 0.13051814 | 0.273603305 |
| Gtf3c3     | 24 | 2.036226934 | 2.671668203 | 0.635441269  | 0.13096342 | 0.274464578 |
| !30400D17F | 9  | 0.364973191 | 1.219674046 | 0.854700855  | 0.13098511 | 0.274464578 |
| Fv1        | 3  | 4.487179487 | 2.164502165 | -2.322677323 | 0.13097212 | 0.274464578 |
| Pan2       | 6  | 0           | 0.744390088 | 0.744390088  | 0.13104102 | 0.274542545 |
| Gm11985    | 3  | 62.15745054 | 57.2623434  | -4.895107136 | 0.13109605 | 0.274618621 |
| Ufsp2      | 4  | 0.252525253 | 1.424590164 | 1.172064911  | 0.13112924 | 0.27464895  |
| Cln5       | 78 | 1.292991362 | 1.375851135 | 0.082859773  | 0.13116626 | 0.274661153 |
| Myo5a      | 25 | 1.223242813 | 0.951226003 | -0.27201681  | 0.13120994 | 0.274661153 |
| Grb2       | 95 | 1.089763061 | 1.177492213 | 0.087729152  | 0.13120921 | 0.274661153 |
| Gdap1l1    | 20 | 21.49369802 | 21.82976256 | 0.336064534  | 0.13118283 | 0.274661153 |
| Ccdc55     | 59 | 1.437492188 | 1.36778986  | -0.069702327 | 0.13124305 | 0.274691273 |
| Slc35c1    | 35 | 2.00112387  | 1.801646581 | -0.199477289 | 0.13130763 | 0.274787239 |
| Arfp1      | 53 | 1.605759501 | 1.649545291 | 0.04378579   | 0.13156471 | 0.275285984 |
| Vps9d1     | 53 | 0.952794969 | 1.051112929 | 0.098317959  | 0.13159812 | 0.275316622 |
| Znhit3     | 11 | 1.536381813 | 1.227656196 | -0.308725617 | 0.1316243  | 0.275332136 |
| Ptpmt1     | 45 | 1.547501474 | 1.182100217 | -0.365401257 | 0.13171099 | 0.275441849 |
| Aqp2       | 5  | 92.24796057 | 90.10843112 | -2.139529447 | 0.13171429 | 0.275441849 |
| Asah1      | 44 | 0.891062419 | 1.042422152 | 0.151359733  | 0.13186438 | 0.275716433 |
| }30175E14F | 4  | 83.46347217 | 81.11034478 | -2.353127387 | 0.13201621 | 0.275994561 |
| Kbtbd3     | 40 | 1.765717771 | 1.684266272 | -0.081451499 | 0.13205117 | 0.276028338 |
| Id2        | 11 | 1.587229067 | 1.476505865 | -0.110723202 | 0.13210317 | 0.276094636 |
| Lrrtm1     | 39 | 58.76952007 | 57.42932109 | -1.340198979 | 0.13212052 | 0.276094636 |
| Dhdh       | 4  | 52.15517241 | 46.73076923 | -5.424403183 | 0.13217868 | 0.27617685  |
| Nup153     | 73 | 1.047634566 | 1.185620976 | 0.13798641   | 0.13229711 | 0.276353663 |
| Npdc1      | 35 | 1.843198279 | 1.782530106 | -0.060668173 | 0.13230097 | 0.276353663 |
| Rad51d     | 10 | 2.434176344 | 1.584776276 | -0.849400067 | 0.13241795 | 0.276553459 |
| Zbtb44     | 70 | 0.944110941 | 1.422829277 | 0.478718336  | 0.13243432 | 0.276553459 |
| Map6       | 64 | 8.18017962  | 8.585609995 | 0.405430374  | 0.13246045 | 0.276568666 |
| Cdh1       | 46 | 6.091384308 | 5.800125321 | -0.291258987 | 0.13258885 | 0.276797385 |
| !00079G21F | 2  | 20.74468085 | 26.92090395 | 6.176223104  | 0.13261546 | 0.276813557 |
| Sdr39u1    | 27 | 2.783955873 | 2.612893568 | -0.171062305 | 0.13275544 | 0.27706632  |

|            |    |             |             |              |            |             |
|------------|----|-------------|-------------|--------------|------------|-------------|
| Zic2       | 86 | 19.99336015 | 19.94957121 | -0.043788942 | 0.13287256 | 0.277173917 |
| Rasgrp4    | 5  | 7.197834323 | 8.107231214 | 0.909396891  | 0.13288255 | 0.277173917 |
| '30056A06F | 79 | 16.22275518 | 17.93620576 | 1.713450582  | 0.13286877 | 0.277173917 |
| Sstr2      | 38 | 2.614486528 | 2.193233349 | -0.421253179 | 0.13287465 | 0.277173917 |
| Vsig2      | 3  | 86.90887344 | 80.09486349 | -6.814009949 | 0.13300342 | 0.277386607 |
| J10111I01R | 25 | 1.716354051 | 1.474122738 | -0.242231313 | 0.1331095  | 0.277568396 |
| '30025D16F | 26 | 1.939534235 | 1.402393369 | -0.537140866 | 0.13312947 | 0.277570587 |
| Pkp4       | 97 | 1.335213974 | 1.501378157 | 0.166164183  | 0.13347746 | 0.278256598 |
| Irak4      | 26 | 1.684188882 | 1.957317605 | 0.273128723  | 0.13383193 | 0.278916319 |
| Slc45a3    | 79 | 1.279260839 | 1.190784624 | -0.088476215 | 0.13383038 | 0.278916319 |
| Ddost      | 53 | 1.487257966 | 1.167180077 | -0.32007789  | 0.13388543 | 0.278988183 |
| Unc119     | 43 | 1.708230937 | 1.316564886 | -0.391666051 | 0.13396332 | 0.279110859 |
| Wiz        | 28 | 2.622476561 | 2.213597937 | -0.408878624 | 0.13399054 | 0.279127938 |
| Aldh16a1   | 9  | 0.962668141 | 1.259742367 | 0.297074227  | 0.1341622  | 0.279445864 |
| Sugct      | 18 | 2.44136404  | 2.053476987 | -0.387887053 | 0.13427843 | 0.279648258 |
| Ids        | 10 | 20.51299747 | 18.06093776 | -2.452059706 | 0.134304   | 0.279661834 |
| Sec11a     | 15 | 0.352468996 | 1.180186924 | 0.827717928  | 0.13455654 | 0.280147931 |
| Snai3      | 7  | 0.700411744 | 1.416691078 | 0.716279335  | 0.13472956 | 0.280423456 |
| Mlec       | 79 | 1.701923945 | 1.435106766 | -0.266817179 | 0.1347271  | 0.280423456 |
| Abcb9      | 50 | 1.977357975 | 1.774117915 | -0.20324006  | 0.13480353 | 0.280423456 |
| Tmem19     | 42 | 1.402209363 | 1.176463829 | -0.225745534 | 0.13480204 | 0.280423456 |
| Fam114a2   | 43 | 1.721396012 | 1.280192887 | -0.441203125 | 0.13477825 | 0.280423456 |
| Mrps15     | 6  | 1.233830637 | 2.032274078 | 0.798443441  | 0.13476024 | 0.280423456 |
| Tmem248    | 59 | 1.093949223 | 0.79663753  | -0.297311693 | 0.13496951 | 0.280728919 |
| Tax1bp1    | 59 | 1.116499665 | 0.947824213 | -0.168675452 | 0.13508948 | 0.280891109 |
| Cdc42ep5   | 6  | 3.605088347 | 2.602801313 | -1.002287034 | 0.13506816 | 0.280891109 |
| Mysm1      | 23 | 0.825213373 | 0.898216418 | 0.073003045  | 0.13510491 | 0.280891109 |
| Mgea5      | 99 | 1.226192199 | 1.343813688 | 0.11762149   | 0.13519787 | 0.28104456  |
| Axin2      | 79 | 1.683759669 | 1.61073264  | -0.073027029 | 0.13537197 | 0.281366616 |
| Bco1       | 5  | 84.7130031  | 85.7913841  | 1.078381007  | 0.13542869 | 0.281444635 |
| Tollip     | 32 | 1.449431576 | 1.090656731 | -0.358774845 | 0.13548403 | 0.281479923 |
| Rcn1       | 65 | 40.32336742 | 38.06633834 | -2.257029086 | 0.13548218 | 0.281479923 |
| Pcca       | 18 | 1.702788094 | 1.049166512 | -0.653621582 | 0.13552784 | 0.281491228 |
| Cd2bp2     | 26 | 12.91862561 | 10.75931862 | -2.159306993 | 0.13552715 | 0.281491228 |



|            |     |             |             |              |            |             |
|------------|-----|-------------|-------------|--------------|------------|-------------|
| Rpl37      | 62  | 1.790352464 | 1.551577692 | -0.238774772 | 0.13567069 | 0.281748039 |
| Gm17769    | 13  | 0.765750087 | 0.614511877 | -0.15123821  | 0.13575159 | 0.281836276 |
| i00009A05F | 35  | 1.499628815 | 1.255025817 | -0.244602998 | 0.1357495  | 0.281836276 |
| Setd4      | 19  | 0.757241697 | 1.38558336  | 0.628341663  | 0.1357792  | 0.281853735 |
| Gdpgp1     | 12  | 1.102421873 | 0.834180144 | -0.268241729 | 0.13581513 | 0.28188843  |
| Mir7076    | 3   | 97.16779503 | 98.12609783 | 0.958302802  | 0.13584292 | 0.281906234 |
| Tgoln1     | 7   | 2.086032926 | 1.690426346 | -0.39560658  | 0.13592963 | 0.282046303 |
| i10015P09F | 19  | 1.729307865 | 1.943974523 | 0.214666659  | 0.1362867  | 0.282747223 |
| Zfp644     | 79  | 1.3535808   | 1.180093485 | -0.173487315 | 0.13635595 | 0.282850891 |
| Tex13a     | 2   | 87.62376238 | 80.93877551 | -6.684986866 | 0.13645416 | 0.28297462  |
| Mbd2       | 99  | 1.132037297 | 0.987484509 | -0.144552788 | 0.13643882 | 0.28297462  |
| Cntfr      | 22  | 8.266280631 | 8.695898027 | 0.429617396  | 0.13653582 | 0.283103943 |
| Zfp280d    | 78  | 1.460241501 | 1.27559208  | -0.184649421 | 0.13657526 | 0.283105722 |
| Mpzl1      | 92  | 1.596707593 | 1.408264186 | -0.188443407 | 0.13657074 | 0.283105722 |
| Arap2      | 59  | 1.179458201 | 0.905750607 | -0.273707594 | 0.13662764 | 0.283174283 |
| Zfp677     | 4   | 12.42166447 | 10.39868209 | -2.022982382 | 0.13671589 | 0.283317175 |
| i30056J06R | 16  | 0.989212008 | 1.192749654 | 0.203537647  | 0.13683799 | 0.283530163 |
| Hhatl      | 15  | 61.43166105 | 60.19262295 | -1.239038098 | 0.13686904 | 0.283554462 |
| Junb       | 56  | 1.35052023  | 1.420492571 | 0.069972341  | 0.13689172 | 0.283561421 |
| Pes1       | 4   | 2.255941078 | 1.813384124 | -0.442556954 | 0.13717801 | 0.284114345 |
| Wdr75      | 45  | 1.214383022 | 1.551902872 | 0.33751985   | 0.1373703  | 0.284444071 |
| Timm10     | 6   | 1.667566129 | 1.825744918 | 0.158178789  | 0.13737598 | 0.284444071 |
| Taf8       | 16  | 1.433175568 | 1.4751552   | 0.041979632  | 0.13758644 | 0.284839657 |
| Gspt1      | 41  | 0.763015951 | 1.238024062 | 0.475008111  | 0.13768009 | 0.284993313 |
| Pnpla6     | 4   | 36.84372798 | 37.18071141 | 0.336983431  | 0.1377222  | 0.285040268 |
| Gm29683    | 22  | 58.94978181 | 60.69633063 | 1.746548826  | 0.13777878 | 0.285092909 |
| Cdk2       | 52  | 1.370477115 | 1.054912797 | -0.315564318 | 0.13778649 | 0.285092909 |
| Bcl10      | 51  | 1.585778014 | 1.250683031 | -0.335094983 | 0.13802532 | 0.285546815 |
| Fam227a    | 27  | 1.455588477 | 1.082119682 | -0.373468796 | 0.13807491 | 0.285609145 |
| Pex11a     | 37  | 1.787155751 | 1.535502528 | -0.251653223 | 0.13829438 | 0.286022787 |
| Flot2      | 61  | 14.35923716 | 13.92294777 | -0.436289384 | 0.13834089 | 0.286078671 |
| Pfkl       | 26  | 1.408203575 | 0.746915331 | -0.661288243 | 0.13836546 | 0.28608915  |
| Foxf1      | 105 | 6.112660244 | 5.786929475 | -0.325730768 | 0.13861046 | 0.286555352 |
| Rnft1      | 42  | 1.364847596 | 1.04762712  | -0.317220475 | 0.13863174 | 0.28655898  |

|          |     |             |             |              |            |             |
|----------|-----|-------------|-------------|--------------|------------|-------------|
| Arrdc3   | 19  | 1.219291185 | 1.497342246 | 0.278051061  | 0.13867183 | 0.286601469 |
| Cstf1    | 20  | 1.665983034 | 1.472703333 | -0.193279702 | 0.13870696 | 0.286633703 |
| Rab3gap2 | 21  | 1.163335837 | 0.937617261 | -0.225718576 | 0.13879686 | 0.286738724 |
| Txn1     | 12  | 0.814802352 | 1.205175373 | 0.390373021  | 0.13879521 | 0.286738724 |
| Fbxw9    | 25  | 1.243716087 | 0.901716894 | -0.341999193 | 0.13890586 | 0.286923513 |
| Ppwd1    | 32  | 1.429579064 | 1.004311458 | -0.425267606 | 0.13897563 | 0.287027225 |
| Cdc14b   | 63  | 1.460833769 | 1.277663997 | -0.183169772 | 0.13917531 | 0.287399167 |
| B3galnt1 | 39  | 13.79034259 | 16.31948878 | 2.529146188  | 0.13935713 | 0.287714313 |
| Ythdf3   | 60  | 1.187847307 | 0.903120634 | -0.284726673 | 0.13936714 | 0.287714313 |
| Ylpm1    | 49  | 1.376385077 | 1.274898361 | -0.101486716 | 0.13945353 | 0.287816875 |
| Tbc1d2   | 21  | 1.428823969 | 0.83099516  | -0.597828809 | 0.13945604 | 0.287816875 |
| Sacm1l   | 56  | 1.413120955 | 1.076474863 | -0.336646092 | 0.13976544 | 0.288414856 |
| Tmem53   | 17  | 0.780965535 | 1.294407074 | 0.513441538  | 0.13986186 | 0.288531172 |
| Bcar3    | 25  | 1.272221621 | 1.505803549 | 0.233581928  | 0.13985859 | 0.288531172 |
| Ube2r2   | 81  | 1.46895813  | 1.599884809 | 0.130926679  | 0.13988079 | 0.288531172 |
| Pex1     | 44  | 1.214559832 | 1.057135372 | -0.15742446  | 0.13993656 | 0.288605641 |
| Fam173a  | 28  | 3.019331334 | 2.202324607 | -0.817006727 | 0.14005151 | 0.288802119 |
| Atp6v1e1 | 34  | 1.452512986 | 1.239964937 | -0.212548049 | 0.14012854 | 0.288847804 |
| Odf2l    | 42  | 1.006535914 | 1.174610428 | 0.168074513  | 0.14009864 | 0.288847804 |
| Phf23    | 113 | 3.138466307 | 2.564395923 | -0.574070384 | 0.14013272 | 0.288847804 |
| Lcorl    | 95  | 1.156257194 | 0.959896274 | -0.19636092  | 0.14027688 | 0.289104343 |
| Canx     | 28  | 1.697161724 | 1.282588817 | -0.414572907 | 0.14033248 | 0.28917831  |
| Plcb3    | 30  | 4.30691701  | 2.985114858 | -1.321802152 | 0.14038803 | 0.289252161 |
| Prdx3    | 9   | 0.984226137 | 1.585626827 | 0.601400691  | 0.1404336  | 0.289305446 |
| Rnf24    | 73  | 1.339293271 | 1.413625565 | 0.074332294  | 0.14047037 | 0.289340573 |
| Icmt     | 91  | 1.201127305 | 1.036799063 | -0.164328242 | 0.1406346  | 0.28963819  |
| Gorab    | 10  | 1.129046455 | 0.625177913 | -0.503868543 | 0.14071845 | 0.289770203 |
| Mkl2     | 142 | 1.424357009 | 1.439719353 | 0.015362344  | 0.14083467 | 0.289968726 |
| Tsta3    | 14  | 1.954974432 | 2.319424875 | 0.364450443  | 0.14087413 | 0.289968726 |
| Rab43    | 84  | 1.536352321 | 1.408334442 | -0.128017879 | 0.14085805 | 0.289968726 |
| Fam20a   | 18  | 5.606328718 | 4.299444083 | -1.306884635 | 0.14106382 | 0.290318447 |
| Cpped1   | 25  | 2.32507475  | 1.639245731 | -0.685829019 | 0.14110634 | 0.29036523  |
| Ascc3    | 89  | 1.334729285 | 1.100200211 | -0.234529074 | 0.14118755 | 0.290410157 |
| Tbx6     | 9   | 19.10233079 | 17.42307872 | -1.679252077 | 0.14118048 | 0.290410157 |

|          |     |             |             |              |            |             |
|----------|-----|-------------|-------------|--------------|------------|-------------|
| Usp32    | 60  | 1.826747287 | 1.317848059 | -0.508899228 | 0.14118215 | 0.290410157 |
| Krt12    | 5   | 96.43736695 | 95.31316876 | -1.124198191 | 0.14135764 | 0.290719265 |
| Anpep    | 11  | 92.11682038 | 90.14560234 | -1.971218033 | 0.14140043 | 0.290766521 |
| Itgav    | 71  | 1.396204864 | 1.206530654 | -0.18967421  | 0.1414723  | 0.290873556 |
| Papss1   | 45  | 1.281331119 | 1.137191385 | -0.144139734 | 0.1415741  | 0.2910013   |
| Zfp397   | 45  | 1.26506524  | 1.439428513 | 0.174363274  | 0.14155904 | 0.2910013   |
| Brox     | 8   | 2.290877523 | 1.46239883  | -0.828478693 | 0.14159901 | 0.291011742 |
| Abcc9    | 5   | 33.1213614  | 28.72821098 | -4.393150412 | 0.14174932 | 0.291274226 |
| Thsd4    | 2   | 84.19644294 | 81.01679595 | -3.179646995 | 0.14176643 | 0.291274226 |
| Fndc5    | 28  | 8.421624313 | 8.120868584 | -0.30075573  | 0.14190157 | 0.291511073 |
| Gorasp2  | 96  | 1.385627041 | 1.154110788 | -0.231516254 | 0.14192802 | 0.291524609 |
| Tpbg     | 17  | 2.185376444 | 1.722113917 | -0.463262527 | 0.1419682  | 0.291566318 |
| Gas2l1   | 39  | 1.873139487 | 1.643165013 | -0.229974474 | 0.142024   | 0.291640095 |
| Ntpcr    | 17  | 4.073666793 | 4.157334001 | 0.083667209  | 0.14215297 | 0.291779737 |
| Trp53rka | 32  | 12.22619199 | 12.75435412 | 0.528162127  | 0.14217154 | 0.291779737 |
| Slc44a1  | 153 | 0.988639993 | 0.954609987 | -0.034030006 | 0.14211237 | 0.291779737 |
| Safb     | 90  | 0.804784032 | 0.684770343 | -0.120013689 | 0.14215939 | 0.291779737 |
| Dna2     | 37  | 0.657086954 | 1.295543142 | 0.638456188  | 0.14225475 | 0.291909697 |
| Cisd1    | 49  | 1.602994271 | 1.108172387 | -0.494821884 | 0.14236068 | 0.292086216 |
| Paip1    | 108 | 1.470583468 | 1.229409362 | -0.241174106 | 0.1423964  | 0.292118664 |
| Oaz2     | 12  | 2.699151023 | 2.252122626 | -0.447028397 | 0.14258834 | 0.292471528 |
| Wac      | 104 | 1.358440592 | 1.028523651 | -0.329916941 | 0.1426309  | 0.292517935 |
| Gm21283  | 3   | 8.159722222 | 6.126600423 | -2.033121799 | 0.1426518  | 0.292519924 |
| Angptl4  | 5   | 1.95029937  | 1.363290175 | -0.587009195 | 0.1429097  | 0.293007807 |
| Ccny     | 78  | 1.408899097 | 1.141107254 | -0.267791843 | 0.1429713  | 0.293093163 |
| Lyp1a1   | 51  | 1.280867624 | 0.913102922 | -0.367764702 | 0.14303209 | 0.293135888 |
| Gm15612  | 62  | 1.507945665 | 1.221825313 | -0.286120353 | 0.1430318  | 0.293135888 |
| Tmsb10   | 28  | 1.233122832 | 1.444738016 | 0.211615184  | 0.14320034 | 0.293439707 |
| Drap1    | 46  | 1.527673196 | 1.376308161 | -0.151365035 | 0.14339018 | 0.293746689 |
| Cntn1    | 15  | 55.25644382 | 58.81118554 | 3.554741723  | 0.143386   | 0.293746689 |
| Pear1    | 10  | 0.565664557 | 1.618484416 | 1.052819859  | 0.14351979 | 0.293971159 |
| Cdkn1b   | 45  | 1.011226673 | 0.766403581 | -0.244823092 | 0.14356194 | 0.294016453 |
| Iba57    | 36  | 0.994497576 | 1.223032434 | 0.228534857  | 0.14395385 | 0.294777944 |
| Zfp707   | 38  | 1.432757124 | 1.445278732 | 0.012521608  | 0.14398804 | 0.294806816 |

|          |     |             |             |              |            |             |
|----------|-----|-------------|-------------|--------------|------------|-------------|
| Cdk8     | 71  | 8.584600637 | 9.153648805 | 0.569048168  | 0.14403689 | 0.2948657   |
| Rmi1     | 80  | 1.168603216 | 1.398336004 | 0.229732788  | 0.14408905 | 0.294871462 |
| Gnai3    | 35  | 1.870033549 | 1.233597094 | -0.636436455 | 0.14408791 | 0.294871462 |
| Cenpf    | 21  | 1.343998503 | 1.28965634  | -0.054342163 | 0.14409999 | 0.294871462 |
| Gtf2ird2 | 54  | 1.205554141 | 1.354988836 | 0.149434694  | 0.14414836 | 0.294929316 |
| Fn1      | 41  | 1.57286728  | 1.391923927 | -0.180943353 | 0.14437549 | 0.295352852 |
| Cmtm3    | 46  | 5.104375829 | 5.032038373 | -0.072337457 | 0.14440367 | 0.295369321 |
| Ralb     | 28  | 1.244188416 | 1.726638961 | 0.482450546  | 0.14443335 | 0.295388848 |
| Hpd1     | 17  | 3.411256767 | 2.729717904 | -0.681538864 | 0.14456687 | 0.295579526 |
| Pex5     | 49  | 1.246576801 | 1.674700156 | 0.428123355  | 0.14455592 | 0.295579526 |
| Rapgef1  | 81  | 2.176015287 | 1.64299443  | -0.533020856 | 0.14465362 | 0.295715681 |
| Elp5     | 44  | 2.414109267 | 2.86804346  | 0.453934193  | 0.14469784 | 0.295764893 |
| Atp5g3   | 49  | 1.320637895 | 1.399170352 | 0.078532456  | 0.14489992 | 0.296136684 |
| Ostf1    | 66  | 1.452335589 | 1.106178135 | -0.346157454 | 0.14501721 | 0.296252607 |
| Nphs2    | 6   | 37.17657649 | 35.4179553  | -1.758621193 | 0.14499072 | 0.296252607 |
| Gm16675  | 33  | 1.686750957 | 1.532228642 | -0.154522315 | 0.14500975 | 0.296252607 |
| Tbc1d4   | 46  | 1.661793768 | 1.450049447 | -0.211744321 | 0.14505663 | 0.296291895 |
| Snrnp40  | 25  | 1.80693888  | 1.391383288 | -0.415555592 | 0.1450911  | 0.296321056 |
| Ten1     | 16  | 1.282879218 | 1.298956176 | 0.016076958  | 0.14518115 | 0.296463703 |
| Brca2    | 32  | 0.996359202 | 1.101533866 | 0.105174664  | 0.14520222 | 0.296465474 |
| Klhdc1   | 35  | 0.835629992 | 0.564836774 | -0.270793218 | 0.14526768 | 0.29655787  |
| Fam53b   | 83  | 1.547015705 | 1.993715794 | 0.446700089  | 0.14534993 | 0.296684497 |
| Map3k1   | 134 | 1.200087754 | 1.189855976 | -0.010231779 | 0.14540094 | 0.296747337 |
| Rps24    | 19  | 0.790786825 | 1.170066897 | 0.379280072  | 0.14546739 | 0.29684168  |
| Pgk1     | 32  | 14.93381948 | 16.28812033 | 1.354300849  | 0.14555306 | 0.296892631 |
| Asun     | 26  | 0.893507531 | 1.517762516 | 0.624254985  | 0.14554327 | 0.296892631 |
| Fbxl3    | 121 | 1.116757249 | 0.947524661 | -0.169232588 | 0.14552699 | 0.296892631 |
| St3gal2  | 12  | 3.985458149 | 3.490881221 | -0.494576928 | 0.14570136 | 0.297153817 |
| Spry2    | 61  | 1.753700888 | 1.27936281  | -0.474338077 | 0.14618476 | 0.298044104 |
| Mfsd9    | 6   | 3.388025023 | 4.708977768 | 1.320952745  | 0.14621825 | 0.298044104 |
| Sh2d3c   | 3   | 23.84340045 | 22.68294294 | -1.160457511 | 0.14621913 | 0.298044104 |
| Proser1  | 33  | 1.268837768 | 1.061430285 | -0.207407484 | 0.1461724  | 0.298044104 |
| Micu1    | 17  | 1.478278632 | 1.376044254 | -0.102234378 | 0.14629038 | 0.298147921 |
| Dhx33    | 34  | 1.271797479 | 1.408729946 | 0.136932466  | 0.14646591 | 0.298464211 |

|          |    |             |             |              |            |             |
|----------|----|-------------|-------------|--------------|------------|-------------|
| Tprn     | 43 | 1.214571875 | 0.874113038 | -0.340458837 | 0.14648771 | 0.298467191 |
| Gin1     | 10 | 3.239640959 | 1.931717043 | -1.307923915 | 0.14651738 | 0.298486191 |
| Desi2    | 14 | 1.91674369  | 1.395129283 | -0.521614407 | 0.14660437 | 0.298621941 |
| Fam179b  | 43 | 1.74653867  | 1.346590742 | -0.399947927 | 0.14671107 | 0.298797806 |
| Aldh2    | 4  | 4.779813634 | 3.019166518 | -1.760647116 | 0.14676834 | 0.298872968 |
| Wdr62    | 51 | 1.268389667 | 1.492958936 | 0.22456927   | 0.14686699 | 0.299032352 |
| Syde1    | 23 | 15.72429856 | 14.38423726 | -1.340061298 | 0.14701332 | 0.299288772 |
| Rpp21    | 23 | 1.422504143 | 1.342712309 | -0.079791834 | 0.14711421 | 0.299411086 |
| Map2k2   | 61 | 1.207334542 | 1.471362611 | 0.264028069  | 0.14711196 | 0.299411086 |
| Cep350   | 38 | 1.207826251 | 0.811956158 | -0.395870093 | 0.14717277 | 0.299481464 |
| Gmip     | 41 | 2.315975436 | 1.938361393 | -0.377614044 | 0.14718961 | 0.299481464 |
| Nop2     | 30 | 1.833944716 | 1.251601278 | -0.582343438 | 0.14731823 | 0.299660057 |
| Chtop    | 8  | 2.531414233 | 2.021585269 | -0.509828965 | 0.147303   | 0.299660057 |
| Zfp40    | 9  | 2.315164561 | 2.002041161 | -0.313123399 | 0.14738337 | 0.29975102  |
| Trim33   | 28 | 0.815433103 | 0.878142099 | 0.062708996  | 0.14748684 | 0.299878322 |
| Gm14164  | 3  | 92.34234234 | 95.75012801 | 3.407785666  | 0.14747543 | 0.299878322 |
| Ucn3     | 2  | 39.8092869  | 34.10204082 | -5.707246083 | 0.14752913 | 0.299922762 |
| BC037704 | 25 | 1.252304074 | 1.104110718 | -0.148193357 | 0.14755506 | 0.299933923 |
| Nbas     | 23 | 1.607641687 | 1.923195181 | 0.315553494  | 0.14763642 | 0.300018574 |
| Tle1     | 48 | 0.972057918 | 0.756925339 | -0.215132578 | 0.1476376  | 0.300018574 |
| Chd6     | 71 | 1.901825651 | 1.626191245 | -0.275634407 | 0.14767507 | 0.300053175 |
| Ppp2r5b  | 12 | 2.886640334 | 2.744184182 | -0.142456152 | 0.14776052 | 0.300143674 |
| Hdac2    | 77 | 1.343190576 | 1.456341655 | 0.113151079  | 0.14775261 | 0.300143674 |
| Cndp2    | 45 | 1.773075265 | 1.829644857 | 0.056569591  | 0.14782861 | 0.300198858 |
| Jup      | 51 | 1.572855705 | 1.266917304 | -0.305938401 | 0.14780989 | 0.300198858 |
| B3gat3   | 31 | 1.509942769 | 2.005788222 | 0.495845453  | 0.14786128 | 0.300223659 |
| Tmbim6   | 38 | 4.011261913 | 3.51491051  | -0.496351403 | 0.14790562 | 0.300272139 |
| Cyb5d2   | 20 | 1.24823379  | 0.873551823 | -0.374681966 | 0.14793851 | 0.300297372 |
| Matr3    | 21 | 0.319035604 | 0.872504487 | 0.553468883  | 0.14831379 | 0.300980834 |
| Hbegf    | 11 | 1.086742449 | 1.249375829 | 0.162633379  | 0.14831623 | 0.300980834 |
| Mrpl12   | 32 | 1.945772366 | 1.559476928 | -0.386295438 | 0.14835663 | 0.301021176 |
| Rapgef4  | 29 | 20.57152054 | 22.08526472 | 1.513744181  | 0.1484302  | 0.30112883  |
| Sowahc   | 24 | 1.232827469 | 1.414127709 | 0.18130024   | 0.14850021 | 0.301187564 |
| Usp33    | 23 | 1.084995643 | 1.306410058 | 0.221414415  | 0.14849378 | 0.301187564 |

|            |     |             |             |              |            |             |
|------------|-----|-------------|-------------|--------------|------------|-------------|
| Tnrc6b     | 48  | 1.091841081 | 1.019958499 | -0.071882582 | 0.14855015 | 0.301247228 |
| Fxyd4      | 1   | 22.3628692  | 17.1875     | -5.175369198 | 0.14872574 | 0.301561633 |
| Dag1       | 109 | 1.568133889 | 1.320410388 | -0.247723501 | 0.14880181 | 0.301632513 |
| Ubxn4      | 46  | 1.056382438 | 1.393781259 | 0.337398821  | 0.14879758 | 0.301632513 |
| Hint3      | 17  | 0.586301339 | 1.230248695 | 0.643947356  | 0.14887268 | 0.301731149 |
| Mir6936    | 51  | 1.193951848 | 0.933475526 | -0.260476322 | 0.14889159 | 0.301731149 |
| Rasa3      | 23  | 0.565007468 | 0.870326715 | 0.305319247  | 0.14899389 | 0.301896765 |
| Gpr88      | 2   | 84.87651332 | 80.73502867 | -4.141484649 | 0.1490723  | 0.301975202 |
| Rps6kb1    | 54  | 1.785123089 | 1.482007142 | -0.303115948 | 0.14907376 | 0.301975202 |
| Ghitm      | 50  | 1.296465195 | 1.155285715 | -0.141117948 | 0.14911125 | 0.302009458 |
| Col5a1     | 40  | 1.406065249 | 0.946545805 | -0.459519444 | 0.14922032 | 0.302188656 |
| Bace2      | 23  | 4.850700898 | 6.14464868  | 1.293947782  | 0.149309   | 0.302326515 |
| Zbtb7b     | 1   | 5.226480836 | 2.857142857 | -2.369337979 | 0.14941774 | 0.302504953 |
| Qrich2     | 1   | 95          | 97.64150943 | 2.641509434  | 0.14947418 | 0.302577483 |
| Scaf1      | 79  | 1.789760732 | 1.93953596  | 0.149775228  | 0.14953246 | 0.30265369  |
| Eif4ebp2   | 83  | 1.363640215 | 1.105431797 | -0.258208417 | 0.14961774 | 0.302784541 |
| Ccdc39     | 7   | 35.68885366 | 39.82758795 | 4.138734292  | 0.14967514 | 0.302858932 |
| Lysmd4     | 14  | 1.393725481 | 2.117168669 | 0.723443188  | 0.14974838 | 0.302943846 |
| Antxr2     | 35  | 1.487356991 | 1.483319961 | -0.004037029 | 0.14975839 | 0.302943846 |
| Mpg        | 44  | 3.048260499 | 2.937341841 | -0.110918659 | 0.1498446  | 0.303076454 |
| Wars2      | 10  | 2.136744089 | 1.486816831 | -0.649927258 | 0.14987728 | 0.303100763 |
| Idh3b      | 25  | 1.021674207 | 1.207061534 | 0.185387327  | 0.14997327 | 0.303253099 |
| Wdr55      | 3   | 1.793721973 | 0.52246604  | -1.271255933 | 0.15004275 | 0.303351784 |
| Cops5      | 28  | 1.258878714 | 1.304923558 | 0.046044844  | 0.15008131 | 0.303387954 |
| Zfp568     | 48  | 0.996520067 | 1.264071751 | 0.267551684  | 0.15013941 | 0.303421802 |
| Hist1h1e   | 34  | 0.94906625  | 1.295554293 | 0.346488043  | 0.15012508 | 0.303421802 |
| Rhobtb3    | 97  | 1.200753274 | 0.935883955 | -0.26486932  | 0.15018474 | 0.303471607 |
| Mtmr3      | 71  | 1.24777086  | 0.928893657 | -0.318877203 | 0.15024804 | 0.303557732 |
| Mrpl23     | 36  | 2.122560627 | 1.826257177 | -0.29630345  | 0.15060337 | 0.304108134 |
| Rpp14      | 4   | 1.108058608 | 0           | -1.108058608 | 0.15056127 | 0.304108134 |
| Ppp2cb     | 72  | 0.691159589 | 0.943221665 | 0.252062076  | 0.1506014  | 0.304108134 |
| 700023F06F | 4   | 95.58807816 | 93.59335501 | -1.994723151 | 0.15057757 | 0.304108134 |
| Sorbs1     | 51  | 1.414739955 | 1.775830736 | 0.361090781  | 0.1506293  | 0.304118642 |
| Pfkfb3     | 72  | 3.713571512 | 3.383228424 | -0.330343089 | 0.15067252 | 0.304164056 |

|            |     |             |             |              |            |             |
|------------|-----|-------------|-------------|--------------|------------|-------------|
| Smn1       | 29  | 1.349664383 | 1.291830793 | -0.05783359  | 0.15085879 | 0.304498191 |
| Bin1       | 36  | 1.606878731 | 1.435713166 | -0.171165565 | 0.15104839 | 0.304797645 |
| Pcid2      | 120 | 0.985343959 | 1.176615776 | 0.191271817  | 0.15104869 | 0.304797645 |
| Ctsf       | 29  | 20.23141922 | 18.60340921 | -1.628010012 | 0.15117661 | 0.304971892 |
| Spag4      | 21  | 1.437191815 | 1.111171881 | -0.326019934 | 0.15117081 | 0.304971892 |
| Arvcf      | 59  | 2.481480272 | 2.47797761  | -0.003502663 | 0.15125099 | 0.305077483 |
| Gm364      | 4   | 90.88579463 | 87.28271778 | -3.603076855 | 0.15127053 | 0.305077483 |
| Med20      | 8   | 0.859834712 | 0.182334833 | -0.677499879 | 0.15134341 | 0.305119393 |
| Secisbp2l  | 34  | 1.377945264 | 1.206044118 | -0.171901146 | 0.1513521  | 0.305119393 |
| Mtch1      | 24  | 1.829598413 | 1.368352765 | -0.461245648 | 0.15135369 | 0.305119393 |
| Msh6       | 45  | 1.532673738 | 1.280059789 | -0.252613949 | 0.15177052 | 0.305900373 |
| Txnrd1     | 68  | 1.412624271 | 1.416667944 | 0.004043673  | 0.15178971 | 0.305900373 |
| Cog1       | 27  | 1.6477068   | 1.127767311 | -0.519939489 | 0.15186617 | 0.305900373 |
| 310428I15R | 22  | 1.36339534  | 1.643408309 | 0.280012969  | 0.15184413 | 0.305900373 |
| Dmxl1      | 65  | 0.81668744  | 0.841710315 | 0.025022875  | 0.15181308 | 0.305900373 |
| Mir190a    | 3   | 77.60502139 | 79.68142968 | 2.076408291  | 0.15184755 | 0.305900373 |
| Rad23b     | 120 | 1.460226803 | 1.187697495 | -0.272529307 | 0.15195959 | 0.30604653  |
| Smim14     | 84  | 1.059601829 | 1.225963025 | 0.166361196  | 0.15249984 | 0.307092444 |
| Racgap1    | 54  | 1.17494988  | 1.290308638 | 0.115358759  | 0.15253955 | 0.307115793 |
| Fkbp1a     | 54  | 1.696973478 | 1.595877659 | -0.101095819 | 0.15255329 | 0.307115793 |
| Kcne1l     | 14  | 58.43224823 | 58.60322468 | 0.170976443  | 0.15264407 | 0.307256388 |
| Gpr156     | 33  | 37.01397123 | 37.45579993 | 0.441828703  | 0.15270139 | 0.307329602 |
| Ubr2       | 52  | 1.443010216 | 1.199080629 | -0.243929587 | 0.15272861 | 0.307342235 |
| Cog2       | 80  | 1.63754957  | 1.690495121 | 0.052945551  | 0.1528032  | 0.30740803  |
| i30005A16F | 22  | 1.726848271 | 1.206622082 | -0.520226189 | 0.15278359 | 0.30740803  |
| Pgm5       | 38  | 16.86277368 | 15.64167383 | -1.221099843 | 0.1528257  | 0.307411151 |
| Ift22      | 4   | 3.006754807 | 1.97790715  | -1.028847657 | 0.15290826 | 0.30753507  |
| Plod2      | 80  | 1.751519035 | 1.617952736 | -0.1335663   | 0.1529908  | 0.30765891  |
| Exosc3     | 20  | 1.450746015 | 1.811569488 | 0.360823473  | 0.1530694  | 0.307774786 |
| Tinf2      | 37  | 1.161675796 | 0.752463341 | -0.409212456 | 0.1531378  | 0.307870135 |
| Ndel1      | 36  | 1.458346501 | 0.804586848 | -0.653759653 | 0.15316687 | 0.307886382 |
| Bcam       | 2   | 23.25206398 | 19.37069422 | -3.88136976  | 0.15337254 | 0.308257579 |
| Sart1      | 65  | 1.068179021 | 0.996387898 | -0.071791123 | 0.15354494 | 0.308561833 |
| Med30      | 40  | 0.680201483 | 0.862686796 | 0.182485313  | 0.15400659 | 0.309447169 |

|            |     |             |             |              |            |             |
|------------|-----|-------------|-------------|--------------|------------|-------------|
| Prim1      | 14  | 2.014630469 | 1.460152052 | -0.554478417 | 0.15413011 | 0.309619215 |
| Ccdc177    | 10  | 12.42427422 | 10.11580642 | -2.308467796 | 0.15413441 | 0.309619215 |
| Dennd6b    | 45  | 1.201574738 | 1.14978807  | -0.051786668 | 0.15416265 | 0.30963356  |
| Armc9      | 33  | 1.843415207 | 2.39284246  | 0.549427253  | 0.15434565 | 0.309958682 |
| Ric8       | 22  | 1.543009708 | 1.306476385 | -0.236533323 | 0.15442716 | 0.310079935 |
| Gabpa      | 65  | 1.157369732 | 1.461049876 | 0.303680144  | 0.15455129 | 0.310286725 |
| Epha7      | 25  | 1.063839887 | 0.796955107 | -0.26688478  | 0.15463262 | 0.310407528 |
| Gli1       | 5   | 3.046052388 | 4.11213676  | 1.066084372  | 0.1547435  | 0.310553896 |
| Plod1      | 32  | 1.347468703 | 1.04475201  | -0.302716694 | 0.15474786 | 0.310553896 |
| Rnf146     | 34  | 1.074837657 | 1.095474686 | 0.02063703   | 0.15493992 | 0.310896806 |
| Hnrnpu     | 74  | 1.042938641 | 1.037371675 | -0.005566965 | 0.15497282 | 0.310920315 |
| Arl13b     | 20  | 1.253458078 | 1.921735519 | 0.668277441  | 0.15512506 | 0.311140663 |
| Nrxn3      | 17  | 43.04222928 | 44.80918876 | 1.766959482  | 0.15512265 | 0.311140663 |
| Ccnd2      | 6   | 10.73268921 | 15.09856631 | 4.365877097  | 0.15515139 | 0.311150951 |
| 2-Mar      | 33  | 1.621496351 | 1.053286681 | -0.56820967  | 0.15519791 | 0.311201703 |
| Dpm3       | 8   | 7.022319612 | 7.48199001  | 0.459670398  | 0.15536642 | 0.311497041 |
| Neur12     | 8   | 2.390822793 | 3.454702973 | 1.06388018   | 0.15552612 | 0.311774621 |
| Ccar2      | 12  | 2.365048287 | 2.346862818 | -0.018185469 | 0.15558727 | 0.311854608 |
| Rpusd2     | 31  | 1.643476653 | 1.197394527 | -0.446082126 | 0.15578802 | 0.312214337 |
| Ap1g1      | 74  | 1.560550559 | 1.252315014 | -0.308235546 | 0.15589543 | 0.312364819 |
| Zfp467     | 42  | 6.918067774 | 6.716606316 | -0.201461458 | 0.15590568 | 0.312364819 |
| Rprd1a     | 19  | 1.705445748 | 1.141653824 | -0.563791924 | 0.15604486 | 0.312600985 |
| Prkaa1     | 125 | 1.151078119 | 1.189664044 | 0.038585925  | 0.15613376 | 0.312722293 |
| Mrgpre     | 4   | 4.85098004  | 3.967243529 | -0.883736511 | 0.15614803 | 0.312722293 |
| Toporsos   | 12  | 1.005532482 | 1.688131137 | 0.682598656  | 0.1562229  | 0.312829529 |
| Slc38a9    | 5   | 2.26665045  | 3.950850967 | 1.684200517  | 0.15625797 | 0.312857062 |
| Lrrc61     | 5   | 1.058201058 | 1.187160563 | 0.128959504  | 0.15631918 | 0.312922562 |
| Icam4      | 5   | 4.128161224 | 3.499438908 | -0.628722316 | 0.15633333 | 0.312922562 |
| Fbxl18     | 21  | 1.419473784 | 1.704609018 | 0.285135234  | 0.15640986 | 0.312994209 |
| Mir5617    | 2   | 57.19211344 | 62.99435028 | 5.80223684   | 0.15641179 | 0.312994209 |
| 133439C10F | 23  | 2.320207017 | 1.373495025 | -0.946711991 | 0.15645486 | 0.313037723 |
| Rnf138     | 92  | 1.161853456 | 1.380099419 | 0.218245963  | 0.15665264 | 0.313390705 |
| Gid4       | 27  | 1.076405493 | 1.096152937 | 0.019747445  | 0.15670518 | 0.313453086 |
| Gstm1      | 2   | 49.16666667 | 44.00224215 | -5.164424514 | 0.15690758 | 0.313815157 |



|            |     |             |             |              |            |             |
|------------|-----|-------------|-------------|--------------|------------|-------------|
| Rpl12      | 35  | 1.13561408  | 1.216952269 | 0.081338189  | 0.15704725 | 0.314041913 |
| Rnd2       | 55  | 19.50567346 | 18.85439412 | -0.651279341 | 0.15708516 | 0.314041913 |
| Ttc30b     | 14  | 1.618401106 | 1.002143898 | -0.616257208 | 0.15708323 | 0.314041913 |
| Dbnl       | 40  | 1.656518335 | 1.295554789 | -0.360963546 | 0.15714219 | 0.314113129 |
| Ap1ar      | 130 | 1.18647612  | 1.301444551 | 0.114968432  | 0.15717319 | 0.314132304 |
| Rbm47      | 36  | 2.172197006 | 1.87840177  | -0.293795236 | 0.15727428 | 0.314291542 |
| 110012O05F | 11  | 0.847982556 | 0.499212072 | -0.348770484 | 0.15729621 | 0.31429256  |
| Nuf2       | 29  | 1.74615321  | 1.302335401 | -0.443817809 | 0.15758308 | 0.314822898 |
| Rwdd3      | 9   | 0.433690013 | 1.666912459 | 1.233222446  | 0.15765606 | 0.314925808 |
| Lrrc59     | 54  | 2.069515712 | 1.477554844 | -0.591960868 | 0.15783487 | 0.3151543   |
| Taf6       | 3   | 2.089390845 | 0.833052232 | -1.256338613 | 0.15782888 | 0.3151543   |
| Map2k5     | 53  | 1.706370418 | 1.426007501 | -0.280362917 | 0.15782259 | 0.3151543   |
| Tacstd2    | 19  | 39.2084909  | 39.97366097 | 0.765170073  | 0.15797186 | 0.315384912 |
| Gm2011     | 3   | 1.078578579 | 2.936536828 | 1.857958249  | 0.15804504 | 0.315448814 |
| Cpeb2      | 132 | 1.327853713 | 1.307565443 | -0.02028827  | 0.15804686 | 0.315448814 |
| Atp7a      | 10  | 19.89731262 | 17.87428288 | -2.023029738 | 0.15811422 | 0.315540331 |
| Parvb      | 29  | 2.482408206 | 2.289239856 | -0.19316835  | 0.15814448 | 0.315557812 |
| Pias4      | 28  | 1.707217361 | 0.872423128 | -0.834794233 | 0.15823858 | 0.315659713 |
| Foxo3      | 86  | 1.435092127 | 1.084047126 | -0.351045001 | 0.15822617 | 0.315659713 |
| Phactr1    | 15  | 45.84795946 | 48.60418632 | 2.756226859  | 0.15835695 | 0.315852904 |
| Tead1      | 62  | 2.509436589 | 2.003704848 | -0.505731741 | 0.15865366 | 0.316401705 |
| Cir1       | 19  | 1.81701506  | 1.013789441 | -0.803225619 | 0.15874402 | 0.316532896 |
| Rtn4       | 80  | 1.726952675 | 1.295754716 | -0.431197959 | 0.15876258 | 0.316532896 |
| Acads      | 37  | 2.042261149 | 2.180673518 | 0.138412369  | 0.15888523 | 0.31673439  |
| Plce1      | 8   | 98.0597761  | 97.39287102 | -0.666905081 | 0.1589847  | 0.316803578 |
| Il23a      | 2   | 42.29901961 | 47.4137931  | 5.114773496  | 0.15895295 | 0.316803578 |
| Irgm2      | 5   | 3.850606909 | 3.676675012 | -0.173931898 | 0.15897863 | 0.316803578 |
| Rsph4a     | 3   | 37.27263436 | 41.89479334 | 4.622158981  | 0.15901751 | 0.316825933 |
| Ccbe1      | 25  | 1.618865961 | 1.130951735 | -0.487914226 | 0.1591685  | 0.317083698 |
| Cmss1      | 11  | 1.081355958 | 0.900871602 | -0.180484355 | 0.15932379 | 0.317349975 |
| Sox15      | 4   | 39.85483401 | 41.11360969 | 1.25877568   | 0.15940193 | 0.31746253  |
| Galc       | 45  | 1.552942705 | 1.545472762 | -0.007469943 | 0.15942401 | 0.317463421 |
| Ppapdc1a   | 51  | 43.07396109 | 43.86578114 | 0.791820051  | 0.15945909 | 0.317490195 |
| Ncald      | 40  | 1.861100619 | 1.54824922  | -0.312851399 | 0.15960747 | 0.31774251  |

|            |     |             |             |              |            |             |
|------------|-----|-------------|-------------|--------------|------------|-------------|
| Grk5       | 45  | 2.035271547 | 1.508476797 | -0.52679475  | 0.15967959 | 0.317842964 |
| Gm16701    | 20  | 1.925903498 | 2.7685041   | 0.842600602  | 0.15995206 | 0.318329333 |
| Rnpep      | 42  | 0.824327365 | 0.926417602 | 0.102090238  | 0.15996732 | 0.318329333 |
| Mtmr14     | 35  | 1.268033238 | 0.899574644 | -0.368458594 | 0.15999282 | 0.318336898 |
| Lpin1      | 42  | 5.989521736 | 5.481697228 | -0.507824508 | 0.16020557 | 0.318716993 |
| Foxn2      | 70  | 1.046402805 | 1.210547099 | 0.164144294  | 0.16025586 | 0.318773823 |
| Ppp6r1     | 48  | 0.912284072 | 0.905076667 | -0.007207405 | 0.16031353 | 0.318845322 |
| Sbk1       | 91  | 1.214830729 | 0.948807185 | -0.266023544 | 0.16033588 | 0.318846546 |
| Apbb1ip    | 13  | 18.32375541 | 15.57934228 | -2.744413121 | 0.1605404  | 0.31921     |
| Tmem62     | 39  | 0.917242833 | 0.946438013 | 0.029195181  | 0.16058615 | 0.31925772  |
| Snora78    | 21  | 1.12694918  | 0.743448722 | -0.383500458 | 0.16068845 | 0.319417821 |
| Mapk1ip1   | 35  | 0.859754741 | 1.047558428 | 0.187803687  | 0.16081791 | 0.319631861 |
| Trem1l1    | 4   | 81.99202174 | 77.72308004 | -4.268941699 | 0.16087233 | 0.319696716 |
| Uap1l1     | 39  | 3.157798856 | 2.629186308 | -0.528612548 | 0.1609571  | 0.319821864 |
| Pex11b     | 36  | 2.310976291 | 1.145287712 | -1.165688579 | 0.16101441 | 0.319849126 |
| Itgb3      | 47  | 1.924667062 | 1.498037103 | -0.426629958 | 0.16100818 | 0.319849126 |
| Cdc42bpa   | 55  | 1.439770615 | 1.49746202  | 0.057691405  | 0.16107395 | 0.319924094 |
| Snora36b   | 2   | 90.08091246 | 83.11543529 | -6.965477169 | 0.16111749 | 0.319926711 |
| Btrc       | 17  | 1.004713469 | 1.472408716 | 0.467695246  | 0.16114184 | 0.319926711 |
| Zcchc4     | 20  | 1.559951565 | 1.011995743 | -0.547955821 | 0.16112297 | 0.319926711 |
| Ddx56      | 14  | 1.189876802 | 0.844025263 | -0.345851539 | 0.16116248 | 0.319926711 |
| St6galnac3 | 7   | 47.31923811 | 49.50432027 | 2.18508216   | 0.16118718 | 0.319932468 |
| Dhrs7b     | 21  | 2.555518415 | 1.520305069 | -1.035213346 | 0.16124997 | 0.319970537 |
| 130579G18F | 6   | 68.97412355 | 67.59040115 | -1.383722404 | 0.16124276 | 0.319970537 |
| Ggn        | 7   | 5.304113028 | 2.995787442 | -2.308325586 | 0.16128561 | 0.319997987 |
| Arid4b     | 51  | 1.65502382  | 1.203568446 | -0.451455374 | 0.16137827 | 0.320138539 |
| Arl14epl   | 3   | 92.67939815 | 89.77260528 | -2.906792868 | 0.16142633 | 0.320190589 |
| Wdr78      | 31  | 0.872361367 | 0.973876102 | 0.101514734  | 0.16148389 | 0.320194369 |
| Aip        | 15  | 1.04770261  | 1.149223035 | 0.101520425  | 0.16147774 | 0.320194369 |
| Scrt2      | 53  | 4.470231053 | 6.850008417 | 2.379777365  | 0.1614937  | 0.320194369 |
| Cdc34      | 101 | 1.106450005 | 1.335517747 | 0.229067742  | 0.16159254 | 0.320347066 |
| Ccnyl1     | 100 | 1.529298212 | 1.288173701 | -0.241124511 | 0.16174032 | 0.320596721 |
| Pdcd5      | 47  | 1.02504202  | 1.167623061 | 0.142581041  | 0.16188422 | 0.320838598 |
| Brip1os    | 39  | 1.055211902 | 0.932401288 | -0.122810614 | 0.16220619 | 0.321389908 |

|            |     |             |             |              |            |             |
|------------|-----|-------------|-------------|--------------|------------|-------------|
| Dock5      | 74  | 1.346660879 | 1.231598269 | -0.11506261  | 0.16219217 | 0.321389908 |
| Pgam5      | 65  | 1.052703972 | 1.182331571 | 0.129627599  | 0.16238729 | 0.321531651 |
| Adprhl2    | 27  | 23.66738313 | 24.75663731 | 1.089254188  | 0.16232788 | 0.321531651 |
| Jak2       | 105 | 0.927950181 | 0.900750126 | -0.027200055 | 0.16236559 | 0.321531651 |
| Mir219b    | 28  | 96.21971826 | 96.60942298 | 0.389704726  | 0.16234511 | 0.321531651 |
| Ssr1       | 105 | 1.247487044 | 1.0754292   | -0.172057844 | 0.16230549 | 0.321531651 |
| Mrps33     | 40  | 0.99074134  | 0.957891485 | -0.032849855 | 0.16265983 | 0.321984394 |
| Acd        | 5   | 1.738437002 | 0.327890882 | -1.410546119 | 0.16264978 | 0.321984394 |
| Fbxl5      | 87  | 0.955605927 | 0.92670931  | -0.028896617 | 0.16270979 | 0.32203986  |
| Eif4enif1  | 144 | 1.331613615 | 1.212189965 | -0.11942365  | 0.16298384 | 0.322538753 |
| H10131K14F | 38  | 0.878278995 | 1.049521608 | 0.171242613  | 0.16303017 | 0.322586935 |
| Abcd4      | 16  | 2.05076136  | 1.336097363 | -0.714663997 | 0.16306754 | 0.322617371 |
| Map3k7     | 59  | 0.706407494 | 0.897166216 | 0.190758722  | 0.163115   | 0.322624284 |
| Rbl2       | 12  | 0.584447229 | 1.17943884  | 0.59499161   | 0.16309413 | 0.322624284 |
| Abhd2      | 28  | 1.870867406 | 1.577189046 | -0.293678361 | 0.16316043 | 0.322670642 |
| Esyt2      | 51  | 0.953533638 | 1.192986727 | 0.239453089  | 0.16319453 | 0.322694597 |
| Slc46a1    | 2   | 0.485436893 | 1.632734003 | 1.14729711   | 0.16343151 | 0.323119646 |
| Tagln2     | 9   | 1.050370835 | 1.806746915 | 0.75637608   | 0.1634775  | 0.323167017 |
| Hspbp1     | 5   | 2.648426404 | 3.130331963 | 0.48190556   | 0.16356035 | 0.323287257 |
| Tmem97     | 20  | 1.667998856 | 1.564453194 | -0.103545662 | 0.16359396 | 0.323310141 |
| Srpr       | 58  | 1.422118449 | 1.085693548 | -0.336424901 | 0.16371249 | 0.323413713 |
| Kcnmb4os1  | 6   | 82.23097812 | 78.91076992 | -3.320208206 | 0.16368248 | 0.323413713 |
| Itpr2      | 40  | 3.233555049 | 3.083876924 | -0.149678125 | 0.16369479 | 0.323413713 |
| Fam150a    | 27  | 19.37727542 | 20.0016937  | 0.624418283  | 0.16377907 | 0.323501686 |
| Cnm2       | 52  | 1.545913404 | 1.599820862 | 0.053907458  | 0.16388558 | 0.323668505 |
| Cdk10      | 29  | 1.479544092 | 1.177238733 | -0.302305359 | 0.16403732 | 0.323924583 |
| 700106J16R | 5   | 22.23690572 | 26.28982129 | 4.052915569  | 0.16405955 | 0.323924897 |
| Olfr550    | 1   | 91.33333333 | 95          | 3.666666667  | 0.16408503 | 0.323931624 |
| Zcchc17    | 5   | 1.760710081 | 2.250555517 | 0.489845437  | 0.16427104 | 0.324255218 |
| Morn2      | 28  | 1.309578851 | 1.727830503 | 0.418251652  | 0.16439046 | 0.324447294 |
| Srms       | 6   | 5.862704215 | 8.584900298 | 2.722196084  | 0.16448363 | 0.324587509 |
| Sdf4       | 58  | 1.121368068 | 1.250574617 | 0.129206549  | 0.16470912 | 0.324945091 |
| Slc35e2    | 35  | 1.279987793 | 0.975704969 | -0.304282824 | 0.16470608 | 0.324945091 |
| Kctd10     | 22  | 1.306243462 | 1.284386386 | -0.021857076 | 0.1648602  | 0.325199432 |

|            |     |             |             |              |            |             |
|------------|-----|-------------|-------------|--------------|------------|-------------|
| Gse1       | 261 | 1.331165337 | 1.148707752 | -0.182457585 | 0.16493037 | 0.32529412  |
| Hspa12b    | 7   | 10.23434283 | 8.856538342 | -1.377804492 | 0.16522464 | 0.325830721 |
| Cyb561     | 83  | 1.667759752 | 1.192325298 | -0.475434455 | 0.1652861  | 0.325908117 |
| Ostc       | 29  | 1.732775321 | 1.622034811 | -0.11074051  | 0.1654055  | 0.326099737 |
| Creb1      | 97  | 1.137114459 | 0.998161229 | -0.13895323  | 0.16563379 | 0.326505941 |
| 30006K02F  | 5   | 11.23608459 | 14.41546855 | 3.179383963  | 0.16576685 | 0.326687779 |
| Msh2       | 42  | 1.299562972 | 1.515596644 | 0.216033672  | 0.16577056 | 0.326687779 |
| Cant1      | 63  | 3.050642436 | 2.804840105 | -0.24580233  | 0.1658715  | 0.326842814 |
| '00019N19F | 1   | 22.58064516 | 17.68488746 | -4.895757701 | 0.16590694 | 0.326868752 |
| Fxn        | 14  | 0.737046913 | 1.233773421 | 0.496726508  | 0.16599206 | 0.326992544 |
| Igsf11     | 49  | 1.345771722 | 1.566733252 | 0.22096153   | 0.16604527 | 0.327009564 |
| Anxa1      | 1   | 5.737704918 | 2.34375     | -3.393954918 | 0.16602972 | 0.327009564 |
| 30032P07F  | 24  | 2.119768733 | 2.28850116  | 0.168732428  | 0.16618576 | 0.327115739 |
| Ddb2       | 9   | 1.845676436 | 1.638147068 | -0.207529367 | 0.16618556 | 0.327115739 |
| Zbed3      | 13  | 0.849733357 | 0.365597495 | -0.484135862 | 0.16615068 | 0.327115739 |
| Krtap3-1   | 2   | 91.59865696 | 88.91333408 | -2.685322886 | 0.16618835 | 0.327115739 |
| Fbxw11     | 94  | 1.23348816  | 1.389602541 | 0.156114381  | 0.16624667 | 0.327150484 |
| Sema4d     | 46  | 1.05183635  | 0.759909421 | -0.291926929 | 0.16625059 | 0.327150484 |
| Ephx3      | 9   | 34.52972108 | 36.95049918 | 2.420778104  | 0.16639049 | 0.327381877 |
| Gmds       | 95  | 1.66537909  | 1.452616331 | -0.212762759 | 0.16646506 | 0.327484686 |
| Elp2       | 11  | 2.236461613 | 1.148359793 | -1.088101821 | 0.16652413 | 0.327556985 |
| Txndc16    | 12  | 1.495217973 | 1.80290485  | 0.307686878  | 0.16668476 | 0.327829008 |
| Il11       | 10  | 20.23798651 | 19.93239675 | -0.305589767 | 0.166725   | 0.327864207 |
| Ndufb7     | 30  | 1.548122565 | 1.548679272 | 0.000556708  | 0.1669699  | 0.328275719 |
| Wipf2      | 26  | 5.052136585 | 4.690743965 | -0.361392619 | 0.16697901 | 0.328275719 |
| Wdr45      | 8   | 17.18288479 | 16.33543663 | -0.847448162 | 0.16703611 | 0.32834398  |
| Lrrc16a    | 59  | 1.290422151 | 1.143889061 | -0.14653309  | 0.16713509 | 0.328494559 |
| Odf2       | 102 | 2.161136125 | 2.360325891 | 0.199189766  | 0.16717249 | 0.328524057 |
| Pank2      | 32  | 0.811433184 | 0.631382162 | -0.180051022 | 0.16738409 | 0.328895845 |
| Cd99l2     | 4   | 24.44255801 | 27.02381192 | 2.581253909  | 0.1675578  | 0.329193083 |
| Zfp36      | 18  | 2.071758754 | 1.459983061 | -0.611775693 | 0.16770522 | 0.32943861  |
| Cluh       | 68  | 1.582818327 | 1.635772248 | 0.05295392   | 0.16775306 | 0.329466453 |
| Ly6d       | 1   | 98.30508475 | 93.44262295 | -4.862461795 | 0.1677643  | 0.329466453 |
| '00113A16F | 47  | 1.239429647 | 1.519648125 | 0.280218477  | 0.16783363 | 0.329514409 |

|            |     |             |             |              |            |             |
|------------|-----|-------------|-------------|--------------|------------|-------------|
| Kirrel2    | 17  | 10.45952516 | 10.99591102 | 0.536385869  | 0.16782044 | 0.329514409 |
| Snf8       | 27  | 1.533139849 | 1.900238948 | 0.367099099  | 0.1680253  | 0.329846584 |
| Fndc3c1    | 17  | 72.93010033 | 71.19557801 | -1.73452232  | 0.16807383 | 0.329889864 |
| Nkx6-3     | 5   | 93.92139888 | 93.09806648 | -0.823332407 | 0.16809231 | 0.329889864 |
| Ap4s1      | 23  | 1.1312175   | 1.469217242 | 0.337999742  | 0.16820103 | 0.330011832 |
| Nid1       | 4   | 27.62428048 | 30.49498055 | 2.870700068  | 0.16819875 | 0.330011832 |
| Htr1f      | 39  | 61.81391487 | 59.03851446 | -2.775400405 | 0.16822192 | 0.330011832 |
| Wdr26      | 137 | 1.569181632 | 1.349176161 | -0.220005471 | 0.16827149 | 0.33006495  |
| Haus2      | 1   | 10.19736842 | 7.235142119 | -2.962226302 | 0.1683244  | 0.330110159 |
| Zfp94      | 11  | 1.176918939 | 0.630514735 | -0.546404204 | 0.16833953 | 0.330110159 |
| Zswim1     | 14  | 0.901958686 | 0.810622035 | -0.091336651 | 0.168413   | 0.330210087 |
| Stamos     | 20  | 1.154829408 | 0.70098702  | -0.453842388 | 0.16859196 | 0.330484417 |
| P2rx2      | 13  | 50.75719527 | 53.80954559 | 3.052350326  | 0.16859795 | 0.330484417 |
| Phlda2     | 29  | 2.119922293 | 1.935427077 | -0.184495217 | 0.16906183 | 0.331349447 |
| Sugp1      | 9   | 3.365145547 | 1.621924389 | -1.743221158 | 0.16913118 | 0.331441103 |
| Siah1b     | 29  | 22.86345962 | 21.96503277 | -0.898426845 | 0.16934751 | 0.331820713 |
| Mest       | 6   | 80.24954191 | 82.01953002 | 1.769988104  | 0.16943212 | 0.33194219  |
| Mir7648    | 19  | 0.571820948 | 1.166297195 | 0.594476247  | 0.16946337 | 0.331959077 |
| Lrrc36     | 8   | 30.1140565  | 34.84450417 | 4.730447667  | 0.16951351 | 0.332012971 |
| Bfar       | 9   | 1.647885328 | 1.786769637 | 0.138884308  | 0.16988595 | 0.332558411 |
| Nkx2-2     | 16  | 50.66591535 | 51.79540463 | 1.129489279  | 0.16986318 | 0.332558411 |
| Usp48      | 6   | 0.64516129  | 1.121130813 | 0.475969523  | 0.16992797 | 0.332558411 |
| 130617003F | 3   | 4.032542405 | 3.03681787  | -0.995724535 | 0.16982698 | 0.332558411 |
| Fgfr1op2   | 32  | 1.210272124 | 0.997596258 | -0.212675866 | 0.16986015 | 0.332558411 |
| Ubxn1      | 22  | 1.404343664 | 1.544763016 | 0.140419352  | 0.1699132  | 0.332558411 |
| Mir6418    | 1   | 11.40939597 | 7.065217391 | -4.344178582 | 0.1699711  | 0.332583878 |
| 7-Mar      | 120 | 1.205076796 | 1.013370711 | -0.191706086 | 0.17003164 | 0.332583878 |
| Upp2       | 144 | 1.427031275 | 1.206740919 | -0.220290355 | 0.17001444 | 0.332583878 |
| Rab12      | 87  | 1.362099941 | 1.179747848 | -0.182352093 | 0.17001192 | 0.332583878 |
| Cebpzoz    | 29  | 1.255820662 | 1.581541985 | 0.325721323  | 0.17012457 | 0.3327213   |
| Gfpt1      | 31  | 1.238337245 | 1.585340947 | 0.347003703  | 0.17027303 | 0.33296728  |
| Mir7688    | 3   | 1.875338753 | 3.50877193  | 1.633433176  | 0.17036109 | 0.33309508  |
| Mir1291    | 3   | 100         | 98.24561404 | -1.754385965 | 0.17050409 | 0.333324185 |
| Snx32      | 27  | 1.762879831 | 1.511466207 | -0.251413624 | 0.17052369 | 0.333324185 |

|            |     |             |             |              |            |             |
|------------|-----|-------------|-------------|--------------|------------|-------------|
| Kdm8       | 26  | 0.852254291 | 0.864941103 | 0.012686811  | 0.17077089 | 0.333727665 |
| Ube2d3     | 46  | 1.543103239 | 1.284424222 | -0.258679017 | 0.17077559 | 0.333727665 |
| Ap1s1      | 28  | 2.143713648 | 1.645458162 | -0.498255486 | 0.17089619 | 0.333829969 |
| Hoxc12     | 25  | 41.63586249 | 46.11439177 | 4.478529275  | 0.17085105 | 0.333829969 |
| Gdpd5      | 47  | 1.340787971 | 1.428649095 | 0.087861124  | 0.17088637 | 0.333829969 |
| Shcbp1     | 11  | 2.100776115 | 1.699366518 | -0.401409597 | 0.17128039 | 0.334535926 |
| Pdlim7     | 18  | 1.741727248 | 1.265978382 | -0.475748866 | 0.17135683 | 0.334640691 |
| h30403K07F | 2   | 14.1156143  | 14.33691756 | 0.221303264  | 0.17161039 | 0.335091267 |
| Yipf3      | 37  | 1.412849733 | 1.01043847  | -0.402411263 | 0.17167582 | 0.335174428 |
| Bbs1       | 18  | 26.42711324 | 26.84375475 | 0.416641515  | 0.17182506 | 0.335395613 |
| Otub1      | 34  | 1.381971268 | 0.974872258 | -0.40709901  | 0.17183482 | 0.335395613 |
| Ppie       | 17  | 2.840927576 | 2.231462779 | -0.609464797 | 0.17186916 | 0.33541801  |
| Dgkz       | 79  | 2.445486057 | 2.271100469 | -0.174385588 | 0.17198025 | 0.335548741 |
| '00001G11F | 52  | 1.432341469 | 1.510045876 | 0.077704407  | 0.17198188 | 0.335548741 |
| Kcnb1      | 71  | 41.42942174 | 41.61110854 | 0.181686799  | 0.17209031 | 0.335715668 |
| Klrg1      | 1   | 93.67088608 | 91.07611549 | -2.59477059  | 0.17221129 | 0.335907014 |
| h10067B10F | 15  | 2.194289452 | 1.995384123 | -0.198905329 | 0.17229778 | 0.336031049 |
| Usf2       | 101 | 1.435112183 | 1.160482926 | -0.274629257 | 0.17246785 | 0.336194056 |
| Brap       | 56  | 1.378208149 | 1.148943121 | -0.229265028 | 0.17243652 | 0.336194056 |
| h10040B10F | 15  | 0.688331929 | 0.757678209 | 0.06934628   | 0.17249152 | 0.336194056 |
| Ltn1       | 39  | 1.187971954 | 1.381168893 | 0.193196939  | 0.17249591 | 0.336194056 |
| h10009A05F | 4   | 0.981395349 | 3.064156697 | 2.082761348  | 0.17240797 | 0.336194056 |
| Morc3      | 81  | 1.207494679 | 1.099421345 | -0.108073334 | 0.17258601 | 0.336280321 |
| Klhl12     | 18  | 2.095402833 | 1.853663329 | -0.241739504 | 0.17257333 | 0.336280321 |
| Slc25a47   | 2   | 94.14893617 | 91.61184211 | -2.537094065 | 0.17275957 | 0.336573815 |
| Dync1li1   | 84  | 1.580695419 | 1.34034859  | -0.240346829 | 0.17281296 | 0.336633134 |
| B9d1       | 14  | 10.36238766 | 9.54229781  | -0.820089855 | 0.17284534 | 0.336651514 |
| Cog6       | 34  | 1.275507671 | 1.019125328 | -0.256382343 | 0.1729299  | 0.336726831 |
| Rassf10    | 71  | 11.95554735 | 13.38504948 | 1.429502137  | 0.17291036 | 0.336726831 |
| Fkbp3      | 30  | 1.373842292 | 0.985375615 | -0.388466677 | 0.17304751 | 0.336866423 |
| Rspo2      | 57  | 28.6303289  | 28.85082021 | 0.220491303  | 0.17302547 | 0.336866423 |
| Palid1     | 60  | 2.267537202 | 1.973037266 | -0.294499936 | 0.17328659 | 0.337287099 |
| Doc2b      | 92  | 23.92130826 | 24.6473046  | 0.725996334  | 0.17333114 | 0.337329066 |
| Dkc1       | 3   | 24.50980392 | 28.17113696 | 3.661333043  | 0.17336886 | 0.337357724 |

|            |     |             |             |              |            |             |
|------------|-----|-------------|-------------|--------------|------------|-------------|
| Cbl11      | 45  | 1.668346401 | 1.386640247 | -0.281706154 | 0.17350442 | 0.337487248 |
| Dner       | 18  | 33.76362759 | 36.02960623 | 2.265978636  | 0.17348594 | 0.337487248 |
| Edf1       | 62  | 1.409508347 | 1.041585786 | -0.367922561 | 0.17348778 | 0.337487248 |
| Zfr2       | 31  | 1.416811696 | 1.145148137 | -0.271663559 | 0.173538   | 0.337507837 |
| Slc48a1    | 39  | 1.749131804 | 1.404536606 | -0.344595198 | 0.17356455 | 0.337514731 |
| 110016F16F | 8   | 2.924533521 | 2.343068141 | -0.58146538  | 0.17362692 | 0.337546564 |
| Derl2      | 33  | 1.180514731 | 0.812688893 | -0.367825837 | 0.17361089 | 0.337546564 |
| Trappc5    | 18  | 2.433639143 | 1.546958993 | -0.886680149 | 0.17366086 | 0.337567809 |
| Hspb6      | 8   | 4.504383104 | 3.475010865 | -1.029372239 | 0.17400872 | 0.338199192 |
| Card10     | 94  | 2.384445329 | 2.092791364 | -0.291653965 | 0.1741869  | 0.338500669 |
| Il12a      | 11  | 61.31753107 | 59.60162401 | -1.715907064 | 0.17421413 | 0.338508759 |
| Klf8       | 10  | 51.94207393 | 54.98196884 | 3.039894911  | 0.17433462 | 0.338698031 |
| Nuak1      | 118 | 1.715188375 | 1.56023144  | -0.154956935 | 0.17464425 | 0.339254664 |
| Edaradd    | 24  | 4.542020773 | 5.874016041 | 1.331995268  | 0.17469862 | 0.339315361 |
| Vps35      | 38  | 1.185904727 | 1.321045456 | 0.135140729  | 0.17478602 | 0.339440182 |
| Snrpa      | 52  | 1.262529616 | 1.090023596 | -0.17250602  | 0.174849   | 0.339517565 |
| Timm23     | 11  | 2.037869884 | 1.441217218 | -0.596652666 | 0.17489686 | 0.339565557 |
| Mrps36     | 39  | 1.279575834 | 1.415484863 | 0.135909029  | 0.17492146 | 0.339566298 |
| Spag9      | 103 | 1.297998699 | 1.120993289 | -0.17700541  | 0.17494352 | 0.339566298 |
| Asph       | 58  | 1.090958088 | 0.982270936 | -0.108687152 | 0.17498092 | 0.339567558 |
| Slc50a1    | 14  | 1.283887317 | 1.092310821 | -0.191576497 | 0.17499045 | 0.339567558 |
| Zfp868     | 12  | 1.094689865 | 1.650900126 | 0.556210261  | 0.17556883 | 0.340644851 |
| Thap4      | 54  | 0.843474867 | 1.044527748 | 0.201052881  | 0.17568877 | 0.340832502 |
| Ppp3cc     | 88  | 0.858584913 | 0.841262915 | -0.017321998 | 0.1760193  | 0.341428588 |
| Scaf11     | 120 | 0.96514591  | 1.005618082 | 0.040472172  | 0.17607367 | 0.341443766 |
| Syne2      | 43  | 1.378502392 | 1.121481393 | -0.257020999 | 0.17607268 | 0.341443766 |
| Siva1      | 19  | 2.344371315 | 1.905834504 | -0.438536811 | 0.17615577 | 0.34155785  |
| Rnf34      | 34  | 1.214521278 | 1.364666361 | 0.150145083  | 0.17627655 | 0.341701724 |
| Dgki       | 62  | 12.08417614 | 12.94029374 | 0.856117608  | 0.17626788 | 0.341701724 |
| Flrt2      | 23  | 20.88958851 | 20.43555654 | -0.454031971 | 0.17651614 | 0.342120975 |
| Erap1      | 31  | 1.872987751 | 1.371636959 | -0.501350792 | 0.17660415 | 0.342246346 |
| Fastkd1    | 8   | 0.908295582 | 0.740532433 | -0.167763148 | 0.17676398 | 0.342510839 |
| Commd5     | 5   | 2.922123559 | 1.697724892 | -1.224398666 | 0.17682643 | 0.342586613 |
| Zbtb8os    | 18  | 0.909792001 | 0.620669353 | -0.289122649 | 0.17701703 | 0.342910604 |

|          |     |             |             |              |            |             |
|----------|-----|-------------|-------------|--------------|------------|-------------|
| Rapgef1  | 116 | 1.438148093 | 1.446536411 | 0.008388318  | 0.17704983 | 0.34292889  |
| Def8     | 19  | 1.636024376 | 2.539575461 | 0.903551085  | 0.17707595 | 0.342934204 |
| Polr2d   | 22  | 0.89194445  | 1.180382931 | 0.288438481  | 0.17716154 | 0.343054699 |
| Inpp5k   | 18  | 1.135504634 | 1.408954688 | 0.273450053  | 0.17719838 | 0.343080747 |
| Zfp961   | 10  | 7.282882248 | 6.644668269 | -0.638213979 | 0.17730962 | 0.343244234 |
| Mrps30   | 38  | 0.97656398  | 1.050502719 | 0.073938739  | 0.1773296  | 0.343244234 |
| Dzip1l   | 6   | 3.618759365 | 5.211846903 | 1.593087538  | 0.17737924 | 0.343295044 |
| Zfp68    | 32  | 1.73125529  | 1.736043666 | 0.004788376  | 0.17753659 | 0.343554261 |
| Kin      | 6   | 1.204819277 | 0.166666667 | -1.03815261  | 0.17761317 | 0.343611817 |
| Mif4gd   | 88  | 1.592418124 | 1.420175474 | -0.17224265  | 0.1775946  | 0.343611817 |
| Slc25a32 | 44  | 1.148132092 | 0.852043097 | -0.296088995 | 0.17767544 | 0.343686974 |
| Zswim8   | 14  | 0.944928263 | 0.917339426 | -0.027588837 | 0.17769991 | 0.343688996 |
| Pomp     | 28  | 0.792811075 | 0.902700668 | 0.109889593  | 0.17773326 | 0.343708209 |
| Lrrc28   | 26  | 1.690239532 | 1.872272287 | 0.182032756  | 0.17780063 | 0.343793188 |
| Calm2    | 36  | 1.245009233 | 1.440509126 | 0.195499892  | 0.17787144 | 0.343884782 |
| Adamts17 | 55  | 2.630403328 | 2.538998843 | -0.091404485 | 0.17811951 | 0.344304776 |
| Unc13b   | 76  | 1.495085319 | 1.365145478 | -0.129939841 | 0.1781356  | 0.344304776 |
| Arntl    | 59  | 1.689856644 | 1.270299583 | -0.419557061 | 0.17828099 | 0.344540405 |
| Egr4     | 83  | 12.3819391  | 12.74227489 | 0.360335786  | 0.17832553 | 0.34458109  |
| Rpl19    | 58  | 6.425321205 | 5.664276684 | -0.761044521 | 0.17840476 | 0.344688801 |
| Dos      | 84  | 1.33498556  | 1.115367539 | -0.219618021 | 0.17850155 | 0.344830404 |
| Pigb     | 23  | 1.152244289 | 0.970608835 | -0.181635455 | 0.17855073 | 0.344879997 |
| Lipt1    | 4   | 2.344367281 | 2.598533293 | 0.254166013  | 0.17867214 | 0.345069093 |
| Lrrc40   | 6   | 1.118859588 | 1.113314162 | -0.005545426 | 0.17873625 | 0.345112302 |
| Ube2c    | 22  | 1.454198258 | 1.081082744 | -0.373115514 | 0.17874155 | 0.345112302 |
| Gclc     | 56  | 1.023251352 | 0.860770997 | -0.162480355 | 0.17879908 | 0.345132554 |
| Spg20    | 47  | 1.307834671 | 1.396860508 | 0.089025837  | 0.17879112 | 0.345132554 |
| Prdm1    | 14  | 1.668484656 | 0.9568325   | -0.711652156 | 0.178848   | 0.345181573 |
| Cdc123   | 10  | 1.429289241 | 2.260290483 | 0.831001242  | 0.17899904 | 0.345364736 |
| Ddx19b   | 27  | 1.113497504 | 0.871180101 | -0.242317403 | 0.17898451 | 0.345364736 |
| Ccbl2    | 22  | 1.519561963 | 1.287978572 | -0.231583391 | 0.17901351 | 0.345364736 |
| Htr5a    | 10  | 24.06294733 | 29.13571692 | 5.072769586  | 0.17909907 | 0.345417552 |
| Trim24   | 48  | 1.295459958 | 0.771014976 | -0.524444982 | 0.17925274 | 0.345417552 |
| Hif1an   | 17  | 1.295521451 | 0.955635208 | -0.339886244 | 0.17921488 | 0.345417552 |



|            |     |             |             |              |            |             |
|------------|-----|-------------|-------------|--------------|------------|-------------|
| Tmed9      | 39  | 1.723025977 | 1.305671973 | -0.417354004 | 0.17923389 | 0.345417552 |
| Abca7      | 23  | 8.754097514 | 7.073142116 | -1.680955398 | 0.17924823 | 0.345417552 |
| Hyal3      | 14  | 1.417877762 | 1.655701255 | 0.237823492  | 0.17922559 | 0.345417552 |
| Lrpap1     | 14  | 1.514365392 | 1.936462236 | 0.422096844  | 0.17919937 | 0.345417552 |
| Lrrc8d     | 154 | 1.828742498 | 1.868445302 | 0.039702804  | 0.17916835 | 0.345417552 |
| Mtpn       | 22  | 1.15478641  | 0.920020023 | -0.234766387 | 0.17910453 | 0.345417552 |
| Ido1       | 18  | 46.24443421 | 47.4078147  | 1.163380494  | 0.17947548 | 0.345785986 |
| Trnau1ap   | 35  | 1.309519748 | 1.251471642 | -0.058048106 | 0.17949106 | 0.345785986 |
| Nup62      | 5   | 1.287128713 | 1.600381151 | 0.313252438  | 0.17957238 | 0.345897226 |
| Snord49a   | 3   | 2.25376875  | 0.649350649 | -1.604418101 | 0.17963937 | 0.345980852 |
| Ccl25      | 2   | 2.980148761 | 1.905885718 | -1.074263043 | 0.17976561 | 0.346133121 |
| Fam58b     | 10  | 1.72370706  | 2.06556665  | 0.34185959   | 0.17974843 | 0.346133121 |
| Rxrg       | 2   | 11.9047619  | 6.779661017 | -5.125100888 | 0.179903   | 0.346310217 |
| Scaper     | 24  | 2.429140455 | 1.601829097 | -0.827311358 | 0.17990478 | 0.346310217 |
| Snopc4     | 15  | 2.846168397 | 2.354510476 | -0.491657921 | 0.18003453 | 0.346423646 |
| Gadd45b    | 41  | 1.617999462 | 1.444719701 | -0.17327976  | 0.18000289 | 0.346423646 |
| Slc35d2    | 27  | 1.870266589 | 1.533046655 | -0.337219935 | 0.180034   | 0.346423646 |
| Clasp2     | 97  | 0.986235422 | 1.002747893 | 0.016512471  | 0.18007479 | 0.346455683 |
| BC031361   | 57  | 1.439549703 | 0.899918764 | -0.539630939 | 0.18025877 | 0.346764189 |
| Pacs1      | 77  | 1.108767665 | 0.91336284  | -0.195404824 | 0.18029493 | 0.346788283 |
| Fstl1      | 28  | 33.22799362 | 35.15134862 | 1.923354995  | 0.18043963 | 0.347021118 |
| Parl       | 24  | 1.425468361 | 1.448815726 | 0.023347365  | 0.18051094 | 0.347112766 |
| Mir190b    | 5   | 67.980482   | 68.08538105 | 0.104899048  | 0.18058415 | 0.347162567 |
| Golga1     | 32  | 1.020004447 | 1.153536152 | 0.133531705  | 0.18057797 | 0.347162567 |
| Clvs2      | 10  | 53.68173706 | 55.49713426 | 1.8153972    | 0.18063045 | 0.347206089 |
| Cep78      | 73  | 0.687465743 | 0.742915279 | 0.055449537  | 0.18068104 | 0.347233508 |
| Ptges3l    | 55  | 0.910274508 | 1.118123734 | 0.207849226  | 0.18069204 | 0.347233508 |
| BC005537   | 78  | 1.627129546 | 1.404004533 | -0.223125013 | 0.18074693 | 0.347293508 |
| Dnttip2    | 46  | 1.155101169 | 0.865140406 | -0.289960763 | 0.18078618 | 0.347319876 |
| Rdh1       | 2   | 33.86656746 | 27.87691604 | -5.989651423 | 0.180808   | 0.347319876 |
| Lap3       | 50  | 3.087318204 | 3.016017308 | -0.071300895 | 0.18086289 | 0.347379851 |
| 732471J01R | 2   | 34.33868763 | 39.07263162 | 4.733943994  | 0.18089337 | 0.347392928 |
| Gm28042    | 11  | 18.01901172 | 18.53548711 | 0.516475387  | 0.18117685 | 0.34784627  |
| Jmjd7      | 11  | 18.01901172 | 18.53548711 | 0.516475387  | 0.18117685 | 0.34784627  |

|            |     |             |             |              |            |             |
|------------|-----|-------------|-------------|--------------|------------|-------------|
| Got1       | 37  | 1.368112506 | 1.253357911 | -0.114754595 | 0.18129619 | 0.348029857 |
| .90002N15F | 163 | 1.085452046 | 1.134580549 | 0.049128503  | 0.1813773  | 0.348140025 |
| Ercc6l2    | 20  | 1.359121133 | 0.974398646 | -0.384722487 | 0.18144408 | 0.348222658 |
| Nom1       | 18  | 1.394551424 | 0.855551365 | -0.53900006  | 0.18156919 | 0.348371632 |
| Wdr38      | 7   | 7.827489655 | 11.06116741 | 3.233677757  | 0.18155104 | 0.348371632 |
| Bhlha9     | 13  | 23.64085206 | 24.61363293 | 0.972780868  | 0.18163006 | 0.348442866 |
| Gm13157    | 2   | 2.173913043 | 3.426406989 | 1.252493946  | 0.18172646 | 0.348582235 |
| Arel1      | 10  | 1.275291566 | 1.664999543 | 0.389707977  | 0.18190411 | 0.348877387 |
| Mme        | 28  | 12.98590207 | 12.7745372  | -0.211364878 | 0.1821248  | 0.349157358 |
| Zbtb3      | 3   | 1.088435374 | 1.621315193 | 0.532879819  | 0.18214526 | 0.349157358 |
| Mtl5       | 45  | 1.161013821 | 1.149369691 | -0.01164413  | 0.18213315 | 0.349157358 |
| Mib2       | 7   | 2.116437958 | 0.840336134 | -1.276101824 | 0.1821019  | 0.349157358 |
| Sco2       | 33  | 2.156145428 | 2.501590497 | 0.345445069  | 0.18225917 | 0.34933007  |
| Rcor3      | 98  | 1.672563286 | 1.572708496 | -0.09985479  | 0.18235785 | 0.349473558 |
| Cdc42ep1   | 74  | 1.824164925 | 1.405634727 | -0.418530198 | 0.18239508 | 0.349499261 |
| Eif3f      | 20  | 1.652236668 | 1.318638906 | -0.333597762 | 0.18242651 | 0.34951385  |
| Ptpa       | 69  | 0.965364274 | 0.996788166 | 0.031423892  | 0.1824641  | 0.349540226 |
| Setdb1     | 11  | 0.32208795  | 0.699221109 | 0.377133159  | 0.1825603  | 0.349678877 |
| Mir6516    | 13  | 6.288858343 | 4.348295373 | -1.94056297  | 0.18261876 | 0.349733172 |
| Gm5434     | 13  | 98.02142272 | 97.63100595 | -0.390416769 | 0.18263632 | 0.349733172 |
| Nit1       | 6   | 2.243589744 | 1.282775769 | -0.960813975 | 0.18273312 | 0.349872882 |
| Nefh       | 36  | 11.68871679 | 11.30861211 | -0.380104675 | 0.182863   | 0.35007589  |
| Pigm       | 33  | 1.188406451 | 1.279403761 | 0.09099731   | 0.18291515 | 0.350130044 |
| Use1       | 13  | 1.324127123 | 1.685458371 | 0.361331248  | 0.18303457 | 0.350312945 |
| Eif6       | 27  | 1.681215037 | 1.468124032 | -0.213091005 | 0.1830601  | 0.350316106 |
| Klk5       | 3   | 27.00812473 | 23.45016954 | -3.557955184 | 0.18309367 | 0.35033467  |
| Il12rb1    | 3   | 54.53832151 | 51.12781955 | -3.410501963 | 0.18332975 | 0.350694917 |
| Siae       | 11  | 1.259106587 | 1.521572019 | 0.262465433  | 0.18332493 | 0.350694917 |
| Lsm10      | 1   | 1.149425287 | 0           | -1.149425287 | 0.18348509 | 0.350854868 |
| Gm14322    | 3   | 50.20131334 | 46.89289805 | -3.308415288 | 0.18348324 | 0.350854868 |
| Tmem98     | 24  | 1.504606571 | 1.345455908 | -0.159150663 | 0.18345998 | 0.350854868 |
| 110109A12F | 21  | 1.265319517 | 1.431256967 | 0.16593745   | 0.18356805 | 0.350956665 |
| Coprs      | 59  | 0.973064811 | 1.054915532 | 0.081850721  | 0.18358616 | 0.350956665 |
| Rps29      | 3   | 0.574712644 | 2.360066834 | 1.78535419   | 0.18367087 | 0.351072853 |

|            |     |             |             |              |            |             |
|------------|-----|-------------|-------------|--------------|------------|-------------|
| Mrpl21     | 8   | 1.909924992 | 1.898250575 | -0.011674417 | 0.18371594 | 0.351113267 |
| Scoc       | 43  | 1.349687735 | 1.241574518 | -0.108113217 | 0.18375038 | 0.351133361 |
| Fads3      | 79  | 1.606766185 | 1.67311866  | 0.066352475  | 0.18391502 | 0.351315498 |
| Spats2     | 107 | 1.205778506 | 1.337190047 | 0.131411541  | 0.18391752 | 0.351315498 |
| Capn7      | 60  | 1.282957117 | 1.305089562 | 0.022132445  | 0.18389374 | 0.351315498 |
| Nanp       | 35  | 1.259230791 | 1.480559756 | 0.221328965  | 0.18395754 | 0.351346206 |
| Gfer       | 51  | 1.114836215 | 1.22106914  | 0.106232925  | 0.18400615 | 0.351393312 |
| Rps6kb2    | 10  | 1.499721735 | 1.518649869 | 0.018928134  | 0.18417662 | 0.351673087 |
| Tmem109    | 19  | 1.122018307 | 1.300738246 | 0.178719939  | 0.18433066 | 0.351921425 |
| Gfm2       | 15  | 0.974724363 | 1.574803518 | 0.600079155  | 0.18438331 | 0.351945413 |
| Orc3       | 12  | 1.643354575 | 1.171451575 | -0.471903    | 0.18439119 | 0.351945413 |
| Orc2       | 48  | 1.709689406 | 1.283618137 | -0.426071269 | 0.18442387 | 0.351962002 |
| Kdm4d      | 7   | 0.592193077 | 1.004474273 | 0.412281196  | 0.18454146 | 0.352094838 |
| Ykt6       | 58  | 1.235766502 | 1.032423432 | -0.20334307  | 0.18452395 | 0.352094838 |
| Prcc       | 35  | 1.729558655 | 1.26528407  | -0.464274586 | 0.1846391  | 0.352235331 |
| Tom11l     | 27  | 5.697460769 | 6.15750493  | 0.460044161  | 0.18478649 | 0.352424871 |
| i00004C02F | 36  | 1.072732451 | 0.615569806 | -0.457162645 | 0.18477583 | 0.352424871 |
| Gcfc2      | 65  | 1.215911069 | 1.027644768 | -0.188266301 | 0.18510565 | 0.352987698 |
| Fbxo33     | 149 | 1.199026301 | 1.081483992 | -0.117542308 | 0.18517113 | 0.353066677 |
| AW146154   | 7   | 0.777633684 | 1.52316042  | 0.745526735  | 0.18523531 | 0.353143163 |
| Tubgcp5    | 11  | 2.036054831 | 1.336071136 | -0.699983695 | 0.18530927 | 0.353192394 |
| MIlt11     | 19  | 2.227828938 | 2.07536993  | -0.152459009 | 0.18529412 | 0.353192394 |
| Tsr3       | 30  | 0.977784158 | 1.12759415  | 0.149809992  | 0.18537994 | 0.353235317 |
| Vps33a     | 24  | 22.00189302 | 22.5970421  | 0.595149073  | 0.18537463 | 0.353235317 |
| Oma1       | 38  | 1.34868415  | 1.477625772 | 0.128941622  | 0.18543048 | 0.353239898 |
| Fam204a    | 15  | 0.742272482 | 0.43765303  | -0.304619452 | 0.18542634 | 0.353239898 |
| AW554918   | 47  | 1.245521515 | 1.414412825 | 0.16889131   | 0.18567282 | 0.353655631 |
| Col2a1     | 48  | 24.50100806 | 25.60721592 | 1.106207859  | 0.18582609 | 0.353901635 |
| Ttf1       | 37  | 1.488974999 | 1.427754228 | -0.061220771 | 0.18596559 | 0.354121352 |
| Csk        | 82  | 5.3181501   | 4.428371506 | -0.889778593 | 0.18610863 | 0.354347736 |
| Opn3       | 32  | 1.287853087 | 1.534210252 | 0.246357165  | 0.18620674 | 0.354488549 |
| Nol10      | 20  | 1.62347843  | 1.588501642 | -0.034976788 | 0.18633396 | 0.354684723 |
| Aldh4a1    | 16  | 1.88548223  | 2.622027228 | 0.736544998  | 0.18647309 | 0.354903511 |
| Exoc7      | 19  | 0.85520083  | 1.633887786 | 0.778686956  | 0.18651313 | 0.354933696 |

|           |     |             |             |              |            |             |
|-----------|-----|-------------|-------------|--------------|------------|-------------|
| Tctn3     | 19  | 1.776949245 | 1.240078403 | -0.536870842 | 0.18655525 | 0.354967808 |
| Prdm9     | 15  | 0.976781955 | 0.476538148 | -0.500243807 | 0.18661912 | 0.355043296 |
| Pgs1      | 41  | 1.828794291 | 1.743570303 | -0.085223988 | 0.18665747 | 0.355070234 |
| Rsph3b    | 10  | 1.480238562 | 1.110785754 | -0.369452808 | 0.18674388 | 0.355188562 |
| Cttnbp2nl | 55  | 1.591862013 | 1.530637439 | -0.061224574 | 0.18680984 | 0.355267967 |
| Kat8      | 6   | 9.309985635 | 7.095428762 | -2.214556873 | 0.18687881 | 0.355353073 |
| Oxld1     | 24  | 1.380928265 | 1.704648661 | 0.323720396  | 0.18696194 | 0.355458729 |
| Pds5a     | 207 | 1.104554659 | 0.956875225 | -0.147679435 | 0.18698282 | 0.355458729 |
| Stip1     | 86  | 1.552222888 | 1.349987066 | -0.202235822 | 0.18701066 | 0.355465593 |
| Cd63      | 54  | 2.170546885 | 1.624422269 | -0.546124617 | 0.18706419 | 0.355521302 |
| Erlin1    | 56  | 1.214214605 | 1.008958423 | -0.205256182 | 0.18710286 | 0.355548738 |
| Atp5e     | 25  | 1.089841715 | 1.330014966 | 0.240173251  | 0.1871929  | 0.355673782 |
| Gpd2      | 66  | 1.860608705 | 1.674445121 | -0.186163584 | 0.1877107  | 0.356611446 |
| Dnajc5    | 59  | 1.047619429 | 1.250346321 | 0.202726892  | 0.18780496 | 0.356744338 |
| Plvap     | 4   | 46.75544278 | 43.32206374 | -3.43337904  | 0.18790707 | 0.356892094 |
| Psors1c2  | 1   | 14.60674157 | 8.8         | -5.806741573 | 0.18797876 | 0.356982058 |
| Skiv2l    | 28  | 0.939514537 | 1.408366487 | 0.468851951  | 0.18818245 | 0.357198522 |
| Naa15     | 67  | 1.44558609  | 1.118599885 | -0.326986205 | 0.18819012 | 0.357198522 |
| Rnmt      | 14  | 2.302352375 | 3.282978029 | 0.980625654  | 0.18814451 | 0.357198522 |
| 30415G19F | 14  | 2.097138038 | 1.416751259 | -0.680386778 | 0.18815068 | 0.357198522 |
| Zfp91     | 5   | 1.549866114 | 0.692127597 | -0.857738517 | 0.18831051 | 0.357334603 |
| Zfp91Cntf | 5   | 1.549866114 | 0.692127597 | -0.857738517 | 0.18831051 | 0.357334603 |
| Mir3082   | 14  | 62.62316284 | 63.85474475 | 1.231581915  | 0.18836128 | 0.35738472  |
| Syp       | 1   | 89.71962617 | 94.68085106 | 4.961224896  | 0.18847595 | 0.357556059 |
| Plekhm3   | 35  | 1.017755305 | 1.310187298 | 0.292431993  | 0.18865234 | 0.357844416 |
| Pim3      | 111 | 1.087661199 | 0.873546371 | -0.214114828 | 0.18881548 | 0.358049617 |
| Smyd4     | 14  | 0.398436515 | 0.796854734 | 0.398418219  | 0.18880624 | 0.358049617 |
| 30408C21F | 88  | 0.712021278 | 0.844744153 | 0.132722875  | 0.18883372 | 0.358049617 |
| Cog5      | 15  | 1.391023867 | 1.675785085 | 0.284761218  | 0.18887183 | 0.358075605 |
| Nek2      | 49  | 1.380887912 | 0.932909937 | -0.447977975 | 0.18894795 | 0.358127386 |
| Catsper2  | 41  | 1.031083437 | 1.241431403 | 0.210347966  | 0.1889394  | 0.358127386 |
| Zfyve26   | 7   | 1.980745706 | 1.466130293 | -0.514615413 | 0.18899572 | 0.358141698 |
| Gpc1      | 127 | 1.585461174 | 1.559130214 | -0.02633096  | 0.18900431 | 0.358141698 |
| Xpa       | 66  | 1.082552079 | 0.970471447 | -0.112080632 | 0.18904428 | 0.358171182 |

|            |     |             |             |              |            |             |
|------------|-----|-------------|-------------|--------------|------------|-------------|
| Msrb1      | 14  | 3.065937771 | 3.200188734 | 0.134250963  | 0.18914927 | 0.358323832 |
| 10025M15f  | 89  | 1.222218535 | 1.338070257 | 0.115851722  | 0.18926911 | 0.358504564 |
| Smc2       | 14  | 1.554577235 | 1.0352415   | -0.519335735 | 0.18929913 | 0.358515151 |
| Ankzf1     | 5   | 1.234567901 | 0.215053763 | -1.019514138 | 0.18939576 | 0.358651874 |
| Anapc1     | 27  | 1.720520546 | 1.819611006 | 0.099090459  | 0.18955319 | 0.358857369 |
| Gm8363     | 6   | 93.167307   | 89.45977275 | -3.707534247 | 0.18953293 | 0.358857369 |
| Ndst2      | 29  | 0.78007949  | 0.86687737  | 0.08679788   | 0.18961794 | 0.358933643 |
| Gm8221     | 3   | 71.91484085 | 75.86018634 | 3.945345486  | 0.18969536 | 0.359033888 |
| Nfatc2ip   | 31  | 1.508842142 | 1.203868177 | -0.304973965 | 0.1897643  | 0.35911805  |
| Fubp3      | 14  | 1.856178054 | 1.418527969 | -0.437650085 | 0.18988814 | 0.35930606  |
| Xxylt1     | 57  | 1.649839065 | 1.232024053 | -0.417815012 | 0.18991506 | 0.359310671 |
| Snx14      | 6   | 1.032908203 | 0.254452926 | -0.778455277 | 0.19001444 | 0.35940601  |
| Arfgef2    | 25  | 1.382170018 | 1.835949405 | 0.453779388  | 0.18999472 | 0.35940601  |
| Ccdc71     | 35  | 1.356851569 | 1.134032141 | -0.222819427 | 0.19013968 | 0.359550223 |
| Fam65c     | 2   | 14.11464273 | 17.46209841 | 3.347455674  | 0.1901385  | 0.359550223 |
| Zdhhc3     | 20  | 1.031537141 | 1.600728539 | 0.569191398  | 0.19027044 | 0.35975111  |
| Gm166      | 7   | 1.48261664  | 2.032590094 | 0.549973454  | 0.19029528 | 0.359751725 |
| Prrc2a     | 66  | 1.29052978  | 1.61438268  | 0.3238529    | 0.19037991 | 0.359865355 |
| Wdr1       | 81  | 1.175759907 | 1.265801336 | 0.090041429  | 0.19044495 | 0.359941935 |
| Pih1d1     | 4   | 1.572327044 | 1.843965306 | 0.271638262  | 0.19050361 | 0.360006428 |
| Coro1b     | 15  | 1.395781488 | 1.430188225 | 0.034406737  | 0.19059733 | 0.360137172 |
| Sc1t1      | 20  | 0.800957424 | 0.648333128 | -0.152624296 | 0.19063042 | 0.360153308 |
| Eva1b      | 9   | 18.87789835 | 16.25904738 | -2.618850979 | 0.19069649 | 0.360193499 |
| Trim11     | 54  | 1.212726066 | 1.075354017 | -0.137372049 | 0.19070078 | 0.360193499 |
| 130111N05F | 17  | 3.299457404 | 2.630207506 | -0.669249898 | 0.19080575 | 0.360345381 |
| 110008L16F | 12  | 1.375804542 | 1.108426461 | -0.267378081 | 0.1908816  | 0.360442235 |
| Arid1a     | 162 | 1.232353566 | 1.246572626 | 0.01421906   | 0.19126222 | 0.361114496 |
| Sf3b1      | 38  | 1.286692042 | 1.48206661  | 0.195374568  | 0.19139251 | 0.361312481 |
| 130027C09F | 17  | 1.213479618 | 0.883446438 | -0.33003318  | 0.19141633 | 0.361312481 |
| Rcl1       | 78  | 1.807181981 | 1.366998092 | -0.44018389  | 0.19161664 | 0.36164406  |
| Crnkl1     | 22  | 1.227002393 | 1.191450129 | -0.035552264 | 0.19166017 | 0.361679689 |
| Crispld2   | 14  | 28.67004027 | 31.27880614 | 2.608765873  | 0.19177617 | 0.361852058 |
| Cd93       | 3   | 63.68845316 | 66.74650966 | 3.058056498  | 0.1918115  | 0.361872192 |
| Scara3     | 44  | 2.413037447 | 1.838199793 | -0.574837654 | 0.19192027 | 0.361981179 |

|            |     |             |             |              |            |             |
|------------|-----|-------------|-------------|--------------|------------|-------------|
| Nupr1l     | 26  | 1.152604217 | 1.123230108 | -0.02937411  | 0.1919096  | 0.361981179 |
| Tbl3       | 19  | 1.581204242 | 1.354118714 | -0.227085527 | 0.19194327 | 0.361981179 |
| Dctn2      | 43  | 1.304245749 | 1.082812583 | -0.221433166 | 0.19196806 | 0.361981402 |
| Zfp839     | 56  | 1.265197092 | 1.158987439 | -0.106209654 | 0.19206998 | 0.362127053 |
| Rab28      | 55  | 1.984198626 | 1.64028617  | -0.343912456 | 0.19244859 | 0.36279427  |
| Hmgb1      | 65  | 1.728297129 | 1.129612527 | -0.598684602 | 0.19273192 | 0.363271391 |
| Snord58b   | 31  | 1.68083756  | 1.261022246 | -0.419815313 | 0.19277595 | 0.363271391 |
| Rpl17      | 31  | 1.68083756  | 1.261022246 | -0.419815313 | 0.19277595 | 0.363271391 |
| Gm14420    | 2   | 10.51136364 | 13.14636554 | 2.635001907  | 0.1928937  | 0.363446608 |
| Dimt1      | 24  | 4.429515654 | 4.747879015 | 0.318363361  | 0.19307308 | 0.363691186 |
| Dmr        | 40  | 1.579026226 | 1.507178367 | -0.071847859 | 0.19306856 | 0.363691186 |
| Csnk1d     | 53  | 1.530284683 | 1.484391107 | -0.045893576 | 0.19315859 | 0.363805556 |
| Snora65    | 1   | 6.25        | 9.333333333 | 3.083333333  | 0.19326648 | 0.363962046 |
| Mirlet7i   | 184 | 1.26654126  | 1.175926687 | -0.090614573 | 0.19331108 | 0.363999323 |
| Cpz        | 14  | 14.72614468 | 11.68204265 | -3.044102033 | 0.19348108 | 0.364272685 |
| I30432K21F | 16  | 1.393046118 | 1.390380323 | -0.002665796 | 0.1939087  | 0.365030944 |
| Mief1      | 40  | 1.214358375 | 1.14289431  | -0.071464064 | 0.19423236 | 0.365593331 |
| Psmb7      | 13  | 1.76694769  | 1.222031131 | -0.544916559 | 0.19429672 | 0.365667577 |
| Cramp1l    | 29  | 1.428871667 | 0.990960174 | -0.437911493 | 0.19446373 | 0.365934945 |
| Upf3b      | 4   | 22.49057111 | 25.43308945 | 2.942518335  | 0.19451549 | 0.365985425 |
| Gpx4       | 74  | 3.405914143 | 3.177745548 | -0.228168595 | 0.1945534  | 0.366009821 |
| Myh9       | 52  | 0.994512769 | 1.078747341 | 0.084234572  | 0.19463197 | 0.366110702 |
| Psmc4      | 73  | 1.41996454  | 1.358020665 | -0.061943875 | 0.19470616 | 0.366203298 |
| Stk38      | 57  | 1.324543573 | 1.24983722  | -0.074706353 | 0.19482979 | 0.366341911 |
| Zmynd11    | 66  | 1.376772656 | 1.143566653 | -0.233206003 | 0.19480574 | 0.366341911 |
| Alg3       | 12  | 2.049296967 | 1.609604265 | -0.439692702 | 0.19497715 | 0.366572029 |
| Tmem117    | 62  | 1.487644335 | 1.160835224 | -0.326809111 | 0.19516457 | 0.366877396 |
| Gcnt4      | 36  | 0.942315536 | 0.814109529 | -0.128206007 | 0.19529376 | 0.367073226 |
| Ubald2     | 23  | 0.759660614 | 1.17194523  | 0.412284616  | 0.19542088 | 0.367124055 |
| Smad3      | 80  | 1.227076214 | 1.079148571 | -0.147927643 | 0.1953662  | 0.367124055 |
| Rae1       | 64  | 1.325057086 | 0.955830474 | -0.369226612 | 0.19540587 | 0.367124055 |
| Snord14a   | 2   | 88.24045634 | 89.98108589 | 1.740629552  | 0.19537265 | 0.367124055 |
| Ldlrad3    | 83  | 1.140669057 | 1.144050782 | 0.003381726  | 0.19552968 | 0.367281428 |
| Tmem5      | 40  | 0.915279075 | 0.607237477 | -0.308041598 | 0.19589308 | 0.367817409 |

|            |     |             |             |              |            |             |
|------------|-----|-------------|-------------|--------------|------------|-------------|
| Ncapg      | 52  | 1.035232298 | 0.825349355 | -0.209882943 | 0.19589596 | 0.367817409 |
| Coro1c     | 105 | 1.128999947 | 1.267523155 | 0.138523208  | 0.19586213 | 0.367817409 |
| Dgkeos     | 4   | 1.502438325 | 0.506756757 | -0.995681568 | 0.19591528 | 0.367817409 |
| !10015D19F | 18  | 1.349547017 | 1.567729928 | 0.218182911  | 0.19620772 | 0.368319307 |
| !10009B15F | 6   | 1.894977169 | 0.386603061 | -1.508374108 | 0.19629032 | 0.368427247 |
| Asns       | 10  | 1.406929412 | 0.964822593 | -0.442106819 | 0.1964391  | 0.368654665 |
| Sec23ip    | 29  | 1.360124942 | 1.572167464 | 0.212042522  | 0.19646173 | 0.368654665 |
| Lsp1       | 2   | 12.54385965 | 7.920792079 | -4.62306757  | 0.19655779 | 0.36878776  |
| Cbfa2t3    | 138 | 6.417169141 | 6.406446616 | -0.010722525 | 0.19660994 | 0.368838446 |
| Avl9       | 66  | 1.177007284 | 0.953336469 | -0.223670815 | 0.19681335 | 0.369099574 |
| Dusp8      | 60  | 2.389831643 | 1.945904011 | -0.443927632 | 0.19684975 | 0.369099574 |
| Map4k1     | 2   | 0.862068966 | 2.564102564 | 1.702033599  | 0.19683179 | 0.369099574 |
| Ccdc61     | 1   | 9.411764706 | 16.21621622 | 6.80445151   | 0.19683984 | 0.369099574 |
| Usp5       | 18  | 2.829534728 | 2.236030913 | -0.593503814 | 0.19715221 | 0.369619463 |
| Gtpbp2     | 13  | 1.088930292 | 1.673748534 | 0.584818242  | 0.19743909 | 0.370110023 |
| Lbx2       | 8   | 15.37728957 | 15.1405077  | -0.236781866 | 0.19746725 | 0.370115525 |
| Ears2      | 10  | 0.786187036 | 1.532220912 | 0.746033876  | 0.19756961 | 0.37026008  |
| Zfp191     | 96  | 1.094666613 | 1.285631868 | 0.190965255  | 0.19761686 | 0.370301333 |
| Cep120     | 58  | 1.535040766 | 1.164401863 | -0.370638903 | 0.19816128 | 0.371173511 |
| Ehhadh     | 15  | 10.08942042 | 9.922952693 | -0.166467723 | 0.19816707 | 0.371173511 |
| Gpr176     | 46  | 23.07381591 | 24.9323486  | 1.858532689  | 0.19822938 | 0.371173511 |
| Amigo1     | 94  | 1.574050887 | 1.290531854 | -0.283519033 | 0.19823407 | 0.371173511 |
| Cldn10     | 13  | 19.72901007 | 18.45581344 | -1.27319663  | 0.19811021 | 0.371173511 |
| Lekr1      | 22  | 1.621648298 | 1.273269738 | -0.348378559 | 0.19820953 | 0.371173511 |
| Gm14137    | 1   | 31.32911392 | 26.70807453 | -4.62103939  | 0.19828208 | 0.371177696 |
| St6galnac4 | 36  | 1.70822406  | 1.713312067 | 0.005088007  | 0.1982869  | 0.371177696 |
| Nelfa      | 37  | 1.227018317 | 0.878793942 | -0.348224375 | 0.19833196 | 0.37121469  |
| Btg1       | 55  | 1.66400147  | 1.264893957 | -0.399107513 | 0.19836018 | 0.371220163 |
| Ppm1a      | 88  | 1.632297848 | 1.231950189 | -0.400347659 | 0.19866251 | 0.37173854  |
| Abhd5      | 93  | 1.148230264 | 0.905881254 | -0.24234901  | 0.19877503 | 0.371901669 |
| Tpp1       | 1   | 5.612244898 | 3.083700441 | -2.528544457 | 0.19883441 | 0.371965337 |
| Klhl36     | 47  | 1.846056277 | 1.832478394 | -0.013577882 | 0.1989513  | 0.372100102 |
| Rad21      | 66  | 1.258923218 | 1.436736858 | 0.17781364   | 0.19895716 | 0.372100102 |
| D8ErtD82e  | 72  | 1.865316548 | 1.261827247 | -0.603489301 | 0.19898971 | 0.372113544 |

|            |    |             |             |              |            |             |
|------------|----|-------------|-------------|--------------|------------|-------------|
| Arhgap10   | 61 | 1.116141337 | 0.996685233 | -0.119456104 | 0.1990765  | 0.372133568 |
| 720483E21F | 9  | 0.912551971 | 0.924096915 | 0.011544944  | 0.19904984 | 0.372133568 |
| Ehd4       | 11 | 1.120861852 | 0.180018002 | -0.94084385  | 0.19905238 | 0.372133568 |
| Dynlrb1    | 12 | 2.217611321 | 2.106379866 | -0.111231454 | 0.19942026 | 0.372728683 |
| Zc2hc1c    | 4  | 22.14631603 | 19.87537205 | -2.270943983 | 0.19948887 | 0.37276197  |
| Hnf1b      | 65 | 2.29270154  | 2.007832157 | -0.284869383 | 0.19948489 | 0.37276197  |
| Aga        | 8  | 0.871656536 | 0.740202412 | -0.131454124 | 0.1997114  | 0.373082768 |
| Eif3i      | 19 | 0.700630882 | 1.08806055  | 0.387429668  | 0.19969019 | 0.373082768 |
| Cers2      | 67 | 1.598491976 | 1.416045922 | -0.182446054 | 0.19980577 | 0.373177963 |
| Fam189b    | 2  | 2.544017418 | 3.903987808 | 1.35997039   | 0.19981322 | 0.373177963 |
| Ly6i       | 2  | 98.37065174 | 94.09722222 | -4.273429517 | 0.19997559 | 0.373433667 |
| Nudt22     | 7  | 7.577187866 | 4.950787691 | -2.626400175 | 0.20007321 | 0.373568434 |
| Ier5l      | 60 | 1.585399901 | 1.254076188 | -0.331323713 | 0.20010817 | 0.373586167 |
| Telo2      | 4  | 1.801794129 | 2.670454545 | 0.868660416  | 0.20027394 | 0.373848083 |
| Zfp770     | 12 | 1.116741622 | 0.68822648  | -0.428515142 | 0.20045387 | 0.374136363 |
| Ndufa8     | 31 | 1.478085643 | 1.518546053 | 0.04046041   | 0.2006594  | 0.374472342 |
| Dcun1d5    | 56 | 1.4721785   | 1.430264739 | -0.041913761 | 0.20087544 | 0.374827852 |
| 700060E02F | 28 | 1.594953493 | 1.182940425 | -0.412013068 | 0.20094396 | 0.374908027 |
| Traf2      | 50 | 1.181454138 | 1.004380583 | -0.177073555 | 0.20109343 | 0.375139208 |
| Sfswap     | 18 | 1.334386879 | 1.107447274 | -0.226939605 | 0.20114826 | 0.375193799 |
| Best3      | 3  | 84.39554055 | 86.30175049 | 1.906209941  | 0.20136295 | 0.375498777 |
| Ggnbp2     | 34 | 1.833174496 | 1.526661081 | -0.306513415 | 0.20134485 | 0.375498777 |
| 130413G21F | 78 | 1.258919503 | 1.368932308 | 0.110012805  | 0.2015854  | 0.375865839 |
| .30034C11F | 6  | 0.985663082 | 1.317173272 | 0.331510189  | 0.20185585 | 0.376322283 |
| Socs1      | 95 | 1.505156848 | 1.31272115  | -0.192435697 | 0.20188534 | 0.376329458 |
| Clcn7      | 25 | 4.900523061 | 5.230278108 | 0.329755046  | 0.20201876 | 0.376530322 |
| Ccdc134    | 38 | 4.473713681 | 3.49664456  | -0.97706912  | 0.20212801 | 0.37663828  |
| Acss2      | 37 | 1.174608054 | 1.403970689 | 0.229362635  | 0.20210988 | 0.37663828  |
| Naa60      | 47 | 1.763786981 | 1.123203473 | -0.640583508 | 0.20237631 | 0.377053072 |
| Lyzl4      | 44 | 6.825082961 | 7.552749251 | 0.72766629   | 0.20253653 | 0.377291688 |
| Tpgs2      | 63 | 1.309187151 | 1.12930411  | -0.179883041 | 0.20255581 | 0.377291688 |
| Ppil6      | 8  | 0.792202804 | 0.285388128 | -0.506814676 | 0.20264293 | 0.377384282 |
| Yeats2     | 41 | 1.112541687 | 1.215675676 | 0.103133989  | 0.20265695 | 0.377384282 |
| Tnfrsf1b   | 5  | 2.545743618 | 1.447653374 | -1.098090244 | 0.20274022 | 0.377491438 |



|             |     |             |             |              |            |             |
|-------------|-----|-------------|-------------|--------------|------------|-------------|
| Nudcd1      | 24  | 1.609881761 | 1.136124569 | -0.473757192 | 0.20325244 | 0.378397144 |
| Fchsd2      | 85  | 1.329255298 | 1.488946675 | 0.159691377  | 0.20383375 | 0.379431236 |
| Piezo1      | 88  | 3.423176505 | 3.191113353 | -0.232063151 | 0.2040823  | 0.37980953  |
| Cdc45       | 11  | 1.349251867 | 0.701379313 | -0.647872554 | 0.20408874 | 0.37980953  |
| t(ROSA)26Sc | 88  | 1.29357614  | 1.249953074 | -0.043623066 | 0.20414368 | 0.37986361  |
| Nek9        | 38  | 1.160799597 | 1.077424205 | -0.083375391 | 0.20422394 | 0.379921169 |
| Cs          | 47  | 1.09022388  | 1.649852354 | 0.559628474  | 0.2042264  | 0.379921169 |
| Mir343      | 3   | 99.65277778 | 98.66666667 | -0.986111111 | 0.20427779 | 0.379955784 |
| Osbp        | 111 | 1.116976822 | 1.181482632 | 0.06450581   | 0.20432269 | 0.379955784 |
| Nudt5       | 16  | 1.740058182 | 2.087985848 | 0.347927666  | 0.20431479 | 0.379955784 |
| Ppat        | 29  | 1.361979706 | 1.369853531 | 0.007873825  | 0.20442061 | 0.38008971  |
| Smcr8       | 17  | 1.312832346 | 1.08713072  | -0.225701626 | 0.20457775 | 0.380333696 |
| Plekhg3     | 45  | 0.826382475 | 1.044717396 | 0.218334921  | 0.20469738 | 0.380507896 |
| H2afx       | 62  | 1.110067398 | 0.960151012 | -0.149916386 | 0.20473412 | 0.380527981 |
| Eprs        | 68  | 1.184706171 | 1.424287411 | 0.23958124   | 0.20479974 | 0.380601743 |
| Snd1        | 30  | 1.699912445 | 1.505464786 | -0.194447659 | 0.20497667 | 0.38087642  |
| Rab11a      | 24  | 1.56785955  | 1.10236854  | -0.46549101  | 0.20499945 | 0.38087642  |
| Fam84a      | 18  | 3.94564027  | 3.586069233 | -0.359571037 | 0.20502808 | 0.380881383 |
| Appl1       | 67  | 0.962451895 | 0.775749592 | -0.186702303 | 0.20505796 | 0.38088867  |
| AU019823    | 7   | 0.313971743 | 1.019572553 | 0.705600811  | 0.20508559 | 0.380891776 |
| Dnph1       | 41  | 1.769837187 | 1.599511654 | -0.170325533 | 0.20514309 | 0.380950353 |
| Ppp1r13b    | 111 | 3.723336007 | 3.439240322 | -0.284095685 | 0.20524342 | 0.381049307 |
| Cdkl1       | 26  | 1.833375139 | 2.174237368 | 0.340862229  | 0.20524831 | 0.381049307 |
| Erc1        | 45  | 1.231754745 | 1.524929019 | 0.293174274  | 0.20552791 | 0.381520117 |
| Fanca       | 14  | 0.72504116  | 1.166696306 | 0.441655146  | 0.20558288 | 0.381573896 |
| Itpa        | 19  | 1.847274539 | 1.567823141 | -0.279451398 | 0.20567225 | 0.381691482 |
| Cep152      | 48  | 1.01154538  | 1.212878537 | 0.201333157  | 0.20596135 | 0.382179677 |
| Pcdhgb4     | 5   | 55.72097797 | 58.75248383 | 3.031505865  | 0.20603359 | 0.382265381 |
| Naa50       | 84  | 0.981188573 | 1.207693209 | 0.226504635  | 0.20631684 | 0.382742525 |
| Lrrc4b      | 5   | 5.79697142  | 5.533263033 | -0.263708387 | 0.20635828 | 0.382771006 |
| Rtbdn       | 26  | 15.4147838  | 14.92359601 | -0.491187786 | 0.20656958 | 0.383114511 |
| Abcf1       | 15  | 1.193351451 | 0.549178305 | -0.644173146 | 0.2067364  | 0.383375455 |
| Eef2k       | 23  | 3.87534772  | 2.562017206 | -1.313330514 | 0.20685351 | 0.383544158 |
| Mir219c     | 44  | 1.447940931 | 1.212150236 | -0.235790694 | 0.20688076 | 0.383546206 |

|            |     |             |             |              |            |             |
|------------|-----|-------------|-------------|--------------|------------|-------------|
| Anapc2     | 5   | 1.456858117 | 1.866784723 | 0.409926606  | 0.2069762  | 0.383561001 |
| Hsp90ab1   | 44  | 1.041228966 | 1.212257764 | 0.171028799  | 0.20695325 | 0.383561001 |
| Kif20a     | 23  | 1.255360501 | 1.231278091 | -0.02408241  | 0.2069241  | 0.383561001 |
| Ccdc50     | 26  | 0.92248789  | 1.105006523 | 0.182518633  | 0.20699329 | 0.383561001 |
| Prmt10     | 11  | 1.582262576 | 1.231132202 | -0.351130375 | 0.20709854 | 0.38370757  |
| Rpl7l1     | 12  | 1.348404504 | 0.793776402 | -0.554628103 | 0.2072624  | 0.383962685 |
| '00105P06F | 64  | 1.199311867 | 1.290855638 | 0.091543771  | 0.20734164 | 0.384060996 |
| Nup50      | 115 | 0.969465835 | 1.138632202 | 0.169166367  | 0.20746498 | 0.38420065  |
| Pou2f2     | 12  | 1.934041077 | 1.1066433   | -0.827397777 | 0.2074694  | 0.38420065  |
| Rpf1       | 56  | 1.17928828  | 1.350248427 | 0.170960147  | 0.20759126 | 0.384377804 |
| Pgam1      | 40  | 0.801290875 | 0.853252688 | 0.051961813  | 0.20765665 | 0.384450368 |
| Tubgcp4    | 52  | 1.375921769 | 1.41402338  | 0.038101612  | 0.20820588 | 0.385418575 |
| Gm1821     | 11  | 0.199194745 | 0.779568085 | 0.580373341  | 0.20842513 | 0.385727125 |
| Ubb        | 11  | 0.199194745 | 0.779568085 | 0.580373341  | 0.20842513 | 0.385727125 |
| Nhp2l1     | 52  | 0.86813252  | 0.675916151 | -0.19221637  | 0.20848511 | 0.385789476 |
| Trp53tg5   | 1   | 91.89189189 | 88.12785388 | -3.764038011 | 0.20858953 | 0.38588538  |
| Tbc1d9b    | 31  | 0.978738424 | 0.667069361 | -0.311669063 | 0.20857716 | 0.38588538  |
| Tubb5      | 30  | 1.073137012 | 1.274023258 | 0.200886246  | 0.20869949 | 0.386040131 |
| Lmbrd1     | 20  | 1.364158521 | 1.463954488 | 0.099795967  | 0.20891794 | 0.386395501 |
| Myl4       | 10  | 1.740443366 | 1.047548512 | -0.692894854 | 0.20951509 | 0.387451089 |
| 00029M09f  | 50  | 1.536762981 | 1.273570429 | -0.263192552 | 0.20970364 | 0.387729024 |
| Ubxn6      | 43  | 1.591690513 | 1.583128486 | -0.008562027 | 0.20974465 | 0.387729024 |
| Bnip3      | 19  | 3.862982144 | 2.513866056 | -1.349116088 | 0.20973463 | 0.387729024 |
| Pdgfrb     | 3   | 27.14502385 | 24.09747008 | -3.047553776 | 0.20981485 | 0.387809937 |
| Dyrk3      | 44  | 1.111969093 | 0.990187894 | -0.121781199 | 0.20993565 | 0.387886646 |
| Spock1     | 55  | 53.50479239 | 51.89512281 | -1.609669572 | 0.20989177 | 0.387886646 |
| Acadm      | 29  | 1.900253009 | 1.344447717 | -0.555805291 | 0.20991157 | 0.387886646 |
| Adamts10   | 17  | 1.196659305 | 1.450408612 | 0.253749307  | 0.20998852 | 0.387887443 |
| Homer3     | 64  | 1.414746735 | 1.261996869 | -0.152749866 | 0.20998895 | 0.387887443 |
| Sephs1     | 74  | 1.360836219 | 1.17410581  | -0.186730409 | 0.21005782 | 0.387965828 |
| Lhx2       | 98  | 10.47992914 | 11.08074614 | 0.600817009  | 0.21021049 | 0.388198941 |
| Fam101a    | 7   | 15.51023855 | 18.0609298  | 2.550691243  | 0.21026368 | 0.388248303 |
| Ucn        | 16  | 42.32511408 | 43.49142428 | 1.166310203  | 0.21044067 | 0.388526219 |
| Zfp655     | 61  | 0.896562975 | 1.065569185 | 0.169006211  | 0.21048328 | 0.388556    |

|            |     |             |             |              |            |             |
|------------|-----|-------------|-------------|--------------|------------|-------------|
| Naglu      | 16  | 1.578625646 | 1.58468977  | 0.006064124  | 0.21067029 | 0.388852315 |
| Slc20a2    | 69  | 1.334970728 | 1.177577187 | -0.15739354  | 0.21070015 | 0.388858502 |
| Hspa4      | 65  | 1.470157137 | 1.180715495 | -0.289441642 | 0.21080438 | 0.389001952 |
| Slc7a6     | 81  | 1.489788106 | 1.484719635 | -0.005068471 | 0.21092059 | 0.389167444 |
| Emc9       | 13  | 1.454854961 | 1.756017809 | 0.301162848  | 0.21097627 | 0.389221252 |
| BC004004   | 35  | 8.739421103 | 7.902671316 | -0.836749786 | 0.21120458 | 0.389348744 |
| Lrrc45     | 10  | 1.4873017   | 2.014909334 | 0.527607633  | 0.21113514 | 0.389348744 |
| Ak3        | 40  | 1.021536704 | 1.024498774 | 0.002962071  | 0.21109046 | 0.389348744 |
| Ift57      | 9   | 1.375661376 | 1.743289948 | 0.367628573  | 0.21120224 | 0.389348744 |
| Stra13     | 10  | 1.4873017   | 2.014909334 | 0.527607633  | 0.21113514 | 0.389348744 |
| Ino80b     | 16  | 1.47914825  | 0.762175603 | -0.716972647 | 0.21119585 | 0.389348744 |
| Zc3hav1    | 33  | 0.571765763 | 0.957753612 | 0.385987848  | 0.21138751 | 0.389621062 |
| Dip2b      | 94  | 1.962205387 | 2.079827525 | 0.117622138  | 0.2114054  | 0.389621062 |
| Clps       | 7   | 95.27298851 | 91.23089735 | -4.042091152 | 0.21145803 | 0.38966912  |
| Utp20      | 15  | 1.528122692 | 1.288301341 | -0.239821352 | 0.21162791 | 0.389933201 |
| Dmbx1      | 31  | 6.007896154 | 5.437676332 | -0.570219822 | 0.21171262 | 0.390040303 |
| Chka       | 50  | 1.903354494 | 1.325087893 | -0.578266601 | 0.21174865 | 0.390057711 |
| Lrrc71     | 5   | 79.54462165 | 78.24910409 | -1.29551756  | 0.21185592 | 0.390109878 |
| '00042G07F | 6   | 96.76844556 | 97.76507973 | 0.996634162  | 0.21185673 | 0.390109878 |
| Mlh3       | 7   | 2.657156335 | 3.383932301 | 0.726775966  | 0.21182315 | 0.390109878 |
| Cdkn2d     | 56  | 1.898952838 | 1.399814326 | -0.499138512 | 0.21201638 | 0.390354872 |
| E2f3       | 122 | 1.653993136 | 1.439688924 | -0.214304212 | 0.21221265 | 0.390667221 |
| Tln1       | 34  | 1.983181216 | 1.354747227 | -0.628433989 | 0.21244717 | 0.391049905 |
| Apip       | 16  | 1.116768806 | 1.606614917 | 0.489846112  | 0.21276772 | 0.391590802 |
| Uqcc1      | 8   | 0.691573034 | 1.143350628 | 0.451777594  | 0.21279991 | 0.391600945 |
| Chd7       | 138 | 0.894716489 | 0.934594381 | 0.039877892  | 0.21294827 | 0.391824813 |
| Otud6b     | 24  | 1.157341077 | 1.288528191 | 0.131187115  | 0.21300452 | 0.391846818 |
| Slc9a8     | 39  | 1.263147051 | 1.332877673 | 0.069730622  | 0.21303631 | 0.391846818 |
| Zscan20    | 16  | 1.730749292 | 1.68248503  | -0.048264262 | 0.21304034 | 0.391846818 |
| Celf2      | 10  | 23.4313016  | 22.46627641 | -0.965025189 | 0.21309161 | 0.391892005 |
| Kcna5      | 10  | 32.50872322 | 36.83089304 | 4.322169821  | 0.21318488 | 0.392014402 |
| Cenpj      | 31  | 1.253485939 | 1.443618657 | 0.190132719  | 0.21335913 | 0.392285667 |
| Ddx46      | 66  | 1.555338765 | 1.292127748 | -0.263211017 | 0.21346197 | 0.392425584 |
| L30008F23F | 12  | 1.776610361 | 2.229765921 | 0.45315556   | 0.21388492 | 0.393153873 |

|          |     |             |             |              |            |             |
|----------|-----|-------------|-------------|--------------|------------|-------------|
| Osbp11   | 88  | 1.309499424 | 1.171329582 | -0.138169842 | 0.21398017 | 0.393279685 |
| Kif16bos | 4   | 6.744480502 | 9.690163582 | 2.94568308   | 0.2140357  | 0.393332476 |
| Abcb10   | 80  | 1.383537603 | 1.148336141 | -0.235201462 | 0.21409662 | 0.393395174 |
| Dopey1   | 107 | 1.462770496 | 1.331792831 | -0.130977666 | 0.21413804 | 0.393422018 |
| Ncl      | 21  | 1.549858164 | 1.244425212 | -0.305432952 | 0.21440719 | 0.393867196 |
| Fhod1    | 30  | 1.752086694 | 1.406415247 | -0.345671447 | 0.21444024 | 0.393878596 |
| Sae1     | 33  | 1.074611741 | 0.836071736 | -0.238540005 | 0.21452625 | 0.393987265 |
| Epm2aip1 | 15  | 1.081452199 | 0.709885756 | -0.371566444 | 0.21455917 | 0.393998402 |
| Mcm7     | 12  | 2.224586415 | 1.973988678 | -0.250597738 | 0.21465808 | 0.394130436 |
| Fzd7     | 28  | 1.372280174 | 1.76237672  | 0.390096546  | 0.21468479 | 0.394130436 |
| Wipi2    | 63  | 0.930807754 | 1.188685245 | 0.257877491  | 0.2150406  | 0.394722316 |
| Zfp65    | 2   | 2.667140825 | 5.931855501 | 3.264714676  | 0.21506099 | 0.394722316 |
| B4galt7  | 20  | 2.112529188 | 1.609577964 | -0.502951225 | 0.21530249 | 0.394891859 |
| Slc26a6  | 26  | 1.873832017 | 1.437632523 | -0.436199493 | 0.21528483 | 0.394891859 |
| Mtmr6    | 30  | 2.695569577 | 2.18953986  | -0.506029717 | 0.21525186 | 0.394891859 |
| Sh3bp5   | 25  | 1.70552841  | 1.197263537 | -0.508264873 | 0.21531483 | 0.394891859 |
| Ttll13   | 4   | 2.755762129 | 1.968808357 | -0.786953772 | 0.21525788 | 0.394891859 |
| Zfp938   | 6   | 2.689949249 | 2.777442272 | 0.087493023  | 0.21522503 | 0.394891859 |
| Pten     | 142 | 1.596588883 | 1.414796958 | -0.181791925 | 0.21564169 | 0.395441906 |
| Rasl12   | 8   | 8.175770308 | 9.732110673 | 1.556340365  | 0.21569881 | 0.395497223 |
| Faap20   | 11  | 1.849350459 | 1.355539865 | -0.493810594 | 0.21580445 | 0.395641488 |
| Nup43    | 2   | 1.041666667 | 4.411764706 | 3.370098039  | 0.21590428 | 0.395775061 |
| Slc26a5  | 11  | 23.10096898 | 21.73117898 | -1.369790001 | 0.21596093 | 0.39582947  |
| Psm14    | 29  | 1.713113655 | 1.424792436 | -0.288321219 | 0.21630473 | 0.396410096 |
| Kxd1     | 40  | 1.316020145 | 1.229874112 | -0.086146033 | 0.21634103 | 0.396427115 |
| Akr1e1   | 4   | 3.253112899 | 2.787964796 | -0.465148104 | 0.21639672 | 0.396430142 |
| Otud3    | 65  | 1.396905496 | 1.25916782  | -0.137737676 | 0.21639508 | 0.396430142 |
| Ush1g    | 24  | 28.76973505 | 27.22846316 | -1.541271894 | 0.21657875 | 0.396714084 |
| Senp5    | 46  | 1.602941651 | 1.253472766 | -0.349468885 | 0.21667684 | 0.39684423  |
| Rfx8     | 35  | 35.57376003 | 35.09235062 | -0.481409408 | 0.21672807 | 0.396888522 |
| Hook2    | 12  | 1.511728068 | 1.012852113 | -0.498875955 | 0.21704041 | 0.397410896 |
| Gm15217  | 2   | 82.06293596 | 73.04304534 | -9.019890616 | 0.21716379 | 0.397587209 |
| Naca     | 19  | 0.785990553 | 0.805411985 | 0.019421432  | 0.21733373 | 0.397848691 |
| Gadd45a  | 30  | 0.674602819 | 1.004564348 | 0.329961528  | 0.21744639 | 0.398005275 |

|            |     |             |             |              |            |             |
|------------|-----|-------------|-------------|--------------|------------|-------------|
| Upf1       | 56  | 0.853995193 | 0.942159695 | 0.088164502  | 0.21758374 | 0.398207018 |
| Ptges3     | 67  | 1.075103798 | 0.895920218 | -0.17918358  | 0.217664   | 0.398304211 |
| Hivep1     | 95  | 1.036473477 | 0.798904331 | -0.237569146 | 0.21787469 | 0.398590345 |
| Zfyve1     | 39  | 1.871393605 | 1.738809348 | -0.132584257 | 0.21785782 | 0.398590345 |
| Dusp7      | 95  | 1.284707169 | 1.244767714 | -0.039939455 | 0.21793972 | 0.398659526 |
| Nolc1      | 41  | 1.214316647 | 0.933526326 | -0.28079032  | 0.21796684 | 0.398659526 |
| Egln1      | 171 | 1.459553665 | 1.346626308 | -0.112927358 | 0.2180591  | 0.398778561 |
| Zfp42      | 8   | 89.74502687 | 89.01055508 | -0.734471788 | 0.21811636 | 0.398833585 |
| Cdt1       | 26  | 1.365670405 | 1.045005062 | -0.320665342 | 0.21834489 | 0.399201717 |
| 10013P06F  | 96  | 1.272372915 | 1.341584107 | 0.069211192  | 0.21855968 | 0.399517239 |
| Tgfbra1    | 7   | 0.429645542 | 0.824944308 | 0.395298766  | 0.21860655 | 0.399517239 |
| Pih1h3b    | 9   | 52.19334628 | 49.77628264 | -2.417063637 | 0.21862637 | 0.399517239 |
| Pdxk       | 37  | 1.773881818 | 2.213702965 | 0.439821147  | 0.21862179 | 0.399517239 |
| Rtfdc1     | 21  | 1.884187747 | 1.329336434 | -0.554851313 | 0.21871065 | 0.39962147  |
| Dpy19l1    | 166 | 1.307885563 | 1.106767961 | -0.201117602 | 0.21882867 | 0.399747114 |
| Arl4c      | 142 | 1.212217608 | 1.061667112 | -0.150550496 | 0.21886114 | 0.399747114 |
| L10004F10F | 22  | 11.31273799 | 11.701721   | 0.388983005  | 0.21883935 | 0.399747114 |
| Coq3       | 35  | 1.551144479 | 1.676845131 | 0.125700652  | 0.21894927 | 0.39985831  |
| Acsl3      | 83  | 1.021190674 | 1.059822528 | 0.038631854  | 0.2190479  | 0.399938886 |
| Utp14b     | 83  | 1.021190674 | 1.059822528 | 0.038631854  | 0.2190479  | 0.399938886 |
| Nup188     | 20  | 1.632994292 | 1.152612789 | -0.480381503 | 0.21916105 | 0.400095702 |
| Gnb2l1     | 30  | 1.586354957 | 1.466853276 | -0.119501681 | 0.21918879 | 0.40009656  |
| Naa30      | 97  | 1.548513898 | 1.381307411 | -0.167206486 | 0.21923307 | 0.400127623 |
| Smyd5      | 19  | 1.632274598 | 1.091104907 | -0.541169691 | 0.21936477 | 0.400318192 |
| Igsf3      | 87  | 1.507821519 | 1.533580207 | 0.025758688  | 0.21951985 | 0.400551397 |
| Abca9      | 3   | 26.6093613  | 30.57251908 | 3.963157781  | 0.21962788 | 0.400685094 |
| Olfr329-ps | 1   | 98.42105263 | 96.55172414 | -1.869328494 | 0.21964774 | 0.400685094 |
| Ambp       | 3   | 86.96640256 | 83.54964651 | -3.416756043 | 0.21980089 | 0.400914636 |
| Epas1      | 59  | 2.769433532 | 2.683461609 | -0.085971923 | 0.22009056 | 0.401393108 |
| Iqck       | 41  | 1.265988438 | 1.179265494 | -0.086722944 | 0.22024746 | 0.401579436 |
| Gorasp1    | 10  | 1.411850856 | 2.156016567 | 0.744165711  | 0.22024276 | 0.401579436 |
| Exd2       | 5   | 0.516150516 | 1.760935143 | 1.244784627  | 0.22043714 | 0.401875335 |
| Pofut1     | 52  | 1.121168433 | 1.005464433 | -0.115704    | 0.22053793 | 0.402009146 |
| Asf1a      | 70  | 1.298514045 | 1.044963023 | -0.253551022 | 0.22062877 | 0.402124775 |

|            |     |             |             |              |            |             |
|------------|-----|-------------|-------------|--------------|------------|-------------|
| Clpp       | 12  | 1.527736344 | 1.248120899 | -0.279615445 | 0.22066769 | 0.402145757 |
| Ubxn2b     | 31  | 1.568435151 | 1.374286067 | -0.194149084 | 0.22075054 | 0.402246794 |
| Nfkbid     | 2   | 11.44932238 | 6.027170788 | -5.422151588 | 0.22094881 | 0.402558082 |
| Rhebl1     | 15  | 1.687658922 | 1.060044321 | -0.627614601 | 0.22103394 | 0.402663197 |
| Trip11     | 31  | 1.025405083 | 1.231274465 | 0.205869382  | 0.22161311 | 0.403668168 |
| Eif2d      | 6   | 2.071404404 | 1.923863834 | -0.147540571 | 0.22164929 | 0.403683953 |
| Nabp2      | 11  | 1.640258068 | 1.976065339 | 0.335807271  | 0.22171134 | 0.403746853 |
| Hsd11b2    | 53  | 1.956073111 | 1.906488219 | -0.049584892 | 0.2218252  | 0.403853977 |
| Hmgcs1     | 43  | 1.433217106 | 1.126154108 | -0.307062998 | 0.22181078 | 0.403853977 |
| Vipas39    | 8   | 0.887483995 | 1.954098471 | 1.066614476  | 0.22233786 | 0.404686897 |
| Tnip1      | 3   | 92.88218872 | 95.24928519 | 2.36709647   | 0.22233682 | 0.404686897 |
| Cntrob     | 9   | 0.991508771 | 0.78998102  | -0.20152775  | 0.22244077 | 0.404723607 |
| Mtmr1      | 37  | 15.86188884 | 15.29940807 | -0.562480774 | 0.22244067 | 0.404723607 |
| Ttc13      | 38  | 1.897062966 | 1.487694776 | -0.409368191 | 0.22239336 | 0.404723607 |
| Zfp646     | 19  | 1.113896215 | 2.00063659  | 0.886740375  | 0.22250586 | 0.404791843 |
| '00120K04F | 22  | 90.26819223 | 90.63681768 | 0.368625442  | 0.22262651 | 0.404961126 |
| Atl3       | 46  | 1.626893697 | 1.869807579 | 0.242913882  | 0.22266372 | 0.404978614 |
| Dbt        | 19  | 2.540449469 | 1.873547661 | -0.666901808 | 0.222738   | 0.405029354 |
| 30020J21R  | 18  | 1.073365779 | 1.28669517  | 0.213329391  | 0.22274682 | 0.405029354 |
| Fdxacb1    | 30  | 1.479726687 | 1.251430512 | -0.228296175 | 0.22279187 | 0.40506108  |
| Wdr70      | 36  | 1.067419738 | 1.215579268 | 0.14815953   | 0.22291936 | 0.405242657 |
| 30025E21R  | 22  | 1.060670245 | 1.065984181 | 0.005313936  | 0.22300544 | 0.405348911 |
| Sphkap     | 2   | 10.78431373 | 8.928571429 | -1.855742297 | 0.22310307 | 0.405476161 |
| Nfix       | 136 | 1.781915377 | 1.167934404 | -0.613980973 | 0.22326736 | 0.405724492 |
| Grip1os2   | 3   | 70.09801193 | 74.68797565 | 4.589963717  | 0.22344375 | 0.405994757 |
| Nr2c1      | 25  | 1.425755169 | 1.524525834 | 0.098770665  | 0.22349982 | 0.406004864 |
| Carhsp1    | 51  | 1.881196241 | 1.623907398 | -0.257288843 | 0.22350465 | 0.406004864 |
| Aen        | 28  | 0.638908271 | 1.098825202 | 0.45991693   | 0.22362592 | 0.406174863 |
| Fbxw7      | 107 | 5.321330288 | 5.573806775 | 0.252476487  | 0.22388512 | 0.406595329 |
| Mafg       | 106 | 1.429090405 | 1.283502415 | -0.14558799  | 0.2239903  | 0.406736004 |
| Myd88      | 17  | 2.748279669 | 1.917169544 | -0.831110126 | 0.22405332 | 0.406800095 |
| Hgh1       | 55  | 3.384333668 | 3.184441175 | -0.199892493 | 0.22410617 | 0.406845724 |
| Errfi1     | 69  | 1.251899904 | 1.209509827 | -0.042390077 | 0.22423913 | 0.407036731 |
| Xpo4       | 60  | 1.071281896 | 1.100925493 | 0.029643597  | 0.22438122 | 0.407244277 |

|           |     |             |             |              |            |             |
|-----------|-----|-------------|-------------|--------------|------------|-------------|
| Arfrp1    | 26  | 1.807532508 | 1.878322255 | 0.070789747  | 0.22480126 | 0.407956181 |
| Sucla2    | 60  | 1.43639042  | 1.239316679 | -0.197073741 | 0.22483287 | 0.407963098 |
| Mllt4     | 155 | 1.506732459 | 1.187456587 | -0.319275872 | 0.22491536 | 0.408011859 |
| Ube2e1    | 63  | 1.373729009 | 1.16664386  | -0.207085149 | 0.22489514 | 0.408011859 |
| Cstf2     | 63  | 20.4273744  | 19.11660504 | -1.310769353 | 0.22497158 | 0.40801297  |
| Mitd1     | 20  | 1.06511099  | 1.137135468 | 0.072024478  | 0.22494488 | 0.40801297  |
| 30102H24F | 104 | 1.337464159 | 1.143888993 | -0.193575166 | 0.22518637 | 0.408352043 |
| Glmn      | 22  | 1.257652948 | 0.969049584 | -0.288603364 | 0.22555245 | 0.408965356 |
| Myo1d     | 56  | 1.574719205 | 1.405990752 | -0.168728452 | 0.22599704 | 0.409720855 |
| Nkiras1   | 43  | 1.508518217 | 1.336029177 | -0.17248904  | 0.22609668 | 0.409850859 |
| Eif5b     | 106 | 1.148623607 | 1.306847405 | 0.158223798  | 0.22617315 | 0.409938835 |
| Col25a1   | 9   | 50.12048648 | 54.61919916 | 4.498712679  | 0.22621838 | 0.409970168 |
| Cdan1     | 62  | 1.192278233 | 0.887169951 | -0.305108282 | 0.22625889 | 0.409992959 |
| Fkbp8     | 32  | 2.172957431 | 1.996610382 | -0.176347049 | 0.22630113 | 0.410018867 |
| Idh2      | 65  | 1.37554139  | 1.399462708 | 0.023921318  | 0.22637697 | 0.410105643 |
| Mrps17    | 9   | 2.574899471 | 1.370158472 | -1.204740998 | 0.22656432 | 0.410394383 |
| Hagh      | 49  | 1.474471523 | 1.338765156 | -0.135706367 | 0.22669206 | 0.410575075 |
| Foxd2os   | 46  | 1.543314171 | 1.559561898 | 0.016247727  | 0.22731077 | 0.411543269 |
| Aes       | 62  | 1.799553179 | 1.608370663 | -0.191182516 | 0.2272842  | 0.411543269 |
| Nr1d2     | 60  | 1.381473992 | 1.330414141 | -0.051059852 | 0.22726681 | 0.411543269 |
| Ctso      | 16  | 2.046737385 | 1.43040804  | -0.616329345 | 0.22755475 | 0.41193417  |
| Ydjc      | 5   | 1.703383163 | 1.116606219 | -0.586776944 | 0.22759076 | 0.411948543 |
| Ccna2     | 66  | 1.167859645 | 1.159337584 | -0.008522061 | 0.2276405  | 0.411987749 |
| Oxnad1    | 9   | 1.813104984 | 0.921120913 | -0.891984071 | 0.22768101 | 0.412010257 |
| Zfp511    | 21  | 0.841347128 | 1.12171676  | 0.280369632  | 0.22785163 | 0.412221834 |
| Cse1l     | 48  | 0.825273293 | 0.928094964 | 0.102821671  | 0.22785412 | 0.412221834 |
| Krr1      | 27  | 1.023167955 | 1.362128612 | 0.338960657  | 0.22808766 | 0.412593484 |
| Rab27a    | 6   | 3.439554148 | 2.017033477 | -1.422520671 | 0.22819537 | 0.412737437 |
| Traf5     | 48  | 1.512018716 | 1.076136108 | -0.435882608 | 0.22836561 | 0.412742914 |
| Cks2      | 35  | 1.148764418 | 1.188975689 | 0.040211271  | 0.22843699 | 0.412742914 |
| Pcyt2     | 70  | 19.34737984 | 18.81777356 | -0.529606281 | 0.228276   | 0.412742914 |
| Tmem261   | 27  | 1.662182288 | 1.465097434 | -0.197084854 | 0.22845154 | 0.412742914 |
| Atl2      | 66  | 1.381796441 | 1.320597033 | -0.061199408 | 0.22838401 | 0.412742914 |
| Fh1       | 51  | 1.101181525 | 0.926339593 | -0.174841932 | 0.22836863 | 0.412742914 |

|            |     |             |             |              |            |             |
|------------|-----|-------------|-------------|--------------|------------|-------------|
| Ppcs       | 32  | 0.83646765  | 1.06110934  | 0.224641689  | 0.22836747 | 0.412742914 |
| Ascl1      | 26  | 19.63520784 | 19.71161405 | 0.07640621   | 0.22843123 | 0.412742914 |
| Slc35e1    | 130 | 1.104623524 | 0.92681597  | -0.177807554 | 0.22830568 | 0.412742914 |
| Ube2n      | 129 | 1.258441847 | 1.239173457 | -0.01926839  | 0.22872313 | 0.413182722 |
| Pianp      | 28  | 11.61465373 | 12.1944242  | 0.579770468  | 0.22881433 | 0.413296581 |
| Ctdspl     | 125 | 1.499812699 | 1.246699353 | -0.253113346 | 0.22901558 | 0.41359789  |
| Gulp1      | 23  | 42.92104629 | 41.85334683 | -1.067699463 | 0.22903751 | 0.41359789  |
| Chordc1    | 38  | 1.709805544 | 1.221948733 | -0.487856812 | 0.22910826 | 0.413674747 |
| Psma4      | 7   | 2.854892914 | 1.708427231 | -1.146465683 | 0.22949572 | 0.414217446 |
| 700030J22R | 22  | 1.428732289 | 1.251181388 | -0.177550901 | 0.22952174 | 0.414217446 |
| 110001A14F | 22  | 1.765448706 | 1.367875908 | -0.397572798 | 0.22949924 | 0.414217446 |
| Usmg5      | 33  | 0.944854748 | 0.831966596 | -0.112888152 | 0.22944897 | 0.414217446 |
| Pafah1b1   | 115 | 1.332856965 | 1.369143366 | 0.036286401  | 0.22966082 | 0.414368153 |
| Pip4k2b    | 65  | 1.559553856 | 1.284302494 | -0.275251362 | 0.22966173 | 0.414368153 |
| Fam220a    | 40  | 1.533288071 | 1.637885262 | 0.104597191  | 0.22990878 | 0.414711924 |
| Fam171a1   | 70  | 1.486727792 | 1.403677172 | -0.08305062  | 0.22988776 | 0.414711924 |
| Tsfm       | 44  | 1.751083296 | 1.455246261 | -0.295837035 | 0.23004015 | 0.414846893 |
| Cux2       | 20  | 16.72198035 | 16.16798747 | -0.553992876 | 0.23003918 | 0.414846893 |
| 130110C19F | 11  | 1.972526998 | 1.321902915 | -0.650624083 | 0.23010394 | 0.414910931 |
| Ctr9       | 32  | 1.106645508 | 0.974772049 | -0.131873459 | 0.23039252 | 0.415380248 |
| 130083A17F | 58  | 1.518357786 | 1.391933161 | -0.126424625 | 0.2304573  | 0.415446003 |
| C2cd3      | 33  | 1.427345559 | 1.659333285 | 0.231987727  | 0.23051264 | 0.415494722 |
| Ppp1r16a   | 36  | 1.459761709 | 1.199206367 | -0.260555342 | 0.2305674  | 0.415542376 |
| Snrpd1     | 23  | 1.255600801 | 1.263561703 | 0.007960902  | 0.23062071 | 0.415571937 |
| 131429I11R | 35  | 24.46281089 | 26.08784425 | 1.625033364  | 0.23064044 | 0.415571937 |
| Suclg2     | 60  | 1.307474507 | 1.190798396 | -0.116676112 | 0.23082616 | 0.41585551  |
| Ubfd1      | 32  | 1.928364527 | 1.552496183 | -0.375868344 | 0.23090332 | 0.415943453 |
| Ncoa2      | 147 | 1.520545947 | 1.308869216 | -0.211676731 | 0.23093232 | 0.415944621 |
| Zhx2       | 45  | 1.423980899 | 1.697131341 | 0.273150442  | 0.23106813 | 0.416087092 |
| BC048403   | 42  | 1.130672075 | 1.102329972 | -0.028342102 | 0.23106741 | 0.416087092 |
| Mis12      | 22  | 1.323897732 | 0.854625159 | -0.469272573 | 0.23130521 | 0.416411802 |
| Pcdhga9    | 8   | 56.06574472 | 54.26873617 | -1.797008556 | 0.23129145 | 0.416411802 |
| Mir7033    | 1   | 100         | 98.14814815 | -1.851851852 | 0.23135558 | 0.416451389 |
| Vsig10     | 69  | 1.325640783 | 1.278636697 | -0.047004086 | 0.23143891 | 0.416545053 |



|           |     |             |             |              |            |             |
|-----------|-----|-------------|-------------|--------------|------------|-------------|
| 30013P04F | 3   | 4.761904762 | 2.976190476 | -1.785714286 | 0.23146438 | 0.416545053 |
| Cpne3     | 49  | 1.1665323   | 1.170216103 | 0.003683803  | 0.23149818 | 0.416554786 |
| Nabp1     | 25  | 1.438732054 | 1.548095218 | 0.109363164  | 0.23159955 | 0.416686102 |
| Xpo6      | 69  | 1.305869365 | 1.358351073 | 0.052481708  | 0.23166426 | 0.416751417 |
| Mir99b    | 9   | 86.10556141 | 87.65206997 | 1.546508561  | 0.23179123 | 0.416928713 |
| Zfp748    | 4   | 1.766556939 | 3.811651804 | 2.045094865  | 0.2319803  | 0.417217664 |
| Usp19     | 45  | 1.296714708 | 1.290995511 | -0.005719197 | 0.23211044 | 0.417349426 |
| Rnft2     | 21  | 0.77324112  | 0.80025373  | 0.027012611  | 0.23208335 | 0.417349426 |
| 30411M01f | 4   | 12.78865891 | 11.74749483 | -1.041164084 | 0.23214144 | 0.417354021 |
| Sash3     | 2   | 57.30645161 | 63.44888461 | 6.142432996  | 0.23228697 | 0.417564498 |
| Prr5l     | 19  | 3.632175387 | 2.57371397  | -1.058461417 | 0.23243929 | 0.417787134 |
| Dusp18    | 2   | 2.205882353 | 1.239669421 | -0.966212931 | 0.23249675 | 0.41781764  |
| Ccdc107   | 22  | 1.18774729  | 1.24536163  | 0.05761434   | 0.23251321 | 0.41781764  |
| Sumf1     | 12  | 0.91508713  | 0.280862965 | -0.634224165 | 0.23268858 | 0.418081573 |
| Myod1     | 17  | 42.60061407 | 40.67919301 | -1.921421065 | 0.23284561 | 0.418312505 |
| 30021J03R | 77  | 1.328126945 | 1.116489975 | -0.21163697  | 0.23300566 | 0.418548789 |
| C8g       | 1   | 7.468879668 | 4.87804878  | -2.590830888 | 0.23314171 | 0.418741909 |
| Dhcr24    | 25  | 5.090730857 | 4.482008615 | -0.608722242 | 0.23322456 | 0.418839457 |
| Rad52     | 43  | 1.910183837 | 1.578180556 | -0.332003282 | 0.23335288 | 0.419018624 |
| Nme1      | 13  | 1.588673028 | 1.387646111 | -0.201026918 | 0.2334932  | 0.41921928  |
| Lmcd1     | 9   | 2.606299967 | 1.802636716 | -0.803663251 | 0.2335392  | 0.41925058  |
| Ensa      | 11  | 2.025645997 | 1.375732269 | -0.649913727 | 0.23387952 | 0.419758815 |
| Pxylp1    | 64  | 1.744945323 | 2.155210795 | 0.410265472  | 0.23385924 | 0.419758815 |
| Slc8b1    | 4   | 1.803665396 | 0.739686411 | -1.063978985 | 0.23392275 | 0.419785066 |
| Atg4d     | 36  | 1.751436903 | 1.466224314 | -0.285212589 | 0.23395661 | 0.419794491 |
| Ndufs6    | 21  | 1.249322472 | 1.452394491 | 0.20307202   | 0.23407066 | 0.419896441 |
| Lrfn3     | 27  | 5.318598352 | 6.345792201 | 1.027193849  | 0.23404854 | 0.419896441 |
| Aamp      | 19  | 1.910299545 | 1.497338556 | -0.412960989 | 0.23436303 | 0.420369518 |
| Ube3b     | 19  | 1.666716772 | 1.709298869 | 0.042582096  | 0.23489369 | 0.421218387 |
| Smad4     | 144 | 1.030584679 | 1.117728998 | 0.087144319  | 0.23489199 | 0.421218387 |
| Malt1     | 89  | 1.719648444 | 1.419825476 | -0.299822969 | 0.23509655 | 0.421530641 |
| Hirip3    | 9   | 0.451009895 | 1.198581678 | 0.747571783  | 0.2352435  | 0.42174259  |
| Tk1       | 6   | 1.577129497 | 2.242370847 | 0.66524135   | 0.23549105 | 0.42193089  |
| Cpsf2     | 61  | 1.342385845 | 1.553789186 | 0.21140334   | 0.23539215 | 0.42193089  |

|            |     |             |             |              |            |             |
|------------|-----|-------------|-------------|--------------|------------|-------------|
| Zzz3       | 169 | 1.116320861 | 0.942810144 | -0.173510717 | 0.23546938 | 0.42193089  |
| Kat6a      | 103 | 0.888779072 | 0.819394772 | -0.0693843   | 0.2354137  | 0.42193089  |
| Ppfbp1     | 99  | 1.444390253 | 1.203766221 | -0.240624032 | 0.2354923  | 0.42193089  |
| Rpl23      | 22  | 1.40989355  | 1.125037707 | -0.284855843 | 0.23557045 | 0.421967872 |
| Suz12      | 98  | 1.233950826 | 1.095394842 | -0.138555984 | 0.23555194 | 0.421967872 |
| Gm15941    | 2   | 29.21337676 | 25.18022972 | -4.033147045 | 0.2356443  | 0.421997134 |
| Cep85l     | 43  | 1.838999089 | 1.417360331 | -0.421638758 | 0.23564036 | 0.421997134 |
| Gm12359    | 48  | 1.174333241 | 1.001629954 | -0.172703287 | 0.23575058 | 0.422135945 |
| Zhx1       | 43  | 1.645786035 | 1.571630199 | -0.074155836 | 0.2358207  | 0.422209983 |
| Pskh1      | 11  | 1.639383351 | 1.179072332 | -0.46031102  | 0.23586356 | 0.422235191 |
| Mtfr1      | 43  | 1.361373495 | 1.565786288 | 0.204412793  | 0.23609174 | 0.422415658 |
| Snw1       | 6   | 0.773206122 | 0.142450142 | -0.63075598  | 0.23607643 | 0.422415658 |
| Gpaa1      | 27  | 8.388538976 | 7.888306936 | -0.50023204  | 0.23605607 | 0.422415658 |
| I30402H24F | 64  | 0.894673705 | 1.044558107 | 0.149884403  | 0.2360521  | 0.422415658 |
| Hnf1a      | 1   | 28.75       | 20.73170732 | -8.018292683 | 0.2361083  | 0.422415658 |
| I30011E15F | 61  | 1.041141422 | 1.193736883 | 0.152595461  | 0.23617264 | 0.422479253 |
| Tmem39b    | 41  | 1.54703783  | 1.685100794 | 0.138062964  | 0.23628003 | 0.422568336 |
| Ppp1r13l   | 14  | 1.732881215 | 1.615305886 | -0.117575329 | 0.2362792  | 0.422568336 |
| Kbtbd11    | 72  | 5.00767783  | 5.140384425 | 0.132706595  | 0.23648064 | 0.422875574 |
| Bet1l      | 25  | 1.336271969 | 1.185429048 | -0.150842921 | 0.2367483  | 0.423052115 |
| Smc4       | 28  | 1.636198013 | 1.066871199 | -0.569326814 | 0.23663705 | 0.423052115 |
| Klhl24     | 52  | 1.243691183 | 1.027925443 | -0.21576574  | 0.23675235 | 0.423052115 |
| Zfand3     | 112 | 1.351729228 | 1.069870175 | -0.281859053 | 0.23664672 | 0.423052115 |
| Scrn3      | 5   | 1.033313852 | 1.237404442 | 0.204090591  | 0.23668096 | 0.423052115 |
| Gosr1      | 9   | 3.718073815 | 2.623033057 | -1.095040757 | 0.23671884 | 0.423052115 |
| Tpm1       | 79  | 2.477941047 | 2.454044626 | -0.023896421 | 0.23706031 | 0.423550828 |
| Rpl28      | 30  | 1.267028095 | 1.232818978 | -0.034209117 | 0.23716552 | 0.423687217 |
| Ccdc59     | 54  | 1.244080448 | 1.280940243 | 0.036859795  | 0.23720904 | 0.423713376 |
| Rtf1       | 75  | 1.478248149 | 1.731004375 | 0.252756226  | 0.23726989 | 0.423770499 |
| Ackr3      | 3   | 12.15085708 | 9.209419208 | -2.941437876 | 0.23748315 | 0.424099764 |
| Kmt2a      | 103 | 1.300180067 | 1.441083317 | 0.140903249  | 0.23763027 | 0.424310848 |
| Xrn1       | 33  | 1.593233655 | 0.932212579 | -0.661021076 | 0.23772555 | 0.424429342 |
| Suv420h1   | 43  | 1.321345103 | 1.127510317 | -0.193834786 | 0.23780226 | 0.424514645 |
| Cdipt      | 7   | 3.632543511 | 3.571538218 | -0.061005292 | 0.23783584 | 0.424522945 |

|            |     |             |             |              |            |             |
|------------|-----|-------------|-------------|--------------|------------|-------------|
| Slc7a5     | 40  | 1.105264953 | 0.67658749  | -0.428677463 | 0.23800763 | 0.42477791  |
| Nras       | 32  | 1.387771422 | 1.037629629 | -0.350141793 | 0.23808619 | 0.424866449 |
| Eva1c      | 72  | 1.654074978 | 1.473698272 | -0.180376706 | 0.23813002 | 0.424892981 |
| Ints8      | 49  | 1.254041887 | 1.030126819 | -0.223915068 | 0.23827482 | 0.425075663 |
| Abhd12     | 51  | 1.248012222 | 1.209615142 | -0.03839708  | 0.23829034 | 0.425075663 |
| Zfp964     | 7   | 1.924807863 | 1.149108292 | -0.775699571 | 0.23859979 | 0.425575955 |
| Cdk13      | 102 | 1.155253302 | 0.853710918 | -0.301542385 | 0.23879536 | 0.425736006 |
| Hapln2     | 1   | 89.3129771  | 93.57798165 | 4.265004552  | 0.2388636  | 0.425736006 |
| Eif4ebp3   | 14  | 79.7873016  | 79.03956166 | -0.747739942 | 0.23880513 | 0.425736006 |
| h30093F15F | 2   | 46.14290495 | 40.64825695 | -5.494648001 | 0.23881058 | 0.425736006 |
| Bcat2      | 15  | 2.417383105 | 1.86231295  | -0.555070154 | 0.23880948 | 0.425736006 |
| Cecr5      | 44  | 1.29248874  | 1.461963402 | 0.169474662  | 0.23884454 | 0.425736006 |
| Ubl3       | 76  | 1.374041028 | 1.1211504   | -0.252890628 | 0.23910927 | 0.426122101 |
| Ptges2     | 33  | 1.702712023 | 1.562672908 | -0.140039115 | 0.23923578 | 0.426295782 |
| Srgap1     | 82  | 2.015969236 | 2.021459506 | 0.005490269  | 0.2395787  | 0.426803178 |
| Ubr1       | 31  | 1.260724492 | 1.645280716 | 0.384556224  | 0.23955639 | 0.426803178 |
| H2-M10.3   | 1   | 69.3877551  | 75.51020408 | 6.12244898   | 0.23968209 | 0.426935547 |
| Ncstn      | 19  | 1.585914194 | 1.204181359 | -0.381732835 | 0.23981797 | 0.427125733 |
| Ddt        | 24  | 1.733462013 | 1.841099621 | 0.107637608  | 0.23999366 | 0.427386762 |
| Tusc1      | 126 | 1.730575782 | 1.829708174 | 0.099132392  | 0.24018085 | 0.427668221 |
| Dtl        | 13  | 1.677431597 | 1.28964423  | -0.387787367 | 0.24026137 | 0.42775968  |
| Them4      | 21  | 0.882244136 | 1.078444161 | 0.196200026  | 0.24031076 | 0.427795715 |
| Ism1       | 54  | 1.44505181  | 1.139270176 | -0.305781635 | 0.24044535 | 0.427935702 |
| Maz        | 111 | 1.320844184 | 1.287412883 | -0.0334313   | 0.24044772 | 0.427935702 |
| Fam135a    | 87  | 1.425327747 | 1.2442334   | -0.181094346 | 0.24056725 | 0.428096519 |
| Camkk2     | 92  | 2.03679304  | 2.144781373 | 0.107988333  | 0.24068263 | 0.428249892 |
| Clock      | 245 | 1.35545373  | 1.457841199 | 0.102387469  | 0.24072946 | 0.428281297 |
| Lemd3      | 114 | 1.146042798 | 1.183124068 | 0.03708127   | 0.24085014 | 0.428444056 |
| Lrrc14b    | 7   | 43.57643942 | 41.46345145 | -2.112987963 | 0.24109682 | 0.428830871 |
| Tardbp     | 37  | 1.239909909 | 1.005070216 | -0.234839693 | 0.24130299 | 0.428989594 |
| h10007P14F | 2   | 2.734375    | 3.416646146 | 0.682271146  | 0.24123717 | 0.428989594 |
| Tes        | 34  | 1.302574334 | 1.077133583 | -0.225440751 | 0.24128456 | 0.428989594 |
| Ormdl3     | 40  | 1.48767662  | 1.274400425 | -0.213276195 | 0.24126533 | 0.428989594 |
| Tnc        | 1   | 22.72727273 | 16.27906977 | -6.44820296  | 0.24141777 | 0.429141653 |

|           |     |             |             |              |            |             |
|-----------|-----|-------------|-------------|--------------|------------|-------------|
| Zfp619    | 26  | 1.113951307 | 1.551187381 | 0.437236074  | 0.2414759  | 0.429192994 |
| Skil      | 202 | 1.401371233 | 1.221055125 | -0.180316108 | 0.24167251 | 0.429490425 |
| Fam96b    | 41  | 1.560037028 | 1.405251648 | -0.15478538  | 0.24221946 | 0.430341838 |
| Agtrap    | 43  | 1.963062804 | 1.602128931 | -0.360933873 | 0.24219338 | 0.430341838 |
| Pcnp      | 46  | 0.860316315 | 0.902541537 | 0.042225221  | 0.24223958 | 0.430341838 |
| Dazap2    | 44  | 1.332267897 | 1.444588245 | 0.112320347  | 0.24237411 | 0.430388103 |
| 30188P03F | 4   | 45.59067677 | 41.55234104 | -4.038335728 | 0.24238294 | 0.430388103 |
| 10047M10F | 89  | 1.360440466 | 1.293454595 | -0.066985871 | 0.242359   | 0.430388103 |
| N4bp3     | 22  | 3.369272766 | 2.705368922 | -0.663903844 | 0.24235837 | 0.430388103 |
| Jun       | 44  | 1.470986246 | 1.158703382 | -0.312282864 | 0.24245344 | 0.430461194 |
| Paox      | 22  | 1.48070405  | 1.650091781 | 0.169387732  | 0.24254973 | 0.430580051 |
| Bop1      | 55  | 1.594303359 | 1.37507087  | -0.219232488 | 0.24265976 | 0.430723276 |
| Alg12     | 67  | 1.371325208 | 1.554712202 | 0.183386994  | 0.24270112 | 0.430744594 |
| Actn4     | 57  | 1.220715138 | 1.014672008 | -0.20604313  | 0.24311704 | 0.431302474 |
| Atp9b     | 40  | 1.03943279  | 0.678072105 | -0.361360685 | 0.24314439 | 0.431302474 |
| Dgkq      | 19  | 2.0001952   | 1.309061572 | -0.691133628 | 0.24315695 | 0.431302474 |
| Arhgef16  | 69  | 2.225202094 | 1.909621883 | -0.315580211 | 0.24305377 | 0.431302474 |
| Ubxn2a    | 112 | 1.248231003 | 1.093706203 | -0.1545248   | 0.24316242 | 0.431302474 |
| Nr5a2     | 3   | 12.3812193  | 17.40767905 | 5.026459746  | 0.24331055 | 0.431495842 |
| Snx15     | 26  | 1.214935176 | 1.028115997 | -0.186819179 | 0.24333025 | 0.431495842 |
| Wwp2      | 43  | 1.33019998  | 1.001109069 | -0.32909091  | 0.2434094  | 0.431584041 |
| Ppap2a    | 49  | 1.253161206 | 1.090665021 | -0.162496184 | 0.24343996 | 0.431586072 |
| 30008H23F | 23  | 0.548530361 | 0.672976877 | 0.124446516  | 0.24354393 | 0.43171825  |
| Dcaf10    | 98  | 1.176767249 | 1.246022027 | 0.069254778  | 0.24376309 | 0.432054543 |
| Irf2bp1   | 31  | 1.243373748 | 1.651713805 | 0.408340056  | 0.24392655 | 0.432245563 |
| Tpst2     | 7   | 1.306260163 | 1.750475822 | 0.444215659  | 0.24395923 | 0.432245563 |
| Kctd13    | 60  | 1.287083286 | 0.957198748 | -0.329884539 | 0.24393011 | 0.432245563 |
| Hip1r     | 73  | 1.303280849 | 1.234285105 | -0.068995743 | 0.24423747 | 0.432686293 |
| Atmin     | 54  | 1.266388429 | 0.970579786 | -0.295808643 | 0.24431043 | 0.432763302 |
| Gpkow     | 14  | 14.39970008 | 13.62517125 | -0.774528835 | 0.24434718 | 0.432776159 |
| 00060B14F | 10  | 0.193705736 | 0.75602702  | 0.562321284  | 0.24449708 | 0.432884903 |
| Zfat      | 46  | 1.091344886 | 1.224009811 | 0.132664925  | 0.2444869  | 0.432884903 |
| Brd3      | 156 | 1.235195027 | 1.101607466 | -0.133587562 | 0.24446258 | 0.432884903 |
| 30069E16F | 3   | 3.065279578 | 2.85455599  | -0.210723588 | 0.24455592 | 0.432936858 |

|           |     |             |             |              |            |             |
|-----------|-----|-------------|-------------|--------------|------------|-------------|
| Prkci     | 54  | 0.978878504 | 0.853847977 | -0.125030527 | 0.24463324 | 0.433021483 |
| Ipo8      | 10  | 3.645980258 | 2.773429657 | -0.872550602 | 0.24476253 | 0.433198091 |
| Ccl17     | 2   | 94.61028192 | 91.98915446 | -2.621127461 | 0.24490415 | 0.433396469 |
| Pcx       | 47  | 1.340248686 | 1.244700088 | -0.095548597 | 0.24507269 | 0.433642424 |
| Efcab10   | 3   | 35.73333333 | 31.65374677 | -4.079586563 | 0.24522306 | 0.433834422 |
| Gna11     | 75  | 0.981654928 | 0.952082625 | -0.029572302 | 0.24526989 | 0.433834422 |
| Nck1      | 101 | 1.408691951 | 1.282667673 | -0.126024278 | 0.24526677 | 0.433834422 |
| Snx18     | 57  | 0.992825127 | 0.84331496  | -0.149510167 | 0.24541413 | 0.433984921 |
| Ucp3      | 6   | 97.52408815 | 96.19310861 | -1.330979538 | 0.24540841 | 0.433984921 |
| Aifm2     | 11  | 17.66875417 | 17.2082538  | -0.460500369 | 0.24545446 | 0.434003952 |
| Gm6787    | 9   | 23.24051569 | 21.58498232 | -1.655533364 | 0.24556231 | 0.434128987 |
| Ahnak     | 52  | 2.696026937 | 2.235121853 | -0.460905084 | 0.24558435 | 0.434128987 |
| Mrpl33    | 23  | 0.909546378 | 1.055767115 | 0.146220737  | 0.24572012 | 0.434264371 |
| Gpr137b   | 11  | 1.291806829 | 1.404169109 | 0.112362281  | 0.24571832 | 0.434264371 |
| Rps15a    | 7   | 1.49946181  | 1.072537238 | -0.426924572 | 0.24586788 | 0.434473173 |
| Extl1     | 10  | 6.688283774 | 6.314224811 | -0.374058963 | 0.24607074 | 0.434779297 |
| Rplp2-ps1 | 9   | 92.66299946 | 90.4905811  | -2.172418356 | 0.24620606 | 0.434913646 |
| Bub3      | 40  | 1.565862816 | 1.532358148 | -0.033504668 | 0.24618727 | 0.434913646 |
| Rpl13     | 77  | 1.254196831 | 1.360410373 | 0.106213542  | 0.24631446 | 0.435052763 |
| Enpp4     | 50  | 1.110345301 | 0.817598043 | -0.292747258 | 0.24640786 | 0.435165349 |
| Man2a2    | 87  | 1.241438426 | 1.076164174 | -0.165274252 | 0.24651787 | 0.435307242 |
| Pts       | 31  | 0.938073054 | 1.251472507 | 0.313399453  | 0.24659933 | 0.435398695 |
| Ephb6     | 58  | 1.525753833 | 1.398705092 | -0.127048741 | 0.24665662 | 0.43544745  |
| Yes1      | 99  | 1.19269129  | 1.193146235 | 0.000454946  | 0.24669813 | 0.435468343 |
| Irgq      | 5   | 2.61253581  | 2.470711719 | -0.141824091 | 0.2467551  | 0.435516513 |
| Dxo       | 48  | 1.040027021 | 1.25264295  | 0.212615929  | 0.2467963  | 0.435536857 |
| Leprotl1  | 93  | 1.363064632 | 1.341890559 | -0.021174074 | 0.24700053 | 0.435844851 |
| Ago1      | 24  | 1.685195722 | 1.80332321  | 0.118127488  | 0.24737636 | 0.436455532 |
| Tmem184c  | 10  | 0.652020202 | 1.558728221 | 0.906708019  | 0.24743297 | 0.436502935 |
| Zfp235    | 8   | 0.88028169  | 1.553799296 | 0.673517606  | 0.24754845 | 0.436654152 |
| Tfcp2l1   | 36  | 2.19120958  | 2.067373117 | -0.123836463 | 0.24758122 | 0.436659474 |
| Fam3c     | 72  | 0.943795859 | 0.776281665 | -0.167514195 | 0.24766115 | 0.436747949 |
| Pnpla2    | 1   | 36.95652174 | 47.82608696 | 10.86956522  | 0.24786236 | 0.437050257 |
| Rabl2     | 21  | 1.728864738 | 1.294901425 | -0.433963313 | 0.24810379 | 0.437423414 |

|            |     |             |             |              |            |             |
|------------|-----|-------------|-------------|--------------|------------|-------------|
| Lta4h      | 24  | 0.883929618 | 0.898898983 | 0.014969365  | 0.24829231 | 0.437703186 |
| Ring1      | 64  | 1.498522732 | 1.253377722 | -0.245145009 | 0.24836107 | 0.437745736 |
| Ncoa3      | 89  | 0.774810725 | 1.122811567 | 0.348000842  | 0.24837611 | 0.437745736 |
| Clcn6      | 32  | 1.979466333 | 1.867820647 | -0.111645686 | 0.24854953 | 0.437998781 |
| Mis18a     | 10  | 1.102718528 | 0.714514013 | -0.388204514 | 0.24858112 | 0.438001851 |
| Stag1      | 120 | 1.203360788 | 1.142427872 | -0.060932916 | 0.24868698 | 0.438135768 |
| Dync1i2    | 33  | 1.349137105 | 1.200282308 | -0.148854797 | 0.2487998  | 0.438281906 |
| Rab33b     | 65  | 0.946949679 | 1.098515997 | 0.151566318  | 0.2488855  | 0.438380254 |
| Gbe1       | 74  | 1.17579508  | 1.159189114 | -0.016605966 | 0.24917579 | 0.438786217 |
| Map2k7     | 23  | 3.444578646 | 2.718066131 | -0.726512516 | 0.24914958 | 0.438786217 |
| Gm4980     | 35  | 11.24789868 | 11.03309366 | -0.214805015 | 0.24939117 | 0.439080551 |
| Ndufb2     | 29  | 1.273898622 | 1.346552643 | 0.072654021  | 0.24940278 | 0.439080551 |
| Sbf2       | 126 | 1.453957896 | 1.193186501 | -0.260771395 | 0.24947895 | 0.439161961 |
| Stk35      | 36  | 2.26376237  | 2.007928906 | -0.255833464 | 0.24964735 | 0.439384399 |
| Nucb2      | 33  | 1.182711237 | 1.06921525  | -0.113495987 | 0.2496652  | 0.439384399 |
| Tecpr2     | 36  | 1.195879453 | 1.426452226 | 0.230572773  | 0.24969758 | 0.439388686 |
| Vps16      | 8   | 0.80625855  | 0.525771726 | -0.280486824 | 0.24989259 | 0.439679116 |
| Ubac2      | 53  | 1.772432841 | 1.499027445 | -0.273405396 | 0.24992604 | 0.439685251 |
| I30048N14F | 65  | 0.903868128 | 1.168518728 | 0.2646506    | 0.25011288 | 0.439942382 |
| Alkbh1     | 24  | 0.946403233 | 1.059364494 | 0.112961261  | 0.25013216 | 0.439942382 |
| Zfp622     | 62  | 1.396978588 | 1.059738298 | -0.33724029  | 0.25020103 | 0.440010773 |
| Il17rc     | 7   | 58.74795276 | 55.18976655 | -3.558186215 | 0.25051536 | 0.440457992 |
| Ugdh       | 46  | 1.316002379 | 1.04843919  | -0.267563189 | 0.25050653 | 0.440457992 |
| Tbc1d22b   | 48  | 2.051134046 | 2.214230426 | 0.16309638   | 0.25066373 | 0.440666064 |
| Eif1a      | 16  | 1.991239351 | 2.21610051  | 0.22486116   | 0.25088581 | 0.441003644 |
| Mir688     | 6   | 4.425521628 | 2.980318589 | -1.44520304  | 0.25098727 | 0.441107403 |
| I10016A17F | 13  | 38.63188297 | 41.42804773 | 2.796164765  | 0.25100496 | 0.441107403 |
| Tom1l2     | 38  | 1.607065556 | 1.335589428 | -0.271476128 | 0.25120915 | 0.441413363 |
| Mir7037    | 4   | 96.72918565 | 97.54492474 | 0.815739091  | 0.25142898 | 0.441468579 |
| I10454H06F | 13  | 1.205458405 | 1.228818589 | 0.023360183  | 0.25145116 | 0.441468579 |
| Zdhhc18    | 42  | 1.443163128 | 0.996222875 | -0.446940254 | 0.25138871 | 0.441468579 |
| Abcf2      | 69  | 1.3698704   | 1.448899853 | 0.079029453  | 0.25133341 | 0.441468579 |
| Tmem17     | 44  | 1.221966629 | 1.177843043 | -0.044123587 | 0.25144122 | 0.441468579 |
| Trpm2      | 11  | 12.55764163 | 14.33358014 | 1.775938505  | 0.25127651 | 0.441468579 |

|            |     |             |             |              |            |             |
|------------|-----|-------------|-------------|--------------|------------|-------------|
| Cav1       | 5   | 3.071034683 | 4.594905493 | 1.52387081   | 0.25135736 | 0.441468579 |
| Whamm      | 66  | 0.945812099 | 1.042633827 | 0.096821729  | 0.25149135 | 0.441486303 |
| 10014B01F  | 2   | 3.574424564 | 3.037164508 | -0.537260056 | 0.25155323 | 0.441489312 |
| Znrf3      | 105 | 1.093393225 | 1.227557104 | 0.134163879  | 0.25152436 | 0.441489312 |
| Relb       | 66  | 1.473052199 | 1.47078473  | -0.002267469 | 0.25171644 | 0.441722917 |
| Atrip      | 28  | 1.322147413 | 1.299715181 | -0.022432232 | 0.25198233 | 0.44213663  |
| 700008J07R | 36  | 1.427103208 | 1.248563152 | -0.178540056 | 0.2521148  | 0.442149301 |
| Cntnap5a   | 6   | 58.63108796 | 56.42615775 | -2.204930214 | 0.25220047 | 0.442149301 |
| Dpp7       | 6   | 3.655566376 | 2.440719062 | -1.214847313 | 0.25210907 | 0.442149301 |
| Tmem60     | 34  | 1.033109885 | 0.872976511 | -0.160133374 | 0.25219779 | 0.442149301 |
| Dyrk1a     | 228 | 0.934277627 | 0.992983672 | 0.058706045  | 0.25204863 | 0.442149301 |
| Psmb4      | 39  | 1.403449184 | 1.520467054 | 0.117017869  | 0.2521495  | 0.442149301 |
| Crispld1   | 3   | 6.355218855 | 4.167997445 | -2.18722141  | 0.25212575 | 0.442149301 |
| Thop1      | 27  | 0.821265424 | 0.747666934 | -0.07359849  | 0.25234559 | 0.442246164 |
| Fem1c      | 57  | 1.790813831 | 1.412311986 | -0.378501845 | 0.25230365 | 0.442246164 |
| Fam43a     | 58  | 1.069079286 | 1.171339437 | 0.102260151  | 0.25234613 | 0.442246164 |
| Rpl34-ps1  | 41  | 0.997409599 | 1.035807882 | 0.038398283  | 0.25252133 | 0.442447527 |
| Psma2      | 12  | 0.999411322 | 1.522034187 | 0.522622866  | 0.25249357 | 0.442447527 |
| Rhbdf1     | 94  | 0.989095629 | 0.996344617 | 0.007248987  | 0.25273296 | 0.442765448 |
| Brf2       | 20  | 0.964816515 | 1.2630008   | 0.298184286  | 0.25280131 | 0.442832338 |
| Camk2g     | 75  | 1.62548712  | 1.502492456 | -0.122994665 | 0.25295488 | 0.442995572 |
| Phactr4    | 33  | 1.435165155 | 1.532512798 | 0.097347643  | 0.25295224 | 0.442995572 |
| Znhit2     | 90  | 1.232432713 | 1.109334909 | -0.123097804 | 0.25320912 | 0.443334996 |
| Paqr8      | 43  | 1.813747749 | 1.482103474 | -0.331644275 | 0.25318355 | 0.443334996 |
| Cpt1b      | 27  | 86.52110366 | 85.37590278 | -1.145200879 | 0.25332145 | 0.443478757 |
| Casp8      | 25  | 1.464391696 | 1.81474626  | 0.350354563  | 0.25343192 | 0.443619234 |
| Cab39l     | 30  | 1.154355538 | 1.270815744 | 0.116460206  | 0.25377223 | 0.444161937 |
| Wtap       | 123 | 1.238780736 | 1.038530893 | -0.200249843 | 0.25391168 | 0.444353012 |
| 130513N10F | 60  | 1.279590075 | 1.202725114 | -0.076864961 | 0.25409203 | 0.444615597 |
| Wdr53      | 27  | 1.379611858 | 0.965759933 | -0.413851925 | 0.25430467 | 0.444934633 |
| Mettl1     | 53  | 2.405225567 | 2.207306859 | -0.197918708 | 0.25471839 | 0.44553642  |
| Cmtm2b     | 1   | 96.71361502 | 94.63087248 | -2.08274254  | 0.25473971 | 0.44553642  |
| Slc35b1    | 12  | 0.806788895 | 1.374749161 | 0.567960265  | 0.25468762 | 0.44553642  |
| Ano4       | 3   | 15.73518994 | 14.01583105 | -1.719358885 | 0.25479252 | 0.445575672 |

|           |     |             |             |              |            |             |
|-----------|-----|-------------|-------------|--------------|------------|-------------|
| Tmed7     | 60  | 1.052313838 | 1.098375557 | 0.046061719  | 0.25491256 | 0.445732478 |
| Irf2bpl   | 74  | 1.166913948 | 1.031366167 | -0.13554778  | 0.25495246 | 0.445749121 |
| Dcbld1    | 48  | 2.072821278 | 1.777099737 | -0.295721541 | 0.25511636 | 0.445982546 |
| Luzp1     | 44  | 1.37012567  | 1.521385765 | 0.151260095  | 0.25519788 | 0.446071908 |
| Rhot1     | 59  | 1.005972854 | 0.761289927 | -0.244682927 | 0.25544447 | 0.446449754 |
| Klhl17    | 26  | 1.033840168 | 0.802857354 | -0.230982815 | 0.25548762 | 0.446472002 |
| Esyt3     | 43  | 15.79723534 | 16.63588427 | 0.838648922  | 0.25565574 | 0.446712591 |
| Asnsd1    | 26  | 0.775623983 | 0.913385068 | 0.137761085  | 0.2558192  | 0.446838583 |
| Nae1      | 34  | 1.120258985 | 0.838466995 | -0.28179199  | 0.25578132 | 0.446838583 |
| Kdm4a     | 9   | 2.435543261 | 1.981409723 | -0.454133538 | 0.25579604 | 0.446838583 |
| Sike1     | 42  | 0.933506791 | 0.885585852 | -0.047920939 | 0.2559922  | 0.447087548 |
| Rfwd3     | 14  | 1.15075844  | 0.483165722 | -0.667592718 | 0.25605137 | 0.447137669 |
| Tmub2     | 18  | 1.211927033 | 0.517828761 | -0.694098272 | 0.25617832 | 0.447306127 |
| Ndufb4    | 21  | 1.200497311 | 1.040203494 | -0.160293817 | 0.25641772 | 0.447601745 |
| Emc6      | 15  | 1.450704651 | 0.98120906  | -0.469495591 | 0.25643914 | 0.447601745 |
| Dnajc2    | 58  | 1.278899664 | 0.971557541 | -0.307342124 | 0.25643402 | 0.447601745 |
| Tmcc3     | 91  | 1.882401519 | 1.977434961 | 0.095033442  | 0.25648858 | 0.447634799 |
| Gm2115    | 35  | 3.97927013  | 4.159821948 | 0.180551818  | 0.2566483  | 0.447807028 |
| Ubap2l    | 22  | 1.124277243 | 1.554117647 | 0.429840405  | 0.25664232 | 0.447807028 |
| Itga2     | 14  | 1.764838051 | 1.378306073 | -0.386531978 | 0.25674583 | 0.447923954 |
| Aars2     | 22  | 1.526594846 | 1.486103785 | -0.040491061 | 0.25693904 | 0.448160976 |
| Ubxn10    | 15  | 21.42229566 | 20.29905567 | -1.123239992 | 0.25694278 | 0.448160976 |
| Rabepk    | 11  | 1.913579924 | 1.474573419 | -0.439006506 | 0.25699071 | 0.448191303 |
| Crtc3     | 113 | 1.056618843 | 1.252235131 | 0.195616288  | 0.25706114 | 0.448260869 |
| Nrep      | 30  | 1.445264214 | 1.188036831 | -0.257227384 | 0.25710717 | 0.448287854 |
| Chek1     | 23  | 1.625981867 | 1.392918992 | -0.233062875 | 0.25718932 | 0.448377812 |
| Insc      | 10  | 44.71589713 | 45.9495412  | 1.233644075  | 0.2573489  | 0.448602721 |
| 10062M04f | 28  | 1.230847924 | 1.314611108 | 0.083763184  | 0.25741231 | 0.44865997  |
| Zbtb22    | 20  | 1.291223471 | 1.216594422 | -0.074629049 | 0.25764045 | 0.448897653 |
| Habp4     | 44  | 1.169620909 | 1.206821566 | 0.037200657  | 0.25762697 | 0.448897653 |
| Plekhh3   | 25  | 2.075543475 | 1.900790663 | -0.174752812 | 0.25759332 | 0.448897653 |
| Sema4g    | 42  | 7.230009396 | 7.088399759 | -0.141609637 | 0.2577566  | 0.44900452  |
| Bbs12     | 20  | 1.112013125 | 0.943451467 | -0.168561658 | 0.25777291 | 0.44900452  |
| Sorbs2os  | 8   | 90.81728127 | 92.88788115 | 2.070599881  | 0.25785429 | 0.44900452  |



|           |     |             |             |              |            |             |
|-----------|-----|-------------|-------------|--------------|------------|-------------|
| Snora26   | 49  | 1.555370167 | 1.870912565 | 0.315542398  | 0.25785478 | 0.44900452  |
| Mau2      | 24  | 1.510112257 | 1.349610377 | -0.16050188  | 0.25780286 | 0.44900452  |
| H2-T3     | 2   | 68.79830399 | 65.38461538 | -3.413688609 | 0.25789079 | 0.449013944 |
| Cul7      | 31  | 6.207185189 | 6.116947064 | -0.090238125 | 0.25826109 | 0.449605318 |
| Zfhx2     | 24  | 2.649344617 | 2.01745177  | -0.631892847 | 0.25848428 | 0.449940496 |
| Psme3     | 46  | 2.031697478 | 2.012606687 | -0.019090791 | 0.25864599 | 0.450168574 |
| Tns1      | 70  | 2.69896656  | 3.147934697 | 0.448968137  | 0.25868654 | 0.450185753 |
| Ulk1      | 81  | 1.073755084 | 1.093462983 | 0.019707899  | 0.25876362 | 0.450266492 |
| Ppm1k     | 7   | 1.84151565  | 1.391015607 | -0.450500043 | 0.25889551 | 0.450442577 |
| Laptm4b   | 37  | 1.556899107 | 1.176970283 | -0.379928824 | 0.25899433 | 0.450561093 |
| Gm14403   | 2   | 17.62867647 | 15.07983714 | -2.548839328 | 0.2590451  | 0.450595993 |
| Clec16a   | 43  | 0.997350821 | 1.143439976 | 0.146089155  | 0.25914233 | 0.450711696 |
| Gpr155    | 28  | 1.826404547 | 1.411273594 | -0.415130953 | 0.25931676 | 0.450961617 |
| Nek3      | 1   | 7.272727273 | 14          | 6.727272727  | 0.25936766 | 0.450996685 |
| Adgr1     | 137 | 1.496516136 | 1.382965977 | -0.113550159 | 0.25942684 | 0.451046139 |
| Adnp2     | 22  | 2.175140441 | 1.750689404 | -0.424451036 | 0.25984698 | 0.451669575 |
| Sephs2    | 38  | 1.274888885 | 1.325197612 | 0.050308727  | 0.2598194  | 0.451669575 |
| Ppapdc2   | 48  | 1.223421038 | 1.253845298 | 0.03042426   | 0.25989339 | 0.451696738 |
| Ier3      | 28  | 1.38966492  | 1.017099972 | -0.372564949 | 0.26030247 | 0.45235415  |
| Polr2k    | 5   | 2.582465899 | 1.098034767 | -1.484431133 | 0.26033781 | 0.452361989 |
| Itga6     | 79  | 1.02484216  | 1.283546633 | 0.258704473  | 0.26059062 | 0.452747663 |
| Ankrd11   | 141 | 0.966040969 | 0.938633126 | -0.027407843 | 0.26068966 | 0.452866121 |
| Npm1      | 14  | 1.628848074 | 1.53130744  | -0.097540634 | 0.26085414 | 0.453098202 |
| Arf5      | 64  | 1.280233755 | 1.301260119 | 0.021026363  | 0.26091272 | 0.453122718 |
| Manf      | 57  | 1.038118746 | 1.235218966 | 0.19710022   | 0.26093001 | 0.453122718 |
| Dlgap4    | 141 | 3.335484727 | 4.106615309 | 0.771130582  | 0.26101719 | 0.453194261 |
| Rnaseh1   | 12  | 1.310265145 | 1.255398638 | -0.054866507 | 0.26103298 | 0.453194261 |
| Commd7    | 31  | 1.179614321 | 0.880209836 | -0.299404485 | 0.26149898 | 0.4539496   |
| Gnas      | 217 | 18.55101155 | 18.23509822 | -0.31591333  | 0.26159982 | 0.454070951 |
| Tnfrsf12a | 30  | 1.681793418 | 1.171305452 | -0.510487967 | 0.26170747 | 0.454204075 |
| Rrp15     | 9   | 1.919616774 | 1.618668259 | -0.300948515 | 0.26197401 | 0.454612885 |
| Prr14     | 27  | 2.91665977  | 2.587883952 | -0.328775818 | 0.26214612 | 0.454857767 |
| 00123M08f | 8   | 2.469030427 | 2.079212255 | -0.389818172 | 0.26240569 | 0.455148383 |
| Cyb5r4    | 32  | 1.218753118 | 1.079842259 | -0.138910858 | 0.26235137 | 0.455148383 |

|            |     |             |             |              |            |             |
|------------|-----|-------------|-------------|--------------|------------|-------------|
| Zfp367     | 101 | 0.944731605 | 1.057121307 | 0.112389703  | 0.26240666 | 0.455148383 |
| Dhx8       | 4   | 1.274839275 | 0.520833333 | -0.754005942 | 0.26244539 | 0.455161767 |
| Thbs3      | 15  | 2.368510162 | 1.365730184 | -1.002779979 | 0.26253263 | 0.455259262 |
| Zfp653     | 45  | 0.935567033 | 1.100052797 | 0.164485764  | 0.26257355 | 0.455276416 |
| Phb2       | 18  | 1.288248254 | 1.794572902 | 0.506324647  | 0.26270255 | 0.455446271 |
| Farsa      | 18  | 1.274756629 | 0.893866972 | -0.380889656 | 0.26299576 | 0.45590074  |
| Dcaf5      | 60  | 0.897216018 | 1.116974715 | 0.219758697  | 0.26308547 | 0.456002379 |
| Tomm5      | 9   | 2.19275618  | 1.331868461 | -0.860887718 | 0.26333733 | 0.456385023 |
| Sf3b3      | 10  | 1.381838887 | 1.120799401 | -0.261039486 | 0.26345795 | 0.456540141 |
| Cenpw      | 22  | 1.08766367  | 1.395483866 | 0.307820196  | 0.26352122 | 0.456595863 |
| Pars2      | 10  | 1.393400538 | 1.588163305 | 0.194762767  | 0.26369589 | 0.456844576 |
| Taok3      | 31  | 12.68435372 | 13.31044961 | 0.626095896  | 0.26373634 | 0.45686071  |
| 130511A02F | 16  | 56.38178762 | 56.73668107 | 0.354893446  | 0.26378544 | 0.456864727 |
| Mtrr       | 34  | 1.011467092 | 1.694700102 | 0.68323301   | 0.26380093 | 0.456864727 |
| Slc25a33   | 87  | 1.190368965 | 1.144143283 | -0.046225682 | 0.26402308 | 0.457195492 |
| Armc7      | 20  | 1.639401367 | 1.132016605 | -0.507384761 | 0.26426512 | 0.457560628 |
| 00003M02f  | 20  | 4.609804436 | 5.73966968  | 1.129865244  | 0.26441766 | 0.457770743 |
| Ccdc23     | 63  | 1.282342044 | 1.58826628  | 0.305924236  | 0.264494   | 0.457848879 |
| Bcl2       | 73  | 1.651596913 | 1.687794498 | 0.036197584  | 0.264624   | 0.458019887 |
| Mtmr4      | 31  | 1.300934995 | 0.988779019 | -0.312155976 | 0.26483349 | 0.458328421 |
| Dennd4a    | 31  | 1.753156857 | 1.148522386 | -0.604634471 | 0.26509213 | 0.458721933 |
| Rpl36      | 34  | 1.552611997 | 1.25822752  | -0.294384477 | 0.26512755 | 0.458729123 |
| Hist2h2ab  | 7   | 3.88966658  | 3.187881083 | -0.701785497 | 0.26519025 | 0.458754804 |
| Nxn12      | 24  | 12.80019246 | 15.07294924 | 2.272756785  | 0.26520492 | 0.458754804 |
| Ahcyl1     | 43  | 0.995217729 | 0.866516314 | -0.128701414 | 0.26544698 | 0.459119406 |
| Rps18      | 45  | 1.099140063 | 1.007194216 | -0.091945847 | 0.26556589 | 0.459204865 |
| Coro1a     | 28  | 15.73413885 | 16.58986216 | 0.855723306  | 0.26562157 | 0.459204865 |
| Exoc1      | 11  | 2.628046164 | 3.310014602 | 0.681968438  | 0.26561834 | 0.459204865 |
| Bag6       | 44  | 1.058946568 | 1.265686622 | 0.206740054  | 0.26554278 | 0.459204865 |
| Os9        | 3   | 1.815439462 | 2.524665415 | 0.709225952  | 0.26565312 | 0.459205309 |
| Arpc5      | 131 | 1.300259084 | 1.138476114 | -0.16178297  | 0.26573002 | 0.459284128 |
| Exoc5      | 7   | 0.998695172 | 0.474433316 | -0.524261856 | 0.26583708 | 0.459343942 |
| Hnrnpr     | 71  | 1.174536621 | 1.246953181 | 0.07241656   | 0.26585853 | 0.459343942 |
| Mrm1       | 20  | 1.234342581 | 1.022771595 | -0.211570987 | 0.26580719 | 0.459343942 |

|            |     |             |             |              |            |             |
|------------|-----|-------------|-------------|--------------|------------|-------------|
| Al837181   | 28  | 1.833226054 | 1.303620368 | -0.529605686 | 0.26598642 | 0.459456708 |
| Cyp39a1    | 12  | 1.637840136 | 1.348350021 | -0.289490115 | 0.26598552 | 0.459456708 |
| Srgap2     | 66  | 1.55113922  | 1.342533238 | -0.208605982 | 0.26607336 | 0.459552784 |
| Zmym2      | 38  | 1.535321868 | 1.286260958 | -0.24906091  | 0.26622328 | 0.459703505 |
| Lace1      | 31  | 1.101047474 | 1.348968343 | 0.247920869  | 0.26621534 | 0.459703505 |
| Uggt1      | 51  | 1.648045163 | 1.358013504 | -0.29003166  | 0.26632714 | 0.459774635 |
| Pqlc1      | 17  | 9.114424525 | 10.10432866 | 0.989904136  | 0.26629695 | 0.459774635 |
| Dok5       | 18  | 52.58056658 | 54.82196073 | 2.241394152  | 0.26658992 | 0.460174152 |
| Rab24      | 32  | 0.992143454 | 1.169653675 | 0.177510221  | 0.26674797 | 0.460261624 |
| Mycbp2     | 19  | 1.980078428 | 1.601950594 | -0.378127834 | 0.26677061 | 0.460261624 |
| i10002D24F | 17  | 1.006926394 | 0.714738404 | -0.29218799  | 0.26669158 | 0.460261624 |
| Dok4       | 49  | 1.48284723  | 1.088691666 | -0.394155564 | 0.26679742 | 0.460261624 |
| Ugcg       | 109 | 1.119391976 | 1.32581645  | 0.206424474  | 0.26670543 | 0.460261624 |
| Aldh3a2    | 19  | 1.740059097 | 1.14127536  | -0.598783738 | 0.26683882 | 0.460278926 |
| Tpp2       | 37  | 1.677580333 | 1.167949783 | -0.50963055  | 0.26708332 | 0.460592397 |
| Zfp120     | 2   | 2.595211313 | 5.470162749 | 2.874951436  | 0.26705737 | 0.460592397 |
| Cul4b      | 2   | 91.48606811 | 93.21309576 | 1.727027644  | 0.26719163 | 0.460725034 |
| Chid1      | 26  | 1.140156636 | 0.705986559 | -0.434170077 | 0.26723305 | 0.460742305 |
| Rbmxl1     | 64  | 0.923612905 | 0.882311762 | -0.041301143 | 0.2672878  | 0.460782561 |
| i30116N13F | 53  | 1.170713477 | 1.116709521 | -0.054003956 | 0.26732317 | 0.460789398 |
| Arsg       | 61  | 6.298620952 | 5.292454106 | -1.006166846 | 0.2674255  | 0.460911648 |
| Esf1       | 2   | 2.5         | 0.740740741 | -1.759259259 | 0.26749839 | 0.460983132 |
| Uevld      | 15  | 2.283120702 | 2.585298978 | 0.302178276  | 0.26754366 | 0.461007012 |
| Pole4      | 44  | 1.189025383 | 1.091683784 | -0.097341599 | 0.26763685 | 0.461113436 |
| Itrip1     | 36  | 1.090059795 | 1.199666476 | 0.109606681  | 0.2679325  | 0.46151444  |
| Prkaca     | 83  | 1.293717661 | 1.147364543 | -0.146353118 | 0.26792079 | 0.46151444  |
| Kif23      | 46  | 1.37991773  | 1.390007552 | 0.010089822  | 0.26803606 | 0.461638633 |
| Mplkip     | 57  | 2.7109498   | 3.630098814 | 0.919149014  | 0.26826665 | 0.461948771 |
| Med31      | 1   | 2.659574468 | 4.812834225 | 2.153259757  | 0.26827909 | 0.461948771 |
| Zwilch     | 18  | 0.964362608 | 1.601819783 | 0.637457175  | 0.26831751 | 0.461960711 |
| Lpar2      | 15  | 4.137492891 | 3.381649847 | -0.755843045 | 0.26844198 | 0.462084388 |
| Epb4.114a  | 53  | 2.072646973 | 1.701101202 | -0.371545771 | 0.26845232 | 0.462084388 |
| Tasp1      | 32  | 0.73041879  | 0.980925585 | 0.250506795  | 0.26855191 | 0.462201595 |
| Tulp1      | 3   | 83.64613926 | 79.38974754 | -4.256391716 | 0.26881281 | 0.462596368 |

|            |     |             |             |              |            |             |
|------------|-----|-------------|-------------|--------------|------------|-------------|
| Tnfrsf25   | 28  | 37.91286394 | 39.09516365 | 1.182299714  | 0.26891634 | 0.462720253 |
| Acyp1      | 11  | 0.761687654 | 0.225861095 | -0.535826558 | 0.2690374  | 0.462874294 |
| Nsun5      | 17  | 1.586101639 | 1.639852547 | 0.053750908  | 0.26930906 | 0.463233055 |
| Ube2h      | 41  | 0.946831893 | 1.100913462 | 0.154081569  | 0.26930247 | 0.463233055 |
| Grpel2     | 24  | 0.921500672 | 0.912803324 | -0.008697348 | 0.269371   | 0.46328528  |
| Etnk1      | 101 | 2.098369725 | 1.459092485 | -0.63927724  | 0.26996395 | 0.464250682 |
| Suco       | 59  | 1.658380296 | 1.705787185 | 0.047406888  | 0.27007781 | 0.464392058 |
| Ptrh2      | 14  | 2.307207305 | 2.573343773 | 0.266136468  | 0.2702414  | 0.464618892 |
| Ate1       | 69  | 3.347172883 | 2.416569029 | -0.930603855 | 0.27036963 | 0.464784903 |
| Crtap      | 14  | 1.325807334 | 1.72310483  | 0.397297496  | 0.27041176 | 0.46480288  |
| Tmem251    | 16  | 1.926835948 | 1.605591698 | -0.32124425  | 0.27052253 | 0.464829937 |
| Rpap2      | 16  | 1.184783961 | 0.747501738 | -0.437282223 | 0.2705136  | 0.464829937 |
| Rundc1     | 24  | 1.027419481 | 1.184293418 | 0.156873937  | 0.27047768 | 0.464829937 |
| Lca5l      | 33  | 1.769001826 | 1.269790786 | -0.49921104  | 0.27058335 | 0.464830331 |
| Slit3      | 36  | 47.51327043 | 47.55932518 | 0.046054751  | 0.27058612 | 0.464830331 |
| 230035I16R | 4   | 3.19029251  | 1.339285714 | -1.851006796 | 0.27087475 | 0.465271696 |
| Mir1932    | 78  | 1.747016187 | 1.414756133 | -0.332260054 | 0.27093342 | 0.465317993 |
| Col4a5     | 3   | 18.29521853 | 21.35416667 | 3.05894814   | 0.27099553 | 0.465370209 |
| Ctif       | 17  | 1.644249678 | 1.394424451 | -0.249825227 | 0.27110213 | 0.46549879  |
| Vmp1       | 34  | 1.584052002 | 1.727595582 | 0.14354358   | 0.27122284 | 0.465651568 |
| Spen       | 142 | 1.372521963 | 1.224180542 | -0.148341421 | 0.27144477 | 0.465978063 |
| Vcpip1     | 37  | 1.486309477 | 0.951827855 | -0.534481622 | 0.27172775 | 0.466354738 |
| Cobll1     | 167 | 1.378886211 | 1.40449778  | 0.02561157   | 0.27169924 | 0.466354738 |
| Rpl29      | 16  | 2.148409763 | 1.581016758 | -0.567393004 | 0.27190601 | 0.466561455 |
| Mir5619    | 31  | 1.102605496 | 0.877531111 | -0.225074386 | 0.27191179 | 0.466561455 |
| Proser3    | 2   | 5.163043478 | 2.923976608 | -2.23906687  | 0.27205823 | 0.46664903  |
| Gm38670    | 2   | 5.163043478 | 2.923976608 | -2.23906687  | 0.27205823 | 0.46664903  |
| Arhgef28   | 52  | 1.58710509  | 1.476431742 | -0.110673348 | 0.27205455 | 0.46664903  |
| 130593A02F | 27  | 1.917616452 | 2.26069304  | 0.343076587  | 0.27227305 | 0.466962923 |
| Ddx50      | 40  | 1.297356032 | 1.241439729 | -0.055916303 | 0.27232562 | 0.466998496 |
| Smc1b      | 10  | 73.0330128  | 71.07229386 | -1.960718938 | 0.27240287 | 0.467076391 |
| Gatad2a    | 171 | 1.439532126 | 1.2554217   | -0.184110425 | 0.2724508  | 0.467083176 |
| Gins4      | 34  | 1.098503233 | 1.296690453 | 0.198187219  | 0.27247049 | 0.467083176 |
| Kdm2a      | 132 | 1.792050632 | 1.7249427   | -0.067107932 | 0.27259956 | 0.467195269 |

|             |     |             |             |              |            |             |
|-------------|-----|-------------|-------------|--------------|------------|-------------|
| Gm4944      | 6   | 0.839237853 | 1.533465906 | 0.694228054  | 0.27258763 | 0.467195269 |
| Zfp786      | 22  | 1.386448469 | 1.299038463 | -0.087410007 | 0.27268997 | 0.467295647 |
| Anxa3       | 4   | 4.313832504 | 3.29809667  | -1.015735834 | 0.2727776  | 0.467391235 |
| Adgre5      | 40  | 18.40829048 | 19.20806188 | 0.7997714    | 0.27294884 | 0.467575443 |
| 10-Mar      | 12  | 21.50535902 | 23.81727232 | 2.3119133    | 0.2729334  | 0.467575443 |
| D11Wsu47e   | 23  | 1.242717816 | 0.840518017 | -0.402199798 | 0.2733484  | 0.467718357 |
| Tmem38a     | 23  | 0.906398594 | 1.023355304 | 0.11695671   | 0.27320564 | 0.467718357 |
| Dpf2        | 23  | 1.737988542 | 1.25809489  | -0.479893653 | 0.27331484 | 0.467718357 |
| Kcnd1       | 5   | 88.22571291 | 80.00565897 | -8.220053933 | 0.27332406 | 0.467718357 |
| Msto1       | 25  | 1.930810861 | 1.408669415 | -0.522141446 | 0.27332939 | 0.467718357 |
| Clk2        | 44  | 1.469827483 | 1.517855072 | 0.048027589  | 0.27338288 | 0.467718357 |
| Clk2-scamp3 | 44  | 1.469827483 | 1.517855072 | 0.048027589  | 0.27338288 | 0.467718357 |
| Tapbp       | 12  | 35.6389468  | 34.678241   | -0.960705805 | 0.27327125 | 0.467718357 |
| Acot8       | 27  | 1.042639531 | 1.135363856 | 0.092724325  | 0.27316703 | 0.467718357 |
| Flot1       | 25  | 1.919512476 | 2.033828601 | 0.114316125  | 0.27324721 | 0.467718357 |
| Pim1        | 141 | 1.180605685 | 1.043568317 | -0.137037367 | 0.27320454 | 0.467718357 |
| Mrps14      | 15  | 1.307105361 | 1.261053051 | -0.04605231  | 0.27354173 | 0.467935566 |
| Nudt21      | 14  | 0.842501471 | 0.830989626 | -0.011511845 | 0.27365154 | 0.468068856 |
| Vars2       | 38  | 1.704713101 | 1.373263059 | -0.331450042 | 0.27378557 | 0.468243531 |
| Sifn8       | 1   | 25.27472527 | 19.04761905 | -6.227106227 | 0.27383051 | 0.468265802 |
| Tekt4       | 7   | 33.68630447 | 34.03856129 | 0.352256821  | 0.27392585 | 0.468374256 |
| Dcaf11      | 31  | 1.212338228 | 1.308853844 | 0.096515616  | 0.27398992 | 0.468429224 |
| Actb        | 60  | 1.704286047 | 1.681847307 | -0.02243874  | 0.27418979 | 0.46862889  |
| Manbal      | 43  | 1.895426527 | 1.798878739 | -0.096547788 | 0.27418083 | 0.46862889  |
| Mars        | 49  | 1.621159986 | 1.409573443 | -0.211586543 | 0.27420251 | 0.46862889  |
| Kif13a      | 77  | 1.415929695 | 1.210251477 | -0.205678218 | 0.27431618 | 0.468713968 |
| Trappc13    | 16  | 1.44979158  | 1.045122305 | -0.404669274 | 0.27430897 | 0.468713968 |
| Dlat        | 54  | 1.488389129 | 1.073031062 | -0.415358067 | 0.2746049  | 0.469098054 |
| Dph7        | 4   | 3.741758242 | 3.110748454 | -0.631009787 | 0.27458471 | 0.469098054 |
| Sec14l5     | 8   | 4.54651745  | 3.25631938  | -1.29019807  | 0.27468442 | 0.469179283 |
| Eif4ebp1    | 58  | 2.237482554 | 1.659866413 | -0.577616141 | 0.27472442 | 0.469192993 |
| Tmprss13    | 4   | 11.72043011 | 10.37000366 | -1.350426443 | 0.27486559 | 0.469215636 |
| Adap1       | 109 | 1.22343868  | 1.04959909  | -0.17383959  | 0.27479229 | 0.469215636 |
| Eef2kmt     | 21  | 1.207159533 | 1.478851203 | 0.27169167   | 0.27482527 | 0.469215636 |

|            |     |             |             |              |            |             |
|------------|-----|-------------|-------------|--------------|------------|-------------|
| Zfp787     | 64  | 1.470157914 | 1.201217312 | -0.268940602 | 0.27484536 | 0.469215636 |
| Xpr1       | 39  | 1.563465396 | 1.216783895 | -0.3466815   | 0.27511063 | 0.469529667 |
| Adamts18   | 29  | 24.19972178 | 26.73605638 | 2.536334599  | 0.27511354 | 0.469529667 |
| 130571L13F | 20  | 2.330560536 | 1.979318368 | -0.351242168 | 0.27520562 | 0.469577593 |
| Deptor     | 61  | 1.269141923 | 1.377720806 | 0.108578883  | 0.27518883 | 0.469577593 |
| Tyw5       | 27  | 1.314715827 | 1.05824302  | -0.256472807 | 0.27542689 | 0.469884464 |
| Tia1       | 11  | 1.268884891 | 1.265685884 | -0.003199007 | 0.27544951 | 0.469884464 |
| Ccdc9      | 26  | 2.176063917 | 1.240752371 | -0.935311546 | 0.27555507 | 0.470009897 |
| Mdm4       | 29  | 2.202999038 | 1.780417212 | -0.422581827 | 0.27567705 | 0.470018684 |
| Sf3a3      | 20  | 1.450822046 | 1.536227321 | 0.085405276  | 0.27563047 | 0.470018684 |
| Tank       | 45  | 1.413187994 | 1.186364211 | -0.226823783 | 0.27567315 | 0.470018684 |
| Ddx6       | 72  | 1.408475707 | 1.118098993 | -0.290376714 | 0.27568835 | 0.470018684 |
| Brdt       | 2   | 96.07520993 | 94.16646933 | -1.908740596 | 0.27580174 | 0.47013189  |
| Abca2      | 119 | 1.041594676 | 0.956513957 | -0.085080719 | 0.27581882 | 0.47013189  |
| Trip13     | 27  | 1.765096885 | 1.32087217  | -0.444224715 | 0.27595781 | 0.470314158 |
| Gbf1       | 4   | 2.861895488 | 3.758938394 | 0.897042905  | 0.27627103 | 0.47047649  |
| Map2k3os   | 20  | 1.407287093 | 1.084508174 | -0.322778919 | 0.27627749 | 0.47047649  |
| Wdfy2      | 21  | 1.56285472  | 1.669211646 | 0.106356926  | 0.27625451 | 0.47047649  |
| 500020E01F | 99  | 0.953272153 | 1.163871989 | 0.210599835  | 0.27611876 | 0.47047649  |
| Mink1      | 64  | 0.906394539 | 0.974275778 | 0.067881239  | 0.27612485 | 0.47047649  |
| Cry2       | 22  | 1.685072859 | 1.222757741 | -0.462315118 | 0.27618995 | 0.47047649  |
| Cptp       | 17  | 0.794038799 | 1.127816817 | 0.333778018  | 0.27619546 | 0.47047649  |
| Pitpnm3    | 84  | 2.582356211 | 2.073106506 | -0.509249704 | 0.27657431 | 0.47087265  |
| Scai       | 23  | 1.061064952 | 0.919087471 | -0.141977481 | 0.27655604 | 0.47087265  |
| Tnrc18     | 31  | 1.164768024 | 1.13142559  | -0.033342433 | 0.27668208 | 0.471001482 |
| Lasp1      | 48  | 1.266207157 | 1.012411228 | -0.253795929 | 0.27675579 | 0.471052332 |
| Socs4      | 44  | 1.415875596 | 1.256273179 | -0.159602417 | 0.27677615 | 0.471052332 |
| Napb       | 18  | 2.040879489 | 1.833002559 | -0.20787693  | 0.27694935 | 0.471197175 |
| 30028M14f  | 1   | 58.97435897 | 50          | -8.974358974 | 0.27695759 | 0.471197175 |
| Lxn        | 14  | 2.416942517 | 2.013928    | -0.403014517 | 0.27693117 | 0.471197175 |
| Ttll5      | 13  | 1.252808961 | 1.091109291 | -0.16169967  | 0.27729703 | 0.47171998  |
| Gls2       | 34  | 1.000581176 | 1.143554553 | 0.142973376  | 0.27739096 | 0.471770395 |
| Fam126a    | 49  | 1.111782356 | 1.333996132 | 0.222213775  | 0.27736181 | 0.471770395 |
| Dand5      | 9   | 1.437073347 | 0.866030826 | -0.57104252  | 0.27744443 | 0.471806645 |

|            |     |             |             |              |            |             |
|------------|-----|-------------|-------------|--------------|------------|-------------|
| Lmnb1      | 66  | 1.172307877 | 1.006915592 | -0.165392286 | 0.27757205 | 0.471859623 |
| Areg       | 22  | 2.413929685 | 2.227116629 | -0.186813056 | 0.27753125 | 0.471859623 |
| Jade2      | 12  | 1.28477309  | 1.416989921 | 0.132216831  | 0.27756578 | 0.471859623 |
| Fbxl2      | 48  | 1.21641577  | 1.011961801 | -0.204453969 | 0.27770599 | 0.472032633 |
| Ap3d1      | 35  | 1.243491742 | 1.267751567 | 0.024259825  | 0.27780348 | 0.472143644 |
| Zfp811     | 2   | 28.62909486 | 27.1071115  | -1.52198336  | 0.27787479 | 0.472210147 |
| Ier5       | 2   | 1.648351648 | 1.957232168 | 0.30888052   | 0.27795046 | 0.472235975 |
| Arih2      | 33  | 1.695195371 | 1.323789058 | -0.371406313 | 0.27798653 | 0.472235975 |
| Rbm12b2    | 5   | 1.408450704 | 2.079207921 | 0.670757217  | 0.27798316 | 0.472235975 |
| .30040H23F | 4   | 8.246228926 | 10.52631579 | 2.280086863  | 0.27802518 | 0.472246957 |
| Trim59     | 126 | 1.238452682 | 1.200153408 | -0.038299274 | 0.27840632 | 0.472839629 |
| Atad2      | 84  | 1.178887447 | 1.056101329 | -0.122786118 | 0.27881067 | 0.473471568 |
| Zfp26      | 20  | 1.297669722 | 1.825220431 | 0.527550709  | 0.27895963 | 0.473660097 |
| Top2b      | 78  | 1.12394821  | 1.098763499 | -0.025184711 | 0.27898625 | 0.473660097 |
| Myl6       | 1   | 2.390438247 | 4.05904059  | 1.668602343  | 0.27905241 | 0.473717609 |
| Tjp1       | 85  | 1.651333641 | 1.662597094 | 0.011263453  | 0.27919189 | 0.473789956 |
| Ccdc151    | 12  | 46.32330775 | 47.91542402 | 1.592116277  | 0.27916544 | 0.473789956 |
| Atxn2      | 126 | 0.952443321 | 0.842867697 | -0.109575624 | 0.27918073 | 0.473789956 |
| Napg       | 17  | 1.065655709 | 1.496152104 | 0.430496395  | 0.27927792 | 0.473881149 |
| Mboat1     | 24  | 1.8389308   | 1.759107022 | -0.079823777 | 0.2796215  | 0.474299601 |
| Oat        | 51  | 2.032989869 | 2.055403148 | 0.022413278  | 0.27956486 | 0.474299601 |
| 510037L13F | 13  | 2.53309914  | 2.00727706  | -0.52582208  | 0.27961725 | 0.474299601 |
| Cdk18      | 39  | 2.38172408  | 1.865397138 | -0.516326942 | 0.27967014 | 0.474327287 |
| Mien1      | 35  | 1.469299295 | 1.495747952 | 0.026448657  | 0.27971643 | 0.47435097  |
| Med27      | 22  | 2.551699953 | 2.176215564 | -0.375484389 | 0.27992963 | 0.474657661 |
| Cers6      | 38  | 1.028953056 | 1.330194282 | 0.301241226  | 0.28010718 | 0.474794132 |
| Paqr3      | 23  | 1.747208614 | 1.678115632 | -0.069092982 | 0.2801048  | 0.474794132 |
| Zfp607     | 10  | 2.105820979 | 1.879337695 | -0.226483285 | 0.28008078 | 0.474794132 |
| Serbp1     | 43  | 1.357396191 | 1.153958656 | -0.203437535 | 0.28018944 | 0.474868583 |
| Pfkfb2     | 12  | 1.713723906 | 2.412929522 | 0.699205615  | 0.28021583 | 0.474868583 |
| Psmc4      | 17  | 1.945160086 | 1.318341197 | -0.626818889 | 0.28036554 | 0.475067422 |
| Pcxl2      | 35  | 21.28559932 | 21.40661328 | 0.121013959  | 0.28041468 | 0.475095825 |
| Spata7     | 13  | 4.160167283 | 3.467210877 | -0.692956406 | 0.28065795 | 0.475453099 |
| Xpnpep3    | 39  | 1.432918983 | 1.403628572 | -0.02929041  | 0.28073024 | 0.475520668 |

|            |     |             |             |              |            |             |
|------------|-----|-------------|-------------|--------------|------------|-------------|
| Serpine1   | 7   | 2.368530148 | 1.737218018 | -0.63131213  | 0.28079728 | 0.47555099  |
| Tmem243    | 77  | 1.085671669 | 1.026305669 | -0.059366    | 0.28081296 | 0.47555099  |
| Gm20257    | 18  | 1.734789324 | 1.556717643 | -0.178071681 | 0.28098541 | 0.475788135 |
| Gnl3       | 19  | 1.369376082 | 1.121301562 | -0.248074519 | 0.28109508 | 0.47580911  |
| Orc6       | 17  | 0.561587751 | 0.495012561 | -0.06657519  | 0.28103838 | 0.47580911  |
| Myo5c      | 38  | 40.68551775 | 39.0178996  | -1.667618145 | 0.28108959 | 0.47580911  |
| Pde2a      | 64  | 4.144973187 | 3.341039363 | -0.803933824 | 0.28129885 | 0.476099108 |
| Snip1      | 58  | 1.198580438 | 0.996093465 | -0.202486973 | 0.28146443 | 0.476252862 |
| Sipa1      | 18  | 1.385208289 | 1.912248606 | 0.527040317  | 0.28148706 | 0.476252862 |
| '30559C18F | 32  | 2.45009388  | 2.194118635 | -0.255975244 | 0.28142951 | 0.476252862 |
| Cluap1     | 11  | 0.903395172 | 1.105170055 | 0.201774883  | 0.28152906 | 0.476269013 |
| Zer1       | 36  | 2.870281544 | 2.603145586 | -0.267135958 | 0.28168799 | 0.476482947 |
| Slc25a39   | 74  | 0.974095658 | 1.162910126 | 0.188814468  | 0.28180484 | 0.476625667 |
| Klf2       | 9   | 1.510238462 | 1.735949046 | 0.225710584  | 0.28205117 | 0.476932337 |
| Hspa13     | 10  | 1.801971798 | 1.492631382 | -0.309340416 | 0.28203658 | 0.476932337 |
| Pomgnt2    | 25  | 1.457033775 | 1.269524973 | -0.187508802 | 0.28212071 | 0.476994969 |
| Zfp251     | 12  | 1.12623262  | 1.650101137 | 0.523868517  | 0.28224561 | 0.477151161 |
| Cldn7      | 23  | 23.23376407 | 26.34752436 | 3.11376029   | 0.28228213 | 0.477157928 |
| Samd8      | 59  | 1.845548181 | 1.495176926 | -0.350371256 | 0.28242972 | 0.477352418 |
| Btbd8      | 52  | 1.105617142 | 1.116203552 | 0.01058641   | 0.2825775  | 0.477547189 |
| Fam134b    | 49  | 2.157894135 | 2.029808295 | -0.12808584  | 0.28277725 | 0.477829727 |
| Znrf2      | 150 | 1.03327634  | 0.950844421 | -0.082431919 | 0.28287915 | 0.477892006 |
| 131408D14F | 1   | 31.19266055 | 25          | -6.19266055  | 0.28287924 | 0.477892006 |
| Cdc42se1   | 35  | 1.656681596 | 1.564125746 | -0.09255585  | 0.28293376 | 0.477929082 |
| Ctbp1      | 102 | 1.378713359 | 1.094933573 | -0.283779787 | 0.28298887 | 0.477967155 |
| Klhl32     | 53  | 6.999148649 | 8.457385569 | 1.45823692   | 0.28306987 | 0.478048948 |
| Sh3bp5l    | 2   | 1.257861635 | 1.906779661 | 0.648918026  | 0.28321184 | 0.478233669 |
| Fam133b    | 74  | 1.128109126 | 1.111744139 | -0.016364987 | 0.28348879 | 0.478646238 |
| Galt       | 11  | 3.182939245 | 2.332694778 | -0.850244467 | 0.28352578 | 0.478653625 |
| Rsf1       | 37  | 1.272523738 | 1.086972521 | -0.185551217 | 0.28367445 | 0.478849515 |
| Dock9      | 113 | 2.203006961 | 2.595863571 | 0.39285661   | 0.28372183 | 0.478874404 |
| Ing4       | 7   | 1.809739381 | 1.771804468 | -0.037934913 | 0.28375717 | 0.478878972 |
| Dynlt1a    | 14  | 2.021320875 | 1.086414609 | -0.934906266 | 0.28380826 | 0.478910123 |
| Cdca7      | 16  | 1.11963657  | 0.849574255 | -0.270062315 | 0.2840792  | 0.479222659 |



|             |     |             |             |              |            |             |
|-------------|-----|-------------|-------------|--------------|------------|-------------|
| 700066J03R  | 1   | 100         | 99.26470588 | -0.735294118 | 0.2840731  | 0.479222659 |
| P2ry2       | 18  | 1.54222065  | 0.767396757 | -0.774823893 | 0.28409145 | 0.479222659 |
| Rbm26       | 61  | 1.40973413  | 1.204402104 | -0.205332026 | 0.28422345 | 0.479390226 |
| Bsg         | 7   | 1.706300635 | 1.552660705 | -0.15363993  | 0.28456759 | 0.479915502 |
| Tomm40      | 57  | 1.158793782 | 1.459788388 | 0.300994606  | 0.28468062 | 0.479995803 |
| 131406C07F  | 26  | 0.798523877 | 0.975338936 | 0.176815059  | 0.28465447 | 0.479995803 |
| Mtrf1l      | 34  | 0.731255059 | 1.097044913 | 0.365789854  | 0.28477675 | 0.480102717 |
| Rrp12       | 17  | 10.28875903 | 11.51030774 | 1.221548713  | 0.28492178 | 0.480292047 |
| Set         | 90  | 1.181328551 | 1.303964578 | 0.122636027  | 0.28541542 | 0.481068908 |
| Tmem206     | 53  | 1.271433845 | 1.066117466 | -0.205316378 | 0.28563378 | 0.48125644  |
| Cables2     | 46  | 1.607511172 | 1.411472826 | -0.196038346 | 0.28559322 | 0.48125644  |
| Epb4.1l4aos | 54  | 2.249669482 | 1.50472368  | -0.744945802 | 0.2856409  | 0.48125644  |
| Kbtbd7      | 43  | 1.098131124 | 0.910188799 | -0.187942325 | 0.28565787 | 0.48125644  |
| Haus6       | 25  | 1.006874979 | 1.318235082 | 0.311360103  | 0.28587675 | 0.481530582 |
| Csnk1g1     | 17  | 2.484965086 | 1.932679233 | -0.552285853 | 0.28588622 | 0.481530582 |
| Dusp16      | 71  | 1.207167865 | 1.090167582 | -0.117000283 | 0.28600034 | 0.481667511 |
| Tuba8       | 1   | 32.32323232 | 25.92592593 | -6.397306397 | 0.2860907  | 0.481709116 |
| Natd1       | 38  | 1.43657445  | 1.095314674 | -0.341259776 | 0.28608253 | 0.481709116 |
| Ppp4r1      | 208 | 1.09523718  | 1.108819628 | 0.013582448  | 0.28616847 | 0.481729508 |
| Fbxw17      | 16  | 2.336369264 | 2.256415893 | -0.079953371 | 0.2861501  | 0.481729508 |
| Trmt1l      | 7   | 1.508738734 | 1.47484946  | -0.033889275 | 0.28629551 | 0.481777566 |
| Mob1b       | 26  | 1.75104859  | 1.72397562  | -0.027072969 | 0.28626411 | 0.481777566 |
| Vhl         | 47  | 1.300743734 | 1.403780709 | 0.103036974  | 0.28627668 | 0.481777566 |
| Fnta        | 62  | 0.89723067  | 0.930826562 | 0.033595892  | 0.28637405 | 0.481854469 |
| Zswim4      | 41  | 2.047921448 | 1.904443873 | -0.143477574 | 0.28644575 | 0.481903064 |
| 110069G16F  | 28  | 43.09402983 | 41.39730769 | -1.696722141 | 0.28646861 | 0.481903064 |
| Paip2b      | 16  | 1.187776224 | 0.745686384 | -0.44208984  | 0.28664917 | 0.482030028 |
| Bad         | 40  | 0.957443486 | 1.047504009 | 0.090060523  | 0.28658685 | 0.482030028 |
| Zfp532      | 18  | 1.793994019 | 1.770676512 | -0.023317507 | 0.28667548 | 0.482030028 |
| Prr3        | 57  | 1.08377731  | 0.924289267 | -0.159488043 | 0.28666303 | 0.482030028 |
| Stambpl1    | 43  | 1.604102545 | 1.300542519 | -0.303560026 | 0.28671036 | 0.482033434 |
| Crct1       | 4   | 68.46285869 | 66.14340249 | -2.319456204 | 0.28720788 | 0.482814578 |
| Chtf8       | 76  | 1.114583039 | 1.236442302 | 0.121859263  | 0.28748062 | 0.483162361 |
| Cblb        | 49  | 1.104435627 | 0.910469849 | -0.193965778 | 0.28746011 | 0.483162361 |

|            |     |             |             |              |            |             |
|------------|-----|-------------|-------------|--------------|------------|-------------|
| Gm15708    | 1   | 74.53703704 | 78.65168539 | 4.114648356  | 0.28751581 | 0.483166165 |
| Dexi       | 15  | 2.425577152 | 1.760156813 | -0.66542034  | 0.28761095 | 0.483270711 |
| Gnpda1     | 33  | 1.428917943 | 0.963168905 | -0.465749039 | 0.28772509 | 0.483351801 |
| Mark2      | 60  | 1.900237557 | 1.749223968 | -0.15101359  | 0.28769636 | 0.483351801 |
| Zfp445     | 36  | 1.263581385 | 1.429092704 | 0.16551132   | 0.2879784  | 0.483721957 |
| 700084E18F | 21  | 1.687318083 | 1.939697392 | 0.252379309  | 0.28814162 | 0.483885338 |
| Chchd4     | 14  | 0.815695295 | 0.505865137 | -0.309830158 | 0.28811831 | 0.483885338 |
| Mfsd4      | 41  | 3.523685705 | 3.197383386 | -0.32630232  | 0.28830554 | 0.484105222 |
| Gid8       | 66  | 1.113029356 | 0.941269366 | -0.17175999  | 0.2885693  | 0.48438183  |
| Dnajc17    | 7   | 0.357142857 | 1.169678398 | 0.812535541  | 0.28856676 | 0.48438183  |
| Polr3k     | 11  | 1.420467546 | 0.889446476 | -0.531021071 | 0.28851996 | 0.48438183  |
| Jtb        | 45  | 2.252246391 | 2.315595146 | 0.063348755  | 0.28862051 | 0.48441238  |
| Usb1       | 53  | 1.170778265 | 1.27077678  | 0.099998515  | 0.28867838 | 0.484454086 |
| Map3k12    | 30  | 1.725847865 | 1.731863197 | 0.006015332  | 0.28873206 | 0.484488768 |
| Spred2     | 12  | 1.62005703  | 2.456562092 | 0.836505062  | 0.28896388 | 0.484822322 |
| Pnck       | 17  | 15.08339027 | 16.06257611 | 0.979185837  | 0.28906144 | 0.484875131 |
| Adrbk1     | 79  | 1.442654061 | 1.312800888 | -0.129853172 | 0.28904243 | 0.484875131 |
| Erc1       | 20  | 1.373572755 | 1.507990411 | 0.134417656  | 0.28912838 | 0.484931976 |
| Amotl1     | 24  | 3.662140034 | 3.210218436 | -0.451921598 | 0.28935886 | 0.485263078 |
| 30443J06R  | 5   | 0.555555556 | 2.564102564 | 2.008547009  | 0.28944584 | 0.485353475 |
| Ccdc174    | 3   | 2.063301282 | 1.193145213 | -0.870156069 | 0.28953435 | 0.485446425 |
| Mapt       | 41  | 1.187507944 | 0.97078495  | -0.216722995 | 0.28962819 | 0.48549281  |
| Ptch1      | 129 | 1.309540901 | 1.269423304 | -0.040117597 | 0.28960003 | 0.48549281  |
| Dbn1       | 31  | 1.636066009 | 1.147366181 | -0.488699828 | 0.28966473 | 0.485498601 |
| Herc6      | 3   | 2.065435281 | 0.872196645 | -1.193238636 | 0.28971005 | 0.485519101 |
| Fbxl19     | 42  | 2.636030239 | 2.388651591 | -0.247378648 | 0.28974361 | 0.485519905 |
| Tssc1      | 14  | 1.594416209 | 1.159000338 | -0.435415871 | 0.28988134 | 0.48558346  |
| Wwp1       | 76  | 1.156452109 | 1.182372751 | 0.025920642  | 0.28984847 | 0.48558346  |
| Rps15      | 61  | 1.274881966 | 1.221947701 | -0.052934265 | 0.28988484 | 0.48558346  |
| Becn1      | 43  | 1.261798212 | 1.150049697 | -0.111748516 | 0.28991391 | 0.48558346  |
| Tmem150b   | 2   | 21.46212566 | 25.36231884 | 3.90019318   | 0.28996162 | 0.485607951 |
| Nsa2       | 8   | 0.997018666 | 1.051378768 | 0.054360102  | 0.29010887 | 0.485799109 |
| Oxct2a     | 6   | 15.44117647 | 12.97893822 | -2.46223825  | 0.29038853 | 0.486181567 |
| Gm10125    | 78  | 0.985184773 | 1.023597575 | 0.038412801  | 0.29040353 | 0.486181567 |

|            |     |             |             |              |            |             |
|------------|-----|-------------|-------------|--------------|------------|-------------|
| Rnf145     | 79  | 1.193361428 | 1.100798634 | -0.092562794 | 0.29048082 | 0.486230234 |
| Hectd1     | 164 | 0.870106527 | 0.859298249 | -0.010808278 | 0.29049887 | 0.486230234 |
| Kdsr       | 50  | 2.19851449  | 1.921131568 | -0.277382921 | 0.29058461 | 0.486262804 |
| Glul       | 38  | 1.399258487 | 1.453862819 | 0.054604332  | 0.29055378 | 0.486262804 |
| S100pbp    | 12  | 1.519790037 | 1.549415489 | 0.029625452  | 0.29069304 | 0.486388796 |
| Rbm42      | 40  | 1.198463717 | 1.203976159 | 0.005512442  | 0.29084353 | 0.486576057 |
| Ivns1abp   | 54  | 1.501784441 | 1.016433097 | -0.485351344 | 0.29087128 | 0.486576057 |
| Atp6v1g2   | 7   | 1.781190117 | 2.288181221 | 0.506991104  | 0.29094214 | 0.486619762 |
| Cdc73      | 85  | 0.839985613 | 0.971544136 | 0.131558523  | 0.29103006 | 0.486619762 |
| Adh5       | 52  | 1.388726933 | 1.061096486 | -0.327630448 | 0.29100983 | 0.486619762 |
| Wdr5b      | 5   | 2.684282794 | 2.905766399 | 0.221483605  | 0.29097037 | 0.486619762 |
| Cd274      | 2   | 2.84436562  | 4.024628555 | 1.180262936  | 0.29126233 | 0.486952659 |
| Sp4        | 113 | 1.304572821 | 1.111260936 | -0.193311885 | 0.29135785 | 0.487001374 |
| Ugp2       | 57  | 1.027001603 | 1.144983632 | 0.117982028  | 0.29133102 | 0.487001374 |
| Crip2      | 67  | 1.574148009 | 1.378775345 | -0.195372664 | 0.29164226 | 0.487354342 |
| I21536K21F | 15  | 2.273589598 | 1.478518811 | -0.795070787 | 0.29165512 | 0.487354342 |
| Ahsa1      | 12  | 0.912168817 | 1.530654533 | 0.618485716  | 0.29166865 | 0.487354342 |
| Kifap3     | 17  | 1.167050914 | 1.250049862 | 0.082998948  | 0.2917403  | 0.48741856  |
| Ccdc62     | 33  | 1.638146633 | 1.091562736 | -0.546583897 | 0.29204016 | 0.487775643 |
| Yars2      | 42  | 0.886974069 | 1.084657959 | 0.19768389   | 0.29205376 | 0.487775643 |
| Snrpe      | 46  | 0.578871145 | 0.617485594 | 0.038614449  | 0.29199189 | 0.487775643 |
| Dtx2       | 4   | 2.836021505 | 4.771505376 | 1.935483871  | 0.29220096 | 0.487965954 |
| Tbk1       | 68  | 1.450153183 | 1.342238401 | -0.107914782 | 0.29229575 | 0.48806871  |
| R74862     | 2   | 3.939262087 | 3.513149268 | -0.426112819 | 0.29260013 | 0.488452965 |
| Fbxo6      | 32  | 1.32780268  | 1.434416608 | 0.106613928  | 0.29261289 | 0.488452965 |
| Man2c1os   | 7   | 0.760431154 | 0.440249433 | -0.320181721 | 0.29262573 | 0.488452965 |
| Tbrg3      | 10  | 1.012891566 | 1.349835661 | 0.336944095  | 0.29266121 | 0.488456622 |
| Soat1      | 25  | 0.574710102 | 0.739291099 | 0.164580997  | 0.29283303 | 0.488627232 |
| Cd24a      | 56  | 1.571648072 | 1.384985411 | -0.186662661 | 0.29286333 | 0.488627232 |
| Lincpint   | 15  | 2.173489297 | 2.06741452  | -0.106074776 | 0.29281686 | 0.488627232 |
| Trim56     | 4   | 4.767887849 | 4.025712344 | -0.742175505 | 0.29293912 | 0.488642565 |
| Ubald1     | 72  | 1.294223395 | 1.133685457 | -0.160537938 | 0.29291672 | 0.488642565 |
| Lincenc1   | 4   | 80.15298634 | 77.87163703 | -2.281349311 | 0.2930344  | 0.488745939 |
| P4ha1      | 81  | 1.556111905 | 1.386738436 | -0.169373469 | 0.29320681 | 0.48892236  |

|            |     |             |             |              |            |             |
|------------|-----|-------------|-------------|--------------|------------|-------------|
| Pdlim1     | 70  | 4.339869084 | 3.671529706 | -0.668339378 | 0.29320458 | 0.48892236  |
| Xylb       | 5   | 3.141940048 | 2.136761494 | -1.005178555 | 0.29331045 | 0.489039608 |
| Taf2       | 38  | 2.166230297 | 1.431750518 | -0.734479779 | 0.29337475 | 0.489091239 |
| Zxdc       | 56  | 1.139019708 | 1.224634635 | 0.085614927  | 0.29343592 | 0.489137637 |
| Xab2       | 12  | 1.55725938  | 2.147634621 | 0.59037524   | 0.29362662 | 0.489399931 |
| Wisp1      | 2   | 36.6114149  | 31.46551724 | -5.14589766  | 0.29379111 | 0.489475074 |
| Gm20337    | 22  | 1.606714657 | 1.3321699   | -0.274544757 | 0.29374443 | 0.489475074 |
| I30408G22F | 5   | 7.867160617 | 6.344405694 | -1.522754923 | 0.29380513 | 0.489475074 |
| Scyl2      | 33  | 1.151267382 | 0.954342696 | -0.196924685 | 0.29373593 | 0.489475074 |
| Bmp2k      | 155 | 1.15821581  | 1.029995671 | -0.128220139 | 0.29394094 | 0.489645743 |
| Bhlhe40    | 19  | 2.797554033 | 2.089692516 | -0.707861517 | 0.29406166 | 0.489784541 |
| Bcan       | 73  | 14.43442946 | 15.30763127 | 0.87320181   | 0.29409102 | 0.489784541 |
| Trib1      | 103 | 1.588801597 | 1.33547129  | -0.253330308 | 0.29419507 | 0.489902231 |
| Lig1       | 11  | 0.767113261 | 0.483320135 | -0.283793126 | 0.29424062 | 0.489912131 |
| Sfxn4      | 2   | 0.806451613 | 3.246753247 | 2.440301634  | 0.29426779 | 0.489912131 |
| Bag5       | 65  | 1.218663147 | 1.056013736 | -0.162649412 | 0.29433659 | 0.489971085 |
| Xrcc3      | 11  | 1.127469761 | 0.244062244 | -0.883407517 | 0.29466129 | 0.490455966 |
| Vwc2       | 18  | 44.0271353  | 48.64319105 | 4.616055743  | 0.29472828 | 0.4904562   |
| Dopey2     | 50  | 1.257351681 | 1.247880108 | -0.009471573 | 0.29471767 | 0.4904562   |
| Zfyve21    | 48  | 1.218582485 | 1.17159357  | -0.046988915 | 0.29497015 | 0.490712882 |
| Ptcd2      | 22  | 1.432556358 | 1.269173575 | -0.163382783 | 0.29495852 | 0.490712882 |
| Tmed2      | 85  | 1.181917685 | 1.106923732 | -0.074993953 | 0.29501629 | 0.490712882 |
| Mrps35     | 52  | 0.959564068 | 1.056221462 | 0.096657395  | 0.29499832 | 0.490712882 |
| Adar       | 26  | 4.497898074 | 3.591805969 | -0.906092105 | 0.29510081 | 0.490797831 |
| Pink1      | 74  | 1.522814263 | 1.323216853 | -0.199597411 | 0.29520789 | 0.490920275 |
| Anapc11    | 44  | 0.730037174 | 0.763979348 | 0.033942174  | 0.29534697 | 0.491040268 |
| Ptpn2      | 70  | 1.257451681 | 1.157546633 | -0.099905048 | 0.29534497 | 0.491040268 |
| Prdm15     | 111 | 1.24567146  | 1.257228559 | 0.011557099  | 0.29561757 | 0.491386189 |
| Slc25a35   | 29  | 1.656894832 | 1.982316714 | 0.325421883  | 0.295622   | 0.491386189 |
| Nrg1       | 4   | 87.64858766 | 88.65274131 | 1.004153645  | 0.29568007 | 0.49142704  |
| Rhot2      | 14  | 2.001176092 | 2.458041405 | 0.456865313  | 0.29581276 | 0.491591889 |
| Ift81      | 30  | 1.710220302 | 1.202097587 | -0.508122714 | 0.29592988 | 0.491683876 |
| Bcl7c      | 48  | 1.145481193 | 0.983130524 | -0.162350669 | 0.29593512 | 0.491683876 |
| Commd3     | 19  | 0.565778472 | 0.696418903 | 0.130640431  | 0.29599742 | 0.491731696 |

|            |     |             |             |              |            |             |
|------------|-----|-------------|-------------|--------------|------------|-------------|
| Figl1      | 19  | 0.462568727 | 0.852270096 | 0.389701369  | 0.29636734 | 0.492290504 |
| Col6a2     | 13  | 1.829473729 | 1.820610331 | -0.008863398 | 0.296498   | 0.492435133 |
| Lamtor1    | 45  | 1.342279505 | 1.076047649 | -0.266231857 | 0.2966222  | 0.492435133 |
| Al197445   | 2   | 6.767549391 | 10          | 3.232450609  | 0.29655946 | 0.492435133 |
| Pm20d2     | 9   | 1.888313447 | 1.135059269 | -0.753254178 | 0.29661562 | 0.492435133 |
| Tomt       | 45  | 1.342279505 | 1.076047649 | -0.266231857 | 0.2966222  | 0.492435133 |
| Gbbp1l1    | 79  | 1.289239987 | 1.36126691  | 0.072026923  | 0.29697062 | 0.492846293 |
| Ncdn       | 16  | 1.34439901  | 1.585417884 | 0.241018875  | 0.29695138 | 0.492846293 |
| Ctc1       | 15  | 0.954752525 | 0.66673759  | -0.288014935 | 0.29694056 | 0.492846293 |
| Sh3bgrl3   | 18  | 2.372028265 | 1.728545022 | -0.643483243 | 0.29748752 | 0.493648302 |
| Tcf7l1     | 82  | 2.548404556 | 2.599842456 | 0.051437901  | 0.29789612 | 0.494270429 |
| l30544D05F | 9   | 48.42997262 | 50.68280089 | 2.252828269  | 0.29805635 | 0.494368587 |
| Sirt2      | 28  | 1.447382588 | 1.85491093  | 0.407528342  | 0.29804061 | 0.494368587 |
| Pyroxd1    | 23  | 1.517247709 | 0.992562229 | -0.52468548  | 0.29799994 | 0.494368587 |
| Pop1       | 37  | 1.439359375 | 1.421952471 | -0.017406904 | 0.29823915 | 0.494615884 |
| Gk2        | 2   | 96.95820318 | 98.5244641  | 1.566260914  | 0.29827315 | 0.494616359 |
| Ttc37      | 4   | 0.563909774 | 1.226993865 | 0.663084091  | 0.29835114 | 0.494689787 |
| Hmox2      | 24  | 1.141043401 | 0.826306844 | -0.314736557 | 0.29867512 | 0.495171014 |
| Ruvbl2     | 7   | 3.209529324 | 1.252821495 | -1.956707829 | 0.29894141 | 0.495500544 |
| Dse        | 40  | 1.343221237 | 1.569503449 | 0.226282211  | 0.29894099 | 0.495500544 |
| Srsf2      | 84  | 1.177592534 | 0.97710453  | -0.200488004 | 0.2990387  | 0.49560582  |
| Wnt10b     | 23  | 14.66903845 | 16.53636691 | 1.867328462  | 0.29913214 | 0.495704697 |
| Cd3eap     | 24  | 2.12180191  | 1.89541937  | -0.226382541 | 0.29927491 | 0.495885271 |
| Gm38413    | 2   | 85.95559846 | 82.23529412 | -3.720304338 | 0.29938056 | 0.495892343 |
| Snrnp27    | 11  | 0.728887564 | 1.365910808 | 0.637023244  | 0.29935265 | 0.495892343 |
| Agtppb1    | 170 | 1.072759266 | 1.172197163 | 0.099437897  | 0.29932373 | 0.495892343 |
| l33412E12F | 20  | 1.773997064 | 1.671090347 | -0.102906717 | 0.29953195 | 0.496087107 |
| Zfp687     | 79  | 1.429849925 | 1.672948597 | 0.243098672  | 0.29960569 | 0.496153247 |
| Diap2      | 43  | 15.17722649 | 15.68804081 | 0.510814319  | 0.2996861  | 0.496230395 |
| Ndfip1     | 87  | 1.345705964 | 1.260155333 | -0.08555063  | 0.29973711 | 0.496258861 |
| Cars       | 18  | 0.987587258 | 0.71874092  | -0.268846338 | 0.29991802 | 0.49650237  |
| Fis1       | 24  | 2.796890326 | 1.873802953 | -0.923087372 | 0.30002446 | 0.496622547 |
| Ampd2      | 65  | 1.652029703 | 1.482968105 | -0.169061598 | 0.30007182 | 0.496644928 |
| Acot6      | 7   | 5.129224016 | 5.354207789 | 0.224983774  | 0.30021046 | 0.496818344 |

|            |     |             |             |              |            |             |
|------------|-----|-------------|-------------|--------------|------------|-------------|
| Zfp319     | 96  | 1.287907311 | 1.236312832 | -0.051594479 | 0.3002768  | 0.496872095 |
| Hiat1      | 79  | 1.013036089 | 1.141229135 | 0.128193046  | 0.30036837 | 0.496911554 |
| Sema6c     | 22  | 1.555638489 | 1.277755285 | -0.277883204 | 0.3003442  | 0.496911554 |
| Cxcl5      | 8   | 6.726972374 | 6.040768366 | -0.686204007 | 0.30071649 | 0.497431377 |
| Usf1       | 61  | 1.40062702  | 1.514002403 | 0.113375383  | 0.30082566 | 0.497555878 |
| Zfp113     | 16  | 1.121466466 | 1.602162943 | 0.480696477  | 0.30091104 | 0.497641009 |
| Leo1       | 10  | 2.623598338 | 2.134322409 | -0.489275929 | 0.30105121 | 0.497650428 |
| Lgalsl     | 105 | 1.181443551 | 1.03592239  | -0.14552116  | 0.3010524  | 0.497650428 |
| Cyb561a3   | 5   | 1.17936521  | 1.900645161 | 0.721279952  | 0.30098002 | 0.497650428 |
| Tagln      | 19  | 65.52767825 | 63.76038059 | -1.767297651 | 0.30099501 | 0.497650428 |
| Rbm3       | 17  | 16.47490699 | 19.88014037 | 3.405233376  | 0.30119149 | 0.497824275 |
| Mdm2       | 66  | 4.74152761  | 4.190539902 | -0.550987708 | 0.30125465 | 0.497872595 |
| Rab13      | 16  | 4.913941056 | 4.015377952 | -0.898563104 | 0.30189533 | 0.498852567 |
| Metap1d    | 28  | 1.369400564 | 1.383053376 | 0.013652812  | 0.30191561 | 0.498852567 |
| Snord42b   | 7   | 1.744803572 | 2.520929259 | 0.776125687  | 0.3020156  | 0.498905426 |
| Rpl23a     | 7   | 1.744803572 | 2.520929259 | 0.776125687  | 0.3020156  | 0.498905426 |
| Tiprl      | 12  | 0.670960816 | 0.957715573 | 0.286754757  | 0.30217807 | 0.499100517 |
| Pusl1      | 6   | 2.428971399 | 1.881035942 | -0.547935457 | 0.30220172 | 0.499100517 |
| Sp2        | 49  | 1.233112526 | 1.362159719 | 0.129047193  | 0.3023486  | 0.499286903 |
| Zfp3611    | 7   | 0.757689799 | 1.060070079 | 0.302380281  | 0.30280734 | 0.499988174 |
| Camk4      | 50  | 4.922408831 | 5.182245772 | 0.259836941  | 0.30287788 | 0.500026387 |
| Zwint      | 8   | 2.316662262 | 0.810657596 | -1.506004666 | 0.30289863 | 0.500026387 |
| Lman2l     | 35  | 1.439658267 | 1.262492176 | -0.17716609  | 0.30297508 | 0.50009633  |
| Rps4l      | 21  | 87.92712008 | 86.34403715 | -1.583082936 | 0.30303221 | 0.500134358 |
| Wdr12      | 37  | 1.103827365 | 1.260021718 | 0.156194352  | 0.30306992 | 0.500140352 |
| Rnf167     | 8   | 0.974557697 | 1.322083249 | 0.347525552  | 0.30341138 | 0.500462263 |
| Slc25a13   | 38  | 1.899750808 | 1.671904688 | -0.22784612  | 0.30344327 | 0.500462263 |
| Sdhd       | 3   | 2.683178535 | 3.452473845 | 0.769295311  | 0.30352883 | 0.500462263 |
| Mab21l1    | 3   | 74.72798368 | 76.69551206 | 1.967528383  | 0.30338181 | 0.500462263 |
| Tmem107    | 31  | 1.002708223 | 1.211389795 | 0.208681573  | 0.30353783 | 0.500462263 |
| Parp9      | 8   | 2.19302434  | 1.917030177 | -0.275994163 | 0.30349756 | 0.500462263 |
| J33428I22R | 9   | 28.67164659 | 31.64038855 | 2.968741958  | 0.30347028 | 0.500462263 |
| Tbccd1     | 13  | 0.752929233 | 0.383484503 | -0.36944473  | 0.30347957 | 0.500462263 |
| Mtfr1l     | 74  | 1.811422881 | 2.013039756 | 0.201616875  | 0.30361013 | 0.500525233 |

|            |     |             |             |              |            |             |
|------------|-----|-------------|-------------|--------------|------------|-------------|
| Fuca1      | 44  | 1.319537941 | 1.397301555 | 0.077763614  | 0.30377649 | 0.500643871 |
| Axin1      | 77  | 1.276870021 | 1.297797038 | 0.020927017  | 0.30377271 | 0.500643871 |
| Ccdc12     | 22  | 1.710218715 | 1.67799404  | -0.032224674 | 0.30378445 | 0.500643871 |
| Zfp119b    | 6   | 0.616355704 | 1.003219277 | 0.386863573  | 0.30423041 | 0.501322513 |
| Dusp12     | 27  | 1.533618149 | 1.015876896 | -0.517741252 | 0.3043236  | 0.501419769 |
| Lig3       | 70  | 1.363233543 | 0.914914037 | -0.448319506 | 0.3044169  | 0.501517193 |
| Wfs1       | 54  | 1.975959841 | 1.555847658 | -0.420112184 | 0.30458709 | 0.501684916 |
| Gm5464     | 41  | 1.341546653 | 1.131541009 | -0.210005645 | 0.30458686 | 0.501684916 |
| Aasdhppt   | 64  | 1.201406729 | 1.052624652 | -0.148782077 | 0.30463412 | 0.501706075 |
| Mir1945    | 37  | 0.96794387  | 1.25349671  | 0.28555284   | 0.30477316 | 0.501742433 |
| Glb1l      | 9   | 0.575884691 | 1.146321753 | 0.570437062  | 0.30479297 | 0.501742433 |
| Otud4      | 151 | 1.096997695 | 1.066726614 | -0.030271082 | 0.30470162 | 0.501742433 |
| Sypl2      | 75  | 19.61168212 | 20.51368201 | 0.901999884  | 0.30476993 | 0.501742433 |
| Ssfa2      | 76  | 1.059528839 | 1.030842602 | -0.028686237 | 0.30491832 | 0.501892478 |
| Paqr4      | 43  | 1.635171996 | 1.470443069 | -0.164728928 | 0.30513226 | 0.502188281 |
| Rab2b      | 14  | 1.210863206 | 1.210303674 | -0.000559532 | 0.30550732 | 0.502657373 |
| Spata2     | 58  | 1.475552205 | 1.296416107 | -0.179136098 | 0.30552004 | 0.502657373 |
| Fam168a    | 10  | 1.553756693 | 2.29770519  | 0.743948497  | 0.30546727 | 0.502657373 |
| Dpysl4     | 36  | 40.5326918  | 41.22571331 | 0.693021513  | 0.30561727 | 0.502760967 |
| Iars2      | 55  | 1.34801408  | 1.523552554 | 0.175538474  | 0.30568349 | 0.502813538 |
| Ccsap      | 45  | 3.153548249 | 2.661032966 | -0.492515283 | 0.30577803 | 0.502856305 |
| Eri2       | 29  | 0.689411547 | 0.520709965 | -0.168701582 | 0.30575152 | 0.502856305 |
| Srl        | 1   | 93.76854599 | 91.82692308 | -1.941622917 | 0.30583766 | 0.502898007 |
| Rabgap1    | 41  | 1.831291046 | 2.107500101 | 0.276209055  | 0.3060793  | 0.503238958 |
| Mfn2       | 26  | 1.403702688 | 1.323350807 | -0.08035188  | 0.30621624 | 0.503359269 |
| Xpo5       | 18  | 1.940591022 | 1.672179981 | -0.268411041 | 0.30622108 | 0.503359269 |
| Camta2     | 50  | 1.22252713  | 1.420068087 | 0.197540957  | 0.3062859  | 0.503409419 |
| Dynlt1b    | 3   | 5.237376847 | 5.492426243 | 0.255049397  | 0.30641258 | 0.503561232 |
| Arhgef4    | 33  | 2.117648606 | 2.042783973 | -0.074864633 | 0.30649449 | 0.503607242 |
| !30319C09F | 23  | 3.052409628 | 2.380584105 | -0.671825522 | 0.30651255 | 0.503607242 |
| Arl4d      | 29  | 1.424984002 | 1.481250947 | 0.056266945  | 0.30654354 | 0.503607242 |
| Mir2861    | 9   | 1.668989471 | 1.770851771 | 0.1018623    | 0.3067957  | 0.503908681 |
| Mfsd7b     | 51  | 1.251377752 | 1.140179102 | -0.111198649 | 0.30676937 | 0.503908681 |
| Top3b      | 46  | 1.67554707  | 1.650859889 | -0.024687182 | 0.30689921 | 0.504022269 |

|            |    |             |             |              |            |             |
|------------|----|-------------|-------------|--------------|------------|-------------|
| Rhobtb2    | 26 | 0.99240969  | 1.324663172 | 0.332253482  | 0.30710821 | 0.504309079 |
| Cyc1       | 54 | 1.385156128 | 1.312456925 | -0.072699203 | 0.3071748  | 0.504361986 |
| Eva1a      | 21 | 4.112148685 | 3.927391065 | -0.18475762  | 0.30749753 | 0.504835398 |
| Tuba1b     | 33 | 0.675142488 | 0.9280622   | 0.252919713  | 0.30784874 | 0.505355459 |
| Erich2     | 25 | 2.904537819 | 2.83135963  | -0.073178189 | 0.30789375 | 0.505372802 |
| Rab11fip3  | 53 | 1.318534225 | 1.050093568 | -0.268440657 | 0.30795269 | 0.50541301  |
| Dhdds      | 3  | 2.693602694 | 2.322824273 | -0.37077842  | 0.30811363 | 0.5056206   |
| Gins1      | 13 | 1.232543013 | 1.054417313 | -0.1781257   | 0.30815239 | 0.505627658 |
| Mrpl20     | 11 | 0.652991383 | 1.209971245 | 0.556979862  | 0.30819135 | 0.505635056 |
| Taf1a      | 7  | 3.5734891   | 2.47107987  | -1.10240923  | 0.30825335 | 0.505668849 |
| i30013K17F | 10 | 96.79710944 | 96.15860302 | -0.638506422 | 0.30828087 | 0.505668849 |
| Enc1       | 79 | 1.144244966 | 1.066143441 | -0.078101526 | 0.30831691 | 0.505671429 |
| Ncoa4      | 13 | 2.137849639 | 2.636726437 | 0.498876797  | 0.30844498 | 0.505824947 |
| Fam185a    | 23 | 1.101104552 | 1.214898927 | 0.113794375  | 0.308486   | 0.505835692 |
| Ept1       | 35 | 1.422945089 | 1.78200869  | 0.359063601  | 0.30857708 | 0.505928502 |
| Epb4.1l5   | 59 | 1.303004843 | 1.135251864 | -0.167752979 | 0.3087233  | 0.506111678 |
| Hsf1       | 66 | 1.270044486 | 1.417800009 | 0.147755523  | 0.30883587 | 0.506239681 |
| Usp16      | 63 | 1.254954487 | 1.398519721 | 0.143565233  | 0.30887992 | 0.506255328 |
| Gpatch2    | 42 | 1.481891144 | 1.177632981 | -0.304258163 | 0.30908251 | 0.506515026 |
| Trpc4ap    | 46 | 1.576784243 | 1.517689658 | -0.059094585 | 0.30910741 | 0.506515026 |
| Klhdc3     | 20 | 1.47301293  | 1.555257267 | 0.082244337  | 0.30919629 | 0.506604105 |
| Rnf103     | 51 | 0.922847152 | 0.929786835 | 0.006939683  | 0.30923296 | 0.506607627 |
| Bap1       | 27 | 0.900707554 | 1.048251455 | 0.147543901  | 0.30939314 | 0.506756878 |
| Cpsf1      | 39 | 1.366643159 | 1.111506954 | -0.255136205 | 0.30938482 | 0.506756878 |
| Mmgt2      | 61 | 1.924149255 | 1.670671639 | -0.253477617 | 0.30944453 | 0.506784496 |
| Nfyb       | 78 | 1.032440762 | 0.898854882 | -0.13358588  | 0.30954796 | 0.506897299 |
| Sulf1      | 6  | 18.56263205 | 14.00246597 | -4.560166082 | 0.30961796 | 0.50695536  |
| Crebrf     | 59 | 0.772658899 | 0.82353482  | 0.05087592   | 0.30980296 | 0.507201674 |
| Gtf2h1     | 68 | 1.335693967 | 1.036777342 | -0.298916625 | 0.30988385 | 0.507277517 |
| Foxj2      | 90 | 1.54425921  | 1.534854162 | -0.009405049 | 0.30993436 | 0.507303598 |
| Ankrd35    | 1  | 98.15668203 | 99.14285714 | 0.986175115  | 0.30998505 | 0.507329978 |
| Zfp609     | 87 | 1.725803373 | 1.736780654 | 0.01097728   | 0.3100221  | 0.507334033 |
| Tmem50a    | 52 | 1.809649505 | 1.492726444 | -0.31692306  | 0.31011196 | 0.507424495 |
| '00049A03F | 5  | 1.471491228 | 0.612244898 | -0.85924633  | 0.31016028 | 0.507446983 |



|         |    |             |             |              |            |             |
|---------|----|-------------|-------------|--------------|------------|-------------|
| Mir7032 | 1  | 97.17514124 | 98.62385321 | 1.448711968  | 0.31024571 | 0.507482389 |
| Nptn    | 41 | 1.409995188 | 1.730403354 | 0.320408166  | 0.31025109 | 0.507482389 |
| Dscc1   | 35 | 1.615319027 | 1.608176096 | -0.007142932 | 0.31034996 | 0.507587527 |
| Prkar2b | 75 | 1.407850753 | 1.253847116 | -0.154003637 | 0.31050472 | 0.507727465 |
| Ctnnal1 | 53 | 1.064757666 | 1.179645802 | 0.114888137  | 0.31047799 | 0.507727465 |
| Gm20324 | 58 | 1.499027067 | 1.256666366 | -0.242360701 | 0.31060042 | 0.507827358 |
| Mtg2    | 42 | 1.46518509  | 1.291626439 | -0.173558651 | 0.31077399 | 0.508054531 |
| Smim15  | 35 | 1.279286584 | 1.141755197 | -0.137531388 | 0.31090182 | 0.508206891 |
| Ptpn21  | 39 | 1.366444605 | 1.127158801 | -0.239285804 | 0.31101512 | 0.508335477 |
| Hpcal1  | 43 | 1.606438622 | 1.568638813 | -0.03779981  | 0.31119701 | 0.508576115 |
| Qser1   | 70 | 1.388275612 | 1.533479063 | 0.145203451  | 0.31127104 | 0.508640453 |
| Add3    | 37 | 1.12148375  | 1.06127617  | -0.060207581 | 0.31145578 | 0.508828997 |
| Ltv1    | 25 | 1.789779853 | 1.464001919 | -0.325777934 | 0.31144796 | 0.508828997 |
| Ccdc22  | 7  | 18.85165442 | 16.95619858 | -1.895455838 | 0.31151659 | 0.508871701 |
| Sdc4    | 33 | 1.780466726 | 1.776811744 | -0.003654982 | 0.31155856 | 0.508883607 |
| Sez6l2  | 16 | 6.340615868 | 6.08026274  | -0.260353128 | 0.31181519 | 0.509246083 |
| Ginm1   | 44 | 5.469810156 | 5.214523068 | -0.255287088 | 0.31185934 | 0.509261518 |
| Tmbim4  | 20 | 1.360135375 | 1.305735075 | -0.0544003   | 0.31201144 | 0.509453194 |
| Azi2    | 41 | 2.066519021 | 1.753557899 | -0.312961122 | 0.31226896 | 0.509760232 |
| Dohh    | 8  | 0.847005469 | 0.885775335 | 0.038769866  | 0.31224147 | 0.509760232 |
| Akt2    | 11 | 0.942449045 | 1.063193857 | 0.120744811  | 0.31233616 | 0.509813209 |
| Itga1   | 23 | 2.53137914  | 2.372949191 | -0.158429949 | 0.31237619 | 0.50982169  |
| Rbck1   | 27 | 1.521978093 | 1.659420863 | 0.13744277   | 0.31244558 | 0.50982169  |
| Ghsr    | 14 | 25.62850794 | 27.00717346 | 1.378665525  | 0.31241554 | 0.50982169  |
| Zdhhc16 | 34 | 1.5194425   | 1.562579438 | 0.043136937  | 0.31272115 | 0.510165141 |
| Kif17   | 82 | 1.707973237 | 1.138969798 | -0.569003438 | 0.3127256  | 0.510165141 |
| Rpl24   | 30 | 1.537553357 | 1.499030701 | -0.038522656 | 0.31277371 | 0.510186901 |
| Rnf11   | 94 | 1.249815645 | 1.323289265 | 0.07347362   | 0.31291094 | 0.510354025 |
| Slc35f6 | 20 | 2.594033655 | 2.175069929 | -0.418963726 | 0.31300465 | 0.510450132 |
| Hps1    | 28 | 1.36392564  | 1.352407754 | -0.011517885 | 0.31310599 | 0.51055865  |
| Mtus2   | 88 | 4.13891719  | 5.092042287 | 0.953125097  | 0.31321389 | 0.510677851 |
| Esd     | 4  | 1.684782609 | 0.531914894 | -1.152867715 | 0.31325294 | 0.510684773 |
| Atp1b3  | 94 | 8.112370319 | 8.43519272  | 0.322822401  | 0.31341284 | 0.510888687 |
| Zfp108  | 5  | 12.47944314 | 11.39707478 | -1.082368359 | 0.31348438 | 0.510948549 |

|            |     |             |             |              |            |             |
|------------|-----|-------------|-------------|--------------|------------|-------------|
| Rnf113a2   | 10  | 5.646790191 | 4.652011287 | -0.994778904 | 0.31370147 | 0.511245594 |
| Phtf1      | 13  | 0.957019819 | 0.790983534 | -0.166036285 | 0.31395968 | 0.511609596 |
| Ube2w      | 89  | 5.138155047 | 4.455428955 | -0.682726092 | 0.31404289 | 0.511688363 |
| Ptpn3      | 31  | 2.388590021 | 1.773799744 | -0.614790277 | 0.31409921 | 0.511723302 |
| Guk1       | 18  | 1.518738594 | 1.099505475 | -0.419233119 | 0.31418706 | 0.511809598 |
| Slc35a5    | 11  | 0.5021886   | 1.200907166 | 0.698718567  | 0.31473586 | 0.512646695 |
| Acad9      | 26  | 1.073319409 | 1.027020068 | -0.046299341 | 0.31490359 | 0.512862956 |
| Gstt3      | 10  | 6.599186544 | 7.576065396 | 0.976878852  | 0.31498245 | 0.512922445 |
| Psma3      | 41  | 2.030856181 | 1.753125437 | -0.277730744 | 0.31501002 | 0.512922445 |
| Vps13a     | 99  | 1.283239862 | 1.20362065  | -0.079619212 | 0.31523302 | 0.513228599 |
| 130523C07F | 13  | 43.10248588 | 43.9140087  | 0.811522818  | 0.31550923 | 0.513621307 |
| Gigyf2     | 54  | 1.240537318 | 1.221683871 | -0.018853448 | 0.31566451 | 0.513817084 |
| Sf3a1      | 35  | 1.352772113 | 1.677912206 | 0.325140093  | 0.3159041  | 0.514150043 |
| Smg6       | 21  | 1.573471999 | 1.065052307 | -0.508419693 | 0.31599117 | 0.514234713 |
| Sumo2      | 96  | 1.039923737 | 1.036776242 | -0.003147495 | 0.31609534 | 0.514290162 |
| Nol6       | 19  | 1.249880706 | 1.667952384 | 0.418071678  | 0.31607117 | 0.514290162 |
| Ciapi1     | 39  | 0.818808808 | 0.988812736 | 0.170003928  | 0.31615134 | 0.51432425  |
| Ube2d2a    | 45  | 1.748298721 | 1.649131686 | -0.099167035 | 0.31623782 | 0.514350892 |
| Ubt1       | 116 | 1.500647121 | 1.461747398 | -0.038899723 | 0.31620838 | 0.514350892 |
| Casc3      | 40  | 1.706563428 | 1.307493788 | -0.39906964  | 0.3165763  | 0.514844364 |
| Sp3os      | 18  | 1.526499127 | 1.494545471 | -0.031953656 | 0.31671643 | 0.515015164 |
| Hnrnp1     | 63  | 1.130652627 | 1.27234123  | 0.141688603  | 0.31682459 | 0.515133971 |
| Cebpg      | 79  | 1.350623946 | 0.995008149 | -0.355615797 | 0.31689781 | 0.515195931 |
| Lcmt1      | 8   | 1.211056745 | 1.184712307 | -0.026344438 | 0.31694906 | 0.515222164 |
| Mir1893    | 37  | 0.706489413 | 0.94568963  | 0.239200217  | 0.31715927 | 0.515506771 |
| Rasgrp2    | 32  | 2.696051937 | 2.789264368 | 0.093212431  | 0.31737613 | 0.515687893 |
| Notch2     | 62  | 1.288141882 | 0.978035228 | -0.310106654 | 0.31736065 | 0.515687893 |
| Copz1      | 6   | 3.169480197 | 2.423428711 | -0.746051485 | 0.31730732 | 0.515687893 |
| Bbip1      | 8   | 0.977215329 | 1.169400441 | 0.192185112  | 0.31742329 | 0.515707406 |
| Txndc11    | 76  | 1.124563919 | 1.161043108 | 0.036479189  | 0.31746615 | 0.515719951 |
| Marf1      | 27  | 1.438415657 | 1.511852988 | 0.073437331  | 0.31769642 | 0.516036887 |
| 333430I17R | 7   | 1.117608582 | 0.716553288 | -0.401055294 | 0.31778896 | 0.516130075 |
| Chat       | 6   | 13.10575934 | 14.78381053 | 1.678051198  | 0.31795185 | 0.516337475 |
| Lamc1      | 119 | 1.386339017 | 1.468731524 | 0.082392507  | 0.318167   | 0.516629688 |

|           |     |             |             |              |            |             |
|-----------|-----|-------------|-------------|--------------|------------|-------------|
| Rab3a     | 27  | 2.600476252 | 2.446040922 | -0.15443533  | 0.31840792 | 0.516802335 |
| Slc35f4   | 19  | 40.43434319 | 40.35406327 | -0.080279916 | 0.31840228 | 0.516802335 |
| Epn2      | 72  | 1.930633558 | 1.673410851 | -0.257222707 | 0.3184142  | 0.516802335 |
| Ccdc137   | 19  | 1.173155658 | 1.002953559 | -0.1702021   | 0.31831392 | 0.516802335 |
| Spata33   | 15  | 1.82105431  | 1.916908705 | 0.095854395  | 0.31862947 | 0.517094534 |
| BC003331  | 63  | 1.241697918 | 1.201692687 | -0.04000523  | 0.31867427 | 0.517110062 |
| Cdk4      | 9   | 1.86439815  | 1.690168897 | -0.174229253 | 0.31883737 | 0.517317517 |
| Cyfp1     | 31  | 1.403856701 | 1.300305136 | -0.103551565 | 0.31901582 | 0.517492605 |
| Ppp1r15a  | 13  | 1.462902993 | 0.775799477 | -0.687103516 | 0.31898884 | 0.517492605 |
| Polr3h    | 58  | 1.923946845 | 1.473008084 | -0.450938761 | 0.31914183 | 0.517638449 |
| Parp4     | 23  | 1.605521129 | 1.325579705 | -0.279941424 | 0.31917628 | 0.517638449 |
| Lztr1     | 46  | 1.19811574  | 1.023220578 | -0.174895162 | 0.3196239  | 0.518307111 |
| Ift88     | 42  | 1.620279317 | 1.158269875 | -0.462009442 | 0.31970454 | 0.518380596 |
| Gpsm2     | 40  | 1.231370847 | 0.968294359 | -0.263076488 | 0.31982759 | 0.518522817 |
| Tnrc6c    | 54  | 0.876648736 | 0.780475648 | -0.096173088 | 0.31988253 | 0.518554603 |
| Zfp263    | 33  | 1.38303463  | 1.323443065 | -0.059591565 | 0.32011105 | 0.51886773  |
| Brwd1     | 132 | 1.571454147 | 1.443104632 | -0.128349515 | 0.32025758 | 0.518942677 |
| Kcng4     | 2   | 6.259390241 | 5.063321103 | -1.196069138 | 0.32021522 | 0.518942677 |
| Mid2      | 3   | 95.35834536 | 96.24380039 | 0.885455032  | 0.32026338 | 0.518942677 |
| Tdp2      | 77  | 1.257804379 | 1.096991329 | -0.160813051 | 0.32042078 | 0.519083079 |
| B3gnt4    | 3   | 93.88150559 | 92.62827804 | -1.25322755  | 0.32039466 | 0.519083079 |
| Ddias     | 46  | 1.6054184   | 1.723656319 | 0.118237919  | 0.32058216 | 0.519251737 |
| Mtx1      | 58  | 1.179520149 | 1.131530333 | -0.047989816 | 0.32063105 | 0.519251737 |
| Mtpap     | 11  | 1.168183612 | 1.372601428 | 0.204417815  | 0.32062439 | 0.519251737 |
| Yipf2     | 63  | 1.33729451  | 0.992744408 | -0.344550103 | 0.32080414 | 0.519474729 |
| Dad1      | 33  | 1.371062414 | 1.096139874 | -0.27492254  | 0.32088984 | 0.519498844 |
| Ecsit     | 29  | 1.264189954 | 1.832366164 | 0.568176211  | 0.32087483 | 0.519498844 |
| Pddc1     | 20  | 2.54777657  | 2.138363919 | -0.409412652 | 0.32099502 | 0.519611791 |
| Plekhg4   | 47  | 82.48487051 | 82.2718979  | -0.212972608 | 0.32112953 | 0.519772197 |
| Pdgfa     | 143 | 1.463818287 | 1.281327346 | -0.182490941 | 0.3212915  | 0.519976995 |
| Tnfrsf11a | 70  | 4.791269129 | 4.656650496 | -0.134618633 | 0.32133997 | 0.5199981   |
| Aptx      | 28  | 1.433722615 | 1.089916105 | -0.34380651  | 0.32148397 | 0.520173749 |
| Kpna6     | 17  | 2.024378787 | 2.072947293 | 0.048568506  | 0.32152008 | 0.520174825 |
| Mphosph9  | 55  | 1.289190145 | 1.577985766 | 0.288795621  | 0.3217849  | 0.52043112  |

|           |     |             |             |              |            |             |
|-----------|-----|-------------|-------------|--------------|------------|-------------|
| Rnf139    | 59  | 0.98763499  | 1.121675592 | 0.134040602  | 0.32173015 | 0.52043112  |
| Trnp1     | 34  | 3.95614272  | 5.410123309 | 1.453980589  | 0.32174963 | 0.52043112  |
| Asphd1    | 13  | 4.09394384  | 5.589322259 | 1.49537842   | 0.3223356  | 0.5212069   |
| Sdhc      | 16  | 1.801310695 | 1.151290679 | -0.650020016 | 0.32230345 | 0.5212069   |
| Hsd17b11  | 11  | 1.171949513 | 1.791377331 | 0.619427818  | 0.32238374 | 0.521227307 |
| Gm2109    | 4   | 4.420666572 | 4.466945996 | 0.046279425  | 0.32243316 | 0.521244172 |
| Pxmp4     | 21  | 2.17198775  | 2.336472967 | 0.164485217  | 0.32246522 | 0.521244172 |
| Egr2      | 28  | 1.646369938 | 2.067115423 | 0.420745485  | 0.32264546 | 0.521420647 |
| Ncor1     | 59  | 1.175857525 | 1.092933319 | -0.082924206 | 0.32262962 | 0.521420647 |
| Cdk11b    | 37  | 1.039529309 | 1.144183342 | 0.104654032  | 0.32279896 | 0.521611274 |
| Klf16     | 150 | 1.494022186 | 1.325427867 | -0.168594318 | 0.32286052 | 0.521653307 |
| Hectd2    | 92  | 1.865681367 | 1.609039085 | -0.256642282 | 0.32296899 | 0.521771106 |
| Ubn1      | 78  | 1.112260047 | 1.288066293 | 0.175806246  | 0.32332343 | 0.522056339 |
| 30032B11F | 1   | 45.45454545 | 49.41176471 | 3.957219251  | 0.32325967 | 0.522056339 |
| Mir22     | 6   | 3.132235383 | 2.085927692 | -1.046307691 | 0.32330056 | 0.522056339 |
| Osbpl2    | 69  | 1.056784007 | 1.095432831 | 0.038648823  | 0.32319241 | 0.522056339 |
| Npepps    | 69  | 1.417693132 | 1.430638739 | 0.012945607  | 0.32332215 | 0.522056339 |
| Cadm4     | 83  | 2.511423362 | 2.28309164  | -0.228331722 | 0.32336479 | 0.522065679 |
| Smtn      | 11  | 2.85647847  | 2.349561526 | -0.506916944 | 0.32340808 | 0.522078127 |
| Zmynd19   | 98  | 1.373077217 | 1.520304848 | 0.147227631  | 0.3234493  | 0.52208723  |
| Gtpbp10   | 10  | 1.522939994 | 1.193148442 | -0.329791552 | 0.32356431 | 0.522215425 |
| Rassf1    | 39  | 1.23559163  | 1.514857462 | 0.279265832  | 0.32365419 | 0.522303051 |
| Tma7      | 13  | 1.493523142 | 1.491484136 | -0.002039006 | 0.32375264 | 0.522404463 |
| Npepl1    | 61  | 1.5630696   | 1.614621414 | 0.051551814  | 0.3240984  | 0.522904882 |
| Rrp7a     | 23  | 0.813281849 | 0.760259571 | -0.053022278 | 0.32429916 | 0.523093557 |
| Pms2      | 17  | 0.937332244 | 1.430362362 | 0.493030118  | 0.32432228 | 0.523093557 |
| Taf1d     | 26  | 0.555608898 | 0.79644806  | 0.240839162  | 0.32425748 | 0.523093557 |
| Coa4      | 9   | 0.740740741 | 0.820589013 | 0.079848272  | 0.32501121 | 0.524121354 |
| Mzf1      | 2   | 3.539823009 | 1.655629139 | -1.88419387  | 0.32506535 | 0.524121354 |
| Rbac1     | 1   | 4.545454545 | 2.272727273 | -2.272727273 | 0.32506668 | 0.524121354 |
| 31440J10R | 76  | 1.526805888 | 1.187751643 | -0.339054245 | 0.32517467 | 0.524198137 |
| BC017158  | 21  | 1.114397776 | 1.143918761 | 0.029520985  | 0.32518575 | 0.524198137 |
| Muc1      | 1   | 3.076923077 | 1.470588235 | -1.606334842 | 0.32537522 | 0.524423079 |
| Ppp1r2    | 29  | 17.17437779 | 16.3475169  | -0.826860884 | 0.32539677 | 0.524423079 |

|            |    |              |             |              |            |             |
|------------|----|--------------|-------------|--------------|------------|-------------|
| Galnt10    | 46 | 1.447856484  | 1.291628494 | -0.15622799  | 0.32553205 | 0.524525885 |
| Ankrd39    | 26 | 1.44018782   | 1.940076067 | 0.499888247  | 0.3255297  | 0.524525885 |
| Zc3hav1l   | 12 | 2.683830955  | 2.623010819 | -0.060820136 | 0.32558024 | 0.524545945 |
| Chaf1b     | 51 | 1.390576123  | 1.145719678 | -0.244856445 | 0.32574865 | 0.524586885 |
| Tyw3       | 37 | 1.798003666  | 1.544090092 | -0.253913573 | 0.32565391 | 0.524586885 |
| Alg10b     | 3  | 0.247831475  | 0           | -0.247831475 | 0.32572227 | 0.524586885 |
| Zak        | 72 | 1.318888961  | 1.354965185 | 0.036076224  | 0.325738   | 0.524586885 |
| Crtc2      | 53 | 1.264507942  | 1.430138585 | 0.165630643  | 0.32611528 | 0.52511968  |
| Zmynd8     | 9  | 30.23497142  | 32.68175762 | 2.446786198  | 0.32642611 | 0.525370821 |
| Glt1d1     | 16 | 13.39242336  | 11.90156793 | -1.490855432 | 0.32660862 | 0.525370821 |
| Gnb4       | 66 | 1.275259505  | 1.299855743 | 0.024596239  | 0.32645367 | 0.525370821 |
| Hspa2      | 38 | 2.367582025  | 2.461291972 | 0.093709948  | 0.32649455 | 0.525370821 |
| Ghrh       | 3  | 91.93121693  | 90.47904122 | -1.452175708 | 0.32656037 | 0.525370821 |
| Ttc5       | 3  | 1.877934272  | 1.62601626  | -0.251918012 | 0.32642052 | 0.525370821 |
| Irf4       | 12 | 17.8437115   | 17.57637627 | -0.267335229 | 0.32662928 | 0.525370821 |
| Bag3       | 31 | 1.508276832  | 1.281609645 | -0.226667187 | 0.32655869 | 0.525370821 |
| 310058I24R | 17 | 1.289768428  | 1.184339917 | -0.105428511 | 0.32636071 | 0.525370821 |
| Echs1      | 6  | 2.050776465  | 2.733585198 | 0.682808733  | 0.32661935 | 0.525370821 |
| Shroom3    | 86 | 5.027821569  | 5.673582067 | 0.645760499  | 0.32686531 | 0.525462484 |
| Cmas       | 60 | 1.769212869  | 1.619772753 | -0.149440116 | 0.3268164  | 0.525462484 |
| Cdkl3      | 27 | 2.776708081  | 2.456820003 | -0.319888078 | 0.32676816 | 0.525462484 |
| Vti1a      | 31 | 1.271570962  | 1.692967788 | 0.421396826  | 0.32678429 | 0.525462484 |
| i10206C17F | 70 | 1.435897989  | 1.070389001 | -0.365508988 | 0.32684729 | 0.525462484 |
| Spg21      | 17 | 0.783658731  | 1.217183432 | 0.4335247    | 0.32707719 | 0.525687912 |
| Inafm1     | 16 | 3.254487184  | 2.632960914 | -0.62152627  | 0.32704561 | 0.525687912 |
| Khdrbs2    | 48 | 49.59212061  | 50.67694799 | 1.084827382  | 0.32714725 | 0.525729334 |
| Myc        | 42 | 1.162674374  | 1.350819733 | 0.18814536   | 0.32717461 | 0.525729334 |
| Wdr25      | 11 | 1.303514866  | 1.378139493 | 0.074624628  | 0.3272904  | 0.525742677 |
| Tcl1b1     | 1  | 23.611111111 | 18.5840708  | -5.027040315 | 0.32727081 | 0.525742677 |
| Rps6ka5    | 13 | 8.403648055  | 8.755500775 | 0.35185272   | 0.32725178 | 0.525742677 |
| Polr2a     | 59 | 1.627258478  | 1.433052264 | -0.194206214 | 0.32749886 | 0.526019946 |
| Aatf       | 72 | 1.21709796   | 1.273055494 | 0.055957534  | 0.32761962 | 0.526156325 |
| Clcf1      | 33 | 1.808249525  | 1.281900447 | -0.526349078 | 0.32775864 | 0.526307755 |
| Cenpm      | 39 | 1.120088385  | 1.133120573 | 0.013032187  | 0.32778565 | 0.526307755 |

|            |     |             |             |              |            |             |
|------------|-----|-------------|-------------|--------------|------------|-------------|
| Srsf7      | 42  | 1.210193387 | 0.986048156 | -0.224145231 | 0.32785627 | 0.526363549 |
| Mir1938    | 62  | 1.197741391 | 1.099741746 | -0.097999645 | 0.32809088 | 0.526682599 |
| Stx18      | 37  | 1.597245562 | 1.403607999 | -0.193637563 | 0.3282746  | 0.526689417 |
| 30578M01f  | 3   | 4.686158587 | 4.350067412 | -0.336091174 | 0.32817633 | 0.526689417 |
| Exd1       | 20  | 1.777912925 | 1.433933852 | -0.343979073 | 0.32824126 | 0.526689417 |
| Mtor       | 49  | 1.476160164 | 1.136463966 | -0.339696198 | 0.32820306 | 0.526689417 |
| Snx29      | 64  | 2.880147528 | 2.560484874 | -0.319662654 | 0.32824041 | 0.526689417 |
| Exosc4     | 32  | 1.232667126 | 0.921201293 | -0.311465833 | 0.32835672 | 0.526759071 |
| Impa1      | 37  | 1.450440636 | 1.303567023 | -0.146873613 | 0.3283898  | 0.526759071 |
| '00110K17F | 10  | 88.81701134 | 89.54302782 | 0.726016482  | 0.32852105 | 0.526912001 |
| 110016O06F | 111 | 1.010636606 | 1.049565764 | 0.038929158  | 0.32868702 | 0.52712058  |
| Pias2      | 69  | 1.129083578 | 1.23717141  | 0.108087832  | 0.32883675 | 0.527169465 |
| Dnaaf1     | 26  | 1.101632916 | 1.089694481 | -0.011938435 | 0.32885531 | 0.527169465 |
| Cd320      | 3   | 2.732822733 | 3.643844943 | 0.91102221   | 0.32881702 | 0.527169465 |
| AU022252   | 12  | 2.28947511  | 1.663422839 | -0.626052271 | 0.3288612  | 0.527169465 |
| 110020C07F | 8   | 1.445676542 | 0.726310073 | -0.719366469 | 0.32894433 | 0.527245118 |
| Cam1       | 17  | 1.435335915 | 0.997040145 | -0.43829577  | 0.32908097 | 0.52740653  |
| Tmem131    | 159 | 1.112065848 | 1.112934121 | 0.000868272  | 0.32921237 | 0.527559498 |
| Pibf1      | 58  | 1.401933994 | 1.173606441 | -0.228327553 | 0.32925788 | 0.527574809 |
| Tor3a      | 28  | 1.293836681 | 1.515020261 | 0.22118358   | 0.32942957 | 0.52773467  |
| Nprl3      | 33  | 1.139395525 | 1.122212105 | -0.01718342  | 0.32942017 | 0.52773467  |
| Sh3bgrl2   | 7   | 8.823490237 | 7.985695143 | -0.837795094 | 0.3295527  | 0.527874292 |
| 110433D01F | 6   | 53.73763735 | 54.74512811 | 1.007490757  | 0.32961237 | 0.52791224  |
| Trnt1      | 11  | 1.096441786 | 0.811859734 | -0.284582052 | 0.32976659 | 0.528098373 |
| Psmg3      | 6   | 0.560263653 | 0.955228763 | 0.39496511   | 0.32980057 | 0.528098373 |
| Map7d1     | 69  | 1.225200005 | 1.129140097 | -0.096059908 | 0.32992805 | 0.528244873 |
| Eif3d      | 58  | 1.120945751 | 1.275280552 | 0.154334801  | 0.33001471 | 0.528325979 |
| Dcaf8      | 42  | 1.196447378 | 0.754886742 | -0.441560636 | 0.33015351 | 0.528490523 |
| Cerk       | 38  | 1.331695215 | 1.759585606 | 0.427890391  | 0.33025628 | 0.528597374 |
| 130306N03F | 4   | 97.45762712 | 93.75       | -3.707627119 | 0.33052254 | 0.528965829 |
| 10018M11f  | 47  | 1.047306016 | 1.142759197 | 0.095453181  | 0.33065974 | 0.529070003 |
| Gm1673     | 57  | 11.73633381 | 13.79334403 | 2.057010219  | 0.33062468 | 0.529070003 |
| Tmed10     | 14  | 0.336134454 | 0.833802693 | 0.497668239  | 0.33093789 | 0.529457323 |
| Kif1bp     | 45  | 1.323938345 | 1.093287901 | -0.230650444 | 0.33103477 | 0.529496859 |

|            |     |             |             |              |            |             |
|------------|-----|-------------|-------------|--------------|------------|-------------|
| Gm10814    | 2   | 98.36984872 | 97.00892857 | -1.360920151 | 0.33102643 | 0.529496859 |
| Fam167b    | 3   | 66.25747021 | 64.16673245 | -2.09073776  | 0.33108171 | 0.529514227 |
| Col1a1     | 1   | 93.75       | 89.36170213 | -4.388297872 | 0.33115713 | 0.529577126 |
| Napa       | 38  | 1.140302593 | 1.286848111 | 0.146545519  | 0.33126331 | 0.529645838 |
| BC003965   | 76  | 1.149369956 | 1.217781833 | 0.068411877  | 0.33127228 | 0.529645838 |
| Zfp472     | 13  | 2.081832481 | 1.611134383 | -0.470698098 | 0.3313614  | 0.529701038 |
| Mob3b      | 18  | 1.169460095 | 0.888266272 | -0.281193823 | 0.33137901 | 0.529701038 |
| Baz2a      | 43  | 1.526447551 | 1.675961032 | 0.149513481  | 0.33148528 | 0.529813206 |
| Eif4g1     | 71  | 1.497336719 | 1.518170243 | 0.020833524  | 0.33176334 | 0.530199871 |
| Elfn1      | 28  | 16.35403239 | 15.85996173 | -0.494070661 | 0.33196545 | 0.530465106 |
| Zfp747     | 14  | 1.764332431 | 1.62970079  | -0.134631642 | 0.33225848 | 0.53087554  |
| Fam214b    | 25  | 2.231361122 | 2.437571282 | 0.20621016   | 0.33275982 | 0.531618688 |
| Sdhaf4     | 10  | 0.744305079 | 1.194561022 | 0.450255943  | 0.33279736 | 0.531620773 |
| Acvr1      | 128 | 1.49658911  | 1.33861853  | -0.15797058  | 0.33300151 | 0.531888997 |
| Vat1       | 66  | 1.640568725 | 1.51493817  | -0.125630555 | 0.33310391 | 0.531967532 |
| Gtf2h5     | 11  | 0.496770989 | 0.162337662 | -0.334433326 | 0.33312319 | 0.531967532 |
| Cyb5a      | 15  | 1.759142713 | 1.487060775 | -0.272081939 | 0.33322084 | 0.532065565 |
| Med29      | 15  | 0.50925592  | 1.56824283  | 1.05898691   | 0.33330816 | 0.532147091 |
| Txn14b     | 25  | 0.793747627 | 0.999625827 | 0.2058782    | 0.33352426 | 0.53243418  |
| Tcp11l2    | 29  | 1.817657476 | 1.80758963  | -0.010067847 | 0.33364713 | 0.532538173 |
| Tcea1      | 45  | 1.563544005 | 1.289260088 | -0.274283917 | 0.33366198 | 0.532538173 |
| Rnaseh2a   | 10  | 2.555215485 | 3.533333333 | 0.978117848  | 0.33369946 | 0.532540058 |
| Hps6       | 31  | 1.641690376 | 1.376489811 | -0.265200565 | 0.33383249 | 0.532694423 |
| Fam71e1    | 32  | 2.105212831 | 1.839559233 | -0.265653598 | 0.3338724  | 0.532700189 |
| Gm2518     | 65  | 1.125829754 | 0.930135929 | -0.195693825 | 0.33408821 | 0.532986562 |
| Zhx3       | 100 | 1.249346773 | 1.407926451 | 0.158579679  | 0.33415893 | 0.533041435 |
| Ahsa2      | 54  | 1.789646672 | 1.365982697 | -0.423663976 | 0.33421238 | 0.533068749 |
| Nhlrc1     | 13  | 42.62753552 | 44.35188998 | 1.724354461  | 0.33425626 | 0.533080797 |
| h30579K19F | 14  | 1.529949162 | 1.365216849 | -0.164732313 | 0.33435926 | 0.533187105 |
| Mir7062    | 14  | 95.11051766 | 94.42960494 | -0.680912727 | 0.33454978 | 0.533432948 |
| Cnep1r1    | 16  | 1.292855916 | 1.202967756 | -0.08988816  | 0.33459492 | 0.533446967 |
| Samd10     | 33  | 1.549830612 | 1.109976362 | -0.43985425  | 0.33487642 | 0.533721802 |
| Cenpk      | 39  | 1.376317424 | 1.037778876 | -0.338538549 | 0.33481483 | 0.533721802 |
| Tlr3       | 7   | 0.767018217 | 0.976958525 | 0.209940309  | 0.33486871 | 0.533721802 |

|           |     |             |             |              |            |             |
|-----------|-----|-------------|-------------|--------------|------------|-------------|
| Pccb      | 24  | 0.949120148 | 0.987589636 | 0.038469488  | 0.33500774 | 0.533840151 |
| 10026B05F | 105 | 1.041233953 | 0.886484337 | -0.154749616 | 0.33502344 | 0.533840151 |
| Mta1      | 116 | 1.433729474 | 1.539295328 | 0.105565854  | 0.33510407 | 0.53391065  |
| Zfp661    | 11  | 4.12630866  | 5.078947224 | 0.952638564  | 0.3353409  | 0.534114003 |
| Hps5      | 36  | 1.414796056 | 1.04865635  | -0.366139706 | 0.33527205 | 0.534114003 |
| Atp5s     | 22  | 1.339721723 | 1.006188031 | -0.333533692 | 0.33533166 | 0.534114003 |
| Ablim1    | 35  | 6.703163899 | 5.920668563 | -0.782495337 | 0.33554243 | 0.534319008 |
| Smarcd2   | 61  | 1.108974486 | 1.210302847 | 0.101328361  | 0.33553154 | 0.534319008 |
| Asmt      | 8   | 98.84848215 | 99.24667986 | 0.398197704  | 0.33568171 | 0.534482788 |
| Man1a2    | 134 | 1.159997179 | 1.083993459 | -0.076003719 | 0.33598446 | 0.534674757 |
| Fnip1     | 16  | 0.45329036  | 1.093318296 | 0.640027937  | 0.33592957 | 0.534674757 |
| Ctcf      | 129 | 1.070847196 | 1.121300338 | 0.050453142  | 0.33594902 | 0.534674757 |
| Abhd15    | 74  | 2.3023711   | 2.20611242  | -0.096258679 | 0.33594482 | 0.534674757 |
| Nob1      | 40  | 1.19256457  | 1.053263621 | -0.139300949 | 0.33597673 | 0.534674757 |
| Exosc2    | 9   | 1.145044381 | 0.87338394  | -0.271660441 | 0.33631853 | 0.535103974 |
| Cops7b    | 5   | 2.163781563 | 2.174779113 | 0.01099755   | 0.33644747 | 0.535103974 |
| Tmtc4     | 51  | 1.440624275 | 1.105489227 | -0.335135047 | 0.33647297 | 0.535103974 |
| Slc9a7    | 36  | 24.96146615 | 24.16709274 | -0.794373414 | 0.33638839 | 0.535103974 |
| Pak1ip1   | 38  | 1.240162781 | 1.42383451  | 0.183671729  | 0.33640781 | 0.535103974 |
| Mrpl10    | 8   | 0.533853545 | 0.881702753 | 0.347849208  | 0.33635326 | 0.535103974 |
| Llph      | 4   | 1.982252298 | 1.153005464 | -0.829246834 | 0.33668267 | 0.535337131 |
| Ywhab     | 40  | 1.174863044 | 0.838085485 | -0.33677756  | 0.33669254 | 0.535337131 |
| 30027J09R | 36  | 14.12100437 | 15.30635443 | 1.185350058  | 0.33674111 | 0.535356346 |
| Lrp12     | 80  | 1.603632398 | 1.481108477 | -0.122523921 | 0.33717678 | 0.535953867 |
| Rcor1     | 69  | 1.455279112 | 1.170259272 | -0.28501984  | 0.33719    | 0.535953867 |
| Smim20    | 43  | 1.632797248 | 1.335119102 | -0.297678146 | 0.33727864 | 0.536006976 |
| 30068E07F | 42  | 0.917263925 | 1.097238789 | 0.179974864  | 0.337333   | 0.536006976 |
| Eif2ak2   | 26  | 1.594498624 | 1.245995918 | -0.348502707 | 0.33730434 | 0.536006976 |
| Tmem150a  | 58  | 1.635229914 | 1.806106384 | 0.17087647   | 0.33755543 | 0.536302342 |
| Cep70     | 40  | 1.30957501  | 1.242296974 | -0.067278037 | 0.33775656 | 0.536447634 |
| Bloc1s5   | 34  | 1.090281992 | 0.826990112 | -0.26329188  | 0.33770433 | 0.536447634 |
| Zfand2b   | 46  | 1.369334654 | 1.145120751 | -0.224213903 | 0.33773849 | 0.536447634 |
| Rai14     | 32  | 2.107711476 | 1.495868671 | -0.611842805 | 0.33789422 | 0.536521626 |
| Gemin7    | 44  | 2.159400302 | 2.763166934 | 0.603766632  | 0.33791283 | 0.536521626 |



|            |     |             |             |              |            |             |
|------------|-----|-------------|-------------|--------------|------------|-------------|
| Gamt       | 12  | 2.307596176 | 1.850275247 | -0.457320929 | 0.33791268 | 0.536521626 |
| Eapp       | 33  | 1.077509307 | 1.390122035 | 0.312612728  | 0.33795695 | 0.536533627 |
| Rangap1    | 11  | 2.684857303 | 2.195160917 | -0.489696386 | 0.33803151 | 0.536593932 |
| Ap2m1      | 29  | 1.791748191 | 1.513663969 | -0.278084222 | 0.33823909 | 0.53683432  |
| Tma16      | 50  | 2.344805971 | 1.708621126 | -0.636184844 | 0.33831553 | 0.53683432  |
| Gcc2       | 5   | 0.881595882 | 1.936842105 | 1.055246224  | 0.33832928 | 0.53683432  |
| Hnrnpd     | 118 | 1.057995043 | 1.013578393 | -0.04441665  | 0.33829019 | 0.53683432  |
| Mrpl50     | 2   | 2.586206897 | 1.616628176 | -0.969578721 | 0.33846655 | 0.536994064 |
| Vapb       | 44  | 0.886020417 | 0.864601193 | -0.021419224 | 0.33860557 | 0.537156549 |
| Vav2       | 90  | 0.997441507 | 0.984389566 | -0.013051941 | 0.33867213 | 0.537204063 |
| Gm15417    | 37  | 1.498003583 | 1.066120215 | -0.431883367 | 0.33876804 | 0.537277906 |
| 130001C03F | 22  | 1.990380411 | 1.516744213 | -0.473636198 | 0.33879191 | 0.537277906 |
| Chmp2b     | 44  | 1.665114346 | 1.250322299 | -0.414792047 | 0.33882871 | 0.537278196 |
| Tob2       | 32  | 1.747830749 | 1.481655444 | -0.266175305 | 0.33891326 | 0.537336811 |
| Smg1       | 83  | 0.975713145 | 1.013765883 | 0.038052738  | 0.33893891 | 0.537336811 |
| Hsph1      | 62  | 1.552623902 | 1.398740475 | -0.153883427 | 0.33902344 | 0.537412758 |
| Lpcat4     | 93  | 1.132427088 | 1.010064085 | -0.122363003 | 0.33914907 | 0.537437742 |
| H2-DMa     | 5   | 3.479938272 | 2.470423924 | -1.009514348 | 0.33913397 | 0.537437742 |
| Lmbr1      | 8   | 0.295868347 | 0           | -0.295868347 | 0.3390869  | 0.537437742 |
| Ppp1ca     | 78  | 1.888126224 | 2.070890216 | 0.182763992  | 0.33927158 | 0.537573825 |
| '00096K18F | 57  | 1.319373024 | 1.379302719 | 0.059929695  | 0.33947629 | 0.537840107 |
| Baiap2     | 124 | 1.416263607 | 1.439247389 | 0.022983782  | 0.33957486 | 0.537938196 |
| Akap8      | 61  | 1.253070084 | 1.431842161 | 0.178772076  | 0.3397063  | 0.538033734 |
| Ube2j2     | 49  | 1.068907439 | 1.37496939  | 0.306061952  | 0.3397085  | 0.538033734 |
| Nsun3      | 30  | 1.972035249 | 1.601028991 | -0.371006258 | 0.34002195 | 0.5384276   |
| Col4a1     | 25  | 1.162745643 | 1.145665386 | -0.017080256 | 0.34003057 | 0.5384276   |
| Gtf3c6     | 5   | 0.601503759 | 1.359079517 | 0.757575758  | 0.34008285 | 0.538452277 |
| Klra8      | 4   | 83.67021277 | 77.68165395 | -5.988558812 | 0.34075795 | 0.53946296  |
| Pde6b      | 2   | 35.73369565 | 31.96933962 | -3.76435603  | 0.34116406 | 0.540047612 |
| Arhgef10   | 22  | 1.698626179 | 1.295643655 | -0.402982525 | 0.34126753 | 0.540153132 |
| Mybl2      | 48  | 1.013593461 | 1.193226001 | 0.179632539  | 0.34140389 | 0.540252416 |
| E2f6       | 61  | 8.790090828 | 8.939737707 | 0.149646879  | 0.34139482 | 0.540252416 |
| Erich1     | 29  | 1.631039034 | 1.459671106 | -0.171367928 | 0.3414965  | 0.540340692 |
| Gatc       | 8   | 1.140929065 | 1.521056113 | 0.380127049  | 0.341653   | 0.540530042 |

|            |    |             |             |              |            |             |
|------------|----|-------------|-------------|--------------|------------|-------------|
| Txndc15    | 9  | 2.149592171 | 1.586216904 | -0.563375267 | 0.34171895 | 0.540576091 |
| Mir207     | 18 | 1.649628564 | 1.49171471  | -0.157913855 | 0.34180117 | 0.540647882 |
| Gtf2f1     | 5  | 0.698689956 | 0.716410981 | 0.017721025  | 0.34184842 | 0.54066433  |
| Plat       | 9  | 2.026888436 | 3.444450679 | 1.417562243  | 0.34194174 | 0.540695381 |
| Ikbkb      | 34 | 1.532914008 | 1.58702191  | 0.054107902  | 0.34191582 | 0.540695381 |
| Micu3      | 57 | 1.277859797 | 1.087726802 | -0.190132995 | 0.34210293 | 0.540775444 |
| Btbd10     | 92 | 1.415958202 | 1.545677286 | 0.129719084  | 0.34203732 | 0.540775444 |
| Lsm14a     | 79 | 1.084233046 | 0.89202925  | -0.192203796 | 0.34209726 | 0.540775444 |
| Ppp6r2     | 72 | 1.20091994  | 1.319769365 | 0.118849425  | 0.34230541 | 0.541037225 |
| Ankrd42    | 32 | 0.994093171 | 0.935680275 | -0.058412896 | 0.34239197 | 0.541115758 |
| Pcyox1     | 20 | 1.01917458  | 0.970287998 | -0.048886582 | 0.34258551 | 0.541363312 |
| Tmx3       | 30 | 1.086556683 | 1.46576271  | 0.379206027  | 0.34263652 | 0.54138562  |
| Actl10     | 8  | 67.46794947 | 69.46760251 | 1.999653041  | 0.34269194 | 0.541414886 |
| Emp3       | 2  | 4.603174603 | 2.222018601 | -2.381156002 | 0.34304382 | 0.541679228 |
| Zfp871     | 12 | 1.730332994 | 1.809924103 | 0.07959111   | 0.3429169  | 0.541679228 |
| Itga5      | 16 | 1.413959787 | 1.375366915 | -0.038592872 | 0.34303021 | 0.541679228 |
| Nxf1       | 61 | 1.234608763 | 1.016769498 | -0.217839264 | 0.34298022 | 0.541679228 |
| Ppp6r3     | 31 | 1.53891927  | 1.368316005 | -0.170603266 | 0.34295133 | 0.541679228 |
| Gm16861    | 8  | 1.384810703 | 0.88436154  | -0.500449163 | 0.34325485 | 0.541895824 |
| Nudt16l1   | 8  | 1.384810703 | 0.88436154  | -0.500449163 | 0.34325485 | 0.541895824 |
| Aarsd1     | 15 | 1.429622801 | 0.879764837 | -0.549857964 | 0.34337326 | 0.542024447 |
| Spire2     | 90 | 1.309187815 | 1.297673965 | -0.01151385  | 0.34341645 | 0.542034309 |
| Zkscan8    | 3  | 0           | 0.660066007 | 0.660066007  | 0.34351324 | 0.542115776 |
| Dnaaf3     | 12 | 13.08079812 | 14.10212041 | 1.021322297  | 0.34355594 | 0.542115776 |
| Exoc4      | 27 | 2.92671308  | 2.083166357 | -0.843546722 | 0.3435789  | 0.542115776 |
| Cacul1     | 56 | 1.351353698 | 1.465999339 | 0.114645641  | 0.34363508 | 0.542146138 |
| Shb        | 64 | 1.043589787 | 1.091954081 | 0.048364294  | 0.34386497 | 0.542450505 |
| Phrf1      | 50 | 1.195984266 | 1.24992786  | 0.053943594  | 0.34392146 | 0.542481294 |
| Numb       | 63 | 1.604734856 | 1.5724472   | -0.032287657 | 0.34420842 | 0.542875575 |
| '00012D01F | 2  | 5.662878788 | 4.042920736 | -1.619958052 | 0.34427008 | 0.542914474 |
| Abhd4      | 31 | 1.71477475  | 1.499937527 | -0.214837223 | 0.3444903  | 0.543203387 |
| Ccdc93     | 12 | 2.722853592 | 3.122920727 | 0.400067135  | 0.34466001 | 0.543239115 |
| I30005H10F | 24 | 1.037980624 | 1.350176579 | 0.312195954  | 0.34466104 | 0.543239115 |
| Tmem185b   | 70 | 2.109876175 | 1.614605617 | -0.495270557 | 0.3446271  | 0.543239115 |

|            |     |             |             |              |            |             |
|------------|-----|-------------|-------------|--------------|------------|-------------|
| D3Ert254e  | 55  | 2.163426355 | 1.721332536 | -0.44209382  | 0.34455565 | 0.543239115 |
| Itgb5      | 27  | 1.274880074 | 1.025284045 | -0.249596029 | 0.34470296 | 0.543246836 |
| Slc38a10   | 15  | 1.341226943 | 1.443363612 | 0.102136669  | 0.34485326 | 0.54342533  |
| I7Rn6      | 15  | 1.804682243 | 1.863779182 | 0.05909694   | 0.34502462 | 0.543550244 |
| Atoh1      | 33  | 34.90568641 | 35.80404425 | 0.89835784   | 0.34499995 | 0.543550244 |
| Rc3h2      | 44  | 1.41606285  | 1.204561508 | -0.211501341 | 0.34504521 | 0.543550244 |
| Add1       | 41  | 1.256549362 | 1.220788028 | -0.035761334 | 0.34508069 | 0.543550244 |
| Galnt2     | 98  | 1.284755316 | 1.039895084 | -0.244860232 | 0.34529431 | 0.543828352 |
| Umad1      | 33  | 1.459919293 | 1.466835189 | 0.006915896  | 0.34544455 | 0.544006577 |
| Utp3       | 63  | 1.285399862 | 1.446529096 | 0.161129234  | 0.34562376 | 0.544113619 |
| Nans       | 34  | 0.988616953 | 0.741605614 | -0.247011339 | 0.34559049 | 0.544113619 |
| Fam181b    | 21  | 58.80273536 | 59.8095427  | 1.006807347  | 0.34556964 | 0.544113619 |
| Nme6       | 14  | 1.679069574 | 1.685038994 | 0.00596942   | 0.34576308 | 0.544274553 |
| I30583K01F | 26  | 1.376861555 | 1.38779322  | 0.010931665  | 0.34590483 | 0.544439291 |
| Plekhm1    | 31  | 1.472113157 | 1.170012185 | -0.302100972 | 0.34597274 | 0.544487766 |
| Cnrip1     | 22  | 28.29513193 | 30.94511113 | 2.649979197  | 0.34609947 | 0.544570402 |
| Ggta1      | 28  | 1.477025821 | 1.375406395 | -0.101619426 | 0.34606796 | 0.544570402 |
| Fbxo30     | 86  | 1.531861836 | 1.63482145  | 0.102959614  | 0.3461996  | 0.544604707 |
| Ednrb      | 20  | 40.11565401 | 41.12283567 | 1.007181666  | 0.34623261 | 0.544604707 |
| Emg1       | 17  | 1.135126297 | 1.104980328 | -0.030145969 | 0.34622366 | 0.544604707 |
| Zadh2      | 101 | 1.360733658 | 1.264648649 | -0.096085009 | 0.34635169 | 0.544733626 |
| Chrm4      | 48  | 3.778384602 | 4.747440985 | 0.969056383  | 0.34641599 | 0.544776366 |
| Pdcd10     | 35  | 1.831989157 | 2.096775483 | 0.264786325  | 0.34652612 | 0.544891153 |
| Phax       | 27  | 2.542495772 | 2.191843399 | -0.350652374 | 0.34657144 | 0.544904027 |
| '00030K09F | 7   | 0.272975432 | 0.773594636 | 0.500619204  | 0.34668139 | 0.544960117 |
| '00045H11F | 46  | 1.117474299 | 1.196133364 | 0.078659064  | 0.3466632  | 0.544960117 |
| Mir219a-1  | 20  | 16.50720758 | 17.98225828 | 1.475050699  | 0.34674601 | 0.545003318 |
| Zbtb12     | 94  | 1.676623957 | 1.459544477 | -0.217079481 | 0.34695103 | 0.545208767 |
| I30013E15F | 9   | 1.205132201 | 1.011570426 | -0.193561775 | 0.34694329 | 0.545208767 |
| Ociad1     | 20  | 1.184603705 | 1.013733472 | -0.170870233 | 0.34728464 | 0.545412064 |
| Glt8d1     | 28  | 2.012287165 | 1.163961927 | -0.848325238 | 0.34727521 | 0.545412064 |
| Traf6      | 68  | 1.425228928 | 1.431881276 | 0.006652348  | 0.34736102 | 0.545412064 |
| Abcb1b     | 14  | 0.865924486 | 0.994499864 | 0.128575378  | 0.34713801 | 0.545412064 |
| Mief2      | 23  | 1.033911094 | 0.797735659 | -0.236175435 | 0.34737775 | 0.545412064 |

|           |    |             |             |              |            |             |
|-----------|----|-------------|-------------|--------------|------------|-------------|
| Pip5k1c   | 56 | 1.31860366  | 1.223683513 | -0.094920147 | 0.3473149  | 0.545412064 |
| Nfu1      | 17 | 0.899902514 | 0.659978916 | -0.239923598 | 0.34720289 | 0.545412064 |
| Polr3a    | 35 | 1.106774556 | 1.420618547 | 0.31384399   | 0.34719988 | 0.545412064 |
| Pelp1     | 21 | 2.092826853 | 1.985733859 | -0.107092995 | 0.34759973 | 0.54568993  |
| Gm14057   | 3  | 95.26270457 | 96.16539224 | 0.902687675  | 0.3476291  | 0.54568993  |
| Psemb3    | 9  | 1.707482332 | 0.735818047 | -0.971664285 | 0.34770279 | 0.545722004 |
| Atf7ip    | 20 | 1.602804036 | 0.83844651  | -0.764357526 | 0.34772392 | 0.545722004 |
| Gata3     | 26 | 10.79629253 | 11.04757396 | 0.251281424  | 0.34798239 | 0.546069259 |
| Ccrn4l    | 42 | 1.043678956 | 0.838772641 | -0.204906315 | 0.34807196 | 0.546151412 |
| Glod4     | 40 | 1.243568632 | 1.221167595 | -0.022401036 | 0.34823113 | 0.546284325 |
| Mrpl11    | 6  | 3.215781515 | 3.060735881 | -0.155045633 | 0.3482297  | 0.546284325 |
| Nqo2      | 8  | 2.209937817 | 2.18181391  | -0.028123907 | 0.34833356 | 0.546386601 |
| Elf1      | 51 | 0.866391021 | 0.979641616 | 0.113250595  | 0.3484163  | 0.546457971 |
| 10043G02F | 60 | 1.300235451 | 1.485696982 | 0.185461531  | 0.34861497 | 0.546711125 |
| Appl2     | 18 | 1.046753745 | 1.603312623 | 0.556558878  | 0.34875273 | 0.546788832 |
| Ikbkap    | 11 | 3.274567848 | 2.327009961 | -0.947557886 | 0.34876068 | 0.546788832 |
| Sin3a     | 61 | 1.453728192 | 1.553811624 | 0.100083432  | 0.3487763  | 0.546788832 |
| Zfp639    | 64 | 1.560873618 | 1.252996736 | -0.307876882 | 0.34895583 | 0.547011845 |
| Lias      | 33 | 1.187624615 | 0.924030092 | -0.263594523 | 0.3490362  | 0.547079381 |
| Nsl1      | 22 | 0.867292731 | 0.777233545 | -0.090059187 | 0.34918274 | 0.547192175 |
| Idi1      | 3  | 2.032520325 | 0.366300366 | -1.666219959 | 0.3491734  | 0.547192175 |
| Kif3b     | 46 | 6.458802385 | 5.873505242 | -0.585297143 | 0.34923764 | 0.547202977 |
| Bloc1s6   | 8  | 1.417530808 | 1.36442069  | -0.053110118 | 0.34926421 | 0.547202977 |
| Mad11l    | 40 | 1.60748615  | 1.88583855  | 0.2783524    | 0.34931683 | 0.547226992 |
| Gm16023   | 25 | 0.8582455   | 0.574917    | -0.2833285   | 0.34941699 | 0.547325461 |
| Pnpt1     | 14 | 1.446897181 | 1.293994563 | -0.152902618 | 0.34950103 | 0.547398674 |
| Ap3m1     | 17 | 1.770244129 | 1.995924792 | 0.225680663  | 0.34991549 | 0.547989315 |
| Fastkd5   | 34 | 1.827908727 | 1.98262287  | 0.154714143  | 0.35030708 | 0.548544027 |
| Fbp2      | 15 | 22.25593689 | 21.73005961 | -0.525877284 | 0.3503904  | 0.548615955 |
| Galnt11   | 57 | 1.069115414 | 1.03887008  | -0.030245334 | 0.35051111 | 0.548746406 |
| Pld3      | 7  | 1.703357937 | 1.350320975 | -0.353036962 | 0.35075187 | 0.54877204  |
| Poldip2   | 10 | 1.910088123 | 2.158030265 | 0.247942142  | 0.35065858 | 0.54877204  |
| Saal1     | 13 | 1.31050117  | 0.866436123 | -0.444065047 | 0.35073407 | 0.54877204  |
| Troap     | 35 | 1.944022669 | 1.871760344 | -0.072262325 | 0.35070551 | 0.54877204  |

|            |     |             |             |              |            |             |
|------------|-----|-------------|-------------|--------------|------------|-------------|
| Dctn3      | 10  | 1.221353212 | 1.095277033 | -0.126076178 | 0.35068667 | 0.54877204  |
| Cnot3      | 58  | 0.912981533 | 0.873645375 | -0.039336158 | 0.35074772 | 0.54877204  |
| Ino80e     | 14  | 1.596059683 | 1.171172475 | -0.424887208 | 0.35082738 | 0.548787901 |
| Cdkn2c     | 133 | 1.462191893 | 1.261151499 | -0.201040394 | 0.35086451 | 0.548787901 |
| Ppp1r18    | 39  | 1.294597999 | 1.476009645 | 0.181411646  | 0.35087421 | 0.548787901 |
| Foxj1      | 21  | 1.779567154 | 1.618568074 | -0.160999079 | 0.35099135 | 0.548912617 |
| Rbm38      | 49  | 2.697419412 | 2.62422286  | -0.073196552 | 0.35108769 | 0.549004773 |
| Zfp382     | 27  | 1.234952863 | 1.146838547 | -0.088114315 | 0.35115675 | 0.549054253 |
| Atg5       | 49  | 1.054633204 | 1.105097574 | 0.05046437   | 0.35127828 | 0.549166222 |
| Znhit1     | 27  | 1.732709154 | 1.410123399 | -0.322585755 | 0.35130321 | 0.549166222 |
| Atp5d      | 32  | 1.030240921 | 0.83390206  | -0.19633886  | 0.35139261 | 0.549247457 |
| Arhgap17   | 49  | 1.661500036 | 1.385805604 | -0.275694431 | 0.35166614 | 0.549616466 |
| Slc26a8    | 19  | 8.694227432 | 9.226292519 | 0.532065087  | 0.35205814 | 0.549877713 |
| Tkt        | 18  | 1.122319243 | 1.040358544 | -0.0819607   | 0.35204994 | 0.549877713 |
| Uxt        | 6   | 20.99228879 | 19.48894715 | -1.503341639 | 0.35196064 | 0.549877713 |
| Mocs2      | 42  | 1.258165477 | 1.346214914 | 0.088049437  | 0.35204322 | 0.549877713 |
| Gtf3c4     | 20  | 0.569272822 | 0.88452313  | 0.315250308  | 0.3519014  | 0.549877713 |
| !30072C01F | 6   | 20.99228879 | 19.48894715 | -1.503341639 | 0.35196064 | 0.549877713 |
| Reep6      | 42  | 2.62417486  | 2.123855117 | -0.500319742 | 0.35223905 | 0.550043192 |
| Tnfrsf18   | 1   | 96.15384615 | 93.95604396 | -2.197802198 | 0.35223293 | 0.550043192 |
| Gm12338    | 3   | 91.41500849 | 94.30078084 | 2.885772349  | 0.35245718 | 0.550149626 |
| Zbtb1      | 98  | 1.188015259 | 1.018389325 | -0.169625934 | 0.35243267 | 0.550149626 |
| Rmnd5b     | 49  | 1.399744944 | 1.335104027 | -0.064640917 | 0.35241394 | 0.550149626 |
| Atp5j      | 108 | 1.069727742 | 1.255343565 | 0.185615823  | 0.35234726 | 0.550149626 |
| Dclk3      | 41  | 20.1678671  | 21.93039036 | 1.762523268  | 0.35249536 | 0.550150698 |
| !30041J22R | 53  | 2.626921655 | 2.385126231 | -0.241795424 | 0.35262466 | 0.550293982 |
| Mycs       | 11  | 49.26788718 | 48.14188626 | -1.126000913 | 0.35266438 | 0.550297436 |
| Poc1b      | 49  | 1.496984372 | 1.350427434 | -0.146556938 | 0.35278103 | 0.550393839 |
| Ttc27      | 11  | 1.167347967 | 2.084804915 | 0.917456948  | 0.35280118 | 0.550393839 |
| Socs7      | 115 | 1.404396304 | 1.394919755 | -0.009476549 | 0.35287615 | 0.550452281 |
| Fam20c     | 121 | 1.16861514  | 1.163797401 | -0.00481774  | 0.3530289  | 0.550632024 |
| '00030C10F | 45  | 72.08277469 | 72.95961163 | 0.876836945  | 0.35313533 | 0.55072648  |
| Ogfr       | 24  | 0.950983989 | 0.826962218 | -0.124021771 | 0.35316452 | 0.55072648  |
| Adsl       | 32  | 1.252403214 | 1.149277849 | -0.103125365 | 0.35332156 | 0.550912818 |

|         |     |             |             |              |            |             |
|---------|-----|-------------|-------------|--------------|------------|-------------|
| Tcf25   | 47  | 0.970952681 | 1.003152784 | 0.032200103  | 0.35352933 | 0.551178213 |
| Nsmf    | 35  | 10.43240002 | 10.08694342 | -0.345456608 | 0.35374377 | 0.551453952 |
| Bmpr2   | 104 | 1.396723475 | 1.356169645 | -0.04055383  | 0.35381845 | 0.551511788 |
| Serinc5 | 25  | 1.97416018  | 1.507885088 | -0.466275092 | 0.35394031 | 0.551525969 |
| Tmem70  | 67  | 1.303229265 | 1.099042068 | -0.204187198 | 0.35393006 | 0.551525969 |
| Fuz     | 8   | 1.057469861 | 0.893099149 | -0.164370712 | 0.35392662 | 0.551525969 |
| Mir1903 | 8   | 1.398440312 | 1.760653508 | 0.362213196  | 0.35413686 | 0.551656499 |
| Arid4a  | 49  | 1.413731949 | 1.573634049 | 0.1599021    | 0.35410528 | 0.551656499 |
| Tspan12 | 27  | 4.309565838 | 3.608810012 | -0.700755826 | 0.35406917 | 0.551656499 |
| Cdkl2   | 19  | 0.823495196 | 0.39722534  | -0.426269856 | 0.35425234 | 0.551777826 |
| B2m     | 7   | 1.42086773  | 1.03030119  | -0.39056654  | 0.35441059 | 0.551907146 |
| Zfp410  | 39  | 1.413451572 | 1.018891752 | -0.39455982  | 0.35437683 | 0.551907146 |
| Ndufs7  | 3   | 6.431329782 | 4.240017792 | -2.191311991 | 0.35473631 | 0.552355749 |
| Nrbp2   | 6   | 79.65679516 | 80.54519785 | 0.888402688  | 0.35512564 | 0.552785996 |
| Nrbf2   | 74  | 1.298152744 | 1.161736011 | -0.136416733 | 0.35507308 | 0.552785996 |
| Trmt12  | 23  | 1.892055508 | 1.713592864 | -0.178462644 | 0.35511493 | 0.552785996 |
| Zfp3612 | 30  | 1.077731563 | 1.063203269 | -0.014528294 | 0.35533565 | 0.552995581 |
| Dcp1a   | 32  | 1.68440173  | 1.355425551 | -0.328976179 | 0.35530548 | 0.552995581 |
| Pik3ap1 | 34  | 6.576023745 | 7.242605568 | 0.666581823  | 0.35539086 | 0.553022849 |
| Cep85   | 27  | 1.984124661 | 1.757428507 | -0.226696154 | 0.35543948 | 0.553039868 |
| Map3k11 | 24  | 1.675653092 | 1.427306699 | -0.248346393 | 0.355602   | 0.553143323 |
| Mak16   | 50  | 1.330124334 | 1.28800319  | -0.042121144 | 0.35558489 | 0.553143323 |
| Dnmt1   | 50  | 1.452904111 | 1.615132077 | 0.162227966  | 0.35565676 | 0.553143323 |
| Mir1907 | 10  | 44.60368905 | 44.32478387 | -0.278905183 | 0.3556228  | 0.553143323 |
| Pcgf1   | 36  | 1.720586682 | 1.576286798 | -0.144299884 | 0.35572507 | 0.553190931 |
| Cog8    | 50  | 0.822656386 | 0.822594736 | -6.16E-05    | 0.35603365 | 0.553526193 |
| Rnu12   | 11  | 1.355937261 | 0.841914948 | -0.514022313 | 0.35609154 | 0.553526193 |
| Mettl9  | 66  | 1.826953917 | 1.468939424 | -0.358014493 | 0.35609017 | 0.553526193 |
| Tspan14 | 85  | 1.244632032 | 1.190253152 | -0.054378881 | 0.35602037 | 0.553526193 |
| Rpl5    | 59  | 1.283350098 | 1.227916985 | -0.055433112 | 0.35617584 | 0.55359859  |
| Dync1h1 | 50  | 1.426293033 | 0.976143755 | -0.450149279 | 0.35633329 | 0.553784651 |
| Frzb    | 9   | 10.4627077  | 9.150991679 | -1.311716021 | 0.35640295 | 0.553834253 |
| Cit     | 5   | 8.292613636 | 5.357213062 | -2.935400575 | 0.35707725 | 0.554823338 |
| Marcks  | 7   | 1.210653753 | 0.981425974 | -0.229227779 | 0.35717194 | 0.554911705 |

|            |     |             |             |              |            |             |
|------------|-----|-------------|-------------|--------------|------------|-------------|
| Rbm4b      | 42  | 1.277030539 | 1.27812683  | 0.001096291  | 0.35726685 | 0.555000395 |
| Fbxo21     | 38  | 1.448785442 | 1.260332614 | -0.188452828 | 0.35731591 | 0.555017852 |
| Bzw1       | 49  | 0.967504305 | 0.86598105  | -0.101523256 | 0.35761621 | 0.555425518 |
| Ube2l3     | 26  | 1.49720727  | 1.268218361 | -0.228988909 | 0.35771909 | 0.555526508 |
| 1630020A0€ | 10  | 3.017295481 | 3.062871609 | 0.045576129  | 0.35785676 | 0.555632483 |
| Lin52      | 14  | 1.452204489 | 1.269898697 | -0.182305792 | 0.35786306 | 0.555632483 |
| Gpn2       | 23  | 1.655861102 | 1.398777805 | -0.257083297 | 0.35793508 | 0.555685498 |
| Polb       | 35  | 1.749245364 | 1.429387597 | -0.319857768 | 0.35800951 | 0.555742253 |
| Dnaaf2     | 26  | 1.55751497  | 1.225958833 | -0.331556138 | 0.35827227 | 0.556088066 |
| Fam65a     | 84  | 1.552038427 | 1.261567276 | -0.290471151 | 0.35830807 | 0.556088066 |
| Tnr        | 3   | 29.66101695 | 33.98969831 | 4.328681358  | 0.3584718  | 0.556228514 |
| Cdk5rap3   | 27  | 3.080680118 | 3.331000264 | 0.250320146  | 0.35847438 | 0.556228514 |
| Sh3bp4     | 72  | 1.648666497 | 1.476483789 | -0.172182709 | 0.35854291 | 0.556256906 |
| Rbfox2     | 56  | 1.328199423 | 0.894966459 | -0.433232964 | 0.35856849 | 0.556256906 |
| L10008F13F | 97  | 1.359066058 | 1.187465848 | -0.17160021  | 0.35903597 | 0.556923237 |
| Rnf44      | 145 | 2.134247945 | 1.732608627 | -0.401639319 | 0.35928355 | 0.557126743 |
| Parp14     | 15  | 1.010025063 | 1.013938524 | 0.003913461  | 0.35929024 | 0.557126743 |
| Tpx2       | 10  | 1.819839861 | 1.770708368 | -0.049131493 | 0.35929697 | 0.557126743 |
| Gjd2       | 7   | 47.62052007 | 50.14880952 | 2.528289454  | 0.35931903 | 0.557126743 |
| 30584F24F  | 1   | 86.15384615 | 80.28169014 | -5.872156013 | 0.35947061 | 0.557185145 |
| Tdp1       | 35  | 0.692240562 | 0.977678848 | 0.285438285  | 0.35940306 | 0.557185145 |
| Tmem260    | 56  | 1.376175974 | 1.076391833 | -0.299784141 | 0.35946352 | 0.557185145 |
| Tpr        | 2   | 4.573170732 | 2.3860799   | -2.187090832 | 0.35968584 | 0.557342136 |
| Fam57a     | 84  | 1.277436442 | 1.402734321 | 0.125297879  | 0.35964183 | 0.557342136 |
| Gm6093     | 2   | 96.03174603 | 93.43418426 | -2.597561769 | 0.35968517 | 0.557342136 |
| Avpi1      | 8   | 2.033950935 | 2.261537866 | 0.227586931  | 0.35986293 | 0.557557662 |
| Dut        | 26  | 1.667555811 | 1.097388769 | -0.570167042 | 0.3602724  | 0.558133154 |
| Mir6914    | 7   | 94.94233723 | 96.09524397 | 1.152906739  | 0.36050709 | 0.558437778 |
| Trmt10c    | 33  | 1.239060042 | 0.933183333 | -0.30587671  | 0.36063226 | 0.558513748 |
| BC002163   | 11  | 27.04778554 | 27.46976308 | 0.421977543  | 0.36062208 | 0.558513748 |
| Gm8439     | 1   | 27.52293578 | 22.11538462 | -5.407551164 | 0.36087266 | 0.558827075 |
| Tex10      | 92  | 0.99950502  | 0.984870385 | -0.014634635 | 0.36102399 | 0.559002425 |
| Kdelr2     | 74  | 1.086658718 | 1.02281643  | -0.063842288 | 0.3613294  | 0.559416293 |
| Commd1     | 18  | 1.591844213 | 1.673233488 | 0.081389275  | 0.36146589 | 0.55950954  |

|            |     |             |             |              |            |             |
|------------|-----|-------------|-------------|--------------|------------|-------------|
| Gstcd      | 33  | 0.981354533 | 1.032288324 | 0.050933791  | 0.36144233 | 0.55950954  |
| Ptrhd1     | 32  | 1.643037301 | 1.072005849 | -0.571031452 | 0.36161914 | 0.559628692 |
| Ccl11      | 1   | 93.75       | 97.61904762 | 3.869047619  | 0.36160452 | 0.559628692 |
| Mrpl30     | 11  | 1.449864815 | 1.554588695 | 0.10472388   | 0.3618072  | 0.559815953 |
| Ptdss1     | 32  | 1.257740572 | 1.453973959 | 0.196233386  | 0.36185459 | 0.559815953 |
| Nol12      | 34  | 1.37341098  | 1.252473448 | -0.120937533 | 0.3618431  | 0.559815953 |
| BC029722   | 24  | 1.218763674 | 1.472699734 | 0.25393606   | 0.36192805 | 0.559870571 |
| Fam118b    | 25  | 1.438427984 | 1.472851462 | 0.034423478  | 0.36199102 | 0.559908945 |
| Camsap3    | 14  | 1.284546833 | 1.192590005 | -0.091956828 | 0.36203495 | 0.559917876 |
| Dnajb11    | 40  | 1.252226445 | 1.114049841 | -0.138176604 | 0.36215278 | 0.560041089 |
| Rnase10    | 1   | 90.68322981 | 87.6344086  | -3.048821212 | 0.36229831 | 0.560207104 |
| Arcn1      | 31  | 1.138082208 | 0.881062315 | -0.257019893 | 0.36241361 | 0.560267311 |
| Ptbp1      | 4   | 1.734279077 | 0.841612864 | -0.892666214 | 0.36239253 | 0.560267311 |
| Ninj1      | 79  | 1.485024265 | 1.610164825 | 0.12514056   | 0.36250236 | 0.560345483 |
| Trim23     | 7   | 0.926738166 | 0.456095107 | -0.47064306  | 0.36284924 | 0.5608226   |
| Plrg1      | 8   | 0.465726921 | 0.093283582 | -0.372443339 | 0.36293816 | 0.560900949 |
| Pabpn1     | 32  | 1.50478726  | 1.673676131 | 0.168888871  | 0.36297884 | 0.560904754 |
| Tmem256    | 45  | 1.519859085 | 1.110828847 | -0.409030239 | 0.36330235 | 0.561345545 |
| Gm527      | 109 | 1.259678754 | 1.36001173  | 0.100332976  | 0.36352166 | 0.561566148 |
| Sntb2      | 73  | 0.993918755 | 1.033307134 | 0.03938838   | 0.36350944 | 0.561566148 |
| Mir1949    | 5   | 2.371262269 | 1.778265615 | -0.592996654 | 0.36365238 | 0.56170895  |
| Fam193b    | 56  | 1.838748983 | 1.569008978 | -0.269740005 | 0.36373468 | 0.561776944 |
| Mir130a    | 5   | 91.60862722 | 90.60486513 | -1.003762088 | 0.36383483 | 0.561818462 |
| Fam103a1   | 36  | 1.546500188 | 1.381126929 | -0.165373259 | 0.36383814 | 0.561818462 |
| Foxred1    | 25  | 1.10059719  | 0.92937353  | -0.17122366  | 0.36394387 | 0.561890112 |
| 30037G07F  | 23  | 1.210256964 | 0.815051076 | -0.395205888 | 0.36396112 | 0.561890112 |
| Gatsl2     | 37  | 2.036752516 | 1.800699178 | -0.236053338 | 0.36406884 | 0.561997282 |
| Lrig2      | 50  | 1.383008051 | 1.414627768 | 0.031619717  | 0.36433069 | 0.562235748 |
| 300002I08R | 5   | 3.573177748 | 3.033449673 | -0.539728076 | 0.36429821 | 0.562235748 |
| Tram1      | 20  | 1.899083215 | 1.191597516 | -0.707485699 | 0.36433827 | 0.562235748 |
| 30006A16F  | 54  | 6.101296312 | 5.462790713 | -0.6385056   | 0.36458401 | 0.562555812 |
| Fam228b    | 5   | 3.376507722 | 3.604036715 | 0.227528993  | 0.36468412 | 0.56265112  |
| Arpc5l     | 50  | 0.919968548 | 1.006715761 | 0.086747213  | 0.3648159  | 0.56277539  |
| Fos        | 35  | 1.715126481 | 1.654149051 | -0.06097743  | 0.36484137 | 0.56277539  |



|         |     |             |             |              |            |             |
|---------|-----|-------------|-------------|--------------|------------|-------------|
| Atg101  | 40  | 1.105046696 | 1.020806618 | -0.084240078 | 0.36489333 | 0.562796374 |
| Gm6644  | 24  | 0.896551732 | 0.679602931 | -0.216948801 | 0.36500593 | 0.562804457 |
| Kcnk3   | 70  | 10.07563166 | 10.42351701 | 0.347885347  | 0.36496058 | 0.562804457 |
| Smdt1   | 49  | 1.601035862 | 1.576862863 | -0.024172999 | 0.36501363 | 0.562804457 |
| Cog4    | 12  | 2.807068184 | 2.929383715 | 0.122315531  | 0.36513478 | 0.562872963 |
| Polm    | 24  | 1.445969288 | 1.104941597 | -0.341027691 | 0.3651057  | 0.562872963 |
| Kctd20  | 75  | 1.157584304 | 1.16570642  | 0.008122115  | 0.36526232 | 0.563010422 |
| Srpk1   | 82  | 1.259849216 | 1.200396465 | -0.059452751 | 0.36536102 | 0.563073488 |
| Ly96    | 8   | 1.895858857 | 1.667803306 | -0.228055551 | 0.36537997 | 0.563073488 |
| Snrnp48 | 30  | 1.804035095 | 1.613636073 | -0.190399022 | 0.36558317 | 0.563327463 |
| Tmub1   | 26  | 1.871881685 | 1.814292359 | -0.057589326 | 0.36603261 | 0.563960782 |
| Lrrfip1 | 100 | 1.473006931 | 1.342098224 | -0.130908708 | 0.3661712  | 0.564093323 |
| Cnih2   | 55  | 2.797271533 | 3.13775336  | 0.340481827  | 0.36619552 | 0.564093323 |
| Dlst    | 83  | 1.697198506 | 1.425410126 | -0.27178838  | 0.36632997 | 0.564191319 |
| Enox1   | 88  | 26.11535407 | 27.73828214 | 1.622928069  | 0.36633603 | 0.564191319 |
| Vps39   | 17  | 1.905338986 | 1.308306023 | -0.597032964 | 0.36652291 | 0.564242253 |
| Dlx6os2 | 8   | 37.0901372  | 40.07675271 | 2.986615513  | 0.36648278 | 0.564242253 |
| Uso1    | 63  | 1.580118572 | 1.107025357 | -0.473093215 | 0.36646318 | 0.564242253 |
| Zfp942  | 6   | 0.977686694 | 1.082558005 | 0.104871311  | 0.36649773 | 0.564242253 |
| Dhx40   | 14  | 0.805740551 | 1.062195538 | 0.256454987  | 0.36679583 | 0.564603163 |
| Sharpin | 10  | 1.15398679  | 1.764466201 | 0.610479411  | 0.36687594 | 0.564638527 |
| Cbx8    | 36  | 1.427225515 | 1.701352651 | 0.274127136  | 0.36689576 | 0.564638527 |
| Zfp59   | 8   | 1.998373427 | 1.778938402 | -0.219435025 | 0.36704247 | 0.564805077 |
| Tgif2   | 27  | 1.688671943 | 1.64639644  | -0.042275503 | 0.36723714 | 0.56501867  |
| Exosc5  | 15  | 1.340600511 | 1.087353978 | -0.253246533 | 0.36725828 | 0.56501867  |
| Egf     | 6   | 16.09507004 | 17.09150802 | 0.996437986  | 0.36740078 | 0.565125133 |
| Lrba    | 97  | 1.357011795 | 1.381976396 | 0.024964601  | 0.36742936 | 0.565125133 |
| Crls1   | 90  | 1.034434154 | 1.201584709 | 0.167150555  | 0.36744302 | 0.565125133 |
| Slc35e4 | 13  | 2.488244479 | 2.687473971 | 0.199229491  | 0.36751282 | 0.56517324  |
| Glrx5   | 51  | 1.194562576 | 1.041662328 | -0.152900248 | 0.36756894 | 0.565200317 |
| Irx5    | 69  | 1.776169577 | 1.668731904 | -0.107437673 | 0.36773318 | 0.565393621 |
| Rexo2   | 41  | 1.292462415 | 1.185248021 | -0.107214394 | 0.36788485 | 0.565533658 |
| Kpna2   | 42  | 1.695423577 | 1.425327023 | -0.270096554 | 0.36793988 | 0.565533658 |
| Ston1   | 3   | 28.74129353 | 26.63690476 | -2.10438877  | 0.36793905 | 0.565533658 |

|            |    |             |             |              |            |             |
|------------|----|-------------|-------------|--------------|------------|-------------|
| Rev3l      | 72 | 1.335596226 | 1.353426384 | 0.017830158  | 0.36820804 | 0.565886543 |
| Zfp524     | 40 | 1.254345639 | 1.03221569  | -0.22212995  | 0.36827548 | 0.565930916 |
| Rnf19b     | 89 | 0.923754168 | 0.803820075 | -0.119934093 | 0.36835491 | 0.565993713 |
| Hsd17b4    | 29 | 1.536291726 | 1.760497704 | 0.224205977  | 0.36864975 | 0.566387447 |
| Trim52     | 3  | 91.43730887 | 89.13015873 | -2.307150138 | 0.36877764 | 0.566524612 |
| Rad9b      | 11 | 1.326092355 | 1.368457248 | 0.042364893  | 0.36908828 | 0.566942464 |
| Mex3a      | 57 | 1.543216158 | 1.731892924 | 0.188676767  | 0.36917279 | 0.566953579 |
| Mat2a      | 62 | 1.358555677 | 1.133029021 | -0.225526656 | 0.36915765 | 0.566953579 |
| Mpst       | 16 | 2.178698904 | 1.39213314  | -0.786565764 | 0.36924615 | 0.567006903 |
| Babam1     | 25 | 8.427425902 | 8.398958515 | -0.028467387 | 0.3692885  | 0.567012604 |
| Wbp2       | 3  | 3.307888041 | 4.090206359 | 0.782318318  | 0.36937081 | 0.567079644 |
| Sdhaf2     | 27 | 1.837520573 | 1.70804433  | -0.129476244 | 0.36959045 | 0.567357493 |
| Vamp8      | 6  | 1.19047619  | 0.708941264 | -0.481534926 | 0.36964601 | 0.567383428 |
| Mir7672    | 51 | 1.340373165 | 1.538598037 | 0.198224872  | 0.36979743 | 0.567556485 |
| Mir1249    | 1  | 90.45454545 | 92.70072993 | 2.246184472  | 0.36991371 | 0.567629398 |
| Tmem222    | 54 | 1.295408666 | 1.317606067 | 0.022197401  | 0.36992231 | 0.567629398 |
| Tubgcp2    | 44 | 1.64362717  | 1.304018298 | -0.339608872 | 0.37000855 | 0.567643011 |
| Snhg10     | 38 | 1.8393648   | 1.777023936 | -0.062340864 | 0.36997491 | 0.567643011 |
| Sod2       | 54 | 4.428093144 | 4.012417496 | -0.415675648 | 0.37014567 | 0.567725442 |
| Nln        | 12 | 1.659556727 | 1.93157381  | 0.272017082  | 0.37011029 | 0.567725442 |
| Aggf1      | 54 | 0.920379504 | 1.069233549 | 0.148854045  | 0.37017834 | 0.567725442 |
| Itfg3      | 15 | 1.804559713 | 1.266253018 | -0.538306695 | 0.370424   | 0.568042816 |
| 30072M18f  | 64 | 1.040455204 | 1.001551852 | -0.038903352 | 0.37051323 | 0.568120282 |
| Wdr4       | 46 | 1.38364998  | 1.343292123 | -0.040357856 | 0.37064865 | 0.568260256 |
| Cul5       | 63 | 1.070683209 | 1.077657095 | 0.006973887  | 0.37068197 | 0.568260256 |
| 430038I01R | 14 | 1.689426752 | 1.829161625 | 0.139734872  | 0.37085269 | 0.568462594 |
| Abhd1      | 12 | 1.155000632 | 1.102653508 | -0.052347124 | 0.37091937 | 0.568505413 |
| Plek2      | 9  | 1.683543391 | 1.923850174 | 0.240306783  | 0.371334   | 0.569081476 |
| Zfp652os   | 95 | 1.12735594  | 1.056432959 | -0.070922981 | 0.37150834 | 0.569289203 |
| '00007G11F | 15 | 2.555631795 | 1.861072087 | -0.694559707 | 0.37187932 | 0.569798183 |
| Kiss1r     | 18 | 1.14341403  | 1.830665752 | 0.687251722  | 0.3720793  | 0.569985558 |
| Emc4       | 22 | 1.399086477 | 1.264156138 | -0.134930339 | 0.37206879 | 0.569985558 |
| Mir698     | 6  | 88.86256521 | 86.93390889 | -1.928656319 | 0.37212304 | 0.569993058 |
| Tnfaip8l1  | 12 | 0.496991188 | 0.086805556 | -0.410185633 | 0.37228567 | 0.570182645 |

|            |     |             |             |              |            |             |
|------------|-----|-------------|-------------|--------------|------------|-------------|
| Tspan9     | 63  | 1.94888316  | 1.632315518 | -0.316567642 | 0.37243769 | 0.570355943 |
| Dhx38      | 31  | 1.01792563  | 1.260702255 | 0.242776625  | 0.37251789 | 0.570419228 |
| Al593442   | 2   | 33.11460184 | 30.21084822 | -2.90375362  | 0.37284148 | 0.570594199 |
| Gtpbp6     | 19  | 1.305587093 | 0.772238006 | -0.533349087 | 0.37276627 | 0.570594199 |
| Tor1aip2   | 57  | 1.030228523 | 0.782473937 | -0.247754586 | 0.37294323 | 0.570594199 |
| Mlst8      | 39  | 1.10096373  | 1.350418212 | 0.249454482  | 0.37292027 | 0.570594199 |
| Rsg1       | 8   | 1.355970995 | 0.753894969 | -0.602076026 | 0.37271876 | 0.570594199 |
| Ptpr       | 10  | 27.33174942 | 24.71846688 | -2.61328254  | 0.37281905 | 0.570594199 |
| Fkbp5      | 90  | 1.052148193 | 0.887279811 | -0.164868382 | 0.37293571 | 0.570594199 |
| '00017D01F | 2   | 96.94332887 | 94.66666667 | -2.276662204 | 0.37287961 | 0.570594199 |
| Rsph1      | 1   | 19.32773109 | 15.34090909 | -3.986822002 | 0.37299705 | 0.57061705  |
| Ankrd13c   | 109 | 1.567387759 | 1.432189988 | -0.135197771 | 0.37305443 | 0.570645329 |
| Mvb12a     | 37  | 1.051419929 | 0.901836655 | -0.149583274 | 0.37322366 | 0.570844698 |
| Slmap      | 68  | 1.734388362 | 1.342219256 | -0.392169106 | 0.37341226 | 0.571073631 |
| Rhbdd1     | 28  | 4.209201424 | 4.277435765 | 0.068234341  | 0.3734612  | 0.57108896  |
| Nol8       | 9   | 0.666199024 | 0.920257527 | 0.254058503  | 0.37367549 | 0.571357103 |
| l30458C11F | 63  | 1.048905239 | 1.09515112  | 0.046245881  | 0.3737208  | 0.571366843 |
| l31439G07F | 14  | 1.380980983 | 1.52146096  | 0.140479977  | 0.37377783 | 0.571394509 |
| Bpnt1      | 23  | 0.996694506 | 0.665063774 | -0.331630732 | 0.3740115  | 0.571394557 |
| Zfp719     | 2   | 3.50877193  | 1.694915254 | -1.813856676 | 0.37391927 | 0.571394557 |
| Polrmt     | 26  | 1.055938676 | 1.202986905 | 0.147048229  | 0.37397495 | 0.571394557 |
| Adam9      | 38  | 1.183424684 | 1.214449092 | 0.031024408  | 0.37393842 | 0.571394557 |
| Appbp2     | 87  | 0.875929151 | 0.903882264 | 0.027953113  | 0.37382441 | 0.571394557 |
| Atf7       | 16  | 1.261164385 | 1.340960283 | 0.079795898  | 0.37388674 | 0.571394557 |
| Becn2      | 4   | 79.56042679 | 78.82198081 | -0.738445978 | 0.37427693 | 0.571740544 |
| Txndc5     | 95  | 1.530118663 | 1.531915083 | 0.00179642   | 0.37444496 | 0.571937678 |
| Slc25a26   | 25  | 1.309104546 | 1.274495373 | -0.034609173 | 0.37488956 | 0.57241842  |
| Espl1      | 20  | 1.677641766 | 1.666165448 | -0.011476318 | 0.37481883 | 0.57241842  |
| Dpp8       | 45  | 1.040511361 | 0.848252478 | -0.192258883 | 0.3748506  | 0.57241842  |
| Capza2     | 78  | 1.538761342 | 1.587102067 | 0.048340725  | 0.37491573 | 0.57241842  |
| Nudt1      | 5   | 0.414764079 | 0.806019839 | 0.39125576   | 0.37504112 | 0.572490735 |
| Slc39a7    | 23  | 1.754423697 | 1.469186903 | -0.285236794 | 0.37501263 | 0.572490735 |
| Ly6e       | 16  | 1.499302879 | 1.572257697 | 0.072954818  | 0.37511428 | 0.572542854 |
| Smyd3      | 8   | 1.848735719 | 2.062345086 | 0.213609367  | 0.37538537 | 0.572784127 |

|            |     |             |             |              |            |             |
|------------|-----|-------------|-------------|--------------|------------|-------------|
| Acy1       | 21  | 1.483874546 | 1.831064819 | 0.347190273  | 0.37534387 | 0.572784127 |
| Gm1976     | 4   | 2.093596059 | 2.476621859 | 0.383025799  | 0.37538946 | 0.572784127 |
| Eif4a1     | 8   | 2.943817904 | 2.034197372 | -0.909620533 | 0.37561013 | 0.573061238 |
| Hnrnpk     | 136 | 1.441763507 | 1.421168181 | -0.020595326 | 0.3757056  | 0.573147303 |
| Lrrc75a    | 112 | 1.535146163 | 1.421281687 | -0.113864476 | 0.37592913 | 0.573400028 |
| Tsnax      | 83  | 1.75869282  | 1.423053653 | -0.335639167 | 0.37594941 | 0.573400028 |
| Scnn1g     | 18  | 4.827209214 | 6.325390888 | 1.498181674  | 0.37608416 | 0.573545935 |
| Poc5       | 18  | 1.011475748 | 1.299761675 | 0.288285927  | 0.37621003 | 0.573678262 |
| Ppp2r3a    | 52  | 1.233455339 | 1.025837439 | -0.2076179   | 0.37654554 | 0.573803568 |
| Grwd1      | 16  | 1.846640044 | 1.666893199 | -0.179746845 | 0.37660048 | 0.573803568 |
| Wwox       | 24  | 0.934742962 | 1.053684997 | 0.118942035  | 0.37642595 | 0.573803568 |
| Luc7l2     | 15  | 2.133307669 | 1.574907977 | -0.558399692 | 0.37647888 | 0.573803568 |
| Eif2b1     | 20  | 0.99745431  | 0.642691204 | -0.354763106 | 0.37650903 | 0.573803568 |
| 330007119R | 58  | 1.020431304 | 1.054435181 | 0.034003877  | 0.37660503 | 0.573803568 |
| Sgtb       | 19  | 3.029343015 | 3.059108924 | 0.029765909  | 0.37638353 | 0.573803568 |
| Camsap2    | 71  | 1.294168754 | 1.109700495 | -0.184468259 | 0.37639645 | 0.573803568 |
| Rrp9       | 18  | 0.907728254 | 0.64889608  | -0.258832173 | 0.37664893 | 0.573810878 |
| Pcnxl3     | 61  | 1.468735048 | 1.102635441 | -0.366099607 | 0.37670651 | 0.573839028 |
| Rdh14      | 40  | 1.062070608 | 0.986823236 | -0.075247372 | 0.37686128 | 0.573938623 |
| Dis3l      | 45  | 1.221006622 | 0.995530219 | -0.225476403 | 0.37688923 | 0.573938623 |
| Ndufa10    | 35  | 1.713247958 | 1.430333202 | -0.282914756 | 0.3768343  | 0.573938623 |
| Tmem11     | 40  | 0.968684602 | 0.803602065 | -0.165082537 | 0.37704283 | 0.574112953 |
| Bloc1s3    | 3   | 1.908157406 | 3.026530478 | 1.118373071  | 0.37709737 | 0.574136413 |
| Rap1a      | 89  | 1.128152648 | 1.05546618  | -0.072686468 | 0.37741056 | 0.574534316 |
| Tial1      | 65  | 1.510098503 | 1.476201612 | -0.033896891 | 0.37743702 | 0.574534316 |
| Pcdhb1     | 7   | 56.03467608 | 53.61615274 | -2.41852334  | 0.37782281 | 0.574953674 |
| Dbr1       | 46  | 1.300048515 | 1.305243725 | 0.00519521   | 0.37783006 | 0.574953674 |
| Dapk3      | 24  | 1.080514453 | 1.141044218 | 0.060529765  | 0.37776524 | 0.574953674 |
| Lca5       | 37  | 1.103511645 | 1.067981429 | -0.035530216 | 0.37792847 | 0.575043802 |
| '00008003F | 3   | 22.59350483 | 22.61334965 | 0.019844811  | 0.3781624  | 0.575340082 |
| Supt6      | 14  | 1.424315488 | 1.297470851 | -0.126844637 | 0.37846724 | 0.575627964 |
| Meaf6      | 83  | 1.524834205 | 1.264286192 | -0.260548012 | 0.37841647 | 0.575627964 |
| Snx22      | 9   | 21.94574236 | 22.29110259 | 0.345360225  | 0.37846931 | 0.575627964 |
| Coq6       | 3   | 2.499463058 | 3.405000196 | 0.905537138  | 0.37879996 | 0.576070923 |

|            |     |             |             |              |            |             |
|------------|-----|-------------|-------------|--------------|------------|-------------|
| Dock7      | 93  | 1.037571072 | 1.111277596 | 0.073706524  | 0.37883906 | 0.576070923 |
| Sppl3      | 133 | 0.984798862 | 1.017714564 | 0.032915702  | 0.37888092 | 0.576074868 |
| Dus4l      | 18  | 1.227441795 | 1.029138405 | -0.198303389 | 0.37895266 | 0.576124255 |
| Sh3gl1     | 32  | 1.141853306 | 0.972612667 | -0.16924064  | 0.37911884 | 0.5762575   |
| Ssbp2      | 133 | 1.736682626 | 1.696339947 | -0.040342678 | 0.37911862 | 0.5762575   |
| Abi2       | 55  | 1.160863304 | 1.229562574 | 0.068699271  | 0.37971134 | 0.577098308 |
| Fam35a     | 71  | 0.970864697 | 0.812556216 | -0.158308481 | 0.37977673 | 0.577137911 |
| Pnrc2      | 21  | 0.683186436 | 0.37878407  | -0.304402366 | 0.37984039 | 0.577174882 |
| Mettl2     | 42  | 1.663803822 | 1.427564748 | -0.236239074 | 0.38035253 | 0.57786276  |
| Gm13830    | 36  | 1.586024884 | 1.872095805 | 0.286070921  | 0.38041826 | 0.57786276  |
| Rps5       | 34  | 1.373929652 | 1.185978081 | -0.187951571 | 0.3804506  | 0.57786276  |
| Tmem201    | 57  | 0.938527125 | 0.916554312 | -0.021972813 | 0.38042791 | 0.57786276  |
| Top1mt     | 6   | 3.040687806 | 3.200962116 | 0.16027431   | 0.38074491 | 0.578249928 |
| Ndnf2      | 52  | 5.450644586 | 5.184972818 | -0.265671768 | 0.38082713 | 0.578314938 |
| 120006O11F | 10  | 1.095737762 | 0.688912784 | -0.406824978 | 0.38096795 | 0.578468921 |
| Nub1       | 21  | 1.393309218 | 1.397191749 | 0.003882531  | 0.38103047 | 0.578503989 |
| Wdr43      | 61  | 2.869492218 | 2.95036599  | 0.080873772  | 0.38133597 | 0.578907932 |
| Mbd3       | 59  | 1.108042919 | 1.070330239 | -0.037712679 | 0.38137876 | 0.578913001 |
| 130030I06R | 35  | 18.09993769 | 18.12176508 | 0.021827389  | 0.38155374 | 0.578982159 |
| Usp21      | 30  | 1.809885879 | 1.963691209 | 0.15380533   | 0.38156988 | 0.578982159 |
| Magoh      | 13  | 21.97601454 | 22.352231   | 0.376216467  | 0.38158215 | 0.578982159 |
| Taf3       | 38  | 2.057362763 | 1.641223759 | -0.416139004 | 0.38152789 | 0.578982159 |
| Efr3a      | 76  | 0.791795979 | 0.898498646 | 0.106702667  | 0.38167104 | 0.579057155 |
| Sct        | 14  | 9.66668845  | 9.747285548 | 0.080597098  | 0.38175504 | 0.579124724 |
| Ufc1       | 8   | 1.791889217 | 1.944600563 | 0.152711346  | 0.38182847 | 0.579176243 |
| U2af114    | 8   | 1.050964596 | 1.237884655 | 0.186920059  | 0.38197391 | 0.579336962 |
| Zfp446     | 24  | 1.20559448  | 0.780375706 | -0.425218773 | 0.38223954 | 0.579620032 |
| Eif2s3x    | 12  | 1.783341242 | 1.543166563 | -0.240174679 | 0.38222088 | 0.579620032 |
| Arid1b     | 127 | 1.103062382 | 0.879594159 | -0.223468223 | 0.38234397 | 0.579718474 |
| Gcsh       | 39  | 12.16531948 | 11.46268803 | -0.702631455 | 0.382513   | 0.579783104 |
| Epdr1      | 6   | 2.19047619  | 1.880848494 | -0.309627696 | 0.38253768 | 0.579783104 |
| Egr1       | 39  | 1.925109441 | 1.820062727 | -0.105046714 | 0.38242645 | 0.579783104 |
| Strada     | 29  | 1.36184039  | 1.239710077 | -0.122130313 | 0.38254464 | 0.579783104 |
| Vegfb      | 78  | 1.456349117 | 1.548499208 | 0.092150092  | 0.38272609 | 0.579998201 |

|            |     |             |             |              |            |             |
|------------|-----|-------------|-------------|--------------|------------|-------------|
| Nudcd3     | 20  | 1.386579472 | 1.187961968 | -0.198617504 | 0.38305035 | 0.58042966  |
| Fanc1      | 22  | 1.12237781  | 1.268600508 | 0.146222699  | 0.38333307 | 0.580798091 |
| Spg11      | 29  | 2.043028616 | 1.51842113  | -0.524607486 | 0.38358311 | 0.581116921 |
| Ccn1       | 117 | 1.24233338  | 1.252734202 | 0.010400822  | 0.38369368 | 0.581224425 |
| Mir5106    | 1   | 94.59459459 | 96.7032967  | 2.108702109  | 0.38389449 | 0.581468595 |
| Lym9       | 38  | 1.346609868 | 1.142005045 | -0.204604823 | 0.38417836 | 0.5818385   |
| Abtb1      | 70  | 1.349478643 | 1.230932656 | -0.118545987 | 0.38453401 | 0.582317033 |
| Zcchc8     | 56  | 1.180568624 | 1.003053714 | -0.17751491  | 0.38462785 | 0.582399037 |
| Cdk19      | 12  | 2.293102965 | 2.021774497 | -0.271328468 | 0.384767   | 0.582489531 |
| 130018J23R | 2   | 2.257243259 | 4.383561644 | 2.126318385  | 0.38472734 | 0.582489531 |
| Stxbp4     | 22  | 1.403556883 | 1.281854642 | -0.121702242 | 0.38540128 | 0.583389552 |
| Iqce       | 70  | 1.16422385  | 1.245136445 | 0.080912595  | 0.3855338  | 0.58352996  |
| Tada2a     | 59  | 1.0574265   | 1.191465214 | 0.134038714  | 0.38558239 | 0.583543319 |
| Lman1      | 49  | 1.402594491 | 1.194684244 | -0.207910247 | 0.38572472 | 0.583698358 |
| Txndc12    | 8   | 1.732295106 | 1.43121521  | -0.301079896 | 0.38576439 | 0.583698358 |
| Lsm2       | 13  | 0.7951647   | 0.538288404 | -0.256876296 | 0.38589275 | 0.583832377 |
| Rps25      | 12  | 1.018009768 | 0.986489045 | -0.031520723 | 0.38645847 | 0.584628001 |
| Zbtb41     | 67  | 0.916890405 | 1.207455958 | 0.290565553  | 0.38654052 | 0.584691851 |
| Zbtb21     | 34  | 0.800411278 | 0.750205162 | -0.050206116 | 0.38660059 | 0.584722432 |
| Slc19a2    | 69  | 1.520380739 | 1.653792269 | 0.13341153   | 0.38706462 | 0.585363937 |
| Pygo2      | 60  | 1.327469037 | 1.320373703 | -0.007095334 | 0.38720084 | 0.585509595 |
| Ndufaf1    | 6   | 3.835252846 | 4.862060302 | 1.026807455  | 0.38752911 | 0.585945613 |
| Klhl22     | 43  | 1.114626502 | 1.030718858 | -0.083907644 | 0.38759336 | 0.585982385 |
| Rufy1      | 67  | 0.928247932 | 0.925884327 | -0.002363605 | 0.38773421 | 0.586134932 |
| Tmem194    | 38  | 0.796668677 | 0.797594057 | 0.00092538   | 0.3878337  | 0.58622494  |
| Mtag2      | 51  | 2.91684912  | 2.951388835 | 0.034539716  | 0.38798995 | 0.586400708 |
| Sarm1      | 31  | 10.5698513  | 10.06781072 | -0.502040577 | 0.38812688 | 0.586497032 |
| Kctd21     | 21  | 1.418553232 | 1.706105834 | 0.287552602  | 0.38813362 | 0.586497032 |
| Dedd       | 49  | 1.389927513 | 1.555848168 | 0.165920656  | 0.38838022 | 0.586628027 |
| Syng4      | 10  | 1.596121101 | 0.784611063 | -0.811510039 | 0.38836236 | 0.586628027 |
| Rab5c      | 15  | 1.092129087 | 0.958802687 | -0.1333264   | 0.38835247 | 0.586628027 |
| Myo9b      | 39  | 1.023022881 | 0.818125788 | -0.204897093 | 0.38833628 | 0.586628027 |
| Hoxb6      | 7   | 8.961941518 | 9.208177267 | 0.246235749  | 0.38846105 | 0.586689727 |
| Dido1      | 60  | 1.884020244 | 2.161624746 | 0.277604503  | 0.3886178  | 0.586866072 |

|            |     |             |             |              |            |             |
|------------|-----|-------------|-------------|--------------|------------|-------------|
| Pag1       | 34  | 2.586116741 | 2.829821583 | 0.243704842  | 0.38868427 | 0.586906045 |
| Ipo13      | 67  | 1.508111502 | 1.525498276 | 0.017386774  | 0.38886564 | 0.587036903 |
| Csnk2a1    | 13  | 1.42131631  | 0.991243688 | -0.430072622 | 0.38892844 | 0.587036903 |
| Tcp1       | 23  | 1.313009333 | 0.968888428 | -0.344120905 | 0.38901096 | 0.587036903 |
| Sema6d     | 99  | 15.63600247 | 16.25830201 | 0.622299548  | 0.38897739 | 0.587036903 |
| Smad2      | 184 | 1.076688324 | 1.048982805 | -0.027705519 | 0.38894105 | 0.587036903 |
| Txnrd2     | 34  | 1.038479511 | 1.155606963 | 0.117127451  | 0.38892172 | 0.587036903 |
| Fev        | 16  | 12.63506197 | 13.12526989 | 0.490207919  | 0.38910437 | 0.587117491 |
| 10408A11F  | 42  | 1.287258913 | 1.678262574 | 0.391003661  | 0.38920469 | 0.587208479 |
| Pqlc2      | 28  | 1.875354767 | 1.901581014 | 0.026226247  | 0.38958672 | 0.587631751 |
| Ube2m      | 72  | 1.201312807 | 1.008875136 | -0.192437671 | 0.38968547 | 0.587631751 |
| Tm9sf3     | 100 | 1.367921372 | 1.277920717 | -0.090000655 | 0.38968162 | 0.587631751 |
| Myeov2     | 6   | 0.28038751  | 0.816200267 | 0.535812757  | 0.38961009 | 0.587631751 |
| Oas1c      | 7   | 2.201032213 | 1.742398856 | -0.458633357 | 0.38959139 | 0.587631751 |
| Dph1       | 12  | 2.528471151 | 1.676050761 | -0.852420391 | 0.39002159 | 0.588017756 |
| Sec24a     | 39  | 5.7703066   | 4.948249563 | -0.822057037 | 0.38998753 | 0.588017756 |
| Npl        | 4   | 11.31835771 | 13.38170427 | 2.063346559  | 0.39038164 | 0.58850012  |
| Plag1      | 23  | 1.176070293 | 1.205043884 | 0.028973591  | 0.39050243 | 0.588621736 |
| Mrps7      | 45  | 0.815668943 | 1.028233092 | 0.212564149  | 0.39074057 | 0.588719904 |
| Sec61a2    | 5   | 0.333354026 | 0.733570131 | 0.400216105  | 0.39076815 | 0.588719904 |
| Vamp3      | 65  | 1.018670327 | 0.88780207  | -0.130868257 | 0.3907376  | 0.588719904 |
| Nudc       | 8   | 0.213675214 | 1           | 0.786324786  | 0.39070694 | 0.588719904 |
| Tpk1       | 36  | 1.343011531 | 1.115747396 | -0.227264135 | 0.39061389 | 0.588719904 |
| Atp1a3     | 33  | 11.57591533 | 12.59285693 | 1.016941594  | 0.39101253 | 0.589027594 |
| Itgb7      | 1   | 7.352941176 | 9.826589595 | 2.473648419  | 0.39143415 | 0.589602202 |
| Stub1      | 58  | 1.578014412 | 1.392958156 | -0.185056256 | 0.39150396 | 0.589646832 |
| Mrpl34     | 21  | 1.822405156 | 1.473399688 | -0.349005468 | 0.39163205 | 0.589779213 |
| Hipk3      | 102 | 1.419011842 | 1.376466529 | -0.042545313 | 0.39203691 | 0.590328338 |
| 130033K04F | 6   | 2.951883089 | 2.768929194 | -0.182953894 | 0.39211722 | 0.590388688 |
| 133404O12F | 27  | 1.449109561 | 1.286058742 | -0.163050819 | 0.39225022 | 0.590528338 |
| Zik1       | 8   | 1.62477876  | 0.86447024  | -0.76030852  | 0.39259934 | 0.590811479 |
| Dctpp1     | 17  | 0.850112187 | 1.36713645  | 0.517024263  | 0.39256127 | 0.590811479 |
| Styxl1     | 37  | 1.895648248 | 2.132979476 | 0.237331228  | 0.39248201 | 0.590811479 |
| Edem3      | 65  | 1.318125358 | 1.417029783 | 0.098904425  | 0.3925321  | 0.590811479 |

|            |     |             |             |              |            |             |
|------------|-----|-------------|-------------|--------------|------------|-------------|
| Twf2       | 45  | 1.236574358 | 1.193109257 | -0.043465101 | 0.39270301 | 0.590906893 |
| Pde4b      | 3   | 1.703163017 | 3.205128205 | 1.501965188  | 0.39282632 | 0.591031825 |
| Degs1      | 52  | 1.449463568 | 1.085463577 | -0.363999991 | 0.39287122 | 0.591038787 |
| Rpl34      | 20  | 0.955312418 | 0.797573594 | -0.157738824 | 0.39304223 | 0.59105366  |
| Map3k6     | 42  | 1.382445992 | 1.107043062 | -0.27540293  | 0.3929981  | 0.59105366  |
| Fam13b     | 112 | 1.098617384 | 1.001429023 | -0.097188361 | 0.39303087 | 0.59105366  |
| Crebl2     | 29  | 1.208874883 | 1.066837308 | -0.142037575 | 0.39297408 | 0.59105366  |
| Sars2      | 24  | 1.439442977 | 1.549241858 | 0.109798881  | 0.39311152 | 0.591097282 |
| Las1l      | 11  | 23.2352765  | 25.03043297 | 1.795156472  | 0.39323122 | 0.591216689 |
| Osbpl5     | 29  | 2.575256307 | 2.1467639   | -0.428492408 | 0.39333777 | 0.591316298 |
| Trmt11     | 35  | 1.5562932   | 1.43346411  | -0.12282909  | 0.3935079  | 0.59151147  |
| Cnot10     | 30  | 1.259854024 | 1.313652743 | 0.05379872   | 0.39366364 | 0.591684953 |
| DC10050349 | 8   | 1.355390641 | 1.986274814 | 0.630884173  | 0.39375977 | 0.591708225 |
| Acot7      | 82  | 1.286313204 | 1.24386386  | -0.042449344 | 0.39374041 | 0.591708225 |
| Ap5m1      | 56  | 1.05034921  | 1.047611074 | -0.002738137 | 0.39398477 | 0.591985711 |
| Agps       | 69  | 1.21773361  | 0.849825447 | -0.367908164 | 0.39414025 | 0.592158695 |
| Slc39a9    | 20  | 1.726566314 | 1.831036873 | 0.104470559  | 0.39438633 | 0.592467751 |
| 30024E05F  | 24  | 1.250572135 | 1.089425248 | -0.161146887 | 0.39451219 | 0.592596154 |
| 30046D13F  | 11  | 0.69842223  | 0.529436322 | -0.168985908 | 0.39469692 | 0.592812964 |
| Gpank1     | 21  | 1.084461228 | 0.943137921 | -0.141323308 | 0.39478906 | 0.592890669 |
| 00076A07F  | 21  | 0.712516506 | 1.219737427 | 0.507220921  | 0.39508245 | 0.593218436 |
| Creld2     | 77  | 1.528797518 | 1.589832886 | 0.061035368  | 0.39508817 | 0.593218436 |
| Aldoc      | 3   | 91.83230826 | 91.0285144  | -0.803793854 | 0.39517063 | 0.593281542 |
| Etfdh      | 15  | 1.138085965 | 1.293738127 | 0.155652162  | 0.39535138 | 0.593370785 |
| Actr8      | 13  | 1.676887543 | 1.854471254 | 0.177583711  | 0.39530561 | 0.593370785 |
| Arid2      | 208 | 1.277321312 | 1.212831396 | -0.064489916 | 0.39534854 | 0.593370785 |
| Zfp869     | 12  | 2.027267463 | 1.471085792 | -0.556181671 | 0.39540601 | 0.593392088 |
| Pigq       | 49  | 1.222838619 | 1.201272466 | -0.021566153 | 0.39546291 | 0.593416784 |
| Cdc42      | 83  | 1.570647012 | 1.303472809 | -0.267174203 | 0.39550801 | 0.593423774 |
| Mrpl27     | 8   | 2.15512801  | 2.314081325 | 0.158953315  | 0.39557999 | 0.593471092 |
| Hp1bp3     | 161 | 1.284106499 | 1.166637451 | -0.117469049 | 0.39564872 | 0.593513525 |
| Ldlrad4    | 107 | 1.663111559 | 1.417102938 | -0.246008622 | 0.39580897 | 0.593637691 |
| Rpl38      | 42  | 1.462849026 | 1.537928101 | 0.075079075  | 0.39583858 | 0.593637691 |
| R3hdm1     | 27  | 1.010880313 | 1.238541246 | 0.227660933  | 0.39585286 | 0.593637691 |



|            |     |             |             |              |            |             |
|------------|-----|-------------|-------------|--------------|------------|-------------|
| Spint2     | 45  | 1.624987056 | 1.312250758 | -0.312736298 | 0.39590444 | 0.593654381 |
| Msantd2    | 112 | 1.362053053 | 1.469925438 | 0.107872385  | 0.39599865 | 0.593734974 |
| Stard13    | 9   | 3.629730485 | 3.129988964 | -0.499741521 | 0.39605183 | 0.593754039 |
| Jdp2       | 79  | 1.481808537 | 1.477749711 | -0.004058826 | 0.3962715  | 0.593961995 |
| Ap3s1      | 80  | 0.957851396 | 1.044026732 | 0.086175335  | 0.39623437 | 0.593961995 |
| Tgoln2     | 8   | 0.501013856 | 1.107346134 | 0.606332278  | 0.39642027 | 0.594124298 |
| Tulp3      | 6   | 1.876601486 | 0.822555507 | -1.054045978 | 0.3967239  | 0.594457925 |
| Lonp1      | 28  | 1.770927813 | 1.117071119 | -0.653856694 | 0.39671333 | 0.594457925 |
| Tbc1d8     | 71  | 1.468164058 | 1.321017146 | -0.147146913 | 0.39684426 | 0.594577568 |
| Rwdd4a     | 50  | 1.312510285 | 1.419776265 | 0.10726598   | 0.39704005 | 0.594810177 |
| Coa7       | 15  | 1.73145193  | 1.392218353 | -0.339233577 | 0.39733368 | 0.595128557 |
| Vps37d     | 57  | 2.184674041 | 2.328259097 | 0.143585056  | 0.39732954 | 0.595128557 |
| Supt20     | 16  | 0.891493056 | 0.873387372 | -0.018105683 | 0.39746799 | 0.595268959 |
| Plekhh2    | 61  | 1.626523267 | 1.564166161 | -0.062357106 | 0.39751029 | 0.595271554 |
| Ccndbp1    | 25  | 1.526068321 | 1.403110352 | -0.122957969 | 0.39765684 | 0.595430253 |
| Pitrm1     | 4   | 4.339774623 | 4.318186839 | -0.021587784 | 0.3976989  | 0.595432476 |
| Stpg1      | 16  | 54.36338266 | 51.9931435  | -2.370239166 | 0.39785064 | 0.595598881 |
| Ehbp1      | 19  | 1.592296098 | 1.279525488 | -0.31277061  | 0.39796048 | 0.59560824  |
| Prpf38b    | 59  | 1.23834481  | 1.062521603 | -0.175823207 | 0.39794445 | 0.59560824  |
| Hcar2      | 8   | 91.68122841 | 91.88687204 | 0.205643633  | 0.39797866 | 0.59560824  |
| Rab21      | 82  | 1.534664159 | 1.467497551 | -0.067166608 | 0.39806725 | 0.595619333 |
| Mir7655    | 32  | 1.199731294 | 1.480872617 | 0.281141323  | 0.39805038 | 0.595619333 |
| Nisch      | 12  | 0.520639057 | 0.918549064 | 0.397910007  | 0.39814271 | 0.595671505 |
| Tigar      | 43  | 1.691391217 | 1.446220453 | -0.245170763 | 0.39831408 | 0.595867138 |
| Mcm10      | 23  | 2.108901052 | 1.523012824 | -0.585888228 | 0.39842144 | 0.595936592 |
| Tslp       | 4   | 11.84517497 | 11.49294405 | -0.352230927 | 0.39844173 | 0.595936592 |
| Kat5       | 30  | 2.079933922 | 1.664452306 | -0.415481616 | 0.39849423 | 0.595954375 |
| Rbm5       | 9   | 1.457487072 | 1.276226417 | -0.181260654 | 0.3986727  | 0.596099776 |
| Itpripl1   | 19  | 2.038475802 | 1.07306068  | -0.965415122 | 0.39866493 | 0.596099776 |
| .10040N11F | 15  | 0.754464226 | 0.991505922 | 0.237041696  | 0.39883104 | 0.596275764 |
| Gabarap    | 23  | 1.236468073 | 1.242674912 | 0.006206839  | 0.39894826 | 0.596390257 |
| Gulo       | 2   | 4.268292683 | 4.117647059 | -0.150645624 | 0.39901969 | 0.59643628  |
| Anxa4      | 24  | 1.515949343 | 1.291336915 | -0.224612428 | 0.3991624  | 0.596588827 |
| Masp1      | 3   | 9.852052709 | 10.75074019 | 0.898687477  | 0.39924619 | 0.596653284 |

|            |     |             |             |              |            |             |
|------------|-----|-------------|-------------|--------------|------------|-------------|
| Cml1       | 8   | 1.740797653 | 2.179974706 | 0.439177053  | 0.39942878 | 0.596865364 |
| Zfp598     | 73  | 1.22912652  | 0.899586888 | -0.329539632 | 0.39968899 | 0.597193378 |
| Mir7677    | 13  | 90.19894044 | 90.26613315 | 0.067192713  | 0.4002061  | 0.597905148 |
| Slc19a1    | 11  | 3.103764322 | 2.858360879 | -0.245403443 | 0.40032841 | 0.598026984 |
| Ptk2b      | 16  | 2.548713108 | 2.301539557 | -0.247173552 | 0.40050046 | 0.598223098 |
| Tmem42     | 65  | 1.088113456 | 0.961976219 | -0.126137238 | 0.40060711 | 0.598321504 |
| Tomm7      | 5   | 0.853174603 | 1.267025447 | 0.413850844  | 0.40068142 | 0.598371584 |
| Dpy30      | 2   | 0           | 0.833333333 | 0.833333333  | 0.40088091 | 0.598608573 |
| Faf1       | 82  | 1.1185137   | 1.199699016 | 0.081185316  | 0.40103484 | 0.598777498 |
| Stkld1     | 9   | 2.138078978 | 1.527508362 | -0.610570616 | 0.40112648 | 0.598853392 |
| Dnaja2     | 98  | 1.213993243 | 1.206487411 | -0.007505832 | 0.40121417 | 0.598915799 |
| Hspbap1    | 35  | 0.985432634 | 1.130237213 | 0.144804579  | 0.40124991 | 0.598915799 |
| Lamp1      | 47  | 1.384597413 | 1.398177675 | 0.013580261  | 0.40133277 | 0.59897855  |
| Mrps25     | 16  | 1.283987606 | 1.260915399 | -0.023072207 | 0.40164419 | 0.599382371 |
| Spink10    | 4   | 1.767676768 | 0.531914894 | -1.235761874 | 0.40174488 | 0.599428459 |
| Fbxl4      | 49  | 1.089559476 | 1.093313805 | 0.003754328  | 0.40177792 | 0.599428459 |
| Ube2v1     | 86  | 1.224573932 | 1.248369823 | 0.02379589   | 0.4018235  | 0.599428459 |
| Specc1l    | 62  | 1.156890158 | 1.159185589 | 0.002295431  | 0.40183847 | 0.599428459 |
| Zfp846     | 17  | 1.382870757 | 1.051789599 | -0.331081157 | 0.4024962  | 0.600348577 |
| 330009J07R | 76  | 1.370314005 | 1.341313155 | -0.02900085  | 0.40274621 | 0.600599386 |
| Cenpa      | 26  | 1.528113195 | 1.349498332 | -0.178614863 | 0.40273955 | 0.600599386 |
| Amdhd2     | 22  | 0.879820646 | 1.053865415 | 0.174044769  | 0.40298188 | 0.600825628 |
| Ppme1      | 31  | 1.42860306  | 1.658761044 | 0.230157984  | 0.40299384 | 0.600825628 |
| Lmln       | 67  | 1.221389226 | 1.067315125 | -0.154074101 | 0.40302076 | 0.600825628 |
| Gm10548    | 14  | 1.403144757 | 1.253836264 | -0.149308493 | 0.40311189 | 0.600900434 |
| Lrrc32     | 1   | 17.17171717 | 21.97802198 | 4.806304806  | 0.40342247 | 0.601119142 |
| Pcsk4      | 8   | 5.194339252 | 4.440360142 | -0.75397911  | 0.40333754 | 0.601119142 |
| 700027F06F | 2   | 47.85714286 | 42.89215686 | -4.964985994 | 0.40338746 | 0.601119142 |
| Ankrd10    | 76  | 1.810890625 | 1.57110003  | -0.239790595 | 0.40339882 | 0.601119142 |
| Sra1       | 19  | 2.112102079 | 1.728121017 | -0.383981062 | 0.40377577 | 0.601584496 |
| Usp25      | 71  | 0.969351606 | 0.971729404 | 0.002377798  | 0.40399792 | 0.601792119 |
| 700029J07R | 11  | 2.150169688 | 1.529588712 | -0.620580977 | 0.40412018 | 0.601792119 |
| Susd6      | 63  | 1.174909751 | 1.112214861 | -0.06269489  | 0.40410897 | 0.601792119 |
| Usp12      | 124 | 1.108605842 | 1.163954822 | 0.055348979  | 0.40404591 | 0.601792119 |

|            |     |             |             |              |            |             |
|------------|-----|-------------|-------------|--------------|------------|-------------|
| Dnajc12    | 12  | 3.102617666 | 2.096864686 | -1.005752979 | 0.40410209 | 0.601792119 |
| Numbl      | 66  | 1.724961124 | 1.632226578 | -0.092734546 | 0.40437176 | 0.602044565 |
| Gm4285     | 60  | 1.054079828 | 1.096720168 | 0.04264034   | 0.40435389 | 0.602044565 |
| Etv4       | 12  | 1.502976233 | 1.592955396 | 0.089979163  | 0.40453762 | 0.602230402 |
| Pprc1      | 67  | 1.54700005  | 1.353435257 | -0.193564793 | 0.4048094  | 0.602512745 |
| Unc5b      | 82  | 1.147371297 | 1.043136798 | -0.104234499 | 0.40479143 | 0.602512745 |
| Prpf40a    | 66  | 1.593185967 | 1.489933357 | -0.10325261  | 0.40486372 | 0.602532482 |
| Fbxw8      | 50  | 1.177421226 | 1.176177345 | -0.001243881 | 0.40496614 | 0.602623789 |
| 3-1190005i | 4   | 0.390625    | 0           | -0.390625    | 0.40509334 | 0.602751946 |
| Slamf8     | 2   | 9.674266274 | 11.30415162 | 1.629885351  | 0.40524476 | 0.602916105 |
| Ppia       | 86  | 1.120880708 | 1.095741907 | -0.025138801 | 0.40536841 | 0.603038936 |
| Ccnb2      | 32  | 1.120407771 | 1.523982914 | 0.403575143  | 0.40541639 | 0.603049177 |
| Nfrkb      | 55  | 1.284692304 | 1.138150587 | -0.146541717 | 0.4056666  | 0.603360202 |
| Snapc3     | 45  | 1.299039513 | 1.35428768  | 0.055248167  | 0.40575284 | 0.603400016 |
| Dld        | 30  | 1.291265882 | 1.599860976 | 0.308595094  | 0.40581673 | 0.603400016 |
| Fzr1       | 43  | 1.518585642 | 1.210517527 | -0.308068116 | 0.40579581 | 0.603400016 |
| Zfp451     | 71  | 0.986735374 | 1.138524131 | 0.151788757  | 0.40603912 | 0.603669503 |
| Prpf6      | 34  | 1.538889039 | 1.241495108 | -0.297393931 | 0.40617506 | 0.603688122 |
| Smpd3      | 27  | 0.9998206   | 0.728904148 | -0.270916451 | 0.40616897 | 0.603688122 |
| Rpap3      | 25  | 1.633674389 | 1.408252639 | -0.22542175  | 0.40614344 | 0.603688122 |
| Skap2      | 43  | 1.332616858 | 1.519564106 | 0.186947248  | 0.40623929 | 0.603722435 |
| Fdxr       | 3   | 0.82815735  | 0.199600798 | -0.628556551 | 0.40633543 | 0.603804164 |
| Hnrnpa2b1  | 81  | 1.28850123  | 1.112034589 | -0.176466641 | 0.40646411 | 0.603811947 |
| Aaas       | 28  | 1.4541176   | 1.446298892 | -0.007818708 | 0.40639562 | 0.603811947 |
| Fam49b     | 107 | 1.42201754  | 1.246536189 | -0.175481351 | 0.40645275 | 0.603811947 |
| Map3k3     | 95  | 1.262923421 | 1.237786255 | -0.025137166 | 0.40656257 | 0.603897068 |
| Bcl2l11    | 166 | 1.527763837 | 1.31416516  | -0.213598676 | 0.40665665 | 0.603974831 |
| 30415F09F  | 35  | 1.236387626 | 1.066991318 | -0.169396308 | 0.40669724 | 0.603974831 |
| Platr8     | 6   | 87.9405041  | 85.87948918 | -2.061014924 | 0.40723569 | 0.604713261 |
| Mir7219    | 1   | 97.5        | 95.19230769 | -2.307692308 | 0.40741961 | 0.604828606 |
| Wdr27      | 25  | 1.442761889 | 1.446238378 | 0.003476489  | 0.40743702 | 0.604828606 |
| Slc25a51   | 36  | 0.867655865 | 0.951152817 | 0.083496952  | 0.40743004 | 0.604828606 |
| Uqcr11     | 10  | 1.468355349 | 1.490069801 | 0.021714452  | 0.40774414 | 0.604978512 |
| Trappc3    | 31  | 3.039307572 | 2.977959892 | -0.06134768  | 0.40766637 | 0.604978512 |

|            |     |             |             |              |            |             |
|------------|-----|-------------|-------------|--------------|------------|-------------|
| Dars       | 22  | 0.731085647 | 0.88396946  | 0.152883813  | 0.40770299 | 0.604978512 |
| Rbpms      | 80  | 1.378564626 | 1.100819387 | -0.27774524  | 0.40773146 | 0.604978512 |
| Preb       | 45  | 2.577261201 | 2.697290874 | 0.120029674  | 0.40760802 | 0.604978512 |
| C2cd5      | 47  | 1.366959302 | 1.329467728 | -0.037491574 | 0.40793412 | 0.605199205 |
| Zbtb11os1  | 46  | 1.298163649 | 1.401126499 | 0.102962849  | 0.40800468 | 0.605242693 |
| Syvn1      | 70  | 1.158902979 | 1.139105641 | -0.019797338 | 0.40819242 | 0.60539878  |
| 333439L19F | 32  | 1.649053316 | 1.281711179 | -0.367341526 | 0.40815391 | 0.60539878  |
| Zfp862-ps  | 7   | 2.048820966 | 1.673332424 | -0.375488542 | 0.40831456 | 0.605518732 |
| Snx12      | 2   | 25.11995571 | 22.66003707 | -2.45991864  | 0.40860241 | 0.605838414 |
| Lrrc48     | 7   | 3.405808884 | 2.519011586 | -0.886797298 | 0.4086127  | 0.605838414 |
| Mbd1       | 42  | 1.101329487 | 1.391751338 | 0.29042185   | 0.40872653 | 0.605945966 |
| Pnir       | 7   | 2.253979159 | 1.716875273 | -0.537103886 | 0.40879155 | 0.605981122 |
| Tbc1d10a   | 30  | 1.556647356 | 0.933510977 | -0.62313638  | 0.40893898 | 0.606138451 |
| Sgsm2      | 108 | 1.174376381 | 1.21664847  | 0.042272089  | 0.40911735 | 0.606341581 |
| Pom121     | 84  | 4.942210828 | 4.89643104  | -0.045779789 | 0.4092073  | 0.606413641 |
| Kdm5b      | 44  | 1.813690353 | 1.683272434 | -0.130417919 | 0.40926499 | 0.606437895 |
| Mettl4     | 10  | 1.789372762 | 1.282217273 | -0.507155489 | 0.40945061 | 0.60659044  |
| '00099C18F | 10  | 1.789372762 | 1.282217273 | -0.507155489 | 0.40945061 | 0.60659044  |
| Zfp322a    | 51  | 1.11537464  | 1.077677241 | -0.037697399 | 0.40983248 | 0.606972333 |
| Glcci1     | 77  | 0.985646918 | 0.766746235 | -0.218900683 | 0.40981816 | 0.606972333 |
| Desi1      | 31  | 1.839587222 | 1.252210649 | -0.587376573 | 0.40978318 | 0.606972333 |
| Zfp57      | 8   | 1.470972722 | 1.705259263 | 0.234286541  | 0.40994817 | 0.6070824   |
| 30070E04F  | 6   | 16.49184149 | 18.63734679 | 2.1455053    | 0.41015586 | 0.607326872 |
| Gtf3a      | 12  | 1.144271774 | 0.705656264 | -0.438615509 | 0.41019604 | 0.607326872 |
| Tm2d1      | 39  | 1.565424998 | 1.613840968 | 0.04841597   | 0.41024258 | 0.607334498 |
| Setd3      | 106 | 1.072033215 | 0.979267559 | -0.092765657 | 0.41055759 | 0.607739538 |
| Cdr2l      | 62  | 1.905986659 | 1.888366932 | -0.017619727 | 0.41069395 | 0.607880076 |
| 31425E22F  | 12  | 1.183047649 | 1.262942948 | 0.079895299  | 0.41083748 | 0.608031187 |
| Sqle       | 65  | 1.142024105 | 1.210647338 | 0.068623233  | 0.41095703 | 0.608118486 |
| Ctdp1      | 87  | 1.110709788 | 1.048565291 | -0.062144497 | 0.41097935 | 0.608118486 |
| Zdhhc4     | 42  | 1.90263428  | 1.70304979  | -0.19958449  | 0.41102536 | 0.608125236 |
| Eya3       | 28  | 1.300679529 | 1.154668175 | -0.146011355 | 0.41114639 | 0.608136725 |
| Pfn3       | 4   | 43.85157676 | 43.41309752 | -0.438479249 | 0.41114913 | 0.608136725 |
| Mir6391    | 9   | 92.1910448  | 93.50382138 | 1.312776574  | 0.41115745 | 0.608136725 |

|           |     |             |             |              |            |             |
|-----------|-----|-------------|-------------|--------------|------------|-------------|
| Cpsf6     | 57  | 1.033217128 | 0.780733175 | -0.252483953 | 0.41151898 | 0.608610104 |
| Rbks      | 47  | 1.093244295 | 0.979752696 | -0.1134916   | 0.4115993  | 0.608667556 |
| Smad1     | 73  | 1.234921685 | 1.422102401 | 0.187180716  | 0.4116721  | 0.608713858 |
| Acbd3     | 60  | 1.16466633  | 0.804085401 | -0.360580929 | 0.41202362 | 0.609033242 |
| Kpna4     | 112 | 1.186244998 | 1.056221698 | -0.1300233   | 0.41204285 | 0.609033242 |
| 30112J17R | 4   | 16.69588431 | 15.42536898 | -1.270515336 | 0.41197626 | 0.609033242 |
| Chd4      | 77  | 1.836725889 | 1.439964291 | -0.396761598 | 0.41205411 | 0.609033242 |
| Pcbd1     | 5   | 0.888888889 | 0.753052917 | -0.135835972 | 0.412228   | 0.609228891 |
| Plekhg2   | 44  | 1.412688329 | 1.424838724 | 0.012150395  | 0.41242519 | 0.609458938 |
| Rnf223    | 2   | 96.67967226 | 97.98316498 | 1.303492724  | 0.41261851 | 0.609639907 |
| Rock2     | 115 | 1.056941249 | 1.032320807 | -0.024620442 | 0.41263075 | 0.609639907 |
| Ubtd2     | 95  | 1.840763053 | 1.886538819 | 0.045775766  | 0.41286957 | 0.60993135  |
| Gpatch4   | 21  | 1.225437032 | 1.207306769 | -0.018130263 | 0.41313732 | 0.610172342 |
| Mut       | 9   | 0.961587335 | 0.729912316 | -0.231675019 | 0.41315745 | 0.610172342 |
| Pvt1      | 13  | 0.871799343 | 0.712120241 | -0.159679103 | 0.41310317 | 0.610172342 |
| Zbed4     | 135 | 1.191024811 | 1.280241178 | 0.089216367  | 0.41331319 | 0.610340923 |
| Zfp212    | 32  | 1.138243077 | 0.983003287 | -0.15523979  | 0.41340098 | 0.610362756 |
| Decr1     | 21  | 1.646585357 | 1.326102172 | -0.320483185 | 0.41341117 | 0.610362756 |
| Mapre3    | 46  | 1.90629244  | 1.921416068 | 0.015123628  | 0.41382426 | 0.610905326 |
| Prorsd1   | 21  | 2.975312187 | 2.626775801 | -0.348536386 | 0.41386192 | 0.610905326 |
| Phykpl    | 20  | 1.128211391 | 0.769782603 | -0.358428789 | 0.41390375 | 0.610905612 |
| Peak1     | 56  | 1.379119892 | 1.070404466 | -0.308715426 | 0.41424044 | 0.611279581 |
| Tnfrsf10b | 16  | 0.814329802 | 0.978719652 | 0.16438985   | 0.41423596 | 0.611279581 |
| Pomt1     | 26  | 1.258303636 | 0.920513247 | -0.337790389 | 0.41433478 | 0.611357319 |
| Brpf1     | 53  | 1.156503814 | 1.130164813 | -0.026339    | 0.41456882 | 0.611641155 |
| Rif1      | 84  | 1.161100187 | 1.188533142 | 0.027432955  | 0.41484685 | 0.611989812 |
| Ints12    | 37  | 1.072210253 | 1.129605553 | 0.0573953    | 0.41511913 | 0.612329922 |
| Smap1     | 125 | 1.027282666 | 1.019304126 | -0.007978539 | 0.41532266 | 0.612568569 |
| Spopl     | 44  | 1.499069855 | 1.430454494 | -0.068615361 | 0.41539669 | 0.612616177 |
| Hmgxb4    | 73  | 1.171249035 | 1.166521038 | -0.004727997 | 0.41580841 | 0.613161755 |
| 30037D09F | 25  | 2.075910993 | 1.794263855 | -0.281647138 | 0.41585578 | 0.613169984 |
| Htr3a     | 5   | 4.364241803 | 5.197108107 | 0.832866304  | 0.41592523 | 0.613210771 |
| Prmt5     | 10  | 0.706333544 | 0.76167599  | 0.055342446  | 0.41604792 | 0.613330034 |
| Snx21     | 76  | 1.337581811 | 1.213669738 | -0.123912073 | 0.41619059 | 0.613478719 |

|            |     |             |             |              |            |             |
|------------|-----|-------------|-------------|--------------|------------|-------------|
| Clmn       | 50  | 1.596028703 | 1.637102424 | 0.041073721  | 0.41628285 | 0.613553083 |
| Neat1      | 20  | 1.450806097 | 1.870587727 | 0.41978163   | 0.41671335 | 0.614125908 |
| Dtx3       | 35  | 2.400284431 | 2.36562942  | -0.034655011 | 0.41685612 | 0.614263209 |
| Ewsr1      | 43  | 0.930487178 | 0.966375528 | 0.035888351  | 0.41689023 | 0.614263209 |
| Rhoa       | 30  | 1.779820347 | 1.425293275 | -0.354527072 | 0.41700936 | 0.614377048 |
| Hnrnpc     | 12  | 1.873032414 | 1.087457157 | -0.785575257 | 0.41718981 | 0.614581194 |
| 310011J03R | 16  | 0.988954053 | 1.428379046 | 0.439424993  | 0.41740564 | 0.614837418 |
| Immp2l     | 42  | 1.387013386 | 1.140268828 | -0.246744559 | 0.41750653 | 0.61486259  |
| Sik3       | 98  | 1.316451661 | 1.505572059 | 0.189120398  | 0.41750007 | 0.61486259  |
| Urgcp      | 78  | 1.361271588 | 1.405596041 | 0.044324453  | 0.41781675 | 0.615195964 |
| Nfx1       | 52  | 1.055027923 | 1.081955771 | 0.026927848  | 0.41778085 | 0.615195964 |
| Gm10421    | 6   | 60.00199243 | 60.6069479  | 0.604955474  | 0.41805495 | 0.615278417 |
| Polr1d     | 30  | 1.520475376 | 1.579788094 | 0.059312717  | 0.41801201 | 0.615278417 |
| Hist1h1b   | 30  | 1.515968422 | 1.617932245 | 0.101963823  | 0.41804792 | 0.615278417 |
| Micu2      | 46  | 3.34231571  | 3.386760481 | 0.044444772  | 0.41806495 | 0.615278417 |
| Ptp4a2     | 123 | 1.263077796 | 1.043074961 | -0.220002835 | 0.4180824  | 0.615278417 |
| 30016D10F  | 74  | 1.161856192 | 1.140552481 | -0.021303711 | 0.41834786 | 0.615607353 |
| C1qbp      | 26  | 1.26313818  | 1.587533656 | 0.324395477  | 0.41839613 | 0.615616652 |
| Slc33a1    | 38  | 1.200227785 | 0.983900991 | -0.216326794 | 0.41867876 | 0.615970743 |
| Fam160a2   | 36  | 0.82512552  | 0.763238568 | -0.061886952 | 0.41873683 | 0.615994404 |
| Dnali1     | 15  | 3.710443406 | 3.030754729 | -0.679688677 | 0.41895206 | 0.616230754 |
| Znf512b    | 77  | 1.427905432 | 1.293244813 | -0.134660619 | 0.41898148 | 0.616230754 |
| Sirt3      | 52  | 1.489641059 | 1.251406756 | -0.238234303 | 0.41910474 | 0.616285053 |
| Zfpl1      | 19  | 1.020413495 | 1.098186057 | 0.077772563  | 0.41914439 | 0.616285053 |
| Prlhr      | 2   | 70.31479667 | 73.03161048 | 2.716813812  | 0.41912704 | 0.616285053 |
| Cmtm8      | 54  | 6.08959042  | 7.005004765 | 0.915414345  | 0.41918958 | 0.616289737 |
| Otx2       | 26  | 45.98456997 | 45.59013559 | -0.394434382 | 0.4192906  | 0.616376497 |
| Pank4      | 64  | 1.127445043 | 1.065478347 | -0.061966697 | 0.41942697 | 0.616505186 |
| Nfya       | 58  | 1.259682285 | 1.104135807 | -0.155546477 | 0.41946216 | 0.616505186 |
| Emc7       | 36  | 1.29321819  | 1.329405052 | 0.036186862  | 0.41960723 | 0.616656635 |
| Lmbr1l     | 46  | 1.491442435 | 1.427868942 | -0.063573492 | 0.4196979  | 0.616728124 |
| Caprin1    | 80  | 1.005189674 | 1.163113462 | 0.157923788  | 0.41974226 | 0.616731538 |
| Gm16062    | 3   | 3.597342425 | 2.057343623 | -1.539998802 | 0.4198587  | 0.616840863 |
| Dmtf1      | 71  | 1.290089465 | 1.3702039   | 0.080114435  | 0.42011486 | 0.61715541  |

|            |    |             |             |              |            |             |
|------------|----|-------------|-------------|--------------|------------|-------------|
| Disp2      | 9  | 1.731657697 | 1.803792752 | 0.072135055  | 0.42044166 | 0.617573666 |
| Trp53inp1  | 57 | 1.160070494 | 1.398591004 | 0.23852051   | 0.4205091  | 0.6176109   |
| Mppe1      | 37 | 1.408115799 | 1.015118157 | -0.392997641 | 0.42071224 | 0.617785591 |
| Fam98c     | 44 | 1.391064658 | 1.371676271 | -0.019388387 | 0.42068852 | 0.617785591 |
| Nrp2       | 39 | 1.577705007 | 1.387887583 | -0.189817425 | 0.42080902 | 0.617865875 |
| Zfp281     | 88 | 1.054611323 | 0.990079438 | -0.064531885 | 0.42104993 | 0.61815775  |
| Fdps       | 10 | 2.26846825  | 2.146691211 | -0.121777039 | 0.4213065  | 0.61847255  |
| Slc12a4    | 84 | 1.208944854 | 1.187070455 | -0.0218744   | 0.42141214 | 0.618499686 |
| Tmem126b   | 22 | 1.354602168 | 1.622437849 | 0.26783568   | 0.4214283  | 0.618499686 |
| Sgms1      | 98 | 1.297268073 | 1.386437046 | 0.089168973  | 0.42145143 | 0.618499686 |
| Arpc1a     | 35 | 1.720999032 | 1.517360789 | -0.203638242 | 0.42152348 | 0.618503    |
| Arf1       | 65 | 0.974663543 | 0.905414359 | -0.069249185 | 0.42153799 | 0.618503    |
| Cers5      | 49 | 1.188899571 | 1.105712915 | -0.083186656 | 0.42177806 | 0.618793371 |
| Edem2      | 18 | 1.691985483 | 1.724335031 | 0.032349548  | 0.42191728 | 0.618935735 |
| Tmem116    | 1  | 7.717041801 | 6.08974359  | -1.627298211 | 0.42256249 | 0.619732195 |
| Mir5625    | 18 | 1.957038004 | 2.272757256 | 0.315719251  | 0.42258691 | 0.619732195 |
| Zbtb49     | 23 | 1.122938127 | 1.293557967 | 0.170619841  | 0.42251484 | 0.619732195 |
| Adam18     | 2  | 77.52293578 | 78.13189057 | 0.608954788  | 0.42271223 | 0.619854031 |
| Nrd1       | 39 | 1.625520274 | 1.381994205 | -0.243526069 | 0.4229602  | 0.620155676 |
| Ryk        | 87 | 1.141183359 | 1.080854976 | -0.060328384 | 0.42304669 | 0.620220513 |
| .10043O21F | 56 | 1.552978761 | 1.811904015 | 0.258925254  | 0.42319995 | 0.620331204 |
| Asna1      | 15 | 2.315986844 | 2.384412611 | 0.068425767  | 0.4232378  | 0.620331204 |
| Gprc5a     | 19 | 26.23343201 | 25.60401943 | -0.629412572 | 0.42324901 | 0.620331204 |
| Rasgef1c   | 72 | 5.632427318 | 5.20976595  | -0.422661367 | 0.42346472 | 0.620399496 |
| Btbd1      | 80 | 1.122076443 | 1.154432801 | 0.032356358  | 0.42339419 | 0.620399496 |
| Vimp       | 35 | 1.188083813 | 1.397436279 | 0.209352466  | 0.42345643 | 0.620399496 |
| Rasa1      | 62 | 1.441910761 | 1.373042366 | -0.068868395 | 0.42335573 | 0.620399496 |
| Mfsd3      | 14 | 1.498264925 | 2.207779505 | 0.709514581  | 0.42378577 | 0.620457751 |
| Mrpl53     | 25 | 1.573110691 | 1.440360073 | -0.132750618 | 0.42380036 | 0.620457751 |
| Mir22hg    | 14 | 1.643136112 | 1.394912114 | -0.248223998 | 0.42384275 | 0.620457751 |
| Pcnx       | 73 | 1.462037378 | 1.587269889 | 0.125232511  | 0.4237417  | 0.620457751 |
| Nenf       | 37 | 1.703383898 | 1.096182884 | -0.607201015 | 0.42371525 | 0.620457751 |
| Mir345     | 10 | 1.490348101 | 0.832225593 | -0.658122508 | 0.42376134 | 0.620457751 |
| Cox7c      | 21 | 1.773975844 | 1.883719424 | 0.109743581  | 0.42383176 | 0.620457751 |

|            |     |             |             |              |            |             |
|------------|-----|-------------|-------------|--------------|------------|-------------|
| Fance      | 38  | 1.454267224 | 1.719730546 | 0.265463321  | 0.42368121 | 0.620457751 |
| Rhog       | 75  | 1.494872042 | 1.314114853 | -0.180757188 | 0.42400741 | 0.620513526 |
| Dok1       | 9   | 3.38643052  | 2.659816131 | -0.726614389 | 0.4240252  | 0.620513526 |
| Loxl3      | 9   | 3.38643052  | 2.659816131 | -0.726614389 | 0.4240252  | 0.620513526 |
| Tsn        | 36  | 0.697138161 | 0.653034917 | -0.044103244 | 0.42405    | 0.620513526 |
| Zfp362     | 189 | 1.739081284 | 1.537903706 | -0.201177578 | 0.42422309 | 0.620704916 |
| Sema5b     | 62  | 24.80786984 | 26.11119953 | 1.303329694  | 0.4244457  | 0.620968712 |
| Pygb       | 9   | 2.674064452 | 2.884380615 | 0.210316162  | 0.42465671 | 0.621207478 |
| Trp53rbk   | 26  | 26.41987866 | 26.79597193 | 0.376093263  | 0.42469357 | 0.621207478 |
| Ranbp1     | 55  | 1.265077769 | 0.807221514 | -0.457856255 | 0.42506389 | 0.621677113 |
| Mlxip      | 52  | 1.443225384 | 1.461527451 | 0.018302067  | 0.42509937 | 0.621677113 |
| Furin      | 125 | 0.987171655 | 0.915249637 | -0.071922018 | 0.42522714 | 0.621801996 |
| Atp6v0b    | 43  | 1.4658078   | 1.327398254 | -0.138409546 | 0.42553316 | 0.622187491 |
| Puf60      | 33  | 0.944159251 | 1.087864978 | 0.143705727  | 0.4255768  | 0.622189301 |
| Tead4      | 78  | 1.318285051 | 1.301366696 | -0.016918354 | 0.42579653 | 0.622448524 |
| Macrod1    | 37  | 0.885969967 | 0.625933115 | -0.260036852 | 0.42592962 | 0.62252719  |
| Tuba3b     | 20  | 96.29647338 | 95.28726559 | -1.009207786 | 0.42593519 | 0.62252719  |
| I30408A02F | 22  | 1.584148315 | 1.823782667 | 0.239634352  | 0.42609455 | 0.62266897  |
| Tmed8      | 72  | 1.387459945 | 1.126601043 | -0.260858903 | 0.42611706 | 0.62266897  |
| Cnot8      | 23  | 0.826200224 | 0.704677487 | -0.121522737 | 0.42650929 | 0.623180063 |
| Adipor1    | 102 | 1.161197304 | 0.940536629 | -0.220660674 | 0.42655337 | 0.62318241  |
| Arhgap11a  | 27  | 2.040653239 | 1.483420912 | -0.557232327 | 0.42661637 | 0.623212402 |
| Ddx5       | 45  | 1.342401311 | 1.667747741 | 0.32534643   | 0.42679517 | 0.623349496 |
| Grk4       | 33  | 1.467817045 | 1.154759212 | -0.313057833 | 0.42677735 | 0.623349496 |
| P2ry4      | 1   | 58.49056604 | 54.63414634 | -3.856419696 | 0.42696666 | 0.62353789  |
| I30020L05F | 43  | 1.599880089 | 1.228526614 | -0.371353475 | 0.42702705 | 0.623564029 |
| Fam21      | 17  | 1.651072206 | 1.967503039 | 0.316430833  | 0.4271042  | 0.623614625 |
| Srrd       | 14  | 0.891535573 | 0.77704592  | -0.114489653 | 0.42727924 | 0.623808142 |
| Zfp280b    | 23  | 1.023598541 | 1.027387694 | 0.003789153  | 0.42738718 | 0.623903645 |
| Nup214     | 45  | 1.431322226 | 1.35252915  | -0.078793076 | 0.42771512 | 0.624196089 |
| Nfyc       | 45  | 1.000090631 | 0.983538375 | -0.016552256 | 0.42769969 | 0.624196089 |
| Klf13      | 110 | 0.873961604 | 0.981414311 | 0.107452707  | 0.42763524 | 0.624196089 |
| Mkln1os    | 6   | 1.091269841 | 1.522941532 | 0.431671691  | 0.42779099 | 0.624244722 |
| Gsk3b      | 26  | 1.13077776  | 0.99941609  | -0.13136167  | 0.42808045 | 0.624294624 |



|            |     |             |             |              |            |             |
|------------|-----|-------------|-------------|--------------|------------|-------------|
| Mllt3      | 26  | 1.932769816 | 1.625179985 | -0.307589831 | 0.42796863 | 0.624294624 |
| Psmc6      | 41  | 1.865917192 | 1.992568357 | 0.126651166  | 0.42791445 | 0.624294624 |
| Mrps27     | 5   | 0.536936937 | 1.655555556 | 1.118618619  | 0.42802698 | 0.624294624 |
| Impdh2     | 17  | 0.790939237 | 0.566824815 | -0.224114422 | 0.42805652 | 0.624294624 |
| Fkbp11     | 3   | 8.981767007 | 9.656943506 | 0.675176499  | 0.42793735 | 0.624294624 |
| Aagab      | 61  | 1.52986393  | 1.274066675 | -0.255797254 | 0.42818638 | 0.624387059 |
| Pla2g15    | 17  | 1.658869188 | 1.872039289 | 0.213170101  | 0.42823849 | 0.624401001 |
| Arl14ep    | 33  | 2.318535995 | 2.027152697 | -0.291383298 | 0.42846362 | 0.624667186 |
| Srd5a2     | 7   | 23.97741148 | 21.65400426 | -2.323407213 | 0.42902147 | 0.625418345 |
| Sh3glb2    | 38  | 1.221753678 | 1.145998258 | -0.075755419 | 0.42913769 | 0.625460882 |
| Inip       | 33  | 1.280759042 | 1.557407081 | 0.276648039  | 0.42917549 | 0.625460882 |
| Nup98      | 34  | 1.420468338 | 1.700475662 | 0.280007324  | 0.4291843  | 0.625460882 |
| '00046G09F | 70  | 1.41760855  | 1.429722234 | 0.012113685  | 0.42922515 | 0.625460882 |
| Gstz1      | 27  | 1.06972966  | 1.052467865 | -0.017261795 | 0.42926377 | 0.625460882 |
| Fsd1       | 2   | 23.41269841 | 26.70744139 | 3.294742974  | 0.42938305 | 0.62557256  |
| Oaz1       | 15  | 1.019737299 | 0.980460434 | -0.039276865 | 0.42977677 | 0.626021874 |
| Trp53bp1   | 35  | 1.50508516  | 1.652187422 | 0.147102262  | 0.42974363 | 0.626021874 |
| Serac1     | 8   | 1.166666667 | 0.176056338 | -0.990610329 | 0.43005423 | 0.626363846 |
| Golga5     | 72  | 1.27072394  | 1.366526845 | 0.095802904  | 0.43011255 | 0.62638662  |
| Zfp384     | 91  | 1.721670389 | 1.543534004 | -0.178136385 | 0.43056826 | 0.626988057 |
| Aurkb      | 18  | 1.355205177 | 1.036644648 | -0.31856053  | 0.43069599 | 0.627111824 |
| Mfsd12     | 55  | 0.989198688 | 0.929957628 | -0.05924106  | 0.43078827 | 0.627183953 |
| Insig1     | 74  | 1.12536274  | 0.952382512 | -0.172980228 | 0.43089001 | 0.627269839 |
| 10006K23F  | 11  | 1.96844734  | 2.172548354 | 0.204101013  | 0.4311591  | 0.627429702 |
| L3mbtl3    | 66  | 1.428986215 | 1.604534585 | 0.17554837   | 0.43115468 | 0.627429702 |
| Coq2       | 30  | 0.965563213 | 1.168529132 | 0.202965919  | 0.43105096 | 0.627429702 |
| Abt1       | 13  | 1.504117694 | 1.067584816 | -0.436532878 | 0.43117085 | 0.627429702 |
| Ttc19      | 103 | 1.119915143 | 1.207093585 | 0.087178442  | 0.43137479 | 0.627664217 |
| Hs1bp3     | 17  | 0.783586243 | 1.174219726 | 0.390633483  | 0.43147191 | 0.627743293 |
| Ap3m2      | 42  | 1.28445517  | 1.362102062 | 0.077646892  | 0.43171625 | 0.627974248 |
| Dnm1l      | 50  | 1.680163229 | 1.157586394 | -0.522576835 | 0.43170519 | 0.627974248 |
| Psmc10     | 6   | 18.51543583 | 16.84962379 | -1.665812047 | 0.43180285 | 0.628037958 |
| Donson     | 98  | 1.299349195 | 1.245083058 | -0.054266136 | 0.43188072 | 0.628088962 |
| Tbata      | 9   | 73.48828484 | 75.09278239 | 1.604497549  | 0.43203109 | 0.628245389 |

|             |     |             |             |              |            |             |
|-------------|-----|-------------|-------------|--------------|------------|-------------|
| Dnajb4      | 29  | 0.51647914  | 0.911350523 | 0.394871382  | 0.43226295 | 0.628520265 |
| Cacnb3      | 101 | 5.746501437 | 5.606381513 | -0.140119924 | 0.43231612 | 0.628535298 |
| Wdr11       | 31  | 1.564802683 | 1.481046914 | -0.083755769 | 0.432399   | 0.628593507 |
| Lmna        | 64  | 2.668358641 | 2.863329682 | 0.194971042  | 0.43258256 | 0.628798073 |
| Ythdf1      | 76  | 0.880851849 | 0.867013961 | -0.013837887 | 0.43263129 | 0.628806616 |
| Prep        | 116 | 1.237730268 | 1.188626393 | -0.049103875 | 0.43296613 | 0.629183924 |
| Nup62-il4i1 | 16  | 2.039213599 | 1.663877872 | -0.375335726 | 0.43297664 | 0.629183924 |
| Pcbd2       | 38  | 1.001135633 | 0.795499597 | -0.205636036 | 0.43316093 | 0.629327079 |
| Tcaf2       | 5   | 18.0892372  | 17.61854348 | -0.470693716 | 0.43315037 | 0.629327079 |
| l30304l02R  | 45  | 0.863591069 | 1.339518138 | 0.475927069  | 0.43326313 | 0.629413241 |
| Zscan21     | 11  | 1.352544502 | 0.982558803 | -0.3699857   | 0.43354075 | 0.629691872 |
| Farsb       | 10  | 0.921747134 | 1.224265553 | 0.302518419  | 0.43351604 | 0.629691872 |
| Cenpn       | 11  | 1.49222661  | 0.753901868 | -0.738324742 | 0.43375229 | 0.629859916 |
| Atad3aos    | 5   | 0.75071464  | 0.540048455 | -0.210666185 | 0.43377767 | 0.629859916 |
| Trpm4       | 20  | 1.49782306  | 2.109673081 | 0.611850021  | 0.43378522 | 0.629859916 |
| Eaf1        | 40  | 1.594008867 | 1.689141691 | 0.095132825  | 0.43383029 | 0.629863036 |
| Dlgap5      | 13  | 1.48200469  | 1.029914627 | -0.452090063 | 0.43393369 | 0.629928221 |
| Zswim3      | 8   | 1.827756488 | 1.248005791 | -0.579750697 | 0.43396105 | 0.629928221 |
| Casc1       | 2   | 0           | 0.264550265 | 0.264550265  | 0.43416066 | 0.63003101  |
| Taf7l       | 20  | 94.11883818 | 94.03243367 | -0.086404505 | 0.43413726 | 0.63003101  |
| Dnajc28     | 11  | 1.774271259 | 1.548086412 | -0.226184846 | 0.43410088 | 0.63003101  |
| Rgmb        | 88  | 1.429608259 | 1.502876874 | 0.073268615  | 0.4343922  | 0.630212515 |
| Psmf1       | 2   | 6.060606061 | 4.664243683 | -1.396362378 | 0.43440531 | 0.630212515 |
| Gm5475      | 29  | 2.792400147 | 2.615542211 | -0.176857935 | 0.43441458 | 0.630212515 |
| Mir1956     | 5   | 0.816326531 | 0           | -0.816326531 | 0.4344613  | 0.630217978 |
| Rbak        | 21  | 1.11777281  | 0.943535107 | -0.174237704 | 0.43452541 | 0.630248674 |
| Romo1       | 54  | 0.892730863 | 0.903765303 | 0.011034439  | 0.43467832 | 0.630408157 |
| Spc24       | 3   | 1.834862385 | 2.234909036 | 0.40004665   | 0.43523011 | 0.630958965 |
| Polr2h      | 30  | 1.789930888 | 1.614625829 | -0.175305059 | 0.43517291 | 0.630958965 |
| Nceh1       | 24  | 2.292588809 | 1.5517685   | -0.740820308 | 0.43517113 | 0.630958965 |
| Blmh        | 41  | 1.746438952 | 1.48023167  | -0.266207283 | 0.43520362 | 0.630958965 |
| Abcc1       | 57  | 0.978123375 | 0.909637723 | -0.068485652 | 0.43553531 | 0.631339048 |
| i30005N14F  | 80  | 1.080522279 | 0.944441835 | -0.136080443 | 0.43560297 | 0.631374745 |
| Mtfmt       | 32  | 1.225685846 | 1.148847089 | -0.076838757 | 0.43571702 | 0.631477679 |

|          |    |             |             |              |            |             |
|----------|----|-------------|-------------|--------------|------------|-------------|
| Cadm3    | 31 | 45.57325357 | 45.37173561 | -0.201517968 | 0.43592421 | 0.631715574 |
| Tra2b    | 34 | 1.677502849 | 1.076027571 | -0.601475279 | 0.43603231 | 0.63180982  |
| Klf9     | 69 | 0.638395018 | 0.619553802 | -0.018841217 | 0.43614922 | 0.631830381 |
| Nol11    | 37 | 1.525330763 | 1.368263002 | -0.157067761 | 0.43617487 | 0.631830381 |
| Thumpd1  | 47 | 0.96545073  | 1.260420599 | 0.294969869  | 0.43621873 | 0.631830381 |
| Manba    | 25 | 1.854049807 | 1.791641444 | -0.062408362 | 0.436198   | 0.631830381 |
| Tprgl    | 74 | 1.172505842 | 1.194391985 | 0.021886142  | 0.43634588 | 0.631952181 |
| Tubb6    | 52 | 1.619474029 | 1.400534455 | -0.218939574 | 0.43641432 | 0.631988923 |
| Zfp69    | 53 | 1.197477506 | 1.236759154 | 0.039281649  | 0.43652445 | 0.632086024 |
| AU040320 | 49 | 1.42812525  | 1.380936506 | -0.047188744 | 0.43660041 | 0.632133631 |
| C2cd4c   | 40 | 4.311511984 | 4.420897982 | 0.109385998  | 0.436819   | 0.63238773  |
| Mrpl18   | 6  | 0.732385431 | 0.421940928 | -0.310444502 | 0.4371386  | 0.632787981 |
| Dclre1c  | 5  | 2.228229577 | 2.240576205 | 0.012346628  | 0.43727317 | 0.632857922 |
| Slitrk1  | 2  | 4.206349206 | 6.298076923 | 2.091727717  | 0.43725873 | 0.632857922 |
| Cep68    | 56 | 1.268992757 | 1.265366338 | -0.003626419 | 0.43737188 | 0.632884239 |
| Dbx1     | 38 | 45.02842195 | 44.15690834 | -0.87151362  | 0.43737761 | 0.632884239 |
| Adpgk    | 70 | 1.327493439 | 1.339443598 | 0.011950159  | 0.43750351 | 0.633003995 |
| Tmem101  | 18 | 0.757082538 | 0.825312841 | 0.068230304  | 0.43757219 | 0.633040946 |
| Slc7a6os | 34 | 0.622343989 | 0.640448976 | 0.018104987  | 0.43776971 | 0.633158522 |
| Sec24b   | 92 | 1.195371125 | 1.27108796  | 0.075716835  | 0.43775857 | 0.633158522 |
| Rpl18a   | 29 | 1.032230452 | 0.969861009 | -0.062369443 | 0.43778291 | 0.633158522 |
| Pinx1    | 31 | 1.447410322 | 1.154474407 | -0.292935915 | 0.43783528 | 0.63317186  |
| Rab25    | 3  | 85.83377963 | 88.65447683 | 2.820697199  | 0.43802062 | 0.633377477 |
| Zscan22  | 16 | 1.954055302 | 1.072301235 | -0.881754068 | 0.43808627 | 0.633409981 |
| Mthfsd   | 9  | 0.932530385 | 1.241501359 | 0.308970974  | 0.43822508 | 0.63348584  |
| Pcdhga5  | 4  | 50.97527473 | 49.22952586 | -1.745748863 | 0.43818386 | 0.63348584  |
| Hk1      | 22 | 1.580853551 | 1.516668224 | -0.064185327 | 0.43842975 | 0.633719283 |
| Hck      | 20 | 11.34283759 | 12.16914928 | 0.826311688  | 0.43858243 | 0.633752688 |
| Srd5a3   | 34 | 1.193749513 | 1.223102144 | 0.029352631  | 0.43852388 | 0.633752688 |
| Il25     | 1  | 49.52380952 | 54.90196078 | 5.378151261  | 0.43855323 | 0.633752688 |
| Wdr47    | 31 | 1.05885152  | 1.008086761 | -0.050764758 | 0.4386318  | 0.63376162  |
| Pgrmc2   | 70 | 1.24306942  | 1.036653115 | -0.206416305 | 0.43878656 | 0.633904598 |
| Hcfc2    | 54 | 0.977638891 | 0.923596138 | -0.054042752 | 0.43881715 | 0.633904598 |
| Npff     | 1  | 95.38461538 | 97.6744186  | 2.28980322   | 0.43893445 | 0.634011629 |

|            |     |              |             |              |            |             |
|------------|-----|--------------|-------------|--------------|------------|-------------|
| Mzt2       | 8   | 1.720872518  | 1.56029671  | -0.160575809 | 0.43898451 | 0.634021531 |
| Lmnb2      | 15  | 3.361396152  | 2.423537339 | -0.937858813 | 0.43904816 | 0.634051054 |
| Dnajc18    | 30  | 1.88324048   | 1.490752925 | -0.392487554 | 0.43914289 | 0.63412545  |
| Sirt6      | 18  | 2.455218832  | 2.932095435 | 0.476876603  | 0.43924954 | 0.634217037 |
| Extl2      | 18  | 2.517426452  | 2.250865553 | -0.266560898 | 0.43930743 | 0.634238213 |
| Rps14      | 46  | 1.219084056  | 1.46935629  | 0.250272234  | 0.43989956 | 0.635030616 |
| Lbh        | 36  | 2.385901207  | 1.75943218  | -0.626469027 | 0.44004182 | 0.635173487 |
| Sypl       | 66  | 1.362035001  | 1.135593498 | -0.226441503 | 0.44080419 | 0.636179576 |
| Ddx54      | 47  | 1.171811918  | 1.074688599 | -0.097123319 | 0.44082554 | 0.636179576 |
| Atp6ap2    | 6   | 22.39857112  | 23.74625799 | 1.347686869  | 0.44087044 | 0.63618181  |
| Itgb3bp    | 11  | 0.495867769  | 0.685930231 | 0.190062463  | 0.44095599 | 0.636242696 |
| Prdx1      | 29  | 1.449016185  | 1.247934743 | -0.201081442 | 0.44107983 | 0.636340705 |
| .30308A19F | 88  | 1.219159765  | 1.125289647 | -0.093870118 | 0.44111065 | 0.636340705 |
| Atp11a     | 127 | 5.138217673  | 5.818691076 | 0.680473403  | 0.44115943 | 0.636348515 |
| Poldip3    | 67  | 1.100450957  | 0.989979715 | -0.110471243 | 0.44126752 | 0.636441867 |
| Tmem216    | 8   | 2.019296448  | 1.585777763 | -0.433518685 | 0.44132259 | 0.636458733 |
| Fut8       | 106 | 1.326713295  | 1.316595228 | -0.010118067 | 0.44140126 | 0.636509641 |
| Tysnd1     | 52  | 1.333978767  | 1.187780083 | -0.146198685 | 0.44145391 | 0.636523006 |
| Lgals1     | 3   | 4.581309915  | 5.019832281 | 0.438522366  | 0.44180623 | 0.63696842  |
| Tsr1       | 68  | 1.537440154  | 1.265188336 | -0.272251818 | 0.44200813 | 0.637196903 |
| Rpph1      | 19  | 1.606438055  | 1.950175406 | 0.343737352  | 0.44213833 | 0.637321995 |
| Derl1      | 66  | 1.38951223   | 1.471777076 | 0.082264846  | 0.44258414 | 0.637901949 |
| Nsd1       | 25  | 80.74388774  | 80.03296454 | -0.710923198 | 0.44279629 | 0.638145043 |
| Cct6b      | 11  | 0.558114874  | 0.636553889 | 0.078439015  | 0.44294532 | 0.638256129 |
| Glg1       | 43  | 1.513356291  | 1.302013784 | -0.211342508 | 0.44296037 | 0.638256129 |
| Pithd1     | 49  | 5.7111790815 | 6.188507202 | 0.476716387  | 0.4431137  | 0.638414379 |
| Pbrm1      | 31  | 1.127858841  | 1.072102699 | -0.055756142 | 0.4433569  | 0.638702054 |
| Tbc1d24    | 45  | 2.040649954  | 2.02696332  | -0.013686634 | 0.4435238  | 0.638879767 |
| Nipsnap3b  | 15  | 1.464325798  | 0.96071191  | -0.503613888 | 0.4435815  | 0.638900176 |
| Aup1       | 28  | 2.365486432  | 1.790000875 | -0.575485557 | 0.44396016 | 0.639333338 |
| Zfp946     | 8   | 4.094623052  | 3.198895493 | -0.895727559 | 0.44396941 | 0.639333338 |
| Vps33b     | 23  | 1.272870799  | 1.005073515 | -0.267797284 | 0.4441831  | 0.639578337 |
| Myo1e      | 27  | 1.471608048  | 1.209187486 | -0.262420562 | 0.4443639  | 0.639775895 |
| Il17d      | 95  | 1.984159081  | 1.878752388 | -0.105406693 | 0.44472231 | 0.64022909  |

|          |     |             |             |              |            |             |
|----------|-----|-------------|-------------|--------------|------------|-------------|
| Letmd1   | 58  | 1.420921523 | 1.296344541 | -0.124576983 | 0.4447822  | 0.640252501 |
| Frs3     | 60  | 1.519391874 | 1.416772346 | -0.102619528 | 0.44486115 | 0.640303331 |
| Greb1l   | 55  | 9.624927147 | 9.59235825  | -0.032568897 | 0.44500463 | 0.640355357 |
| Glud1    | 112 | 1.049134713 | 1.011566865 | -0.037567848 | 0.44510466 | 0.640355357 |
| Mir7088  | 1   | 98.4        | 96.84210526 | -1.557894737 | 0.44511637 | 0.640355357 |
| Alas1    | 66  | 1.837593862 | 1.458313574 | -0.379280287 | 0.4449463  | 0.640355357 |
| Cmip     | 186 | 1.358409072 | 1.26817548  | -0.090233591 | 0.44515913 | 0.640355357 |
| Mst1     | 1   | 98.4        | 96.84210526 | -1.557894737 | 0.44511637 | 0.640355357 |
| Psen1    | 45  | 1.482978432 | 1.170229086 | -0.312749347 | 0.44525044 | 0.640423936 |
| Bend6    | 85  | 1.405942519 | 1.258700429 | -0.14724209  | 0.44546756 | 0.640673422 |
| Arhgap35 | 7   | 1.920129453 | 2.381005468 | 0.460876015  | 0.44556048 | 0.640744259 |
| Nexn     | 15  | 9.974657098 | 9.14845076  | -0.826206338 | 0.44582583 | 0.641002632 |
| Ppil3    | 8   | 2.304975557 | 2.064071639 | -0.240903918 | 0.4458415  | 0.641002632 |
| Carf     | 8   | 1.461901037 | 1.050751991 | -0.411149046 | 0.44587119 | 0.641002632 |
| Mark4    | 42  | 2.018424897 | 2.017277726 | -0.00114717  | 0.44596179 | 0.641070074 |
| Scarna13 | 28  | 2.198409791 | 2.692944672 | 0.494534881  | 0.44609696 | 0.64120156  |
| Pacrgl   | 28  | 2.037575387 | 2.56508498  | 0.527509593  | 0.44620156 | 0.641289102 |
| Lymr1    | 20  | 2.212681383 | 2.767793441 | 0.555112058  | 0.44633428 | 0.641356912 |
| Shfm1    | 46  | 1.061616917 | 1.060435574 | -0.001181342 | 0.44634237 | 0.641356912 |
| Trim27   | 56  | 1.39802071  | 1.122843527 | -0.275177183 | 0.44637987 | 0.641356912 |
| Pfdn6    | 8   | 0.791156446 | 0.938514097 | 0.147357651  | 0.44642558 | 0.641359795 |
| Mir7662  | 1   | 94.69026549 | 96.55172414 | 1.861458651  | 0.4464957  | 0.641397746 |
| Rabggtb  | 24  | 1.465277256 | 1.416570546 | -0.048706711 | 0.44663341 | 0.641407183 |
| Dcaf6    | 73  | 1.603030236 | 1.351046291 | -0.251983945 | 0.44660103 | 0.641407183 |
| Eif2b4   | 43  | 1.557985911 | 1.417057308 | -0.140928603 | 0.44656719 | 0.641407183 |
| Tmem191c | 21  | 0.935039276 | 1.31088002  | 0.375840744  | 0.44684024 | 0.641641416 |
| Parvg    | 3   | 59.00288225 | 60.26139822 | 1.258515963  | 0.44713286 | 0.64199879  |
| Map3k14  | 74  | 2.174631567 | 1.945401456 | -0.229230111 | 0.44734275 | 0.642237313 |
| Zdhhc12  | 57  | 1.693918979 | 1.781949454 | 0.088030475  | 0.44772596 | 0.642724586 |
| Hic2     | 52  | 1.244423284 | 1.365288665 | 0.120865381  | 0.4478484  | 0.642837466 |
| Zfp810   | 33  | 1.32339355  | 1.461787448 | 0.138393898  | 0.44796394 | 0.642940426 |
| Sepsecs  | 36  | 1.421362683 | 1.493754353 | 0.072391671  | 0.44812263 | 0.643105273 |
| Zfp715   | 52  | 1.548619354 | 1.560597177 | 0.011977823  | 0.44849753 | 0.643391607 |
| B4galt3  | 29  | 18.32163098 | 18.24371191 | -0.077919073 | 0.44846672 | 0.643391607 |

|          |     |             |             |              |            |             |
|----------|-----|-------------|-------------|--------------|------------|-------------|
| Ciao1    | 25  | 1.066687159 | 1.33825827  | 0.271571111  | 0.44839085 | 0.643391607 |
| Mrps16   | 32  | 1.120975384 | 1.081484454 | -0.03949093  | 0.4484105  | 0.643391607 |
| Lox      | 3   | 29.52380952 | 32.41584158 | 2.89203206   | 0.44880212 | 0.643639784 |
| Serpnb6a | 59  | 1.202430725 | 1.071597908 | -0.130832817 | 0.44873502 | 0.643639784 |
| Trpa1    | 8   | 20.62916399 | 19.91805291 | -0.711111081 | 0.4487789  | 0.643639784 |
| Cacybp   | 92  | 1.329540401 | 1.069576434 | -0.259963967 | 0.44892393 | 0.643751564 |
| Ndufa6   | 45  | 1.248047472 | 1.293183367 | 0.045135896  | 0.44904973 | 0.64380613  |
| Edem1    | 84  | 0.922160076 | 0.928720138 | 0.006560062  | 0.44902337 | 0.64380613  |
| Gatad1   | 108 | 1.582750535 | 1.498103769 | -0.084646766 | 0.44911721 | 0.643839966 |
| Srsf3    | 61  | 1.252670554 | 1.132790356 | -0.119880197 | 0.44930183 | 0.644041722 |
| G3bp1    | 72  | 1.103910334 | 0.895538573 | -0.208371762 | 0.44942582 | 0.644156519 |
| Adora2b  | 38  | 2.740317168 | 2.785535279 | 0.045218111  | 0.449635   | 0.644350332 |
| Sf3b4    | 36  | 1.827763539 | 2.053113852 | 0.225350313  | 0.44964886 | 0.644350332 |
| Pcdha5   | 3   | 69.31818182 | 73.44444444 | 4.126262626  | 0.44972411 | 0.644395228 |
| Spsb2    | 27  | 1.721399171 | 1.810912953 | 0.089513782  | 0.45004102 | 0.644719175 |
| Zfp790   | 7   | 1.447230074 | 1.26269528  | -0.184534794 | 0.45002782 | 0.644719175 |
| Tmem208  | 14  | 0.97064483  | 1.340627906 | 0.369983076  | 0.450082   | 0.644719175 |
| Grtp1    | 13  | 1.045817444 | 1.086550417 | 0.040732974  | 0.45019629 | 0.64475702  |
| Pbx3     | 145 | 1.36881213  | 1.274982543 | -0.093829587 | 0.45016377 | 0.64475702  |
| Ybx1     | 92  | 1.388360301 | 1.253322056 | -0.135038245 | 0.45033904 | 0.64489851  |
| Cdkn3    | 28  | 1.134214948 | 0.864855656 | -0.269359292 | 0.45038473 | 0.644901007 |
| Cab39    | 46  | 0.839573862 | 0.885776047 | 0.046202185  | 0.45044848 | 0.644929364 |
| Prpf4b   | 35  | 0.665959177 | 1.400462836 | 0.734503659  | 0.45050862 | 0.644952531 |
| Notch1   | 14  | 1.92078532  | 1.435231857 | -0.485553463 | 0.45067298 | 0.645124891 |
| Ocel1    | 49  | 1.445807576 | 1.328952315 | -0.11685526  | 0.45080617 | 0.645252613 |
| Camsap1  | 95  | 1.281696362 | 0.969279523 | -0.312416839 | 0.45098934 | 0.64545183  |
| Arl3     | 7   | 1.059900409 | 1.16487219  | 0.104971781  | 0.45112704 | 0.645585934 |
| Tbcc     | 38  | 1.582242825 | 1.317323621 | -0.264919205 | 0.45126853 | 0.645669572 |
| Ung      | 66  | 1.261494641 | 1.298188945 | 0.036694304  | 0.45127925 | 0.645669572 |
| Heatr5a  | 37  | 1.958644619 | 1.686893544 | -0.271751075 | 0.45131749 | 0.645669572 |
| Naaa     | 10  | 2.676397758 | 2.412002437 | -0.264395321 | 0.45169926 | 0.646063906 |
| Mllt1    | 127 | 3.646562897 | 3.690424595 | 0.043861698  | 0.4517009  | 0.646063906 |
| Slc43a2  | 75  | 1.270579211 | 1.32394286  | 0.053363648  | 0.45172521 | 0.646063906 |
| Mdfic    | 25  | 1.164553062 | 1.165000837 | 0.000447775  | 0.45200961 | 0.64640387  |

|            |     |             |             |              |            |             |
|------------|-----|-------------|-------------|--------------|------------|-------------|
| Baz1b      | 110 | 1.285700071 | 1.326309144 | 0.040609073  | 0.45205101 | 0.64640387  |
| Wrb        | 25  | 1.26175714  | 1.064256168 | -0.197500972 | 0.45211075 | 0.646426308 |
| Chpf2      | 29  | 1.274005612 | 1.237851001 | -0.036154611 | 0.45227932 | 0.646541323 |
| Zfp296     | 31  | 2.954747289 | 2.642217177 | -0.312530112 | 0.45226236 | 0.646541323 |
| Tmem127    | 46  | 1.699458269 | 1.794658581 | 0.095200312  | 0.45234177 | 0.646554583 |
| Fam107b    | 35  | 1.366873796 | 1.271770138 | -0.095103658 | 0.45238642 | 0.646554583 |
| Aacs       | 37  | 1.074111298 | 1.084523928 | 0.01041263   | 0.45242078 | 0.646554583 |
| Bcr        | 115 | 1.448148811 | 1.315002632 | -0.133146179 | 0.45254829 | 0.646673841 |
| Tm2d3      | 59  | 1.331385933 | 1.345415837 | 0.014029905  | 0.45281796 | 0.64691607  |
| Socs2      | 117 | 1.385242534 | 1.233820796 | -0.151421737 | 0.45287832 | 0.64691607  |
| Loxl4      | 18  | 1.076318329 | 1.56740636  | 0.49108803   | 0.45279901 | 0.64691607  |
| Nipa1      | 44  | 1.173179247 | 1.24222892  | 0.069049673  | 0.45289415 | 0.64691607  |
| Anxa2      | 27  | 1.656330271 | 1.342659341 | -0.31367093  | 0.45301609 | 0.647027265 |
| Dusp1      | 89  | 1.155944585 | 1.168600356 | 0.012655772  | 0.45315671 | 0.647165123 |
| Setbp1     | 171 | 1.243390488 | 1.218158343 | -0.025232145 | 0.45328055 | 0.647210019 |
| Tubd1      | 19  | 2.728281331 | 2.24101552  | -0.487265812 | 0.45332047 | 0.647210019 |
| Foxq1      | 46  | 11.74953182 | 10.89545127 | -0.854080553 | 0.45330879 | 0.647210019 |
| Dffb       | 84  | 1.573703521 | 1.474634765 | -0.099068756 | 0.45353821 | 0.647457891 |
| I30473A02F | 11  | 1.590717507 | 2.232832098 | 0.642114591  | 0.45360525 | 0.64749061  |
| Cfl1       | 68  | 1.123309039 | 1.266271758 | 0.142962719  | 0.45396364 | 0.647862336 |
| Ado        | 95  | 0.906829564 | 0.896796811 | -0.010032753 | 0.45399812 | 0.647862336 |
| Tex30      | 56  | 1.18638797  | 1.372817853 | 0.186429883  | 0.45392465 | 0.647862336 |
| 700026F02F | 3   | 48.65460882 | 46.10329639 | -2.551312427 | 0.45440569 | 0.648143767 |
| Nanos2     | 1   | 29.33333333 | 24.17582418 | -5.157509158 | 0.45431981 | 0.648143767 |
| Ppp5c      | 24  | 1.569017398 | 1.566151789 | -0.00286561  | 0.4543495  | 0.648143767 |
| 30007P13F  | 17  | 8.181078642 | 8.046192481 | -0.13488616  | 0.45441618 | 0.648143767 |
| Ddit3      | 24  | 1.605654987 | 1.413357625 | -0.192297362 | 0.45435935 | 0.648143767 |
| Chic2      | 105 | 1.291485877 | 1.233986598 | -0.057499278 | 0.45448069 | 0.648172769 |
| Nkx2-9     | 14  | 55.00070206 | 56.72393257 | 1.723230511  | 0.45472422 | 0.64833105  |
| Rwdd2b     | 21  | 1.214018196 | 0.834699724 | -0.379318472 | 0.4547242  | 0.64833105  |
| Ell        | 31  | 1.307991384 | 1.504508557 | 0.196517173  | 0.45471212 | 0.64833105  |
| Lgmn       | 36  | 1.710304018 | 1.378313444 | -0.331990574 | 0.45485739 | 0.648457911 |
| Tstd3      | 10  | 2.074762577 | 2.675928373 | 0.601165795  | 0.45502937 | 0.648640079 |
| Gpa33      | 2   | 81.11497501 | 82.92338862 | 1.808413618  | 0.45557562 | 0.648886422 |

|            |     |             |             |              |            |             |
|------------|-----|-------------|-------------|--------------|------------|-------------|
| Plagl2     | 72  | 1.126817503 | 0.924179243 | -0.20263826  | 0.45532921 | 0.648886422 |
| Pa2g4      | 43  | 1.093721686 | 1.178392507 | 0.084670821  | 0.45525369 | 0.648886422 |
| Rrp1b      | 16  | 1.466723998 | 1.252403162 | -0.214320836 | 0.45555425 | 0.648886422 |
| Rnd3       | 3   | 2.630052755 | 2.849002849 | 0.218950094  | 0.45560016 | 0.648886422 |
| Clu        | 18  | 2.527584148 | 2.334072379 | -0.193511769 | 0.45554086 | 0.648886422 |
| Zmynd12    | 43  | 1.718828062 | 3.023659497 | 1.304831435  | 0.455509   | 0.648886422 |
| .30311K13F | 51  | 1.326386999 | 1.273588014 | -0.052798985 | 0.455393   | 0.648886422 |
| Rnf216     | 83  | 1.165136935 | 1.282436902 | 0.117299967  | 0.45555899 | 0.648886422 |
| Tsx        | 1   | 93.67088608 | 90.625      | -3.045886076 | 0.45598395 | 0.649256416 |
| Tceanc2    | 14  | 0.926565534 | 1.387107499 | 0.460541964  | 0.45590679 | 0.649256416 |
| Otud7b     | 51  | 0.975596294 | 0.976858516 | 0.001262222  | 0.45599268 | 0.649256416 |
| 10055G02F  | 32  | 1.566697865 | 1.316959477 | -0.249738387 | 0.45620997 | 0.649439761 |
| Accs       | 20  | 1.875578572 | 2.231003419 | 0.355424847  | 0.45620404 | 0.649439761 |
| 30612E09F  | 42  | 8.10065393  | 7.655273791 | -0.445380139 | 0.45692374 | 0.650392765 |
| Tbl2       | 19  | 2.589875052 | 2.495170591 | -0.094704461 | 0.45717119 | 0.650681873 |
| Zfp420     | 8   | 1.020108208 | 1.035919129 | 0.015810921  | 0.45741447 | 0.65077564  |
| Vip        | 3   | 19.84755199 | 21.40877972 | 1.561227722  | 0.45737805 | 0.65077564  |
| Cbwd1      | 7   | 1.713288709 | 1.910315289 | 0.19702658   | 0.45731404 | 0.65077564  |
| Gabpb1     | 49  | 2.121023952 | 2.462726615 | 0.341702663  | 0.45732626 | 0.65077564  |
| Ppp2r5c    | 109 | 1.364533247 | 1.486980724 | 0.122447476  | 0.45750067 | 0.650835173 |
| Snx17      | 24  | 1.390676192 | 1.27506885  | -0.115607342 | 0.45770986 | 0.651069647 |
| Cdk9       | 48  | 1.348743218 | 1.016418063 | -0.332325155 | 0.45791394 | 0.651296811 |
| Snupn      | 12  | 0.963442867 | 0.500471827 | -0.46297104  | 0.45837842 | 0.651894253 |
| Pck2       | 3   | 1.642522636 | 1.610904585 | -0.031618051 | 0.45868302 | 0.652264236 |
| Tap1       | 12  | 0.892778291 | 0.6641753   | -0.228602991 | 0.45892407 | 0.65254378  |
| Eif2s1     | 34  | 1.594386162 | 1.139557137 | -0.454829025 | 0.45910273 | 0.652671323 |
| Tmem29     | 18  | 2.913550948 | 2.024282716 | -0.889268233 | 0.45907927 | 0.652671323 |
| H2-T9      | 7   | 1.590702604 | 2.262577402 | 0.671874798  | 0.45922305 | 0.652779135 |
| Wdr89      | 11  | 1.183260698 | 2.10297496  | 0.919714263  | 0.45929322 | 0.652815644 |
| Pam16      | 28  | 1.237393246 | 1.386878333 | 0.149485087  | 0.4595014  | 0.652998321 |
| Magef1     | 32  | 0.884234598 | 0.870395189 | -0.013839409 | 0.45951074 | 0.652998321 |
| Slain2     | 100 | 0.88670949  | 0.895315532 | 0.008606041  | 0.45955597 | 0.652999351 |
| Lama1      | 8   | 50.60098641 | 50.15837868 | -0.442607723 | 0.4596559  | 0.653078108 |
| Chp1       | 33  | 1.296363734 | 0.961015463 | -0.335348271 | 0.45971689 | 0.653101524 |



|            |     |             |             |              |            |             |
|------------|-----|-------------|-------------|--------------|------------|-------------|
| Simc1      | 75  | 1.43897563  | 1.267584277 | -0.171391353 | 0.45985235 | 0.653147961 |
| Ddhd1      | 26  | 2.084732459 | 2.449179548 | 0.364447089  | 0.45988311 | 0.653147961 |
| C1qtnf6    | 4   | 36.79986739 | 39.85068131 | 3.050813916  | 0.45981087 | 0.653147961 |
| Olig1      | 9   | 7.997200269 | 9.177933178 | 1.180732909  | 0.45997678 | 0.653154563 |
| Gm16897    | 30  | 1.29372117  | 1.206948988 | -0.086772182 | 0.4599596  | 0.653154563 |
| Hccs       | 34  | 17.2326103  | 17.40448391 | 0.171873611  | 0.46005873 | 0.653207729 |
| Rbm15b     | 155 | 2.265513136 | 2.07450749  | -0.191005646 | 0.46014949 | 0.653273371 |
| Rab4a      | 30  | 1.02121293  | 1.198091025 | 0.176878095  | 0.4604983  | 0.653705333 |
| Fam171a2   | 51  | 4.008784898 | 3.678645323 | -0.330139575 | 0.46079918 | 0.65406918  |
| Hdac11     | 6   | 3.11325929  | 1.950318393 | -1.162940896 | 0.46100291 | 0.654231796 |
| Mgat2      | 80  | 1.154772258 | 0.9013603   | -0.253411958 | 0.46098777 | 0.654231796 |
| Ereg       | 9   | 5.595912817 | 5.223195285 | -0.372717532 | 0.46143167 | 0.654776943 |
| Rp9        | 103 | 1.165729825 | 1.214892059 | 0.049162233  | 0.4614924  | 0.654799789 |
| Lrp6       | 105 | 1.189422388 | 0.975718114 | -0.213704274 | 0.46158462 | 0.654867326 |
| Dnm2       | 29  | 1.600836616 | 1.423603891 | -0.177232725 | 0.46207517 | 0.655395526 |
| Ndufa2     | 8   | 0.86407767  | 1.090338706 | 0.226261036  | 0.4620551  | 0.655395526 |
| Vmac       | 44  | 1.732816472 | 1.824154964 | 0.091338492  | 0.46209092 | 0.655395526 |
| Capns1     | 24  | 1.90428111  | 1.96405112  | 0.05977001   | 0.46235158 | 0.655574709 |
| Setd1b     | 82  | 1.490511087 | 1.492647631 | 0.002136544  | 0.46239595 | 0.655574709 |
| Cog2       | 15  | 1.106139892 | 0.756934356 | -0.349205536 | 0.46233022 | 0.655574709 |
| Orc4       | 18  | 1.630543949 | 1.862851397 | 0.232307447  | 0.46236001 | 0.655574709 |
| Man2c1     | 15  | 1.302238244 | 1.128852242 | -0.173386002 | 0.46255006 | 0.655649328 |
| Gm5868     | 18  | 22.37207507 | 21.78488359 | -0.587191477 | 0.46258263 | 0.655649328 |
| Foxj3      | 145 | 1.149623249 | 1.039854893 | -0.109768356 | 0.46255613 | 0.655649328 |
| Shc4       | 2   | 3.188992109 | 2.784446015 | -0.404546093 | 0.46265804 | 0.655692883 |
| Fam122a    | 49  | 1.611017065 | 1.602607451 | -0.008409615 | 0.4627175  | 0.655713821 |
| Zfp599     | 14  | 2.332812863 | 1.918731333 | -0.41408153  | 0.4628645  | 0.655858792 |
| Nxt1       | 48  | 1.001349237 | 1.109971746 | 0.108622509  | 0.46294528 | 0.655908361 |
| Dsn1       | 37  | 1.366763485 | 1.499901813 | 0.133138328  | 0.46298888 | 0.655908361 |
| Mfsd8      | 16  | 2.557783969 | 2.57333878  | 0.015554811  | 0.46304598 | 0.655925933 |
| Map4k5     | 28  | 0.802396312 | 0.783280668 | -0.019115644 | 0.46315764 | 0.656020779 |
| '00011C11F | 2   | 16.09219269 | 14.97763966 | -1.114553034 | 0.46325847 | 0.656100259 |
| Sc5d       | 48  | 1.108726538 | 1.196996787 | 0.088270249  | 0.46333003 | 0.656138277 |
| Isca1      | 69  | 1.082175443 | 0.956604173 | -0.12557127  | 0.46341481 | 0.656195018 |

|            |     |             |             |              |            |             |
|------------|-----|-------------|-------------|--------------|------------|-------------|
| Atp6v1c1   | 56  | 1.346624574 | 1.195165871 | -0.151458703 | 0.46349116 | 0.656239806 |
| Zfand1     | 25  | 1.615501643 | 1.678431263 | 0.06292962   | 0.46365001 | 0.656274738 |
| Mir320     | 26  | 1.363410534 | 1.524426216 | 0.161015682  | 0.46361045 | 0.656274738 |
| 510030E20F | 43  | 1.02404708  | 0.953436229 | -0.070610851 | 0.46360429 | 0.656274738 |
| Cnnm3      | 93  | 1.622911265 | 1.623687354 | 0.000776089  | 0.46381438 | 0.656408226 |
| Zfp329     | 28  | 1.648342288 | 1.104174971 | -0.544167318 | 0.46383378 | 0.656408226 |
| Csnk1a1    | 74  | 1.017500588 | 0.967663092 | -0.049837497 | 0.46398174 | 0.656554303 |
| Dst        | 131 | 1.71039989  | 1.565545917 | -0.144853974 | 0.46441656 | 0.656979518 |
| Ccdc53     | 13  | 1.907521686 | 2.032563251 | 0.125041565  | 0.4643628  | 0.656979518 |
| Eef1a1     | 64  | 1.431336257 | 0.930455868 | -0.500880389 | 0.46438806 | 0.656979518 |
| Mcf2l      | 8   | 51.02153057 | 49.96750831 | -1.054022257 | 0.46454349 | 0.657095733 |
| Fam120aos  | 186 | 1.26855752  | 1.226105156 | -0.042452364 | 0.46505806 | 0.657696794 |
| Slc30a1    | 98  | 1.09279491  | 1.041286261 | -0.051508649 | 0.46502092 | 0.657696794 |
| Tubb4b     | 33  | 1.360026049 | 1.571007468 | 0.210981419  | 0.46523947 | 0.657826556 |
| Tmem126a   | 32  | 1.402883582 | 1.228149487 | -0.174734095 | 0.46521069 | 0.657826556 |
| Chchd2     | 20  | 3.281351577 | 2.471124088 | -0.810227488 | 0.46565307 | 0.658102733 |
| Pcf11      | 65  | 1.221212588 | 1.009749039 | -0.211463548 | 0.46560348 | 0.658102733 |
| Mkln1      | 55  | 1.179457687 | 0.862547283 | -0.316910404 | 0.46565904 | 0.658102733 |
| Vezf1      | 87  | 1.469892937 | 1.714334438 | 0.244441501  | 0.46561195 | 0.658102733 |
| Stx11      | 38  | 0.95261711  | 1.140214073 | 0.187596964  | 0.46564747 | 0.658102733 |
| Mul1       | 43  | 1.775916845 | 1.598221479 | -0.177695365 | 0.46571549 | 0.65811913  |
| Snhg4      | 10  | 1.530458721 | 1.152290702 | -0.378168018 | 0.46599286 | 0.658300375 |
| Atxn2l     | 92  | 1.54734679  | 1.294367587 | -0.252979204 | 0.46602319 | 0.658300375 |
| Ccdc84     | 32  | 1.494017591 | 1.349630582 | -0.144387009 | 0.46601191 | 0.658300375 |
| Litaf      | 34  | 2.032014284 | 1.587961612 | -0.444052672 | 0.46595715 | 0.658300375 |
| Gm14325    | 2   | 8.013322884 | 7.061532888 | -0.951789996 | 0.46611871 | 0.658308554 |
| Neur14     | 104 | 1.133973158 | 1.115430406 | -0.018542751 | 0.46610696 | 0.658308554 |
| Pgap2      | 35  | 2.03221572  | 2.034730247 | 0.002514527  | 0.46622426 | 0.658330908 |
| Rab10      | 97  | 1.37913039  | 1.107508221 | -0.271622169 | 0.46620079 | 0.658330908 |
| Alg11      | 27  | 1.005882845 | 0.947943522 | -0.057939323 | 0.46627012 | 0.658332312 |
| Tomm34     | 60  | 1.536179944 | 1.300910538 | -0.235269406 | 0.46636639 | 0.658404885 |
| Ubn2       | 64  | 0.939805913 | 1.092171595 | 0.152365682  | 0.46652953 | 0.658571841 |
| Tram2      | 29  | 1.510774485 | 1.364686237 | -0.146088248 | 0.4666149  | 0.658628989 |
| Il1rapl2   | 11  | 37.38082989 | 40.09814358 | 2.717313687  | 0.46667087 | 0.658644637 |

|            |     |             |             |              |            |             |
|------------|-----|-------------|-------------|--------------|------------|-------------|
| Mkrn2      | 18  | 0.751341355 | 0.964475576 | 0.213134222  | 0.46679709 | 0.658759424 |
| Mir6966    | 4   | 71.31895417 | 72.82478682 | 1.505832649  | 0.4669465  | 0.658906912 |
| Supv3l1    | 31  | 1.287697362 | 1.272251697 | -0.015445665 | 0.46700645 | 0.658928144 |
| Ccdc32     | 15  | 1.752788702 | 2.077361012 | 0.32457231   | 0.46746797 | 0.659515915 |
| Pus7l      | 5   | 2.058729797 | 1.169092945 | -0.889636852 | 0.46774662 | 0.659591953 |
| Palm       | 30  | 1.038342581 | 1.09931637  | 0.060973789  | 0.46771121 | 0.659591953 |
| Sdf2       | 24  | 1.68508696  | 1.39308972  | -0.29199724  | 0.46764287 | 0.659591953 |
| Hoxd1      | 51  | 52.99434311 | 52.71872981 | -0.275613295 | 0.46774011 | 0.659591953 |
| Snord35b   | 20  | 1.166127211 | 1.32176357  | 0.155636359  | 0.46765756 | 0.659591953 |
| Ets1       | 33  | 1.320667742 | 1.252212567 | -0.068455175 | 0.46788316 | 0.659657718 |
| '00024G13F | 1   | 53.39805825 | 48.98989899 | -4.408159263 | 0.46786757 | 0.659657718 |
| Mex3d      | 119 | 1.221732982 | 1.030926667 | -0.190806314 | 0.46798577 | 0.659738998 |
| Ntn4       | 89  | 1.837757436 | 2.135164412 | 0.297406976  | 0.46813405 | 0.65988463  |
| Cep97      | 8   | 0           | 0.412087912 | 0.412087912  | 0.46823185 | 0.659959104 |
| Xbp1       | 41  | 1.307216777 | 0.998521498 | -0.308695279 | 0.46834109 | 0.660049666 |
| Dcp2       | 53  | 1.665068983 | 1.540508051 | -0.124560932 | 0.46841832 | 0.660095116 |
| Pdlim3     | 9   | 18.92695218 | 19.50696141 | 0.580009221  | 0.46854127 | 0.660141588 |
| Pex10      | 21  | 1.179094329 | 0.738867454 | -0.440226875 | 0.46852583 | 0.660141588 |
| Kdm5a      | 50  | 1.482451089 | 1.084745216 | -0.397705873 | 0.46866102 | 0.660246903 |
| Pcdhgc3    | 21  | 2.183999341 | 1.646040274 | -0.537959067 | 0.46888025 | 0.660492353 |
| Gltf       | 55  | 1.395806181 | 1.180811158 | -0.214995023 | 0.46899941 | 0.660596787 |
| Mir7687    | 68  | 1.752675932 | 1.674120143 | -0.078555789 | 0.4691964  | 0.660810827 |
| Srsf9      | 73  | 0.913731007 | 0.844254498 | -0.069476509 | 0.46925972 | 0.660836583 |
| Zc3h14     | 46  | 1.095872419 | 0.965130409 | -0.13074201  | 0.46947135 | 0.660993034 |
| Dhx57      | 15  | 1.554229481 | 1.772930719 | 0.218701238  | 0.46942286 | 0.660993034 |
| Pex7       | 49  | 1.065758165 | 0.943769383 | -0.121988782 | 0.46950596 | 0.660993034 |
| Nek11      | 17  | 0.959070759 | 0.857881702 | -0.101189057 | 0.46958839 | 0.661045671 |
| Por        | 43  | 1.714475509 | 1.705453448 | -0.00902206  | 0.46973808 | 0.66112954  |
| Zfp219     | 211 | 1.578583486 | 1.528052498 | -0.050530988 | 0.46970252 | 0.66112954  |
| Akap1      | 39  | 1.083895792 | 1.132448046 | 0.048552254  | 0.46981742 | 0.661177796 |
| Tctex1d2   | 15  | 1.927757556 | 1.483790858 | -0.443966698 | 0.46991671 | 0.661254106 |
| Bbx        | 34  | 0.878712695 | 1.011062655 | 0.13234996   | 0.46998451 | 0.661286094 |
| Ang        | 2   | 2.201257862 | 2.006799717 | -0.194458144 | 0.47018465 | 0.661355626 |
| R3hcc1l    | 36  | 1.266256766 | 1.30054487  | 0.034288104  | 0.47034793 | 0.661355626 |

|            |     |             |             |              |            |             |
|------------|-----|-------------|-------------|--------------|------------|-------------|
| I32416H05F | 54  | 1.976807332 | 2.050346174 | 0.073538842  | 0.47032086 | 0.661355626 |
| Snx10      | 5   | 2.120051086 | 1.084618981 | -1.035432105 | 0.47027982 | 0.661355626 |
| Bcl2l1     | 47  | 1.392089818 | 1.638386403 | 0.246296584  | 0.47039448 | 0.661355626 |
| Zfp672     | 45  | 1.512083469 | 1.215340363 | -0.296743105 | 0.47038617 | 0.661355626 |
| Rnase4     | 2   | 2.201257862 | 2.006799717 | -0.194458144 | 0.47018465 | 0.661355626 |
| Myadml2    | 4   | 9.173172794 | 9.843363325 | 0.670190531  | 0.47008308 | 0.661355626 |
| D17Wsu92e  | 62  | 1.329701215 | 1.284561944 | -0.045139271 | 0.47078508 | 0.661714583 |
| Cep44      | 2   | 0.505050505 | 0.676703934 | 0.171653429  | 0.47075849 | 0.661714583 |
| Pdcd2l     | 27  | 0.961262327 | 0.929442976 | -0.031819351 | 0.47072448 | 0.661714583 |
| Knstrn     | 27  | 1.267666449 | 0.946081971 | -0.321584479 | 0.47092484 | 0.661720872 |
| Prdx5      | 15  | 1.603972122 | 1.09018756  | -0.513784563 | 0.47087692 | 0.661720872 |
| Fzd5       | 75  | 1.586200233 | 1.353377838 | -0.232822396 | 0.47091567 | 0.661720872 |
| Tgfbr2     | 56  | 1.322962771 | 1.351142168 | 0.028179397  | 0.47111132 | 0.661912552 |
| Larp4      | 61  | 1.498215625 | 1.39039005  | -0.107825575 | 0.47121261 | 0.661912552 |
| Fam63a     | 27  | 1.700582587 | 1.302786819 | -0.397795769 | 0.47116034 | 0.661912552 |
| Whsc1l1    | 94  | 1.406042251 | 1.075374042 | -0.33066821  | 0.47124168 | 0.661912552 |
| Rraga      | 28  | 0.822865597 | 0.670245613 | -0.152619984 | 0.47150207 | 0.662214914 |
| Wdr76      | 1   | 3.937007874 | 2.222222222 | -1.714785652 | 0.47183817 | 0.662623537 |
| Ammecr1l   | 62  | 1.488814277 | 1.531429708 | 0.042615431  | 0.47203464 | 0.662709169 |
| Chd3os     | 14  | 61.78222096 | 61.38249644 | -0.399724515 | 0.47198412 | 0.662709169 |
| Tmem255a   | 5   | 17.85713006 | 21.59336057 | 3.736230508  | 0.47200753 | 0.662709169 |
| Gm5544     | 1   | 53.09734513 | 57.69230769 | 4.59496256   | 0.47217572 | 0.662843825 |
| Wdtdc1     | 62  | 1.48526771  | 1.535021511 | 0.049753801  | 0.47244616 | 0.663160034 |
| Polr2m     | 60  | 1.006258955 | 0.926010128 | -0.080248826 | 0.47269735 | 0.663330224 |
| Me2        | 103 | 1.354031067 | 1.29811732  | -0.055913747 | 0.47274823 | 0.663330224 |
| Pole3      | 4   | 1           | 0.396825397 | -0.603174603 | 0.47270916 | 0.663330224 |
| Atg16l2    | 23  | 1.263332585 | 1.179578856 | -0.083753728 | 0.47271973 | 0.663330224 |
| Kbtbd4     | 11  | 1.841109923 | 2.076925364 | 0.235815441  | 0.47291743 | 0.663440757 |
| Gm20753    | 7   | 1.754542359 | 1.754834462 | 0.000292103  | 0.47288496 | 0.663440757 |
| Al314180   | 75  | 0.961233353 | 0.895358079 | -0.065875274 | 0.4730978  | 0.663566918 |
| Smad7      | 104 | 1.51572195  | 1.31172714  | -0.20399481  | 0.47309153 | 0.663566918 |
| Serinc4    | 1   | 4.473684211 | 3.473945409 | -0.999738801 | 0.47333109 | 0.663830676 |
| Gtf2h3     | 24  | 0.884192808 | 0.541769815 | -0.342422994 | 0.47339336 | 0.663854569 |
| Mfsd2a     | 46  | 1.9508816   | 1.765455242 | -0.185426358 | 0.47346123 | 0.663886296 |

|         |     |             |             |              |            |             |
|---------|-----|-------------|-------------|--------------|------------|-------------|
| Ibtk    | 69  | 1.401161621 | 1.304721572 | -0.096440049 | 0.47381478 | 0.66431856  |
| Sidt1   | 7   | 10.07219491 | 11.60747028 | 1.535275372  | 0.47396767 | 0.664405957 |
| Med18   | 23  | 1.781749972 | 1.301941996 | -0.479807975 | 0.47392656 | 0.664405957 |
| Sec14l2 | 14  | 4.143948462 | 5.176543892 | 1.03259543   | 0.47403458 | 0.664436283 |
| Gm5468  | 7   | 2.105646265 | 1.445632441 | -0.660013824 | 0.47419701 | 0.664600476 |
| Zfp54   | 5   | 1.227304068 | 1.603520619 | 0.376216551  | 0.47453951 | 0.665016974 |
| Mir7045 | 95  | 1.859272686 | 1.595992648 | -0.263280038 | 0.47462711 | 0.66507622  |
| Dnajc16 | 51  | 1.057404703 | 0.851472832 | -0.205931871 | 0.47492489 | 0.665429941 |
| Tjp2    | 191 | 1.399623649 | 1.242318314 | -0.157305335 | 0.47502793 | 0.665510771 |
| Nek1    | 40  | 2.230058963 | 2.338158295 | 0.108099332  | 0.4751607  | 0.665591512 |
| Ndufaf6 | 41  | 1.672389751 | 1.438895467 | -0.233494284 | 0.47517628 | 0.665591512 |
| Slirp   | 1   | 3.459119497 | 4.559270517 | 1.10015102   | 0.47526178 | 0.665592146 |
| Txnip   | 33  | 1.647794539 | 1.521251113 | -0.126543425 | 0.47526745 | 0.665592146 |
| Lamtor5 | 20  | 1.313840863 | 1.346602048 | 0.032761185  | 0.47554194 | 0.665913004 |
| Schip1  | 51  | 1.758270492 | 1.599245297 | -0.159025195 | 0.4756592  | 0.666013656 |
| Mir6941 | 5   | 85.50839866 | 80.74081715 | -4.76758151  | 0.47589817 | 0.666284678 |
| Eif3b   | 61  | 0.853948734 | 0.905714752 | 0.051766017  | 0.47595033 | 0.66629414  |
| Prrc2b  | 39  | 1.068385965 | 1.298435282 | 0.230049317  | 0.4761317  | 0.666348548 |
| Dus3l   | 43  | 1.378109775 | 1.486626044 | 0.108516269  | 0.47635248 | 0.666348548 |
| Mier2   | 102 | 0.957106855 | 0.995354134 | 0.038247279  | 0.47624214 | 0.666348548 |
| Uqcrc1  | 13  | 1.801512159 | 1.680119552 | -0.121392607 | 0.47634238 | 0.666348548 |
| Med25   | 43  | 1.176377429 | 0.820466568 | -0.355910861 | 0.47624366 | 0.666348548 |
| Top2a   | 21  | 1.516752808 | 1.442951606 | -0.073801203 | 0.476238   | 0.666348548 |
| Mcfd2   | 61  | 1.204432478 | 1.296076493 | 0.091644015  | 0.47634285 | 0.666348548 |
| Cfap20  | 70  | 1.433219673 | 1.216966403 | -0.216253271 | 0.47624141 | 0.666348548 |
| Adck2   | 20  | 1.323898999 | 1.455546386 | 0.131647387  | 0.47640382 | 0.666356844 |
| Zfp523  | 60  | 0.991050105 | 1.006490503 | 0.015440398  | 0.47662744 | 0.666606082 |
| Mir7666 | 24  | 0.379792904 | 0.469295612 | 0.089502708  | 0.47688444 | 0.666711924 |
| Rabl6   | 70  | 1.255309989 | 1.299305396 | 0.043995407  | 0.47688485 | 0.666711924 |
| Champ1  | 39  | 1.381622995 | 1.054909078 | -0.326713917 | 0.47686289 | 0.666711924 |
| Wdr77   | 52  | 1.440506362 | 1.457846709 | 0.017340347  | 0.47683049 | 0.666711924 |
| Sap130  | 36  | 1.637470306 | 1.669621345 | 0.032151039  | 0.4771291  | 0.666862782 |
| Ccr4    | 1   | 91.73553719 | 89.87854251 | -1.85699468  | 0.47705908 | 0.666862782 |
| Mtcl1   | 112 | 1.400843422 | 1.280287034 | -0.120556387 | 0.47710656 | 0.666862782 |

|           |     |             |             |              |            |             |
|-----------|-----|-------------|-------------|--------------|------------|-------------|
| Atxn1     | 37  | 1.58280289  | 1.351164696 | -0.231638194 | 0.47733429 | 0.667086039 |
| Ccdc103   | 13  | 2.096290373 | 1.447606776 | -0.648683597 | 0.47742133 | 0.667144134 |
| Rnf4      | 53  | 1.261197791 | 1.280602761 | 0.01940497   | 0.47817724 | 0.668125312 |
| Dennd4b   | 11  | 1.116628785 | 1.315879184 | 0.199250399  | 0.47821454 | 0.668125312 |
| Uba3      | 32  | 0.987612097 | 1.043311939 | 0.055699842  | 0.4783892  | 0.6683057   |
| Akna      | 11  | 28.85888212 | 29.48110364 | 0.622221519  | 0.47866867 | 0.668632467 |
| Hint1     | 92  | 1.092880583 | 0.91312187  | -0.179758713 | 0.4787708  | 0.668711476 |
| Slc39a14  | 46  | 1.079365713 | 0.995590287 | -0.083775427 | 0.47904183 | 0.669026342 |
| Snord65   | 5   | 5.298749544 | 4.715007215 | -0.583742329 | 0.47911876 | 0.669070107 |
| Usp40     | 9   | 1.484226882 | 1.8853636   | 0.401136718  | 0.4794088  | 0.669411431 |
| Cdad1     | 18  | 2.559646452 | 2.079380111 | -0.480266342 | 0.47955112 | 0.669546438 |
| Ick       | 56  | 1.477471532 | 1.303920849 | -0.173550683 | 0.47978474 | 0.669554094 |
| Vps4b     | 38  | 1.454711938 | 1.215895843 | -0.238816095 | 0.47973292 | 0.669554094 |
| Dus1l     | 35  | 6.349385851 | 6.505383881 | 0.155998029  | 0.47960243 | 0.669554094 |
| Vps54     | 114 | 1.291642375 | 1.10034597  | -0.191296404 | 0.47974014 | 0.669554094 |
| Mir3086   | 3   | 1.243781095 | 1.560710195 | 0.3169291    | 0.47970148 | 0.669554094 |
| Cox8a     | 21  | 1.549309133 | 1.312426163 | -0.236882971 | 0.47985658 | 0.669590669 |
| Nanos1    | 73  | 1.340552667 | 1.201336294 | -0.139216373 | 0.47995738 | 0.66961325  |
| Erp29     | 42  | 1.135207592 | 1.259597024 | 0.124389432  | 0.47996403 | 0.66961325  |
| 10022A10F | 18  | 1.788125504 | 1.351867583 | -0.436257921 | 0.48012574 | 0.669721563 |
| Bcs1l     | 24  | 1.645123736 | 1.526451112 | -0.118672624 | 0.48013295 | 0.669721563 |
| 33418N02F | 49  | 1.525919052 | 1.605653106 | 0.079734054  | 0.48022775 | 0.669790131 |
| Sec61g    | 23  | 1.084887581 | 1.437521573 | 0.352633993  | 0.4803268  | 0.669864607 |
| Sfxn2     | 21  | 1.24337392  | 1.262368283 | 0.018994363  | 0.48053124 | 0.670041167 |
| Nbeal1    | 84  | 1.60422772  | 1.260250429 | -0.343977291 | 0.48054472 | 0.670041167 |
| Ap2b1     | 50  | 1.705470912 | 1.901842286 | 0.196371374  | 0.48064735 | 0.670081178 |
| Ccdc18    | 24  | 0.867741    | 0.626244023 | -0.241496977 | 0.48066475 | 0.670081178 |
| Mboat2    | 81  | 1.492909199 | 1.636185889 | 0.14327669   | 0.48084915 | 0.670274567 |
| Cadm1     | 70  | 1.291621468 | 1.34645111  | 0.054829642  | 0.48098474 | 0.670399889 |
| Trappc4   | 30  | 1.359576607 | 1.385746391 | 0.026169784  | 0.48121232 | 0.670653388 |
| Hsbp1     | 48  | 3.419607347 | 3.009438988 | -0.41016836  | 0.48147177 | 0.67093764  |
| Snx11     | 34  | 1.335288117 | 1.153246215 | -0.182041903 | 0.48150772 | 0.67093764  |
| Dmap1     | 8   | 2.15480564  | 2.314463416 | 0.159657776  | 0.48155604 | 0.670941257 |
| Ccdc102a  | 61  | 1.633600162 | 1.387578107 | -0.246022055 | 0.48192483 | 0.67126388  |

|            |     |             |             |              |            |             |
|------------|-----|-------------|-------------|--------------|------------|-------------|
| Psemb5     | 14  | 1.394574737 | 1.470641673 | 0.076066936  | 0.48185598 | 0.67126388  |
| Zfp141     | 2   | 2.978723404 | 2           | -0.978723404 | 0.48190498 | 0.67126388  |
| Ctnna1     | 65  | 1.106223228 | 1.151799001 | 0.045575773  | 0.48199092 | 0.67129221  |
| Elf2       | 281 | 1.302373173 | 1.246524078 | -0.055849095 | 0.48209342 | 0.671371244 |
| Lrpprc     | 32  | 1.181348938 | 0.904169335 | -0.277179603 | 0.48221906 | 0.67148249  |
| Wbp4       | 102 | 1.511261426 | 1.325945243 | -0.185316184 | 0.48227075 | 0.671490744 |
| Zbed6      | 19  | 1.864892476 | 1.530033485 | -0.334858991 | 0.48241789 | 0.671576556 |
| Angel1     | 31  | 1.490839582 | 1.481289616 | -0.009549966 | 0.48242391 | 0.671576556 |
| Esam       | 16  | 37.45040847 | 37.35250661 | -0.097901862 | 0.48258743 | 0.671740466 |
| Acbd6      | 53  | 1.34649715  | 1.370559458 | 0.024062308  | 0.48269423 | 0.671761676 |
| Chd1       | 102 | 1.247400101 | 1.144606771 | -0.102793329 | 0.48266756 | 0.671761676 |
| Snciaip    | 86  | 41.85711338 | 41.68829564 | -0.168817736 | 0.48291921 | 0.672002877 |
| Arhgap18   | 5   | 1.491955551 | 1.932692833 | 0.440737282  | 0.48295913 | 0.672002877 |
| Zfp593     | 40  | 1.535470301 | 1.287151434 | -0.248318867 | 0.48310544 | 0.672142712 |
| Prmt6      | 73  | 3.820843059 | 3.777171773 | -0.043671286 | 0.48343826 | 0.672478241 |
| Diap1      | 57  | 1.241563662 | 1.273870278 | 0.032306616  | 0.4834056  | 0.672478241 |
| Zfp516     | 75  | 1.963925248 | 1.679531388 | -0.28439386  | 0.48355787 | 0.672580868 |
| Slc25a22   | 10  | 1.458888327 | 0.95260426  | -0.506284066 | 0.48371871 | 0.672740812 |
| Chchd5     | 22  | 1.33685271  | 1.667282133 | 0.330429422  | 0.48395575 | 0.672815419 |
| Psmid9     | 18  | 2.027985909 | 2.170454399 | 0.142468489  | 0.48394523 | 0.672815419 |
| Apol7d     | 22  | 1.298578286 | 1.179990193 | -0.118588093 | 0.48395362 | 0.672815419 |
| Fam179a    | 3   | 67.49341528 | 62.89469193 | -4.59872335  | 0.48387122 | 0.672815419 |
| Mfge8      | 22  | 1.882668639 | 1.893101828 | 0.010433189  | 0.48407289 | 0.672914511 |
| Ifnar2     | 38  | 1.153758957 | 1.368843164 | 0.215084207  | 0.48421061 | 0.673042204 |
| Sfxn1      | 67  | 1.147216087 | 0.923229286 | -0.223986801 | 0.48463071 | 0.67356232  |
| Birc3      | 16  | 1.707402418 | 1.549703657 | -0.157698761 | 0.48470026 | 0.673595191 |
| Noa1       | 31  | 0.928904765 | 0.867845845 | -0.061058921 | 0.48482507 | 0.673652532 |
| Tatdn2     | 105 | 0.90126438  | 0.929540129 | 0.028275748  | 0.48483334 | 0.673652532 |
| Ccnd1      | 33  | 1.166784754 | 1.103050474 | -0.06373428  | 0.48521605 | 0.674056644 |
| Ppox       | 4   | 1.948339017 | 3.227998641 | 1.279659624  | 0.48521019 | 0.674056644 |
| Tmx4       | 37  | 1.371770781 | 1.033717582 | -0.338053199 | 0.48526399 | 0.67405943  |
| Tnks2      | 54  | 1.26496997  | 0.97771771  | -0.287252261 | 0.48538104 | 0.674093637 |
| i00015A07F | 9   | 2.051655415 | 2.747717863 | 0.696062449  | 0.48565612 | 0.674093637 |
| Gm21992    | 8   | 1.954743955 | 1.672282675 | -0.28246128  | 0.48550329 | 0.674093637 |

|            |     |             |             |              |            |             |
|------------|-----|-------------|-------------|--------------|------------|-------------|
| Rbm14      | 8   | 1.954743955 | 1.672282675 | -0.28246128  | 0.48550329 | 0.674093637 |
| Eps15      | 44  | 1.374575146 | 1.454414207 | 0.079839061  | 0.48559405 | 0.674093637 |
| BC031181   | 18  | 1.953384381 | 1.637125574 | -0.316258807 | 0.48565153 | 0.674093637 |
| Ppm1g      | 36  | 1.056871414 | 1.247192587 | 0.190321173  | 0.48535587 | 0.674093637 |
| Lgals3     | 11  | 0.917634223 | 0.921597801 | 0.003963578  | 0.48556989 | 0.674093637 |
| Pus7       | 39  | 1.05776902  | 0.897075206 | -0.160693814 | 0.48582706 | 0.674267118 |
| 130047H15F | 26  | 0.556873415 | 0.805905271 | 0.249031855  | 0.48592663 | 0.674341531 |
| Gfod2      | 34  | 2.737375633 | 3.385797699 | 0.648422066  | 0.48597799 | 0.674346063 |
| Churc1     | 19  | 1.179842104 | 1.266380118 | 0.086538014  | 0.48606776 | 0.674346063 |
| Bola2      | 26  | 1.036778956 | 1.040426749 | 0.003647793  | 0.48606494 | 0.674346063 |
| Ctnnb1     | 135 | 1.634044289 | 1.500994046 | -0.133050243 | 0.4862164  | 0.67443925  |
| Nup205     | 81  | 0.951419044 | 0.982532355 | 0.031113311  | 0.48622685 | 0.67443925  |
| Pbxip1     | 2   | 4.651442308 | 6.486676017 | 1.835233709  | 0.48641399 | 0.674635054 |
| Wsb2       | 54  | 1.622872384 | 1.287832979 | -0.335039405 | 0.48648454 | 0.674669141 |
| Dalrd3     | 19  | 8.747851728 | 9.189923101 | 0.442071373  | 0.48656666 | 0.67471925  |
| Kif2a      | 138 | 1.198980999 | 1.127022494 | -0.071958506 | 0.48668246 | 0.674752308 |
| Abrac1     | 17  | 2.297359096 | 1.60806174  | -0.689297356 | 0.48666768 | 0.674752308 |
| Zfp217     | 113 | 5.69345603  | 5.471719419 | -0.221736612 | 0.48695062 | 0.675060311 |
| Dgcr14     | 34  | 1.282518929 | 1.320938793 | 0.038419865  | 0.48711989 | 0.675231186 |
| Pigf       | 21  | 0.904363034 | 0.845026098 | -0.059336936 | 0.48741395 | 0.675511177 |
| Rac1       | 93  | 1.131559181 | 1.079580866 | -0.051978315 | 0.48738529 | 0.675511177 |
| Cep57l1    | 30  | 1.296801424 | 1.320353982 | 0.023552558  | 0.48755476 | 0.675581149 |
| Tsga10     | 101 | 1.292468073 | 1.258483146 | -0.033984928 | 0.48755652 | 0.675581149 |
| Rplp0      | 21  | 1.079652968 | 1.369261904 | 0.289608937  | 0.48772852 | 0.675691874 |
| Cep192     | 39  | 1.399724739 | 1.222922667 | -0.176802073 | 0.487718   | 0.675691874 |
| Surf1      | 11  | 1.100419857 | 1.046130961 | -0.054288896 | 0.48778411 | 0.675705087 |
| Idh3a      | 44  | 1.348685392 | 1.290720455 | -0.057964937 | 0.48792857 | 0.6758414   |
| Insig2     | 37  | 1.745206286 | 1.199236025 | -0.545970261 | 0.48805903 | 0.675923211 |
| Map3k10    | 38  | 1.162653711 | 0.972999393 | -0.189654318 | 0.48807976 | 0.675923211 |
| Limd2      | 105 | 1.912993017 | 1.498072572 | -0.414920445 | 0.48821145 | 0.676041785 |
| Spcs3      | 72  | 1.044190813 | 0.955025408 | -0.089165405 | 0.48839829 | 0.676046664 |
| Edc3       | 13  | 1.785401734 | 1.978806801 | 0.193405067  | 0.48832603 | 0.676046664 |
| Bcl2l13    | 21  | 1.075487148 | 1.037048119 | -0.038439029 | 0.48841223 | 0.676046664 |
| Inpp4b     | 16  | 2.304433704 | 1.724044726 | -0.580388978 | 0.48843736 | 0.676046664 |



|          |     |             |             |              |            |             |
|----------|-----|-------------|-------------|--------------|------------|-------------|
| Zdhhc2   | 103 | 1.185482017 | 1.086794126 | -0.098687891 | 0.48844533 | 0.676046664 |
| AA474331 | 20  | 8.210615521 | 7.687075037 | -0.523540484 | 0.4885544  | 0.676133852 |
| Gramd2   | 2   | 31.61846596 | 28.519939   | -3.098526955 | 0.48860712 | 0.676143047 |
| Rpa2     | 37  | 1.411914146 | 1.193659224 | -0.218254922 | 0.48890838 | 0.676338343 |
| Btf3     | 77  | 1.060773758 | 1.176288823 | 0.115515066  | 0.48884211 | 0.676338343 |
| Sesn1    | 77  | 1.548361176 | 1.508019436 | -0.04034174  | 0.4889016  | 0.676338343 |
| Hiatl1   | 18  | 0.914048574 | 0.838917431 | -0.075131143 | 0.48893261 | 0.676338343 |
| Ints10   | 18  | 2.277662529 | 1.85916097  | -0.418501558 | 0.48903097 | 0.676394457 |
| Rmnd5a   | 65  | 1.28126419  | 1.212732849 | -0.068531341 | 0.48906537 | 0.676394457 |
| Mtx3     | 14  | 6.691266194 | 6.178323556 | -0.512942638 | 0.48920815 | 0.676528174 |
| Mir6909  | 3   | 98.67000093 | 98.62538428 | -0.044616649 | 0.48927856 | 0.676561779 |
| Uri1     | 87  | 1.032963528 | 1.087688925 | 0.054725396  | 0.4893994  | 0.676665105 |
| Vti1b    | 69  | 1.85883681  | 1.804197195 | -0.054639615 | 0.48944881 | 0.67666966  |
| Rabggta  | 26  | 1.653412635 | 1.364817187 | -0.288595448 | 0.48975414 | 0.677028006 |
| Hectd3   | 56  | 1.342846891 | 1.355407207 | 0.012560316  | 0.49043242 | 0.677901777 |
| Ist1     | 47  | 1.672620084 | 1.719578566 | 0.046958482  | 0.49080304 | 0.678350176 |
| Catsperd | 4   | 11.15796042 | 10.21126761 | -0.946692815 | 0.490944   | 0.678481089 |
| Ralgapa2 | 53  | 0.992374721 | 0.883542984 | -0.108831736 | 0.49099246 | 0.678484169 |
| Ulbp1    | 1   | 58.58585859 | 54.19354839 | -4.392310199 | 0.49127939 | 0.678816738 |
| Sh3yl1   | 4   | 1.315789474 | 0.3125      | -1.003289474 | 0.49136355 | 0.678861458 |
| Sun2     | 78  | 1.26031483  | 1.185446595 | -0.074868235 | 0.49140428 | 0.678861458 |
| Zfp184   | 20  | 1.02805671  | 1.244459049 | 0.216402339  | 0.49150943 | 0.678942808 |
| Thra     | 75  | 1.592262513 | 1.521172366 | -0.071090147 | 0.49156854 | 0.678960544 |
| Ucp2     | 36  | 1.882507942 | 1.526392572 | -0.356115369 | 0.49202438 | 0.679526191 |
| Asb8     | 51  | 1.490586416 | 1.292090214 | -0.198496202 | 0.4922708  | 0.679536751 |
| Snx9     | 133 | 0.991033525 | 0.818479089 | -0.172554436 | 0.49224406 | 0.679536751 |
| Mnat1    | 1   | 3.225806452 | 2.051282051 | -1.1745244   | 0.49230988 | 0.679536751 |
| Eif3j1   | 8   | 1.430695966 | 0.679483796 | -0.751212171 | 0.49214377 | 0.679536751 |
| Snrpf    | 8   | 1.76056338  | 1.181469298 | -0.579094082 | 0.49208934 | 0.679536751 |
| Akirin1  | 74  | 1.682609859 | 1.654200482 | -0.028409376 | 0.49228318 | 0.679536751 |
| Gch1     | 49  | 1.551761985 | 1.301756063 | -0.250005922 | 0.4923628  | 0.679545879 |
| Uba6     | 61  | 1.270899753 | 1.325478813 | 0.05457906   | 0.49265566 | 0.679677515 |
| Tmem135  | 25  | 1.481247855 | 1.207231845 | -0.27401601  | 0.49251777 | 0.679677515 |
| Ska2     | 3   | 1.72201722  | 1.883465996 | 0.161448776  | 0.49262257 | 0.679677515 |

|            |     |             |             |              |            |             |
|------------|-----|-------------|-------------|--------------|------------|-------------|
| Zbed5      | 9   | 1.599024931 | 1.530271655 | -0.068753277 | 0.49264025 | 0.679677515 |
| Snhg6      | 25  | 1.053114034 | 1.158708592 | 0.105594558  | 0.49272888 | 0.679677515 |
| 300002E11F | 5   | 2.442656019 | 1.851988719 | -0.5906673   | 0.49273609 | 0.679677515 |
| Gpr107     | 13  | 1.329736078 | 0.816205386 | -0.513530691 | 0.49290395 | 0.679845147 |
| Mir678     | 1   | 95.74468085 | 97.59036145 | 1.845680595  | 0.49324364 | 0.680185813 |
| Tmem167    | 44  | 1.58885492  | 1.486378873 | -0.102476047 | 0.4932092  | 0.680185813 |
| Tmem183a   | 52  | 1.391891536 | 1.297840778 | -0.094050757 | 0.49332938 | 0.680240111 |
| Tbc1d7     | 32  | 1.430460134 | 1.501076652 | 0.070616518  | 0.49341524 | 0.680294583 |
| Tbc1d23    | 13  | 1.712507122 | 2.388387346 | 0.675880225  | 0.49356277 | 0.68030623  |
| Pard6b     | 52  | 1.327904328 | 1.270338938 | -0.05756539  | 0.49355244 | 0.68030623  |
| Tor1b      | 41  | 1.325223775 | 0.980783696 | -0.344440079 | 0.49350142 | 0.68030623  |
| Acox1      | 16  | 0.966873584 | 0.736461764 | -0.23041182  | 0.49366102 | 0.680313841 |
| Otulin     | 36  | 0.99000731  | 1.310089865 | 0.320082556  | 0.49364612 | 0.680313841 |
| Lrwd1      | 52  | 1.875925376 | 1.841857951 | -0.034067425 | 0.49374799 | 0.6803698   |
| Ipo11      | 17  | 1.755328386 | 1.426111294 | -0.329217092 | 0.49396193 | 0.680600691 |
| Clk4       | 46  | 1.32897962  | 0.893203426 | -0.435776194 | 0.49416116 | 0.680754241 |
| Hspa9      | 82  | 1.271267023 | 1.123610242 | -0.147656781 | 0.49416616 | 0.680754241 |
| B4galt1    | 11  | 2.558562421 | 1.586946923 | -0.971615499 | 0.49424592 | 0.68080021  |
| Ptrf       | 25  | 2.089472399 | 1.745592067 | -0.343880331 | 0.49440149 | 0.680925705 |
| Shank1     | 19  | 5.484839991 | 6.744509377 | 1.259669386  | 0.49442983 | 0.680925705 |
| Narf       | 31  | 1.646084522 | 1.585238202 | -0.060846321 | 0.49452616 | 0.680994444 |
| Gpc2       | 18  | 7.234295491 | 8.343523085 | 1.109227594  | 0.49473288 | 0.681215191 |
| Ccdc28b    | 3   | 13.46186906 | 12.70891277 | -0.752956285 | 0.49494394 | 0.681441865 |
| Tpcn1      | 26  | 2.028095052 | 1.994320277 | -0.033774774 | 0.4950783  | 0.681540633 |
| Fth1       | 9   | 0.14199648  | 0.831550044 | 0.689553565  | 0.49510857 | 0.681540633 |
| Synrg      | 56  | 1.60545106  | 1.43854318  | -0.166907881 | 0.49530768 | 0.681750762 |
| Nos1ap     | 105 | 1.398550611 | 1.360283864 | -0.038266747 | 0.49545488 | 0.681889408 |
| Chadl      | 4   | 78.42114641 | 79.86881559 | 1.447669184  | 0.49555641 | 0.681965187 |
| Ptger1     | 2   | 42.19982724 | 39.29227941 | -2.907547827 | 0.49611732 | 0.682673061 |
| Ptpn9      | 47  | 0.873985392 | 0.997618742 | 0.12363335   | 0.49624153 | 0.682703222 |
| Fancm      | 73  | 1.024221126 | 1.045230946 | 0.02100982   | 0.49623361 | 0.682703222 |
| Ggnbp2os   | 25  | 1.860611242 | 1.60137745  | -0.259233792 | 0.49632534 | 0.682703222 |
| Rnpepl1    | 140 | 1.01488564  | 0.979740527 | -0.035145113 | 0.49630264 | 0.682703222 |
| Dennd1a    | 26  | 1.030627677 | 0.86717105  | -0.163456627 | 0.49674777 | 0.683220238 |

|            |     |             |             |              |            |             |
|------------|-----|-------------|-------------|--------------|------------|-------------|
| Nt5dc1     | 27  | 1.852608484 | 1.82108128  | -0.031527204 | 0.49688314 | 0.683342374 |
| Crat       | 37  | 1.968393874 | 1.840445804 | -0.12794807  | 0.49701647 | 0.683461688 |
| Amn1       | 23  | 6.260839087 | 6.514414562 | 0.253575474  | 0.49721011 | 0.683663905 |
| Ctdnep1    | 16  | 1.457797373 | 1.195720246 | -0.262077126 | 0.49777535 | 0.684292718 |
| Nbr1       | 3   | 0.490196078 | 0           | -0.490196078 | 0.49779743 | 0.684292718 |
| Hnrnmp     | 17  | 0.424836601 | 0.444977503 | 0.020140901  | 0.49780733 | 0.684292718 |
| Ss18l1     | 42  | 0.8658014   | 0.621248789 | -0.244552611 | 0.49786469 | 0.684307458 |
| Tspan4     | 75  | 1.341870923 | 1.516862785 | 0.174991862  | 0.49813789 | 0.684490622 |
| Egln2      | 67  | 1.870553892 | 1.477532007 | -0.393021885 | 0.49807564 | 0.684490622 |
| Mogs       | 65  | 0.947635375 | 1.015032276 | 0.067396901  | 0.49810308 | 0.684490622 |
| Trafd1     | 49  | 1.272922911 | 1.039220629 | -0.233702282 | 0.49835232 | 0.684721153 |
| Triap1     | 20  | 2.070418789 | 1.826693314 | -0.243725475 | 0.49848486 | 0.684736648 |
| Nat10      | 43  | 1.812999694 | 1.530642684 | -0.28235701  | 0.49847002 | 0.684736648 |
| Irs2       | 103 | 0.956037561 | 1.018528888 | 0.062491327  | 0.49855025 | 0.684736648 |
| Trmt2a     | 22  | 1.245255047 | 1.041236101 | -0.204018947 | 0.4985259  | 0.684736648 |
| Zfp706     | 74  | 1.269836841 | 1.194149776 | -0.075687065 | 0.49863414 | 0.684787768 |
| Rab6b      | 40  | 6.211497552 | 7.645591435 | 1.434093883  | 0.4987242  | 0.684847361 |
| L30026L21F | 13  | 43.34221402 | 39.13810641 | -4.204107606 | 0.49902057 | 0.685190218 |
| Ccno       | 57  | 2.038768874 | 1.754678529 | -0.284090345 | 0.49908783 | 0.685218456 |
| Hmox1      | 19  | 1.867760123 | 2.071616144 | 0.203856021  | 0.49919142 | 0.68529656  |
| Htra2      | 62  | 1.338200445 | 1.26995109  | -0.068249355 | 0.49924133 | 0.685300965 |
| Vps13d     | 20  | 0.503681821 | 0.672054805 | 0.168372984  | 0.49952213 | 0.685622276 |
| Endog      | 15  | 1.206767543 | 1.432203542 | 0.225435999  | 0.50022233 | 0.68651912  |
| Mipep      | 33  | 1.545516572 | 1.554894609 | 0.009378037  | 0.50042803 | 0.686672992 |
| Fmn2       | 11  | 34.85873098 | 35.68767308 | 0.828942101  | 0.50040625 | 0.686672992 |
| Selk       | 36  | 1.628538797 | 1.385146333 | -0.243392464 | 0.50054951 | 0.686775453 |
| Grcc10     | 5   | 1.880005671 | 1.147720154 | -0.732285517 | 0.50090186 | 0.68719464  |
| Ccdc130    | 33  | 4.379387304 | 4.546621393 | 0.167234088  | 0.50106273 | 0.68728683  |
| I31434O11F | 25  | 1.528236447 | 1.627808475 | 0.099572029  | 0.50106029 | 0.68728683  |
| Ccng1      | 20  | 2.163106204 | 2.087965573 | -0.075140631 | 0.50132072 | 0.687576435 |
| Prkacb     | 80  | 1.538953932 | 1.421329258 | -0.117624674 | 0.50154712 | 0.687758379 |
| Rer1       | 69  | 1.112457227 | 1.092451886 | -0.020005342 | 0.50151852 | 0.687758379 |
| Bbs4       | 11  | 1.122115239 | 1.370709691 | 0.248594452  | 0.50168218 | 0.687879298 |
| Papd7      | 211 | 1.103200929 | 0.999900329 | -0.1033006   | 0.50188275 | 0.688090018 |

|            |     |             |             |              |            |             |
|------------|-----|-------------|-------------|--------------|------------|-------------|
| F2rl1      | 43  | 2.369269715 | 2.177211478 | -0.192058237 | 0.50206606 | 0.688277034 |
| Sh3rf1     | 68  | 4.18595368  | 3.423185944 | -0.762767736 | 0.50224923 | 0.688306366 |
| Taf7       | 35  | 2.153264463 | 2.234972415 | 0.081707952  | 0.50224679 | 0.688306366 |
| Hcn3       | 46  | 4.678556292 | 5.072504513 | 0.393948221  | 0.50221635 | 0.688306366 |
| I00057B20F | 3   | 98.84057971 | 98.34494076 | -0.495638948 | 0.50231257 | 0.688306366 |
| Naa25      | 55  | 1.163437851 | 0.998540009 | -0.164897841 | 0.50232199 | 0.688306366 |
| AA414768   | 6   | 10.76123386 | 9.071773637 | -1.689460226 | 0.50253919 | 0.688539689 |
| I30405A21F | 35  | 0.996090822 | 0.554844739 | -0.441246083 | 0.50279959 | 0.688832156 |
| Tfrc       | 27  | 2.155853005 | 1.641349045 | -0.51450396  | 0.50285006 | 0.688836989 |
| Ly75       | 20  | 1.547670932 | 1.509348607 | -0.038322325 | 0.50293066 | 0.688883092 |
| Mdn1       | 39  | 0.879818103 | 0.961857875 | 0.082039772  | 0.50312723 | 0.68908801  |
| Agpat6     | 91  | 1.616725072 | 1.53678913  | -0.079935942 | 0.50321013 | 0.689137227 |
| Sreb2      | 29  | 1.236565539 | 1.378461287 | 0.141895747  | 0.50338241 | 0.689244521 |
| Dtnbp1     | 91  | 1.075675417 | 1.072192304 | -0.003483113 | 0.50335909 | 0.689244521 |
| Taf5       | 23  | 1.796997123 | 1.654497003 | -0.142500119 | 0.50365453 | 0.689552767 |
| Ube2g1     | 86  | 1.010008447 | 1.079965649 | 0.069957203  | 0.50384611 | 0.689686368 |
| Trim46     | 7   | 4.215273376 | 3.632954063 | -0.582319313 | 0.50381805 | 0.689686368 |
| Gm16712    | 3   | 0           | 0.617283951 | 0.617283951  | 0.50407621 | 0.689872631 |
| Gm38431    | 10  | 1.125374591 | 0.872355336 | -0.253019255 | 0.50407151 | 0.689872631 |
| .20014N23F | 27  | 2.162656328 | 1.925131257 | -0.237525071 | 0.50424658 | 0.689977088 |
| Fbxo38     | 23  | 1.148331144 | 0.738114587 | -0.410216558 | 0.50421012 | 0.689977088 |
| Ebna1bp2   | 6   | 2.948548153 | 2.629911817 | -0.318636336 | 0.504433   | 0.690100019 |
| Gm20604    | 30  | 1.399489585 | 1.219351042 | -0.180138543 | 0.5045894  | 0.690100019 |
| Cfap57     | 6   | 2.948548153 | 2.629911817 | -0.318636336 | 0.504433   | 0.690100019 |
| I30015G10F | 17  | 1.102932581 | 0.915823968 | -0.187108613 | 0.50464276 | 0.690100019 |
| AK010878   | 30  | 1.399489585 | 1.219351042 | -0.180138543 | 0.5045894  | 0.690100019 |
| Atg14      | 28  | 1.261783521 | 1.436187083 | 0.174403562  | 0.50451597 | 0.690100019 |
| Arpp19     | 59  | 1.197199097 | 1.129210647 | -0.06798845  | 0.50466562 | 0.690100019 |
| Cox20      | 77  | 1.119829445 | 1.062446364 | -0.057383081 | 0.5047136  | 0.690101314 |
| Il34       | 5   | 32.88870008 | 35.37432687 | 2.485626785  | 0.5049972  | 0.690424763 |
| Polr2e     | 40  | 1.525272821 | 1.3453605   | -0.17991232  | 0.50505463 | 0.690438951 |
| Rnf32      | 7   | 0.216450216 | 0.458986175 | 0.242535959  | 0.50527191 | 0.690562384 |
| Slc25a29   | 56  | 1.7171917   | 1.28047004  | -0.43672166  | 0.50528611 | 0.690562384 |
| Srsf10     | 126 | 1.334009245 | 1.225495611 | -0.108513634 | 0.5052761  | 0.690562384 |

|            |     |             |             |              |            |             |
|------------|-----|-------------|-------------|--------------|------------|-------------|
| Plekhh1    | 75  | 1.634203221 | 1.345339212 | -0.288864009 | 0.50547325 | 0.690689493 |
| Slc22a23   | 127 | 1.614061635 | 1.326870979 | -0.287190656 | 0.50545313 | 0.690689493 |
| Tmem65     | 131 | 1.409789773 | 1.313987016 | -0.095802757 | 0.50553431 | 0.690708609 |
| 700112J16R | 13  | 2.687980384 | 2.011049131 | -0.676931254 | 0.50559458 | 0.690726648 |
| Eif3j2     | 48  | 1.439224799 | 1.311105556 | -0.128119243 | 0.50607065 | 0.691248318 |
| Plscr4     | 10  | 0.799138621 | 0.902547439 | 0.103408818  | 0.50606274 | 0.691248318 |
| Ipo7       | 45  | 1.286438165 | 1.261092605 | -0.02534556  | 0.50621642 | 0.691254398 |
| Btd        | 15  | 2.378494706 | 2.034664424 | -0.343830283 | 0.50617802 | 0.691254398 |
| 131414P19F | 20  | 0.951503329 | 0.775282546 | -0.176220783 | 0.50613114 | 0.691254398 |
| Zfp473     | 15  | 2.655466235 | 2.162245883 | -0.493220351 | 0.50631448 | 0.691259651 |
| Get4       | 56  | 0.683507119 | 0.69001922  | 0.006512101  | 0.50630974 | 0.691259651 |
| Hdgf       | 81  | 1.160443118 | 1.262574636 | 0.102131518  | 0.50665145 | 0.691655354 |
| 30509E16F  | 11  | 1.006466419 | 1.761023948 | 0.75455753   | 0.50677628 | 0.691761412 |
| Khsrp      | 47  | 1.583762435 | 1.584615994 | 0.000853559  | 0.50693691 | 0.691916302 |
| Katnbl1    | 61  | 1.705390832 | 1.778956192 | 0.07356536   | 0.50705536 | 0.691968225 |
| Cct7       | 44  | 1.021729712 | 1.221512026 | 0.199782314  | 0.50706926 | 0.691968225 |
| Ptgds      | 2   | 92.10526316 | 92.65328269 | 0.548019533  | 0.50712902 | 0.691985421 |
| Lpin2      | 67  | 1.408715134 | 1.206397068 | -0.202318066 | 0.50730484 | 0.692160968 |
| Nlk        | 75  | 1.639914442 | 1.647736229 | 0.007821787  | 0.50740859 | 0.692238162 |
| Tbrg4      | 69  | 1.682929982 | 1.484212545 | -0.198717437 | 0.50770454 | 0.692577529 |
| Utp11l     | 27  | 1.694109843 | 1.318905076 | -0.375204767 | 0.5078764  | 0.692656254 |
| Ralgapb    | 60  | 1.089247339 | 1.092832076 | 0.003584736  | 0.50792256 | 0.692656254 |
| Rps8       | 19  | 1.187945872 | 0.982608263 | -0.205337608 | 0.50794351 | 0.692656254 |
| Abcc4      | 77  | 0.979315529 | 0.994270969 | 0.01495544   | 0.50795107 | 0.692656254 |
| .10038B12F | 19  | 1.582695745 | 1.591042485 | 0.008346739  | 0.50824658 | 0.692994828 |
| Trim75     | 1   | 96.86098655 | 97.76536313 | 0.904376581  | 0.5083628  | 0.693007324 |
| Trim68     | 24  | 1.222299973 | 1.103440393 | -0.11885958  | 0.50831633 | 0.693007324 |
| Rad50      | 36  | 1.187598594 | 1.142706806 | -0.044891788 | 0.50842541 | 0.693007324 |
| Ccdc25     | 30  | 1.114143495 | 1.048662299 | -0.065481197 | 0.50844465 | 0.693007324 |
| Anks1      | 56  | 1.368189676 | 1.35719942  | -0.010990255 | 0.50860844 | 0.69316618  |
| Particl    | 12  | 0.725763678 | 0.77899694  | 0.053233261  | 0.50874848 | 0.693292648 |
| Rsrc1      | 23  | 1.132132315 | 1.01268309  | -0.119449225 | 0.50886957 | 0.693328882 |
| Trak2      | 18  | 0.882399443 | 0.880434035 | -0.001965408 | 0.50883095 | 0.693328882 |
| Sap30      | 34  | 1.012373371 | 0.587952978 | -0.424420392 | 0.50912139 | 0.693519747 |

|           |     |             |             |              |            |             |
|-----------|-----|-------------|-------------|--------------|------------|-------------|
| Ndufaf2   | 33  | 1.768088762 | 1.681456263 | -0.0866325   | 0.50909851 | 0.693519747 |
| Zcchc9    | 15  | 1.344873885 | 1.025005043 | -0.319868842 | 0.50915144 | 0.693519747 |
| Ptgs2     | 1   | 3.301886792 | 2.262443439 | -1.039443354 | 0.50942056 | 0.693815647 |
| Slc12a2   | 158 | 1.261873636 | 1.163027755 | -0.098845881 | 0.50946324 | 0.693815647 |
| Rnf149    | 81  | 1.081292192 | 0.841971409 | -0.239320783 | 0.50969905 | 0.694061244 |
| Map4      | 76  | 1.274576761 | 1.367781725 | 0.093204964  | 0.50973818 | 0.694061244 |
| Chmp7     | 37  | 1.174875287 | 1.273543231 | 0.098667944  | 0.50988497 | 0.694193272 |
| Heatr6    | 41  | 1.088097419 | 0.9375849   | -0.150512519 | 0.50992976 | 0.694193272 |
| Tnk2      | 89  | 1.998286333 | 1.866974869 | -0.131311464 | 0.51018141 | 0.694471424 |
| Erbp2ip   | 216 | 1.245138415 | 1.20298094  | -0.042157475 | 0.51062214 | 0.694967553 |
| Pvrl3     | 114 | 1.092438522 | 1.123710665 | 0.031272143  | 0.5106406  | 0.694967553 |
| 33408J17R | 16  | 2.002110457 | 1.375537686 | -0.626572771 | 0.51082536 | 0.695154539 |
| Lmo4      | 85  | 1.350201443 | 1.469092719 | 0.118891276  | 0.51096387 | 0.695214076 |
| Cic       | 62  | 1.539751877 | 1.528574704 | -0.011177173 | 0.51093623 | 0.695214076 |
| Zfp119a   | 4   | 1.360544218 | 1.645397613 | 0.284853395  | 0.51135921 | 0.695687476 |
| Dstyk     | 60  | 1.416675736 | 1.463071581 | 0.046395845  | 0.51167223 | 0.696048789 |
| Ulk2      | 64  | 0.962329804 | 0.849717035 | -0.112612769 | 0.51189299 | 0.696284557 |
| AA415398  | 45  | 1.315274551 | 1.154769478 | -0.160505073 | 0.51194326 | 0.696288391 |
| Riok3     | 32  | 1.07333225  | 1.565746425 | 0.492414175  | 0.51216124 | 0.696391223 |
| Gadd45g   | 29  | 1.181170011 | 1.128869219 | -0.052300792 | 0.51214956 | 0.696391223 |
| Rasd1     | 44  | 3.730095083 | 3.969852826 | 0.239757743  | 0.51213842 | 0.696391223 |
| Strn      | 67  | 1.42826259  | 1.313779125 | -0.114483465 | 0.5122975  | 0.696511955 |
| Wdr83     | 22  | 1.787847191 | 2.094878813 | 0.307031622  | 0.51252459 | 0.69670874  |
| Med26     | 51  | 1.135720376 | 1.071592915 | -0.064127461 | 0.5125372  | 0.69670874  |
| Ppip5k2   | 24  | 1.777336427 | 1.376492451 | -0.400843976 | 0.51289581 | 0.697131634 |
| Polr2c    | 27  | 1.132530074 | 0.790664806 | -0.341865267 | 0.513063   | 0.697294288 |
| Btc       | 7   | 2.852484293 | 2.254751657 | -0.597732636 | 0.51311126 | 0.697295301 |
| Ctage5    | 123 | 1.178310437 | 1.163500139 | -0.014810298 | 0.51363034 | 0.697914253 |
| Cep83     | 76  | 1.050490891 | 1.061887756 | 0.011396865  | 0.51370941 | 0.697914253 |
| Papola    | 44  | 1.649334122 | 1.68970098  | 0.040366858  | 0.51368083 | 0.697914253 |
| Ulk4      | 32  | 1.506670884 | 1.376144918 | -0.130525966 | 0.51386301 | 0.69803688  |
| Cyb561d2  | 3   | 1.025641026 | 1.485220954 | 0.459579928  | 0.51389481 | 0.69803688  |
| Wdhd1     | 61  | 1.371297651 | 1.122122652 | -0.249174999 | 0.51412044 | 0.698205367 |
| Pigyl     | 57  | 1.924607168 | 1.736762784 | -0.187844384 | 0.51410016 | 0.698205367 |

|           |     |             |             |              |            |             |
|-----------|-----|-------------|-------------|--------------|------------|-------------|
| Asap2     | 67  | 9.208449399 | 9.532993606 | 0.324544207  | 0.51416159 | 0.698205367 |
| Pik3r1    | 90  | 4.105759115 | 4.006454069 | -0.099305046 | 0.51424669 | 0.698256314 |
| L2hgdh    | 13  | 1.558782114 | 1.659319801 | 0.100537687  | 0.51433395 | 0.698310179 |
| Ccdc105   | 9   | 21.47548201 | 24.89907347 | 3.423591463  | 0.51442803 | 0.698373289 |
| Socs6     | 49  | 1.087617397 | 1.050301464 | -0.037315933 | 0.51450782 | 0.698416992 |
| BC020402  | 39  | 1.075264436 | 1.031295403 | -0.043969033 | 0.51467247 | 0.698575883 |
| 10039018F | 67  | 1.6064892   | 1.445043069 | -0.161446131 | 0.5148157  | 0.698705663 |
| Mir7653   | 7   | 1.415729406 | 1.44609442  | 0.030365013  | 0.51498574 | 0.698742556 |
| Gm13889   | 34  | 9.672396174 | 11.06555435 | 1.39315818   | 0.51493889 | 0.698742556 |
| Ppp4r2    | 57  | 0.94898361  | 1.080817717 | 0.131834107  | 0.51491844 | 0.698742556 |
| Ttc4      | 12  | 0.503017123 | 0.579101896 | 0.076084773  | 0.51518568 | 0.698826691 |
| Cdca5     | 33  | 1.098547501 | 1.197908801 | 0.099361299  | 0.51519062 | 0.698826691 |
| Al118078  | 48  | 1.457730099 | 1.241556279 | -0.21617382  | 0.5151806  | 0.698826691 |
| Rprd1b    | 28  | 0.760329547 | 0.869653654 | 0.109324108  | 0.51531082 | 0.698925133 |
| Dmwd      | 105 | 1.289933095 | 1.468087422 | 0.178154327  | 0.51547856 | 0.69904171  |
| Atp6v0c   | 29  | 1.482601469 | 1.359740007 | -0.122861462 | 0.51549205 | 0.69904171  |
| Hus1      | 20  | 1.269155131 | 1.655716641 | 0.38656151   | 0.51561356 | 0.699141879 |
| Tecpr1    | 37  | 1.383961123 | 1.10659032  | -0.277370803 | 0.51602446 | 0.699246744 |
| Pdzd8     | 95  | 1.205689406 | 1.164811388 | -0.040878018 | 0.51588572 | 0.699246744 |
| Pdcd4     | 49  | 1.711552169 | 1.511277766 | -0.200274403 | 0.51599311 | 0.699246744 |
| Rab38     | 25  | 2.374314706 | 2.281362215 | -0.092952491 | 0.51597239 | 0.699246744 |
| Slc25a4   | 41  | 1.118810534 | 1.151626317 | 0.032815783  | 0.51597561 | 0.699246744 |
| Jrk       | 42  | 1.59302355  | 1.508616847 | -0.084406703 | 0.51600752 | 0.699246744 |
| lqcg      | 5   | 3.802677942 | 4.552255732 | 0.74957779   | 0.5159576  | 0.699246744 |
| 33434E20F | 10  | 2.251900462 | 2.343192726 | 0.091292263  | 0.5163649  | 0.699643453 |
| 30208H11F | 46  | 1.732980263 | 1.539135462 | -0.193844801 | 0.51651598 | 0.699783533 |
| Luc7l     | 20  | 1.378515143 | 1.402078027 | 0.023562884  | 0.51659309 | 0.69982339  |
| Atg10     | 33  | 1.228323789 | 1.628524478 | 0.400200689  | 0.5169028  | 0.70017831  |
| 30455B14F | 1   | 12.37113402 | 10.75268817 | -1.618445849 | 0.51713221 | 0.700295131 |
| Tiparp    | 126 | 1.341228288 | 1.278520867 | -0.062707422 | 0.51709353 | 0.700295131 |
| Thap1     | 42  | 1.369732208 | 1.201974144 | -0.167758064 | 0.51710698 | 0.700295131 |
| Ap2s1     | 18  | 1.804053521 | 1.329469108 | -0.474584412 | 0.5174254  | 0.700498236 |
| Rpe       | 21  | 1.388416932 | 1.4576952   | 0.069278268  | 0.51740452 | 0.700498236 |
| Mir6975   | 8   | 2.097794025 | 2.088403298 | -0.009390726 | 0.51737846 | 0.700498236 |

|             |     |             |             |              |            |             |
|-------------|-----|-------------|-------------|--------------|------------|-------------|
| Slc15a4     | 52  | 0.993782474 | 0.781865894 | -0.21191658  | 0.51771785 | 0.700764853 |
| Psmb1       | 28  | 1.200055062 | 0.927345964 | -0.272709099 | 0.51770218 | 0.700764853 |
| Idua        | 17  | 1.817409895 | 1.225725902 | -0.591683993 | 0.51833207 | 0.701531531 |
| Helb        | 8   | 2.744183271 | 3.102908846 | 0.358725575  | 0.51864615 | 0.70189188  |
| Mapk11      | 52  | 1.871869468 | 1.946748695 | 0.074879227  | 0.51888836 | 0.70215491  |
| Dtd1        | 24  | 1.125412493 | 1.288305442 | 0.162892949  | 0.5189379  | 0.702157186 |
| L10004E09F  | 68  | 1.131429551 | 1.166702472 | 0.035272921  | 0.51900158 | 0.702178605 |
| Rimbp3      | 1   | 34.93975904 | 31.81818182 | -3.121577218 | 0.51936903 | 0.702462867 |
| Agpat2      | 43  | 7.197321872 | 6.245365643 | -0.951956228 | 0.51937572 | 0.702462867 |
| Kctd19      | 4   | 35.79594836 | 34.72178165 | -1.074166709 | 0.51934817 | 0.702462867 |
| Ogfrl1      | 78  | 1.584525075 | 1.721933648 | 0.137408572  | 0.51940317 | 0.702462867 |
| Inca1       | 57  | 1.615048183 | 1.436130517 | -0.178917665 | 0.51973262 | 0.702843657 |
| Stk25       | 64  | 1.468793364 | 1.260522679 | -0.208270686 | 0.5198984  | 0.703003054 |
| Slc10a7     | 14  | 0.767299159 | 0.731651635 | -0.035647525 | 0.52025516 | 0.703379785 |
| Mir6405     | 1   | 6.787330317 | 5.384615385 | -1.402714932 | 0.52029353 | 0.703379785 |
| Fxr2        | 59  | 1.179167854 | 1.037159436 | -0.142008418 | 0.52032081 | 0.703379785 |
| Stx17       | 45  | 1.492066944 | 1.255655497 | -0.236411447 | 0.52044841 | 0.703487473 |
| Dap         | 24  | 1.126786214 | 1.189932271 | 0.063146057  | 0.5206505  | 0.703695807 |
| Epn1        | 57  | 1.915071023 | 1.491359532 | -0.423711491 | 0.52082176 | 0.703797631 |
| Plxna1      | 134 | 1.840960083 | 1.627631109 | -0.213328974 | 0.52078127 | 0.703797631 |
| Dhrs3       | 33  | 1.174611771 | 1.0633627   | -0.11124907  | 0.52088261 | 0.703815041 |
| Csrp2bp     | 36  | 1.182903766 | 1.458306102 | 0.275402336  | 0.52115074 | 0.704112506 |
| Slc22a15    | 76  | 1.352158053 | 1.208731271 | -0.143426782 | 0.52146472 | 0.704419739 |
| Y17H6S56E-1 | 19  | 0.598292099 | 0.723106549 | 0.12481445   | 0.52147415 | 0.704419739 |
| Sec61b      | 4   | 0.668918619 | 0.962937368 | 0.29401875   | 0.52157755 | 0.704494564 |
| 30043M19F   | 46  | 1.402587593 | 1.241118046 | -0.161469548 | 0.52171301 | 0.704612674 |
| Tmem123     | 10  | 0.447761194 | 1.338957387 | 0.891196193  | 0.52225893 | 0.705090404 |
| Cnot7       | 49  | 2.138217225 | 2.042150901 | -0.096066324 | 0.52223069 | 0.705090404 |
| Sptlc2      | 85  | 1.597936205 | 1.283764302 | -0.314171903 | 0.5222078  | 0.705090404 |
| Thap2       | 32  | 1.511305242 | 1.328654425 | -0.182650817 | 0.52217192 | 0.705090404 |
| Tle2        | 19  | 2.368138076 | 2.803099024 | 0.434960948  | 0.52241132 | 0.705231249 |
| Parp2       | 5   | 2.715529753 | 3.521758198 | 0.806228445  | 0.52265007 | 0.705488648 |
| Timmdc1     | 29  | 1.187397774 | 0.863779518 | -0.323618256 | 0.52275076 | 0.705559662 |
| Fibp        | 11  | 1.264158608 | 1.351211453 | 0.087052845  | 0.52296181 | 0.705649806 |



|          |     |             |             |              |            |             |
|----------|-----|-------------|-------------|--------------|------------|-------------|
| Abhd16a  | 45  | 1.202971946 | 1.161462049 | -0.041509898 | 0.52293859 | 0.705649806 |
| Sod1     | 41  | 1.43046835  | 1.165676092 | -0.264792258 | 0.52292489 | 0.705649806 |
| Rasa2    | 98  | 1.058838138 | 0.944175774 | -0.114662364 | 0.5231462  | 0.705711211 |
| Rfx7     | 83  | 1.20215954  | 1.279269577 | 0.077110037  | 0.52309863 | 0.705711211 |
| Pdpr     | 50  | 1.161692188 | 1.053955603 | -0.107736585 | 0.5231516  | 0.705711211 |
| Specc1   | 73  | 2.118133621 | 1.752045835 | -0.366087786 | 0.52350927 | 0.706128783 |
| Rad17    | 60  | 1.202351636 | 1.09878374  | -0.103567895 | 0.52357369 | 0.706150762 |
| Tfpt     | 5   | 1.191757323 | 1.043133486 | -0.148623837 | 0.5237995  | 0.706195687 |
| Pemt     | 25  | 1.430938126 | 1.433431678 | 0.002493551  | 0.5237718  | 0.706195687 |
| Hnrnpab  | 70  | 0.820244667 | 0.953057087 | 0.13281242   | 0.52374727 | 0.706195687 |
| Nckap1   | 116 | 1.566934729 | 1.463823488 | -0.103111241 | 0.52375376 | 0.706195687 |
| Mrpl51   | 52  | 1.517312358 | 1.35357303  | -0.163739327 | 0.52425606 | 0.7067463   |
| Rufy4    | 41  | 1.198915935 | 1.279699333 | 0.080783399  | 0.52437327 | 0.706839372 |
| Map3k5   | 141 | 1.030790854 | 0.949516261 | -0.081274594 | 0.5244729  | 0.706908727 |
| Mxd3     | 55  | 1.217291439 | 1.193869318 | -0.023422121 | 0.52458924 | 0.707000595 |
| Nmi      | 12  | 1.051352003 | 1.237642839 | 0.186290836  | 0.52473954 | 0.707138211 |
| Actr3b   | 25  | 6.86338967  | 6.599182449 | -0.264207221 | 0.52494246 | 0.707346709 |
| Ehbp1l1  | 19  | 1.329714505 | 1.349524183 | 0.019809678  | 0.52506736 | 0.707450044 |
| Cops6    | 4   | 1.557320919 | 2.587221199 | 1.02990028   | 0.52513911 | 0.707481759 |
| Slc25a54 | 1   | 96.32352941 | 97.65625    | 1.332720588  | 0.52527716 | 0.70753783  |
| Asic4    | 14  | 10.43878577 | 9.508575837 | -0.930209928 | 0.52525235 | 0.70753783  |
| Mir3083  | 87  | 1.4019345   | 1.432684052 | 0.030749552  | 0.52547203 | 0.707735338 |
| Zfp207   | 2   | 0.980392157 | 1.948051948 | 0.967659791  | 0.52558356 | 0.707820593 |
| Pcyt1a   | 77  | 3.455912142 | 3.249441356 | -0.206470786 | 0.52572736 | 0.70794928  |
| Dusp3    | 13  | 1.543816301 | 0.995624076 | -0.548192225 | 0.52585588 | 0.708057371 |
| Gm15800  | 28  | 1.828853271 | 1.848553292 | 0.019700021  | 0.526047   | 0.70818474  |
| Capn10   | 25  | 1.576722354 | 1.5813391   | 0.004616747  | 0.52601131 | 0.70818474  |
| Pak6     | 64  | 14.72801589 | 15.5008839  | 0.772868006  | 0.52626336 | 0.708280934 |
| Apoo     | 4   | 26.75364248 | 25.25402325 | -1.499619229 | 0.52634275 | 0.708280934 |
| Emc10    | 29  | 0.831977978 | 1.078817616 | 0.246839638  | 0.52635979 | 0.708280934 |
| Dnaja1   | 72  | 1.679503881 | 1.359027613 | -0.320476268 | 0.52632645 | 0.708280934 |
| Zfp758   | 5   | 1.511299435 | 1.799808429 | 0.288508994  | 0.52623885 | 0.708280934 |
| Gstk1    | 20  | 13.42973691 | 12.86322319 | -0.566513714 | 0.52641349 | 0.708288245 |
| Chd1l    | 15  | 1.004516394 | 1.082782823 | 0.078266429  | 0.52649307 | 0.708330366 |

|            |     |             |             |              |            |             |
|------------|-----|-------------|-------------|--------------|------------|-------------|
| Comt       | 17  | 0.926487096 | 1.252328795 | 0.325841699  | 0.52663037 | 0.708450135 |
| Prr22      | 2   | 80.94983656 | 80.1429733  | -0.806863258 | 0.526832   | 0.708656407 |
| Gm4532     | 64  | 1.271695421 | 1.256331707 | -0.015363714 | 0.52723255 | 0.709130194 |
| Vps26b     | 22  | 1.662169858 | 1.318995166 | -0.343174692 | 0.52735345 | 0.709167825 |
| Leng8      | 29  | 1.178214998 | 1.084498767 | -0.093716232 | 0.52745384 | 0.709167825 |
| Ticrr      | 35  | 1.598800102 | 1.527582138 | -0.071217964 | 0.52742884 | 0.709167825 |
| Mrpl36     | 10  | 1.948276858 | 2.821167623 | 0.872890765  | 0.52742832 | 0.709167825 |
| Ddx18      | 9   | 1.655062273 | 1.717227112 | 0.062164839  | 0.52775589 | 0.709508931 |
| Ermap      | 2   | 62.20960405 | 65.1935644  | 2.983960343  | 0.52795534 | 0.709665764 |
| Chchd3     | 21  | 1.098912676 | 0.768064656 | -0.33084802  | 0.52796928 | 0.709665764 |
| Trim65     | 21  | 5.451665216 | 4.602852529 | -0.848812687 | 0.52803302 | 0.709686444 |
| Tcf19      | 29  | 1.376317312 | 1.595340367 | 0.219023055  | 0.52843637 | 0.709846422 |
| Serp1      | 18  | 1.286244315 | 1.068894801 | -0.217349513 | 0.5284423  | 0.709846422 |
| Mbd5       | 4   | 3.376580173 | 5.492125984 | 2.115545811  | 0.52820376 | 0.709846422 |
| Cox5a      | 93  | 1.177995187 | 1.111551591 | -0.066443596 | 0.52838314 | 0.709846422 |
| '00012C14F | 16  | 51.54682971 | 51.67959797 | 0.132768251  | 0.52829298 | 0.709846422 |
| Cchcr1     | 29  | 1.376317312 | 1.595340367 | 0.219023055  | 0.52843637 | 0.709846422 |
| Gpatch3    | 57  | 2.941363677 | 3.67534772  | 0.733984043  | 0.52859482 | 0.709986308 |
| Rnf166     | 85  | 1.317572752 | 1.178838372 | -0.13873438  | 0.52875875 | 0.71014149  |
| 30581F22F  | 22  | 1.167560959 | 0.808246347 | -0.359314612 | 0.52884054 | 0.710186333 |
| Timm9      | 44  | 2.058041768 | 1.615934913 | -0.442106855 | 0.52891062 | 0.710215452 |
| Mir1898    | 2   | 79.14473684 | 78.71794872 | -0.426788124 | 0.52911906 | 0.710430325 |
| Traf4      | 56  | 1.376513979 | 1.278417795 | -0.098096184 | 0.52916791 | 0.710430915 |
| Fbxw4      | 100 | 1.767948569 | 1.51514569  | -0.252802879 | 0.52936215 | 0.710626669 |
| Mcee       | 34  | 1.750694111 | 1.316677338 | -0.434016773 | 0.52941331 | 0.710630345 |
| Acsf2      | 21  | 3.347665453 | 5.063092843 | 1.715427391  | 0.52953969 | 0.710734963 |
| Med9       | 24  | 0.692816396 | 1.07248344  | 0.379667044  | 0.52972635 | 0.710920469 |
| Tsc1       | 34  | 1.532681482 | 1.5387751   | 0.006093618  | 0.53017794 | 0.711146031 |
| Timeless   | 16  | 11.86766586 | 11.95457014 | 0.086904283  | 0.53005708 | 0.711146031 |
| Mrps12     | 6   | 2.121601017 | 2.464496577 | 0.34289556   | 0.5300175  | 0.711146031 |
| Zfand5     | 103 | 1.057195397 | 0.936324855 | -0.120870542 | 0.5301852  | 0.711146031 |
| Lym4       | 7   | 0.98912787  | 0.630335292 | -0.358792578 | 0.53009178 | 0.711146031 |
| Zfp101     | 16  | 1.013255526 | 0.957694374 | -0.055561152 | 0.5301027  | 0.711146031 |
| Gmps       | 56  | 1.267025517 | 1.323408596 | 0.056383079  | 0.53031357 | 0.711222429 |

|            |     |             |             |              |            |             |
|------------|-----|-------------|-------------|--------------|------------|-------------|
| Ythdc1     | 72  | 1.105244807 | 0.969877127 | -0.135367681 | 0.53033909 | 0.711222429 |
| Cadm2      | 17  | 35.68775285 | 36.17242046 | 0.484667605  | 0.53054396 | 0.711302153 |
| Api5       | 80  | 0.900721836 | 0.83486244  | -0.065859396 | 0.53050659 | 0.711302153 |
| Tceb3      | 69  | 0.913558571 | 0.999432874 | 0.085874303  | 0.53050797 | 0.711302153 |
| Mrpl49     | 14  | 1.152891062 | 1.092766356 | -0.060124706 | 0.53061219 | 0.711328633 |
| Uchl3      | 80  | 1.233623113 | 1.277690628 | 0.044067515  | 0.5310728  | 0.711881091 |
| Pth2       | 2   | 32.31474408 | 29.82115923 | -2.493584847 | 0.53121284 | 0.712003768 |
| Dbi        | 24  | 1.275716217 | 1.047020835 | -0.228695382 | 0.53136552 | 0.712143357 |
| Vps26a     | 30  | 1.777924483 | 1.560626897 | -0.217297586 | 0.53169765 | 0.712523405 |
| Ncbp1      | 33  | 1.15002843  | 0.648076619 | -0.501951812 | 0.53175604 | 0.712534801 |
| 333432I09R | 1   | 95.65217391 | 96.90721649 | 1.255042582  | 0.53194894 | 0.712534801 |
| Ubl5       | 7   | 1.980687326 | 1.979162769 | -0.001524557 | 0.53192103 | 0.712534801 |
| Stau2      | 66  | 1.45128958  | 1.361058364 | -0.090231217 | 0.5318943  | 0.712534801 |
| Pdcd11     | 25  | 0.963096598 | 0.891542449 | -0.071554149 | 0.53188766 | 0.712534801 |
| Dcaf17     | 15  | 0.906038897 | 0.922293995 | 0.016255098  | 0.53231412 | 0.712893807 |
| 310410L24F | 25  | 1.063272794 | 1.151407389 | 0.088134594  | 0.53230591 | 0.712893807 |
| Wrnip1     | 64  | 1.054641682 | 1.111842861 | 0.057201179  | 0.5323982  | 0.712941337 |
| Tchp       | 21  | 0.956840058 | 1.048484823 | 0.091644764  | 0.53262536 | 0.713037876 |
| Mtif2      | 18  | 2.678170143 | 2.606184392 | -0.071985751 | 0.53257913 | 0.713037876 |
| Dnajb9     | 49  | 1.068252452 | 0.94614957  | -0.122102882 | 0.53252092 | 0.713037876 |
| Ckap2      | 58  | 1.267091657 | 1.106895981 | -0.160195676 | 0.53266466 | 0.713037876 |
| Tti2       | 5   | 2.935903376 | 2.564661426 | -0.37124195  | 0.53286666 | 0.713243221 |
| Nup93      | 34  | 0.933176072 | 0.851026769 | -0.082149304 | 0.53304586 | 0.713418003 |
| Git1       | 105 | 1.078551649 | 1.156609225 | 0.078057577  | 0.53336484 | 0.713714728 |
| Cdkn1a     | 12  | 1.847592627 | 2.018962139 | 0.171369512  | 0.53335892 | 0.713714728 |
| Nr1h2      | 19  | 1.346681955 | 1.514982606 | 0.168300651  | 0.53346659 | 0.713785794 |
| Ppapdc1b   | 12  | 1.345883431 | 1.397443095 | 0.051559664  | 0.53364729 | 0.71396247  |
| Naa11      | 32  | 91.83692422 | 91.93072348 | 0.093799266  | 0.53381405 | 0.714055363 |
| Rap1b      | 123 | 1.027545212 | 0.797793936 | -0.229751277 | 0.53380291 | 0.714055363 |
| Gprc5d     | 1   | 98.41897233 | 97.65625    | -0.762722332 | 0.53386341 | 0.714056303 |
| Taf6l      | 8   | 2.530047873 | 2.005777532 | -0.524270341 | 0.53393562 | 0.7140878   |
| Homer1     | 135 | 1.333093253 | 1.195856862 | -0.137236391 | 0.53404265 | 0.714165843 |
| Qsox2      | 30  | 0.673515326 | 0.511590795 | -0.161924531 | 0.53414151 | 0.714232955 |
| Wasf1      | 73  | 1.058812113 | 1.002004787 | -0.056807325 | 0.53432013 | 0.714406708 |

|            |     |             |             |              |            |             |
|------------|-----|-------------|-------------|--------------|------------|-------------|
| I30016H08F | 28  | 1.894433567 | 1.434574412 | -0.459859154 | 0.53442562 | 0.714482645 |
| Ict1       | 44  | 1.655096    | 1.362329152 | -0.292766848 | 0.53460265 | 0.71452402  |
| Naa20      | 68  | 1.27694711  | 1.119626782 | -0.157320328 | 0.53452465 | 0.71452402  |
| Gng2       | 5   | 62.11290456 | 60.93334548 | -1.179559085 | 0.53458315 | 0.71452402  |
| Mier1      | 117 | 0.958927782 | 0.985182549 | 0.026254766  | 0.5349432  | 0.71478387  |
| Mina       | 29  | 1.63652943  | 1.671091868 | 0.034562438  | 0.53489185 | 0.71478387  |
| Plxdc1     | 32  | 3.796707271 | 3.274530984 | -0.522176287 | 0.53491584 | 0.71478387  |
| Farp2      | 30  | 1.061052229 | 1.151166608 | 0.090114379  | 0.53554254 | 0.715454414 |
| Cope       | 11  | 0.825705126 | 0.915145841 | 0.089440715  | 0.53552571 | 0.715454414 |
| Mtmr10     | 55  | 1.214072691 | 1.322574967 | 0.108502276  | 0.53592083 | 0.71589461  |
| Filip1l    | 57  | 1.443143668 | 1.188360501 | -0.254783166 | 0.53607792 | 0.715974101 |
| Ndst1      | 15  | 92.8496459  | 91.81685121 | -1.032794687 | 0.53606163 | 0.715974101 |
| I30512B01F | 4   | 1.619187264 | 1.169851036 | -0.449336228 | 0.53646621 | 0.716427476 |
| Ago2       | 114 | 1.085264293 | 1.26211711  | 0.176852818  | 0.53693855 | 0.716993019 |
| Psat1      | 31  | 1.324129952 | 1.158945933 | -0.165184019 | 0.53705345 | 0.717057878 |
| Gapdh      | 15  | 2.071984034 | 2.280148574 | 0.20816454   | 0.53708485 | 0.717057878 |
| Rxra       | 166 | 1.433692089 | 1.306422236 | -0.127269853 | 0.53716532 | 0.717100058 |
| Fam219b    | 35  | 1.222555124 | 1.354551697 | 0.131996573  | 0.53766347 | 0.717699786 |
| Pih1d2     | 45  | 1.354898956 | 1.195706333 | -0.159192623 | 0.53773693 | 0.717732552 |
| Il20ra     | 25  | 13.22309284 | 13.31050111 | 0.087408267  | 0.5380423  | 0.718074827 |
| Smarcc1    | 84  | 1.17019956  | 1.438554163 | 0.268354603  | 0.53826406 | 0.718240134 |
| Ppm1b      | 48  | 0.868803536 | 0.760727475 | -0.108076061 | 0.53821813 | 0.718240134 |
| Snpc2      | 27  | 0.641423624 | 0.773005769 | 0.131582145  | 0.53843701 | 0.718405597 |
| Ddx23      | 27  | 1.352023971 | 1.788531302 | 0.436507331  | 0.53864285 | 0.718599902 |
| Coa5       | 15  | 1.238323328 | 1.231546118 | -0.00677721  | 0.53868059 | 0.718599902 |
| Mir1894    | 2   | 0.403225806 | 1.219512195 | 0.816286389  | 0.53877639 | 0.718662367 |
| Phospho1   | 79  | 2.688732869 | 2.47495338  | -0.213779489 | 0.53903464 | 0.718745506 |
| Slc25a44   | 2   | 1.842105263 | 2.443991853 | 0.60188659   | 0.53900932 | 0.718745506 |
| Snord68    | 65  | 1.549016761 | 1.541794106 | -0.007222655 | 0.53893036 | 0.718745506 |
| Pfdn5      | 11  | 2.79452963  | 2.893648917 | 0.099119287  | 0.53900541 | 0.718745506 |
| Rps6ka2    | 55  | 1.511298502 | 1.465375798 | -0.045922704 | 0.53940024 | 0.71903698  |
| Tbpl1      | 119 | 1.442473126 | 1.407553238 | -0.034919889 | 0.53939075 | 0.71903698  |
| Kif21b     | 33  | 2.615901378 | 3.134367254 | 0.518465876  | 0.53935373 | 0.71903698  |
| Rab1       | 45  | 1.401783108 | 1.475822085 | 0.074038977  | 0.53945414 | 0.71904352  |

|            |     |             |             |              |            |             |
|------------|-----|-------------|-------------|--------------|------------|-------------|
| Styx       | 25  | 1.0095105   | 0.954303649 | -0.055206851 | 0.53953231 | 0.719082386 |
| Rpl27a     | 4   | 3.17953568  | 2.533083211 | -0.646452468 | 0.5398569  | 0.719319005 |
| Atad3a     | 43  | 1.409290571 | 1.402530894 | -0.006759677 | 0.53982563 | 0.719319005 |
| Snora3     | 4   | 3.17953568  | 2.533083211 | -0.646452468 | 0.5398569  | 0.719319005 |
| Sox13      | 48  | 0.819663678 | 0.908677294 | 0.089013616  | 0.53995028 | 0.719378097 |
| Shisa4     | 12  | 2.161603766 | 1.501938346 | -0.659665421 | 0.54013103 | 0.71955358  |
| Ralgs2     | 68  | 0.990541655 | 0.839443395 | -0.15109826  | 0.54026818 | 0.719670959 |
| 130467K11F | 17  | 1.135011337 | 0.679562601 | -0.455448736 | 0.54039175 | 0.719770221 |
| Pbld2      | 25  | 1.371719432 | 1.294825498 | -0.076893934 | 0.54051464 | 0.719868568 |
| Gpr135     | 40  | 16.55775266 | 16.7831955  | 0.225442835  | 0.5406591  | 0.71993321  |
| Zmym1      | 19  | 0.715442698 | 0.838153138 | 0.12271044   | 0.54071037 | 0.71993321  |
| Mpnd       | 39  | 1.273899921 | 1.15926788  | -0.114632041 | 0.54067465 | 0.71993321  |
| Dars2      | 12  | 1.54378462  | 1.282053914 | -0.261730706 | 0.54090732 | 0.72013011  |
| Agbl3      | 51  | 1.022151171 | 0.850324268 | -0.171826903 | 0.54105673 | 0.720263678 |
| Hist1h1d   | 4   | 2.484238357 | 1.784989066 | -0.699249291 | 0.54115836 | 0.72033361  |
| Rwdd1      | 65  | 1.436455517 | 1.121920597 | -0.314534921 | 0.54141774 | 0.720416064 |
| Trp53bp2   | 82  | 1.100627937 | 1.123277463 | 0.022649526  | 0.54162126 | 0.720416064 |
| Snora7a    | 32  | 1.104786091 | 1.262119093 | 0.157333001  | 0.54166215 | 0.720416064 |
| Prpf3      | 45  | 1.130547961 | 1.097490681 | -0.03305728  | 0.54157889 | 0.720416064 |
| Rpl32      | 32  | 1.104786091 | 1.262119093 | 0.157333001  | 0.54166215 | 0.720416064 |
| Mum1       | 19  | 1.851005588 | 1.14273432  | -0.708271268 | 0.54162409 | 0.720416064 |
| Cenph      | 20  | 1.297397405 | 1.499527584 | 0.202130179  | 0.54159839 | 0.720416064 |
| Mgst3      | 5   | 1.052631579 | 1.271754983 | 0.219123404  | 0.54152835 | 0.720416064 |
| 110010H24F | 89  | 1.170351166 | 1.067603374 | -0.102747791 | 0.54134014 | 0.720416064 |
| Mdh1       | 11  | 1.197063614 | 1.114838346 | -0.082225268 | 0.54182458 | 0.720500332 |
| Golim4     | 28  | 1.856815947 | 1.349165035 | -0.507650912 | 0.54191907 | 0.720500332 |
| Ccdc112    | 56  | 1.916506019 | 1.773064001 | -0.143442018 | 0.54182782 | 0.720500332 |
| Rtn4ip1    | 6   | 1.204285935 | 1.290751179 | 0.086465244  | 0.54192191 | 0.720500332 |
| Mus81      | 7   | 2.066638452 | 1.646232524 | -0.420405928 | 0.54218213 | 0.720650408 |
| BC055324   | 8   | 1.215519643 | 1.450324792 | 0.234805149  | 0.54210896 | 0.720650408 |
| Fam208a    | 84  | 3.353877767 | 3.229780085 | -0.124097682 | 0.54213375 | 0.720650408 |
| Ski        | 215 | 1.325246322 | 1.259222096 | -0.066024226 | 0.5423758  | 0.720682949 |
| Zbtb9      | 57  | 0.832034746 | 1.067965321 | 0.235930575  | 0.54231881 | 0.720682949 |
| Rpp25l     | 47  | 1.412734467 | 1.354770195 | -0.057964272 | 0.54235537 | 0.720682949 |

|          |     |             |             |              |            |             |
|----------|-----|-------------|-------------|--------------|------------|-------------|
| Ddi2     | 66  | 0.997941474 | 0.937503346 | -0.060438128 | 0.54240306 | 0.720682949 |
| Mir8102  | 42  | 1.442390891 | 1.468644064 | 0.026253173  | 0.5425952  | 0.720872971 |
| Tcf20    | 12  | 19.93668815 | 21.55795475 | 1.621266603  | 0.54286411 | 0.721164938 |
| Noc3l    | 34  | 1.317464724 | 1.432384561 | 0.114919837  | 0.54311085 | 0.721427416 |
| Arhgap26 | 87  | 1.650263581 | 1.400096004 | -0.250167577 | 0.54330489 | 0.721565016 |
| Ak6      | 86  | 1.119699684 | 1.146833291 | 0.027133606  | 0.54331279 | 0.721565016 |
| Hnrnpf   | 191 | 1.868843792 | 1.805867694 | -0.062976098 | 0.54355094 | 0.721815968 |
| Kirrel3  | 37  | 2.340965497 | 2.021845674 | -0.319119823 | 0.54379264 | 0.722001044 |
| Wasl     | 69  | 1.067310079 | 0.869576068 | -0.197734011 | 0.54378718 | 0.722001044 |
| Rnf215   | 20  | 1.666535557 | 1.18937337  | -0.477162187 | 0.54383791 | 0.722001044 |
| Copb2    | 22  | 1.533029093 | 1.647264395 | 0.114235302  | 0.54393403 | 0.722054071 |
| Cc2d1b   | 85  | 1.294797444 | 1.37869734  | 0.083899896  | 0.54402547 | 0.722054071 |
| Slc37a3  | 31  | 1.804761123 | 1.460889248 | -0.343871876 | 0.54401967 | 0.722054071 |
| Kpna3    | 87  | 0.928634708 | 0.936188215 | 0.007553506  | 0.54407781 | 0.722058225 |
| Adck3    | 45  | 2.356558124 | 2.773662444 | 0.41710432   | 0.54449331 | 0.722544297 |
| Gm7444   | 1   | 92          | 89.32038835 | -2.67961165  | 0.54480774 | 0.722830806 |
| Atg13    | 7   | 1.47023733  | 0.668589354 | -0.801647977 | 0.54478952 | 0.722830806 |
| Gatb     | 8   | 2.385159596 | 2.068471661 | -0.316687936 | 0.54495993 | 0.722902004 |
| Fam162a  | 31  | 0.645265785 | 0.456563883 | -0.188701902 | 0.54493049 | 0.722902004 |
| Afap1    | 35  | 1.624768468 | 1.368040261 | -0.256728207 | 0.54520728 | 0.723164748 |
| Rassf7   | 49  | 1.436725312 | 1.47845315  | 0.041727838  | 0.54533147 | 0.723198728 |
| Dtymk    | 16  | 0.830299721 | 0.960462642 | 0.130162921  | 0.54530377 | 0.723198728 |
| Ptma     | 95  | 1.207245656 | 1.207172806 | -7.29E-05    | 0.54541852 | 0.723248812 |
| Rps26    | 20  | 1.395017601 | 1.297275839 | -0.097741761 | 0.54561079 | 0.723394379 |
| Dcdc2a   | 68  | 40.99356588 | 42.9820409  | 1.988475014  | 0.54567619 | 0.723394379 |
| Hmgn1    | 78  | 1.302356316 | 1.358715625 | 0.056359309  | 0.54563593 | 0.723394379 |
| Ndc80    | 39  | 0.751349993 | 0.807683345 | 0.056333352  | 0.54582944 | 0.723532179 |
| Ccs      | 10  | 1.144447184 | 0.531392763 | -0.613054421 | 0.54599459 | 0.723685714 |
| Mcmbp    | 105 | 1.077038345 | 0.96876709  | -0.108271255 | 0.54609275 | 0.723750452 |
| N4bp1    | 41  | 0.820047823 | 0.763831027 | -0.056216796 | 0.54647133 | 0.724186789 |
| Zfp316   | 54  | 1.625899326 | 1.638480854 | 0.012581528  | 0.54653526 | 0.724206099 |
| Gcn1l1   | 69  | 1.520473911 | 1.341658748 | -0.178815162 | 0.54669661 | 0.724223707 |
| Arrdc2   | 9   | 3.718503719 | 2.60941982  | -1.109083898 | 0.54660654 | 0.724223707 |
| Rab23    | 76  | 1.155834214 | 1.220697406 | 0.064863192  | 0.5466844  | 0.724223707 |

|            |     |             |             |              |            |             |
|------------|-----|-------------|-------------|--------------|------------|-------------|
| Erh        | 40  | 1.378499446 | 1.495798864 | 0.117299419  | 0.54680641 | 0.724303783 |
| Rnf168     | 53  | 1.005149854 | 1.036907406 | 0.031757552  | 0.54687026 | 0.724322978 |
| 700123L14F | 1   | 93.86503067 | 95.39473684 | 1.529706167  | 0.54696622 | 0.72438469  |
| Picalm     | 82  | 1.520147201 | 1.139788552 | -0.380358649 | 0.54704367 | 0.724390584 |
| Atp6v1a    | 29  | 0.894510188 | 1.029831237 | 0.135321049  | 0.54706941 | 0.724390584 |
| Zfp943     | 13  | 1.579206219 | 1.070526085 | -0.508680134 | 0.54721953 | 0.724470868 |
| Mcl1       | 101 | 0.953903499 | 0.899729658 | -0.054173841 | 0.54732752 | 0.724470868 |
| Map4k4     | 174 | 1.497812577 | 1.386088898 | -0.111723679 | 0.54723604 | 0.724470868 |
| Cacnb2     | 35  | 11.77932598 | 11.83171183 | 0.052385852  | 0.54728216 | 0.724470868 |
| Gm16386    | 4   | 1.026992902 | 1.608233873 | 0.581240971  | 0.54737723 | 0.724471322 |
| Eaf2       | 58  | 1.439551935 | 1.769407245 | 0.329855311  | 0.5475604  | 0.724648389 |
| Spata2l    | 3   | 0.925925926 | 0.808080808 | -0.117845118 | 0.54777779 | 0.724814388 |
| Ksr1       | 35  | 0.91732044  | 0.563377654 | -0.353942787 | 0.54778462 | 0.724814388 |
| Zfp282     | 56  | 1.33872689  | 1.065818277 | -0.272908613 | 0.5478982  | 0.724899306 |
| Ralbp1     | 78  | 1.483639883 | 1.661313265 | 0.177673382  | 0.54833864 | 0.725351226 |
| Wash1      | 22  | 2.857254641 | 2.76387946  | -0.093375181 | 0.54832075 | 0.725351226 |
| Hyou1      | 90  | 1.191071286 | 1.055645317 | -0.135425969 | 0.54845885 | 0.72540857  |
| Hmg20a     | 15  | 0.85311461  | 0.696134    | -0.15698061  | 0.54853029 | 0.72540857  |
| Me1        | 66  | 1.535009277 | 1.74466958  | 0.209660303  | 0.54851353 | 0.72540857  |
| Rpl18      | 40  | 1.036448451 | 1.247878427 | 0.211429977  | 0.54865466 | 0.725507659 |
| 30072M11f  | 38  | 2.724111576 | 2.37101469  | -0.353096885 | 0.54876618 | 0.725589744 |
| Ehmt1      | 83  | 1.201043053 | 1.101710051 | -0.099333001 | 0.54888732 | 0.725684524 |
| Mageb3     | 33  | 1.888211684 | 1.722964824 | -0.16524686  | 0.54900253 | 0.725771453 |
| Elac1      | 84  | 1.270726253 | 1.070305222 | -0.200421031 | 0.54911519 | 0.725855    |
| Prss36     | 2   | 79.33921424 | 77.5363536  | -1.802860643 | 0.54922158 | 0.725930232 |
| Plp2       | 6   | 16.01863848 | 16.95496638 | 0.936327904  | 0.54929645 | 0.725963802 |
| Jak3       | 5   | 1.582816011 | 1.116351329 | -0.466464682 | 0.54939277 | 0.726025708 |
| Cdpf1      | 21  | 1.733445427 | 1.601525189 | -0.131920238 | 0.54968776 | 0.72615567  |
| Nhp2       | 24  | 1.593788165 | 1.519084323 | -0.074703842 | 0.54973854 | 0.72615567  |
| Tbc1d10c   | 18  | 4.216669221 | 4.589549027 | 0.372879805  | 0.54956487 | 0.72615567  |
| Gtf2b      | 42  | 0.929956862 | 0.822675271 | -0.107281591 | 0.5496897  | 0.72615567  |
| Snora16a   | 5   | 0.720779221 | 0.997245179 | 0.276465958  | 0.54961612 | 0.72615567  |
| Cox11      | 37  | 1.262050304 | 1.090519483 | -0.171530821 | 0.54991329 | 0.726306878 |
| Tbc1d5     | 58  | 1.209510995 | 1.184754977 | -0.024756018 | 0.54997895 | 0.726306878 |

|           |     |             |             |              |            |             |
|-----------|-----|-------------|-------------|--------------|------------|-------------|
| Klf11     | 86  | 1.228254721 | 1.345268258 | 0.117013537  | 0.5500015  | 0.726306878 |
| Efna4     | 26  | 1.354717236 | 1.506842146 | 0.15212491   | 0.55026285 | 0.726554043 |
| Hmbs      | 20  | 1.278412495 | 1.038677989 | -0.239734506 | 0.55028769 | 0.726554043 |
| Tipin     | 33  | 0.763416773 | 1.013455716 | 0.250038943  | 0.55056415 | 0.726853646 |
| Zfp369    | 18  | 0.8040249   | 1.034817024 | 0.230792123  | 0.55082854 | 0.727044775 |
| Galnt4    | 58  | 2.036495271 | 1.95971565  | -0.076779621 | 0.55084013 | 0.727044775 |
| Ddx41     | 40  | 1.516602754 | 1.30852526  | -0.208077493 | 0.55087719 | 0.727044775 |
| Rhou      | 96  | 1.578652443 | 1.535135666 | -0.043516777 | 0.5509071  | 0.727044775 |
| Hhex      | 87  | 1.581877809 | 1.462527081 | -0.119350728 | 0.55102098 | 0.727129666 |
| Mipol1    | 32  | 1.13897455  | 1.069130208 | -0.069844343 | 0.55110802 | 0.727144918 |
| Gm10532   | 2   | 78.75362319 | 81.03881279 | 2.285189597  | 0.55113165 | 0.727144918 |
| Nifk      | 15  | 0.49758238  | 0.555180272 | 0.057597892  | 0.55151874 | 0.727590217 |
| Dhfr      | 73  | 1.399817275 | 1.265035037 | -0.134782238 | 0.55173322 | 0.727807737 |
| Slc23a2   | 80  | 1.216578498 | 1.187269656 | -0.029308842 | 0.55232243 | 0.728454011 |
| 30133014F | 12  | 1.037269047 | 0.730020513 | -0.307248534 | 0.55229435 | 0.728454011 |
| Arrb1     | 48  | 1.040510301 | 0.925179128 | -0.115331172 | 0.55243181 | 0.728512175 |
| Mad211bp  | 14  | 1.788641123 | 1.749013248 | -0.039627875 | 0.55246582 | 0.728512175 |
| Phtf2     | 112 | 1.130766371 | 0.973759639 | -0.157006732 | 0.55256114 | 0.728572392 |
| Lrrc1     | 36  | 1.530707314 | 1.759735979 | 0.229028665  | 0.55270285 | 0.728624132 |
| Mrps22    | 9   | 2.175256458 | 1.701339666 | -0.473916792 | 0.55274725 | 0.728624132 |
| Dennd5a   | 69  | 1.270909276 | 1.054240538 | -0.216668739 | 0.55274934 | 0.728624132 |
| Szrd1     | 7   | 2.303072593 | 1.479654149 | -0.823418443 | 0.55282212 | 0.72863713  |
| Irx4      | 95  | 35.54578904 | 36.62557813 | 1.079789098  | 0.55285851 | 0.72863713  |
| Cacna1b   | 45  | 37.15110266 | 37.78559026 | 0.634487607  | 0.55295803 | 0.728702846 |
| Fam120a   | 115 | 1.298212048 | 1.173748706 | -0.124463343 | 0.5533659  | 0.729174858 |
| Ccdc94    | 16  | 0.754157138 | 0.812295106 | 0.058137968  | 0.55374687 | 0.729611343 |
| Pcnt      | 47  | 1.250463426 | 1.187487201 | -0.062976225 | 0.55386518 | 0.729636205 |
| Prc1      | 24  | 1.142507748 | 0.855638609 | -0.286869139 | 0.55383676 | 0.729636205 |
| Abcb6     | 9   | 0.182149362 | 0.633244589 | 0.451095226  | 0.55398068 | 0.729638942 |
| Eri1      | 70  | 0.905935973 | 0.822834545 | -0.083101428 | 0.55407202 | 0.729638942 |
| Atp5k     | 23  | 3.356209024 | 3.656901221 | 0.300692197  | 0.55409191 | 0.729638942 |
| Spty2d1   | 17  | 1.419193353 | 1.270093096 | -0.149100257 | 0.55393288 | 0.729638942 |
| Mrps24    | 73  | 1.159125291 | 1.133195619 | -0.025929672 | 0.55411588 | 0.729638942 |
| Exo5      | 15  | 1.607274522 | 1.603166574 | -0.004107948 | 0.55430165 | 0.729818069 |



|            |     |             |             |              |            |             |
|------------|-----|-------------|-------------|--------------|------------|-------------|
| Spin2c     | 4   | 22.91700896 | 21.71338966 | -1.203619305 | 0.55463558 | 0.73019222  |
| Mapkbp1    | 12  | 1.3675073   | 1.252181329 | -0.115325971 | 0.55485128 | 0.730267805 |
| Gm14023    | 8   | 2.172030388 | 2.044300657 | -0.127729731 | 0.55489206 | 0.730267805 |
| Mxra7      | 54  | 17.30518724 | 17.6783113  | 0.373124061  | 0.55485033 | 0.730267805 |
| Klhl26     | 46  | 1.460615865 | 1.518029464 | 0.057413598  | 0.55474957 | 0.730267805 |
| Atad1      | 41  | 1.555290794 | 1.58908425  | 0.033793455  | 0.55526373 | 0.730691414 |
| Methig1    | 3   | 47.4796748  | 48.66180049 | 1.18212569   | 0.55552388 | 0.730837141 |
| Ube2cbp    | 54  | 1.181347958 | 1.287010789 | 0.105662831  | 0.55551756 | 0.730837141 |
| Mettl7a2   | 3   | 47.4796748  | 48.66180049 | 1.18212569   | 0.55552388 | 0.730837141 |
| Snx2       | 56  | 1.782117545 | 1.474799932 | -0.307317612 | 0.55568462 | 0.730976257 |
| Cd82       | 14  | 4.058638453 | 4.036098124 | -0.022540329 | 0.55572926 | 0.730976257 |
| Smim13     | 16  | 1.96336021  | 1.91142367  | -0.05193654  | 0.55656268 | 0.731875683 |
| Zfp39      | 27  | 1.727995747 | 1.68020744  | -0.047788307 | 0.55650918 | 0.731875683 |
| Cpsf3      | 7   | 1.528386834 | 1.430458005 | -0.097928829 | 0.55655556 | 0.731875683 |
| Rab7       | 72  | 9.707455073 | 9.270273949 | -0.437181124 | 0.55684677 | 0.732062834 |
| Prr5       | 113 | 2.21920635  | 2.0625719   | -0.15663445  | 0.55677215 | 0.732062834 |
| Zfp9       | 14  | 1.178234147 | 0.785264841 | -0.392969306 | 0.55685466 | 0.732062834 |
| Ncapg2     | 37  | 1.792570158 | 1.593815247 | -0.198754912 | 0.55702968 | 0.732227316 |
| Trim13     | 5   | 94.28301573 | 92.94771922 | -1.33529651  | 0.55715349 | 0.732324462 |
| Arl8a      | 88  | 1.110292313 | 1.036835528 | -0.073456785 | 0.5573423  | 0.732507022 |
| 700028I16R | 31  | 1.55658895  | 1.47593667  | -0.08065228  | 0.55740256 | 0.732520615 |
| Nudt18     | 53  | 1.41537198  | 1.489242281 | 0.073870302  | 0.55755901 | 0.732594994 |
| Cbx2       | 80  | 1.187380051 | 1.137626359 | -0.049753692 | 0.55755506 | 0.732594994 |
| Adrm1      | 97  | 1.233490953 | 1.020868567 | -0.212622387 | 0.55783266 | 0.73270547  |
| Fgf23      | 3   | 28.65208041 | 29.17575758 | 0.523677164  | 0.55776627 | 0.73270547  |
| Gli2       | 51  | 22.954823   | 23.24113361 | 0.286310604  | 0.5578205  | 0.73270547  |
| Pdk1       | 33  | 0.971430114 | 0.887034428 | -0.084395686 | 0.55784282 | 0.73270547  |
| Ift52      | 26  | 1.525110465 | 2.161863048 | 0.636752582  | 0.55809657 | 0.732973159 |
| Lrrk1      | 33  | 1.581408489 | 1.352414114 | -0.228994375 | 0.55818149 | 0.733019074 |
| Wrap53     | 3   | 0.980392157 | 0.396825397 | -0.58356676  | 0.55824453 | 0.733036263 |
| Park2      | 17  | 0.618648855 | 0.736432334 | 0.117783479  | 0.55842399 | 0.7332063   |
| Gng11      | 15  | 12.82793359 | 14.78324065 | 1.955307062  | 0.55862537 | 0.733405087 |
| Gcnt1      | 21  | 14.71129899 | 14.87821378 | 0.166914787  | 0.5588146  | 0.733587887 |
| E2f8       | 113 | 1.296909243 | 1.239196211 | -0.057713032 | 0.55900211 | 0.733702774 |

|            |     |             |             |              |            |             |
|------------|-----|-------------|-------------|--------------|------------|-------------|
| Hmga2      | 30  | 1.933384181 | 2.095580532 | 0.16219635   | 0.55900159 | 0.733702774 |
| Srp68      | 29  | 1.55431694  | 1.7659339   | 0.211616959  | 0.55926955 | 0.733968448 |
| Phf7       | 25  | 0.992049059 | 0.550959014 | -0.441090046 | 0.55930456 | 0.733968448 |
| Gnb1l      | 74  | 1.14843538  | 1.137879427 | -0.010555952 | 0.55935744 | 0.733972195 |
| 130445N18F | 16  | 1.986141388 | 2.354864592 | 0.368723204  | 0.55947122 | 0.734055861 |
| Pot1a      | 6   | 2.069207993 | 2.330986752 | 0.261778759  | 0.55965309 | 0.734097557 |
| Rbbp8      | 48  | 1.018527724 | 0.90537185  | -0.113155874 | 0.55961066 | 0.734097557 |
| Ccdc57     | 11  | 1.78857923  | 1.261198481 | -0.527380749 | 0.55957198 | 0.734097557 |
| Cactin     | 80  | 0.861747975 | 1.003416654 | 0.141668679  | 0.55972431 | 0.734125361 |
| Lnx2       | 11  | 1.443780938 | 1.175635958 | -0.26814498  | 0.5598147  | 0.73417829  |
| Magi1      | 69  | 1.146868828 | 1.233645761 | 0.086776933  | 0.55987962 | 0.734197819 |
| Impad1     | 30  | 1.211853573 | 1.213436375 | 0.001582801  | 0.56042166 | 0.734646006 |
| Elp6       | 25  | 1.352202311 | 1.88880167  | 0.536599359  | 0.56041733 | 0.734646006 |
| Mir7228    | 1   | 98.59943978 | 99.07692308 | 0.477483301  | 0.56036177 | 0.734646006 |
| Eif3h      | 35  | 1.305287932 | 1.477611163 | 0.172323231  | 0.56032549 | 0.734646006 |
| Mast3      | 43  | 1.442167746 | 1.472046298 | 0.029878553  | 0.56072049 | 0.734972089 |
| Zfp358     | 36  | 1.77971658  | 2.071844409 | 0.292127829  | 0.56108601 | 0.735385507 |
| 730017L22F | 15  | 1.52802501  | 1.054965054 | -0.473059956 | 0.56115905 | 0.735415554 |
| Ddx20      | 89  | 1.234512678 | 1.223498765 | -0.011013914 | 0.56137104 | 0.735627665 |
| Nrf1       | 73  | 1.255098311 | 1.140397936 | -0.114700375 | 0.56142657 | 0.735634743 |
| 30023H24F  | 64  | 1.551718497 | 1.42033818  | -0.131380317 | 0.56158445 | 0.73577591  |
| Dazap1     | 86  | 0.962728577 | 1.040694454 | 0.077965877  | 0.56173808 | 0.735873405 |
| Irx6       | 21  | 41.46773451 | 40.18973841 | -1.277996104 | 0.56175916 | 0.735873405 |
| Brd2       | 51  | 1.615662638 | 1.555034411 | -0.060628227 | 0.56188042 | 0.735900858 |
| Ccdc157    | 11  | 1.085192945 | 1.275771805 | 0.19057886   | 0.56184253 | 0.735900858 |
| Asap1      | 150 | 1.082204405 | 1.133877381 | 0.051672976  | 0.56205796 | 0.735912353 |
| Smarcd1    | 58  | 3.843145644 | 3.980274531 | 0.137128887  | 0.56196019 | 0.735912353 |
| Mettl8     | 7   | 0.64516129  | 0.636765449 | -0.008395841 | 0.56208979 | 0.735912353 |
| Sdccag8    | 44  | 1.804022631 | 1.275148926 | -0.528873705 | 0.56199913 | 0.735912353 |
| Eif2s2     | 24  | 1.568895375 | 1.463363921 | -0.105531454 | 0.56233969 | 0.735928069 |
| Calr3      | 8   | 1.085467049 | 1.311815942 | 0.226348893  | 0.56238683 | 0.735928069 |
| Il6        | 2   | 5.039929427 | 5.427823454 | 0.387894027  | 0.56241547 | 0.735928069 |
| Mcm3ap     | 16  | 0.986010517 | 0.768549765 | -0.217460753 | 0.56222401 | 0.735928069 |
| Pigk       | 21  | 1.063908486 | 1.109045077 | 0.045136591  | 0.56238966 | 0.735928069 |

|           |     |             |             |              |            |             |
|-----------|-----|-------------|-------------|--------------|------------|-------------|
| Pgd       | 34  | 1.229364813 | 1.553100624 | 0.323735811  | 0.5622588  | 0.735928069 |
| Scrib     | 120 | 1.353085652 | 1.089382454 | -0.263703198 | 0.56245286 | 0.735928069 |
| Mir1904   | 68  | 1.284513663 | 1.007862756 | -0.276650907 | 0.56253385 | 0.735968411 |
| Dcp1b     | 8   | 2.47635743  | 1.639864965 | -0.836492465 | 0.56265262 | 0.735996611 |
| Tpm3      | 33  | 0.998003574 | 0.974774988 | -0.023228585 | 0.56265572 | 0.735996611 |
| Mcat      | 46  | 1.425463845 | 1.356138866 | -0.069324978 | 0.56285174 | 0.736142975 |
| Mir425    | 2   | 74.9092559  | 77.8092006  | 2.899944705  | 0.56286794 | 0.736142975 |
| Pnoc      | 4   | 97.09659628 | 96.00362339 | -1.092972893 | 0.56312203 | 0.736409654 |
| Rab11b    | 36  | 1.408848525 | 1.28122238  | -0.127626145 | 0.56325592 | 0.736411653 |
| Ifih1     | 20  | 2.160031361 | 1.90712199  | -0.252909371 | 0.56327412 | 0.736411653 |
| Rpusd3    | 15  | 2.220177937 | 2.113148782 | -0.107029155 | 0.5632379  | 0.736411653 |
| Srxn1     | 56  | 1.436145997 | 1.378472998 | -0.057672998 | 0.56334664 | 0.736440854 |
| Oser1     | 98  | 1.061330983 | 1.045983497 | -0.015347487 | 0.56356688 | 0.736515137 |
| Dpm1      | 61  | 1.176489838 | 1.393504518 | 0.21701468   | 0.56395329 | 0.736515137 |
| Fchsd1    | 38  | 2.729451064 | 2.680582824 | -0.04886824  | 0.56385184 | 0.736515137 |
| Tmem217   | 20  | 2.192372878 | 2.572005468 | 0.379632589  | 0.56384968 | 0.736515137 |
| Srrm2     | 62  | 1.159431555 | 1.076640574 | -0.082790981 | 0.56362217 | 0.736515137 |
| Tldc1     | 1   | 98.61111111 | 97.26027397 | -1.350837139 | 0.56395557 | 0.736515137 |
| Pum2      | 114 | 1.303251597 | 1.253667753 | -0.049583843 | 0.56357926 | 0.736515137 |
| Cox6b1    | 14  | 1.418339873 | 1.896573467 | 0.478233594  | 0.56375033 | 0.736515137 |
| Zfp395    | 114 | 1.25181522  | 1.24737053  | -0.00444469  | 0.56390631 | 0.736515137 |
| Dpm1-adnp | 61  | 1.176489838 | 1.393504518 | 0.21701468   | 0.56395329 | 0.736515137 |
| Letm1     | 66  | 1.156078458 | 0.919445835 | -0.236632623 | 0.56371082 | 0.736515137 |
| Mrps2     | 58  | 1.282705928 | 1.334863369 | 0.052157441  | 0.56420783 | 0.736779    |
| Fbln2     | 25  | 2.202812752 | 1.945387252 | -0.2574255   | 0.56435318 | 0.736780958 |
| Ranbp10   | 17  | 0.982203969 | 1.107449433 | 0.125245463  | 0.56435995 | 0.736780958 |
| Dpm2      | 21  | 2.29510365  | 1.865345307 | -0.429758343 | 0.56430583 | 0.736780958 |
| Setd6     | 25  | 1.433703349 | 1.176312232 | -0.257391117 | 0.56451246 | 0.736783407 |
| Spice1    | 41  | 1.418266294 | 1.188784968 | -0.229481326 | 0.56445297 | 0.736783407 |
| Nab1      | 115 | 1.404000313 | 1.343381132 | -0.060619181 | 0.56447488 | 0.736783407 |
| Prn       | 5   | 1.926780301 | 2.326508101 | 0.399727799  | 0.56480528 | 0.736907043 |
| 8-Sep     | 44  | 1.223396496 | 1.09809883  | -0.125297666 | 0.5646925  | 0.736907043 |
| Seh1l     | 111 | 1.101070271 | 1.09451692  | -0.006553351 | 0.56480806 | 0.736907043 |
| Prnp      | 5   | 1.926780301 | 2.326508101 | 0.399727799  | 0.56480528 | 0.736907043 |

|            |     |             |             |              |            |             |
|------------|-----|-------------|-------------|--------------|------------|-------------|
| Rmdn2      | 27  | 1.445069387 | 1.517086349 | 0.072016963  | 0.56497346 | 0.737057305 |
| Mir7238    | 12  | 1.320260082 | 1.24474817  | -0.075511912 | 0.56520323 | 0.737094936 |
| Dtwd2      | 64  | 3.222839335 | 2.96060912  | -0.262230214 | 0.56519473 | 0.737094936 |
| 130480K23F | 28  | 1.276090062 | 1.356418623 | 0.080328561  | 0.56520065 | 0.737094936 |
| Ttc39a     | 30  | 8.108291917 | 7.978330334 | -0.129961582 | 0.56518565 | 0.737094936 |
| Lrrc49     | 12  | 1.411358687 | 1.130080926 | -0.281277761 | 0.56539301 | 0.737211395 |
| Cdc5l      | 58  | 1.246737572 | 1.25777852  | 0.011040947  | 0.56535076 | 0.737211395 |
| Pick1      | 34  | 1.528524261 | 1.337449176 | -0.191075085 | 0.56563932 | 0.737430807 |
| Psmg1      | 34  | 1.045657749 | 0.946948518 | -0.098709232 | 0.56566179 | 0.737430807 |
| Alg9       | 47  | 1.129168055 | 1.188440281 | 0.059272226  | 0.56575501 | 0.73748681  |
| Gpd1l      | 49  | 1.282074203 | 1.273350844 | -0.008723359 | 0.56581331 | 0.737497293 |
| Csnk1g2    | 30  | 1.247448704 | 1.171652494 | -0.075796209 | 0.56591345 | 0.737562309 |
| Icosl      | 55  | 1.781081372 | 2.110581744 | 0.329500372  | 0.56600329 | 0.737592686 |
| 110009O20F | 3   | 2.140672783 | 1.380670611 | -0.760002171 | 0.56603729 | 0.737592686 |
| Fam206a    | 3   | 2.112676056 | 2.066207801 | -0.046468256 | 0.56615624 | 0.737676214 |
| Rap2a      | 114 | 1.018756209 | 0.881446066 | -0.137310143 | 0.56622855 | 0.737676214 |
| Csrp1      | 21  | 1.274499059 | 1.06116219  | -0.213336869 | 0.56626188 | 0.737676214 |
| 110039H08F | 22  | 1.73033753  | 1.638881463 | -0.091456067 | 0.56630248 | 0.737676214 |
| Itpk1      | 93  | 1.070355951 | 1.041810589 | -0.028545362 | 0.56658704 | 0.737981384 |
| Tmem214    | 37  | 1.892936798 | 1.299083503 | -0.593853295 | 0.56721251 | 0.738730485 |
| Pisd-ps2   | 4   | 0.488087708 | 0.966708023 | 0.478620315  | 0.56740652 | 0.738917578 |
| Vta1       | 21  | 1.053774054 | 0.977954026 | -0.075820028 | 0.56756168 | 0.739054047 |
| Dpcd       | 5   | 0.465179175 | 1.046326484 | 0.581147309  | 0.56763448 | 0.739083267 |
| Ybey       | 8   | 0.595238095 | 0.771604938 | 0.176366843  | 0.56770092 | 0.739104186 |
| Lcp1       | 10  | 1.550989176 | 1.679795972 | 0.128806796  | 0.56834282 | 0.739808616 |
| Fip1l1     | 40  | 1.290270017 | 1.46910851  | 0.178838493  | 0.56832626 | 0.739808616 |
| Tnfrsf1a   | 23  | 2.08127217  | 1.967254069 | -0.114018101 | 0.56851033 | 0.739961021 |
| Ptgr1      | 2   | 3.887778888 | 8.333333333 | 4.445554446  | 0.56911545 | 0.740682943 |
| Cpne2      | 79  | 1.234656348 | 1.244025211 | 0.009368863  | 0.5692205  | 0.740753954 |
| Memo1      | 137 | 1.208025406 | 1.119264831 | -0.088760575 | 0.56930171 | 0.740793948 |
| Trpc3      | 86  | 12.95128739 | 13.81115533 | 0.859867939  | 0.56952836 | 0.741023154 |
| Itch       | 54  | 1.328775265 | 1.240035757 | -0.088739508 | 0.56998012 | 0.741545201 |
| Ift46      | 11  | 1.437465764 | 1.412740984 | -0.02472478  | 0.57030841 | 0.741872261 |
| Depdc1b    | 68  | 1.257683662 | 1.179290797 | -0.078392865 | 0.57033263 | 0.741872261 |

|            |     |             |             |              |            |             |
|------------|-----|-------------|-------------|--------------|------------|-------------|
| Pmepa1     | 98  | 1.299715353 | 1.299441778 | -0.000273574 | 0.5705956  | 0.742148541 |
| Larp7      | 6   | 1.170906719 | 0.79213816  | -0.378768559 | 0.57100175 | 0.742365783 |
| Nr4a2      | 263 | 1.309023241 | 1.194594231 | -0.11442901  | 0.5708231  | 0.742365783 |
| 310013L24F | 93  | 1.155907857 | 1.18106926  | 0.025161402  | 0.57093231 | 0.742365783 |
| Zdhhc15    | 5   | 18.67109635 | 20.88979592 | 2.218699573  | 0.57090299 | 0.742365783 |
| Gm11974    | 5   | 2.75635767  | 2.669515934 | -0.086841736 | 0.57101558 | 0.742365783 |
| Snx7       | 18  | 1.015894604 | 0.881897616 | -0.133996989 | 0.57125425 | 0.742610288 |
| Kifc3      | 33  | 6.706021749 | 5.526050684 | -1.179971066 | 0.57137172 | 0.742697187 |
| Endov      | 33  | 1.109343677 | 1.133296658 | 0.023952981  | 0.57166896 | 0.743017748 |
| Gm9962     | 22  | 55.97363541 | 55.84881346 | -0.12482195  | 0.57187759 | 0.74315726  |
| Ing5       | 38  | 0.932013442 | 1.076144849 | 0.144131408  | 0.57187434 | 0.74315726  |
| Lym5       | 19  | 1.064403318 | 1.131444611 | 0.067041293  | 0.57222908 | 0.743548177 |
| Vasp       | 60  | 1.815719372 | 1.83411238  | 0.018393009  | 0.57245388 | 0.743774415 |
| Tmem41b    | 31  | 1.100268136 | 1.201223002 | 0.100954866  | 0.57302872 | 0.744455368 |
| Nt5c3b     | 11  | 1.671333313 | 1.225047656 | -0.446285657 | 0.57337132 | 0.744702664 |
| Abhd17a    | 32  | 1.837147262 | 1.892623658 | 0.055476396  | 0.57332132 | 0.744702664 |
| Rbm18      | 6   | 1.126063264 | 0.783338906 | -0.342724358 | 0.57334818 | 0.744702664 |
| Rab14      | 95  | 1.203303452 | 1.517852386 | 0.314548934  | 0.57351213 | 0.744753712 |
| 30028O05F  | 19  | 4.86600352  | 4.891445248 | 0.025441729  | 0.57349354 | 0.744753712 |
| Atp6v1b2   | 16  | 1.174885056 | 0.469104818 | -0.705780238 | 0.57383085 | 0.745101669 |
| Gm7334     | 45  | 0.823504662 | 0.676862887 | -0.146641774 | 0.57399395 | 0.745181564 |
| Slc18a3    | 50  | 15.89942245 | 16.25646312 | 0.357040667  | 0.57395306 | 0.745181564 |
| Prpf39     | 37  | 0.887325291 | 0.744731603 | -0.142593687 | 0.57413795 | 0.745302568 |
| 30217O12F  | 14  | 2.681168726 | 2.382759415 | -0.298409311 | 0.57419309 | 0.745308215 |
| Nebl       | 26  | 1.600273158 | 1.877974578 | 0.277701421  | 0.57427259 | 0.745345482 |
| Gm9958     | 46  | 0.85516884  | 0.966724631 | 0.111555791  | 0.5743292  | 0.745353025 |
| Mfap1b     | 2   | 6.701030928 | 4.901960784 | -1.799070144 | 0.5744636  | 0.745461524 |
| Gm19345    | 13  | 30.52034679 | 31.04688173 | 0.526534943  | 0.57484089 | 0.745885152 |
| Zfp189     | 12  | 1.574507514 | 1.68830484  | 0.113797326  | 0.5752614  | 0.746364787 |
| Gga3       | 63  | 1.174343632 | 1.174178665 | -0.000164967 | 0.57583095 | 0.747037698 |
| 30043F03F  | 8   | 0.811382114 | 0.392675208 | -0.418706905 | 0.57613237 | 0.747141547 |
| Dnase2a    | 35  | 4.589500817 | 4.883634223 | 0.294133405  | 0.5762165  | 0.747141547 |
| Tmem33     | 52  | 1.312606327 | 1.307057548 | -0.005548779 | 0.5760233  | 0.747141547 |
| 10021A11F  | 15  | 1.099310425 | 1.025128642 | -0.074181783 | 0.57604423 | 0.747141547 |

|            |     |             |             |              |            |             |
|------------|-----|-------------|-------------|--------------|------------|-------------|
| Pdzd3      | 1   | 32.8358209  | 37.5        | 4.664179104  | 0.57611158 | 0.747141547 |
| Cdca8      | 11  | 1.542485324 | 0.907952509 | -0.634532815 | 0.57618238 | 0.747141547 |
| Ap1g2      | 17  | 17.00143319 | 16.4710845  | -0.530348684 | 0.57634068 | 0.747173144 |
| '00003D09F | 5   | 1.130386862 | 0.715486867 | -0.414899995 | 0.5763427  | 0.747173144 |
| Ccdc38     | 8   | 1.63751371  | 1.349977995 | -0.287535715 | 0.57643517 | 0.747227005 |
| Slc35g1    | 68  | 1.215100452 | 1.123678729 | -0.091421722 | 0.57672797 | 0.747540524 |
| H2-Ke6     | 49  | 1.385918804 | 1.271103973 | -0.114814831 | 0.57698695 | 0.747810152 |
| Inafm2     | 103 | 1.301910999 | 1.308488969 | 0.00657797   | 0.57713298 | 0.747933349 |
| Scand1     | 23  | 1.618540649 | 1.297880464 | -0.320660184 | 0.57724659 | 0.748014526 |
| Gm9855     | 20  | 1.267070218 | 0.848821188 | -0.41824903  | 0.57736649 | 0.748103827 |
| Nek8       | 24  | 1.273596753 | 1.550615554 | 0.277018801  | 0.57746994 | 0.748105752 |
| Pacs2      | 143 | 1.430220311 | 1.330600951 | -0.09961936  | 0.57742595 | 0.748105752 |
| Shpk       | 23  | 1.282276882 | 1.32512921  | 0.042852328  | 0.57783073 | 0.748507076 |
| Tfg        | 41  | 2.200166154 | 1.973411603 | -0.226754551 | 0.57800127 | 0.748661901 |
| D1Ertd622e | 70  | 1.121306269 | 1.052125373 | -0.069180896 | 0.57815535 | 0.74879537  |
| Ddhd2      | 88  | 0.967123125 | 1.122557975 | 0.15543485   | 0.57856339 | 0.749257715 |
| Tmem38b    | 32  | 2.041782228 | 1.862832015 | -0.178950212 | 0.57871166 | 0.749383596 |
| Idh1       | 23  | 1.538546991 | 1.807199336 | 0.268652345  | 0.57891576 | 0.749530962 |
| Zfp143     | 50  | 1.315235472 | 1.313664626 | -0.001570846 | 0.57892762 | 0.749530962 |
| Dnajb12    | 3   | 1.344053151 | 2.298850575 | 0.954797424  | 0.57900144 | 0.749560394 |
| Efcab7     | 18  | 0.492458684 | 0.792662312 | 0.300203628  | 0.57913259 | 0.749664045 |
| 310032O08F | 16  | 1.646788388 | 1.166197935 | -0.480590453 | 0.57957296 | 0.75016791  |
| Rcan1      | 72  | 1.831624296 | 1.359853519 | -0.471770777 | 0.57969236 | 0.750256275 |
| Atp13a3    | 121 | 1.28219972  | 1.288304561 | 0.006104841  | 0.57976601 | 0.750285422 |
| Ahdc1      | 16  | 1.02494716  | 1.062591087 | 0.037643926  | 0.579894   | 0.750384884 |
| Rgs7bp     | 20  | 27.24860411 | 27.5181516  | 0.269547486  | 0.57999913 | 0.750454748 |
| Mkl        | 17  | 1.95236961  | 1.67385511  | -0.278514501 | 0.58015383 | 0.750555078 |
| Brd7       | 82  | 0.902824096 | 0.806534456 | -0.09628964  | 0.58017897 | 0.750555078 |
| Rps16      | 5   | 0.750819881 | 1.364145658 | 0.613325778  | 0.58038189 | 0.750619062 |
| 310061I04R | 68  | 1.280210591 | 1.132191425 | -0.148019166 | 0.58034758 | 0.750619062 |
| AF357399   | 5   | 0.750819881 | 1.364145658 | 0.613325778  | 0.58038189 | 0.750619062 |
| Banp       | 97  | 1.1893853   | 1.116028826 | -0.073356474 | 0.58059064 | 0.7507567   |
| Map3k4     | 39  | 1.236942805 | 1.220196045 | -0.01674676  | 0.58054334 | 0.7507567   |
| H2afv      | 64  | 1.232384023 | 1.098824268 | -0.133559755 | 0.5810211  | 0.751247127 |

|             |     |             |             |              |            |             |
|-------------|-----|-------------|-------------|--------------|------------|-------------|
| Rilpl2      | 14  | 1.174741809 | 0.929089445 | -0.245652364 | 0.58116651 | 0.75136893  |
| 10-Sep      | 40  | 1.612254345 | 1.465263471 | -0.146990874 | 0.58151834 | 0.751707535 |
| Zfp536      | 49  | 46.11849299 | 46.333187   | 0.214694007  | 0.58153087 | 0.751707535 |
| Naa16       | 57  | 0.908787439 | 0.953251108 | 0.04446367   | 0.58179173 | 0.751978493 |
| O45n01rik-n | 1   | 4.377104377 | 3.542234332 | -0.834870045 | 0.58232784 | 0.752284487 |
| 10045N01F   | 1   | 4.377104377 | 3.542234332 | -0.834870045 | 0.58232784 | 0.752284487 |
| Rock1       | 81  | 1.204773823 | 1.369051936 | 0.164278114  | 0.58238734 | 0.752284487 |
| Mettl17     | 26  | 2.138314362 | 2.041584968 | -0.096729394 | 0.58221637 | 0.752284487 |
| Hoxa6       | 36  | 41.11652215 | 42.60637853 | 1.489856379  | 0.58211718 | 0.752284487 |
| Wdr37       | 13  | 1.422931762 | 1.625364189 | 0.202432427  | 0.58224734 | 0.752284487 |
| Tarbp2      | 23  | 1.330932344 | 1.347805802 | 0.016873458  | 0.58234634 | 0.752284487 |
| Zmat3       | 61  | 1.596432488 | 1.554027969 | -0.042404519 | 0.5824716  | 0.752288688 |
| Yipf1       | 12  | 1.511982629 | 1.322610814 | -0.189371815 | 0.58254439 | 0.752288688 |
| Atf4        | 12  | 3.170702461 | 2.711404155 | -0.459298306 | 0.58250243 | 0.752288688 |
| Tmem165     | 59  | 1.8290947   | 1.714561958 | -0.114532742 | 0.58263707 | 0.752342165 |
| Drosha      | 42  | 1.449066201 | 1.515967337 | 0.066901136  | 0.58302844 | 0.752767048 |
| Madd        | 71  | 1.173303989 | 1.179365979 | 0.00606199   | 0.58306871 | 0.752767048 |
| Bloc1s2     | 21  | 1.453983569 | 1.476890496 | 0.022906927  | 0.5835964  | 0.753382027 |
| Nhs         | 116 | 37.93043974 | 38.01811095 | 0.087671207  | 0.58385743 | 0.753652704 |
| Ddit4       | 67  | 1.275349335 | 1.277446395 | 0.00209706   | 0.5843149  | 0.754176873 |
| Prkar2a     | 88  | 0.998811173 | 0.840043491 | -0.158767682 | 0.58469827 | 0.754567944 |
| Lmtk2       | 57  | 1.267203771 | 1.520919743 | 0.253715972  | 0.58477216 | 0.754567944 |
| Mdp1        | 12  | 1.404123429 | 1.146205813 | -0.257917615 | 0.58473148 | 0.754567944 |
| Trp53inp2   | 48  | 1.612802109 | 1.401513605 | -0.211288505 | 0.58494221 | 0.754675263 |
| Slc46a3     | 28  | 1.049540416 | 1.339762758 | 0.290222342  | 0.58495819 | 0.754675263 |
| Slc35b4     | 17  | 1.180144299 | 1.414614018 | 0.234469718  | 0.58510881 | 0.75473687  |
| Nfxl1       | 38  | 1.172097345 | 1.014592487 | -0.157504858 | 0.58510215 | 0.75473687  |
| Fbxo45      | 71  | 1.072438232 | 0.981950671 | -0.09048756  | 0.5855321  | 0.755152175 |
| Tmem106b    | 48  | 1.503755736 | 1.58919871  | 0.085442974  | 0.5855337  | 0.755152175 |
| Ahcyl2      | 53  | 1.537803166 | 1.65290201  | 0.115098845  | 0.58558586 | 0.755153076 |
| Eme1        | 8   | 2.392380128 | 2.043421576 | -0.348958552 | 0.58577027 | 0.755258139 |
| 130426D05F  | 2   | 27.40406666 | 26.01265388 | -1.391412781 | 0.58576688 | 0.755258139 |
| Cdc14a      | 64  | 1.164912734 | 1.086376913 | -0.078535821 | 0.58601135 | 0.755502602 |
| 10053B23F   | 1   | 52.47524752 | 48.90510949 | -3.570138036 | 0.58607378 | 0.755516706 |

|          |    |             |             |              |            |             |
|----------|----|-------------|-------------|--------------|------------|-------------|
| Eif5a    | 60 | 1.837847788 | 1.668156974 | -0.169690813 | 0.58615903 | 0.755560229 |
| Mapk7    | 63 | 1.285704927 | 1.28955932  | 0.003854392  | 0.58656558 | 0.756007998 |
| Eif4a3   | 34 | 0.453252479 | 0.759155655 | 0.305903177  | 0.58660945 | 0.756007998 |
| Sdf2l1   | 15 | 2.594005946 | 2.098698605 | -0.495307342 | 0.58670964 | 0.756070713 |
| Arl1     | 46 | 1.466304151 | 1.461348302 | -0.004955849 | 0.58692333 | 0.756279681 |
| Etohi1   | 12 | 2.089912972 | 2.023200994 | -0.066711978 | 0.58701994 | 0.756286152 |
| Rpl41    | 14 | 1.024179871 | 1.145430972 | 0.121251101  | 0.58703143 | 0.756286152 |
| Sfrp4    | 10 | 13.76317648 | 15.36301959 | 1.599843112  | 0.58729547 | 0.756559895 |
| Rps2     | 6  | 1.934744948 | 1.685353348 | -0.2493916   | 0.5877531  | 0.757013788 |
| Snora64  | 6  | 1.934744948 | 1.685353348 | -0.2493916   | 0.5877531  | 0.757013788 |
| Dusp9    | 18 | 13.33002238 | 14.17010485 | 0.840082463  | 0.58780258 | 0.757013788 |
| Naf1     | 39 | 1.1660605   | 1.18880285  | 0.02274235   | 0.58802856 | 0.757238354 |
| Tor2a    | 45 | 2.276790204 | 1.943771326 | -0.333018878 | 0.58811573 | 0.757284156 |
| Col4a6   | 2  | 49.24379915 | 46.81236203 | -2.431437122 | 0.58837185 | 0.757547468 |
| Chmp1a   | 49 | 1.339537865 | 1.382684151 | 0.043146286  | 0.58876441 | 0.75778695  |
| Uqcrfs1  | 38 | 1.200900535 | 1.219115579 | 0.018215045  | 0.58868805 | 0.75778695  |
| Parp3    | 11 | 0.96725526  | 0.762786887 | -0.204468373 | 0.58874171 | 0.75778695  |
| Pitpnc1  | 23 | 0.974474638 | 1.318805459 | 0.344330821  | 0.58863585 | 0.75778695  |
| Acap3    | 67 | 0.957635258 | 0.947570245 | -0.010065013 | 0.58897905 | 0.757982731 |
| Asxl2    | 57 | 1.068126231 | 1.040390165 | -0.027736066 | 0.58901984 | 0.757982731 |
| Qtrt1    | 30 | 1.810646829 | 1.550384321 | -0.260262508 | 0.58917824 | 0.758120084 |
| Tcea2    | 31 | 1.121433397 | 1.165095274 | 0.043661877  | 0.58930944 | 0.758222417 |
| Slc12a3  | 2  | 89.22773445 | 90.52083333 | 1.293098887  | 0.58948235 | 0.758378399 |
| Bag1     | 64 | 1.151434333 | 1.240239607 | 0.088805273  | 0.58965048 | 0.758528198 |
| Ric8b    | 24 | 1.958218862 | 1.057846024 | -0.900372838 | 0.58991207 | 0.758798183 |
| Rpn2     | 74 | 1.387410158 | 1.223634206 | -0.163775952 | 0.59022917 | 0.759139525 |
| Bmf      | 39 | 1.709102113 | 1.796268177 | 0.087166064  | 0.5903928  | 0.759283431 |
| Knop1    | 68 | 1.338157165 | 1.192106451 | -0.146050714 | 0.59048756 | 0.759338743 |
| Foxm1    | 32 | 1.249110642 | 1.304679557 | 0.055568916  | 0.59054846 | 0.759350521 |
| Vkorc1l1 | 41 | 1.148816887 | 1.203862859 | 0.055045972  | 0.59072853 | 0.759515508 |
| Commd2   | 6  | 2.128274997 | 1.843965832 | -0.284309164 | 0.59080326 | 0.759545036 |
| Akip1    | 42 | 1.640409007 | 1.313258179 | -0.327150828 | 0.59112093 | 0.75986738  |
| Gtpbp3   | 16 | 1.614386907 | 1.829363342 | 0.214976436  | 0.59115756 | 0.75986738  |
| Cxcl10   | 3  | 0.555555556 | 0.99009901  | 0.434543454  | 0.59131706 | 0.76000583  |



|            |     |             |             |              |            |             |
|------------|-----|-------------|-------------|--------------|------------|-------------|
| Tnfrsf22   | 18  | 2.340006856 | 2.334296915 | -0.005709941 | 0.59139921 | 0.760044836 |
| Hnrnpul1   | 47  | 1.13300704  | 0.944617127 | -0.188389913 | 0.5917614  | 0.760443714 |
| Sp3        | 205 | 1.151102816 | 1.102413732 | -0.048689084 | 0.59184669 | 0.760486717 |
| Armc10     | 25  | 1.684980954 | 1.409108481 | -0.275872473 | 0.59198465 | 0.760597391 |
| Tbcel      | 25  | 1.39436029  | 1.289551823 | -0.104808466 | 0.59220699 | 0.760749836 |
| Gmnn       | 48  | 1.092793326 | 1.16436891  | 0.071575584  | 0.59220289 | 0.760749836 |
| Bak1       | 13  | 2.550292377 | 2.556283311 | 0.005990934  | 0.59233848 | 0.760852142 |
| Prkag1     | 21  | 1.615770447 | 1.497837755 | -0.117932692 | 0.59307461 | 0.761731008 |
| Slc38a6    | 17  | 1.220370804 | 1.3239981   | 0.103627296  | 0.59328899 | 0.761939672 |
| Sar1b      | 16  | 1.977397131 | 2.520825134 | 0.543428004  | 0.59351583 | 0.762164284 |
| U2af1      | 81  | 1.093217535 | 0.997445145 | -0.095772389 | 0.59368324 | 0.762312548 |
| Pcyox1l    | 43  | 5.369323878 | 5.780060251 | 0.410736372  | 0.59396148 | 0.762603094 |
| Emc8       | 65  | 0.890866342 | 1.018903516 | 0.128037174  | 0.59405628 | 0.762611958 |
| Cox4i1     | 48  | 1.004312444 | 0.91221083  | -0.092101614 | 0.59407232 | 0.762611958 |
| Sdhaf3     | 22  | 1.142677382 | 0.930663088 | -0.212014294 | 0.59418566 | 0.762690726 |
| !30354K17F | 27  | 1.649235582 | 1.485443531 | -0.16379205  | 0.59435277 | 0.762838497 |
| Fkbp2      | 35  | 1.405373266 | 1.421538586 | 0.01616532   | 0.59464753 | 0.763016596 |
| Pdzd11     | 5   | 17.66046938 | 16.3990128  | -1.261456581 | 0.59457834 | 0.763016596 |
| Tm7sf3     | 39  | 1.685580418 | 1.547062036 | -0.138518382 | 0.59462079 | 0.763016596 |
| Vrk3       | 5   | 3.578336557 | 3.352586318 | -0.22575024  | 0.59470019 | 0.76301745  |
| Parp16     | 34  | 1.743283511 | 1.594061513 | -0.149221998 | 0.59484453 | 0.763135921 |
| Chrac1     | 32  | 0.627606769 | 0.641413948 | 0.013807179  | 0.59495726 | 0.763213815 |
| Rps10      | 76  | 1.366723311 | 1.232333813 | -0.134389498 | 0.59518459 | 0.76343869  |
| Al846148   | 31  | 2.055476127 | 1.978284219 | -0.077191907 | 0.59538206 | 0.763599144 |
| Lin7b      | 27  | 7.610695029 | 10.36170705 | 2.751012025  | 0.59556009 | 0.763599144 |
| !33406C10F | 6   | 1.56838335  | 1.02395817  | -0.54442518  | 0.59545098 | 0.763599144 |
| Tprkb      | 15  | 1.311459101 | 1.242805589 | -0.068653512 | 0.59549328 | 0.763599144 |
| Eml4       | 81  | 1.240644213 | 1.317165986 | 0.076521773  | 0.59556987 | 0.763599144 |
| Gtpbp1     | 49  | 1.088009898 | 1.127637936 | 0.039628038  | 0.59569966 | 0.763698827 |
| Metrn      | 18  | 1.018835616 | 1.270903709 | 0.252068093  | 0.59577408 | 0.76372751  |
| Primpol    | 14  | 2.423627767 | 1.725476094 | -0.698151673 | 0.59596944 | 0.763911213 |
| Commdd8    | 15  | 0.904286618 | 1.705306733 | 0.801020115  | 0.59622684 | 0.764174393 |
| Cherp      | 66  | 0.8450072   | 1.066566143 | 0.221558942  | 0.59634296 | 0.764256467 |
| Mir5100    | 18  | 0.586122222 | 0.841754063 | 0.255631841  | 0.59644237 | 0.764317117 |

|            |     |             |             |              |            |             |
|------------|-----|-------------|-------------|--------------|------------|-------------|
| Suds3      | 127 | 1.26755353  | 1.234311186 | -0.033242344 | 0.59662531 | 0.76448205  |
| Pms1       | 4   | 0           | 0.161290323 | 0.161290323  | 0.59667527 | 0.76448205  |
| Zbtb17     | 73  | 1.313089627 | 1.15836036  | -0.154729267 | 0.59700186 | 0.764714387 |
| Gm7008     | 14  | 1.137724883 | 1.237734325 | 0.100009442  | 0.59695581 | 0.764714387 |
| Tmem14c    | 39  | 1.301843506 | 1.359831176 | 0.05798767   | 0.59701295 | 0.764714387 |
| Sec11c     | 13  | 1.042922519 | 1.340598472 | 0.297675953  | 0.59718192 | 0.764864061 |
| Tnfaip3    | 42  | 1.305501247 | 1.094140288 | -0.211360959 | 0.59730473 | 0.764954584 |
| Frrs1      | 14  | 1.884726509 | 1.767216516 | -0.117509994 | 0.59772864 | 0.765430677 |
| Wdr92      | 3   | 0.806451613 | 0.303030303 | -0.50342131  | 0.59784826 | 0.765517049 |
| Atpif1     | 8   | 1.763410662 | 1.458246315 | -0.305164347 | 0.59790243 | 0.765519611 |
| Zfp12      | 13  | 0.518436336 | 1.021511478 | 0.503075142  | 0.59797876 | 0.765550541 |
| Coil       | 36  | 1.574765553 | 1.646818388 | 0.072052835  | 0.59810243 | 0.765584298 |
| Wapal      | 101 | 1.363982061 | 1.301068292 | -0.062913769 | 0.59810947 | 0.765584298 |
| Smndc1     | 98  | 1.522186029 | 1.505387697 | -0.016798332 | 0.59827144 | 0.76565804  |
| 11-Mar     | 114 | 58.20255154 | 58.18295933 | -0.019592204 | 0.59825296 | 0.76565804  |
| Ctxn1      | 44  | 4.047197303 | 3.905733088 | -0.141464215 | 0.59836429 | 0.765710089 |
| Plekhn2    | 90  | 1.646344426 | 1.258980476 | -0.38736395  | 0.5987712  | 0.766163984 |
| 110036022F | 44  | 1.593616357 | 1.365982786 | -0.22763357  | 0.59913133 | 0.766557951 |
| Lztf1      | 26  | 1.074782025 | 1.319535277 | 0.244753251  | 0.59938688 | 0.766684364 |
| Fgd6       | 55  | 1.236106419 | 1.056692075 | -0.179414344 | 0.59937746 | 0.766684364 |
| 100062C07F | 24  | 5.430762724 | 5.560956531 | 0.130193807  | 0.59934641 | 0.766684364 |
| Mtf1       | 40  | 1.746617896 | 1.56755747  | -0.179060426 | 0.59949062 | 0.766750224 |
| Gpn3       | 55  | 1.113778844 | 1.093202036 | -0.020576808 | 0.59966722 | 0.766775602 |
| Nampt      | 103 | 1.275255753 | 1.27531554  | 5.98E-05     | 0.59960486 | 0.766775602 |
| Zfp408     | 8   | 3.452350609 | 3.039181025 | -0.413169584 | 0.5996183  | 0.766775602 |
| Mapre2     | 55  | 1.776400784 | 1.556532286 | -0.219868498 | 0.59980448 | 0.766884287 |
| Zfp746     | 123 | 1.181413225 | 1.077735534 | -0.103677691 | 0.59987828 | 0.766906663 |
| Myl9       | 24  | 21.7270066  | 22.8459014  | 1.118894804  | 0.59992651 | 0.766906663 |
| Pfdn2      | 13  | 1.262486849 | 0.759745692 | -0.502741156 | 0.60007301 | 0.766960313 |
| Ncaph      | 31  | 1.196982463 | 1.030167072 | -0.166815391 | 0.60005125 | 0.766960313 |
| Prps113    | 10  | 0.107526882 | 0.35869177  | 0.251164888  | 0.60025764 | 0.767062672 |
| Alg6       | 11  | 0.336729206 | 0.82092704  | 0.484197835  | 0.60020729 | 0.767062672 |
| Cops2      | 28  | 1.645914179 | 1.767578892 | 0.121664713  | 0.60050087 | 0.767306671 |
| Ccdc172    | 5   | 92.36817204 | 92.8168499  | 0.448677859  | 0.60058091 | 0.767342126 |

|            |    |             |             |              |            |             |
|------------|----|-------------|-------------|--------------|------------|-------------|
| Cep290     | 34 | 1.396394365 | 1.836833243 | 0.440438878  | 0.6006767  | 0.767397695 |
| Lrrc3b     | 32 | 56.15425618 | 55.81869097 | -0.335565216 | 0.60076848 | 0.767448135 |
| Efna1      | 26 | 1.651269746 | 1.831367769 | 0.180098023  | 0.6010244  | 0.767708226 |
| Strap      | 9  | 1.063829787 | 0.444444444 | -0.619385343 | 0.60133644 | 0.7679731   |
| Hspe1      | 57 | 1.140903768 | 1.09935163  | -0.041552138 | 0.60131932 | 0.7679731   |
| Celf5      | 39 | 3.584816294 | 3.765605741 | 0.180789447  | 0.60152921 | 0.768152441 |
| Nipa2      | 55 | 1.101614284 | 1.045744518 | -0.055869767 | 0.60183477 | 0.768446213 |
| Pigl       | 54 | 1.42949682  | 1.357886233 | -0.071610587 | 0.601864   | 0.768446213 |
| Setdb2     | 9  | 1.080246914 | 0.957854406 | -0.122392507 | 0.60212805 | 0.768657894 |
| Gm4013     | 11 | 1.573170119 | 1.927706526 | 0.354536407  | 0.60213456 | 0.768657894 |
| Rbbp6      | 17 | 1.737833645 | 1.617743917 | -0.120089728 | 0.60229031 | 0.768789839 |
| Psmc2      | 20 | 0.767200047 | 0.827425108 | 0.060225061  | 0.60262511 | 0.769150284 |
| Slc25a27   | 17 | 1.72310399  | 1.335463997 | -0.387639993 | 0.60277646 | 0.769276549 |
| Ino80c     | 28 | 1.398542518 | 1.370223133 | -0.028319386 | 0.60305368 | 0.769429595 |
| Tomm6      | 25 | 1.242962852 | 1.61403226  | 0.371069408  | 0.60300795 | 0.769429595 |
| 10022K09F  | 30 | 2.061754361 | 2.021191306 | -0.040563055 | 0.60304503 | 0.769429595 |
| Entpd7     | 21 | 1.273846269 | 1.374691304 | 0.100845035  | 0.60336085 | 0.769728533 |
| Gnb5       | 61 | 1.363948021 | 1.646039283 | 0.282091262  | 0.60339289 | 0.769728533 |
| Ppp4r1l-ps | 7  | 0.707213579 | 0.868230048 | 0.16101647   | 0.60368047 | 0.769816392 |
| Ano6       | 79 | 1.361253064 | 1.10156417  | -0.259688894 | 0.60380309 | 0.769816392 |
| Fam76b     | 33 | 1.365147292 | 1.54101993  | 0.175872639  | 0.60367037 | 0.769816392 |
| Alg5       | 36 | 0.997254665 | 0.957252448 | -0.040002217 | 0.60379366 | 0.769816392 |
| Acbd4      | 9  | 1.789623759 | 1.444918083 | -0.344705676 | 0.60374621 | 0.769816392 |
| Fam45a     | 13 | 1.169218456 | 1.385772603 | 0.216554147  | 0.603829   | 0.769816392 |
| Rbl1       | 61 | 1.260522755 | 1.099533294 | -0.160989462 | 0.60368303 | 0.769816392 |
| Map3k2     | 69 | 1.151221474 | 1.064768655 | -0.086452819 | 0.60400342 | 0.769884153 |
| Eml5       | 61 | 1.127894763 | 0.931160306 | -0.196734457 | 0.60397123 | 0.769884153 |
| Trappc12   | 19 | 1.346520908 | 1.227297815 | -0.119223093 | 0.60408186 | 0.769884153 |
| Mtmr9      | 51 | 1.530898325 | 1.332979162 | -0.197919163 | 0.60409201 | 0.769884153 |
| Pias3      | 61 | 1.512446587 | 1.580368195 | 0.067921608  | 0.60416615 | 0.76991177  |
| Purb       | 93 | 1.039897381 | 0.961055191 | -0.07884219  | 0.60425187 | 0.76995414  |
| Ttc16      | 11 | 0.728491066 | 0.430202827 | -0.298288239 | 0.60459938 | 0.770263184 |
| Ptrh1      | 11 | 0.728491066 | 0.430202827 | -0.298288239 | 0.60459938 | 0.770263184 |
| Tdrd7      | 61 | 1.555782283 | 1.289593279 | -0.266189003 | 0.604671   | 0.770287548 |

|            |     |             |             |              |            |             |
|------------|-----|-------------|-------------|--------------|------------|-------------|
| Mypop      | 7   | 1.639851708 | 1.061512253 | -0.578339454 | 0.60474111 | 0.770309983 |
| Hsp90b1    | 41  | 1.659993512 | 1.972813787 | 0.312820275  | 0.60498345 | 0.770503659 |
| Gm10785    | 29  | 1.34222708  | 1.191925016 | -0.150302064 | 0.60505068 | 0.770503659 |
| Hyls1      | 46  | 1.380502092 | 1.131428129 | -0.249073964 | 0.60502477 | 0.770503659 |
| i00002K03F | 36  | 58.46533291 | 58.27810695 | -0.187225962 | 0.6056536  | 0.771204524 |
| Gnpnat1    | 68  | 1.943120058 | 1.788713114 | -0.154406944 | 0.60574704 | 0.771246484 |
| Lrfn4      | 31  | 1.421276266 | 1.318479147 | -0.102797118 | 0.60579167 | 0.771246484 |
| Ccz1       | 34  | 1.294695333 | 1.159794123 | -0.13490121  | 0.60587982 | 0.771291793 |
| Nucks1     | 28  | 1.222724161 | 1.054326198 | -0.168397963 | 0.60614293 | 0.771510258 |
| Mpz        | 8   | 1.415846494 | 0.941504509 | -0.474341985 | 0.60615659 | 0.771510258 |
| Chfr       | 12  | 1.928212505 | 1.905579911 | -0.022632595 | 0.60625517 | 0.771568808 |
| Slc25a15   | 96  | 1.140427269 | 1.003444927 | -0.136982342 | 0.60645346 | 0.771754235 |
| Per3       | 49  | 1.575014643 | 1.694035597 | 0.119020954  | 0.60666033 | 0.771816684 |
| Ttc9c      | 4   | 2.09715563  | 2.470240444 | 0.373084814  | 0.6066446  | 0.771816684 |
| Tex261     | 44  | 1.449721293 | 1.323990247 | -0.125731046 | 0.6065831  | 0.771816684 |
| Stxbp2     | 15  | 1.242612966 | 1.278676964 | 0.036063999  | 0.60685334 | 0.771995315 |
| Rnd1       | 6   | 1.873026085 | 1.468470596 | -0.404555489 | 0.60696116 | 0.771998622 |
| Imp3       | 24  | 0.584422466 | 1.067876782 | 0.483454316  | 0.60693939 | 0.771998622 |
| Fam212a    | 39  | 1.782789462 | 1.955621652 | 0.17283219   | 0.60706244 | 0.772060518 |
| Tet2       | 81  | 1.095695548 | 1.097932242 | 0.002236694  | 0.60718274 | 0.772079685 |
| Cyp51      | 40  | 0.725925833 | 0.843750776 | 0.117824943  | 0.60716751 | 0.772079685 |
| Thoc3      | 40  | 1.011539557 | 1.112426643 | 0.100887087  | 0.60726194 | 0.772113489 |
| Rab6a      | 30  | 1.231090117 | 1.080100877 | -0.15098924  | 0.60740725 | 0.772164425 |
| Mfsd11     | 43  | 1.825306899 | 1.443012325 | -0.382294574 | 0.60735859 | 0.772164425 |
| Prrt1      | 2   | 82.23426679 | 79.91596639 | -2.318300401 | 0.60753074 | 0.772244618 |
| Srp19      | 67  | 1.078060019 | 1.207856425 | 0.129796407  | 0.60760827 | 0.772244618 |
| Sdhb       | 34  | 1.521238075 | 1.40212732  | -0.119110755 | 0.60762821 | 0.772244618 |
| Clptm1l    | 39  | 1.186123391 | 1.077025336 | -0.109098056 | 0.60792103 | 0.77254986  |
| Ebag9      | 86  | 1.350948086 | 1.325728237 | -0.025219849 | 0.60798555 | 0.772564938 |
| Arf6       | 125 | 1.256569006 | 1.246141171 | -0.010427834 | 0.60806849 | 0.772603428 |
| Ppp1r12c   | 43  | 0.851867192 | 0.707142609 | -0.144724582 | 0.60855827 | 0.773158793 |
| Thrap3     | 62  | 1.608828156 | 1.618730045 | 0.009901888  | 0.60874308 | 0.773326629 |
| Snrpb      | 41  | 1.349483287 | 1.367050074 | 0.017566786  | 0.60882652 | 0.773365688 |
| Neu1       | 12  | 0.53369336  | 1.310325477 | 0.776632117  | 0.60889754 | 0.773388947 |

|           |     |             |             |              |            |             |
|-----------|-----|-------------|-------------|--------------|------------|-------------|
| Rab40c    | 11  | 1.427941221 | 1.428695826 | 0.000754605  | 0.60909849 | 0.773571257 |
| Tmem252   | 3   | 55.60373382 | 53.6365833  | -1.967150512 | 0.60919923 | 0.773571257 |
| Zeb1      | 31  | 1.201757997 | 1.297860289 | 0.096102292  | 0.6091969  | 0.773571257 |
| Yrdc      | 86  | 1.067466083 | 0.987922487 | -0.079543596 | 0.60925312 | 0.773572756 |
| Slc25a11  | 24  | 1.380775578 | 1.629480165 | 0.248704586  | 0.60935065 | 0.773627862 |
| Pdxdc1    | 41  | 1.161815038 | 0.946464612 | -0.215350426 | 0.60940197 | 0.773627862 |
| 10015D24F | 2   | 85.17316017 | 86.5728368  | 1.399676629  | 0.60960812 | 0.773822624 |
| Cxcl14    | 14  | 35.07504514 | 36.15765975 | 1.082614605  | 0.60966775 | 0.773831376 |
| Arnt      | 3   | 5.291005291 | 4.920101781 | -0.37090351  | 0.60979836 | 0.773930216 |
| Rfwd2     | 47  | 0.764078236 | 0.859681605 | 0.095603369  | 0.60999904 | 0.774117952 |
| Rmrp      | 12  | 1.054740872 | 1.128015658 | 0.073274786  | 0.61013457 | 0.774222987 |
| Jkamp     | 5   | 1.268055556 | 1.444772084 | 0.176716528  | 0.61021254 | 0.774254975 |
| Wdfy1     | 59  | 1.011990742 | 1.141764949 | 0.129774207  | 0.61035598 | 0.774370019 |
| Sar1a     | 35  | 2.011714273 | 2.073291504 | 0.061577231  | 0.61067001 | 0.774701452 |
| Olfrc658  | 2   | 75          | 73.19587629 | -1.804123711 | 0.61095017 | 0.774922882 |
| Mfap1a    | 2   | 1.968503937 | 1.111111111 | -0.857392826 | 0.61092237 | 0.774922882 |
| Chmp3     | 42  | 1.354126721 | 1.18711571  | -0.16701101  | 0.61102124 | 0.774946045 |
| B3galt6   | 29  | 0.93911863  | 0.629966253 | -0.309152377 | 0.61117134 | 0.775069422 |
| Mterf4    | 27  | 3.773015962 | 5.011452984 | 1.238437021  | 0.61125108 | 0.775103561 |
| Eif4g2    | 61  | 1.36326742  | 1.373009334 | 0.009741914  | 0.61143103 | 0.775197765 |
| Mta3      | 28  | 1.644215899 | 1.594111966 | -0.050103932 | 0.61141341 | 0.775197765 |
| Nxn       | 77  | 1.282553032 | 1.395928655 | 0.113375623  | 0.61152411 | 0.775248791 |
| Gsap      | 6   | 1.17743069  | 1.180776342 | 0.003345651  | 0.61169399 | 0.775397167 |
| Fam98a    | 42  | 1.776529278 | 1.50189508  | -0.274634199 | 0.61201254 | 0.775500946 |
| Drg1      | 43  | 1.33565307  | 1.326349933 | -0.009303137 | 0.61209295 | 0.775500946 |
| Zmym5     | 76  | 1.288992696 | 1.269255767 | -0.019736929 | 0.61206949 | 0.775500946 |
| St3gal1   | 35  | 1.693357631 | 1.525930871 | -0.16742676  | 0.61205082 | 0.775500946 |
| Fgfr11    | 119 | 3.450701932 | 3.298261681 | -0.152440251 | 0.61202142 | 0.775500946 |
| Snn       | 55  | 2.178939605 | 2.006481365 | -0.17245824  | 0.61192461 | 0.775500946 |
| Kifc2     | 6   | 3.484831933 | 3.276187271 | -0.208644661 | 0.61216386 | 0.775523824 |
| Alox8     | 3   | 5.832193342 | 6.116207951 | 0.284014609  | 0.61246975 | 0.775844364 |
| Mapkapk2  | 57  | 1.047304222 | 1.150137888 | 0.102833667  | 0.61275629 | 0.77584442  |
| Asb1      | 33  | 1.500896938 | 1.536632816 | 0.035735878  | 0.61265384 | 0.77584442  |
| Ankrd54   | 40  | 1.172471937 | 0.997137728 | -0.175334209 | 0.61278703 | 0.77584442  |

|            |     |             |             |              |            |             |
|------------|-----|-------------|-------------|--------------|------------|-------------|
| Sav1       | 123 | 1.019963879 | 0.894386063 | -0.125577815 | 0.61255382 | 0.77584442  |
| Tmem186    | 35  | 2.029324836 | 1.600046306 | -0.42927853  | 0.61260424 | 0.77584442  |
| Reep5      | 85  | 1.201791837 | 1.279654252 | 0.077862414  | 0.61278482 | 0.77584442  |
| Golga7     | 22  | 1.199138388 | 1.065032932 | -0.134105456 | 0.6133915  | 0.776542742 |
| Eno1b      | 16  | 2.438971724 | 2.632479668 | 0.193507944  | 0.61344649 | 0.776545359 |
| Ghdc       | 3   | 3.351369077 | 2.3115988   | -1.039770277 | 0.6137195  | 0.776556221 |
| I30035P11F | 5   | 1.24210348  | 1.733281778 | 0.491178297  | 0.61371967 | 0.776556221 |
| Nrarp      | 51  | 1.247428222 | 1.22743968  | -0.019988542 | 0.61364484 | 0.776556221 |
| Sord       | 4   | 2.75        | 2.5         | -0.25        | 0.61357764 | 0.776556221 |
| Thap7      | 53  | 2.116448623 | 2.038625553 | -0.07782307  | 0.61351548 | 0.776556221 |
| Frat2      | 68  | 0.98730029  | 1.210877779 | 0.22357749   | 0.61396725 | 0.776601618 |
| Rrm2b      | 43  | 1.50953833  | 1.249911245 | -0.259627085 | 0.61385875 | 0.776601618 |
| Tsku       | 79  | 1.520788047 | 1.587940483 | 0.067152436  | 0.61393156 | 0.776601618 |
| Tstd2      | 9   | 1.342080172 | 1.810068727 | 0.467988554  | 0.61386258 | 0.776601618 |
| I30403N18F | 2   | 63.13401442 | 64.70649659 | 1.572482171  | 0.61402296 | 0.776605143 |
| Camkmt     | 36  | 1.182284517 | 1.658785487 | 0.47650097   | 0.61419354 | 0.776651138 |
| Nmt2       | 43  | 0.968105103 | 0.933459307 | -0.034645796 | 0.6142181  | 0.776651138 |
| Sphk2      | 53  | 1.358761895 | 1.12241304  | -0.236348855 | 0.61412951 | 0.776651138 |
| I30555B11F | 10  | 1.299831927 | 0.795080913 | -0.504751014 | 0.61431629 | 0.776708356 |
| Nudt19     | 39  | 1.107484625 | 0.84085897  | -0.266625655 | 0.61454339 | 0.776759122 |
| Slc25a28   | 60  | 1.560155068 | 1.272769696 | -0.287385371 | 0.61456344 | 0.776759122 |
| Grb14      | 40  | 4.667310059 | 4.44216152  | -0.225148539 | 0.61447126 | 0.776759122 |
| Bckdhb     | 37  | 1.329122609 | 1.42232192  | 0.09319931   | 0.61456818 | 0.776759122 |
| Ubr4       | 35  | 1.227087629 | 1.166288214 | -0.060799414 | 0.61476306 | 0.776938521 |
| Srsf11     | 65  | 1.555611035 | 1.363971416 | -0.191639618 | 0.61496248 | 0.77712362  |
| Gfm1       | 3   | 2.5         | 2.315612316 | -0.184387684 | 0.615162   | 0.777308813 |
| Max        | 89  | 1.512525277 | 1.584389539 | 0.071864263  | 0.61540698 | 0.777542678 |
| Clk3       | 36  | 1.291555627 | 0.948089384 | -0.343466243 | 0.61545306 | 0.777542678 |
| Ssx2ip     | 80  | 2.140907369 | 1.651285252 | -0.489622117 | 0.61558795 | 0.777646138 |
| Baiap2l1   | 13  | 1.712610992 | 1.768050556 | 0.055439563  | 0.61567319 | 0.777686869 |
| Gpr180     | 77  | 1.196048321 | 1.115906926 | -0.080141395 | 0.61577469 | 0.777748138 |
| Gxylt1     | 53  | 1.217372139 | 1.379636532 | 0.162264394  | 0.61584379 | 0.777768464 |
| Tnk1       | 8   | 41.2018318  | 40.97813479 | -0.223697008 | 0.61631687 | 0.778231971 |
| Tex40      | 29  | 66.75229767 | 66.63258047 | -0.119717197 | 0.61629507 | 0.778231971 |

|            |     |             |             |              |            |             |
|------------|-----|-------------|-------------|--------------|------------|-------------|
| Acadl      | 30  | 1.591118687 | 1.481852304 | -0.109266384 | 0.61641671 | 0.778291071 |
| Tmem170    | 19  | 1.09719007  | 1.007700106 | -0.089489964 | 0.61707645 | 0.779057021 |
| Fbxl21     | 19  | 1.572856968 | 1.834962276 | 0.262105309  | 0.61719841 | 0.779143969 |
| Pex11g     | 2   | 5.924006908 | 6.506489215 | 0.582482306  | 0.61761682 | 0.77947099  |
| Brca1      | 9   | 1.666100644 | 1.290262874 | -0.37583777  | 0.6175672  | 0.77947099  |
| Ldlrap1    | 96  | 3.788645921 | 3.184898181 | -0.603747741 | 0.6175493  | 0.77947099  |
| Ccdc85b    | 32  | 1.177648056 | 1.258118771 | 0.080470716  | 0.61772218 | 0.779536912 |
| Hmgb2      | 88  | 1.271490826 | 1.20338748  | -0.068103346 | 0.61777872 | 0.779541232 |
| Gabbr1     | 16  | 2.012129747 | 2.670782181 | 0.658652433  | 0.61833921 | 0.780181386 |
| Tfeb       | 97  | 4.273686694 | 4.046144632 | -0.227542062 | 0.61857915 | 0.780349932 |
| Hormad2    | 21  | 80.06696379 | 79.28014715 | -0.786816647 | 0.61855902 | 0.780349932 |
| Atrn       | 53  | 0.985220284 | 0.775067253 | -0.210153031 | 0.61873179 | 0.780475395 |
| Lrrc20     | 10  | 1.409837338 | 1.52632495  | 0.116487612  | 0.61893969 | 0.780670532 |
| Daxx       | 38  | 1.400257758 | 1.417080141 | 0.016822383  | 0.61907743 | 0.780730918 |
| Tceb1      | 22  | 1.955438723 | 1.358412405 | -0.597026318 | 0.61909397 | 0.780730918 |
| Tmem234    | 17  | 0.925989086 | 1.11850997  | 0.192520884  | 0.61925038 | 0.780778182 |
| Ankrd17    | 101 | 0.973354663 | 0.879495844 | -0.093858819 | 0.61929108 | 0.780778182 |
| Asb3       | 11  | 0.737610622 | 1.136590239 | 0.398979617  | 0.61918915 | 0.780778182 |
| Tsen54     | 70  | 1.023737635 | 0.935279881 | -0.088457754 | 0.6194388  | 0.780854863 |
| Coq10b     | 82  | 1.338678442 | 1.210699696 | -0.127978746 | 0.61945832 | 0.780854863 |
| Rragc      | 98  | 1.380161542 | 1.30381977  | -0.076341771 | 0.61952719 | 0.78087459  |
| Tufm       | 17  | 1.435453502 | 1.160465214 | -0.274988288 | 0.6196146  | 0.780914325 |
| 130577N17F | 110 | 1.329613352 | 1.230258213 | -0.099355139 | 0.61966515 | 0.780914325 |
| Pop7       | 70  | 1.523616408 | 1.283846433 | -0.239769976 | 0.61972117 | 0.780917859 |
| Htatsf1    | 30  | 18.99791903 | 18.86748876 | -0.130430267 | 0.61983257 | 0.780991166 |
| Mir6947    | 6   | 93.5999972  | 93.44969463 | -0.150302569 | 0.61998517 | 0.781116368 |
| Psmc3      | 52  | 1.218188638 | 1.188168568 | -0.03002007  | 0.62016144 | 0.78127138  |
| Tbce       | 23  | 1.783438047 | 1.839667528 | 0.056229481  | 0.62036601 | 0.781320976 |
| Slc15a3    | 5   | 53.87337258 | 54.25798446 | 0.384611879  | 0.62037057 | 0.781320976 |
| Dnajb6     | 18  | 0.887221186 | 0.699048166 | -0.18817302  | 0.62029554 | 0.781320976 |
| Psmc13     | 16  | 0.91191278  | 0.511037467 | -0.400875314 | 0.62041379 | 0.781320976 |
| Ctnnbip1   | 42  | 1.281612425 | 1.359636804 | 0.078024378  | 0.62064221 | 0.781541564 |
| Clptm1     | 28  | 1.703455915 | 1.59249626  | -0.110959655 | 0.62096239 | 0.781877645 |
| Wdr83os    | 3   | 2           | 0.925925926 | -1.074074074 | 0.62154735 | 0.782412789 |

|            |     |             |             |              |            |             |
|------------|-----|-------------|-------------|--------------|------------|-------------|
| Nphs1os    | 13  | 33.93557957 | 42.68796711 | 8.752387538  | 0.62151857 | 0.782412789 |
| Atf5       | 36  | 1.486165585 | 1.356573159 | -0.129592426 | 0.62146037 | 0.782412789 |
| 700020I14R | 20  | 1.587891178 | 1.262226188 | -0.325664989 | 0.62225474 | 0.783096826 |
| Atl1       | 92  | 1.35020039  | 1.322269552 | -0.027930838 | 0.62218462 | 0.783096826 |
| Prrc1      | 63  | 1.163168369 | 1.040200254 | -0.122968114 | 0.62240877 | 0.783096826 |
| 10002D19F  | 12  | 1.292229964 | 1.33234679  | 0.040116825  | 0.62241095 | 0.783096826 |
| Ganab      | 28  | 1.381528363 | 1.19726792  | -0.184260443 | 0.62239686 | 0.783096826 |
| Rel        | 117 | 1.365164968 | 1.280765262 | -0.084399706 | 0.62229647 | 0.783096826 |
| Afg3l2     | 81  | 1.21272799  | 1.253022582 | 0.040294592  | 0.62256665 | 0.78309898  |
| Nr4a3      | 86  | 5.767362139 | 5.856751042 | 0.089388903  | 0.62262613 | 0.78309898  |
| 10Wsu102   | 56  | 1.75688423  | 1.559458244 | -0.197425986 | 0.62262271 | 0.78309898  |
| Rpl7a      | 10  | 1.375438596 | 1.189447591 | -0.185991006 | 0.62261649 | 0.78309898  |
| 133433G15F | 29  | 0.901018298 | 0.892487949 | -0.008530349 | 0.62268937 | 0.783111403 |
| Arrb2      | 34  | 1.258329485 | 1.521890353 | 0.263560868  | 0.62284482 | 0.783239777 |
| Nfkbib     | 19  | 1.63015364  | 1.980603096 | 0.350449457  | 0.62290844 | 0.783247158 |
| Gtf2h2     | 22  | 1.398706942 | 1.358603022 | -0.040103919 | 0.62295745 | 0.783247158 |
| Ppp2r2d    | 90  | 1.018401226 | 0.886937409 | -0.131463817 | 0.62331204 | 0.783491589 |
| 10022B05F  | 83  | 1.897909946 | 1.361072227 | -0.536837719 | 0.62323567 | 0.783491589 |
| Akt1       | 108 | 1.069228774 | 0.934458885 | -0.134769889 | 0.62328534 | 0.783491589 |
| Pcmt1      | 17  | 0.861736397 | 1.067046697 | 0.2053103    | 0.62350838 | 0.783671265 |
| Stard7     | 47  | 1.294919547 | 1.468744323 | 0.173824776  | 0.62360688 | 0.78372793  |
| Gpr160     | 29  | 3.261190671 | 3.307333503 | 0.046142832  | 0.62390006 | 0.783962111 |
| Clic1      | 3   | 3.947041687 | 3.231166248 | -0.715875439 | 0.62389329 | 0.783962111 |
| Erbp2      | 55  | 1.570800274 | 1.545418075 | -0.025382199 | 0.62425907 | 0.784346052 |
| Herpud1    | 13  | 0.93150649  | 0.877953963 | -0.053552527 | 0.62444908 | 0.784517615 |
| Mlx        | 12  | 1.805104884 | 1.281684946 | -0.523419938 | 0.62450605 | 0.784522031 |
| Frg1       | 40  | 1.486322428 | 1.336077359 | -0.150245069 | 0.6246908  | 0.784534387 |
| Prmt1      | 31  | 1.075572068 | 0.846621729 | -0.228950338 | 0.62489014 | 0.784534387 |
| Upf2       | 55  | 1.646545084 | 1.811140855 | 0.164595772  | 0.62487594 | 0.784534387 |
| Ankmy2     | 15  | 2.02640977  | 1.534086374 | -0.492323397 | 0.62476329 | 0.784534387 |
| Qtrtd1     | 17  | 1.362715802 | 1.961054335 | 0.598338533  | 0.62457232 | 0.784534387 |
| Pdia4      | 43  | 1.333783551 | 1.690678026 | 0.356894475  | 0.62485759 | 0.784534387 |
| Ap5b1      | 92  | 1.114986392 | 1.147806128 | 0.032819736  | 0.62467705 | 0.784534387 |
| Prdm4      | 87  | 1.415911867 | 1.296238799 | -0.119673068 | 0.62494551 | 0.784536782 |



|            |     |             |             |              |            |             |
|------------|-----|-------------|-------------|--------------|------------|-------------|
| Pigx       | 14  | 1.854893859 | 2.183282187 | 0.328388328  | 0.62525426 | 0.784857231 |
| Pgp        | 112 | 1.21325721  | 1.192676659 | -0.020580551 | 0.6253354  | 0.784891933 |
| Rfx3       | 55  | 0.963232263 | 0.773070488 | -0.190161775 | 0.62557194 | 0.785113414 |
| Ywhah      | 51  | 1.286090085 | 1.111884711 | -0.174205374 | 0.62561886 | 0.785113414 |
| Unc13d     | 6   | 3.250538472 | 3.458603082 | 0.20806461   | 0.62579754 | 0.785203343 |
| Smyd2      | 92  | 1.132499093 | 1.066337022 | -0.06616207  | 0.62578544 | 0.785203343 |
| Hexdc      | 5   | 0.567375887 | 0.683160415 | 0.115784528  | 0.62599016 | 0.785377879 |
| Taf5l      | 113 | 0.93966729  | 0.893353231 | -0.046314059 | 0.62622966 | 0.78554038  |
| Pxn        | 55  | 1.237028066 | 0.981967646 | -0.25506042  | 0.62629108 | 0.78554038  |
| Brpf3      | 108 | 1.662555943 | 1.491880798 | -0.170675145 | 0.62635633 | 0.78554038  |
| Slc4a1ap   | 35  | 1.514422785 | 1.399694689 | -0.114728096 | 0.62633788 | 0.78554038  |
| E4f1       | 11  | 1.280152472 | 1.574470011 | 0.294317539  | 0.62638735 | 0.78554038  |
| Mphosph10  | 30  | 1.605338497 | 1.194924756 | -0.410413741 | 0.62653898 | 0.785663388 |
| Hnrnp3     | 54  | 1.148692024 | 1.194633205 | 0.045941181  | 0.62661477 | 0.785691286 |
| Hdhd2      | 20  | 0.987324079 | 0.561367053 | -0.425957027 | 0.62677641 | 0.785826818 |
| Bcl6       | 65  | 0.871225233 | 1.047188486 | 0.175963254  | 0.62698482 | 0.785834576 |
| Atf1       | 121 | 0.974296678 | 0.807798996 | -0.166497682 | 0.62696274 | 0.785834576 |
| Yif1b      | 27  | 1.350850416 | 1.007079536 | -0.343770881 | 0.62690653 | 0.785834576 |
| Abcf3      | 9   | 1.685460842 | 1.673907293 | -0.011553549 | 0.62699681 | 0.785834576 |
| Aplp2      | 46  | 1.177283348 | 1.067063782 | -0.110219565 | 0.62710777 | 0.785839404 |
| Top3a      | 9   | 0.684276007 | 1.09529083  | 0.411014822  | 0.6270903  | 0.785839404 |
| Prpf38a    | 17  | 1.447773129 | 1.310554905 | -0.137218224 | 0.62752933 | 0.786233389 |
| Pcgf2      | 90  | 1.197688692 | 1.084305103 | -0.113383589 | 0.62752398 | 0.786233389 |
| Mex3c      | 139 | 1.039069243 | 1.05640747  | 0.017338227  | 0.62787901 | 0.786604339 |
| Rpl11      | 33  | 1.00359095  | 0.948826114 | -0.054764836 | 0.62798268 | 0.786667047 |
| Atp13a4    | 2   | 38.13559322 | 35.50724638 | -2.628346844 | 0.62809158 | 0.786690686 |
| Tex9       | 18  | 2.239619391 | 2.214150463 | -0.025468928 | 0.62810877 | 0.786690686 |
| Hsd17b10   | 1   | 25.58139535 | 28.24427481 | 2.66287946   | 0.62830653 | 0.786725881 |
| Rtn3       | 21  | 0.733482642 | 0.855505148 | 0.122022506  | 0.62840494 | 0.786725881 |
| i10038B21F | 8   | 1.20748337  | 1.41663695  | 0.209153579  | 0.62838091 | 0.786725881 |
| Ufm1       | 28  | 1.158910193 | 1.433924622 | 0.275014429  | 0.62825908 | 0.786725881 |
| Herc4      | 62  | 1.174675658 | 1.147891533 | -0.026784125 | 0.62839455 | 0.786725881 |
| Coq7       | 26  | 0.840428442 | 1.14853532  | 0.308106877  | 0.6285221  | 0.786762241 |
| Epc2       | 82  | 1.335666114 | 1.344325409 | 0.008659295  | 0.62854121 | 0.786762241 |

|            |     |             |             |              |            |             |
|------------|-----|-------------|-------------|--------------|------------|-------------|
| Eif3e      | 17  | 1.061873867 | 0.981314131 | -0.080559735 | 0.62861092 | 0.786782385 |
| Med13l     | 203 | 1.28217089  | 1.128874172 | -0.153296719 | 0.6286869  | 0.786810372 |
| 8-Mar      | 51  | 1.304327792 | 1.025743689 | -0.278584102 | 0.62874682 | 0.786818253 |
| Gsto2      | 22  | 0.928790412 | 0.697896784 | -0.230893628 | 0.62883485 | 0.786861312 |
| Smim8      | 5   | 2.04633239  | 2.344171464 | 0.297839074  | 0.62901333 | 0.786993721 |
| Crebbp     | 159 | 1.222325013 | 1.185363254 | -0.036961759 | 0.62904793 | 0.786993721 |
| Zscan12    | 21  | 2.198938276 | 1.611288137 | -0.587650138 | 0.62910157 | 0.786993723 |
| AA543186   | 28  | 1.330782769 | 1.489856091 | 0.159073322  | 0.62919107 | 0.787030518 |
| Pkd2       | 79  | 1.181566709 | 1.445106467 | 0.263539758  | 0.62923825 | 0.787030518 |
| Rnf7       | 18  | 1.624069062 | 1.507919195 | -0.116149867 | 0.62929204 | 0.787030718 |
| Sertad1    | 33  | 1.559477942 | 1.358377678 | -0.201100264 | 0.62959606 | 0.787343842 |
| Atp2a2     | 131 | 1.109815755 | 0.957375157 | -0.152440598 | 0.62989475 | 0.787650237 |
| Celf6      | 32  | 5.457650288 | 6.011033448 | 0.553383161  | 0.63007816 | 0.787745329 |
| Pop4       | 22  | 2.18955613  | 2.221191185 | 0.031635055  | 0.63006977 | 0.787745329 |
| Coq9       | 37  | 1.011698041 | 1.011135743 | -0.000562298 | 0.63041829 | 0.788036293 |
| Cox6a1     | 72  | 1.404960114 | 1.296458501 | -0.108501613 | 0.63041593 | 0.788036293 |
| Gsto1      | 28  | 1.665614079 | 1.50114543  | -0.164468649 | 0.63054626 | 0.788129111 |
| Vps53      | 6   | 1.181886896 | 0.78125     | -0.400636896 | 0.63072034 | 0.788178605 |
| 530045J12F | 81  | 1.390181624 | 1.193111045 | -0.197070579 | 0.63074699 | 0.788178605 |
| Zfp809     | 15  | 1.901239795 | 1.664334508 | -0.236905287 | 0.63064525 | 0.788178605 |
| Cstf2t     | 19  | 1.970725184 | 1.423761034 | -0.546964151 | 0.63086622 | 0.78826046  |
| Prpsap2    | 20  | 1.208206109 | 1.063918095 | -0.144288014 | 0.6312738  | 0.78870258  |
| Mea1       | 53  | 1.585710952 | 1.815145363 | 0.229434411  | 0.63140153 | 0.788743523 |
| 30031N03F  | 78  | 1.648466714 | 1.764875852 | 0.116409138  | 0.63141408 | 0.788743523 |
| Ccdc142    | 56  | 1.430942673 | 1.355105652 | -0.07583702  | 0.63179608 | 0.789153536 |
| Plk3       | 64  | 1.280028385 | 1.280437421 | 0.000409036  | 0.63196621 | 0.789231668 |
| Ndufb9     | 19  | 1.989463619 | 1.783330435 | -0.206133184 | 0.63192854 | 0.789231668 |
| Plekha3    | 99  | 4.008128052 | 3.63278168  | -0.375346372 | 0.6321187  | 0.78935493  |
| Fbxl12     | 39  | 2.02904122  | 1.977888105 | -0.051153114 | 0.63225842 | 0.789462219 |
| Surf6      | 32  | 1.942453188 | 1.905934551 | -0.036518637 | 0.63238108 | 0.789548201 |
| Tmem68     | 17  | 1.722941481 | 1.410232911 | -0.31270857  | 0.63246924 | 0.789591084 |
| Pdik1l     | 134 | 1.391512251 | 1.083052373 | -0.308459877 | 0.63266506 | 0.789768364 |
| Bach1      | 81  | 1.002709266 | 1.126564094 | 0.123854828  | 0.63289605 | 0.78992231  |
| Med21      | 26  | 1.722012465 | 1.502212242 | -0.219800223 | 0.63287306 | 0.78992231  |

|          |     |             |             |              |            |             |
|----------|-----|-------------|-------------|--------------|------------|-------------|
| Epb4.1   | 151 | 1.618253415 | 1.608611423 | -0.009641992 | 0.63314732 | 0.790107131 |
| Cnot6l   | 131 | 1.310830059 | 1.075369876 | -0.235460183 | 0.63315182 | 0.790107131 |
| Esrra    | 68  | 1.557874566 | 1.531650367 | -0.026224199 | 0.63332623 | 0.790257578 |
| Gm10549  | 8   | 0.754708005 | 0.913235117 | 0.158527112  | 0.63339127 | 0.790271527 |
| Bub1     | 17  | 1.453744984 | 1.523864637 | 0.070119653  | 0.63349287 | 0.790331098 |
| Atp5g1   | 6   | 2.279616698 | 1.772645329 | -0.50697137  | 0.63364324 | 0.790451489 |
| Adcy9    | 77  | 1.116372483 | 1.127075756 | 0.010703273  | 0.63389477 | 0.790698053 |
| Usp7     | 176 | 1.254690107 | 1.278823512 | 0.024133405  | 0.63402054 | 0.790787708 |
| Ric1     | 135 | 1.099513535 | 1.121277388 | 0.021763853  | 0.63411301 | 0.79083582  |
| Gdap1    | 5   | 36.39303492 | 37.65102844 | 1.257993518  | 0.63443477 | 0.79116987  |
| Gemin5   | 55  | 1.337496397 | 1.304790619 | -0.032705779 | 0.6345489  | 0.791244953 |
| Ubqln1   | 137 | 1.322289073 | 1.139187368 | -0.183101705 | 0.63469192 | 0.791356036 |
| Vaultrc5 | 10  | 1.369374253 | 1.601638599 | 0.232264346  | 0.63495996 | 0.791586171 |
| Mtbp     | 29  | 1.751341473 | 1.518954938 | -0.232386535 | 0.63501416 | 0.791586171 |
| Gmfb     | 12  | 0.691551801 | 0.802118418 | 0.110566617  | 0.63503833 | 0.791586171 |
| Slc25a1  | 93  | 1.657566256 | 1.561495418 | -0.096070837 | 0.63514953 | 0.791657534 |
| Mta2     | 70  | 1.099606095 | 1.063982476 | -0.035623619 | 0.63532163 | 0.791804791 |
| Cnot1    | 40  | 1.019580216 | 1.147601225 | 0.128021009  | 0.63537647 | 0.791805892 |
| Zfp507   | 50  | 0.827800203 | 1.260781048 | 0.432980845  | 0.63551541 | 0.791888566 |
| Txndc9   | 38  | 0.849219956 | 1.061257521 | 0.212037566  | 0.63555075 | 0.791888566 |
| Wdr61    | 12  | 1.097000012 | 1.502535357 | 0.405535345  | 0.63564448 | 0.79193811  |
| Hps3     | 34  | 1.736094593 | 1.428735745 | -0.307358847 | 0.63578637 | 0.79198041  |
| Nfkbiz   | 106 | 1.505124725 | 1.439820491 | -0.065304234 | 0.63576873 | 0.79198041  |
| Tmem41a  | 16  | 1.489677037 | 1.177493253 | -0.312183784 | 0.63586144 | 0.79200669  |
| Ddx17    | 19  | 1.407354904 | 1.634485366 | 0.227130462  | 0.63596657 | 0.7920704   |
| Smug1    | 5   | 0.540540541 | 1.100917431 | 0.560376891  | 0.63605309 | 0.79211093  |
| Atp5o    | 31  | 1.414275885 | 1.471418344 | 0.057142459  | 0.63615265 | 0.792167687 |
| Frmd6    | 69  | 1.09850876  | 1.139097202 | 0.040588442  | 0.63650276 | 0.792536397 |
| Ccnl2    | 48  | 1.035097544 | 0.859742442 | -0.175355102 | 0.63681166 | 0.792541383 |
| Shq1     | 9   | 0.354284474 | 0.624315736 | 0.270031262  | 0.63676791 | 0.792541383 |
| Ogfod3   | 22  | 0.381937051 | 0.424649603 | 0.042712553  | 0.63667397 | 0.792541383 |
| Smarcad1 | 58  | 0.993995576 | 0.703478729 | -0.290516847 | 0.63682737 | 0.792541383 |
| Med28    | 31  | 1.027777002 | 1.049932812 | 0.02215581   | 0.63688483 | 0.792541383 |
| Pls1     | 18  | 2.613919947 | 2.166779811 | -0.447140135 | 0.63672234 | 0.792541383 |

|           |    |             |             |              |            |             |
|-----------|----|-------------|-------------|--------------|------------|-------------|
| Slc39a13  | 40 | 1.681715644 | 1.288030778 | -0.393684866 | 0.63685029 | 0.792541383 |
| Fnbp4     | 46 | 0.77722052  | 0.866400617 | 0.089180098  | 0.63717144 | 0.792830809 |
| Pycr2     | 24 | 1.715103902 | 1.908256704 | 0.193152802  | 0.63731921 | 0.792947444 |
| Dennd4c   | 31 | 1.309017142 | 1.145132079 | -0.163885063 | 0.63737387 | 0.792948213 |
| Smg9      | 5  | 0.499004975 | 0.454545455 | -0.044459521 | 0.6377275  | 0.793259415 |
| Vps29     | 39 | 1.112540284 | 1.053647519 | -0.058892765 | 0.63773213 | 0.793259415 |
| Sympk     | 95 | 1.331091575 | 1.382115522 | 0.051023947  | 0.63798846 | 0.793443733 |
| Cstb      | 19 | 1.526866279 | 1.974600668 | 0.447734389  | 0.63794967 | 0.793443733 |
| Rpl6      | 29 | 0.746439955 | 0.833242032 | 0.086802077  | 0.63831539 | 0.793783055 |
| Top1      | 64 | 1.237772609 | 1.216815924 | -0.020956684 | 0.63839703 | 0.793817303 |
| Dffa      | 17 | 0.675920234 | 0.92464029  | 0.248720056  | 0.63868649 | 0.794109947 |
| Ddx28     | 6  | 0.510738272 | 0.790733591 | 0.279995319  | 0.63882182 | 0.794210915 |
| Ppap2c    | 27 | 1.519429961 | 1.655080506 | 0.135650545  | 0.63900782 | 0.794366234 |
| Cpsf4     | 20 | 1.735196527 | 1.399769784 | -0.335426743 | 0.63905502 | 0.794366234 |
| Fam8a1    | 48 | 1.285044519 | 1.187881354 | -0.097163165 | 0.63918797 | 0.794431956 |
| Utp18     | 59 | 1.100461642 | 1.001572634 | -0.098889008 | 0.63921617 | 0.794431956 |
| Plin2     | 4  | 2.672198016 | 2.82249742  | 0.150299404  | 0.63952973 | 0.794485208 |
| ChkbCpt1b | 26 | 1.208207894 | 1.133067644 | -0.07514025  | 0.63947918 | 0.794485208 |
| Galnt12   | 35 | 1.677051678 | 1.334472103 | -0.342579575 | 0.63952178 | 0.794485208 |
| Chkb      | 26 | 1.208207894 | 1.133067644 | -0.07514025  | 0.63947918 | 0.794485208 |
| Mdh2      | 62 | 1.205937654 | 1.407898867 | 0.201961213  | 0.63942415 | 0.794485208 |
| Vps8      | 55 | 1.04842574  | 1.204468658 | 0.156042919  | 0.63987919 | 0.794784772 |
| Slc27a6   | 3  | 42.46762558 | 41.83895338 | -0.628672196 | 0.63983139 | 0.794784772 |
| 19Bwg1357 | 32 | 1.870566047 | 1.852412918 | -0.018153129 | 0.63993964 | 0.794792578 |
| Fdx1l     | 38 | 1.40640953  | 1.47594052  | 0.06953099   | 0.64023495 | 0.795092044 |
| Ctsd      | 50 | 1.196430337 | 1.149196868 | -0.047233469 | 0.64036592 | 0.795187397 |
| Igfbp4    | 19 | 1.905162925 | 1.656709419 | -0.248453506 | 0.64049739 | 0.795283351 |
| Cfb       | 4  | 64.99409458 | 62.18511878 | -2.808975797 | 0.64073714 | 0.795513738 |
| Tacc3     | 28 | 0.818762819 | 0.865994966 | 0.047232147  | 0.6408658  | 0.795538846 |
| Unk       | 21 | 1.292517899 | 1.625486737 | 0.332968838  | 0.64082828 | 0.795538846 |
| Creb3     | 11 | 1.742951112 | 1.695779803 | -0.047171309 | 0.64095458 | 0.795581749 |
| Ntan1     | 15 | 0.456619278 | 0.345147716 | -0.111471562 | 0.64109669 | 0.795690842 |
| Klhl21    | 26 | 1.079562428 | 0.917394817 | -0.162167611 | 0.64115945 | 0.795701438 |
| Oraov1    | 21 | 1.560758777 | 1.161385884 | -0.399372894 | 0.64121786 | 0.795706626 |

|            |     |             |             |              |            |             |
|------------|-----|-------------|-------------|--------------|------------|-------------|
| Mkks       | 13  | 1.015816779 | 0.768890004 | -0.246926776 | 0.64168412 | 0.796150571 |
| Slx4ip     | 13  | 1.015816779 | 0.768890004 | -0.246926776 | 0.64168412 | 0.796150571 |
| Zbtb40     | 12  | 1.536879796 | 1.315992761 | -0.220887036 | 0.64179359 | 0.796151757 |
| Zfp11      | 24  | 1.917322277 | 1.831538686 | -0.085783592 | 0.64177878 | 0.796151757 |
| Pcbp1      | 178 | 1.164301984 | 1.212651999 | 0.048350015  | 0.64193418 | 0.796175276 |
| Rexo4      | 29  | 1.357722625 | 1.314582598 | -0.043140026 | 0.64208384 | 0.796175276 |
| Afmid      | 4   | 1.633986928 | 1.609170306 | -0.024816622 | 0.64205111 | 0.796175276 |
| Rfx2       | 73  | 0.953807199 | 1.036119584 | 0.082312384  | 0.64207563 | 0.796175276 |
| Parg       | 27  | 1.1217648   | 0.88258939  | -0.23917541  | 0.64206785 | 0.796175276 |
| Triobp     | 73  | 1.500014729 | 1.541162008 | 0.041147279  | 0.64222749 | 0.796286119 |
| Adam23     | 58  | 17.58851797 | 20.36813936 | 2.779621397  | 0.64231674 | 0.796329495 |
| Actg1      | 62  | 1.132939939 | 1.171153537 | 0.038213597  | 0.64298274 | 0.796875469 |
| Ezr        | 84  | 1.355007544 | 1.16950935  | -0.185498194 | 0.64284061 | 0.796875469 |
| Wdr91      | 41  | 2.120239164 | 2.287098137 | 0.166858973  | 0.64299625 | 0.796875469 |
| Cpsf3l     | 39  | 0.971792949 | 0.904479057 | -0.067313892 | 0.64293051 | 0.796875469 |
| Surf4      | 16  | 1.336597997 | 1.403241737 | 0.06664374   | 0.64302865 | 0.796875469 |
| Ppapdc3    | 5   | 72.56152329 | 68.43154814 | -4.129975146 | 0.64341355 | 0.797264959 |
| Lsm11      | 38  | 1.45667126  | 1.288493799 | -0.168177461 | 0.64345161 | 0.797264959 |
| Pdia6      | 50  | 5.207845094 | 5.227019699 | 0.019174605  | 0.64379615 | 0.797624514 |
| Cdc42ep2   | 7   | 2.515645693 | 2.53510339  | 0.019457697  | 0.64397848 | 0.797783051 |
| Atox1      | 40  | 4.987378935 | 5.139903502 | 0.152524567  | 0.64412701 | 0.797874203 |
| Tmem138    | 20  | 2.548873477 | 2.065721944 | -0.483151533 | 0.64426955 | 0.797874203 |
| Krtap17-1  | 6   | 58.40641709 | 57.13554949 | -1.270867598 | 0.64424191 | 0.797874203 |
| Smek1      | 74  | 0.915682433 | 1.08572941  | 0.170046978  | 0.64416857 | 0.797874203 |
| Cenpt      | 12  | 0.699672668 | 0.399553343 | -0.300119325 | 0.64437414 | 0.797884429 |
| Mdk        | 23  | 43.46192165 | 43.31634953 | -0.145572115 | 0.64438656 | 0.797884429 |
| Pfdn1      | 14  | 1.320221255 | 1.457250611 | 0.137029356  | 0.6445498  | 0.797951891 |
| F11r       | 18  | 1.322843852 | 1.024838135 | -0.298005717 | 0.64450969 | 0.797951891 |
| Rasal2     | 30  | 1.075125573 | 1.285410336 | 0.210284763  | 0.64477044 | 0.798090384 |
| Strn3      | 73  | 1.754406582 | 1.320123592 | -0.43428299  | 0.64473955 | 0.798090384 |
| Gcdh       | 23  | 1.854574876 | 1.933885094 | 0.079310218  | 0.64525259 | 0.798602117 |
| Aqp11      | 32  | 1.39087554  | 1.311650962 | -0.079224579 | 0.64529272 | 0.798602117 |
| Gdap2      | 35  | 1.745095303 | 1.561749444 | -0.183345859 | 0.64565954 | 0.798988708 |
| 110002F23F | 48  | 0.917032966 | 0.9713426   | 0.054309634  | 0.64577765 | 0.799067483 |

|            |     |             |             |              |            |             |
|------------|-----|-------------|-------------|--------------|------------|-------------|
| Pcdhgb1    | 3   | 58.51975981 | 57.15913681 | -1.360623003 | 0.64597765 | 0.799247553 |
| Zfp830     | 26  | 1.400967206 | 1.619280038 | 0.218312832  | 0.64620523 | 0.799369504 |
| Lgr4       | 102 | 1.552742403 | 1.281823672 | -0.270918731 | 0.64623964 | 0.799369504 |
| Wibg       | 30  | 1.116745478 | 1.481485495 | 0.364740017  | 0.64615178 | 0.799369504 |
| Nf2        | 57  | 1.603107035 | 1.430830962 | -0.172276073 | 0.64638952 | 0.799420123 |
| Egln3      | 37  | 1.943536601 | 1.966132467 | 0.022595866  | 0.64635667 | 0.799420123 |
| Pla2g12b   | 2   | 90.94977022 | 91.52034772 | 0.570577503  | 0.64656612 | 0.799571145 |
| Cd151      | 27  | 2.166408449 | 1.74877567  | -0.417632779 | 0.64702549 | 0.800037465 |
| Ano8       | 20  | 1.761230309 | 1.595744935 | -0.165485374 | 0.64705224 | 0.800037465 |
| .30024G19F | 6   | 7.86384199  | 8.383990891 | 0.520148902  | 0.64730515 | 0.80028274  |
| BC089491   | 36  | 20.84758076 | 22.30043352 | 1.452852757  | 0.64741368 | 0.800349477 |
| Ablim2     | 48  | 1.748769237 | 2.32117474  | 0.572405503  | 0.64762188 | 0.800361337 |
| Ephb1      | 34  | 33.61293799 | 33.35705636 | -0.255881627 | 0.64768182 | 0.800361337 |
| Senp6      | 38  | 1.542291646 | 1.738593405 | 0.196301759  | 0.64769598 | 0.800361337 |
| Tpt1       | 96  | 1.374163579 | 1.455501704 | 0.081338125  | 0.64749595 | 0.800361337 |
| Uspl1      | 5   | 1.697971273 | 1.560113713 | -0.13785756  | 0.64760064 | 0.800361337 |
| Ufd1l      | 8   | 2.474395501 | 2.237546939 | -0.236848562 | 0.64776564 | 0.8003695   |
| Itpr3      | 33  | 1.291751149 | 1.241103434 | -0.050647715 | 0.64781988 | 0.8003695   |
| Nipal2     | 38  | 7.856630463 | 8.438381231 | 0.581750769  | 0.64786622 | 0.8003695   |
| Map1s      | 53  | 1.120521315 | 1.280992636 | 0.16047132   | 0.64794177 | 0.800395444 |
| Jmjd6      | 43  | 1.442222642 | 1.306415774 | -0.135806868 | 0.64800149 | 0.800401838 |
| Aatk       | 30  | 31.1683545  | 31.00665764 | -0.161696859 | 0.64814315 | 0.800509436 |
| Fam43b     | 6   | 15.08470696 | 15.02312761 | -0.061579348 | 0.64862004 | 0.801031009 |
| Pygm       | 10  | 79.85207863 | 78.52413998 | -1.32793865  | 0.6490094  | 0.801444416 |
| Cad        | 45  | 3.752875659 | 3.740977937 | -0.011897722 | 0.64917764 | 0.801517262 |
| Mef2d      | 61  | 1.122368773 | 1.127799194 | 0.005430421  | 0.6491306  | 0.801517262 |
| Tbc1d14    | 43  | 1.345707819 | 1.723503748 | 0.377795929  | 0.64929366 | 0.801580027 |
| Crebzf     | 92  | 0.981568058 | 1.017426685 | 0.035858626  | 0.64933773 | 0.801580027 |
| Stxbp1     | 32  | 0.847165066 | 0.793735459 | -0.053429607 | 0.64955299 | 0.801719087 |
| Pet100     | 5   | 1.196039604 | 2.032008632 | 0.835969028  | 0.64955964 | 0.801719087 |
| Tmc7       | 16  | 1.335444711 | 1.063133816 | -0.272310895 | 0.64964823 | 0.80172827  |
| Zfp46      | 23  | 1.839018649 | 1.534752078 | -0.304266571 | 0.64967636 | 0.80172827  |
| Ccdc159    | 14  | 1.118752127 | 1.294460494 | 0.175708367  | 0.64990994 | 0.801881653 |
| Csgalnact2 | 10  | 1.020666425 | 1.418996011 | 0.398329586  | 0.64990217 | 0.801881653 |

|            |     |             |             |              |            |             |
|------------|-----|-------------|-------------|--------------|------------|-------------|
| Ube2s      | 17  | 0.998038332 | 0.778925847 | -0.219112486 | 0.6500495  | 0.801986409 |
| Ikbkg      | 5   | 11.76152981 | 11.12991736 | -0.631612453 | 0.65011867 | 0.802004314 |
| Gars       | 36  | 0.966274543 | 0.861080982 | -0.105193562 | 0.65041078 | 0.802297224 |
| Rsl24d1    | 41  | 1.481247122 | 1.369340712 | -0.11190641  | 0.65050614 | 0.802347404 |
| Wls        | 3   | 2.557251908 | 2.639178392 | 0.081926483  | 0.65066992 | 0.802481963 |
| C4b        | 2   | 47.57225434 | 46.1195542  | -1.452700131 | 0.65077903 | 0.802549083 |
| Amfr       | 90  | 1.131131753 | 1.1519268   | 0.020795047  | 0.65091888 | 0.802654091 |
| Gm15787    | 17  | 1.317296807 | 1.496050614 | 0.178753807  | 0.65158478 | 0.803407702 |
| Stx4a      | 39  | 1.394938684 | 1.218173172 | -0.176765513 | 0.65176627 | 0.803496449 |
| Ubiad1     | 13  | 1.784193327 | 1.302792325 | -0.481401002 | 0.65173654 | 0.803496449 |
| Cmtr2      | 20  | 1.906221959 | 1.59552201  | -0.31069995  | 0.65191546 | 0.803612858 |
| Nme3       | 6   | 1.9457112   | 0.873728326 | -1.071982874 | 0.65219067 | 0.803884574 |
| Foxk1      | 69  | 1.062050773 | 0.951315632 | -0.110735141 | 0.65302757 | 0.804411026 |
| Slc7a15    | 4   | 95.17343268 | 94.5433624  | -0.630070279 | 0.65280159 | 0.804411026 |
| Nxpe3      | 74  | 1.231996955 | 1.246823169 | 0.014826214  | 0.6532756  | 0.804411026 |
| Als2       | 51  | 1.309991082 | 1.323603567 | 0.013612485  | 0.6531639  | 0.804411026 |
| 321524J17R | 21  | 1.146113615 | 0.846778641 | -0.299334974 | 0.6532549  | 0.804411026 |
| 310021J22R | 8   | 1.287673297 | 1.26546892  | -0.022204377 | 0.65321499 | 0.804411026 |
| Nt5dc3     | 50  | 1.553167413 | 1.169194967 | -0.383972446 | 0.65267871 | 0.804411026 |
| Gm10778    | 3   | 1.786067134 | 1.877934272 | 0.091867138  | 0.6529902  | 0.804411026 |
| Syng1      | 39  | 6.288139373 | 5.199880375 | -1.088258997 | 0.65316813 | 0.804411026 |
| Serf1      | 64  | 1.355152795 | 1.113789175 | -0.24136362  | 0.65286025 | 0.804411026 |
| Helq       | 58  | 1.672342446 | 1.618167115 | -0.054175331 | 0.6529388  | 0.804411026 |
| Ssr2       | 8   | 1.756705589 | 1.576412154 | -0.180293436 | 0.65321417 | 0.804411026 |
| Tmco3      | 27  | 1.450331505 | 1.248575525 | -0.20175598  | 0.65341292 | 0.804512597 |
| Mtmr2      | 43  | 0.931407586 | 0.833332983 | -0.098074603 | 0.65348042 | 0.804528206 |
| Adss       | 55  | 1.138803479 | 1.111464632 | -0.027338847 | 0.65368742 | 0.804715538 |
| Lmod1      | 17  | 70.90720114 | 68.52852076 | -2.378680377 | 0.65378945 | 0.804759202 |
| Acvr2a     | 62  | 0.920499106 | 0.649697642 | -0.270801464 | 0.65383258 | 0.804759202 |
| Fkbpl      | 2   | 3.389830508 | 2.127659574 | -1.262170934 | 0.65390269 | 0.804778004 |
| Samd1      | 161 | 1.336537282 | 1.347010369 | 0.010473087  | 0.65411527 | 0.804972115 |
| Itsn2      | 116 | 1.283716574 | 1.139078042 | -0.144638532 | 0.65432965 | 0.805100893 |
| Phlpp2     | 68  | 1.409530152 | 1.229498832 | -0.18003132  | 0.65431346 | 0.805100893 |
| Necap1     | 23  | 1.201652782 | 1.384324193 | 0.182671411  | 0.65444821 | 0.805111757 |

|            |     |             |             |              |            |             |
|------------|-----|-------------|-------------|--------------|------------|-------------|
| Bms1       | 39  | 1.087218017 | 1.007132551 | -0.080085466 | 0.65441279 | 0.805111757 |
| Nuak2      | 11  | 0.528007346 | 0.679740578 | 0.151733232  | 0.6548115  | 0.805221146 |
| Eif4b      | 21  | 1.777605259 | 1.568239874 | -0.209365385 | 0.65478291 | 0.805221146 |
| Cpox       | 25  | 1.140544775 | 1.597783187 | 0.457238412  | 0.65469226 | 0.805221146 |
| Ube4b      | 20  | 1.848637085 | 1.693955933 | -0.154681153 | 0.65472537 | 0.805221146 |
| Mapk1ip1l  | 70  | 1.252450897 | 1.397734376 | 0.145283479  | 0.65469248 | 0.805221146 |
| Srrm1      | 71  | 1.256350458 | 1.125363524 | -0.130986933 | 0.65513643 | 0.80548571  |
| Bahcc1     | 22  | 1.214943603 | 1.305324876 | 0.090381274  | 0.65513224 | 0.80548571  |
| Vamp2      | 61  | 0.969218686 | 0.975239107 | 0.006020421  | 0.6552241  | 0.805526007 |
| Ankle1     | 27  | 1.494740599 | 1.303751998 | -0.190988601 | 0.65555387 | 0.80579641  |
| Fnbp1l     | 100 | 1.34867767  | 1.190381683 | -0.158295987 | 0.65551047 | 0.80579641  |
| Nsun2      | 34  | 1.407836069 | 0.909957869 | -0.4978782   | 0.65567305 | 0.80587539  |
| Zfp553     | 41  | 0.93173146  | 0.895530365 | -0.036201095 | 0.65577287 | 0.805921639 |
| Zdhhc20    | 96  | 1.183588809 | 1.196858304 | 0.013269495  | 0.65582052 | 0.805921639 |
| Slc30a4    | 89  | 0.895568519 | 0.909797676 | 0.014229157  | 0.65605258 | 0.805970052 |
| Trp53i13   | 57  | 1.974219535 | 2.046769885 | 0.07255035   | 0.65600125 | 0.805970052 |
| Mov10      | 48  | 1.777216854 | 1.645476774 | -0.13174008  | 0.65613454 | 0.805970052 |
| Gltscr1l   | 3   | 93.61128311 | 93.67737526 | 0.066092147  | 0.655984   | 0.805970052 |
| Kif9       | 10  | 1.912003961 | 1.861079146 | -0.050924815 | 0.65610259 | 0.805970052 |
| BC005561   | 42  | 1.020316765 | 0.750850011 | -0.269466754 | 0.65624982 | 0.806044179 |
| Fkbp4      | 62  | 1.187242178 | 1.067226509 | -0.120015669 | 0.65669069 | 0.806450678 |
| '00086O06F | 5   | 1.28440367  | 0.828402367 | -0.456001303 | 0.65665298 | 0.806450678 |
| Crabp2     | 8   | 10.3125192  | 10.54598954 | 0.233470337  | 0.65708869 | 0.806736906 |
| Actr2      | 86  | 1.533292211 | 1.41739864  | -0.115893571 | 0.65698081 | 0.806736906 |
| Wnt5a      | 52  | 24.77672751 | 26.42266402 | 1.645936506  | 0.65706179 | 0.806736906 |
| Psmc3      | 7   | 1.10211384  | 1.189546202 | 0.087432362  | 0.6572965  | 0.806924525 |
| Slc27a4    | 73  | 1.339190089 | 1.210577029 | -0.12861306  | 0.65736937 | 0.806946472 |
| Cryz       | 21  | 0.86661299  | 1.285914081 | 0.419301092  | 0.65748332 | 0.807018836 |
| Apopt1     | 34  | 0.974606678 | 1.268124132 | 0.293517455  | 0.65759161 | 0.807084253 |
| Tsen34     | 26  | 2.06853935  | 1.42015981  | -0.64837954  | 0.65781337 | 0.807153896 |
| '00021K19F | 11  | 2.073224694 | 1.84203172  | -0.231192974 | 0.65777978 | 0.807153896 |
| Hnrnp2     | 9   | 15.29387062 | 14.8742333  | -0.419637322 | 0.65772706 | 0.807153896 |
| Atp5g2     | 24  | 1.020693542 | 0.752864514 | -0.267829027 | 0.65799121 | 0.807304597 |
| Atg4c      | 7   | 1.385927505 | 1.643934169 | 0.258006664  | 0.65850877 | 0.80761389  |



|           |     |             |             |              |            |             |
|-----------|-----|-------------|-------------|--------------|------------|-------------|
| Rccd1     | 13  | 0.647319    | 0.679060985 | 0.031741985  | 0.65869989 | 0.80761389  |
| Phf21a    | 137 | 1.509731784 | 1.376745584 | -0.1329862   | 0.65859718 | 0.80761389  |
| Etohd2    | 17  | 1.58626347  | 1.396236107 | -0.190027363 | 0.65829864 | 0.80761389  |
| Cyth2     | 45  | 1.190242098 | 1.115393121 | -0.074848976 | 0.65873863 | 0.80761389  |
| Btf3l4    | 44  | 1.46422611  | 1.307490066 | -0.156736044 | 0.65850092 | 0.80761389  |
| Dcakd     | 29  | 0.797824023 | 0.811174013 | 0.01334999   | 0.65869847 | 0.80761389  |
| Tmem203   | 21  | 1.004681949 | 0.996945675 | -0.007736274 | 0.65837063 | 0.80761389  |
| 32415L05F | 34  | 1.31754559  | 1.511557074 | 0.194011484  | 0.65862654 | 0.80761389  |
| Ccdc138   | 27  | 2.049906882 | 1.77063611  | -0.279270772 | 0.65905873 | 0.807938829 |
| Vkorc1    | 8   | 16.10749164 | 15.96445659 | -0.143035048 | 0.65932916 | 0.808067829 |
| Anp32a    | 24  | 1.189372083 | 1.400163556 | 0.210791473  | 0.65928889 | 0.808067829 |
| Sec22c    | 20  | 1.479568295 | 1.619602054 | 0.140033759  | 0.65921927 | 0.808067829 |
| Cr1l      | 19  | 1.474939647 | 1.619949605 | 0.145009958  | 0.65946004 | 0.808160732 |
| Prickle4  | 17  | 2.519416249 | 2.718883084 | 0.199466835  | 0.65973059 | 0.808394578 |
| Zfp777    | 307 | 1.110647004 | 1.098173266 | -0.012473739 | 0.65979113 | 0.808394578 |
| Ttll1     | 23  | 3.118013967 | 3.052726216 | -0.06528775  | 0.65981613 | 0.808394578 |
| Gipc1     | 42  | 0.77668724  | 0.765211703 | -0.011475537 | 0.66016143 | 0.808750113 |
| Lrp2bp    | 1   | 44          | 48          | 4            | 0.6602591  | 0.808802234 |
| Sgsh      | 19  | 1.063180497 | 1.236492578 | 0.173312082  | 0.66032195 | 0.80881171  |
| Bdnf      | 108 | 16.34271363 | 18.57021434 | 2.227500702  | 0.66041967 | 0.808863893 |
| 30549G23F | 16  | 1.530199181 | 1.233557885 | -0.296641295 | 0.66050187 | 0.808894955 |
| Vps72     | 10  | 2.298228977 | 2.037688279 | -0.260540698 | 0.66055528 | 0.808894955 |
| Stx12     | 36  | 1.582854907 | 1.306959929 | -0.275894978 | 0.66063481 | 0.808924832 |
| Cflar     | 26  | 0.92553172  | 0.734521592 | -0.191010129 | 0.66070027 | 0.808937485 |
| P2rx4     | 9   | 0.664437586 | 0.433922167 | -0.230515418 | 0.6608396  | 0.809004686 |
| Mapkap1   | 22  | 0.795539678 | 0.890855996 | 0.095316319  | 0.66086542 | 0.809004686 |
| 30059L03F | 13  | 1.658741216 | 1.821918981 | 0.163177765  | 0.6609236  | 0.809008417 |
| Gm6225    | 10  | 1.217428442 | 1.045585776 | -0.171842666 | 0.66098877 | 0.809020699 |
| 10039K10F | 60  | 1.0867726   | 1.221051578 | 0.134278978  | 0.66125612 | 0.809145458 |
| Cep19     | 20  | 1.210350505 | 1.627471151 | 0.417120646  | 0.66116401 | 0.809145458 |
| Cep164    | 13  | 0.862477473 | 1.206549911 | 0.344072438  | 0.66124132 | 0.809145458 |
| Kif5a     | 13  | 5.253558179 | 6.189516618 | 0.93595844   | 0.66136944 | 0.809216637 |
| 30506C21F | 16  | 0.936006671 | 1.122555508 | 0.186548837  | 0.66142704 | 0.809219643 |
| Tmem18    | 19  | 1.382900994 | 1.397128262 | 0.014227268  | 0.66149019 | 0.80922943  |

|            |     |             |             |              |            |             |
|------------|-----|-------------|-------------|--------------|------------|-------------|
| I31440P22F | 58  | 1.693469605 | 1.437488523 | -0.255981082 | 0.66160873 | 0.809306973 |
| Psmc4      | 11  | 1.405221724 | 1.137149777 | -0.268071948 | 0.66182701 | 0.809506511 |
| Pgls       | 46  | 1.307745893 | 1.287491138 | -0.020254755 | 0.6619284  | 0.809563038 |
| Ncapd2     | 57  | 1.581923148 | 1.51637486  | -0.065548287 | 0.6622652  | 0.809907456 |
| Chst12     | 5   | 1.016144349 | 1.608391608 | 0.592247259  | 0.66240279 | 0.809969195 |
| Camta1     | 199 | 1.419366432 | 1.346075296 | -0.073291136 | 0.66242608 | 0.809969195 |
| Ngly1      | 29  | 1.318863377 | 1.189504301 | -0.129359075 | 0.66275504 | 0.810101409 |
| Nemf       | 14  | 1.523879735 | 1.942172006 | 0.418292271  | 0.66273206 | 0.810101409 |
| Bivm       | 4   | 3.121091176 | 3.671790673 | 0.550699497  | 0.66261746 | 0.810101409 |
| Vipr2      | 23  | 3.362760086 | 3.699935046 | 0.33717496   | 0.66268818 | 0.810101409 |
| Pramef12   | 4   | 90.14736524 | 89.86143559 | -0.285929651 | 0.66291352 | 0.810160151 |
| Rbm4       | 20  | 1.8892772   | 1.855037628 | -0.034239572 | 0.66286481 | 0.810160151 |
| Cbx6       | 63  | 1.100629017 | 1.110611385 | 0.009982368  | 0.66370256 | 0.810989377 |
| Npcd       | 63  | 1.100629017 | 1.110611385 | 0.009982368  | 0.66370256 | 0.810989377 |
| Mir132     | 23  | 1.550705228 | 1.400273682 | -0.150431546 | 0.66377188 | 0.811006547 |
| Mns1       | 8   | 1.797093029 | 1.449856176 | -0.347236853 | 0.66402397 | 0.811247007 |
| Dnal4      | 33  | 1.140156677 | 1.14788172  | 0.007725043  | 0.66409871 | 0.811270773 |
| Kif22      | 41  | 1.5561768   | 1.442134563 | -0.114042237 | 0.6647452  | 0.811435873 |
| Rbm34      | 10  | 2.595300887 | 1.173195615 | -1.422105272 | 0.66465017 | 0.811435873 |
| Epg5       | 24  | 1.526188846 | 1.392352568 | -0.133836278 | 0.66478114 | 0.811435873 |
| Arxes2     | 5   | 33.25212208 | 32.74750338 | -0.504618698 | 0.66480909 | 0.811435873 |
| Crif3      | 46  | 1.437973229 | 1.484356493 | 0.046383264  | 0.66466245 | 0.811435873 |
| Dclre1b    | 24  | 1.340524086 | 1.126886008 | -0.213638078 | 0.66478261 | 0.811435873 |
| Dnajc4     | 8   | 2.204370011 | 2.047214256 | -0.157155755 | 0.66436287 | 0.811435873 |
| Gca        | 26  | 3.540499614 | 3.850357304 | 0.30985769   | 0.66484214 | 0.811435873 |
| Wipi1      | 30  | 0.809549963 | 0.795140944 | -0.014409019 | 0.6647184  | 0.811435873 |
| Fam188a    | 25  | 1.772888934 | 1.90623538  | 0.133346445  | 0.66433685 | 0.811435873 |
| Gga1       | 44  | 1.101425718 | 1.07409371  | -0.027332008 | 0.66469787 | 0.811435873 |
| Nid2       | 24  | 48.76422246 | 48.40432135 | -0.359901109 | 0.6652737  | 0.811593966 |
| Xndc1      | 19  | 1.64550745  | 1.332120373 | -0.313387078 | 0.66531787 | 0.811593966 |
| Mef2a      | 114 | 1.616555088 | 1.552713972 | -0.063841116 | 0.66551728 | 0.811593966 |
| Usp6nl     | 142 | 1.30877697  | 1.124461061 | -0.184315909 | 0.66540477 | 0.811593966 |
| Sac3d1     | 38  | 0.817533291 | 0.649726519 | -0.167806772 | 0.66553909 | 0.811593966 |
| Grpel1     | 20  | 1.062250052 | 1.076359131 | 0.01410908   | 0.66510905 | 0.811593966 |

|            |     |             |             |              |            |             |
|------------|-----|-------------|-------------|--------------|------------|-------------|
| Krt39      | 1   | 86.11111111 | 88.46153846 | 2.35042735   | 0.66558006 | 0.811593966 |
| Lss        | 18  | 1.230942797 | 0.948045238 | -0.282897559 | 0.66518056 | 0.811593966 |
| Cpd        | 59  | 0.876364291 | 0.952232986 | 0.075868694  | 0.66553111 | 0.811593966 |
| Zfp202     | 51  | 1.455663982 | 1.374215871 | -0.081448111 | 0.66535228 | 0.811593966 |
| Xntrpc     | 19  | 1.64550745  | 1.332120373 | -0.313387078 | 0.66531787 | 0.811593966 |
| Metrn1     | 48  | 1.749689174 | 1.639461601 | -0.110227573 | 0.66593811 | 0.811902947 |
| Spin1      | 140 | 1.317441739 | 1.220879491 | -0.096562248 | 0.66605477 | 0.811902947 |
| Trmt61b    | 63  | 1.602043754 | 1.481088024 | -0.12095573  | 0.66602442 | 0.811902947 |
| Spns2      | 95  | 2.009952436 | 1.73330016  | -0.276652277 | 0.66599661 | 0.811902947 |
| Rnf8-cmtr1 | 20  | 1.10919375  | 0.9332024   | -0.17599135  | 0.66619597 | 0.811940171 |
| Rnf8       | 20  | 1.10919375  | 0.9332024   | -0.17599135  | 0.66619597 | 0.811940171 |
| Cyp2u1     | 23  | 3.716953445 | 3.939227738 | 0.222274293  | 0.66630174 | 0.812001638 |
| Sf3a2      | 66  | 1.192508282 | 0.967261849 | -0.225246433 | 0.66639694 | 0.812050221 |
| Erc5       | 34  | 1.801345374 | 2.011128986 | 0.209783612  | 0.66658986 | 0.812104605 |
| Raf1       | 80  | 0.951189518 | 1.02721262  | 0.076023102  | 0.6666076  | 0.812104605 |
| Ppp1r9b    | 51  | 1.311364673 | 1.1431514   | -0.168213273 | 0.66653876 | 0.812104605 |
| Rps3       | 20  | 1.1732373   | 1.424370809 | 0.251133509  | 0.66677587 | 0.812154966 |
| Cox7a2l    | 15  | 1.573454539 | 1.194566684 | -0.378887855 | 0.66674575 | 0.812154966 |
| Hal        | 5   | 53.42277433 | 56.14387856 | 2.721104232  | 0.66681498 | 0.812154966 |
| Rps27a     | 4   | 3.172381384 | 3.845085113 | 0.672703729  | 0.66698061 | 0.812289273 |
| Lnp        | 33  | 1.215437211 | 1.138449368 | -0.076987843 | 0.66718068 | 0.812465502 |
| Tep1       | 16  | 1.352217695 | 1.046520072 | -0.305697623 | 0.66752703 | 0.812819816 |
| Tmem128    | 20  | 0.780261173 | 0.70367199  | -0.076589183 | 0.66765197 | 0.812904492 |
| Ptgr2      | 16  | 1.617229205 | 1.267175387 | -0.350053818 | 0.66798749 | 0.813245536 |
| Dpep3      | 5   | 97.41094596 | 96.89642572 | -0.514520241 | 0.66809977 | 0.813314749 |
| Jak1       | 68  | 1.390031834 | 1.440498792 | 0.050466959  | 0.66837303 | 0.813579916 |
| Qpctl      | 7   | 1.171858016 | 1.316569039 | 0.144711023  | 0.66885808 | 0.814102809 |
| Noxo1      | 53  | 1.630255779 | 1.617956929 | -0.012298849 | 0.66891683 | 0.814106786 |
| i30001P10F | 6   | 10.45045045 | 9.829059829 | -0.621390621 | 0.66899272 | 0.814123385 |
| Slc29a3    | 17  | 1.957788408 | 1.956236851 | -0.001551558 | 0.66904143 | 0.814123385 |
| Abi1       | 29  | 1.011448789 | 1.156223633 | 0.144774844  | 0.66918124 | 0.814225998 |
| Zfp597     | 32  | 2.45363347  | 2.320527119 | -0.133106351 | 0.66945005 | 0.814485538 |
| Jag1       | 108 | 1.203360648 | 1.106407265 | -0.096953383 | 0.66963985 | 0.814648907 |
| Polr3g     | 50  | 1.568628407 | 1.476477651 | -0.092150756 | 0.66973521 | 0.814697377 |

|            |     |             |             |              |            |             |
|------------|-----|-------------|-------------|--------------|------------|-------------|
| Rad23a     | 34  | 1.371252877 | 1.365362051 | -0.005890826 | 0.66990317 | 0.814834139 |
| Abca5      | 10  | 1.02325211  | 0.814794216 | -0.208457894 | 0.66998655 | 0.81486802  |
| Myo9a      | 53  | 1.469309215 | 1.398382454 | -0.070926761 | 0.67022091 | 0.814882889 |
| Dancr      | 54  | 1.6815931   | 1.877910318 | 0.196317218  | 0.67017232 | 0.814882889 |
| Pgm2l1     | 41  | 1.391034522 | 1.212227046 | -0.178807476 | 0.67013799 | 0.814882889 |
| Pkmyt1     | 86  | 1.406871911 | 1.342664939 | -0.064206972 | 0.67007388 | 0.814882889 |
| Fbxl14     | 145 | 1.041933805 | 1.042599622 | 0.000665817  | 0.67053395 | 0.815195956 |
| Ptms       | 101 | 1.382118618 | 1.305819996 | -0.076298622 | 0.67077727 | 0.815221605 |
| Lyst       | 70  | 1.627476309 | 1.430092349 | -0.19738396  | 0.67074451 | 0.815221605 |
| Rad9a      | 25  | 1.142561126 | 1.225865575 | 0.08330445   | 0.67067992 | 0.815221605 |
| Epc1       | 73  | 1.17925739  | 0.939003952 | -0.240253438 | 0.67075757 | 0.815221605 |
| Trim8      | 104 | 1.170612492 | 1.259837159 | 0.089224668  | 0.67083832 | 0.815228277 |
| Nup35      | 37  | 1.947767015 | 1.743599867 | -0.204167148 | 0.67104078 | 0.815406787 |
| Txn2       | 21  | 2.229391964 | 2.317758636 | 0.088366672  | 0.6715165  | 0.815917296 |
| Trib2      | 42  | 3.281029803 | 3.2241981   | -0.056831702 | 0.6716302  | 0.815987873 |
| Ajuba      | 51  | 1.538631303 | 1.558538034 | 0.019906731  | 0.67179383 | 0.816060551 |
| Tmem160    | 45  | 1.211251916 | 1.041706546 | -0.16954537  | 0.67180124 | 0.816060551 |
| Cenpv      | 79  | 1.252024635 | 1.272418335 | 0.0203937    | 0.67214768 | 0.816413793 |
| Mettl15    | 1   | 5.882352941 | 4.954954955 | -0.927397986 | 0.67239282 | 0.816643949 |
| Ap2a2      | 60  | 1.274598533 | 1.106297622 | -0.168300911 | 0.67271802 | 0.816971305 |
| Enah       | 182 | 3.424693096 | 3.754875582 | 0.330182486  | 0.67296615 | 0.817205002 |
| Rchy1      | 40  | 1.118117788 | 1.079799681 | -0.038318107 | 0.6733004  | 0.817407969 |
| Erc6       | 28  | 1.507541413 | 1.460201649 | -0.047339764 | 0.67329448 | 0.817407969 |
| Trappc9    | 36  | 1.64719624  | 1.466230665 | -0.180965575 | 0.67325021 | 0.817407969 |
| Cend1      | 16  | 51.60344442 | 53.09304273 | 1.489598303  | 0.67347698 | 0.817554697 |
| Wnk1       | 77  | 1.802360958 | 1.888871756 | 0.086510797  | 0.67362099 | 0.817603983 |
| Fam210a    | 33  | 0.906079255 | 0.697195102 | -0.208884153 | 0.67362901 | 0.817603983 |
| Lsm5       | 13  | 1.139845647 | 1.092978098 | -0.04686755  | 0.67383115 | 0.817715289 |
| 700101l11R | 3   | 3.212498388 | 4.75943839  | 1.546940001  | 0.67383217 | 0.817715289 |
| Arglu1     | 29  | 1.209889673 | 0.925779468 | -0.284110205 | 0.67406086 | 0.817925163 |
| Car4       | 8   | 26.40010255 | 26.92048651 | 0.520383954  | 0.6741319  | 0.817943728 |
| Pknx1      | 121 | 1.098660575 | 0.964224589 | -0.134435986 | 0.67430285 | 0.818083509 |
| Rps19bp1   | 14  | 1.586875411 | 1.094692943 | -0.492182469 | 0.67439241 | 0.818118474 |
| lqgap2     | 81  | 1.300530807 | 1.093923365 | -0.206607443 | 0.67444318 | 0.818118474 |

|           |     |             |             |              |            |             |
|-----------|-----|-------------|-------------|--------------|------------|-------------|
| Ppm1d     | 55  | 1.031374677 | 1.012161791 | -0.019212886 | 0.67472207 | 0.818389123 |
| Mrpl17    | 30  | 1.331104614 | 1.138683312 | -0.192421302 | 0.67507975 | 0.818687621 |
| Fut11     | 54  | 1.037316447 | 1.063505005 | 0.026188558  | 0.67503108 | 0.818687621 |
| Otx2os1   | 7   | 36.03470991 | 36.68479018 | 0.650080264  | 0.67525807 | 0.818716928 |
| Fam32a    | 42  | 1.589188657 | 1.517427391 | -0.071761266 | 0.67536377 | 0.818716928 |
| Med10     | 33  | 1.815423784 | 1.810855753 | -0.004568031 | 0.67546253 | 0.818716928 |
| Atad2b    | 22  | 1.111047695 | 1.120181193 | 0.009133498  | 0.67533419 | 0.818716928 |
| Atp6v1h   | 28  | 1.238700713 | 0.993089505 | -0.245611208 | 0.67542926 | 0.818716928 |
| Rfx1      | 54  | 1.174686121 | 1.078752629 | -0.095933492 | 0.67549447 | 0.818716928 |
| Alad      | 44  | 1.23157913  | 1.17018973  | -0.061389399 | 0.67521374 | 0.818716928 |
| Sf1       | 49  | 1.276798757 | 1.015216988 | -0.261581769 | 0.67557533 | 0.81874731  |
| Zfand2a   | 25  | 1.684180266 | 1.754611573 | 0.070431308  | 0.6756333  | 0.818749944 |
| Drg2      | 13  | 1.452202269 | 1.386604412 | -0.065597857 | 0.67578642 | 0.818867873 |
| Tmco4     | 3   | 1.222332034 | 1.804417122 | 0.582085088  | 0.67587333 | 0.818905562 |
| Eif4a2    | 55  | 1.226422283 | 0.942748089 | -0.283674194 | 0.67608492 | 0.819028968 |
| Ndufs8    | 12  | 0.965281959 | 0.631123084 | -0.334158875 | 0.67608681 | 0.819028968 |
| Eil2      | 39  | 1.195209429 | 1.085483068 | -0.109726361 | 0.67643169 | 0.819311482 |
| Mxd4      | 32  | 0.92718896  | 0.931609142 | 0.004420182  | 0.67638039 | 0.819311482 |
| Crcp      | 32  | 1.372149875 | 1.532633683 | 0.160483808  | 0.67689281 | 0.819802331 |
| Cenpo     | 25  | 1.679058492 | 1.229292945 | -0.449765548 | 0.67727627 | 0.820131374 |
| Prpf18    | 14  | 1.460020218 | 1.492108963 | 0.032088745  | 0.67727497 | 0.820131374 |
| Serhl     | 4   | 2.977190876 | 2.996422182 | 0.019231306  | 0.67772516 | 0.820404138 |
| Pla2g6    | 10  | 2.741142845 | 2.233285811 | -0.507857035 | 0.67758497 | 0.820404138 |
| Mbtps1    | 97  | 1.128907604 | 0.881299869 | -0.247607735 | 0.67769142 | 0.820404138 |
| Myg1      | 13  | 22.31641384 | 22.06862059 | -0.247793242 | 0.6776184  | 0.820404138 |
| Cmc2      | 11  | 0.540350923 | 0.916923576 | 0.376572653  | 0.6780885  | 0.820776261 |
| E2f5      | 40  | 1.17926124  | 1.075454068 | -0.103807172 | 0.67826362 | 0.820920522 |
| Snrk      | 114 | 1.128625858 | 1.020492733 | -0.108133126 | 0.67838438 | 0.820998964 |
| Cpeb4     | 64  | 1.262503457 | 1.26501839  | 0.002514934  | 0.67845048 | 0.821011242 |
| Gtf2a1    | 142 | 1.297766552 | 1.106302224 | -0.191464328 | 0.67854138 | 0.821053535 |
| Rgl2      | 61  | 1.607410922 | 1.531983068 | -0.075427854 | 0.67869964 | 0.821177317 |
| Nat6      | 2   | 80.41554155 | 80.50348849 | 0.087946939  | 0.67888674 | 0.821335972 |
| 00003M07f | 29  | 22.31755642 | 21.73131992 | -0.586236499 | 0.67899981 | 0.821337332 |
| Carkd     | 37  | 1.26400445  | 1.235418376 | -0.028586074 | 0.67899194 | 0.821337332 |

|           |     |             |             |              |            |             |
|-----------|-----|-------------|-------------|--------------|------------|-------------|
| Glb1      | 8   | 3.240328405 | 3.572767231 | 0.332438826  | 0.67926714 | 0.821592976 |
| Cdc25b    | 19  | 2.073766306 | 1.411418513 | -0.662347794 | 0.67937068 | 0.82165049  |
| Exo1      | 32  | 1.577427902 | 1.85163014  | 0.274202238  | 0.67962762 | 0.821893499 |
| Arl15     | 57  | 2.954279711 | 2.691969823 | -0.262309888 | 0.67994467 | 0.822141402 |
| Mknk2     | 74  | 0.939138508 | 0.952882575 | 0.013744067  | 0.67990249 | 0.822141402 |
| Osbpl3    | 32  | 1.323896957 | 1.188350634 | -0.135546323 | 0.68056641 | 0.822825367 |
| Smek2     | 60  | 1.231753469 | 1.092242374 | -0.139511096 | 0.68069412 | 0.822911976 |
| Anp32e    | 12  | 2.409430439 | 1.995021047 | -0.414409392 | 0.68084113 | 0.823021895 |
| Ap5z1     | 45  | 1.355980799 | 1.280293471 | -0.075687329 | 0.68101378 | 0.823094984 |
| Olfml2b   | 43  | 3.111955356 | 3.619679607 | 0.507724251  | 0.6809935  | 0.823094984 |
| Polr3f    | 23  | 1.660905925 | 1.323751228 | -0.337154697 | 0.68115493 | 0.823129987 |
| Pikfyve   | 21  | 1.607560622 | 1.480290354 | -0.127270267 | 0.68113887 | 0.823129987 |
| AW549877  | 11  | 0.838943982 | 0.712783979 | -0.126160003 | 0.68134259 | 0.823153395 |
| Wbscr17   | 42  | 56.70006428 | 55.56987915 | -1.130185128 | 0.68124153 | 0.823153395 |
| Mrpl52    | 30  | 1.90921222  | 1.653650893 | -0.255561327 | 0.68133324 | 0.823153395 |
| Thoc7     | 77  | 0.923252839 | 0.901687585 | -0.021565254 | 0.68154481 | 0.823329916 |
| Evx1      | 8   | 36.73863169 | 36.44060131 | -0.298030383 | 0.68169002 | 0.823369766 |
| 10070M22f | 41  | 1.073610288 | 1.154589331 | 0.080979043  | 0.68168524 | 0.823369766 |
| Kif3c     | 52  | 1.762744062 | 1.649618246 | -0.113125816 | 0.68184913 | 0.823494164 |
| Bptf      | 127 | 1.218152997 | 1.309515034 | 0.091362037  | 0.68212027 | 0.823665359 |
| Scamp4    | 37  | 0.933586836 | 1.077665519 | 0.144078683  | 0.68207647 | 0.823665359 |
| Chrna5    | 2   | 25.62789323 | 27.35294118 | 1.725047943  | 0.68215927 | 0.823665359 |
| Timm44    | 9   | 0.90796679  | 0.723273455 | -0.184693336 | 0.68238994 | 0.823876089 |
| Rfesd     | 8   | 1.327262083 | 1.194415457 | -0.132846626 | 0.6825441  | 0.823994411 |
| Zic1      | 15  | 42.27927332 | 43.45597293 | 1.176699609  | 0.68285794 | 0.824305485 |
| Rspry1    | 46  | 1.394671753 | 1.312988956 | -0.081682796 | 0.6830704  | 0.82449412  |
| Mir3091   | 16  | 1.03265261  | 0.870442165 | -0.162210445 | 0.68333525 | 0.82474597  |
| Zc3h8     | 26  | 2.321477935 | 2.048679934 | -0.272798001 | 0.68363401 | 0.825038696 |
| 6-Mar     | 111 | 1.037026236 | 0.9556879   | -0.081338336 | 0.68377734 | 0.825131125 |
| 30426L09F | 52  | 0.899649254 | 0.90488948  | 0.005240226  | 0.68382306 | 0.825131125 |
| Minpp1    | 69  | 1.146060486 | 1.013716111 | -0.132344376 | 0.68392604 | 0.825187532 |
| Ppp1r15b  | 73  | 0.926218912 | 0.781092689 | -0.145126224 | 0.68442989 | 0.825727552 |
| Tbc1d8b   | 2   | 22.42194766 | 21.26618903 | -1.155758622 | 0.68454853 | 0.82573491  |
| Sh3bp1    | 27  | 1.965114504 | 2.008705839 | 0.043591335  | 0.68453326 | 0.82573491  |

|            |     |             |             |              |            |             |
|------------|-----|-------------|-------------|--------------|------------|-------------|
| Zfp142     | 25  | 1.148545887 | 0.85082375  | -0.297722137 | 0.6846898  | 0.825769554 |
| Stat6      | 7   | 2.018226759 | 1.142238344 | -0.875988415 | 0.68467872 | 0.825769554 |
| Rexo1      | 34  | 1.451726603 | 1.259047099 | -0.192679504 | 0.68488806 | 0.82594078  |
| Sepw1      | 12  | 0.673064369 | 0.780292679 | 0.107228311  | 0.68497295 | 0.825975267 |
| Eif4e2     | 54  | 1.414196784 | 1.14033151  | -0.273865274 | 0.68509274 | 0.826051832 |
| Gm11762    | 26  | 1.663802573 | 1.420828565 | -0.242974008 | 0.68532406 | 0.826194975 |
| Zfyve16    | 78  | 1.237770936 | 1.068381116 | -0.169389821 | 0.68530762 | 0.826194975 |
| Sec16a     | 63  | 1.467602281 | 1.292815027 | -0.174787254 | 0.68564961 | 0.826519541 |
| Slc30a7    | 39  | 1.739573824 | 1.728372615 | -0.011201209 | 0.68591747 | 0.826774513 |
| Kat2b      | 50  | 0.939773479 | 0.908241418 | -0.031532061 | 0.68600195 | 0.826808434 |
| Mir7071    | 50  | 0.901816166 | 1.038878596 | 0.13706243   | 0.68618257 | 0.826958196 |
| Abce1      | 29  | 0.994924279 | 1.051940562 | 0.057016283  | 0.68635699 | 0.827032557 |
| Cisd3      | 35  | 1.075691039 | 1.382291804 | 0.306600765  | 0.68632939 | 0.827032557 |
| Ankrd28    | 137 | 1.184287457 | 1.080572719 | -0.103714737 | 0.68662887 | 0.827292228 |
| Xrcc1      | 48  | 1.226138729 | 1.028519158 | -0.19761957  | 0.68686233 | 0.82747009  |
| Zfp931     | 7   | 3.880589498 | 3.699171529 | -0.181417969 | 0.68688927 | 0.82747009  |
| Gpr137     | 65  | 1.387442736 | 1.323775873 | -0.063666863 | 0.68705869 | 0.827606242 |
| Abca16     | 6   | 84.68704966 | 85.01165875 | 0.324609087  | 0.68727537 | 0.827799287 |
| Aunip      | 26  | 1.347723729 | 1.236713463 | -0.111010266 | 0.68737315 | 0.827849119 |
| Mgat1      | 42  | 2.0019412   | 1.997292614 | -0.004648586 | 0.68751572 | 0.827952871 |
| Ireb2      | 58  | 1.841840547 | 1.447189219 | -0.394651328 | 0.68797765 | 0.828387557 |
| Serf2      | 73  | 1.240492476 | 1.035451903 | -0.205040574 | 0.68798958 | 0.828387557 |
| Bcap29     | 57  | 1.057715045 | 1.167967605 | 0.11025256   | 0.68827815 | 0.82846309  |
| Zfp330     | 23  | 1.484907166 | 1.087392971 | -0.397514195 | 0.68822355 | 0.82846309  |
| Nf1        | 80  | 1.740207329 | 1.559261395 | -0.180945934 | 0.68817546 | 0.82846309  |
| Saraf      | 10  | 1.730247719 | 1.823675205 | 0.093427486  | 0.68826267 | 0.82846309  |
| Tbck       | 22  | 0.811439122 | 0.763864647 | -0.047574475 | 0.68840401 | 0.828546624 |
| Kdm1b      | 67  | 1.705429226 | 1.496814918 | -0.208614307 | 0.68855388 | 0.828659037 |
| Cox10      | 16  | 1.482806296 | 1.74136872  | 0.258562424  | 0.688662   | 0.828721188 |
| Bhlhe41    | 61  | 2.139367665 | 2.015709396 | -0.123658269 | 0.68872314 | 0.828726803 |
| Cenpb      | 48  | 1.205891734 | 1.319285682 | 0.113393948  | 0.68888957 | 0.828859101 |
| Gnptg      | 12  | 1.377060098 | 1.619859497 | 0.242799399  | 0.6889896  | 0.828911483 |
| Bpgm       | 14  | 1.946927942 | 1.721024141 | -0.225903801 | 0.68909183 | 0.82891895  |
| I30405H02F | 39  | 1.15909712  | 1.007407113 | -0.151690006 | 0.68910878 | 0.82891895  |

|            |     |             |             |              |            |             |
|------------|-----|-------------|-------------|--------------|------------|-------------|
| Ankrd34b   | 23  | 12.03481308 | 11.28486503 | -0.749948052 | 0.68939052 | 0.829163699 |
| Zc3h18     | 112 | 1.284842385 | 1.236223078 | -0.048619306 | 0.68942526 | 0.829163699 |
| Sh3d19     | 4   | 98.43638982 | 98.09355255 | -0.34283726  | 0.68950028 | 0.829185965 |
| Ggact      | 68  | 1.307134614 | 1.40219127  | 0.095056656  | 0.68956582 | 0.829196822 |
| Gins2      | 9   | 2.327208255 | 1.994919849 | -0.332288406 | 0.6896925  | 0.829213257 |
| Exoc6      | 70  | 1.291608628 | 1.345017375 | 0.053408746  | 0.6896695  | 0.829213257 |
| Tmem64     | 91  | 1.167969114 | 1.012721463 | -0.155247651 | 0.69011099 | 0.829648426 |
| Pea15a     | 21  | 1.491355699 | 1.608618522 | 0.117262822  | 0.69034944 | 0.829867099 |
| Tmf1       | 86  | 1.338831007 | 1.224715079 | -0.114115928 | 0.69048773 | 0.829965352 |
| Txnl1      | 34  | 1.353101829 | 1.366390802 | 0.013288973  | 0.69085883 | 0.83034339  |
| Strn4      | 17  | 1.911066914 | 1.645544099 | -0.265522816 | 0.6911951  | 0.830651013 |
| Pdcl       | 4   | 0.235849057 | 0.555555556 | 0.319706499  | 0.69122799 | 0.830651013 |
| Mmp17      | 50  | 2.311856757 | 2.053587753 | -0.258269005 | 0.69130202 | 0.830671951 |
| Tmem230    | 21  | 1.087711508 | 1.063516528 | -0.02419498  | 0.69143507 | 0.830763791 |
| Cpt1a      | 12  | 0.688749798 | 1.136177956 | 0.447428158  | 0.69154405 | 0.830797586 |
| Pole       | 26  | 1.719338337 | 1.447582754 | -0.271755583 | 0.69157643 | 0.830797586 |
| Cry1       | 143 | 1.093023966 | 0.99500102  | -0.098022946 | 0.69175777 | 0.830947412 |
| Wdr41      | 18  | 1.238734152 | 1.08312356  | -0.155610592 | 0.69196624 | 0.831129791 |
| Fadd       | 48  | 1.314274758 | 1.582027036 | 0.267752278  | 0.69208992 | 0.83114228  |
| Erc3       | 13  | 1.349672064 | 1.249657149 | -0.100014915 | 0.69206692 | 0.83114228  |
| Flywch2    | 10  | 3.382312925 | 1.695156695 | -1.68715623  | 0.69222944 | 0.831173786 |
| Phf1       | 28  | 1.292347315 | 1.328114746 | 0.035767432  | 0.69218544 | 0.831173786 |
| Ankrd44    | 94  | 2.063709881 | 2.273227357 | 0.209517476  | 0.69257612 | 0.831427733 |
| I30453N24F | 19  | 1.832343507 | 1.659059164 | -0.173284343 | 0.69259909 | 0.831427733 |
| Zc3h7b     | 22  | 1.358153936 | 1.126828139 | -0.231325798 | 0.69261092 | 0.831427733 |
| Wipf1      | 82  | 8.203252711 | 9.087116863 | 0.883864152  | 0.69299341 | 0.831598052 |
| Fbxl8      | 24  | 1.411766452 | 1.122487189 | -0.289279263 | 0.69310032 | 0.831598052 |
| Iars       | 4   | 22.56681178 | 24.31286222 | 1.746050448  | 0.69292354 | 0.831598052 |
| Zfp799     | 5   | 1.584891252 | 1.768925558 | 0.184034306  | 0.69331952 | 0.831598052 |
| Map4k3     | 104 | 2.035742721 | 1.637285095 | -0.398457627 | 0.69312957 | 0.831598052 |
| Eif1       | 10  | 0.261693963 | 0.458715596 | 0.197021633  | 0.69296694 | 0.831598052 |
| Tubgcp6    | 31  | 1.087206531 | 1.085564154 | -0.001642377 | 0.69327142 | 0.831598052 |
| Mios       | 89  | 1.108153839 | 1.015354652 | -0.092799187 | 0.69284136 | 0.831598052 |
| Apaf1      | 77  | 1.261784728 | 1.245056377 | -0.016728351 | 0.69326217 | 0.831598052 |



|            |     |             |             |              |            |             |
|------------|-----|-------------|-------------|--------------|------------|-------------|
| Setd5      | 61  | 1.450222527 | 1.214121369 | -0.236101158 | 0.69318243 | 0.831598052 |
| Klhdc10    | 51  | 1.458644283 | 1.433990664 | -0.024653619 | 0.69347631 | 0.831718134 |
| Mir212     | 54  | 1.820738973 | 2.17979784  | 0.359058868  | 0.69359968 | 0.831798113 |
| 310037117R | 42  | 1.094053299 | 1.074741868 | -0.019311432 | 0.6937366  | 0.831894328 |
| Stx5a      | 4   | 1.252819791 | 1.108538059 | -0.144281732 | 0.69406733 | 0.832222912 |
| Spg7       | 86  | 1.281159748 | 1.265396375 | -0.015763373 | 0.6943217  | 0.832459891 |
| Abhd6      | 4   | 2.001188171 | 1.369215635 | -0.631972536 | 0.69440054 | 0.832486401 |
| Pik3r2     | 55  | 1.533220488 | 1.334520987 | -0.198699501 | 0.69451576 | 0.832556516 |
| Apbb3      | 6   | 0.27100271  | 0.600600601 | 0.329597891  | 0.6947211  | 0.832734634 |
| Rhobtb1    | 58  | 1.190985426 | 1.249377323 | 0.058391896  | 0.69482619 | 0.83279258  |
| Mrpl4      | 36  | 1.322299289 | 1.179861937 | -0.142437353 | 0.69519261 | 0.833163696 |
| Lsm12      | 38  | 0.79202923  | 1.188200005 | 0.396170774  | 0.69544369 | 0.83339655  |
| Zfp428     | 38  | 1.430288485 | 1.066141253 | -0.364147232 | 0.69586454 | 0.833832778 |
| Ccdc125    | 22  | 1.525817969 | 1.018438578 | -0.507379391 | 0.69595299 | 0.833870673 |
| Nicn1      | 7   | 3.237377814 | 2.458761282 | -0.778616531 | 0.6962606  | 0.834073358 |
| Cuta       | 81  | 1.488505069 | 1.326993056 | -0.161512014 | 0.69624277 | 0.834073358 |
| Tmem237    | 60  | 1.576688019 | 1.572127684 | -0.004560335 | 0.69629267 | 0.834073358 |
| Zfp959     | 6   | 1.841620626 | 0.995653518 | -0.845967108 | 0.69639807 | 0.834131517 |
| Dusp11     | 4   | 3.106261655 | 2.999465258 | -0.106796397 | 0.69686045 | 0.83454006  |
| Il17rd     | 82  | 1.724680129 | 1.630769126 | -0.093911004 | 0.69690977 | 0.83454006  |
| Trappc11   | 8   | 1.072937088 | 1.541749064 | 0.468811976  | 0.69684203 | 0.83454006  |
| Nbn        | 64  | 1.399321682 | 1.257546594 | -0.141775088 | 0.69705959 | 0.834606448 |
| Hjurp      | 5   | 2.110315524 | 1.605930571 | -0.504384953 | 0.69707896 | 0.834606448 |
| Enoph1     | 81  | 0.818714908 | 0.788008676 | -0.030706231 | 0.69716142 | 0.834637084 |
| Prr23a2    | 13  | 84.71101803 | 84.21920272 | -0.491815308 | 0.69730553 | 0.834741509 |
| Xpo7       | 111 | 1.064140385 | 0.945927396 | -0.118212988 | 0.69744016 | 0.834766467 |
| Mir290a    | 3   | 85.43891958 | 84.70004669 | -0.738872897 | 0.69743124 | 0.834766467 |
| Aktip      | 49  | 3.455888451 | 2.967853179 | -0.488035272 | 0.69782728 | 0.835161698 |
| Isg20l2    | 32  | 0.964341432 | 1.13729138  | 0.172949947  | 0.69830254 | 0.835662332 |
| Arfgap1    | 70  | 1.673414154 | 1.607891024 | -0.06552313  | 0.69852825 | 0.835805544 |
| Nup133     | 42  | 1.254090746 | 1.00311366  | -0.250977086 | 0.69854009 | 0.835805544 |
| Tmem141    | 10  | 1.882022511 | 2.247280811 | 0.3652583    | 0.69859309 | 0.835805544 |
| Cep63      | 54  | 1.248406037 | 1.100371326 | -0.148034711 | 0.69881323 | 0.836000758 |
| Sap30l     | 80  | 0.995088649 | 0.974870628 | -0.02021802  | 0.69913245 | 0.836295199 |

|           |    |             |             |              |            |             |
|-----------|----|-------------|-------------|--------------|------------|-------------|
| Ankrd45   | 12 | 55.64376405 | 54.65241532 | -0.991348725 | 0.69923273 | 0.836295199 |
| Srfbp1    | 48 | 1.182614615 | 0.920476856 | -0.262137758 | 0.69923692 | 0.836295199 |
| Kif15     | 8  | 2.029429879 | 1.572220413 | -0.457209467 | 0.69928732 | 0.836295199 |
| Tm9sf2    | 58 | 1.380947697 | 1.168869328 | -0.212078369 | 0.6993498  | 0.836301765 |
| Pola2     | 11 | 0.445842673 | 0.293880024 | -0.151962649 | 0.69964692 | 0.83658889  |
| Vdac3     | 60 | 1.171532118 | 1.190265653 | 0.018733535  | 0.69978645 | 0.836687554 |
| Gna12     | 80 | 1.034013204 | 0.941834788 | -0.092178416 | 0.69990134 | 0.836756741 |
| Srp54a    | 5  | 0.779220779 | 0.842105263 | 0.062884484  | 0.70006418 | 0.83688324  |
| Gm4925    | 6  | 1.572327044 | 0.501289515 | -1.071037529 | 0.70021719 | 0.836997973 |
| Orc1      | 30 | 0.911100101 | 1.02244715  | 0.11134705   | 0.70045407 | 0.837110494 |
| Ankib1    | 35 | 0.815513126 | 0.734817339 | -0.080695787 | 0.70048162 | 0.837110494 |
| Hsd12     | 37 | 1.38102995  | 1.179765471 | -0.201264479 | 0.70048247 | 0.837110494 |
| Dbndd1    | 43 | 2.844105223 | 3.33478494  | 0.490679717  | 0.70055699 | 0.837125695 |
| Narfl     | 28 | 1.229130075 | 1.214204835 | -0.01492524  | 0.70060929 | 0.837125695 |
| Ttc33     | 19 | 1.427700415 | 1.548451122 | 0.120750707  | 0.70108064 | 0.837552492 |
| Pacrg     | 6  | 0.151515152 | 0.253518411 | 0.10200326   | 0.70105247 | 0.837552492 |
| Trip12    | 47 | 1.533353048 | 1.842919359 | 0.309566311  | 0.7011532  | 0.83757099  |
| Thoc1     | 41 | 1.227119224 | 1.064432149 | -0.162687074 | 0.70134676 | 0.837597652 |
| Spata5    | 52 | 1.161528778 | 1.043677838 | -0.117850941 | 0.70129762 | 0.837597652 |
| Mark3     | 52 | 1.142613504 | 0.991053015 | -0.151560489 | 0.70133776 | 0.837597652 |
| 30052E02F | 69 | 2.884149779 | 2.378724361 | -0.505425419 | 0.70140749 | 0.83760201  |
| Alkbh2    | 19 | 1.040395358 | 0.893633117 | -0.14676224  | 0.70172096 | 0.837635519 |
| Megf11    | 52 | 10.68769337 | 10.63134884 | -0.056344523 | 0.7016179  | 0.837635519 |
| Dusp6     | 21 | 2.173119768 | 1.843706899 | -0.329412869 | 0.70153627 | 0.837635519 |
| Malsu1    | 35 | 0.863947927 | 0.919021222 | 0.055073294  | 0.7016789  | 0.837635519 |
| Rpia      | 49 | 2.577997533 | 2.819809261 | 0.241811728  | 0.70171311 | 0.837635519 |
| Cdk5      | 17 | 1.318806104 | 1.369446063 | 0.05063996   | 0.70182761 | 0.83769468  |
| Hist2h2be | 8  | 1.442241382 | 1.761732245 | 0.319490863  | 0.70190751 | 0.837721904 |
| Zfp414    | 8  | 2.672329499 | 1.756266813 | -0.916062686 | 0.70206409 | 0.837840636 |
| Arhgef37  | 21 | 2.419317677 | 1.983646661 | -0.435671016 | 0.70217981 | 0.837910596 |
| Sufu      | 38 | 1.046143288 | 1.003856869 | -0.042286419 | 0.70232019 | 0.837934067 |
| Supt3     | 46 | 1.318599841 | 0.980065335 | -0.338534506 | 0.70237079 | 0.837934067 |
| Abcc10    | 7  | 1.389940194 | 2.607585002 | 1.217644809  | 0.70230738 | 0.837934067 |
| Lrp11     | 50 | 1.315814622 | 1.372164746 | 0.056350124  | 0.70279613 | 0.83830519  |

|          |     |             |             |              |            |             |
|----------|-----|-------------|-------------|--------------|------------|-------------|
| AI987944 | 2   | 2.58096334  | 3.086419753 | 0.505456413  | 0.70274413 | 0.83830519  |
| Gar1     | 28  | 1.425639281 | 1.358010171 | -0.06762911  | 0.70285476 | 0.838306983 |
| Ccdc43   | 34  | 1.649189413 | 1.64378881  | -0.005400603 | 0.70303806 | 0.838457455 |
| Ufl1     | 36  | 1.547472472 | 1.373945259 | -0.173527213 | 0.70333166 | 0.838517957 |
| Tmem45b  | 13  | 20.50405917 | 21.0375737  | 0.533514531  | 0.7033165  | 0.838517957 |
| Nde1     | 35  | 1.199420191 | 1.140154548 | -0.059265643 | 0.70323343 | 0.838517957 |
| Blcap    | 28  | 1.417164998 | 1.579144726 | 0.161979728  | 0.70343165 | 0.838517957 |
| Rbm39    | 25  | 1.232214376 | 1.02946063  | -0.202753747 | 0.70340646 | 0.838517957 |
| Dnmt3a   | 220 | 6.692787486 | 7.491736345 | 0.798948859  | 0.70340077 | 0.838517957 |
| Cep104   | 54  | 1.377615431 | 1.44935416  | 0.071738729  | 0.70371048 | 0.838721055 |
| Cdc42ep4 | 28  | 1.382981013 | 1.207088067 | -0.175892946 | 0.70371634 | 0.838721055 |
| Tmem100  | 5   | 12.15545107 | 10.24543626 | -1.910014812 | 0.70382692 | 0.838784721 |
| Itm2b    | 65  | 1.441448786 | 1.185377445 | -0.256071341 | 0.70398704 | 0.83890741  |
| Esco2    | 21  | 1.328587982 | 1.137862636 | -0.190725346 | 0.70419191 | 0.839083396 |
| Gm15772  | 32  | 1.113001143 | 1.179148884 | 0.066147742  | 0.70436809 | 0.839225177 |
| Cdk5r2   | 71  | 11.01623421 | 12.19092537 | 1.174691158  | 0.70448868 | 0.839300711 |
| Ppp3cb   | 23  | 1.98491296  | 1.386767888 | -0.598145072 | 0.70470181 | 0.839486469 |
| Dnajc1   | 43  | 1.244219139 | 1.190023815 | -0.054195324 | 0.70479725 | 0.839532011 |
| Tfb1m    | 11  | 0.786784995 | 0.645940962 | -0.140844033 | 0.70488515 | 0.839568558 |
| Mpp2     | 13  | 3.993033819 | 3.398828212 | -0.594205607 | 0.7053059  | 0.840001529 |
| Idnk     | 16  | 3.66267667  | 2.970031488 | -0.692645182 | 0.70559348 | 0.840275824 |
| Hn1      | 30  | 1.276297667 | 1.295734155 | 0.019436488  | 0.70575567 | 0.840400776 |
| Mir7049  | 5   | 97.2184769  | 97.15996246 | -0.058514442 | 0.70608146 | 0.840720492 |
| Pcmtd2   | 4   | 0.824175824 | 0.726982787 | -0.097193037 | 0.70625114 | 0.840807594 |
| Tnfsf8   | 1   | 62.79069767 | 60.89108911 | -1.899608566 | 0.70626921 | 0.840807594 |
| Ranbp6   | 11  | 1.391959865 | 1.664750989 | 0.272791124  | 0.70644096 | 0.840943835 |
| Men1     | 14  | 2.48951994  | 2.636453496 | 0.146933556  | 0.70674008 | 0.841095213 |
| AI429214 | 6   | 2.925998487 | 2.751055595 | -0.174942892 | 0.70673182 | 0.841095213 |
| Ppm1l    | 113 | 1.556497171 | 1.410488591 | -0.14600858  | 0.70670639 | 0.841095213 |
| Mocs1    | 10  | 1.170017245 | 1.418543154 | 0.248525909  | 0.70685936 | 0.841100728 |
| Rpl35a   | 6   | 1.217228464 | 1.105100003 | -0.112128461 | 0.70682749 | 0.841100728 |
| Sri      | 10  | 2.245570622 | 1.923604045 | -0.321966577 | 0.70694072 | 0.841129341 |
| Srp14    | 43  | 1.198485266 | 1.137915991 | -0.060569275 | 0.70714748 | 0.841307131 |
| Shoc2    | 72  | 1.808727975 | 1.613577222 | -0.195150752 | 0.70721082 | 0.84131427  |

|            |     |             |             |              |            |             |
|------------|-----|-------------|-------------|--------------|------------|-------------|
| Skp1a      | 65  | 1.202695682 | 0.980408582 | -0.2222871   | 0.70731868 | 0.841374376 |
| i00012H06F | 27  | 1.47215189  | 1.420971466 | -0.051180424 | 0.70744495 | 0.841456364 |
| Prkcg      | 2   | 12.20043573 | 10.77586207 | -1.424573661 | 0.7077364  | 0.841734794 |
| Cep95      | 26  | 1.405736149 | 1.561937331 | 0.156201182  | 0.70784863 | 0.841800052 |
| Taf4b      | 87  | 3.104151322 | 2.813557675 | -0.290593648 | 0.70810739 | 0.842039529 |
| Mapk14     | 122 | 1.293724814 | 1.157542776 | -0.136182038 | 0.70827422 | 0.842115525 |
| Fank1      | 24  | 1.39882473  | 1.298337727 | -0.100487002 | 0.70828607 | 0.842115525 |
| Golga4     | 38  | 1.622078797 | 1.398479468 | -0.223599329 | 0.70867066 | 0.842504523 |
| Ccm2       | 57  | 1.749367821 | 1.593947655 | -0.155420167 | 0.7088351  | 0.842631748 |
| Asb17      | 1   | 97.01492537 | 96.36363636 | -0.651289009 | 0.70907668 | 0.842680116 |
| 31417E11F  | 4   | 92.64705882 | 91.7677144  | -0.879344422 | 0.7091055  | 0.842680116 |
| Lamtor4    | 18  | 1.840030836 | 1.495708236 | -0.3443226   | 0.70910455 | 0.842680116 |
| Ndufc1     | 43  | 1.563077064 | 1.487194753 | -0.075882311 | 0.70898732 | 0.842680116 |
| Slc37a4    | 10  | 3.452469657 | 2.185142705 | -1.267326953 | 0.70955053 | 0.843140697 |
| Gigyf1     | 2   | 96.52406417 | 95.87589633 | -0.648167845 | 0.70976532 | 0.843327636 |
| Pkig       | 46  | 1.285734366 | 0.94843984  | -0.337294527 | 0.70990615 | 0.843358395 |
| Rps12      | 25  | 1.339108956 | 1.069712606 | -0.26939635  | 0.70987953 | 0.843358395 |
| Rora       | 172 | 7.471078758 | 7.703446387 | 0.232367629  | 0.71033107 | 0.843672914 |
| Rsph3a     | 2   | 2.85398611  | 4.057591623 | 1.203605513  | 0.71025344 | 0.843672914 |
| Chpf       | 69  | 1.308902061 | 1.184925012 | -0.123977049 | 0.71034339 | 0.843672914 |
| Rnmt1      | 30  | 0.920772334 | 0.717637926 | -0.203134408 | 0.7107667  | 0.844107367 |
| i10507B11F | 77  | 1.114204687 | 1.026913343 | -0.087291344 | 0.71083358 | 0.844118472 |
| Stx7       | 8   | 1.819125765 | 1.393954422 | -0.425171343 | 0.71091693 | 0.844149135 |
| Tmed4      | 15  | 1.031206389 | 1.001929732 | -0.029276657 | 0.71098751 | 0.844164636 |
| Ran        | 131 | 1.064778006 | 1.006188262 | -0.058589744 | 0.71141634 | 0.844317768 |
| Fbxl6      | 35  | 1.581929252 | 1.061043977 | -0.520885276 | 0.71124492 | 0.844317768 |
| Mir8116    | 6   | 2.653730542 | 2.395370455 | -0.258360087 | 0.71128703 | 0.844317768 |
| Pomgnt1    | 45  | 1.084893164 | 1.178464362 | 0.093571198  | 0.71146172 | 0.844317768 |
| Unc50      | 17  | 0.704991985 | 0.743527385 | 0.0385354    | 0.71146084 | 0.844317768 |
| Psip1      | 48  | 1.347571811 | 1.323832926 | -0.023738885 | 0.71130633 | 0.844317768 |
| Numa1      | 24  | 0.734310628 | 0.626857493 | -0.107453134 | 0.71170799 | 0.844496582 |
| Slc4a7     | 91  | 1.007449209 | 0.904494385 | -0.102954824 | 0.71172749 | 0.844496582 |
| Phf20l1    | 80  | 1.147064368 | 1.162020316 | 0.014955948  | 0.71217163 | 0.844955246 |
| M6pr       | 14  | 1.398893764 | 1.739335473 | 0.340441708  | 0.71223311 | 0.844959872 |

|            |     |             |             |              |            |             |
|------------|-----|-------------|-------------|--------------|------------|-------------|
| Prpf4      | 21  | 1.602975991 | 1.23657687  | -0.366399122 | 0.71247092 | 0.84507314  |
| Wdr13      | 5   | 22.9115821  | 23.71099037 | 0.799408269  | 0.71250136 | 0.84507314  |
| Afg3l1     | 46  | 0.787700742 | 0.854773343 | 0.067072601  | 0.71242876 | 0.84507314  |
| Gkn1       | 3   | 96.76712723 | 96.3521726  | -0.41495463  | 0.71280618 | 0.845074033 |
| Mki67      | 41  | 1.38902894  | 1.153073705 | -0.235955235 | 0.7130478  | 0.845074033 |
| Xpc        | 28  | 1.073444296 | 0.917035882 | -0.156408415 | 0.71296531 | 0.845074033 |
| Usp43      | 87  | 1.758007458 | 1.56702036  | -0.190987098 | 0.71347487 | 0.845074033 |
| 130507D05F | 24  | 1.291888586 | 1.264472024 | -0.027416562 | 0.71348114 | 0.845074033 |
| Ccdc6      | 110 | 1.355470875 | 1.321160125 | -0.03431075  | 0.71270368 | 0.845074033 |
| Pdpk1      | 47  | 1.601525392 | 1.42059413  | -0.180931263 | 0.71323851 | 0.845074033 |
| Rcan3      | 68  | 1.205105294 | 1.029232222 | -0.175873072 | 0.71267001 | 0.845074033 |
| Stt3       | 43  | 1.366759047 | 1.381371919 | 0.014612872  | 0.7126006  | 0.845074033 |
| 190007I07R | 3   | 2.498161694 | 1.995652899 | -0.502508794 | 0.7128537  | 0.845074033 |
| Engase     | 22  | 2.366299187 | 2.307717521 | -0.058581666 | 0.71344724 | 0.845074033 |
| Hpse       | 13  | 3.874990661 | 4.712262606 | 0.837271944  | 0.71339691 | 0.845074033 |
| Platr26    | 1   | 13.63636364 | 15.44715447 | 1.810790835  | 0.71325841 | 0.845074033 |
| Senp8      | 25  | 1.568753265 | 1.434984789 | -0.133768476 | 0.71287139 | 0.845074033 |
| Bard1      | 39  | 1.725914686 | 1.74222569  | 0.016311005  | 0.71303309 | 0.845074033 |
| Itgb1      | 79  | 0.917561875 | 0.952016839 | 0.034454964  | 0.71320203 | 0.845074033 |
| Rabgap1l   | 56  | 5.033881214 | 5.089484265 | 0.055603051  | 0.71312503 | 0.845074033 |
| G3bp2      | 52  | 0.758103498 | 0.944466726 | 0.186363228  | 0.71382958 | 0.845418507 |
| Trim41     | 24  | 1.651771237 | 1.825920971 | 0.174149734  | 0.71393936 | 0.845480285 |
| Entpd5     | 32  | 2.824884154 | 3.23902164  | 0.414137486  | 0.71419852 | 0.845718935 |
| Gen1       | 22  | 1.492989876 | 1.402351809 | -0.090638067 | 0.71438482 | 0.845871288 |
| Pcnxl4     | 28  | 1.648143367 | 1.304608831 | -0.343534536 | 0.71453445 | 0.845960684 |
| Dnlz       | 30  | 1.807770282 | 1.472196857 | -0.335573425 | 0.71457562 | 0.845960684 |
| .30046K22F | 30  | 1.055408826 | 1.00096251  | -0.054446315 | 0.71497818 | 0.846368976 |
| 130035B10F | 34  | 0.904965973 | 0.90872804  | 0.003762067  | 0.71509046 | 0.846433602 |
| Slc39a10   | 126 | 1.299872619 | 1.133428076 | -0.166444543 | 0.7153405  | 0.846611474 |
| Pex12      | 42  | 1.50286125  | 0.966913419 | -0.535947831 | 0.71541381 | 0.846611474 |
| Fbxl12os   | 21  | 1.541465835 | 1.262875037 | -0.278590799 | 0.71536342 | 0.846611474 |
| N4bp2l2    | 27  | 1.230135383 | 1.113307037 | -0.116828346 | 0.71551737 | 0.846665746 |
| 210408I21R | 19  | 0.915771583 | 0.979700092 | 0.063928509  | 0.71563319 | 0.846734513 |
| Rab2a      | 49  | 1.249743627 | 1.373599776 | 0.12385615   | 0.71657002 | 0.847774609 |

|            |     |             |             |              |            |             |
|------------|-----|-------------|-------------|--------------|------------|-------------|
| Oxsm       | 22  | 1.451307967 | 1.428640256 | -0.022667712 | 0.71663223 | 0.847779859 |
| C2cd2l     | 55  | 1.637696646 | 1.561596258 | -0.076100387 | 0.71677233 | 0.8478089   |
| Omp        | 8   | 95.8344925  | 96.49995467 | 0.665462172  | 0.71673071 | 0.8478089   |
| Ect2       | 3   | 1.970719322 | 2.53317938  | 0.562460057  | 0.71693481 | 0.847932728 |
| Zfp131     | 58  | 1.57115956  | 1.593407708 | 0.022248148  | 0.71703422 | 0.847945008 |
| !30114K14F | 5   | 0.942612943 | 0.625       | -0.317612943 | 0.71706076 | 0.847945008 |
| !30042O09F | 34  | 1.052086531 | 1.102951566 | 0.050865035  | 0.71718321 | 0.848009029 |
| Dhx16      | 46  | 1.310774025 | 1.306308343 | -0.004465682 | 0.71723048 | 0.848009029 |
| Fgf21      | 1   | 93.75       | 95.45454545 | 1.704545455  | 0.71754611 | 0.848313858 |
| Mydgf      | 20  | 0.530436992 | 0.884143199 | 0.353706208  | 0.71774721 | 0.848483251 |
| Ankrd13a   | 70  | 1.284582335 | 1.041298529 | -0.243283806 | 0.71814178 | 0.848742055 |
| Yap1       | 43  | 1.802963914 | 1.844247808 | 0.041283893  | 0.71818388 | 0.848742055 |
| Zc3h10     | 45  | 1.157378992 | 1.185071005 | 0.027692013  | 0.71825534 | 0.848742055 |
| Tmx1       | 10  | 1.527630494 | 1.242315039 | -0.285315455 | 0.71824941 | 0.848742055 |
| Cd47       | 89  | 1.403322777 | 1.382184433 | -0.021138345 | 0.71803068 | 0.848742055 |
| Cyba       | 19  | 1.192492939 | 1.442820199 | 0.25032726   | 0.71887222 | 0.849402608 |
| Man2a1     | 131 | 1.428324307 | 1.326657199 | -0.101667108 | 0.71906277 | 0.849559349 |
| Kti12      | 41  | 1.473729629 | 1.251494639 | -0.222234989 | 0.71917427 | 0.849622677 |
| Rhpn1      | 16  | 4.109626015 | 3.850704449 | -0.258921567 | 0.71940117 | 0.84982231  |
| Hk2        | 22  | 2.347826091 | 2.508341629 | 0.160515538  | 0.71950395 | 0.849838718 |
| Mcm9       | 25  | 1.181398027 | 1.158015341 | -0.023382686 | 0.71953089 | 0.849838718 |
| Grsf1      | 123 | 1.036695545 | 1.021848475 | -0.01484707  | 0.71962612 | 0.849882789 |
| Helz       | 62  | 1.507654226 | 1.677744545 | 0.170090319  | 0.72003341 | 0.850245988 |
| Pspc1      | 12  | 1.631383347 | 1.538990588 | -0.092392759 | 0.72004954 | 0.850245988 |
| Cdc7       | 53  | 1.175311966 | 1.093523749 | -0.081788217 | 0.72020155 | 0.850357066 |
| Kctd3      | 38  | 1.251482324 | 1.210223455 | -0.04125887  | 0.72041078 | 0.85053567  |
| Stt3b      | 70  | 1.080753147 | 0.962068868 | -0.118684279 | 0.72059537 | 0.850616718 |
| Ppil1      | 21  | 1.153891344 | 1.737653076 | 0.583761732  | 0.72053879 | 0.850616718 |
| Alg1       | 5   | 0.24691358  | 0.695652174 | 0.448738594  | 0.72146323 | 0.850693898 |
| Pigs       | 30  | 2.113573612 | 1.789280486 | -0.324293126 | 0.72127913 | 0.850693898 |
| Nek7       | 101 | 1.366335457 | 1.330550366 | -0.035785091 | 0.72157735 | 0.850693898 |
| Akap10     | 47  | 1.950481346 | 2.025670533 | 0.075189187  | 0.72129317 | 0.850693898 |
| Ctdsp1     | 74  | 2.440580082 | 2.284375802 | -0.15620428  | 0.7217031  | 0.850693898 |
| Mir1a-1    | 1   | 58.49056604 | 60.8        | 2.309433962  | 0.72141011 | 0.850693898 |

|            |     |             |             |              |            |             |
|------------|-----|-------------|-------------|--------------|------------|-------------|
| Hnrnpa3    | 31  | 0.575803933 | 0.554772039 | -0.021031894 | 0.72145387 | 0.850693898 |
| Wdr60      | 31  | 1.182525834 | 1.029175261 | -0.153350573 | 0.72088816 | 0.850693898 |
| Smarca1    | 46  | 0.96022873  | 1.042902822 | 0.082674092  | 0.72152485 | 0.850693898 |
| Moap1      | 29  | 0.839071532 | 1.461397247 | 0.622325715  | 0.72170426 | 0.850693898 |
| 10001G20F  | 26  | 1.229505898 | 1.177165065 | -0.052340833 | 0.72086448 | 0.850693898 |
| Zfp651     | 62  | 1.494657947 | 1.774781488 | 0.280123541  | 0.72135881 | 0.850693898 |
| Vps18      | 11  | 0.960893561 | 1.036531257 | 0.075637696  | 0.72113769 | 0.850693898 |
| Neurl1b    | 57  | 1.278864051 | 1.283764604 | 0.004900553  | 0.72098299 | 0.850693898 |
| Adnp       | 25  | 1.288906907 | 1.540344232 | 0.251437325  | 0.72112568 | 0.850693898 |
| Ngb        | 13  | 17.77516125 | 21.28294225 | 3.507781001  | 0.72144274 | 0.850693898 |
| Poglut1    | 43  | 1.024844622 | 1.13283833  | 0.107993707  | 0.72165268 | 0.850693898 |
| Fastkd3    | 29  | 1.142960204 | 1.268442482 | 0.125482278  | 0.7213634  | 0.850693898 |
| Cetn3      | 42  | 1.167459733 | 1.197360706 | 0.029900973  | 0.72193184 | 0.850893806 |
| Rreb1      | 148 | 1.479175728 | 1.425246427 | -0.053929301 | 0.722211   | 0.851017766 |
| Zfp804a    | 88  | 5.752363083 | 6.418355864 | 0.665992782  | 0.72210064 | 0.851017766 |
| Diras2     | 14  | 6.332658838 | 7.002903491 | 0.670244653  | 0.72220297 | 0.851017766 |
| Nsun6      | 29  | 1.657651464 | 1.567665229 | -0.089986235 | 0.722376   | 0.851143846 |
| Islr2      | 7   | 1.471819643 | 1.974726629 | 0.502906986  | 0.72253045 | 0.851257471 |
| 100014C10F | 20  | 23.96867884 | 23.82862807 | -0.140050775 | 0.72261399 | 0.851287545 |
| Dnajc25    | 54  | 0.960164261 | 0.835299145 | -0.124865117 | 0.72268789 | 0.851306261 |
| Krt42      | 10  | 89.11685956 | 88.19849886 | -0.918360692 | 0.72274899 | 0.851309894 |
| Yars       | 23  | 1.250506499 | 1.327621511 | 0.077115012  | 0.72288747 | 0.851404669 |
| Ptpn14     | 96  | 2.287518853 | 1.95162903  | -0.335889823 | 0.72300865 | 0.851479048 |
| Pdgfd      | 3   | 29.55742297 | 31.62778023 | 2.070357265  | 0.7231944  | 0.851629459 |
| Tctn1      | 18  | 1.215601125 | 1.20267274  | -0.012928385 | 0.72344413 | 0.851669838 |
| G2e3       | 37  | 1.278607017 | 1.134346709 | -0.144260308 | 0.72341136 | 0.851669838 |
| Cyb5r3     | 32  | 3.469334969 | 3.486976676 | 0.017641707  | 0.72334931 | 0.851669838 |
| 10089E03F  | 20  | 1.095604811 | 1.189912174 | 0.094307363  | 0.72346085 | 0.851669838 |
| Gins3      | 34  | 1.036737907 | 1.156289174 | 0.119551268  | 0.72374666 | 0.851732981 |
| Zyx        | 93  | 1.629070034 | 1.482894265 | -0.14617577  | 0.72374247 | 0.851732981 |
| Ccne1      | 108 | 2.360924165 | 2.368105681 | 0.007181515  | 0.72363437 | 0.851732981 |
| Izumo4     | 49  | 1.734988976 | 1.631894186 | -0.10309479  | 0.72372764 | 0.851732981 |
| Fxr1       | 140 | 1.264310028 | 1.197515076 | -0.066794952 | 0.72389846 | 0.851756086 |
| 133403F01F | 23  | 1.728986251 | 1.171669995 | -0.557316255 | 0.72394043 | 0.851756086 |

|            |     |             |             |              |            |             |
|------------|-----|-------------|-------------|--------------|------------|-------------|
| Dhrs13     | 63  | 0.907433267 | 0.90817176  | 0.000738493  | 0.72388057 | 0.851756086 |
| Setd2      | 104 | 1.386354203 | 1.337886653 | -0.048467549 | 0.72405537 | 0.851815932 |
| Coasy      | 23  | 1.497201212 | 1.250557084 | -0.246644128 | 0.7241074  | 0.851815932 |
| Efcab2     | 51  | 1.267344532 | 1.073860048 | -0.193484483 | 0.72418569 | 0.851839746 |
| Polg2      | 42  | 1.416988111 | 1.238152838 | -0.178835273 | 0.72437665 | 0.85192872  |
| Gzmn       | 1   | 83.33333333 | 80.43478261 | -2.898550725 | 0.72437745 | 0.85192872  |
| Paxip1     | 120 | 1.078645789 | 1.142308326 | 0.063662537  | 0.7244763  | 0.851976697 |
| Pld2       | 44  | 1.602019016 | 1.382429921 | -0.219589095 | 0.72456845 | 0.852016783 |
| Mir7654    | 87  | 1.088238035 | 0.887040605 | -0.20119743  | 0.7246611  | 0.85205745  |
| Ssu72      | 31  | 1.18863483  | 0.940212909 | -0.248421921 | 0.7247617  | 0.852107459 |
| Thada      | 39  | 1.296650149 | 1.471905752 | 0.175255603  | 0.72510722 | 0.852377102 |
| '00097009F | 6   | 0.649350649 | 0.701754386 | 0.052403737  | 0.72508669 | 0.852377102 |
| Phldb2     | 31  | 1.533251184 | 1.857447164 | 0.32419598   | 0.72535518 | 0.852600282 |
| Gnptab     | 90  | 1.209989059 | 1.113904555 | -0.096084504 | 0.72605368 | 0.853284612 |
| Scap       | 75  | 1.290664586 | 1.298039392 | 0.007374806  | 0.7260529  | 0.853284612 |
| Rab35      | 103 | 1.249719416 | 1.198451486 | -0.051267931 | 0.72620895 | 0.853398747 |
| Gm13363    | 38  | 0.946931598 | 0.825748447 | -0.121183151 | 0.72630301 | 0.853440929 |
| Qrsl1      | 14  | 1.356122427 | 1.665529255 | 0.309406828  | 0.72646582 | 0.853508116 |
| Senp7      | 22  | 1.02332244  | 1.113452166 | 0.090129725  | 0.72647651 | 0.853508116 |
| Jpx        | 29  | 0.84154152  | 0.982968171 | 0.14142665   | 0.72691778 | 0.853958175 |
| Rasgef1b   | 45  | 1.109403725 | 1.256751775 | 0.14734805   | 0.72717197 | 0.854188399 |
| 30563E18F  | 19  | 2.01925668  | 1.981747592 | -0.037509088 | 0.72736982 | 0.854296507 |
| Mob3a      | 43  | 1.287145666 | 1.213259141 | -0.073886524 | 0.72738044 | 0.854296507 |
| Kansl2     | 78  | 1.082286476 | 1.076148143 | -0.006138332 | 0.727615   | 0.854503607 |
| Uqcrq      | 5   | 1.630604266 | 1.927722036 | 0.297117771  | 0.72792144 | 0.854795075 |
| 30418K02F  | 18  | 1.340114254 | 1.307149541 | -0.032964713 | 0.72806905 | 0.854899998 |
| Usp42      | 130 | 1.351341904 | 1.274820206 | -0.076521698 | 0.72817582 | 0.854920186 |
| Kif3a      | 34  | 1.991331108 | 1.766552179 | -0.224778929 | 0.72820277 | 0.854920186 |
| Pdrg1      | 16  | 1.734301084 | 1.301045832 | -0.433255252 | 0.72862102 | 0.85503649  |
| Slc25a16   | 27  | 1.134660206 | 1.221332756 | 0.086672549  | 0.72864195 | 0.85503649  |
| Haus1      | 31  | 1.2236507   | 1.388554539 | 0.164903839  | 0.72850767 | 0.85503649  |
| Slc29a1    | 44  | 2.064053745 | 1.904750809 | -0.159302936 | 0.72843371 | 0.85503649  |
| Cnbp       | 29  | 0.459986377 | 0.652707419 | 0.192721041  | 0.72865145 | 0.85503649  |
| Rlim       | 18  | 18.66601221 | 19.17321235 | 0.507200145  | 0.72841544 | 0.85503649  |



|           |     |             |             |              |            |             |
|-----------|-----|-------------|-------------|--------------|------------|-------------|
| Mir7119   | 5   | 93.80981553 | 92.09557393 | -1.714241599 | 0.7288872  | 0.855194805 |
| Med7      | 25  | 0.893255916 | 1.013095305 | 0.119839389  | 0.7289612  | 0.855194805 |
| Rpl21     | 29  | 13.55195424 | 12.30278415 | -1.249170083 | 0.72892118 | 0.855194805 |
| 10474019F | 31  | 1.036346129 | 1.155160758 | 0.118814629  | 0.72929557 | 0.855517308 |
| Maff      | 81  | 1.630489388 | 1.670078879 | 0.03958949   | 0.7293527  | 0.855517308 |
| Ttk       | 23  | 1.487467028 | 1.275569609 | -0.211897419 | 0.72948898 | 0.855540384 |
| Stam2     | 39  | 1.732893015 | 1.445396039 | -0.287496976 | 0.72947397 | 0.855540384 |
| Mnt       | 48  | 1.571404222 | 1.431708171 | -0.139696051 | 0.72957932 | 0.855577956 |
| Hyal1     | 1   | 8.391608392 | 7.258064516 | -1.133543875 | 0.73096963 | 0.856301305 |
| Gle1      | 15  | 0.49738221  | 0.798386427 | 0.301004216  | 0.73088463 | 0.856301305 |
| Fndc3a    | 126 | 1.09829599  | 1.059550917 | -0.038745072 | 0.73112983 | 0.856301305 |
| Rpl14     | 53  | 1.654511503 | 1.718658593 | 0.06414709   | 0.73068777 | 0.856301305 |
| Tmem39a   | 38  | 1.469899231 | 1.421368983 | -0.048530249 | 0.73058651 | 0.856301305 |
| Srsf4     | 108 | 1.289023478 | 1.251631988 | -0.03739149  | 0.73106269 | 0.856301305 |
| Cav2      | 27  | 2.350140136 | 2.315815237 | -0.034324899 | 0.73034831 | 0.856301305 |
| Mir7077   | 7   | 90.61522531 | 86.69782297 | -3.917402341 | 0.73083174 | 0.856301305 |
| Ppan      | 32  | 1.256821477 | 1.215370303 | -0.041451174 | 0.73090691 | 0.856301305 |
| Tff1      | 1   | 93.5483871  | 92.38095238 | -1.167434716 | 0.73027681 | 0.856301305 |
| Slc38a2   | 54  | 1.190999245 | 1.153391823 | -0.037607421 | 0.73091075 | 0.856301305 |
| Car14     | 2   | 4.985431235 | 5.214044371 | 0.228613135  | 0.73108555 | 0.856301305 |
| Fam96a    | 2   | 1.004016064 | 0.727272727 | -0.276743337 | 0.73071198 | 0.856301305 |
| Gnb2      | 6   | 1.54806981  | 1.560580177 | 0.012510367  | 0.73075217 | 0.856301305 |
| Atg12     | 15  | 1.587538536 | 1.238142227 | -0.349396309 | 0.73111329 | 0.856301305 |
| Ern1      | 75  | 1.131302873 | 1.190300152 | 0.058997279  | 0.73085857 | 0.856301305 |
| Krt26     | 5   | 91.17691711 | 92.32759129 | 1.15067418   | 0.73139729 | 0.856546199 |
| Isoc1     | 49  | 1.628296449 | 1.376297007 | -0.251999441 | 0.73158744 | 0.856658517 |
| Cdc37l1   | 52  | 1.423161345 | 1.308160834 | -0.115000511 | 0.73160996 | 0.856658517 |
| Oas1b     | 9   | 3.565975761 | 3.387300236 | -0.178675525 | 0.73197615 | 0.856780255 |
| Slc32a1   | 10  | 21.22146197 | 21.50669943 | 0.285237453  | 0.73202879 | 0.856780255 |
| Mon1a     | 16  | 1.838287959 | 1.591084709 | -0.24720325  | 0.73200613 | 0.856780255 |
| Ndufv2    | 67  | 0.949624922 | 0.95757377  | 0.007948848  | 0.73198058 | 0.856780255 |
| Apoa2     | 3   | 32.42424242 | 31.3363772  | -1.087865227 | 0.73206425 | 0.856780255 |
| Cep83os   | 35  | 1.12552067  | 1.106957975 | -0.018562695 | 0.73183959 | 0.856780255 |
| Spryd7    | 34  | 2.544575618 | 3.594252304 | 1.049676686  | 0.73216106 | 0.856800419 |

|            |     |             |             |              |            |             |
|------------|-----|-------------|-------------|--------------|------------|-------------|
| Gmeb2      | 23  | 1.510085618 | 1.658078873 | 0.147993256  | 0.73219826 | 0.856800419 |
| Bloc1s1    | 19  | 1.218117174 | 1.235627206 | 0.017510032  | 0.7324368  | 0.856966268 |
| Bri3       | 66  | 1.417552008 | 1.402022315 | -0.015529693 | 0.73245679 | 0.856966268 |
| Tspyl4     | 5   | 0.19047619  | 0.434782609 | 0.244306418  | 0.73266158 | 0.857000876 |
| Snx3       | 66  | 1.038246707 | 0.909751128 | -0.128495579 | 0.73258521 | 0.857000876 |
| Strip2     | 77  | 4.970492688 | 4.786681852 | -0.183810835 | 0.73264127 | 0.857000876 |
| Pask       | 47  | 1.549770926 | 1.459238245 | -0.090532681 | 0.73285819 | 0.857094209 |
| 15-Sep     | 35  | 1.118043619 | 1.090554729 | -0.02748889  | 0.73285483 | 0.857094209 |
| Kctd9      | 68  | 1.334932629 | 1.318022151 | -0.016910478 | 0.73294836 | 0.857131352 |
| Nmral1     | 6   | 4.14608569  | 3.96700383  | -0.17908186  | 0.73317743 | 0.857327209 |
| Ptgfrn     | 80  | 1.580769497 | 1.369153527 | -0.21161597  | 0.73323269 | 0.857327209 |
| Shkbp1     | 13  | 1.986990463 | 1.865659142 | -0.121331321 | 0.73353409 | 0.857554952 |
| Vdac2      | 55  | 1.724311272 | 1.317763624 | -0.406547648 | 0.73354435 | 0.857554952 |
| Rab1b      | 9   | 8.802160262 | 8.218905713 | -0.583254549 | 0.7337295  | 0.857703076 |
| l30546C10F | 4   | 89.92537313 | 89.23509414 | -0.690278992 | 0.73403559 | 0.857775353 |
| Lppos      | 60  | 1.958897101 | 1.919004258 | -0.039892843 | 0.73408361 | 0.857775353 |
| Rmnd1      | 26  | 1.535224436 | 1.569832249 | 0.034607813  | 0.73398846 | 0.857775353 |
| Mir8111    | 9   | 2.025145444 | 2.391886171 | 0.366740727  | 0.73407124 | 0.857775353 |
| Obox6      | 1   | 92.08633094 | 90.90909091 | -1.177240026 | 0.73397383 | 0.857775353 |
| Dek        | 105 | 1.366949942 | 1.279665669 | -0.087284273 | 0.73414534 | 0.857779177 |
| Fitm2      | 4   | 1.058791508 | 1.19047619  | 0.131684683  | 0.73438327 | 0.857988859 |
| Arhgef1    | 54  | 1.862570642 | 1.574221201 | -0.288349441 | 0.73458588 | 0.858157254 |
| Stxbp3     | 36  | 1.503258965 | 1.674243623 | 0.170984659  | 0.73492521 | 0.858181611 |
| Hsdl1      | 56  | 1.169171634 | 1.293754514 | 0.12458288   | 0.73495763 | 0.858181611 |
| Psd3       | 4   | 84.8407567  | 85.21535511 | 0.374598404  | 0.73467025 | 0.858181611 |
| l30040B21F | 20  | 1.897175489 | 1.320340602 | -0.576834887 | 0.73493678 | 0.858181611 |
| l30558J18R | 20  | 1.235698082 | 0.999098193 | -0.236599889 | 0.73491677 | 0.858181611 |
| Tsen2      | 12  | 1.214847814 | 1.058841471 | -0.156006343 | 0.734865   | 0.858181611 |
| Trpt1      | 20  | 1.291354442 | 1.37867053  | 0.087316088  | 0.73513907 | 0.858325162 |
| Morc2a     | 54  | 1.211653347 | 1.350455226 | 0.138801878  | 0.73600288 | 0.859265353 |
| Cmpk1      | 98  | 1.205269206 | 1.059773635 | -0.145495571 | 0.73611478 | 0.85931038  |
| Vps13b     | 78  | 1.341717934 | 1.237485526 | -0.104232409 | 0.73615857 | 0.85931038  |
| Fam207a    | 26  | 2.457996241 | 2.214345045 | -0.243651196 | 0.73628015 | 0.859383943 |
| Rapgef6    | 40  | 1.4108996   | 1.411514072 | 0.000614472  | 0.73658266 | 0.859531926 |

|           |     |             |             |              |            |             |
|-----------|-----|-------------|-------------|--------------|------------|-------------|
| Wdr46     | 48  | 1.516456195 | 1.534201067 | 0.017744872  | 0.73654888 | 0.859531926 |
| Pigo      | 12  | 1.49425863  | 1.568597568 | 0.074338938  | 0.73656351 | 0.859531926 |
| Gal3st4   | 8   | 25.9172124  | 26.75879254 | 0.841580131  | 0.73682979 | 0.859751936 |
| Ralgps1   | 57  | 1.460991529 | 1.473374532 | 0.012383003  | 0.736919   | 0.859787663 |
| Fam134c   | 49  | 1.494645614 | 1.494363674 | -0.00028194  | 0.73700813 | 0.85982329  |
| Pef1      | 11  | 1.073780021 | 1.366321486 | 0.292541465  | 0.73709433 | 0.859855492 |
| Tigd2     | 51  | 1.476859585 | 1.267214044 | -0.209645541 | 0.73732141 | 0.859983654 |
| Hacd3     | 69  | 1.385063091 | 1.191747733 | -0.193315358 | 0.73727447 | 0.859983654 |
| Golt1b    | 57  | 1.418602865 | 1.166116491 | -0.252486375 | 0.73742353 | 0.860023394 |
| Dync1li2  | 29  | 1.532834813 | 1.511655557 | -0.021179255 | 0.7374727  | 0.860023394 |
| Arl2bp    | 51  | 1.336429955 | 1.315928323 | -0.020501633 | 0.73773513 | 0.86026107  |
| Sfrp5     | 16  | 22.29829881 | 24.21101083 | 1.912712028  | 0.73794434 | 0.860436647 |
| Smc5      | 53  | 0.834114587 | 1.023555171 | 0.189440584  | 0.73846491 | 0.860770046 |
| Amdhd1    | 29  | 2.052902182 | 2.438589761 | 0.385687579  | 0.73841591 | 0.860770046 |
| Pdhb      | 25  | 1.396067567 | 1.265182533 | -0.130885034 | 0.73842936 | 0.860770046 |
| Magi3     | 76  | 1.067831745 | 0.984021208 | -0.083810536 | 0.73834303 | 0.860770046 |
| Blzf1     | 10  | 1.798621932 | 1.662332941 | -0.136288991 | 0.7386427  | 0.860908889 |
| Rbbp5     | 11  | 1.158503495 | 1.366014226 | 0.207510731  | 0.73873787 | 0.860951432 |
| Zfp318    | 99  | 1.056303184 | 0.971892959 | -0.084410225 | 0.73888835 | 0.86099005  |
| Tob1      | 91  | 1.377644107 | 1.374191199 | -0.003452908 | 0.7388635  | 0.86099005  |
| Mir423    | 33  | 1.622584199 | 1.610647502 | -0.011936697 | 0.73905645 | 0.861012337 |
| Ash2l     | 63  | 1.584005639 | 1.479556821 | -0.104448818 | 0.73908351 | 0.861012337 |
| Kif18a    | 43  | 1.540424837 | 1.454373783 | -0.086051055 | 0.73907293 | 0.861012337 |
| Ubr3      | 93  | 1.195744569 | 1.171978073 | -0.023766496 | 0.73924411 | 0.861117823 |
| Csf3r     | 3   | 26.13399085 | 26.40804514 | 0.27405429   | 0.73938903 | 0.861117823 |
| Cebpz     | 25  | 1.206592485 | 0.889969447 | -0.316623038 | 0.73931965 | 0.861117823 |
| Tubb2a    | 28  | 1.376690978 | 1.423916342 | 0.047225364  | 0.73940879 | 0.861117823 |
| Fam216a   | 38  | 1.276861085 | 1.191300779 | -0.085560306 | 0.73950629 | 0.861163032 |
| Tnfrsf13c | 7   | 5.164142263 | 5.529142256 | 0.364999994  | 0.7396882  | 0.861306511 |
| Ssbp1     | 21  | 1.583775922 | 1.335936563 | -0.247839359 | 0.74003441 | 0.86150456  |
| Mthfd2    | 38  | 1.233241019 | 1.331494084 | 0.098253065  | 0.74003286 | 0.86150456  |
| Gm10433   | 54  | 2.067265938 | 1.965775668 | -0.101490271 | 0.73997044 | 0.86150456  |
| Jarid2    | 110 | 1.20435271  | 1.231875621 | 0.027522911  | 0.74013716 | 0.86155582  |
| Ikbke     | 1   | 37.95620438 | 40          | 2.04379562   | 0.74033094 | 0.861713029 |

|            |     |             |             |              |            |             |
|------------|-----|-------------|-------------|--------------|------------|-------------|
| Ticam1     | 6   | 2.797582089 | 2.173893513 | -0.623688576 | 0.74042776 | 0.861757371 |
| Mettl23    | 11  | 0.840292416 | 0.952830099 | 0.112537682  | 0.74077274 | 0.862090511 |
| Ogg1       | 53  | 1.694272191 | 1.664423357 | -0.029848834 | 0.74093284 | 0.862208449 |
| Cdca2      | 50  | 0.982577209 | 1.241592453 | 0.259015244  | 0.74187853 | 0.862940904 |
| Gtf2a2     | 50  | 0.992577457 | 0.962721827 | -0.02985563  | 0.74187325 | 0.862940904 |
| Ikbip      | 29  | 1.010121582 | 1.07755399  | 0.067432408  | 0.74179078 | 0.862940904 |
| Lrtm2      | 20  | 51.39388472 | 50.68359186 | -0.710292866 | 0.74197393 | 0.862940904 |
| Prpf31     | 9   | 1.206262375 | 1.874902657 | 0.668640282  | 0.74192113 | 0.862940904 |
| Fam222b    | 12  | 1.366582645 | 1.645331931 | 0.278749285  | 0.741962   | 0.862940904 |
| Arid5b     | 5   | 1.209859792 | 0.900143366 | -0.309716426 | 0.74182042 | 0.862940904 |
| Sytl2      | 8   | 11.91538904 | 11.35005072 | -0.565338317 | 0.74207831 | 0.862993907 |
| Ces2f      | 1   | 92.98245614 | 91.81818182 | -1.164274322 | 0.7421915  | 0.863057143 |
| I30049B03F | 44  | 17.66593054 | 16.22615772 | -1.439772817 | 0.74243409 | 0.863270829 |
| Paics      | 14  | 0.56867501  | 0.589186477 | 0.020511467  | 0.74260771 | 0.863335879 |
| Nsmce4a    | 70  | 1.321122478 | 1.327386654 | 0.006264176  | 0.74256703 | 0.863335879 |
| Alcam      | 31  | 1.560423413 | 1.59002639  | 0.029602976  | 0.74274579 | 0.863428011 |
| Stil       | 15  | 0.349912323 | 0.440130165 | 0.090217843  | 0.74287247 | 0.863506863 |
| Zbtb25     | 103 | 0.890703822 | 0.867825186 | -0.022878636 | 0.7430533  | 0.863648647 |
| Abcd3      | 122 | 1.076912657 | 1.034122316 | -0.042790341 | 0.74334386 | 0.863917935 |
| Slc36a1    | 18  | 1.289483451 | 1.255786676 | -0.033696776 | 0.74341642 | 0.863933838 |
| Slc22a18   | 6   | 52.30532752 | 52.50358977 | 0.198262253  | 0.7435045  | 0.863967775 |
| Fam114a1   | 26  | 1.184523717 | 1.236119    | 0.051595283  | 0.74369327 | 0.864000679 |
| Ushbp1     | 5   | 55.48908    | 54.59154214 | -0.897537859 | 0.74370696 | 0.864000679 |
| Atp2b1     | 221 | 1.247643816 | 1.184009017 | -0.063634799 | 0.74370946 | 0.864000679 |
| Pramef8    | 10  | 1.094629009 | 1.459057293 | 0.364428284  | 0.7438786  | 0.864060365 |
| Rc3h1      | 65  | 1.070463174 | 0.956092401 | -0.114370773 | 0.74384472 | 0.864060365 |
| I10127L17F | 27  | 14.16139262 | 13.23649141 | -0.924901213 | 0.74401168 | 0.864078152 |
| Dhx36      | 56  | 1.586111768 | 1.475235605 | -0.110876163 | 0.74396077 | 0.864078152 |
| Nipal1     | 9   | 2.191740157 | 2.180928548 | -0.010811609 | 0.74414132 | 0.864124963 |
| F2r        | 28  | 1.209907931 | 1.111137535 | -0.098770396 | 0.74416977 | 0.864124963 |
| Parp6      | 59  | 1.184683187 | 1.157214171 | -0.027469016 | 0.74437557 | 0.864295548 |
| Zfp560     | 20  | 1.171105505 | 1.338789485 | 0.16768398   | 0.74481637 | 0.864716851 |
| Paxbp1     | 49  | 1.120125712 | 1.162819567 | 0.042693855  | 0.74485628 | 0.864716851 |
| Kazald1    | 16  | 3.017557387 | 3.067114361 | 0.049556974  | 0.74525004 | 0.865037107 |

|          |     |             |             |              |            |             |
|----------|-----|-------------|-------------|--------------|------------|-------------|
| Hars     | 11  | 1.280590787 | 0.867144041 | -0.413446746 | 0.74519146 | 0.865037107 |
| Xrn2     | 63  | 1.167180626 | 1.262456512 | 0.095275886  | 0.74540873 | 0.865084447 |
| Afap111  | 22  | 5.201220034 | 5.165588596 | -0.035631438 | 0.74540138 | 0.865084447 |
| Cept1    | 7   | 0.432900433 | 0.235478807 | -0.197421626 | 0.74547459 | 0.865092463 |
| Fam214a  | 70  | 2.563773696 | 2.556116241 | -0.007657455 | 0.74558419 | 0.865151221 |
| Ttc3     | 39  | 1.004807407 | 1.229235932 | 0.224428525  | 0.7457383  | 0.865193214 |
| Ndc1     | 29  | 1.498279746 | 1.369657782 | -0.128621964 | 0.74571426 | 0.865193214 |
| Vps4a    | 76  | 1.562850668 | 1.248144882 | -0.314705786 | 0.74596615 | 0.865320734 |
| Ahr      | 59  | 0.894526736 | 0.904370842 | 0.009844107  | 0.74593802 | 0.865320734 |
| Tbc1d10b | 121 | 1.394790028 | 1.339900812 | -0.054889216 | 0.74615788 | 0.86547472  |
| Smc6     | 59  | 1.393334446 | 1.375071112 | -0.018263334 | 0.74631858 | 0.865524287 |
| Ezh2     | 61  | 1.235456075 | 1.142133405 | -0.09332267  | 0.74630783 | 0.865524287 |
| Tfip11   | 49  | 1.234753383 | 1.223439047 | -0.011314337 | 0.74666335 | 0.865650469 |
| Nvl      | 16  | 1.083218726 | 1.535181069 | 0.451962343  | 0.74651682 | 0.865650469 |
| Rps27l   | 57  | 1.314800587 | 1.2431694   | -0.071631186 | 0.74657332 | 0.865650469 |
| Gpatch11 | 17  | 0.712673435 | 0.603091023 | -0.109582412 | 0.74662348 | 0.865650469 |
| Oxsr1    | 98  | 1.006969561 | 1.070017126 | 0.063047566  | 0.74688235 | 0.865699184 |
| Alx1     | 19  | 44.52043507 | 44.2086274  | -0.311807673 | 0.74680142 | 0.865699184 |
| Emc2     | 45  | 1.575170673 | 1.415879362 | -0.159291311 | 0.74686258 | 0.865699184 |
| Zfp935   | 3   | 1.22574692  | 2.43902439  | 1.21327747   | 0.74729294 | 0.866062867 |
| Zc3h6    | 65  | 1.29857208  | 1.091535554 | -0.207036526 | 0.74731416 | 0.866062867 |
| Nol7     | 43  | 3.338984566 | 3.247383036 | -0.091601531 | 0.74743915 | 0.86613931  |
| Clta     | 32  | 0.86992803  | 0.900086639 | 0.03015861   | 0.74768135 | 0.866283154 |
| Rarres1  | 43  | 17.96243147 | 18.87029618 | 0.907864713  | 0.74764207 | 0.866283154 |
| Acad10   | 18  | 1.128220798 | 1.313647629 | 0.185426831  | 0.74776805 | 0.866315206 |
| Gsk3a    | 58  | 1.242626552 | 1.192561547 | -0.050065005 | 0.74812131 | 0.866656039 |
| Kctd16   | 3   | 73.74345848 | 72.77866213 | -0.96479635  | 0.74825782 | 0.866745758 |
| Trmt1    | 18  | 1.917183622 | 1.41305806  | -0.504125562 | 0.74861298 | 0.866981246 |
| Phf12    | 79  | 1.519223468 | 1.605310308 | 0.08608684   | 0.74853656 | 0.866981246 |
| Rnpc3    | 45  | 0.901559832 | 0.989814133 | 0.088254301  | 0.74863837 | 0.866981246 |
| Wdr45b   | 47  | 1.193815878 | 1.220828309 | 0.027012431  | 0.74883437 | 0.867074065 |
| Myo1b    | 71  | 1.164497462 | 1.123042129 | -0.041455332 | 0.74883669 | 0.867074065 |
| Btbd2    | 3   | 9.372043011 | 9.343773304 | -0.028269707 | 0.74899693 | 0.86717072  |
| Mitf     | 22  | 1.932098633 | 2.147557133 | 0.2154585    | 0.74903836 | 0.86717072  |

|            |     |             |             |              |            |             |
|------------|-----|-------------|-------------|--------------|------------|-------------|
| Zfand4     | 74  | 1.940722173 | 1.473327993 | -0.46739418  | 0.74928092 | 0.867383098 |
| Mrps28     | 33  | 1.437459603 | 1.299810488 | -0.137649115 | 0.74936747 | 0.867414863 |
| Ap5s1      | 13  | 0.75926651  | 0.626218184 | -0.133048326 | 0.74951212 | 0.86744545  |
| Pnkp       | 15  | 2.222594365 | 2.165636043 | -0.056958322 | 0.74947669 | 0.86744545  |
| Smurf1     | 90  | 1.024149048 | 1.024239181 | 9.01E-05     | 0.74987326 | 0.867794967 |
| Hint2      | 23  | 2.326248123 | 1.960254232 | -0.365993891 | 0.75005476 | 0.867868127 |
| Chn2       | 78  | 2.587675999 | 2.541242089 | -0.04643391  | 0.75003734 | 0.867868127 |
| !30056P14F | 6   | 1.782614087 | 1.039237881 | -0.743376206 | 0.7502109  | 0.867980351 |
| Kctd18     | 55  | 1.738489696 | 1.231782495 | -0.506707201 | 0.75033608 | 0.868056739 |
| Nt5e       | 28  | 2.643040751 | 2.85629739  | 0.213256638  | 0.7503953  | 0.868056812 |
| Khdrbs1    | 83  | 0.840841715 | 0.997498644 | 0.156656929  | 0.75059017 | 0.868190475 |
| Hadhb      | 2   | 1.951219512 | 1.573426573 | -0.377792939 | 0.75062918 | 0.868190475 |
| Cspp1      | 8   | 1.774361707 | 1.849035583 | 0.074673876  | 0.75100325 | 0.868349357 |
| Ankrd9     | 121 | 0.984187893 | 1.130667983 | 0.146480089  | 0.75091576 | 0.868349357 |
| Fam53c     | 4   | 0.871718895 | 1           | 0.128281105  | 0.75098357 | 0.868349357 |
| Hspb11     | 35  | 1.477308    | 1.554433537 | 0.077125537  | 0.75098093 | 0.868349357 |
| Rbm6       | 31  | 1.376481448 | 1.611512225 | 0.235030777  | 0.75107469 | 0.868363538 |
| Zeb2os     | 7   | 10.3880119  | 9.920634921 | -0.467376976 | 0.75151567 | 0.868804927 |
| Rps7       | 41  | 2.383419779 | 2.447707303 | 0.064287523  | 0.7517524  | 0.868914811 |
| 500012F01F | 80  | 1.427578824 | 1.371632539 | -0.055946285 | 0.75184758 | 0.868914811 |
| Cul1       | 161 | 1.182016993 | 1.099399817 | -0.082617176 | 0.75182184 | 0.868914811 |
| Arv1       | 28  | 1.483165099 | 1.328917231 | -0.154247868 | 0.75181602 | 0.868914811 |
| Fam117a    | 39  | 2.382740054 | 2.019131329 | -0.363608725 | 0.75200337 | 0.869026416 |
| Ppig       | 52  | 1.208527876 | 1.245636035 | 0.037108158  | 0.75221607 | 0.86913532  |
| Mrpl46     | 16  | 1.514308921 | 1.564640128 | 0.050331207  | 0.75215709 | 0.86913532  |
| Nubp1      | 22  | 1.143983855 | 1.374585058 | 0.230601203  | 0.75229316 | 0.869155953 |
| Cox17      | 17  | 1.535534046 | 1.615426776 | 0.07989273   | 0.752702   | 0.869559847 |
| Cgnl1      | 26  | 1.941593447 | 1.906512012 | -0.035081435 | 0.75282778 | 0.869636686 |
| Dynlrb2    | 3   | 5.97912191  | 7.096576482 | 1.117454572  | 0.75330391 | 0.870058933 |
| Arl10      | 36  | 0.856381808 | 0.730550368 | -0.12583144  | 0.75331189 | 0.870058933 |
| Tesk1      | 13  | 1.613173203 | 1.235446864 | -0.377726339 | 0.75379102 | 0.870302491 |
| 110107G23F | 28  | 1.423061969 | 1.248941569 | -0.1741204   | 0.75377646 | 0.870302491 |
| Nr2c2      | 120 | 1.171638938 | 1.198049276 | 0.026410338  | 0.75368598 | 0.870302491 |
| Mettl21a   | 32  | 1.205075513 | 1.317768518 | 0.112693005  | 0.75378354 | 0.870302491 |

|            |     |             |             |              |            |             |
|------------|-----|-------------|-------------|--------------|------------|-------------|
| Dzip3      | 2   | 2.318005262 | 2.683217952 | 0.365212689  | 0.75381932 | 0.870302491 |
| Yaf2       | 154 | 1.013614326 | 1.00790102  | -0.005713306 | 0.75407321 | 0.870321719 |
| Nme2       | 45  | 1.214860742 | 1.305314948 | 0.090454206  | 0.75397855 | 0.870321719 |
| Nmnat1     | 35  | 1.416177794 | 1.259324751 | -0.156853043 | 0.75402515 | 0.870321719 |
| .30307A14F | 47  | 1.400757047 | 1.391218657 | -0.009538389 | 0.75390402 | 0.870321719 |
| Sec31a     | 51  | 1.130922913 | 1.0552773   | -0.075645612 | 0.75414909 | 0.870340843 |
| Tada2b     | 113 | 1.206778811 | 1.144644652 | -0.062134158 | 0.75427018 | 0.870412125 |
| Ublcp1     | 45  | 1.576315568 | 1.3615698   | -0.214745768 | 0.75459061 | 0.870713421 |
| Eif4h      | 80  | 1.001185447 | 1.077431921 | 0.076246474  | 0.7549573  | 0.871068044 |
| Nfatc3     | 71  | 1.187425713 | 1.050510786 | -0.136914927 | 0.75502268 | 0.871074989 |
| Syt4       | 2   | 22.44682036 | 23.1298753  | 0.683054938  | 0.75518653 | 0.871195524 |
| Fbxo32     | 39  | 1.535984771 | 1.858580938 | 0.322596167  | 0.75542147 | 0.871279301 |
| Nutf2-ps1  | 35  | 1.180131424 | 1.156797009 | -0.023334416 | 0.75536165 | 0.871279301 |
| Arl16      | 15  | 1.347334679 | 1.145225575 | -0.202109105 | 0.75543727 | 0.871279301 |
| Gnl1       | 53  | 1.30997952  | 1.181563019 | -0.128416501 | 0.75561289 | 0.871413359 |
| Il3ra      | 26  | 1.85232389  | 1.692163773 | -0.160160116 | 0.75581915 | 0.87158273  |
| Ext1       | 95  | 1.016455255 | 0.98641367  | -0.030041585 | 0.75601089 | 0.871715134 |
| 30020D12F  | 6   | 61.80385898 | 62.12454789 | 0.320688909  | 0.75605278 | 0.871715134 |
| Mbd6       | 18  | 1.092582864 | 1.275056716 | 0.182473851  | 0.7561872  | 0.871801618 |
| Hist4h4    | 13  | 0.359480977 | 0.372036432 | 0.012555455  | 0.75637133 | 0.871834375 |
| Rin3       | 57  | 1.454100601 | 1.380129363 | -0.073971238 | 0.75644742 | 0.871834375 |
| Cerkl      | 30  | 35.64458705 | 36.4880682  | 0.843481148  | 0.75644044 | 0.871834375 |
| Rps3a1     | 29  | 0.800270264 | 0.929603645 | 0.12933338   | 0.75645327 | 0.871834375 |
| Cinp       | 7   | 2.242905629 | 1.625545271 | -0.617360359 | 0.75672633 | 0.87187517  |
| Strip1     | 26  | 1.505022876 | 1.434113107 | -0.070909769 | 0.75668115 | 0.87187517  |
| Yipf4      | 39  | 1.521020972 | 1.087757484 | -0.433263488 | 0.75671619 | 0.87187517  |
| Denr       | 76  | 1.517689655 | 1.359526795 | -0.158162861 | 0.75665577 | 0.87187517  |
| Zfc3h1     | 60  | 1.331390643 | 1.199892835 | -0.131497807 | 0.75680731 | 0.871900019 |
| Pcdhga3    | 10  | 69.41033895 | 68.07462965 | -1.335709299 | 0.75696981 | 0.872018758 |
| Psmc7      | 49  | 1.190313034 | 1.274736638 | 0.084423604  | 0.75719471 | 0.872209371 |
| Dhx9       | 38  | 0.845967642 | 0.713170721 | -0.13279692  | 0.75775258 | 0.872646473 |
| Ypel2      | 48  | 1.204163715 | 0.940269904 | -0.263893812 | 0.75771556 | 0.872646473 |
| Gm1661     | 7   | 0.71942446  | 0.6814562   | -0.03796826  | 0.75765401 | 0.872646473 |
| Mrfap1     | 27  | 0.462789411 | 0.412173886 | -0.050615525 | 0.75795046 | 0.87280586  |

|            |     |             |             |              |            |             |
|------------|-----|-------------|-------------|--------------|------------|-------------|
| 30015E06F  | 103 | 1.24973765  | 1.120201927 | -0.129535723 | 0.7585788  | 0.873198848 |
| Mir1936    | 7   | 77.55386264 | 77.82978545 | 0.27592281   | 0.75843165 | 0.873198848 |
| Reps1      | 106 | 1.345321979 | 1.394709741 | 0.049387762  | 0.75854436 | 0.873198848 |
| Slc25a46   | 65  | 0.986764581 | 1.002957621 | 0.01619304   | 0.75868065 | 0.873198848 |
| Fez2       | 57  | 1.372497634 | 1.479371351 | 0.106873717  | 0.75859002 | 0.873198848 |
| Tmem258    | 7   | 14.02962545 | 14.21078606 | 0.181160614  | 0.75870828 | 0.873198848 |
| Nin        | 130 | 1.896168332 | 1.881383552 | -0.014784781 | 0.75851093 | 0.873198848 |
| Ppcdc      | 14  | 1.346688539 | 1.360954278 | 0.014265739  | 0.75903885 | 0.873510786 |
| Gnl2       | 42  | 1.038816024 | 0.906322993 | -0.132493031 | 0.75926654 | 0.873602291 |
| Zfp1       | 14  | 0.871632908 | 0.775323653 | -0.096309255 | 0.75929696 | 0.873602291 |
| Casp3      | 24  | 1.974869498 | 1.673548667 | -0.301320831 | 0.75923725 | 0.873602291 |
| Xpo1       | 36  | 1.438193983 | 1.45123317  | 0.013039187  | 0.75986975 | 0.874192767 |
| Fcho2      | 59  | 1.320580836 | 1.187028658 | -0.133552179 | 0.75999664 | 0.874201671 |
| Vezt       | 9   | 1.04912138  | 1.4193745   | 0.370253121  | 0.75994317 | 0.874201671 |
| Nckipsd    | 46  | 1.148641611 | 0.904249397 | -0.244392213 | 0.76026293 | 0.874439433 |
| Mon2       | 70  | 1.331157114 | 1.26369177  | -0.067465345 | 0.76042263 | 0.874554565 |
| Zfp637     | 53  | 1.40716248  | 1.252822046 | -0.154340433 | 0.76052474 | 0.874603445 |
| Akr7a5     | 37  | 1.361279714 | 1.393647663 | 0.032367949  | 0.76088871 | 0.874751315 |
| Aak1       | 51  | 1.394447544 | 1.30939695  | -0.085050594 | 0.76071351 | 0.874751315 |
| Baz2b      | 31  | 1.59902047  | 1.127850251 | -0.471170218 | 0.76089112 | 0.874751315 |
| Fyco1      | 29  | 1.258716346 | 1.14175951  | -0.116956835 | 0.76089177 | 0.874751315 |
| Ankrd52    | 99  | 0.971273704 | 0.867297346 | -0.103976358 | 0.76098443 | 0.874789308 |
| Cntd1      | 2   | 1.694915254 | 2.201257862 | 0.506342607  | 0.76109781 | 0.874791869 |
| Ccdc171    | 63  | 0.812031352 | 0.89780777  | 0.085776418  | 0.76110589 | 0.874791869 |
| '00065D16F | 67  | 0.918482986 | 0.857910336 | -0.06057265  | 0.76196849 | 0.875714731 |
| Vamp4      | 19  | 1.410144294 | 1.61053636  | 0.200392066  | 0.7622924  | 0.87601838  |
| P3h1       | 45  | 1.054654026 | 1.119303719 | 0.064649693  | 0.76273848 | 0.876137023 |
| Cast       | 15  | 1.488845772 | 1.137871144 | -0.350974628 | 0.76250939 | 0.876137023 |
| Calm1      | 17  | 1.253424215 | 1.327025627 | 0.073601412  | 0.76266857 | 0.876137023 |
| Neo1       | 175 | 1.317089747 | 1.217831222 | -0.099258524 | 0.76267768 | 0.876137023 |
| Herc2      | 35  | 1.514194404 | 1.306408994 | -0.20778541  | 0.76271833 | 0.876137023 |
| Mtx2       | 32  | 0.805031501 | 0.82511623  | 0.020084729  | 0.76275388 | 0.876137023 |
| Nus1       | 61  | 1.354528513 | 1.240629556 | -0.113898957 | 0.76296067 | 0.876305956 |
| Utp15      | 26  | 1.014499115 | 0.910295721 | -0.104203394 | 0.76305331 | 0.876343763 |



|          |     |             |             |              |            |             |
|----------|-----|-------------|-------------|--------------|------------|-------------|
| Trib3    | 8   | 1.489386143 | 1.278167641 | -0.211218502 | 0.7631616  | 0.876399538 |
| Rps13    | 14  | 1.264750455 | 1.168693786 | -0.096056668 | 0.76330205 | 0.876492233 |
| Ccnk     | 33  | 1.056878581 | 0.949805707 | -0.107072875 | 0.76350085 | 0.876651912 |
| Nomo1    | 42  | 0.949084496 | 0.812343508 | -0.136740988 | 0.76368153 | 0.876790766 |
| Ino80dos | 16  | 0.810921643 | 0.677620772 | -0.133300871 | 0.76399636 | 0.876980733 |
| Tas1r1   | 11  | 0.981328613 | 0.731905628 | -0.249422985 | 0.76398208 | 0.876980733 |
| Snx13    | 85  | 1.123272338 | 1.149341581 | 0.026069243  | 0.76402628 | 0.876980733 |
| Ezh1     | 39  | 1.475058308 | 1.599972371 | 0.124914063  | 0.76444334 | 0.877390819 |
| Cox15    | 29  | 1.230830857 | 1.084696796 | -0.146134062 | 0.76476048 | 0.877548891 |
| 7-Sep    | 68  | 1.409197714 | 1.304883171 | -0.104314543 | 0.76471492 | 0.877548891 |
| Uqcrc2   | 25  | 1.331107908 | 1.510972859 | 0.179864952  | 0.7647422  | 0.877548891 |
| Apc2     | 3   | 66.65212333 | 69.42719117 | 2.775067839  | 0.76513614 | 0.87791131  |
| Pitpna   | 56  | 1.425890576 | 1.442433704 | 0.016543127  | 0.76537148 | 0.878112674 |
| Prkdc    | 30  | 1.439159714 | 1.467974417 | 0.028814702  | 0.76548377 | 0.878172838 |
| Mpi      | 5   | 1.09409716  | 1.344028071 | 0.249930911  | 0.76572944 | 0.87818316  |
| Rad54b   | 35  | 0.884720056 | 1.040544896 | 0.15582484   | 0.76579164 | 0.87818316  |
| Rdh13    | 19  | 1.374348196 | 1.525145774 | 0.150797578  | 0.76579199 | 0.87818316  |
| Mpp6     | 113 | 1.315147694 | 1.283480772 | -0.031666922 | 0.7657351  | 0.87818316  |
| Hsf2bp   | 7   | 97.24919198 | 97.7414025  | 0.492210516  | 0.76558968 | 0.87818316  |
| Map2k1   | 43  | 1.182790838 | 1.056958272 | -0.125832565 | 0.76610124 | 0.878331864 |
| Acot4    | 5   | 8.001769495 | 8.262186048 | 0.260416553  | 0.76608524 | 0.878331864 |
| Agl      | 49  | 1.644113116 | 1.646184018 | 0.002070902  | 0.76606829 | 0.878331864 |
| Cnppd1   | 22  | 0.930414846 | 0.869178595 | -0.061236251 | 0.76617046 | 0.878342603 |
| Mad2l2   | 31  | 2.78723656  | 2.710944006 | -0.076292555 | 0.76637044 | 0.878434611 |
| Eef1e1   | 37  | 3.649717181 | 3.645356011 | -0.00436117  | 0.76632718 | 0.878434611 |
| Ppp1r12a | 106 | 1.664197023 | 1.572640003 | -0.091557019 | 0.76645196 | 0.878459424 |
| Mars2    | 116 | 1.216659287 | 1.187519474 | -0.029139813 | 0.76656565 | 0.878521113 |
| Papolg   | 24  | 1.756471755 | 1.57307226  | -0.183399495 | 0.76688896 | 0.878823002 |
| Vwc2l    | 1   | 67.33333333 | 65.67164179 | -1.661691542 | 0.76705342 | 0.878874199 |
| Samd5    | 60  | 1.255756511 | 1.270901091 | 0.01514458   | 0.76700606 | 0.878874199 |
| Wdr19    | 13  | 4.483575081 | 4.529357615 | 0.045782534  | 0.7672494  | 0.879030114 |
| Bcl7b    | 45  | 1.330047432 | 1.421983474 | 0.091936042  | 0.76749181 | 0.879185537 |
| Ggps1    | 28  | 1.936038185 | 2.093227898 | 0.157189713  | 0.76750489 | 0.879185537 |
| Cdbl     | 12  | 27.94150718 | 27.7251748  | -0.216332376 | 0.76789264 | 0.879372318 |

|           |     |             |             |              |            |             |
|-----------|-----|-------------|-------------|--------------|------------|-------------|
| Zc2hc1a   | 42  | 0.996635932 | 0.96020326  | -0.036432672 | 0.76785245 | 0.879372318 |
| Abhd8     | 36  | 1.521129228 | 1.65386076  | 0.132731532  | 0.76780204 | 0.879372318 |
| Ahctf1    | 46  | 1.128769161 | 1.034470398 | -0.094298764 | 0.76790765 | 0.879372318 |
| Gm5113    | 3   | 0.966183575 | 0.529100529 | -0.437083046 | 0.76810232 | 0.879526603 |
| Rad1      | 12  | 2.038979398 | 1.401268176 | -0.637711222 | 0.76817983 | 0.879546726 |
| Kif13b    | 27  | 1.732834825 | 1.804239861 | 0.071405036  | 0.76847789 | 0.879819351 |
| 10009A15F | 8   | 0.608333534 | 0.75248087  | 0.144147337  | 0.76909757 | 0.880196132 |
| Rab3gap1  | 3   | 1.981949674 | 3.08432702  | 1.102377346  | 0.76888159 | 0.880196132 |
| Abcc5     | 57  | 1.537700901 | 1.548664214 | 0.010963312  | 0.76897186 | 0.880196132 |
| Ficd      | 53  | 2.416715222 | 2.166900794 | -0.249814427 | 0.76908676 | 0.880196132 |
| Megf8     | 23  | 1.573264101 | 1.381273425 | -0.191990676 | 0.76918018 | 0.880196132 |
| Zcchc2    | 92  | 1.104037121 | 0.882032389 | -0.222004732 | 0.76918952 | 0.880196132 |
| Sos2      | 135 | 1.227011396 | 1.228618501 | 0.001607105  | 0.76922688 | 0.880196132 |
| Casp6     | 25  | 1.182768465 | 1.347895884 | 0.165127419  | 0.76954273 | 0.880488886 |
| Snx33     | 14  | 1.541041099 | 1.531306983 | -0.009734117 | 0.76987971 | 0.880805775 |
| Tnrc6a    | 27  | 1.47422927  | 1.122071131 | -0.352158139 | 0.77053365 | 0.881485215 |
| Rab22a    | 36  | 1.756358594 | 1.672374734 | -0.08398386  | 0.77081898 | 0.881685103 |
| Slc25a36  | 38  | 1.912418597 | 1.890833739 | -0.021584858 | 0.77088864 | 0.881685103 |
| Trio      | 121 | 1.303834828 | 1.096193436 | -0.207641392 | 0.77086777 | 0.881685103 |
| Tomm6os   | 30  | 1.19547166  | 1.433474271 | 0.238002611  | 0.77144886 | 0.882162985 |
| Ccdc71l   | 72  | 1.103869587 | 1.081031541 | -0.022838046 | 0.7714479  | 0.882162985 |
| Ier3ip1   | 33  | 1.683017026 | 1.827530599 | 0.144513573  | 0.77151    | 0.882162985 |
| Rpp40     | 6   | 0.827895019 | 0.902977052 | 0.075082032  | 0.77154694 | 0.882162985 |
| Spry4     | 42  | 1.137626353 | 1.405485119 | 0.267858765  | 0.77160875 | 0.882164925 |
| Mir665    | 1   | 89.94413408 | 89.09090909 | -0.853224987 | 0.77204608 | 0.882531661 |
| Rhbf2     | 25  | 0.931056191 | 1.121691655 | 0.190635463  | 0.77204981 | 0.882531661 |
| Maged2    | 1   | 23.26732673 | 22.05128205 | -1.216044681 | 0.77231717 | 0.88267207  |
| Fau       | 4   | 0.841135575 | 0.644494474 | -0.196641101 | 0.77241732 | 0.88267207  |
| Arl4a     | 109 | 1.260076372 | 1.25168629  | -0.008390082 | 0.77241008 | 0.88267207  |
| Apbb2     | 75  | 1.221624874 | 1.269107442 | 0.047482568  | 0.77223683 | 0.88267207  |
| 30508B09F | 56  | 0.911855567 | 1.03940736  | 0.127551794  | 0.7724734  | 0.88267207  |
| Gpr68     | 18  | 16.51010166 | 16.31708206 | -0.1930196   | 0.77260961 | 0.88275897  |
| Prpsap1   | 57  | 0.969806231 | 0.89566399  | -0.074142241 | 0.77278202 | 0.882887218 |
| Phtf1os   | 36  | 1.324370353 | 1.044624317 | -0.279746036 | 0.77290461 | 0.882958529 |

|           |     |             |             |              |            |             |
|-----------|-----|-------------|-------------|--------------|------------|-------------|
| Ddx39b    | 58  | 1.36034186  | 1.186674839 | -0.173667021 | 0.77323488 | 0.883267056 |
| Tmem241   | 24  | 1.218572073 | 1.302349407 | 0.083777334  | 0.77374272 | 0.88376266  |
| Wbp1      | 34  | 1.884994152 | 1.750745188 | -0.134248964 | 0.77391694 | 0.88376266  |
| Eng       | 19  | 54.07907598 | 53.99404192 | -0.085034059 | 0.77386711 | 0.88376266  |
| Sp1       | 73  | 1.28171491  | 1.318608697 | 0.036893787  | 0.77386061 | 0.88376266  |
| Ahcy      | 27  | 0.89485177  | 0.897805774 | 0.002954004  | 0.7740301  | 0.88376266  |
| Fancg     | 7   | 1.207967417 | 1.357740332 | 0.149772915  | 0.77399768 | 0.88376266  |
| Sco1      | 28  | 1.089201804 | 1.256984193 | 0.167782389  | 0.77424744 | 0.883942032 |
| H2afj     | 10  | 0.569050321 | 0.740402509 | 0.171352188  | 0.77438608 | 0.884031536 |
| Etfa      | 35  | 1.081739076 | 0.900238428 | -0.181500648 | 0.77451909 | 0.884114593 |
| C1d       | 25  | 1.629093526 | 1.547329385 | -0.081764141 | 0.77460982 | 0.884149388 |
| Isca2     | 5   | 2.31777199  | 1.770383541 | -0.547388449 | 0.77489156 | 0.884264615 |
| Mbtd1     | 25  | 2.948151774 | 2.640220704 | -0.307931069 | 0.7748265  | 0.884264615 |
| 10015M20f | 12  | 0.400286141 | 0.41963089  | 0.019344749  | 0.77485432 | 0.884264615 |
| Agpat4    | 11  | 1.531422484 | 1.879088761 | 0.347666277  | 0.77521447 | 0.884495535 |
| Npc2      | 18  | 1.785475616 | 1.561130513 | -0.224345103 | 0.77516266 | 0.884495535 |
| Smu1      | 26  | 1.559806696 | 1.366221352 | -0.193585344 | 0.77558488 | 0.884540662 |
| Lin54     | 89  | 1.716430301 | 1.757101515 | 0.040671214  | 0.77558935 | 0.884540662 |
| Ifitm5    | 2   | 92.45336348 | 92.27642276 | -0.176940718 | 0.77555736 | 0.884540662 |
| Mtr       | 31  | 1.357921513 | 1.06111853  | -0.296802983 | 0.77546509 | 0.884540662 |
| Efcab14   | 26  | 0.700692806 | 0.742095223 | 0.041402417  | 0.7755664  | 0.884540662 |
| Pkp2      | 55  | 1.70493444  | 1.593439483 | -0.111494956 | 0.77561569 | 0.884540662 |
| lpmk      | 84  | 1.43719809  | 1.455598605 | 0.018400514  | 0.77594391 | 0.884826334 |
| Larp1b    | 132 | 0.92000308  | 0.887544369 | -0.032458711 | 0.77600401 | 0.884826334 |
| Wnt7b     | 184 | 16.59780731 | 17.68675756 | 1.088950253  | 0.77604708 | 0.884826334 |
| 33420G17F | 16  | 1.280787564 | 1.490006492 | 0.209218928  | 0.7761288  | 0.884850745 |
| Cct6a     | 35  | 1.022837728 | 1.307936787 | 0.285099059  | 0.77622679 | 0.884893715 |
| Tmco1     | 58  | 1.227282959 | 1.085340385 | -0.141942574 | 0.77661682 | 0.884925856 |
| Lamtor3   | 9   | 1.440625991 | 1.739826208 | 0.299200217  | 0.77642506 | 0.884925856 |
| Aph1a     | 14  | 1.280205683 | 1.004750826 | -0.275454857 | 0.77653303 | 0.884925856 |
| Lym7      | 6   | 1.97275668  | 3.364636212 | 1.391879531  | 0.77640609 | 0.884925856 |
| Pcgf3     | 28  | 1.176056677 | 1.125593498 | -0.050463179 | 0.77644728 | 0.884925856 |
| Gria3     | 9   | 57.45190136 | 57.07874996 | -0.373151401 | 0.77657949 | 0.884925856 |
| Tbc1d20   | 41  | 1.189317023 | 1.322406674 | 0.133089652  | 0.77690296 | 0.885180631 |

|            |     |             |             |              |            |             |
|------------|-----|-------------|-------------|--------------|------------|-------------|
| Insl6      | 16  | 1.455893513 | 1.366384087 | -0.089509426 | 0.77696106 | 0.885180631 |
| Sergef     | 36  | 1.582135883 | 1.515896761 | -0.066239122 | 0.77715803 | 0.885209713 |
| Ttll12     | 16  | 1.434918716 | 1.533629171 | 0.098710455  | 0.7771561  | 0.885209713 |
| Ccl27a     | 8   | 1.533697242 | 1.932949339 | 0.399252097  | 0.77716756 | 0.885209713 |
| Hira       | 38  | 1.441908398 | 1.487447862 | 0.045539464  | 0.77743887 | 0.885392974 |
| Gabarapl2  | 47  | 1.505988305 | 1.343199784 | -0.162788521 | 0.77744913 | 0.885392974 |
| Hsf5       | 72  | 97.4317073  | 97.40325331 | -0.028453984 | 0.77760025 | 0.885496361 |
| BC025920   | 1   | 2.542372881 | 3.191489362 | 0.64911648   | 0.77775595 | 0.885604938 |
| Ankrd16    | 10  | 2.546912028 | 2.981810003 | 0.434897975  | 0.77782415 | 0.885613872 |
| Nckap1l    | 4   | 59.20304472 | 59.7985438  | 0.59549908   | 0.77800091 | 0.885746395 |
| Dbp        | 24  | 2.047976338 | 2.141856426 | 0.093880088  | 0.77806612 | 0.885751921 |
| l30091E24F | 47  | 1.64817737  | 1.299278516 | -0.348898854 | 0.7781633  | 0.885793827 |
| Snap47     | 4   | 0.257731959 | 0.595238095 | 0.337506136  | 0.77825105 | 0.885825003 |
| Snx4       | 49  | 1.37842441  | 1.41036169  | 0.03193728   | 0.77856056 | 0.886108557 |
| 330432E09F | 6   | 39.3099772  | 39.16251011 | -0.147467095 | 0.77884013 | 0.88626048  |
| Ctps       | 56  | 1.271893645 | 1.379529401 | 0.107635755  | 0.77883789 | 0.88626048  |
| Spidr      | 31  | 1.560553627 | 1.534875878 | -0.025677749 | 0.77893563 | 0.88626048  |
| Srd5a1     | 3   | 0.548696845 | 0.529776696 | -0.018920149 | 0.77892523 | 0.88626048  |
| Supt16     | 68  | 1.18667818  | 1.113592175 | -0.073086005 | 0.7790408  | 0.886311416 |
| Mtss1      | 84  | 1.512037682 | 1.28538809  | -0.226649592 | 0.77915854 | 0.886376655 |
| Echdc1     | 10  | 1.458482548 | 1.061593121 | -0.396889427 | 0.77931126 | 0.88648166  |
| Zfp109     | 8   | 1.492912884 | 1.470866181 | -0.022046703 | 0.77966395 | 0.886676648 |
| Zc3h3      | 27  | 7.511706336 | 6.599983785 | -0.91172255  | 0.77957998 | 0.886676648 |
| Blm        | 34  | 1.23148185  | 1.216095218 | -0.015386633 | 0.77964429 | 0.886676648 |
| Mvp        | 6   | 94.88883271 | 95.35870032 | 0.469867615  | 0.77975741 | 0.886714215 |
| Slc25a24   | 15  | 2.007515932 | 1.76605672  | -0.241459212 | 0.77993058 | 0.886773692 |
| L10036E04F | 17  | 3.714299924 | 3.478111759 | -0.236188166 | 0.77990237 | 0.886773692 |
| Nrip1      | 114 | 1.255347966 | 1.189775842 | -0.065572124 | 0.78000598 | 0.886790716 |
| Glo1       | 7   | 1.932701484 | 1.8235589   | -0.109142585 | 0.78034929 | 0.887043572 |
| Zc3h15     | 63  | 1.680800886 | 1.389476844 | -0.291324041 | 0.78033142 | 0.887043572 |
| Mansc1     | 21  | 15.50325879 | 16.3899892  | 0.88673041   | 0.78042762 | 0.887063891 |
| Kif20b     | 30  | 1.239923657 | 0.983951949 | -0.255971709 | 0.78049981 | 0.887077237 |
| Urm1       | 10  | 1.647082288 | 1.231228335 | -0.415853953 | 0.78087077 | 0.88743012  |
| Dhx30      | 65  | 1.440867794 | 1.314980389 | -0.125887405 | 0.78093729 | 0.887436983 |

|            |     |             |             |              |            |             |
|------------|-----|-------------|-------------|--------------|------------|-------------|
| Ntrk1      | 25  | 11.27597538 | 12.12570065 | 0.849725271  | 0.78116578 | 0.8876279   |
| Runx2      | 79  | 1.193567045 | 1.051053854 | -0.142513191 | 0.78127938 | 0.887688245 |
| Gdi2       | 61  | 1.226973214 | 1.267314511 | 0.040341297  | 0.78147831 | 0.887835743 |
| Traip      | 4   | 1.275111218 | 2.25        | 0.974888782  | 0.78189323 | 0.887835743 |
| Grina      | 20  | 1.422233723 | 1.258791574 | -0.163442149 | 0.78169541 | 0.887835743 |
| Fasn       | 75  | 1.378327081 | 1.287955716 | -0.090371365 | 0.78182473 | 0.887835743 |
| Pnpla7     | 33  | 0.931131968 | 1.202978663 | 0.271846695  | 0.78165718 | 0.887835743 |
| Tnfaip2    | 24  | 5.339340625 | 5.05777181  | -0.281568815 | 0.78174992 | 0.887835743 |
| Scfd1      | 10  | 1.474019858 | 2.156526013 | 0.682506155  | 0.78183486 | 0.887835743 |
| Ttc7       | 35  | 1.195012169 | 1.117972788 | -0.07703938  | 0.78187234 | 0.887835743 |
| Mterf3     | 86  | 1.385163571 | 1.183546043 | -0.201617529 | 0.78198408 | 0.887870191 |
| Mrps5      | 36  | 1.832773965 | 1.596408566 | -0.236365399 | 0.78216126 | 0.888002656 |
| Frrs1l     | 41  | 16.43903745 | 17.12602207 | 0.686984617  | 0.7822437  | 0.888027545 |
| Cltb       | 57  | 1.83072381  | 1.556668912 | -0.274054898 | 0.78266868 | 0.888323977 |
| Slc6a17    | 61  | 47.85726845 | 48.01392236 | 0.15665391   | 0.78272826 | 0.888323977 |
| Taok1      | 46  | 1.123739541 | 1.068134947 | -0.055604593 | 0.78279317 | 0.888323977 |
| 30502E09F  | 26  | 1.193036536 | 0.930719814 | -0.262316722 | 0.78280751 | 0.888323977 |
| Cct4       | 39  | 1.283158842 | 1.249738482 | -0.03342036  | 0.78279114 | 0.888323977 |
| Eci2       | 26  | 2.01530956  | 1.806031259 | -0.209278301 | 0.78312012 | 0.888610007 |
| Thap11     | 72  | 1.325506627 | 1.203345144 | -0.122161483 | 0.78322779 | 0.888651135 |
| Rabep1     | 101 | 1.559254613 | 1.490256058 | -0.068998555 | 0.78327748 | 0.888651135 |
| .10006O24F | 79  | 1.335288515 | 1.252436799 | -0.082851716 | 0.78370955 | 0.889003856 |
| Ube3c      | 93  | 0.836558068 | 0.74228172  | -0.094276348 | 0.78364932 | 0.889003856 |
| Pawr       | 64  | 1.71976546  | 1.412696571 | -0.30706889  | 0.78378491 | 0.889020625 |
| Skp2       | 12  | 1.879635908 | 1.934663971 | 0.055028062  | 0.78392076 | 0.889105982 |
| Rplp2      | 45  | 0.978393011 | 1.005596174 | 0.027203163  | 0.78432524 | 0.889423062 |
| Arf4       | 64  | 0.946180371 | 0.82188472  | -0.12429565  | 0.78444277 | 0.889423062 |
| Prpf8      | 4   | 0.45045045  | 0.235849057 | -0.214601394 | 0.78441894 | 0.889423062 |
| Pctp       | 15  | 1.756048284 | 1.25120616  | -0.504842124 | 0.78433155 | 0.889423062 |
| Kdelr1     | 15  | 1.247090743 | 1.768960308 | 0.521869564  | 0.78470011 | 0.889621535 |
| Eno1       | 26  | 1.274697199 | 1.466188751 | 0.191491552  | 0.78475096 | 0.889621535 |
| Lama3      | 28  | 6.185015788 | 6.571798899 | 0.386783111  | 0.78481686 | 0.889621535 |
| Synj1      | 61  | 1.065152867 | 0.855684769 | -0.209468098 | 0.78488767 | 0.889621535 |
| Dgcr8      | 64  | 1.070500238 | 0.996814519 | -0.073685719 | 0.78492095 | 0.889621535 |

|           |     |             |             |              |            |             |
|-----------|-----|-------------|-------------|--------------|------------|-------------|
| BC017643  | 4   | 1.42260524  | 0.597585685 | -0.825019555 | 0.78505264 | 0.889701355 |
| Cdkn2a    | 49  | 2.889033217 | 2.985409483 | 0.096376266  | 0.7851726  | 0.889701355 |
| Acad11    | 13  | 2.022911198 | 1.745989201 | -0.276921997 | 0.78517327 | 0.889701355 |
| Hook3     | 38  | 0.607888522 | 0.85421296  | 0.246324438  | 0.78542261 | 0.889915172 |
| Tmem55a   | 17  | 1.238087881 | 1.277350355 | 0.039262474  | 0.78549637 | 0.889930032 |
| Ddit4l    | 41  | 7.574632489 | 7.924678607 | 0.350046118  | 0.78564376 | 0.889959588 |
| Lrch1     | 36  | 1.55052494  | 1.453753401 | -0.096771539 | 0.78562606 | 0.889959588 |
| Yae1d1    | 17  | 0.907012518 | 1.13074784  | 0.223735322  | 0.7857653  | 0.890028558 |
| Atp11b    | 88  | 1.220180429 | 1.101332289 | -0.11884814  | 0.78662254 | 0.890881752 |
| Nup62cl   | 38  | 58.39022121 | 57.96863557 | -0.421585636 | 0.78681182 | 0.890881752 |
| Sass6     | 36  | 1.547008093 | 1.142519424 | -0.404488669 | 0.7868221  | 0.890881752 |
| 30503L19F | 7   | 1.063727622 | 1.135926733 | 0.072199111  | 0.78676326 | 0.890881752 |
| Phf20     | 42  | 1.160644871 | 1.143013398 | -0.017631474 | 0.78670212 | 0.890881752 |
| Pou6f1    | 35  | 1.640508593 | 1.656763602 | 0.016255009  | 0.78696331 | 0.890952807 |
| Hipk2     | 159 | 1.750455556 | 1.738912526 | -0.01154303  | 0.78700629 | 0.890952807 |
| Nrtn      | 60  | 1.821687884 | 1.61451136  | -0.207176524 | 0.78769344 | 0.89138687  |
| Shox2     | 97  | 19.83346757 | 20.39186012 | 0.558392546  | 0.78761622 | 0.89138687  |
| Fjx1      | 78  | 1.968798317 | 1.715522806 | -0.25327551  | 0.78764386 | 0.89138687  |
| Net1      | 57  | 1.37198325  | 1.525680732 | 0.153697482  | 0.78747383 | 0.89138687  |
| Usp8      | 45  | 0.934206146 | 1.019795823 | 0.085589677  | 0.78765158 | 0.89138687  |
| Bcas3     | 10  | 2.694104806 | 1.968830465 | -0.725274341 | 0.78815024 | 0.891766255 |
| Efnb2     | 106 | 1.191890023 | 1.151856646 | -0.040033376 | 0.78809181 | 0.891766255 |
| Dennd3    | 25  | 1.700877291 | 1.678334355 | -0.022542935 | 0.78832393 | 0.891894018 |
| Ccdc83    | 1   | 5.555555556 | 5           | -0.555555556 | 0.78867403 | 0.892221324 |
| Mfrp      | 10  | 68.19988916 | 68.34911171 | 0.149222558  | 0.78880717 | 0.892303147 |
| 30563E22F | 16  | 1.126362167 | 1.127853155 | 0.001490987  | 0.7888848  | 0.892322178 |
| Pola1     | 27  | 16.55360766 | 16.54509465 | -0.008513015 | 0.78896637 | 0.892345655 |
| 30018D20F | 39  | 1.122656338 | 1.298476924 | 0.175820586  | 0.7891337  | 0.892466119 |
| Slc18a1   | 13  | 0.938398163 | 0.529876395 | -0.408521768 | 0.78944413 | 0.892550692 |
| Ptger4    | 46  | 2.83280631  | 3.469551637 | 0.636745327  | 0.78944345 | 0.892550692 |
| Lrrc56    | 43  | 1.429747394 | 1.285418546 | -0.144328847 | 0.78945178 | 0.892550692 |
| Ptprf     | 59  | 1.605644807 | 1.543284335 | -0.062360472 | 0.78941024 | 0.892550692 |
| Ndufs4    | 12  | 1.448136813 | 1.177961836 | -0.270174977 | 0.78967818 | 0.892669101 |
| Smim3     | 23  | 0.87073102  | 0.596216946 | -0.274514075 | 0.7896689  | 0.892669101 |

|            |     |             |             |              |            |             |
|------------|-----|-------------|-------------|--------------|------------|-------------|
| Anln       | 41  | 0.976655302 | 1.059767629 | 0.083112327  | 0.78985334 | 0.89279833  |
| Fam69b     | 34  | 7.680424598 | 8.223322267 | 0.542897669  | 0.7899518  | 0.89284085  |
| Arhgdia    | 112 | 1.236942643 | 1.336404148 | 0.099461505  | 0.79044257 | 0.893326729 |
| Pwwp2a     | 52  | 1.039580008 | 1.197186075 | 0.157606067  | 0.79099479 | 0.893795878 |
| Brip1      | 35  | 1.192833426 | 1.14051279  | -0.052320636 | 0.79104042 | 0.893795878 |
| Cotl1      | 42  | 1.27326308  | 0.866951714 | -0.406311366 | 0.79094973 | 0.893795878 |
| Ecd        | 5   | 0.853658537 | 0.357142857 | -0.496515679 | 0.79117117 | 0.89387479  |
| Zkscan14   | 5   | 0.921052632 | 0.789640191 | -0.131412441 | 0.79128353 | 0.893932905 |
| Rpl37a     | 14  | 2.141025111 | 2.070692819 | -0.070332292 | 0.79167015 | 0.894300829 |
| 330026I12R | 1   | 47.76119403 | 50          | 2.23880597   | 0.79189079 | 0.894481215 |
| Pstk       | 31  | 1.085825697 | 1.200947285 | 0.115121588  | 0.79220493 | 0.894767181 |
| Tusc2      | 11  | 0.951814861 | 1.209182357 | 0.257367496  | 0.79227022 | 0.894772051 |
| Plekha1    | 100 | 1.254635376 | 1.138771845 | -0.115863531 | 0.79236009 | 0.894804678 |
| Anapc13    | 60  | 1.242337724 | 1.204889978 | -0.037447746 | 0.7927667  | 0.895194963 |
| Toe1       | 9   | 2.734078881 | 2.717120449 | -0.016958431 | 0.79290275 | 0.895279695 |
| Aff1       | 63  | 1.084278745 | 1.115752926 | 0.03147418   | 0.79319744 | 0.895543523 |
| Uhrf1      | 55  | 4.283487851 | 3.995786822 | -0.28770103  | 0.7933881  | 0.895552074 |
| '00063O14F | 1   | 94.05940594 | 94.87179487 | 0.812388931  | 0.79338258 | 0.895552074 |
| Hsd17b7    | 27  | 1.326584817 | 1.246235413 | -0.080349404 | 0.7933287  | 0.895552074 |
| Usp18      | 19  | 1.69959794  | 1.837118436 | 0.137520497  | 0.79346254 | 0.895567215 |
| Pgrmc1     | 28  | 19.4372813  | 19.29904928 | -0.138232014 | 0.79374364 | 0.895677806 |
| Tmpo       | 175 | 1.144173593 | 1.066729998 | -0.077443595 | 0.79370863 | 0.895677806 |
| Mxi1       | 111 | 1.101835569 | 1.130760342 | 0.028924774  | 0.79363975 | 0.895677806 |
| Il7        | 21  | 1.727493059 | 1.584601805 | -0.142891254 | 0.79381574 | 0.895690283 |
| Gsr        | 34  | 3.787428918 | 3.71597793  | -0.071450988 | 0.79397187 | 0.895797571 |
| Dnajc19    | 11  | 2.684140824 | 1.982160083 | -0.701980741 | 0.79405911 | 0.895827123 |
| Fzd4       | 46  | 1.667673891 | 1.62517101  | -0.042502881 | 0.79417733 | 0.895891611 |
| Bzw2       | 13  | 1.250870099 | 1.115461248 | -0.135408852 | 0.79432855 | 0.895993327 |
| Ola1       | 49  | 1.606640763 | 1.192581927 | -0.414058836 | 0.79443317 | 0.896042456 |
| Arhgef39   | 24  | 0.927598309 | 0.959379533 | 0.031781224  | 0.79460265 | 0.896164723 |
| Gpr62      | 16  | 8.965419976 | 10.529712   | 1.564292028  | 0.79487127 | 0.896253209 |
| Katnal1    | 43  | 1.70275137  | 1.234230179 | -0.468521191 | 0.79479918 | 0.896253209 |
| Elp3       | 7   | 0.214822771 | 0.090415913 | -0.124406858 | 0.79492541 | 0.896253209 |
| Zbtb39     | 52  | 1.173682982 | 1.341583466 | 0.167900484  | 0.79482815 | 0.896253209 |

|            |     |             |             |              |            |             |
|------------|-----|-------------|-------------|--------------|------------|-------------|
| Samhd1     | 16  | 1.495557927 | 1.425413776 | -0.070144151 | 0.79516957 | 0.896338146 |
| Ggct       | 30  | 1.742168394 | 1.415534994 | -0.3266334   | 0.795184   | 0.896338146 |
| Lacc1      | 19  | 0.923714012 | 1.273375177 | 0.349661165  | 0.79517888 | 0.896338146 |
| Col4a3bp   | 66  | 1.223366502 | 1.373618737 | 0.150252236  | 0.7953623  | 0.896470267 |
| Mroh8      | 68  | 1.069656287 | 1.008578197 | -0.06107809  | 0.79551446 | 0.896514394 |
| Tmem167b   | 23  | 1.139368739 | 1.269597294 | 0.130228555  | 0.79552364 | 0.896514394 |
| Mir3077    | 15  | 0.949215253 | 1.154742827 | 0.205527574  | 0.79583917 | 0.896801106 |
| Rab11fip4  | 43  | 10.6182228  | 11.26968509 | 0.651462291  | 0.79609278 | 0.897018006 |
| Dck        | 46  | 1.269410574 | 1.319034885 | 0.049624311  | 0.79630543 | 0.897188717 |
| Utp6       | 22  | 2.009933067 | 2.265073088 | 0.255140021  | 0.79647189 | 0.897307368 |
| Acvr2b     | 65  | 1.475031937 | 1.518344309 | 0.043312372  | 0.79654818 | 0.897324431 |
| 130465K10F | 49  | 0.878679905 | 0.756802248 | -0.121877657 | 0.79666424 | 0.897386283 |
| Sec24c     | 18  | 1.711504719 | 1.795112466 | 0.083607747  | 0.79712672 | 0.897821022 |
| Hist1h4a   | 39  | 1.917405349 | 1.572480078 | -0.344925271 | 0.79717256 | 0.897821022 |
| Lrch4      | 19  | 1.518719745 | 1.193293939 | -0.325425807 | 0.79747633 | 0.897980512 |
| Ppp1r11    | 7   | 2.891872036 | 2.20426979  | -0.687602246 | 0.79749851 | 0.897980512 |
| Gm20605    | 19  | 1.518719745 | 1.193293939 | -0.325425807 | 0.79747633 | 0.897980512 |
| Tra2a      | 29  | 1.271546198 | 1.174708263 | -0.096837935 | 0.79755895 | 0.897980512 |
| Bmp8a      | 12  | 5.149361262 | 4.831454211 | -0.317907051 | 0.79763646 | 0.897998881 |
| Pggt1b     | 23  | 1.324166422 | 0.954448739 | -0.369717684 | 0.79773264 | 0.898038265 |
| Zfp157     | 5   | 1.608298411 | 1.869168978 | 0.260870567  | 0.79780221 | 0.898047684 |
| Hs6st1     | 140 | 1.343393447 | 1.151955823 | -0.191437624 | 0.79807128 | 0.89828166  |
| Cwc25      | 7   | 2.002778053 | 2.633856134 | 0.631078081  | 0.79813519 | 0.898284691 |
| Snx30      | 33  | 1.726035878 | 1.745807072 | 0.019771194  | 0.79835634 | 0.898346473 |
| Coa6       | 35  | 1.32457706  | 1.291909071 | -0.032667988 | 0.7983542  | 0.898346473 |
| Dnttip1    | 50  | 1.005307857 | 0.901276027 | -0.10403183  | 0.79837375 | 0.898346473 |
| Fam174a    | 29  | 2.239502183 | 1.740868563 | -0.49863362  | 0.79849323 | 0.898412026 |
| Kcns2      | 51  | 29.54551859 | 30.67713985 | 1.131621268  | 0.79865311 | 0.898475811 |
| Duox2      | 1   | 38.88888889 | 40.90909091 | 2.02020202   | 0.79900548 | 0.898475811 |
| Mir200c    | 16  | 84.60604613 | 85.38390938 | 0.777863243  | 0.79900846 | 0.898475811 |
| Mthfd1l    | 19  | 1.462823145 | 1.223751246 | -0.239071899 | 0.79903975 | 0.898475811 |
| Tbc1d13    | 16  | 2.089375299 | 2.248028727 | 0.158653428  | 0.79892087 | 0.898475811 |
| Pou2f1     | 104 | 1.275734574 | 1.080701936 | -0.195032638 | 0.79867393 | 0.898475811 |
| Tesk2      | 44  | 1.296056415 | 1.707686242 | 0.411629827  | 0.79878699 | 0.898475811 |



|            |     |             |             |              |            |             |
|------------|-----|-------------|-------------|--------------|------------|-------------|
| Snrnp35    | 26  | 1.698344411 | 1.847897376 | 0.149552965  | 0.79896463 | 0.898475811 |
| Supt4a     | 11  | 1.51948094  | 1.535176268 | 0.015695328  | 0.79913232 | 0.898511049 |
| Cd55       | 25  | 6.471231066 | 6.708520962 | 0.237289896  | 0.79952178 | 0.898811199 |
| Trpc1      | 27  | 1.13775528  | 1.101380808 | -0.036374472 | 0.79950575 | 0.898811199 |
| Mtch2      | 52  | 1.04381378  | 1.070386347 | 0.026572567  | 0.79967884 | 0.898918893 |
| Leng1      | 21  | 9.549483407 | 9.606654227 | 0.05717082   | 0.79985712 | 0.899031839 |
| Mier3      | 120 | 1.126308985 | 1.105140727 | -0.021168258 | 0.79990185 | 0.899031839 |
| Cbr4       | 15  | 1.817292957 | 1.676109609 | -0.141183348 | 0.80043514 | 0.899493428 |
| Smox       | 55  | 1.534775385 | 1.502500655 | -0.03227473  | 0.80041407 | 0.899493428 |
| Brd1       | 137 | 1.135358566 | 0.910996342 | -0.224362224 | 0.80075351 | 0.899588451 |
| Siah2      | 95  | 1.244759889 | 1.329394608 | 0.084634719  | 0.80076491 | 0.899588451 |
| Rfc2       | 19  | 1.658435084 | 1.588949743 | -0.069485341 | 0.80066592 | 0.899588451 |
| Hrk        | 87  | 8.351188846 | 8.371656145 | 0.0204673    | 0.80074079 | 0.899588451 |
| Lmf2       | 21  | 1.345049502 | 1.484653605 | 0.139604103  | 0.8012632  | 0.900079318 |
| Ppp1cb     | 37  | 0.949343007 | 0.928229248 | -0.021113759 | 0.80152419 | 0.900303582 |
| Lama5      | 52  | 1.663616578 | 1.634033942 | -0.029582635 | 0.80160376 | 0.90031854  |
| Alpl       | 55  | 11.01309067 | 13.88828895 | 2.87519828   | 0.80166022 | 0.90031854  |
| Trmt61a    | 22  | 0.722613151 | 0.684841437 | -0.037771715 | 0.80183137 | 0.900441838 |
| Ncs1       | 139 | 2.64383475  | 2.446858517 | -0.196976234 | 0.80198466 | 0.900446417 |
| Ppp1r10    | 60  | 1.301230849 | 1.403586343 | 0.102355494  | 0.80201954 | 0.900446417 |
| Inha       | 3   | 39.78442728 | 37.7306286  | -2.053798683 | 0.80197847 | 0.900446417 |
| Stard3     | 46  | 1.188156982 | 1.215989983 | 0.027833002  | 0.80227148 | 0.900660366 |
| Ppp2r2a    | 23  | 2.548692149 | 2.089722461 | -0.458969688 | 0.80284881 | 0.9007572   |
| Fam160b2   | 65  | 1.549922983 | 1.46081885  | -0.089104133 | 0.80264722 | 0.9007572   |
| Pidd1      | 4   | 13.29307789 | 13.61002031 | 0.316942424  | 0.80274691 | 0.9007572   |
| AV051173   | 16  | 0.922479365 | 0.878006542 | -0.044472822 | 0.80273807 | 0.9007572   |
| Snx16      | 49  | 0.994888146 | 1.037651301 | 0.042763155  | 0.80242838 | 0.9007572   |
| Chchd6     | 13  | 0.918121367 | 0.731060024 | -0.187061343 | 0.80266562 | 0.9007572   |
| Apcdd1     | 93  | 2.530511452 | 2.354829292 | -0.17568216  | 0.80252451 | 0.9007572   |
| Pank3      | 57  | 1.476974398 | 1.415886505 | -0.061087893 | 0.80281347 | 0.9007572   |
| Nubp2      | 1   | 11.65644172 | 12.58741259 | 0.93097087   | 0.80330951 | 0.901205182 |
| Hist1h4i   | 7   | 1.487720686 | 1.346045553 | -0.141675133 | 0.8036812  | 0.901534533 |
| Plcx2      | 17  | 1.874495873 | 1.80171234  | -0.072783533 | 0.80397171 | 0.901534533 |
| JC1026344C | 25  | 74.91325698 | 74.70010513 | -0.213151854 | 0.80391467 | 0.901534533 |

|            |    |             |             |              |            |             |
|------------|----|-------------|-------------|--------------|------------|-------------|
| Snord2     | 25 | 0.520261896 | 0.697955238 | 0.177693342  | 0.80376325 | 0.901534533 |
| Taldo1     | 9  | 2.417439162 | 1.817584136 | -0.599855026 | 0.80396098 | 0.901534533 |
| Mrrf       | 9  | 1.78486824  | 1.745388796 | -0.039479444 | 0.80383248 | 0.901534533 |
| 110001I22R | 38 | 1.816438715 | 1.616842114 | -0.199596601 | 0.80406088 | 0.901565629 |
| Tex264     | 59 | 1.335877707 | 1.293645538 | -0.042232169 | 0.80424224 | 0.901700084 |
| Tcof1      | 5  | 1.400460537 | 1.680506129 | 0.280045592  | 0.80432166 | 0.901720231 |
| Phldb1     | 5  | 3.831732829 | 3.353513774 | -0.478219055 | 0.80454006 | 0.901896163 |
| Slc7a1     | 51 | 0.789612514 | 0.82104928  | 0.031436767  | 0.80466916 | 0.901971984 |
| Dpp9       | 44 | 1.14488167  | 1.111621051 | -0.033260619 | 0.80490837 | 0.902102301 |
| Cryab      | 12 | 59.78993202 | 58.50505188 | -1.284880141 | 0.80487928 | 0.902102301 |
| Tmem30a    | 52 | 1.280119887 | 1.410242639 | 0.130122752  | 0.8049825  | 0.902116484 |
| .10008P14F | 33 | 1.231684925 | 1.091221619 | -0.140463306 | 0.80517139 | 0.902259255 |
| Zfp708     | 13 | 2.296319842 | 2.401467167 | 0.105147326  | 0.80530684 | 0.902342132 |
| Ctnna3     | 33 | 0.988608385 | 0.715251743 | -0.273356642 | 0.80554048 | 0.902509524 |
| Mettl18    | 8  | 2.131131613 | 1.92393637  | -0.207195243 | 0.80557924 | 0.902509524 |
| Sdc1       | 30 | 1.573801689 | 1.540716964 | -0.033084725 | 0.80564589 | 0.902515288 |
| Adprh      | 22 | 1.237006132 | 0.941559916 | -0.295446216 | 0.80586321 | 0.902689832 |
| Mthfd2l    | 71 | 1.278873115 | 1.102933022 | -0.175940093 | 0.80622762 | 0.902969039 |
| Agfg1      | 76 | 1.361168876 | 1.322618942 | -0.038549934 | 0.80623554 | 0.902969039 |
| Tctex1d4   | 1  | 69.36936937 | 67.91044776 | -1.458921608 | 0.80647884 | 0.903034759 |
| Als2cl     | 14 | 0.290697674 | 0.488367303 | 0.197669628  | 0.80641267 | 0.903034759 |
| Acsl5      | 4  | 4.954189049 | 4.573155956 | -0.381033093 | 0.80646104 | 0.903034759 |
| Golga3     | 35 | 1.895093818 | 1.728190332 | -0.166903486 | 0.806821   | 0.903348953 |
| Dcun1d3    | 20 | 1.675374957 | 1.873410978 | 0.198036021  | 0.80706349 | 0.903447532 |
| Swt1       | 44 | 1.652665222 | 1.595369425 | -0.057295797 | 0.80700968 | 0.903447532 |
| Dusp14     | 83 | 1.069776029 | 0.951489548 | -0.118286481 | 0.80709375 | 0.903447532 |
| Aspscr1    | 67 | 1.589232523 | 1.328328686 | -0.260903837 | 0.80719696 | 0.903494138 |
| Bcdin3d    | 28 | 1.265681864 | 1.272268857 | 0.006586994  | 0.80730895 | 0.903550568 |
| Nfia       | 23 | 13.97684682 | 12.4005281  | -1.576318725 | 0.80758739 | 0.903793269 |
| Gba2       | 26 | 2.332891675 | 2.225383334 | -0.107508341 | 0.80797619 | 0.904159429 |
| Mgat4b     | 76 | 1.586753145 | 1.32715529  | -0.259597855 | 0.80818701 | 0.904326383 |
| Uvrag      | 59 | 1.364821929 | 1.213373398 | -0.15144853  | 0.80830277 | 0.904386955 |
| Vcp        | 28 | 1.101121693 | 1.072592552 | -0.028529141 | 0.80858707 | 0.904636069 |
| Lrrc63     | 7  | 1.573347288 | 1.376190476 | -0.197156811 | 0.80876654 | 0.904739746 |

|            |     |             |             |              |            |             |
|------------|-----|-------------|-------------|--------------|------------|-------------|
| Sdha       | 22  | 1.097190532 | 1.164290329 | 0.067099797  | 0.80880305 | 0.904739746 |
| AV039307   | 21  | 2.488098617 | 2.747176005 | 0.259077388  | 0.80902203 | 0.904806136 |
| I10035C23F | 26  | 2.430471339 | 1.645685936 | -0.784785404 | 0.80898327 | 0.904806136 |
| Tapt1      | 167 | 1.271483908 | 1.338875173 | 0.067391265  | 0.80904738 | 0.904806136 |
| Cog3       | 69  | 1.013385532 | 0.98864779  | -0.024737741 | 0.8091641  | 0.904829095 |
| Id1        | 1   | 6.598984772 | 7.168458781 | 0.56947401   | 0.80919124 | 0.904829095 |
| Peli1      | 57  | 1.004832143 | 0.997526054 | -0.007306089 | 0.8093412  | 0.904927824 |
| Ciz1       | 24  | 0.864030044 | 0.884159293 | 0.020129249  | 0.8095489  | 0.905091085 |
| Tubg1      | 17  | 0.708363962 | 0.68221555  | -0.026148412 | 0.80969397 | 0.905153948 |
| Slc9a5     | 10  | 1.244636171 | 1.171782623 | -0.072853549 | 0.80979018 | 0.905153948 |
| Yme1l1     | 34  | 1.142069921 | 1.294241448 | 0.152171527  | 0.80975687 | 0.905153948 |
| Zfp638     | 41  | 1.276871743 | 1.179762212 | -0.09710953  | 0.80985277 | 0.905154967 |
| Cdk6       | 46  | 0.986087139 | 0.920958564 | -0.065128575 | 0.80992905 | 0.90517128  |
| Kdm2b      | 102 | 1.371177359 | 1.193330053 | -0.177847306 | 0.81000305 | 0.905185044 |
| Gskip      | 41  | 1.537145182 | 1.584009548 | 0.046864366  | 0.8107277  | 0.905856867 |
| Tmem220    | 4   | 1.075268817 | 1.298701299 | 0.223432481  | 0.81066599 | 0.905856867 |
| Snord15a   | 23  | 1.336411881 | 1.405807392 | 0.069395511  | 0.81088928 | 0.905956554 |
| Gls        | 68  | 0.977766871 | 0.792554484 | -0.185212388 | 0.81094039 | 0.905956554 |
| Glr3       | 17  | 1.348250563 | 1.044887175 | -0.303363388 | 0.81129329 | 0.906074872 |
| Oaz1-ps    | 30  | 0.817535662 | 0.868984644 | 0.051448982  | 0.81114802 | 0.906074872 |
| Epb4.1l2   | 52  | 1.593405501 | 1.328445287 | -0.264960214 | 0.81122174 | 0.906074872 |
| Atg4b      | 44  | 0.686843831 | 0.670957682 | -0.015886149 | 0.81123532 | 0.906074872 |
| Stx6       | 59  | 1.103859688 | 1.308842803 | 0.204983115  | 0.81155766 | 0.906301152 |
| Gps2       | 42  | 2.464510168 | 2.553233834 | 0.088723666  | 0.81162499 | 0.90630737  |
| Hdac10     | 21  | 1.519762104 | 1.49490608  | -0.024856024 | 0.81189415 | 0.906401    |
| Snord110   | 23  | 0.876950782 | 0.937194687 | 0.060243905  | 0.8118802  | 0.906401    |
| Aco1       | 27  | 1.549371317 | 1.276425344 | -0.272945973 | 0.81189236 | 0.906401    |
| Diap3      | 57  | 1.180465749 | 1.256032286 | 0.075566536  | 0.81205506 | 0.906511671 |
| Fbxo34     | 65  | 1.31864996  | 1.146078123 | -0.172571836 | 0.81217681 | 0.906538136 |
| Slc12a7    | 42  | 1.171945266 | 1.099134187 | -0.072811079 | 0.8122851  | 0.906538136 |
| Cldn12     | 53  | 1.636811893 | 1.508690111 | -0.128121783 | 0.81232588 | 0.906538136 |
| Slc4a2     | 45  | 6.820541383 | 5.633689113 | -1.18685227  | 0.81223079 | 0.906538136 |
| Ift122     | 15  | 1.410258697 | 1.218726813 | -0.191531884 | 0.81250291 | 0.906611549 |
| I32412D23F | 82  | 1.49281598  | 1.364917019 | -0.127898962 | 0.81251523 | 0.906611549 |

|            |     |             |             |              |            |             |
|------------|-----|-------------|-------------|--------------|------------|-------------|
| Pold2      | 17  | 0.863277632 | 1.095022092 | 0.23174446   | 0.81259727 | 0.906634151 |
| Sh3glb1    | 62  | 1.099598978 | 1.276511796 | 0.176912818  | 0.812706   | 0.906686529 |
| Prr14l     | 18  | 0.777007245 | 0.760889449 | -0.016117796 | 0.81298412 | 0.906927848 |
| Atxn10     | 16  | 1.481189095 | 1.363679234 | -0.117509861 | 0.81312548 | 0.907016592 |
| Tmem170b   | 139 | 0.95188628  | 1.006039294 | 0.054153014  | 0.81322065 | 0.907053802 |
| Batf3      | 44  | 4.874838207 | 5.350322065 | 0.475483858  | 0.81328714 | 0.90705902  |
| 190005I06R | 51  | 1.682211103 | 1.509223832 | -0.17298727  | 0.81336946 | 0.907081884 |
| Dph5       | 5   | 0.744680851 | 0.651652591 | -0.09302826  | 0.81363066 | 0.907098227 |
| Tmem87a    | 6   | 0.877192982 | 0.56709582  | -0.310097162 | 0.81389681 | 0.907098227 |
| '00017B05F | 74  | 1.183791129 | 1.216221887 | 0.032430758  | 0.81400228 | 0.907098227 |
| Ubqln4     | 41  | 1.669662953 | 1.562674124 | -0.10698883  | 0.8137282  | 0.907098227 |
| Zcchc6     | 50  | 1.517795013 | 1.229947816 | -0.287847197 | 0.8139717  | 0.907098227 |
| Cnn3       | 90  | 1.418962589 | 1.360270694 | -0.058691896 | 0.81373566 | 0.907098227 |
| Gng10      | 69  | 1.030325255 | 0.763163628 | -0.267161627 | 0.81382074 | 0.907098227 |
| Ganc       | 6   | 0.877192982 | 0.56709582  | -0.310097162 | 0.81389681 | 0.907098227 |
| Srebfl     | 31  | 1.311466462 | 1.259998733 | -0.051467729 | 0.81386123 | 0.907098227 |
| Efhd2      | 39  | 1.441589925 | 1.404645939 | -0.036943986 | 0.8138693  | 0.907098227 |
| Rem1       | 42  | 18.5396091  | 19.6804618  | 1.140852696  | 0.81408505 | 0.907108182 |
| Mkl1       | 37  | 1.209684416 | 1.271659308 | 0.061974892  | 0.81413485 | 0.907108182 |
| Lactb      | 55  | 1.300200332 | 1.247959061 | -0.052241271 | 0.81427272 | 0.907192918 |
| Acad12     | 16  | 0.856109535 | 0.54668572  | -0.309423815 | 0.81444202 | 0.907312648 |
| Zfp260     | 4   | 2.156421197 | 2.333342756 | 0.176921559  | 0.81459287 | 0.90741181  |
| Gtf3c1     | 35  | 1.070233067 | 1.060978816 | -0.009254251 | 0.81487944 | 0.907618728 |
| Bri3bp     | 78  | 1.037320406 | 0.920733379 | -0.116587026 | 0.81490233 | 0.907618728 |
| Mir8101    | 75  | 1.246371628 | 1.151278884 | -0.095092744 | 0.81552696 | 0.90769437  |
| Atp7b      | 31  | 1.28153066  | 1.574402135 | 0.292871475  | 0.81507939 | 0.90769437  |
| Ivd        | 10  | 0.977491472 | 0.952759688 | -0.024731783 | 0.81533996 | 0.90769437  |
| Prrg4      | 27  | 1.077977531 | 1.045942673 | -0.032034858 | 0.81551205 | 0.90769437  |
| Slc5a6     | 20  | 2.268921364 | 1.841057028 | -0.427864336 | 0.81545738 | 0.90769437  |
| '00038G22F | 13  | 0.753839578 | 0.62139527  | -0.132444308 | 0.8152602  | 0.90769437  |
| Josd2      | 25  | 21.03333451 | 20.9645707  | -0.068763817 | 0.81529325 | 0.90769437  |
| Rmdn1      | 7   | 0.71942446  | 0.822416867 | 0.102992406  | 0.81540064 | 0.90769437  |
| Fbxo28     | 59  | 1.659856642 | 1.391071417 | -0.268785225 | 0.81538081 | 0.90769437  |
| Sh2b3      | 92  | 1.420233134 | 1.25528536  | -0.164947774 | 0.81580395 | 0.907933806 |

|            |     |             |             |              |            |             |
|------------|-----|-------------|-------------|--------------|------------|-------------|
| Faap100    | 70  | 1.035285137 | 0.954238306 | -0.081046831 | 0.81614031 | 0.908170387 |
| Esco1      | 60  | 0.853988875 | 0.659483402 | -0.194505473 | 0.81613034 | 0.908170387 |
| Mrpl43     | 69  | 0.981168067 | 0.930085149 | -0.051082918 | 0.81623338 | 0.908205084 |
| Plekhf1    | 46  | 1.058128288 | 1.095643651 | 0.037515363  | 0.81635212 | 0.908268327 |
| I30427A07F | 36  | 1.291095811 | 1.559031331 | 0.26793552   | 0.8164859  | 0.908348296 |
| Mrps21     | 4   | 94.17377927 | 93.62206057 | -0.551718697 | 0.81668675 | 0.908501885 |
| Sh3tc2     | 5   | 76.33520356 | 73.3270362  | -3.008167359 | 0.81674778 | 0.908501885 |
| Ube4a      | 25  | 1.893608205 | 1.816172174 | -0.07743603  | 0.81694858 | 0.908506672 |
| Krt27      | 8   | 92.08095576 | 91.38217426 | -0.698781498 | 0.81693816 | 0.908506672 |
| Coq5       | 42  | 1.213018024 | 1.25797583  | 0.044957807  | 0.81699973 | 0.908506672 |
| Abcb4      | 51  | 5.66459686  | 5.704868111 | 0.04027125   | 0.81688506 | 0.908506672 |
| Vrk2       | 13  | 2.199042651 | 2.045030312 | -0.15401234  | 0.8171567  | 0.908543523 |
| Arl2       | 53  | 1.352721442 | 1.299431173 | -0.053290269 | 0.8171044  | 0.908543523 |
| Ripk2      | 90  | 1.700353985 | 1.62309415  | -0.077259836 | 0.81738678 | 0.908730478 |
| Maea       | 77  | 1.88664155  | 1.807608485 | -0.079033065 | 0.81755885 | 0.908852916 |
| Fech       | 41  | 1.244222681 | 1.097939138 | -0.146283542 | 0.81766593 | 0.908903103 |
| Ywhae      | 43  | 1.441391422 | 1.325099449 | -0.116291973 | 0.81783845 | 0.909026017 |
| Lnpep      | 122 | 1.48249865  | 1.322019207 | -0.160479443 | 0.81794334 | 0.909073743 |
| Mphosph6   | 28  | 3.017034511 | 2.775504817 | -0.241529694 | 0.81820679 | 0.909228807 |
| Gm13986    | 1   | 13.86138614 | 14.92537313 | 1.063986996  | 0.81818099 | 0.909228807 |
| Lncbate1   | 1   | 80.55555556 | 79.33884298 | -1.21671258  | 0.81846525 | 0.909336489 |
| Kif18b     | 38  | 1.380248387 | 1.375424471 | -0.004823916 | 0.8186755  | 0.909336489 |
| Armc8      | 26  | 1.374330366 | 1.05758254  | -0.316747827 | 0.81849255 | 0.909336489 |
| Ddx3x      | 16  | 2.012708453 | 1.899812881 | -0.112895573 | 0.81865462 | 0.909336489 |
| Plscr1     | 12  | 1.698064839 | 1.351277669 | -0.346787169 | 0.81863458 | 0.909336489 |
| Smad6      | 47  | 1.249657347 | 1.684032612 | 0.434375265  | 0.81838621 | 0.909336489 |
| Gucd1      | 30  | 1.630812939 | 1.56089833  | -0.06991461  | 0.81886994 | 0.909414776 |
| Ddx10      | 41  | 1.784643469 | 1.599084432 | -0.185559037 | 0.8188653  | 0.909414776 |
| Ascc2      | 16  | 1.462475843 | 1.796700643 | 0.3342248    | 0.81915925 | 0.909667237 |
| Agpat3     | 102 | 1.106902833 | 1.17207293  | 0.065170097  | 0.81938251 | 0.909707264 |
| Stag3      | 15  | 4.667867187 | 4.518894369 | -0.148972818 | 0.81962926 | 0.909707264 |
| Ppp2r5d    | 46  | 1.6555436   | 1.545950279 | -0.10959332  | 0.8193037  | 0.909707264 |
| Cep128     | 20  | 1.151639924 | 1.104783594 | -0.046856331 | 0.81938855 | 0.909707264 |
| Dedd2      | 2   | 2.69655704  | 3.416149068 | 0.719592028  | 0.81956989 | 0.909707264 |

|           |     |             |             |              |            |             |
|-----------|-----|-------------|-------------|--------------|------------|-------------|
| Smc3      | 72  | 1.120732856 | 1.005292919 | -0.115439936 | 0.81961339 | 0.909707264 |
| Cox14     | 25  | 1.432581894 | 1.062060819 | -0.370521075 | 0.8196094  | 0.909707264 |
| Fam20b    | 76  | 1.268016595 | 1.135351641 | -0.132664954 | 0.82033752 | 0.910149162 |
| Cnih1     | 55  | 0.933586941 | 0.991414695 | 0.057827753  | 0.82027655 | 0.910149162 |
| Chst14    | 20  | 1.49542996  | 1.477440871 | -0.017989088 | 0.82015694 | 0.910149162 |
| Zmat4     | 9   | 18.61296514 | 18.33506193 | -0.277903211 | 0.82018936 | 0.910149162 |
| Prr12     | 15  | 3.327672768 | 3.141507268 | -0.1861655   | 0.82026681 | 0.910149162 |
| Ptpn13    | 102 | 1.508885641 | 1.441705827 | -0.067179814 | 0.82060683 | 0.910379115 |
| Cep295    | 33  | 1.03771157  | 0.884702288 | -0.153009283 | 0.82074025 | 0.9104583   |
| Fam229b   | 5   | 0.727272727 | 0.40405071  | -0.323222017 | 0.82089997 | 0.910566651 |
| Cbx1      | 12  | 1.107636984 | 1.235385156 | 0.127748172  | 0.82109815 | 0.910648797 |
| Alyref    | 84  | 1.037892609 | 1.070263414 | 0.032370805  | 0.82108142 | 0.910648797 |
| Melk      | 23  | 2.120144279 | 1.884397159 | -0.23574712  | 0.8211634  | 0.910652333 |
| Tmem2     | 53  | 1.779651584 | 1.664915028 | -0.114736556 | 0.82152698 | 0.910819077 |
| Lmbrd2    | 25  | 1.443552606 | 1.396894259 | -0.046658347 | 0.82143067 | 0.910819077 |
| Atxn7l1   | 22  | 0.355424994 | 0.724553413 | 0.369128419  | 0.82156204 | 0.910819077 |
| Fam129a   | 20  | 10.61554748 | 10.71999701 | 0.10444953   | 0.82153606 | 0.910819077 |
| Dstn      | 27  | 1.405138482 | 1.51731389  | 0.112175408  | 0.82171488 | 0.910850899 |
| Exoc2     | 38  | 1.316953102 | 1.109951516 | -0.207001586 | 0.82165641 | 0.910850899 |
| Zranb3    | 7   | 1.023442858 | 1.322259136 | 0.298816278  | 0.82198803 | 0.911066525 |
| Sgsm3     | 37  | 6.217566787 | 6.051482129 | -0.166084658 | 0.82214646 | 0.911066525 |
| Akap12    | 38  | 23.59417282 | 25.10240452 | 1.508231698  | 0.82215776 | 0.911066525 |
| Fpgs      | 52  | 7.365966746 | 7.091344085 | -0.274622661 | 0.82205186 | 0.911066525 |
| 30403L14F | 58  | 1.445705097 | 1.338151671 | -0.107553425 | 0.82245566 | 0.911327823 |
| Spdye4b   | 7   | 1.096182729 | 1.288673662 | 0.192490933  | 0.82272714 | 0.911333843 |
| Adck5     | 38  | 1.3964868   | 1.352284358 | -0.044202442 | 0.82289583 | 0.911333843 |
| Cdc25c    | 10  | 2.204732632 | 2.790653983 | 0.585921351  | 0.82285159 | 0.911333843 |
| Zbtb43    | 41  | 0.98259183  | 1.027888253 | 0.045296423  | 0.82259824 | 0.911333843 |
| Eif2ak3   | 38  | 1.310866527 | 1.160272628 | -0.150593899 | 0.8228782  | 0.911333843 |
| Rpa1      | 32  | 0.980808839 | 0.975599363 | -0.005209476 | 0.82282876 | 0.911333843 |
| Zfyve27   | 55  | 1.490793667 | 1.065808623 | -0.424985043 | 0.82257734 | 0.911333843 |
| 32491K20F | 9   | 0.408691056 | 0.614570615 | 0.205879559  | 0.82343009 | 0.911375258 |
| Nol4      | 41  | 13.27871728 | 13.21518457 | -0.063532707 | 0.82342109 | 0.911375258 |
| Ccdc91    | 60  | 1.468801598 | 1.505237842 | 0.036436244  | 0.8231108  | 0.911375258 |

|            |     |             |             |              |            |             |
|------------|-----|-------------|-------------|--------------|------------|-------------|
| Rnf170     | 78  | 1.172814978 | 1.152709138 | -0.02010584  | 0.82308236 | 0.911375258 |
| Dusp4      | 68  | 1.428302828 | 1.345825613 | -0.082477215 | 0.8232854  | 0.911375258 |
| Eef2       | 47  | 1.029570736 | 1.152479244 | 0.122908508  | 0.82323853 | 0.911375258 |
| Gnpat      | 16  | 0.623944666 | 0.697986314 | 0.074041649  | 0.82336455 | 0.911375258 |
| Atg2a      | 20  | 1.183725927 | 1.071320822 | -0.112405105 | 0.82315249 | 0.911375258 |
| Nagk       | 32  | 1.898085729 | 1.951648624 | 0.053562895  | 0.82365369 | 0.911553978 |
| Ttll4      | 22  | 1.527555119 | 1.41596415  | -0.11159097  | 0.82416333 | 0.911661372 |
| Tdrd3      | 148 | 1.05730342  | 0.985205778 | -0.072097642 | 0.82404129 | 0.911661372 |
| Taco1      | 30  | 1.330505972 | 1.337372738 | 0.006866766  | 0.82426867 | 0.911661372 |
| Prkrir     | 86  | 1.306802734 | 1.138525226 | -0.168277508 | 0.82412528 | 0.911661372 |
| Klhl8      | 43  | 1.076082573 | 0.944561679 | -0.131520894 | 0.82391739 | 0.911661372 |
| Arl6       | 26  | 1.092556273 | 1.068477146 | -0.024079126 | 0.8239805  | 0.911661372 |
| Utp14a     | 5   | 11.21524309 | 10.86056717 | -0.354675918 | 0.82393668 | 0.911661372 |
| Pigp       | 43  | 1.192419848 | 1.421816258 | 0.229396409  | 0.82430725 | 0.911661372 |
| Rufy2      | 19  | 2.860772206 | 4.379201311 | 1.518429105  | 0.82430987 | 0.911661372 |
| Gas8       | 15  | 4.72587689  | 4.553981002 | -0.171895888 | 0.82442063 | 0.91171515  |
| Zfp277     | 15  | 0.954548623 | 0.954160837 | -0.000387787 | 0.82465796 | 0.911908881 |
| Bok        | 59  | 1.343170412 | 1.387435384 | 0.044264973  | 0.82483969 | 0.912041112 |
| Esrp1      | 19  | 9.000799318 | 9.534767533 | 0.533968215  | 0.82510736 | 0.912268344 |
| Ppp1r35    | 42  | 1.398640486 | 1.322676963 | -0.075963523 | 0.82517203 | 0.912271103 |
| Dnaic1     | 10  | 0.97430681  | 0.996581291 | 0.022274482  | 0.82529749 | 0.912272339 |
| Rfc3       | 42  | 1.907858461 | 1.86796383  | -0.039894631 | 0.82529316 | 0.912272339 |
| Ostm1      | 41  | 1.008339324 | 0.908364155 | -0.099975169 | 0.82565097 | 0.912459637 |
| H3f3a      | 137 | 1.162996546 | 1.062219854 | -0.100776693 | 0.82565347 | 0.912459637 |
| Nrxn1      | 7   | 31.5165521  | 32.23824826 | 0.721696161  | 0.8255434  | 0.912459637 |
| Slc25a25   | 129 | 5.986485358 | 6.185408229 | 0.198922871  | 0.82616065 | 0.912524183 |
| Ssb        | 25  | 1.128646757 | 1.314434161 | 0.185787404  | 0.82591583 | 0.912524183 |
| Trmt44     | 17  | 0.668416603 | 0.478598267 | -0.189818336 | 0.82620937 | 0.912524183 |
| Kbtbd12    | 13  | 35.46989978 | 35.71982924 | 0.249929459  | 0.82611652 | 0.912524183 |
| L10001J03R | 12  | 1.420583838 | 1.212287842 | -0.208295995 | 0.82599745 | 0.912524183 |
| Gopc       | 38  | 1.514237055 | 1.434875586 | -0.079361469 | 0.82586488 | 0.912524183 |
| Foxk2      | 156 | 0.9450257   | 0.872521335 | -0.072504365 | 0.82599908 | 0.912524183 |
| Pisd       | 33  | 1.17799614  | 1.423729879 | 0.245733738  | 0.82611564 | 0.912524183 |
| Arhgap1    | 17  | 1.909445286 | 1.920251039 | 0.010805754  | 0.82671675 | 0.913005637 |

|           |    |             |             |              |            |             |
|-----------|----|-------------|-------------|--------------|------------|-------------|
| Nek4      | 23 | 0.876692307 | 0.66535101  | -0.211341297 | 0.82676972 | 0.913005637 |
| Mapk3     | 57 | 1.80332269  | 1.726242816 | -0.077079874 | 0.82691798 | 0.913100641 |
| Fahd1     | 17 | 1.467732264 | 1.731740927 | 0.264008664  | 0.82725213 | 0.91332826  |
| Gjb3      | 15 | 2.828715943 | 2.220795253 | -0.60792069  | 0.82730952 | 0.91332826  |
| Nars      | 21 | 1.536926743 | 1.439870853 | -0.09705589  | 0.82731084 | 0.91332826  |
| Vwa3a     | 3  | 45.97552875 | 46.12772241 | 0.152193659  | 0.82767677 | 0.913562924 |
| Tbc1d32   | 9  | 1.190262441 | 1.432987125 | 0.242724684  | 0.82771017 | 0.913562924 |
| Pelo      | 33 | 1.257445174 | 1.130805318 | -0.126639856 | 0.82767629 | 0.913562924 |
| 10052M02f | 2  | 1.95796101  | 2.630265893 | 0.672304883  | 0.82794559 | 0.913743098 |
| Srsf6     | 72 | 0.907718842 | 0.834600996 | -0.073117846 | 0.82806022 | 0.913743098 |
| Rrp8      | 34 | 1.753549027 | 1.75840824  | 0.004859213  | 0.82802624 | 0.913743098 |
| Mon1b     | 41 | 2.17016046  | 1.927395433 | -0.242765027 | 0.82836551 | 0.914011242 |
| Nsmaf     | 87 | 1.400903941 | 1.27003399  | -0.130869951 | 0.82854423 | 0.914041613 |
| Zfp689    | 28 | 1.084731694 | 1.108405149 | 0.023673454  | 0.828536   | 0.914041613 |
| Cst3      | 10 | 0.751960136 | 0.46087239  | -0.291087746 | 0.82857991 | 0.914041613 |
| Rhbdd2    | 14 | 0.43304606  | 0.539923316 | 0.106877256  | 0.82867294 | 0.914075529 |
| Cntrl     | 45 | 1.652834916 | 1.598264065 | -0.054570851 | 0.82892214 | 0.914144254 |
| Tmem263   | 62 | 1.078663915 | 1.179201019 | 0.100537105  | 0.82887442 | 0.914144254 |
| Mir135b   | 4  | 96.35037576 | 96.83787913 | 0.487503372  | 0.8288197  | 0.914144254 |
| Syt10     | 18 | 59.53643664 | 59.20144525 | -0.334991385 | 0.8292146  | 0.914398066 |
| Anapc10   | 12 | 0.775070731 | 0.981337905 | 0.206267175  | 0.82928153 | 0.914403153 |
| Lppr2     | 23 | 1.930886361 | 1.832249053 | -0.098637308 | 0.82940579 | 0.914459529 |
| Bola1     | 29 | 1.090079605 | 1.393607719 | 0.303528113  | 0.82951961 | 0.914459529 |
| Fbxo9     | 23 | 1.304169111 | 1.297674231 | -0.006494881 | 0.82945841 | 0.914459529 |
| Zdhhc24   | 20 | 2.52012397  | 2.736003762 | 0.215879792  | 0.82961189 | 0.914474313 |
| Bag4      | 55 | 0.925218197 | 1.071775814 | 0.146557617  | 0.82965766 | 0.914474313 |
| Lrrc27    | 7  | 0.965709904 | 0.723892935 | -0.241816968 | 0.82991174 | 0.914616968 |
| Wwtr1     | 42 | 2.388004901 | 2.292285006 | -0.095719895 | 0.82986745 | 0.914616968 |
| Crot      | 38 | 1.994434659 | 1.600019311 | -0.394415347 | 0.83005272 | 0.914645021 |
| Clcn2     | 63 | 1.560569255 | 1.588365885 | 0.02779663   | 0.83006812 | 0.914645021 |
| Rilpl1    | 28 | 9.141272921 | 9.092267988 | -0.049004932 | 0.83012419 | 0.914645021 |
| Tmem125   | 6  | 5.435305435 | 3.830440976 | -1.60486446  | 0.83022857 | 0.914682508 |
| Zfp213    | 17 | 1.475559818 | 1.410285531 | -0.065274287 | 0.83028288 | 0.914682508 |
| Snap29    | 50 | 1.637466425 | 1.526644845 | -0.110821581 | 0.83056133 | 0.914808844 |



|            |     |             |             |              |            |             |
|------------|-----|-------------|-------------|--------------|------------|-------------|
| Mrpl14     | 21  | 0.583819791 | 0.804698584 | 0.220878792  | 0.83051084 | 0.914808844 |
| Aldh6a1    | 19  | 1.680068955 | 1.760728743 | 0.080659788  | 0.83058459 | 0.914808844 |
| Snord55    | 39  | 1.300032009 | 0.977491666 | -0.322540344 | 0.83079342 | 0.914825384 |
| Upk3a      | 6   | 16.94771453 | 16.04863071 | -0.899083822 | 0.83080796 | 0.914825384 |
| Ddx52      | 20  | 1.00177959  | 0.863396987 | -0.138382603 | 0.83084898 | 0.914825384 |
| 110001N08F | 20  | 1.07546255  | 0.851319564 | -0.224142986 | 0.83068037 | 0.914825384 |
| Terf2ip    | 41  | 1.123127774 | 0.929903978 | -0.193223796 | 0.8310533  | 0.914844417 |
| Spdya      | 78  | 1.486920357 | 1.386375649 | -0.100544708 | 0.83104767 | 0.914844417 |
| Lactb2     | 29  | 1.142531082 | 0.927946881 | -0.2145842   | 0.83093011 | 0.914844417 |
| Capza1     | 19  | 1.268858636 | 1.245431936 | -0.0234267   | 0.83138812 | 0.91510327  |
| Snhg3      | 14  | 0.532463456 | 0.772450533 | 0.239987077  | 0.83141317 | 0.91510327  |
| Aqr        | 11  | 0.539516309 | 0.737934551 | 0.198418242  | 0.83163724 | 0.915212609 |
| Ripply2    | 60  | 20.44313718 | 21.80687811 | 1.363740932  | 0.83161964 | 0.915212609 |
| Rassf2     | 27  | 5.893184561 | 5.81860794  | -0.07457662  | 0.83227715 | 0.915436241 |
| Snhg7      | 19  | 0.945651085 | 1.017210287 | 0.071559202  | 0.83209985 | 0.915436241 |
| Phf21b     | 98  | 1.40319568  | 1.537317708 | 0.134122028  | 0.83221341 | 0.915436241 |
| Kifc1      | 15  | 1.565545269 | 1.467110976 | -0.098434293 | 0.83190706 | 0.915436241 |
| Snora17    | 19  | 0.945651085 | 1.017210287 | 0.071559202  | 0.83209985 | 0.915436241 |
| Ndufaf4    | 28  | 1.981246991 | 1.552759531 | -0.428487459 | 0.83213197 | 0.915436241 |
| '00022H01F | 28  | 0.856121503 | 0.802185339 | -0.053936164 | 0.83227145 | 0.915436241 |
| Cyp27b1    | 4   | 31.98329954 | 32.24629729 | 0.262997752  | 0.83265833 | 0.915686828 |
| Ergic1     | 33  | 1.583271746 | 1.420533151 | -0.162738595 | 0.83266234 | 0.915686828 |
| Gpatch1    | 15  | 1.886198517 | 1.389518629 | -0.496679888 | 0.83269218 | 0.915686828 |
| Ptcd1      | 8   | 0.875991272 | 0.863970395 | -0.012020877 | 0.83283048 | 0.915770285 |
| Nploc4     | 60  | 1.41696079  | 1.306307249 | -0.110653541 | 0.83302436 | 0.915777599 |
| Eif3m      | 31  | 1.557029467 | 1.215437431 | -0.341592036 | 0.83300296 | 0.915777599 |
| Tgfb1      | 35  | 1.799731076 | 1.64829541  | -0.151435666 | 0.83289989 | 0.915777599 |
| Polk       | 10  | 2.19592692  | 2.617506491 | 0.421579571  | 0.83316663 | 0.91579679  |
| Chmp5      | 21  | 1.325631805 | 1.505432486 | 0.179800681  | 0.833115   | 0.91579679  |
| Ttc28      | 36  | 1.167888299 | 1.064310154 | -0.103578145 | 0.83324458 | 0.915813868 |
| 110012K16F | 12  | 2.012760673 | 1.4386505   | -0.574110173 | 0.83338008 | 0.915894192 |
| Gbas       | 68  | 1.483321241 | 1.424107014 | -0.059214228 | 0.83349312 | 0.91594983  |
| Midn       | 108 | 1.272427021 | 1.236624859 | -0.035802162 | 0.83369285 | 0.916000573 |
| Hoxb9      | 42  | 20.40739597 | 20.13219403 | -0.275201939 | 0.83363896 | 0.916000573 |

|           |     |             |             |              |            |             |
|-----------|-----|-------------|-------------|--------------|------------|-------------|
| Dhx32     | 57  | 1.149666311 | 1.18634601  | 0.036679699  | 0.83422595 | 0.916000573 |
| Zc3h4     | 72  | 1.599504643 | 1.52564223  | -0.073862413 | 0.83422581 | 0.916000573 |
| Cul2      | 45  | 1.690980417 | 1.686308378 | -0.004672039 | 0.83381637 | 0.916000573 |
| 30056L22F | 30  | 0.621522678 | 0.647666671 | 0.026143993  | 0.83398179 | 0.916000573 |
| Myo19     | 10  | 1.784073543 | 1.860888591 | 0.076815048  | 0.83385471 | 0.916000573 |
| Lrrc8b    | 57  | 1.321619275 | 1.092202477 | -0.229416798 | 0.83409221 | 0.916000573 |
| Idh3g     | 15  | 18.17667142 | 19.02588841 | 0.849216988  | 0.83417354 | 0.916000573 |
| Ice2      | 15  | 1.309951001 | 1.263326474 | -0.046624526 | 0.83396127 | 0.916000573 |
| Gad1os    | 24  | 39.93226146 | 39.82793344 | -0.104328022 | 0.83402513 | 0.916000573 |
| 10004N23F | 2   | 2.51572327  | 2.283105023 | -0.232618248 | 0.83428853 | 0.916000739 |
| Ndufb3    | 3   | 3.510887772 | 3.032456764 | -0.478431008 | 0.8344593  | 0.91605115  |
| Ccdc82    | 7   | 0.336134454 | 0.549450549 | 0.213316096  | 0.83441657 | 0.91605115  |
| Unc13a    | 47  | 0.901778797 | 0.922984265 | 0.021205468  | 0.83461366 | 0.916152069 |
| Zfp169    | 24  | 9.93729224  | 9.920199239 | -0.017093001 | 0.8347419  | 0.916155765 |
| Phf13     | 164 | 1.46882323  | 1.324478029 | -0.144345201 | 0.83471183 | 0.916155765 |
| Psma1     | 15  | 1.125718782 | 1.236128151 | 0.110409369  | 0.83494736 | 0.916251092 |
| 10001K24F | 12  | 0.684223547 | 0.937846069 | 0.253622522  | 0.83495363 | 0.916251092 |
| 32438A13F | 41  | 1.184482235 | 1.337192456 | 0.15271022   | 0.83503357 | 0.916270289 |
| Apoa1bp   | 42  | 1.172284932 | 1.103166091 | -0.069118841 | 0.83535441 | 0.916321265 |
| Nktr      | 67  | 1.091673855 | 1.049697607 | -0.041976248 | 0.83549048 | 0.916321265 |
| Cand1     | 81  | 1.196720457 | 1.128212538 | -0.068507919 | 0.83625293 | 0.916321265 |
| Smad5     | 130 | 3.897907956 | 3.106851036 | -0.79105692  | 0.8367583  | 0.916321265 |
| Dap3      | 105 | 1.312277263 | 1.181882645 | -0.130394618 | 0.83572823 | 0.916321265 |
| Atxn7l3   | 60  | 1.766544699 | 1.992012789 | 0.22546809   | 0.83527945 | 0.916321265 |
| Dctn5     | 8   | 1.66759054  | 0.887853741 | -0.779736799 | 0.83552743 | 0.916321265 |
| Iscu      | 47  | 0.790196258 | 0.800542687 | 0.010346428  | 0.83673964 | 0.916321265 |
| Ttc32     | 12  | 9.001080561 | 7.788106735 | -1.212973825 | 0.83656631 | 0.916321265 |
| 30528A17F | 20  | 1.141014709 | 1.309714091 | 0.168699381  | 0.83548667 | 0.916321265 |
| P2rx7     | 5   | 85.70042285 | 88.22585996 | 2.525437116  | 0.8367899  | 0.916321265 |
| Akap9     | 59  | 1.117765012 | 1.124116712 | 0.006351701  | 0.83575324 | 0.916321265 |
| Zfp60     | 16  | 2.056962094 | 2.234224971 | 0.177262877  | 0.83626578 | 0.916321265 |
| Tsg101    | 25  | 1.553772934 | 1.340199018 | -0.213573916 | 0.83672349 | 0.916321265 |
| Cklf      | 23  | 1.633644862 | 1.25335994  | -0.380284923 | 0.83664943 | 0.916321265 |
| Zfp7      | 17  | 5.790739428 | 4.62783603  | -1.162903399 | 0.83647456 | 0.916321265 |

|          |     |             |             |              |            |             |
|----------|-----|-------------|-------------|--------------|------------|-------------|
| Dmrt2    | 16  | 42.77931707 | 43.18193162 | 0.40261455   | 0.8360768  | 0.916321265 |
| Msmo1    | 45  | 1.044869119 | 1.075346681 | 0.030477562  | 0.83682849 | 0.916321265 |
| Mir8098  | 25  | 1.59353993  | 1.296533948 | -0.297005982 | 0.83589342 | 0.916321265 |
| Tom1     | 27  | 1.406367183 | 1.174371593 | -0.23199559  | 0.83629635 | 0.916321265 |
| Chrm2    | 5   | 54.6031746  | 54.35376416 | -0.249410446 | 0.83600259 | 0.916321265 |
| Cwc15    | 26  | 1.393680354 | 1.433497476 | 0.039817121  | 0.83588207 | 0.916321265 |
| Caprin2  | 28  | 1.688307552 | 1.342000933 | -0.346306619 | 0.83560557 | 0.916321265 |
| Det1     | 27  | 0.816177485 | 0.80963488  | -0.006542605 | 0.83605738 | 0.916321265 |
| Dph2     | 3   | 3.381503812 | 3.098245116 | -0.283258696 | 0.83616538 | 0.916321265 |
| Psma7    | 42  | 0.993252695 | 1.010000805 | 0.016748111  | 0.83545152 | 0.916321265 |
| Kif16b   | 58  | 1.742099031 | 1.501164495 | -0.240934536 | 0.83557087 | 0.916321265 |
| Zw10     | 24  | 1.509761901 | 1.65142501  | 0.141663109  | 0.83643965 | 0.916321265 |
| Slc14a1  | 2   | 54.83146067 | 53.84615385 | -0.985306828 | 0.83724901 | 0.916508677 |
| Zfp572   | 14  | 45.68334689 | 46.22069377 | 0.537346877  | 0.83711161 | 0.916508677 |
| Fndc3b   | 130 | 1.234178061 | 1.162602298 | -0.071575764 | 0.83724948 | 0.916508677 |
| Mir8105  | 68  | 0.87202323  | 0.9657646   | 0.09374137   | 0.83713377 | 0.916508677 |
| Rfx5     | 7   | 1.055970174 | 0.664391019 | -0.391579154 | 0.83759539 | 0.91679696  |
| Cox18    | 41  | 1.367979616 | 1.587143772 | 0.219164157  | 0.83770026 | 0.91679696  |
| Rhob     | 80  | 1.041402848 | 1.053292757 | 0.011889909  | 0.83769218 | 0.91679696  |
| Pan3     | 146 | 1.380323214 | 1.362801765 | -0.017521448 | 0.83784536 | 0.916887373 |
| Smarcc2  | 79  | 1.066123013 | 1.02986095  | -0.036262063 | 0.83868876 | 0.917213344 |
| Vps41    | 31  | 1.52159705  | 1.539108465 | 0.017511416  | 0.83845391 | 0.917213344 |
| Rars     | 25  | 1.974363061 | 1.692015356 | -0.282347705 | 0.83844602 | 0.917213344 |
| Dusp2    | 78  | 2.778976074 | 2.769876134 | -0.00909994  | 0.83874374 | 0.917213344 |
| Basp1    | 28  | 2.18800919  | 1.854889473 | -0.333119717 | 0.83845898 | 0.917213344 |
| Zfp27    | 2   | 47.83183366 | 44.57013575 | -3.261697917 | 0.83869346 | 0.917213344 |
| Kremen1  | 105 | 1.370087664 | 1.218224074 | -0.15186359  | 0.8388933  | 0.917213344 |
| Tars     | 17  | 2.389179602 | 2.135128703 | -0.254050899 | 0.83861545 | 0.917213344 |
| Tmcc1    | 46  | 1.333677681 | 1.281637786 | -0.052039895 | 0.83880761 | 0.917213344 |
| Arhgef12 | 130 | 1.164496986 | 0.958863076 | -0.205633911 | 0.83823001 | 0.917213344 |
| Acap2    | 29  | 0.811411171 | 0.991200466 | 0.179789295  | 0.83852113 | 0.917213344 |
| E2f2     | 23  | 0.986448959 | 0.997076783 | 0.010627824  | 0.83884137 | 0.917213344 |
| Dnajc13  | 52  | 1.030627217 | 0.969947911 | -0.060679306 | 0.83914316 | 0.917320904 |
| Thtpa    | 6   | 2.084020048 | 2.116629701 | 0.032609653  | 0.83906113 | 0.917320904 |

|           |     |             |             |              |            |             |
|-----------|-----|-------------|-------------|--------------|------------|-------------|
| Trim32    | 3   | 5.158730159 | 5.612244898 | 0.453514739  | 0.83919159 | 0.917320904 |
| Iffo1     | 30  | 2.452069201 | 2.130395634 | -0.321673567 | 0.83924173 | 0.917320904 |
| Chd9      | 15  | 1.30737082  | 0.917865379 | -0.389505442 | 0.83992296 | 0.917997135 |
| Nudcd2    | 15  | 0.967475241 | 0.68849877  | -0.278976471 | 0.84006131 | 0.91806262  |
| Stk10     | 49  | 1.824256346 | 2.071929216 | 0.24767287   | 0.8402957  | 0.91806262  |
| Rassf3    | 37  | 1.610308745 | 1.667954551 | 0.057645806  | 0.84022694 | 0.91806262  |
| Ablim3    | 43  | 2.892500589 | 2.907148157 | 0.014647568  | 0.8402736  | 0.91806262  |
| Naga      | 15  | 1.699549373 | 1.621839651 | -0.077709722 | 0.84029157 | 0.91806262  |
| Lynx1     | 6   | 1.586719732 | 2.265795207 | 0.679075475  | 0.84036867 | 0.918073992 |
| Hyi       | 16  | 0.746804017 | 0.588767985 | -0.158036033 | 0.84056025 | 0.918101179 |
| Oxr1      | 142 | 1.339901983 | 1.364922327 | 0.025020344  | 0.84064382 | 0.918101179 |
| Fhl4      | 8   | 2.881978806 | 3.130757985 | 0.248779179  | 0.8405837  | 0.918101179 |
| Comp      | 8   | 9.824229708 | 10.04175674 | 0.217527028  | 0.8406345  | 0.918101179 |
| 00009J06R | 20  | 1.003734469 | 1.005269072 | 0.001534603  | 0.84078574 | 0.918187834 |
| Stat3     | 58  | 1.322974292 | 1.349527544 | 0.026553252  | 0.84100849 | 0.918294409 |
| Ank       | 119 | 1.14321421  | 0.96535199  | -0.17786222  | 0.84100715 | 0.918294409 |
| Npat      | 36  | 1.090102784 | 0.997980348 | -0.092122436 | 0.84138911 | 0.918641648 |
| Arfgef3   | 28  | 5.212718621 | 6.117881144 | 0.905162522  | 0.84160981 | 0.918814247 |
| Fam124a   | 71  | 5.720161976 | 6.662917784 | 0.942755808  | 0.84173322 | 0.918844325 |
| Pcbp4     | 42  | 1.527763453 | 1.386607265 | -0.141156188 | 0.84176259 | 0.918844325 |
| Fam175a   | 43  | 1.104833152 | 1.19445119  | 0.089618038  | 0.84191159 | 0.918870262 |
| Notch4    | 4   | 15.5995935  | 15.86001248 | 0.260418987  | 0.84189027 | 0.918870262 |
| Ptbp3     | 95  | 1.087328385 | 1.085271208 | -0.002057178 | 0.84199867 | 0.918896955 |
| Kars      | 5   | 3.052358243 | 2.685496112 | -0.366862131 | 0.84211391 | 0.918954379 |
| Urb1      | 14  | 2.284441782 | 2.130883716 | -0.153558066 | 0.84244113 | 0.919243096 |
| Klf10     | 50  | 1.499166985 | 1.325615839 | -0.173551146 | 0.84286335 | 0.919635419 |
| Inpp4a    | 29  | 1.324979652 | 1.658692941 | 0.333713289  | 0.84298855 | 0.919703639 |
| Dcps      | 6   | 1.02124183  | 0.996902826 | -0.024339004 | 0.84331438 | 0.919990721 |
| AI597479  | 32  | 1.475310534 | 1.297090512 | -0.178220023 | 0.84346351 | 0.920078605 |
| Jmjd4     | 5   | 0.526315789 | 0.779220779 | 0.25290499   | 0.84352034 | 0.920078605 |
| Scyl3     | 63  | 1.558263676 | 1.688398104 | 0.130134428  | 0.84364035 | 0.920141105 |
| Sgpl1     | 71  | 1.342327031 | 1.128150895 | -0.214176137 | 0.84374373 | 0.920185468 |
| Ccnc      | 32  | 1.634057653 | 1.584541813 | -0.04951584  | 0.84401563 | 0.920413593 |
| Rangrf    | 28  | 9.284488696 | 7.828938156 | -1.45555054  | 0.84413533 | 0.920447018 |

|            |     |             |             |              |            |             |
|------------|-----|-------------|-------------|--------------|------------|-------------|
| Rdh10      | 182 | 1.212919945 | 1.229616603 | 0.016696658  | 0.84417173 | 0.920447018 |
| Mlycd      | 87  | 1.096279436 | 1.071139826 | -0.02513961  | 0.84451735 | 0.920687038 |
| Nars2      | 17  | 1.309613917 | 0.800845577 | -0.50876834  | 0.84451599 | 0.920687038 |
| Rplp1      | 16  | 0.61007628  | 0.667230398 | 0.057154118  | 0.8448323  | 0.92096198  |
| Reep3      | 116 | 1.349519736 | 1.13510808  | -0.214411656 | 0.84505012 | 0.921091265 |
| Ppid       | 56  | 1.40204834  | 1.414576961 | 0.012528622  | 0.84507644 | 0.921091265 |
| Klhl11     | 49  | 1.243190644 | 1.013084391 | -0.230106253 | 0.84544939 | 0.921331286 |
| Slc20a1    | 88  | 1.334510597 | 1.292487947 | -0.04202265  | 0.84550259 | 0.921331286 |
| Surf2      | 16  | 1.342028114 | 1.474328703 | 0.132300589  | 0.84540703 | 0.921331286 |
| Pik3r3     | 32  | 2.282272083 | 1.979132732 | -0.303139351 | 0.8455478  | 0.921331286 |
| Pi4ka      | 32  | 0.914844668 | 0.764958641 | -0.149886027 | 0.84571049 | 0.921440139 |
| Fam173b    | 10  | 0.871271586 | 0.690639269 | -0.180632316 | 0.84600987 | 0.921629459 |
| Psmc6      | 58  | 1.216471745 | 1.187720037 | -0.028751708 | 0.84595351 | 0.921629459 |
| Rad18      | 52  | 7.962033521 | 8.091930608 | 0.129897086  | 0.8465913  | 0.921790258 |
| Pdcd7      | 67  | 5.14886213  | 4.98477881  | -0.16408332  | 0.84660693 | 0.921790258 |
| Pomk       | 5   | 3.074251166 | 3.160140611 | 0.085889445  | 0.84650238 | 0.921790258 |
| Cfap61     | 16  | 0.944472791 | 0.879144758 | -0.065328033 | 0.84642164 | 0.921790258 |
| Tab1       | 49  | 1.494056285 | 1.337033496 | -0.15702279  | 0.84644173 | 0.921790258 |
| Rfc1       | 35  | 1.181132385 | 1.092932514 | -0.088199871 | 0.84647637 | 0.921790258 |
| Foxl2      | 88  | 13.49983323 | 14.24298801 | 0.743154776  | 0.84672284 | 0.921790258 |
| Tmppe      | 74  | 1.305176928 | 1.115182074 | -0.189994854 | 0.84666821 | 0.921790258 |
| Samd14     | 54  | 1.914777374 | 2.054172852 | 0.139395478  | 0.84652056 | 0.921790258 |
| Cmtm6      | 37  | 0.91200054  | 0.983261154 | 0.071260614  | 0.84682539 | 0.921833517 |
| Rusc1      | 53  | 11.06627522 | 11.30359529 | 0.237320073  | 0.84695778 | 0.92187439  |
| Heca       | 86  | 1.106655003 | 1.033495778 | -0.073159225 | 0.84698859 | 0.92187439  |
| Pcdhgb7    | 7   | 68.09710609 | 68.14491394 | 0.047807854  | 0.84724852 | 0.922088908 |
| Thap6      | 20  | 0.842189964 | 0.867768759 | 0.025578795  | 0.84740343 | 0.922189103 |
| 130462N17F | 97  | 1.040531863 | 0.928771913 | -0.11175995  | 0.84789575 | 0.922656456 |
| Rab8a      | 49  | 1.69085707  | 1.711328972 | 0.020471902  | 0.84815393 | 0.922868959 |
| Vdac1      | 36  | 1.063320573 | 1.051317341 | -0.012003232 | 0.84837165 | 0.922911285 |
| Jmjd8      | 7   | 15.86615736 | 15.46433837 | -0.401818995 | 0.84850576 | 0.922911285 |
| Pnn        | 57  | 1.543806034 | 1.489709771 | -0.054096263 | 0.8485073  | 0.922911285 |
| Golga2     | 13  | 2.093026296 | 1.649631147 | -0.443395149 | 0.84841472 | 0.922911285 |
| Stt3a      | 14  | 0.288879059 | 0.327205118 | 0.038326059  | 0.84847243 | 0.922911285 |

|           |     |             |             |              |            |             |
|-----------|-----|-------------|-------------|--------------|------------|-------------|
| Eml6      | 34  | 1.62000139  | 1.684492917 | 0.064491527  | 0.84857137 | 0.922912556 |
| Rnf169    | 58  | 1.241769935 | 1.051870424 | -0.189899511 | 0.84869358 | 0.922977068 |
| Mir3960   | 48  | 1.420304052 | 1.489994368 | 0.069690316  | 0.84876315 | 0.922984327 |
| Sbno2     | 57  | 0.956553984 | 1.121275841 | 0.164721857  | 0.84889087 | 0.922986413 |
| Fkbp15    | 20  | 1.210948216 | 1.211060069 | 0.000111853  | 0.84888739 | 0.922986413 |
| Hmg20b    | 82  | 1.126867852 | 1.066806781 | -0.060061071 | 0.84897279 | 0.923007088 |
| Twsg1     | 41  | 1.223101895 | 1.202364587 | -0.020737308 | 0.84920194 | 0.923187825 |
| Snord89   | 1   | 99.32885906 | 99.12280702 | -0.206052043 | 0.84948609 | 0.92323395  |
| Sh3pxd2b  | 47  | 0.945863597 | 0.987848517 | 0.041984921  | 0.84970365 | 0.92323395  |
| Rab11fip2 | 84  | 1.737976546 | 1.582253219 | -0.155723327 | 0.8496501  | 0.92323395  |
| Sf3b6     | 29  | 2.691281604 | 3.021921281 | 0.330639677  | 0.8497477  | 0.92323395  |
| AY074887  | 37  | 1.329384183 | 1.272896514 | -0.056487669 | 0.84942914 | 0.92323395  |
| Zfp41     | 79  | 1.825265822 | 1.747417881 | -0.077847942 | 0.84963479 | 0.92323395  |
| Spsb3     | 26  | 28.64355607 | 27.93140873 | -0.71214734  | 0.84932047 | 0.92323395  |
| 21506M07f | 3   | 80.68965517 | 79.61234177 | -1.0773134   | 0.84952694 | 0.92323395  |
| Ypel5     | 58  | 1.483355504 | 1.251564259 | -0.231791245 | 0.84999118 | 0.923293406 |
| Gpsm1     | 34  | 1.821009389 | 1.659851541 | -0.161157849 | 0.84998394 | 0.923293406 |
| Crk       | 79  | 1.428852211 | 1.2435379   | -0.185314311 | 0.84998873 | 0.923293406 |
| Siah1a    | 131 | 1.00236283  | 1.135820382 | 0.133457552  | 0.85023599 | 0.923490962 |
| Fam117b   | 41  | 1.478043992 | 1.292255833 | -0.185788159 | 0.85046123 | 0.923608424 |
| Kmt2d     | 148 | 1.57599297  | 1.529309906 | -0.046683064 | 0.85047002 | 0.923608424 |
| Ern2      | 3   | 46.13128867 | 46.59266112 | 0.461372443  | 0.85055397 | 0.923631246 |
| Shank2    | 56  | 54.56902201 | 54.39774538 | -0.17127663  | 0.85062197 | 0.923636731 |
| Zfp454    | 4   | 33.66567879 | 31.84053623 | -1.825142556 | 0.85075588 | 0.923713787 |
| Zfp90     | 36  | 1.457284879 | 1.539275    | 0.081990121  | 0.85092065 | 0.923813036 |
| Tm2d2     | 27  | 1.508467505 | 1.424262154 | -0.084205351 | 0.8509732  | 0.923813036 |
| Slx1b     | 37  | 1.47839199  | 1.343345719 | -0.135046272 | 0.85130536 | 0.92410526  |
| Pet117    | 2   | 0.961538462 | 1.25        | 0.288461538  | 0.85140998 | 0.924150457 |
| Tbp       | 45  | 0.999480702 | 1.166471448 | 0.166990746  | 0.851557   | 0.92424167  |
| Uimc1     | 38  | 1.184018425 | 1.126169277 | -0.057849148 | 0.85177573 | 0.924410697 |
| Pip5k1b   | 119 | 1.070499636 | 1.062954715 | -0.007544921 | 0.85197336 | 0.924496934 |
| Mbd4      | 17  | 1.409271692 | 1.226824087 | -0.182447605 | 0.85198119 | 0.924496934 |
| 00026H17F | 19  | 1.706747144 | 2.107890427 | 0.401143283  | 0.85212531 | 0.924584942 |
| Zfp668    | 29  | 1.031316083 | 1.619040944 | 0.587724862  | 0.85287876 | 0.925128833 |

|            |     |             |             |              |            |             |
|------------|-----|-------------|-------------|--------------|------------|-------------|
| Gm6297     | 73  | 1.616473371 | 1.43315618  | -0.183317191 | 0.85278176 | 0.925128833 |
| Adk        | 40  | 1.253713719 | 0.938707987 | -0.315005731 | 0.8528595  | 0.925128833 |
| Tbrg1      | 26  | 1.103560128 | 1.390368252 | 0.286808124  | 0.85279972 | 0.925128833 |
| Cfap36     | 32  | 1.556075079 | 1.598499352 | 0.042424273  | 0.85300542 | 0.925197834 |
| Ankrd26    | 14  | 1.612748982 | 1.70791031  | 0.095161328  | 0.85326887 | 0.925415186 |
| Taf4a      | 53  | 0.994406225 | 1.1853683   | 0.190962075  | 0.85348877 | 0.925585266 |
| Rhod       | 14  | 2.445595747 | 1.86511667  | -0.580479077 | 0.85373238 | 0.925676391 |
| Tmem120a   | 23  | 1.57867197  | 1.304162498 | -0.274509471 | 0.85376205 | 0.925676391 |
| Tmem80     | 27  | 0.921653364 | 0.823397924 | -0.09825544  | 0.85372344 | 0.925676391 |
| Hdac1      | 47  | 1.339653371 | 1.291170322 | -0.048483049 | 0.85436409 | 0.926260701 |
| Rb1        | 152 | 1.246942823 | 1.441599096 | 0.194656273  | 0.85443162 | 0.92626548  |
| Trim39     | 97  | 1.540219298 | 1.443941966 | -0.096277332 | 0.85457642 | 0.926285596 |
| Rpp38      | 8   | 2.415980066 | 1.969501102 | -0.446478963 | 0.85453425 | 0.926285596 |
| Zdhhc17    | 115 | 1.221146817 | 1.098107789 | -0.123039028 | 0.85464839 | 0.92629518  |
| Smpd4      | 9   | 1.558277558 | 1.326737413 | -0.231540145 | 0.85476784 | 0.926356228 |
| Anapc16    | 9   | 0.707451115 | 1.038945655 | 0.331494541  | 0.85508946 | 0.926636339 |
| Tube1      | 26  | 0.981319401 | 0.971402585 | -0.009916816 | 0.85565575 | 0.926989616 |
| Ssr4       | 11  | 17.58196383 | 18.66530438 | 1.083340553  | 0.85572211 | 0.926989616 |
| Plk2       | 85  | 1.846099541 | 1.741279184 | -0.104820357 | 0.85557086 | 0.926989616 |
| Ckap4      | 132 | 1.093768131 | 1.087180969 | -0.006587162 | 0.85558402 | 0.926989616 |
| Usp49      | 57  | 1.272514357 | 1.236430176 | -0.036084181 | 0.85573132 | 0.926989616 |
| Tmem158    | 70  | 1.241984493 | 1.121794411 | -0.120190082 | 0.85590245 | 0.927106554 |
| '00019A02F | 2   | 96.22082625 | 96.43077397 | 0.209947721  | 0.85623807 | 0.927401638 |
| Cysrt1     | 7   | 38.37182663 | 38.44392632 | 0.072099688  | 0.85634249 | 0.927446279 |
| Hacd2      | 36  | 1.171194866 | 1.375949594 | 0.204754728  | 0.85645114 | 0.9274955   |
| Rpl27      | 45  | 1.592305166 | 1.535593014 | -0.056712152 | 0.85669163 | 0.927565274 |
| Mrps18a    | 39  | 1.533043837 | 1.631593748 | 0.098549912  | 0.8567052  | 0.927565274 |
| Sec13      | 10  | 1.168632886 | 1.68494638  | 0.516313494  | 0.8566969  | 0.927565274 |
| Ldha       | 25  | 1.076944714 | 0.964908967 | -0.112035746 | 0.85696732 | 0.927712171 |
| Rmdn3      | 50  | 1.605596244 | 1.614654402 | 0.009058158  | 0.85695973 | 0.927712171 |
| Ascc1      | 13  | 0.777661059 | 0.985356184 | 0.207695126  | 0.85714989 | 0.927841356 |
| Zgpat      | 41  | 1.293273512 | 1.604454029 | 0.311180517  | 0.85736091 | 0.927884929 |
| Usp31      | 82  | 1.187042339 | 1.119978957 | -0.067063383 | 0.85733799 | 0.927884929 |
| Erc4       | 36  | 0.991287162 | 1.152532579 | 0.161245417  | 0.85737984 | 0.927884929 |

|            |    |             |             |              |            |             |
|------------|----|-------------|-------------|--------------|------------|-------------|
| Atr        | 44 | 0.736624212 | 0.788176256 | 0.051552044  | 0.8578975  | 0.928376687 |
| Ccnt2      | 38 | 1.17738707  | 1.198628657 | 0.021241587  | 0.85814212 | 0.928504463 |
| Vps52      | 43 | 1.400000103 | 1.371799165 | -0.028200938 | 0.85813146 | 0.928504463 |
| L30036L24F | 38 | 0.990230183 | 0.994739237 | 0.004509054  | 0.85823536 | 0.928536875 |
| Rpl9       | 17 | 1.265358952 | 1.154688172 | -0.11067078  | 0.85834352 | 0.928540729 |
| Polh       | 10 | 1.658105219 | 1.78625118  | 0.128145961  | 0.85836548 | 0.928540729 |
| Dynll2     | 74 | 1.009674984 | 0.918318426 | -0.091356558 | 0.858459   | 0.928573449 |
| Vamp1      | 15 | 0.771484718 | 0.669114589 | -0.102370129 | 0.85863949 | 0.928636596 |
| Atp5b      | 36 | 1.474108019 | 1.495166311 | 0.021058292  | 0.85864395 | 0.928636596 |
| Oscp1      | 42 | 5.640146811 | 4.548826832 | -1.091319979 | 0.85885192 | 0.928784725 |
| Zbtb7a     | 83 | 1.505471426 | 1.305119954 | -0.200351472 | 0.8589075  | 0.928784725 |
| Tnfaip8    | 6  | 1.088206438 | 1.215460427 | 0.127253989  | 0.85902727 | 0.92880351  |
| Lars       | 10 | 2.467985533 | 2.100483855 | -0.367501678 | 0.85905147 | 0.92880351  |
| Snx24      | 97 | 1.240002925 | 1.147892965 | -0.09210996  | 0.85937136 | 0.929080918 |
| Chuk       | 48 | 1.232678903 | 1.282885849 | 0.050206946  | 0.85952543 | 0.929179033 |
| Usp36      | 30 | 0.385620746 | 0.443847246 | 0.0582265    | 0.85964015 | 0.929182452 |
| Safb2      | 77 | 0.909288632 | 0.820142507 | -0.089146125 | 0.85965524 | 0.929182452 |
| Plxnd1     | 76 | 1.631553047 | 1.831983922 | 0.200430876  | 0.85976301 | 0.929230489 |
| Stk38l     | 49 | 1.242562098 | 1.218655708 | -0.023906389 | 0.86003534 | 0.929456369 |
| Abra       | 5  | 74.77996547 | 71.79039025 | -2.989575215 | 0.8602592  | 0.929629829 |
| Fkrp       | 78 | 1.829552457 | 1.607261147 | -0.22229131  | 0.86038053 | 0.929692478 |
| Pon2       | 35 | 1.277337616 | 1.295157912 | 0.017820296  | 0.8611522  | 0.93028351  |
| Tmem240    | 61 | 1.371728798 | 1.472805588 | 0.10107679   | 0.86118108 | 0.93028351  |
| Alpk3      | 24 | 50.79416924 | 50.2700873  | -0.524081936 | 0.86100115 | 0.93028351  |
| Rpl4       | 10 | 0.817401258 | 1.101904032 | 0.284502774  | 0.86111309 | 0.93028351  |
| '00034P13F | 36 | 1.352349818 | 0.981959319 | -0.370390499 | 0.86130556 | 0.930349487 |
| Cwf19l1    | 11 | 0.998997881 | 1.160959935 | 0.161962054  | 0.86141289 | 0.93039693  |
| Cacfd1     | 35 | 1.161725144 | 1.399855474 | 0.23813033   | 0.86154673 | 0.930417902 |
| '00066M21f | 58 | 1.324939838 | 1.178793889 | -0.14614595  | 0.86156394 | 0.930417902 |
| Actr1b     | 29 | 1.216918797 | 1.333578434 | 0.116659638  | 0.86162252 | 0.930417902 |
| Rabif      | 42 | 1.43609096  | 1.244569984 | -0.191520976 | 0.86175886 | 0.930496658 |
| Spata1     | 78 | 1.269753359 | 1.067225835 | -0.202527523 | 0.86196055 | 0.930645948 |
| Six5       | 39 | 1.190635098 | 1.253377877 | 0.062742778  | 0.86231241 | 0.930888861 |
| Chchd7     | 50 | 1.117258802 | 1.139540733 | 0.022281931  | 0.86229658 | 0.930888861 |



|           |     |             |             |              |            |             |
|-----------|-----|-------------|-------------|--------------|------------|-------------|
| Ankrd12   | 112 | 1.2274419   | 1.27528999  | 0.04784809   | 0.8624825  | 0.930935508 |
| Carm1     | 147 | 1.091809332 | 1.085476105 | -0.006333227 | 0.86242389 | 0.930935508 |
| Clip2     | 56  | 1.308161837 | 1.605747008 | 0.297585171  | 0.86266746 | 0.93104653  |
| Klhl2     | 115 | 0.982123346 | 0.97745731  | -0.004666035 | 0.86271226 | 0.93104653  |
| Gm11627   | 2   | 18.91524461 | 19.56601355 | 0.650768943  | 0.86315131 | 0.931445239 |
| Nudt9     | 48  | 1.651619206 | 1.977937142 | 0.326317935  | 0.86320865 | 0.931445239 |
| Kpnb1     | 121 | 1.23962821  | 1.28292064  | 0.04329243   | 0.86328106 | 0.931454875 |
| Bnip2     | 62  | 1.616070015 | 1.555528145 | -0.060541871 | 0.86357037 | 0.931698521 |
| Spred1    | 114 | 0.877117444 | 0.864105419 | -0.013012025 | 0.86371503 | 0.931786083 |
| Tfam      | 46  | 1.386619241 | 1.100774194 | -0.285845048 | 0.86383981 | 0.931852192 |
| Ccdc88c   | 83  | 1.144676978 | 1.156038222 | 0.011361243  | 0.86396132 | 0.931914762 |
| Uckl1     | 31  | 1.275428945 | 1.21172504  | -0.063703905 | 0.86453081 | 0.932254934 |
| Ndufaf5   | 32  | 1.490328312 | 1.628692026 | 0.138363714  | 0.86448435 | 0.932254934 |
| Casp2     | 9   | 1.125033502 | 0.954074621 | -0.170958881 | 0.86448062 | 0.932254934 |
| Yipf5     | 39  | 1.716395826 | 2.027625157 | 0.311229332  | 0.86445721 | 0.932254934 |
| Cops4     | 19  | 1.466285792 | 1.042696515 | -0.423589277 | 0.86460406 | 0.932265413 |
| Pter      | 1   | 4.166666667 | 4.451038576 | 0.284371909  | 0.86477544 | 0.932381685 |
| Gm13375   | 125 | 0.990583629 | 1.06345695  | 0.072873322  | 0.86485197 | 0.932395695 |
| Mgat3     | 132 | 1.883545616 | 1.729691106 | -0.15385451  | 0.86506728 | 0.932422306 |
| Polr2j    | 22  | 0.912833632 | 1.079212812 | 0.16637918   | 0.86504881 | 0.932422306 |
| Rrbp1     | 108 | 0.857666557 | 0.875688299 | 0.018021742  | 0.86498352 | 0.932422306 |
| Tm9sf1    | 75  | 1.072594639 | 1.090007936 | 0.017413297  | 0.86518282 | 0.932478346 |
| Lvrn      | 17  | 51.54075084 | 51.96946939 | 0.428718549  | 0.86529316 | 0.932528772 |
| Rnf121    | 15  | 1.659505146 | 1.413392386 | -0.246112759 | 0.8653948  | 0.932569819 |
| Ngdn      | 20  | 2.18024784  | 2.124575786 | -0.055672054 | 0.86591288 | 0.933059599 |
| Ddb1      | 7   | 1.372410059 | 2.202635979 | 0.83022592   | 0.86607009 | 0.933112636 |
| Fam60a    | 15  | 0.659356288 | 0.602895381 | -0.056460907 | 0.86608928 | 0.933112636 |
| Nkiras2   | 23  | 1.413888616 | 1.494302045 | 0.080413429  | 0.86625063 | 0.933128697 |
| BC027231  | 58  | 1.730839066 | 1.726583366 | -0.004255699 | 0.86635855 | 0.933128697 |
| Lrp8      | 88  | 1.135604011 | 1.124637822 | -0.010966189 | 0.86632509 | 0.933128697 |
| Ipo4      | 13  | 0.706502406 | 1.064234848 | 0.357732442  | 0.86635442 | 0.933128697 |
| Rpn1      | 42  | 1.222730518 | 1.076106622 | -0.146623896 | 0.86670403 | 0.933239967 |
| Arhgap9   | 4   | 49.15702599 | 49.41336869 | 0.256342696  | 0.86665953 | 0.933239967 |
| D10Jhu81e | 20  | 1.669821727 | 1.512848593 | -0.156973135 | 0.86671625 | 0.933239967 |

|            |     |             |             |              |            |             |
|------------|-----|-------------|-------------|--------------|------------|-------------|
| Tmem87b    | 30  | 2.058241664 | 1.744424556 | -0.313817108 | 0.86666177 | 0.933239967 |
| Ppa2       | 78  | 3.195829058 | 2.951371473 | -0.244457585 | 0.86710015 | 0.933267374 |
| Imp4       | 8   | 2.658680119 | 1.966239668 | -0.692440452 | 0.86711625 | 0.933267374 |
| Atpaf1     | 45  | 1.490726187 | 1.404364541 | -0.086361646 | 0.86696623 | 0.933267374 |
| Inpp5f     | 34  | 1.686517715 | 1.6599564   | -0.026561315 | 0.86711803 | 0.933267374 |
| Wbscr16    | 54  | 1.300666502 | 1.207099601 | -0.093566901 | 0.86701327 | 0.933267374 |
| Btbd6      | 44  | 1.017178287 | 0.956311056 | -0.060867232 | 0.86712331 | 0.933267374 |
| Rgs4       | 2   | 8.941176471 | 8.580123547 | -0.361052924 | 0.86750871 | 0.933271464 |
| Mllt6      | 87  | 1.548856905 | 1.184117973 | -0.364738932 | 0.86733738 | 0.933271464 |
| Lrit3      | 1   | 98.97959184 | 99.19354839 | 0.21395655   | 0.86740163 | 0.933271464 |
| Cep162     | 10  | 1.702637424 | 1.891630115 | 0.188992691  | 0.86742516 | 0.933271464 |
| Rsb1l      | 69  | 0.893561957 | 1.033736212 | 0.140174255  | 0.86750762 | 0.933271464 |
| Fra10ac1   | 28  | 1.125129855 | 0.942360846 | -0.182769008 | 0.86730423 | 0.933271464 |
| Amd2       | 2   | 1.094890511 | 1.307189542 | 0.212299032  | 0.86762032 | 0.933323116 |
| BC068281   | 2   | 1.5625      | 1.265822785 | -0.296677215 | 0.86777725 | 0.933423502 |
| Riok1      | 27  | 1.690278325 | 1.864793159 | 0.174514834  | 0.86805692 | 0.933655886 |
| Dlg1       | 98  | 4.428742971 | 4.082645375 | -0.346097596 | 0.86824886 | 0.93365703  |
| h33424G05F | 4   | 92.33174059 | 91.68643264 | -0.645307949 | 0.86822883 | 0.93365703  |
| Ddx27      | 13  | 2.094683818 | 1.641181203 | -0.453502615 | 0.86815833 | 0.93365703  |
| Tango6     | 32  | 1.27604957  | 1.468114586 | 0.192065016  | 0.86850492 | 0.933863938 |
| Nod1       | 35  | 1.343850568 | 1.322502517 | -0.021348052 | 0.86860773 | 0.933906057 |
| Mir124a-1  | 6   | 36.05818024 | 36.0628747  | 0.004694464  | 0.86871888 | 0.933916589 |
| Fbxl17     | 129 | 1.273482997 | 1.310078874 | 0.036595877  | 0.86874482 | 0.933916589 |
| Eif3g      | 48  | 1.384108844 | 1.570820203 | 0.186711359  | 0.86910968 | 0.934240376 |
| R3hdm4     | 32  | 2.012509481 | 2.11196226  | 0.099452778  | 0.86927139 | 0.934345762 |
| Stim1      | 37  | 1.568075874 | 1.301766046 | -0.266309828 | 0.8693492  | 0.934360961 |
| Mir137     | 3   | 16.26904687 | 16.81455191 | 0.545505039  | 0.86965094 | 0.934616812 |
| Mgrn1      | 66  | 1.421702261 | 1.432615626 | 0.010913365  | 0.8698252  | 0.934735624 |
| Lrrc51     | 50  | 1.466530954 | 1.371581959 | -0.094948996 | 0.87045954 | 0.935348803 |
| Zdhhc21    | 79  | 1.210078216 | 1.083499844 | -0.126578372 | 0.87096767 | 0.935757768 |
| Trim37     | 84  | 1.382743027 | 1.359398954 | -0.023344073 | 0.87094414 | 0.935757768 |
| Kcna4      | 14  | 39.10615717 | 40.5388528  | 1.432695633  | 0.87109912 | 0.935830478 |
| Trmt5      | 24  | 2.036800314 | 2.03665223  | -0.000148084 | 0.87118711 | 0.935856491 |
| '30420D15F | 30  | 4.871819191 | 5.206626086 | 0.334806896  | 0.87165939 | 0.93629528  |

|            |    |             |             |              |            |             |
|------------|----|-------------|-------------|--------------|------------|-------------|
| i10020H08F | 6  | 1.115249328 | 0.89676206  | -0.218487268 | 0.87177057 | 0.93634617  |
| i30452B06F | 35 | 4.423477087 | 5.83944518  | 1.415968093  | 0.87213108 | 0.93666482  |
| Atg9a      | 26 | 1.051851613 | 1.140373443 | 0.08852183   | 0.87313214 | 0.937259771 |
| Aldh9a1    | 42 | 1.489702778 | 1.479928068 | -0.009774711 | 0.87310315 | 0.937259771 |
| Elk4       | 67 | 1.056868092 | 0.862266286 | -0.194601806 | 0.87282084 | 0.937259771 |
| Kdelc2     | 42 | 5.575134264 | 5.654700828 | 0.079566564  | 0.87305194 | 0.937259771 |
| Parp1      | 16 | 1.297228398 | 1.339835308 | 0.04260691   | 0.87275987 | 0.937259771 |
| Cnpy3      | 29 | 1.377998527 | 1.210514155 | -0.167484371 | 0.87304571 | 0.937259771 |
| Pmf1       | 10 | 1.301760497 | 1.146649724 | -0.155110773 | 0.87294725 | 0.937259771 |
| Cyth3      | 59 | 1.408224084 | 1.528220772 | 0.119996687  | 0.87335857 | 0.937434246 |
| .10002H16F | 37 | 1.239330865 | 1.516675311 | 0.277344446  | 0.87356428 | 0.937586467 |
| Eny2       | 12 | 1.03501055  | 0.830400251 | -0.204610299 | 0.87382235 | 0.937794868 |
| Pf4        | 9  | 58.09083867 | 57.89038371 | -0.200454952 | 0.87405648 | 0.937955097 |
| Tigd5      | 69 | 1.514069793 | 1.366492235 | -0.147577558 | 0.87409949 | 0.937955097 |
| Ube2v2     | 40 | 1.078139979 | 1.187402751 | 0.109262772  | 0.87441097 | 0.938152126 |
| Cep57      | 29 | 1.353826412 | 1.290483764 | -0.063342648 | 0.87435053 | 0.938152126 |
| Gdpd1      | 3  | 2.346597065 | 1.687382298 | -0.659214767 | 0.87482504 | 0.93852776  |
| Echdc3     | 18 | 8.031628241 | 8.488846971 | 0.45721873   | 0.87501965 | 0.938530688 |
| Clk1       | 22 | 0.900213075 | 0.926294117 | 0.026081042  | 0.87489607 | 0.938530688 |
| Slc26a11   | 18 | 2.191038077 | 1.750309119 | -0.440728957 | 0.87495619 | 0.938530688 |
| Mapk8ip3   | 26 | 1.346523516 | 1.166056249 | -0.180467267 | 0.87520513 | 0.938661022 |
| Hat1       | 20 | 1.290251284 | 1.116265486 | -0.173985798 | 0.87541713 | 0.938819777 |
| Zc3h7a     | 42 | 0.595868663 | 0.729169292 | 0.133300628  | 0.87576    | 0.939118838 |
| Nmt1       | 10 | 1.644693768 | 0.984606211 | -0.660087557 | 0.87606705 | 0.939221809 |
| Myo15      | 1  | 91.42857143 | 90.76923077 | -0.659340659 | 0.87607976 | 0.939221809 |
| Ftl1       | 19 | 2.292331627 | 1.598831771 | -0.693499855 | 0.87624005 | 0.939221809 |
| Ucp1       | 5  | 14.31758953 | 13.19540871 | -1.122180812 | 0.87613691 | 0.939221809 |
| Mapk8      | 98 | 1.083037718 | 0.93179111  | -0.151246607 | 0.8762096  | 0.939221809 |
| Mir5627    | 18 | 0.65668294  | 0.862239656 | 0.205556716  | 0.87619149 | 0.939221809 |
| Bphl       | 32 | 1.075224441 | 1.138488037 | 0.063263596  | 0.87668014 | 0.939428703 |
| Dlec1      | 20 | 1.981846734 | 2.738508976 | 0.756662242  | 0.87664968 | 0.939428703 |
| Atic       | 42 | 1.510701503 | 1.603968941 | 0.093267438  | 0.87668916 | 0.939428703 |
| Cap1       | 29 | 2.069523542 | 1.765668179 | -0.303855363 | 0.8765563  | 0.939428703 |
| Arpc4      | 43 | 1.437360094 | 1.313328467 | -0.124031627 | 0.87680595 | 0.939444966 |

|          |     |             |             |              |            |             |
|----------|-----|-------------|-------------|--------------|------------|-------------|
| Dis3     | 81  | 1.439202531 | 1.32092584  | -0.11827669  | 0.87683237 | 0.939444966 |
| Smurf2   | 123 | 1.151588884 | 1.155942874 | 0.00435399   | 0.8772371  | 0.939741368 |
| Ifnar1   | 66  | 1.500300476 | 1.524101122 | 0.023800646  | 0.87718759 | 0.939741368 |
| Hars2    | 20  | 1.645159285 | 1.159179424 | -0.485979861 | 0.87732357 | 0.939765394 |
| Uba52    | 40  | 1.027257165 | 1.249741563 | 0.222484398  | 0.87742643 | 0.939806971 |
| Cox5b    | 45  | 1.292291129 | 1.299319903 | 0.007028774  | 0.87751915 | 0.939837682 |
| Msl2     | 104 | 0.986257699 | 0.936857924 | -0.049399774 | 0.87762657 | 0.939884125 |
| Zfp346   | 46  | 1.424748259 | 1.398271194 | -0.026477064 | 0.87778858 | 0.939989026 |
| Usp24    | 146 | 1.250909906 | 1.237231681 | -0.013678225 | 0.87787081 | 0.940008479 |
| Sec61a1  | 67  | 1.321297131 | 1.432056911 | 0.11075978   | 0.87847096 | 0.94037663  |
| Dr1      | 54  | 0.947185366 | 0.974018037 | 0.026832671  | 0.87837402 | 0.94037663  |
| Wasf2    | 43  | 1.809700702 | 1.619337519 | -0.190363184 | 0.8783383  | 0.94037663  |
| Zfp628   | 36  | 1.442696595 | 1.563701882 | 0.121005287  | 0.87841627 | 0.94037663  |
| Gmeb1    | 56  | 1.995594623 | 1.718230065 | -0.277364558 | 0.87878524 | 0.940644442 |
| Ep400    | 37  | 0.843893584 | 0.959526462 | 0.115632878  | 0.8791279  | 0.940736736 |
| Cd27     | 3   | 73.66826443 | 73.67618765 | 0.007923219  | 0.87909193 | 0.940736736 |
| Fgfr1op  | 19  | 1.361875604 | 1.822552588 | 0.460676985  | 0.87906298 | 0.940736736 |
| Gfi1     | 5   | 10.88080952 | 10.7177505  | -0.16305902  | 0.87900488 | 0.940736736 |
| Tspan17  | 46  | 1.565314825 | 1.479072552 | -0.086242273 | 0.87935682 | 0.940844478 |
| Ldlr     | 19  | 1.887998776 | 1.313812376 | -0.574186399 | 0.87932274 | 0.940844478 |
| Dnajb7   | 3   | 90.07633588 | 93.51419176 | 3.437855884  | 0.87945282 | 0.940878589 |
| Csnk2a2  | 104 | 4.368999506 | 4.262002772 | -0.106996735 | 0.88003177 | 0.941429332 |
| Ndr3     | 54  | 1.051153129 | 1.021387909 | -0.02976522  | 0.88031672 | 0.941665521 |
| Vps13c   | 5   | 1.234280391 | 1.150262152 | -0.08401824  | 0.88041693 | 0.941704058 |
| Timm10b  | 2   | 1.830692244 | 3.296703297 | 1.466011053  | 0.88049273 | 0.941716498 |
| Azin1    | 61  | 1.383746628 | 1.445435651 | 0.061689023  | 0.88060362 | 0.941766452 |
| Cdc42se2 | 51  | 1.159394517 | 0.961594197 | -0.19780032  | 0.88083219 | 0.941942251 |
| Pitpnm1  | 63  | 2.491124938 | 2.698775275 | 0.207650337  | 0.8812287  | 0.942128555 |
| Casc5    | 16  | 1.030341734 | 1.067571654 | 0.037229919  | 0.88126322 | 0.942128555 |
| Bckdk    | 27  | 1.684501039 | 1.356492272 | -0.328008766 | 0.88115615 | 0.942128555 |
| Irf2     | 21  | 2.086525465 | 2.249274807 | 0.162749342  | 0.88123837 | 0.942128555 |
| Nedd1    | 45  | 1.420104814 | 1.157689041 | -0.262415773 | 0.88163677 | 0.942459235 |
| Bicd1    | 6   | 2.035288592 | 2.936461673 | 0.901173081  | 0.88198937 | 0.942698812 |
| Nadk     | 25  | 0.91755137  | 0.902172929 | -0.015378441 | 0.88197052 | 0.942698812 |

|            |     |             |             |              |            |             |
|------------|-----|-------------|-------------|--------------|------------|-------------|
| Etl4       | 27  | 5.073922986 | 4.91030138  | -0.163621606 | 0.88212086 | 0.942770679 |
| Lima1      | 25  | 24.27838616 | 23.58429449 | -0.694091671 | 0.88245588 | 0.942805993 |
| Usp3       | 75  | 1.665292247 | 1.56942922  | -0.095863027 | 0.88229331 | 0.942805993 |
| Sec23a     | 34  | 1.711269037 | 1.636809329 | -0.074459708 | 0.88247515 | 0.942805993 |
| E2f4       | 57  | 1.570468315 | 1.549673031 | -0.020795285 | 0.88235653 | 0.942805993 |
| Snhg8      | 31  | 0.78695155  | 0.872245818 | 0.085294267  | 0.88226511 | 0.942805993 |
| Mrpl41     | 48  | 1.067285191 | 1.22487099  | 0.1575858    | 0.88287789 | 0.943030288 |
| Faim       | 66  | 1.164850345 | 1.411354889 | 0.246504545  | 0.8828355  | 0.943030288 |
| Rsl1d1     | 4   | 1.202163895 | 0.862068966 | -0.340094929 | 0.88277742 | 0.943030288 |
| Ankrd13b   | 96  | 1.162328924 | 1.167791298 | 0.005462374  | 0.88304575 | 0.943140942 |
| Fam178a    | 39  | 1.030897455 | 1.110172576 | 0.079275121  | 0.88317496 | 0.943149495 |
| Kmt2b      | 116 | 1.515342331 | 1.358574191 | -0.15676814  | 0.88318231 | 0.943149495 |
| Mrs2       | 82  | 1.188290483 | 1.007359446 | -0.180931037 | 0.88364343 | 0.943573252 |
| Sys1       | 65  | 1.448851766 | 1.436959773 | -0.011891993 | 0.88378892 | 0.943591289 |
| Ubp1       | 94  | 1.240527111 | 1.240828403 | 0.000301292  | 0.88376093 | 0.943591289 |
| Plekha5    | 101 | 1.440879723 | 1.290975644 | -0.149904079 | 0.88387128 | 0.943610556 |
| Ndn        | 8   | 59.18526898 | 59.36992359 | 0.184654609  | 0.88476411 | 0.943739808 |
| Nosip      | 8   | 1.601214415 | 1.426033096 | -0.175181319 | 0.88471989 | 0.943739808 |
| Mcur1      | 47  | 1.02983387  | 0.772426772 | -0.257407099 | 0.88424256 | 0.943739808 |
| Prrg2      | 8   | 1.601214415 | 1.426033096 | -0.175181319 | 0.88471989 | 0.943739808 |
| Adal       | 63  | 1.006281823 | 1.019618606 | 0.013336783  | 0.8844546  | 0.943739808 |
| Hmgxb3     | 68  | 1.011505771 | 0.985094426 | -0.026411345 | 0.88415021 | 0.943739808 |
| Arhgap21   | 66  | 0.887386225 | 0.950153875 | 0.06276765   | 0.8846929  | 0.943739808 |
| Unc119b    | 73  | 1.077092294 | 1.095329921 | 0.018237628  | 0.88426978 | 0.943739808 |
| Ildr1      | 24  | 19.39981516 | 19.66372034 | 0.263905179  | 0.88455379 | 0.943739808 |
| Dscr3      | 48  | 1.14493924  | 1.164954085 | 0.020014845  | 0.88458269 | 0.943739808 |
| Pth1r      | 100 | 10.63228937 | 11.60799634 | 0.975706966  | 0.88448822 | 0.943739808 |
| L10002L01F | 25  | 0.928080278 | 0.847295005 | -0.080785273 | 0.88413    | 0.943739808 |
| Mvk        | 19  | 1.062915284 | 1.047281154 | -0.01563413  | 0.88484629 | 0.943758868 |
| Itpripl2   | 38  | 1.817588893 | 1.558339276 | -0.259249617 | 0.88528238 | 0.94415536  |
| Tmem192    | 66  | 1.335592346 | 1.060508294 | -0.275084052 | 0.88543089 | 0.944224444 |
| Actr5      | 42  | 1.017382081 | 0.987406762 | -0.029975319 | 0.88561701 | 0.944224444 |
| Hnrnp1l    | 47  | 0.948253813 | 0.950469134 | 0.002215322  | 0.88564267 | 0.944224444 |
| Serinc1    | 47  | 1.181508469 | 1.119971211 | -0.061537258 | 0.88566889 | 0.944224444 |

|            |     |             |             |              |            |             |
|------------|-----|-------------|-------------|--------------|------------|-------------|
| Bzrap1     | 5   | 10.10549944 | 10.14657972 | 0.041080285  | 0.88552921 | 0.944224444 |
| Herc1      | 41  | 1.208980056 | 1.139537681 | -0.069442375 | 0.88596303 | 0.944469411 |
| Nfs1       | 8   | 1.165428365 | 1.049279039 | -0.116149326 | 0.88607084 | 0.944515729 |
| Wdr7       | 9   | 1.647202407 | 1.396647181 | -0.250555226 | 0.88649222 | 0.944553213 |
| Ppp1r37    | 58  | 0.978670629 | 0.849446302 | -0.129224328 | 0.88643937 | 0.944553213 |
| Ube2j1     | 80  | 1.109689739 | 1.09118168  | -0.018508059 | 0.88627565 | 0.944553213 |
| St3gal3    | 73  | 1.567191914 | 1.373156875 | -0.194035039 | 0.88628407 | 0.944553213 |
| Zpr1       | 47  | 1.272444058 | 1.366965597 | 0.094521539  | 0.88633559 | 0.944553213 |
| Slc25a12   | 53  | 1.278872694 | 1.329857015 | 0.05098432   | 0.886438   | 0.944553213 |
| Mir7665    | 1   | 97.97979798 | 98.24561404 | 0.265816055  | 0.8867904  | 0.944733721 |
| Rxb        | 83  | 1.303473217 | 1.404700746 | 0.101227529  | 0.88674607 | 0.944733721 |
| Cbx3       | 77  | 1.229152592 | 1.154513083 | -0.074639509 | 0.88693714 | 0.944821461 |
| Ago3       | 47  | 1.404716746 | 1.273150962 | -0.131565783 | 0.8872821  | 0.945120316 |
| Snhg5      | 31  | 0.834992625 | 0.787757632 | -0.047234992 | 0.88756998 | 0.945289731 |
| Ipo5       | 112 | 1.330830997 | 1.285993573 | -0.044837424 | 0.88753385 | 0.945289731 |
| Osgep      | 17  | 0.873395392 | 0.928839869 | 0.055444477  | 0.88774282 | 0.94540519  |
| Efemp2     | 53  | 8.926768404 | 8.661960061 | -0.264808342 | 0.88796239 | 0.945435382 |
| Mrps18b    | 58  | 1.33219654  | 1.409933727 | 0.077737187  | 0.88796446 | 0.945435382 |
| Hps4       | 34  | 1.264453013 | 1.404672914 | 0.140219902  | 0.88785706 | 0.945435382 |
| Mir7074    | 2   | 67.27564103 | 66.53858785 | -0.737053177 | 0.88815977 | 0.945533745 |
| Zfp956     | 4   | 1.71901528  | 1.480812013 | -0.238203267 | 0.88818571 | 0.945533745 |
| Rell1      | 63  | 1.33484816  | 1.325026572 | -0.009821588 | 0.88839666 | 0.945637775 |
| Atp1a1     | 73  | 2.107721861 | 1.642081491 | -0.46564037  | 0.88841232 | 0.945637775 |
| Sepn1      | 62  | 0.933315994 | 0.868298886 | -0.065017108 | 0.8885814  | 0.945680548 |
| Orai1      | 71  | 1.338282346 | 1.21928821  | -0.118994136 | 0.88855279 | 0.945680548 |
| .30060C02F | 30  | 0.836273856 | 0.661441487 | -0.174832369 | 0.88894266 | 0.945860676 |
| Gstm5      | 26  | 2.958902014 | 2.895846046 | -0.063055967 | 0.88894402 | 0.945860676 |
| Stau1      | 71  | 1.297196433 | 1.250787029 | -0.046409404 | 0.88892868 | 0.945860676 |
| Ptp4a1     | 73  | 1.248313666 | 1.264953444 | 0.016639779  | 0.88907376 | 0.945861547 |
| Efr3b      | 57  | 3.516215877 | 3.950451393 | 0.434235516  | 0.88901221 | 0.945861547 |
| Lman2      | 7   | 1.371457258 | 2.665622389 | 1.294165131  | 0.88947138 | 0.946099728 |
| '00034H15F | 34  | 1.040047349 | 1.333172566 | 0.293125217  | 0.88948008 | 0.946099728 |
| Adi1       | 18  | 1.177291493 | 1.160199509 | -0.017091984 | 0.88949106 | 0.946099728 |
| Ndufa9     | 22  | 1.161989675 | 1.628550633 | 0.466560958  | 0.88957018 | 0.946115298 |

|            |     |             |             |              |            |             |
|------------|-----|-------------|-------------|--------------|------------|-------------|
| Alox12     | 9   | 10.66076097 | 11.30184659 | 0.641085613  | 0.88964029 | 0.946121297 |
| Gtf3c5     | 35  | 1.442310381 | 1.041024294 | -0.401286087 | 0.8897892  | 0.946211078 |
| Hibch      | 31  | 2.944788079 | 1.800721303 | -1.144066776 | 0.89002615 | 0.946325902 |
| Lins       | 20  | 1.764419673 | 1.702354882 | -0.062064791 | 0.88998208 | 0.946325902 |
| Rnf187     | 77  | 1.143659631 | 0.846893427 | -0.296766204 | 0.89025925 | 0.946505164 |
| Traf3ip1   | 71  | 1.190827461 | 1.032951563 | -0.157875899 | 0.89038806 | 0.946573523 |
| Ankra2     | 54  | 1.11355363  | 1.022700223 | -0.090853407 | 0.89045926 | 0.946580639 |
| Bicd2      | 19  | 1.094400488 | 0.705168799 | -0.389231688 | 0.89080884 | 0.946843848 |
| Upf3a      | 69  | 1.590441436 | 1.568911418 | -0.021530018 | 0.89111703 | 0.946843848 |
| Recql      | 45  | 1.399449302 | 1.162544492 | -0.23690481  | 0.89111829 | 0.946843848 |
| Rfxap      | 74  | 1.136876754 | 0.964191107 | -0.172685647 | 0.8910791  | 0.946843848 |
| Aco2       | 29  | 1.243500294 | 1.233197262 | -0.010303032 | 0.89093203 | 0.946843848 |
| Lrp10      | 57  | 1.358506596 | 1.200100931 | -0.158405666 | 0.89117288 | 0.946843848 |
| Glrx2      | 79  | 1.00408672  | 0.815718899 | -0.188367821 | 0.89122306 | 0.946843848 |
| Tgds       | 19  | 1.3937543   | 1.289517771 | -0.104236529 | 0.89099131 | 0.946843848 |
| Slc1a5     | 1   | 4           | 4.347826087 | 0.347826087  | 0.89150134 | 0.946876822 |
| Gm4890     | 16  | 1.101660345 | 0.843576326 | -0.258084019 | 0.89142496 | 0.946876822 |
| Aar2       | 16  | 1.232660574 | 1.336504117 | 0.103843544  | 0.89151221 | 0.946876822 |
| Inf2       | 49  | 1.587372427 | 1.744084711 | 0.156712284  | 0.89148021 | 0.946876822 |
| Prkcsh     | 5   | 2.111290918 | 2.87608971  | 0.764798792  | 0.89164086 | 0.946944919 |
| Yy1        | 164 | 1.180349224 | 1.018093593 | -0.162255631 | 0.89171393 | 0.946953988 |
| Sfpq       | 24  | 1.611835943 | 1.495219265 | -0.116616679 | 0.89203916 | 0.947230812 |
| Lmo7       | 51  | 3.623396207 | 3.436620175 | -0.186776032 | 0.892204   | 0.947337304 |
| .10056K07F | 30  | 2.164181775 | 2.000044496 | -0.164137279 | 0.89244718 | 0.947458392 |
| lqgap1     | 62  | 1.357170245 | 1.253641823 | -0.103528422 | 0.89239761 | 0.947458392 |
| Klhdc8a    | 78  | 4.229544643 | 4.412002268 | 0.182457625  | 0.89287352 | 0.947842436 |
| Cacng3     | 17  | 33.09327228 | 35.75190658 | 2.658634299  | 0.89314275 | 0.947853962 |
| l30416N02F | 46  | 1.252683066 | 1.127459019 | -0.125224047 | 0.89312    | 0.947853962 |
| Tmem104    | 27  | 0.84367643  | 0.78450963  | -0.0591668   | 0.89308317 | 0.947853962 |
| Slc35b2    | 28  | 1.500192792 | 1.556227951 | 0.056035159  | 0.8930475  | 0.947853962 |
| Cutc       | 34  | 0.867787286 | 0.884154228 | 0.016366942  | 0.89341175 | 0.948070869 |
| Zbtb45     | 16  | 1.209415639 | 1.04574729  | -0.163668349 | 0.89366975 | 0.948261684 |
| Ccdc115    | 15  | 2.17449379  | 1.51292601  | -0.66156778  | 0.8937208  | 0.948261684 |
| Tug1       | 88  | 1.260748347 | 1.337840661 | 0.077092314  | 0.89394972 | 0.948284444 |

|            |    |             |             |              |            |             |
|------------|----|-------------|-------------|--------------|------------|-------------|
| Rbm45      | 25 | 1.022920043 | 0.952365645 | -0.070554398 | 0.89385169 | 0.948284444 |
| Samd4b     | 98 | 1.235703216 | 1.342182224 | 0.106479008  | 0.89400075 | 0.948284444 |
| Thoc5      | 29 | 1.413221395 | 1.447198179 | 0.033976784  | 0.89392784 | 0.948284444 |
| Aste1      | 25 | 1.114222899 | 0.914788425 | -0.199434474 | 0.89425752 | 0.948446183 |
| '00018L02F | 28 | 0.613481602 | 0.750535306 | 0.137053704  | 0.8942825  | 0.948446183 |
| Hsf2       | 52 | 0.803197969 | 0.717747056 | -0.085450913 | 0.89482981 | 0.948958056 |
| Prkab1     | 37 | 1.721779551 | 2.542480399 | 0.820700848  | 0.89510973 | 0.949141221 |
| Hace1      | 38 | 0.996875064 | 0.989130555 | -0.007744508 | 0.89513189 | 0.949141221 |
| Rheb       | 88 | 1.227906175 | 1.279124061 | 0.051217887  | 0.89536261 | 0.949317263 |
| Slc41a3    | 14 | 72.31393005 | 70.5974515  | -1.716478545 | 0.89548849 | 0.949382136 |
| Polr2l     | 10 | 0.518809657 | 0.651567944 | 0.132758287  | 0.89565388 | 0.94948888  |
| Tbcb       | 19 | 1.090225132 | 1.107895923 | 0.017670791  | 0.89573271 | 0.949503853 |
| Dym        | 57 | 1.537094831 | 1.461125152 | -0.075969679 | 0.89583515 | 0.949543845 |
| Rptor      | 14 | 4.430743076 | 3.894673112 | -0.536069965 | 0.89642381 | 0.950099169 |
| Pfdn4      | 26 | 16.21404789 | 16.27759427 | 0.06354638   | 0.89668113 | 0.950303253 |
| '00120C14F | 12 | 0.913621672 | 0.809143012 | -0.10447866  | 0.89709718 | 0.950675527 |
| Rnf19a     | 84 | 1.235055496 | 1.18682268  | -0.048232817 | 0.89748031 | 0.950760397 |
| Gramd4     | 82 | 1.052412397 | 0.941299793 | -0.111112604 | 0.89749732 | 0.950760397 |
| Mir33      | 4  | 74.80053191 | 77.66650579 | 2.865973877  | 0.89745989 | 0.950760397 |
| Pigg       | 22 | 1.657825396 | 1.295614422 | -0.362210974 | 0.89750123 | 0.950760397 |
| Psma5      | 24 | 0.808325281 | 0.700593174 | -0.107732108 | 0.89737284 | 0.950760397 |
| Tfap4      | 32 | 0.996346357 | 0.771348705 | -0.224997652 | 0.8976783  | 0.95076591  |
| Smkr-ps    | 29 | 1.528977897 | 1.467526952 | -0.061450945 | 0.89767165 | 0.95076591  |
| Mcm8       | 24 | 1.052162007 | 1.062658954 | 0.010496947  | 0.89770853 | 0.95076591  |
| Polr1b     | 14 | 1.808416936 | 2.739380802 | 0.930963866  | 0.8977656  | 0.95076591  |
| Acbd5      | 36 | 1.440478439 | 1.290394525 | -0.150083914 | 0.89870875 | 0.951554228 |
| Zfp438     | 30 | 0.801637157 | 1.146585189 | 0.344948032  | 0.89881856 | 0.951554228 |
| Rfc5       | 34 | 1.331630897 | 1.377772457 | 0.04614156   | 0.89889307 | 0.951554228 |
| Dppa3      | 3  | 82.49342238 | 79.88749969 | -2.605922699 | 0.89892521 | 0.951554228 |
| Ephb3      | 63 | 12.82549839 | 12.75528346 | -0.07021493  | 0.8989639  | 0.951554228 |
| Hist3h2a   | 11 | 1.189460586 | 0.837005889 | -0.352454696 | 0.89886065 | 0.951554228 |
| Kmt2e      | 9  | 0.703181664 | 0.770336884 | 0.067155221  | 0.8988344  | 0.951554228 |
| Atg3       | 37 | 1.931223674 | 2.066994113 | 0.135770439  | 0.89916538 | 0.951643327 |
| Lars2      | 3  | 4.065248635 | 4.304669842 | 0.239421208  | 0.89924263 | 0.951643327 |



|            |     |             |             |              |            |             |
|------------|-----|-------------|-------------|--------------|------------|-------------|
| Plaa       | 51  | 1.455074048 | 1.323005848 | -0.1320682   | 0.8992355  | 0.951643327 |
| Ttc21b     | 27  | 1.647891361 | 1.610960291 | -0.03693107  | 0.89939627 | 0.951668656 |
| Cfap58     | 14  | 2.768384192 | 3.260941414 | 0.492557222  | 0.89934573 | 0.951668656 |
| Sh2b2      | 20  | 1.813145129 | 1.586501003 | -0.226644126 | 0.89952915 | 0.951740625 |
| Gxylt2     | 35  | 17.52872602 | 18.44879502 | 0.920068996  | 0.89991285 | 0.95180842  |
| Lsm1       | 69  | 0.893285816 | 0.929189587 | 0.035903771  | 0.89980726 | 0.95180842  |
| Dph3       | 33  | 1.605146843 | 1.673061745 | 0.067914903  | 0.89975083 | 0.95180842  |
| Dynll1     | 57  | 1.171209551 | 1.116554525 | -0.054655027 | 0.89991754 | 0.95180842  |
| Tox4       | 17  | 1.491275697 | 1.451320152 | -0.039955545 | 0.89973496 | 0.95180842  |
| Pdyp       | 78  | 1.316816777 | 1.361690721 | 0.044873944  | 0.90052585 | 0.952100941 |
| Glyr1      | 42  | 1.163559505 | 0.886857858 | -0.276701647 | 0.90057385 | 0.952100941 |
| Ifrd1      | 32  | 1.0913356   | 1.118373801 | 0.027038201  | 0.90048463 | 0.952100941 |
| Upp1       | 11  | 1.704444746 | 2.348901099 | 0.644456353  | 0.90039237 | 0.952100941 |
| Atxn7l3b   | 77  | 1.410392234 | 1.279524516 | -0.130867718 | 0.90058342 | 0.952100941 |
| Tradd      | 36  | 1.031014443 | 0.898195074 | -0.132819368 | 0.90043499 | 0.952100941 |
| Opa3       | 27  | 1.014684793 | 1.000971822 | -0.013712971 | 0.90068589 | 0.952140679 |
| Evi5l      | 28  | 1.708744874 | 1.484190402 | -0.224554472 | 0.90091581 | 0.952315131 |
| Gpatch8    | 69  | 1.53815925  | 1.55003019  | 0.01187094   | 0.90112593 | 0.952468621 |
| Fancc      | 19  | 1.324870495 | 1.604904495 | 0.280034     | 0.901323   | 0.952608303 |
| Tet3       | 45  | 2.742659087 | 2.52399203  | -0.218667058 | 0.90163615 | 0.95287064  |
| Rps11      | 42  | 0.953945207 | 1.019551635 | 0.065606428  | 0.90177949 | 0.952891241 |
| Setd1a     | 106 | 1.168875783 | 0.965614063 | -0.20326172  | 0.90178552 | 0.952891241 |
| Cul3       | 125 | 1.095794222 | 1.079303872 | -0.016490349 | 0.90185251 | 0.952893412 |
| Slc17a5    | 35  | 1.010057484 | 0.940441326 | -0.069616158 | 0.90194694 | 0.952924578 |
| .10032A03F | 5   | 1.648756219 | 1.891457708 | 0.242701489  | 0.90230836 | 0.953237793 |
| Dlg2       | 7   | 42.86296429 | 42.83091277 | -0.032051525 | 0.902382   | 0.953246954 |
| Tab2       | 137 | 1.437826408 | 1.455559036 | 0.017732628  | 0.90274143 | 0.953337233 |
| Trappc2l   | 14  | 1.102812191 | 0.973876272 | -0.128935918 | 0.90266959 | 0.953337233 |
| Uros       | 36  | 1.535132716 | 1.524567442 | -0.010565274 | 0.9027923  | 0.953337233 |
| Rps6ka1    | 84  | 13.54052313 | 12.78271251 | -0.757810616 | 0.9025731  | 0.953337233 |
| Yod1       | 32  | 1.624418234 | 1.986951002 | 0.362532768  | 0.90272042 | 0.953337233 |
| Mettl5     | 10  | 2.060990287 | 1.256377035 | -0.804613252 | 0.90288649 | 0.953368089 |
| .10404O09F | 9   | 1.901965139 | 1.900071168 | -0.001893971 | 0.90299242 | 0.953411336 |
| Ccdc86     | 18  | 2.106894011 | 1.645787338 | -0.461106672 | 0.90327342 | 0.953639408 |

|            |     |             |             |              |            |             |
|------------|-----|-------------|-------------|--------------|------------|-------------|
| Htati2     | 30  | 2.471270584 | 2.725769115 | 0.254498531  | 0.90375382 | 0.953754489 |
| Mical3     | 6   | 33.94973903 | 35.24745757 | 1.297718534  | 0.90381359 | 0.953754489 |
| Tulp4      | 95  | 1.324188212 | 1.249816824 | -0.074371388 | 0.90381271 | 0.953754489 |
| N6amt1     | 7   | 2.826436305 | 3.092529406 | 0.266093101  | 0.90379873 | 0.953754489 |
| Pfn1       | 82  | 1.224573098 | 1.171387877 | -0.053185221 | 0.90383739 | 0.953754489 |
| Hilpda     | 16  | 1.557171221 | 1.195471256 | -0.361699965 | 0.90369433 | 0.953754489 |
| Scamp2     | 14  | 0.918303825 | 0.847389839 | -0.070913986 | 0.90356694 | 0.953754489 |
| Sema3a     | 1   | 4.430379747 | 4.694835681 | 0.264455934  | 0.9039848  | 0.953829986 |
| Chchd1     | 27  | 1.066244305 | 1.049076689 | -0.017167616 | 0.90403894 | 0.953829986 |
| Ktn1       | 51  | 0.743664455 | 0.617964456 | -0.125699999 | 0.90416004 | 0.953889169 |
| 110300C02F | 82  | 2.028831741 | 1.884495665 | -0.144336076 | 0.90449425 | 0.953940891 |
| Slc29a2    | 12  | 1.55579108  | 0.941374411 | -0.614416669 | 0.90447449 | 0.953940891 |
| Gtpbp8     | 30  | 3.568876897 | 3.590037408 | 0.021160512  | 0.90443856 | 0.953940891 |
| Clcn3      | 53  | 0.865112343 | 0.776922918 | -0.088189425 | 0.90459912 | 0.953940891 |
| Chn1os3    | 2   | 97.20938375 | 97.30037752 | 0.090993766  | 0.90459772 | 0.953940891 |
| Gm9776     | 18  | 0.880888791 | 0.750546703 | -0.130342088 | 0.90459313 | 0.953940891 |
| Vopp1      | 48  | 1.495259955 | 1.498028502 | 0.002768546  | 0.90475804 | 0.953976078 |
| Asxl1      | 91  | 1.248102361 | 1.251435243 | 0.003332882  | 0.90488154 | 0.953976078 |
| Ttc1       | 3   | 2.159823381 | 2.682070781 | 0.5222474    | 0.90482118 | 0.953976078 |
| Mir7059    | 5   | 58.03036581 | 59.72555263 | 1.695186819  | 0.90489253 | 0.953976078 |
| Rpsa       | 57  | 2.61751625  | 2.505000165 | -0.112516085 | 0.9051029  | 0.954129308 |
| Mmadhc     | 6   | 1.153039832 | 0.796788881 | -0.356250951 | 0.90525866 | 0.954156415 |
| Ankrd40    | 52  | 1.889971811 | 1.596146724 | -0.293825087 | 0.90524598 | 0.954156415 |
| Obfc1      | 28  | 1.44251251  | 1.359704888 | -0.082807622 | 0.90556824 | 0.954414163 |
| Slc52a2    | 23  | 2.357066625 | 2.016903929 | -0.340162696 | 0.90564882 | 0.954430531 |
| Hspa5      | 36  | 1.351720825 | 1.537946371 | 0.186225546  | 0.90578634 | 0.954472034 |
| E2f7       | 119 | 1.015787375 | 0.959680375 | -0.056106999 | 0.90581829 | 0.954472034 |
| Senp3      | 15  | 0.851601049 | 0.628140517 | -0.223460533 | 0.90598574 | 0.954579936 |
| Kdm4b      | 47  | 1.346064364 | 1.322739162 | -0.023325202 | 0.9063452  | 0.954890112 |
| Kif1b      | 115 | 1.203130183 | 1.206441278 | 0.003311095  | 0.90655638 | 0.954930089 |
| Prosc      | 38  | 1.241041844 | 1.316662132 | 0.075620288  | 0.90657837 | 0.954930089 |
| Sh2d5      | 10  | 1.226403866 | 1.350365014 | 0.123961148  | 0.90650042 | 0.954930089 |
| Olfml2a    | 9   | 8.99471511  | 10.54198955 | 1.547274438  | 0.90677571 | 0.955069397 |
| Atoh8      | 73  | 1.520999703 | 1.433094275 | -0.087905428 | 0.90694806 | 0.955089101 |

|            |     |             |             |              |            |             |
|------------|-----|-------------|-------------|--------------|------------|-------------|
| Ss18       | 128 | 1.360348411 | 1.211429774 | -0.148918637 | 0.90690843 | 0.955089101 |
| Lipa       | 8   | 2.868736059 | 2.382588255 | -0.486147805 | 0.90698968 | 0.955089101 |
| 30103J11R  | 13  | 1.572058023 | 1.228004143 | -0.34405388  | 0.90717998 | 0.955220941 |
| Zfp14      | 5   | 5.256770614 | 5.095772773 | -0.160997841 | 0.90742732 | 0.955412818 |
| Mdc1       | 38  | 1.49010819  | 1.477572011 | -0.012536179 | 0.90773508 | 0.955668288 |
| Naa38      | 30  | 1.584137615 | 1.516020833 | -0.068116781 | 0.90788466 | 0.95575719  |
| Erp44      | 19  | 0.472138815 | 0.425806546 | -0.046332269 | 0.90807597 | 0.955868107 |
| Rhoq       | 93  | 1.173200004 | 1.246513796 | 0.073313792  | 0.9081203  | 0.955868107 |
| Mcu        | 41  | 1.373650178 | 1.243910161 | -0.129740017 | 0.90836273 | 0.956054701 |
| Eftud1     | 22  | 2.356452096 | 1.785249608 | -0.571202488 | 0.9086675  | 0.95630689  |
| Sox8       | 7   | 1.563207435 | 2.98272317  | 1.419515735  | 0.90873434 | 0.956308646 |
| Slc25a42   | 38  | 1.325891631 | 1.083105286 | -0.242786345 | 0.90890844 | 0.956423262 |
| Lect1      | 1   | 86.02941176 | 86.53846154 | 0.509049774  | 0.90958744 | 0.95702136  |
| Tmem59     | 37  | 1.452732513 | 1.323583929 | -0.129148584 | 0.90960726 | 0.95702136  |
| Chrna9     | 1   | 88.60759494 | 88.28125    | -0.326344937 | 0.9098426  | 0.957200333 |
| '00001G17F | 3   | 1.471584102 | 1.512893465 | 0.041309364  | 0.91018531 | 0.957218151 |
| Agfg2      | 42  | 1.296928279 | 1.30385265  | 0.00692437   | 0.91018569 | 0.957218151 |
| Zzef1      | 29  | 0.789980028 | 0.763128518 | -0.026851509 | 0.91011272 | 0.957218151 |
| Rrp36      | 20  | 1.58919376  | 1.467032942 | -0.122160818 | 0.91003173 | 0.957218151 |
| Ckmt1      | 9   | 7.197722394 | 7.736465728 | 0.538743334  | 0.91017198 | 0.957218151 |
| Pik3c2a    | 42  | 1.37522581  | 1.360247849 | -0.014977961 | 0.91031916 | 0.957289902 |
| Sema3f     | 19  | 0.95502895  | 1.050625609 | 0.095596659  | 0.91091127 | 0.957508869 |
| Agpat5     | 75  | 1.269424691 | 1.307587427 | 0.038162737  | 0.91069004 | 0.957508869 |
| Syf2       | 52  | 1.901608812 | 1.567565453 | -0.334043359 | 0.91099505 | 0.957508869 |
| Atg16l1    | 64  | 1.057626517 | 0.969865363 | -0.087761153 | 0.9110494  | 0.957508869 |
| Hspb3      | 7   | 85.72841361 | 84.99601801 | -0.732395599 | 0.91082412 | 0.957508869 |
| Stard10    | 108 | 2.236501239 | 1.858366572 | -0.378134668 | 0.91097608 | 0.957508869 |
| Acot13     | 46  | 1.198622953 | 1.055686243 | -0.142936709 | 0.91089338 | 0.957508869 |
| Cog7       | 43  | 1.375124505 | 1.425453667 | 0.050329163  | 0.91081063 | 0.957508869 |
| Dis3l2     | 38  | 1.524343398 | 1.929130469 | 0.404787071  | 0.91136845 | 0.957775597 |
| Bend7      | 98  | 1.286784847 | 1.295720511 | 0.008935664  | 0.91145327 | 0.957796142 |
| Ddx1       | 16  | 1.147075735 | 1.524621734 | 0.377546     | 0.91156097 | 0.95783225  |
| Mpv17      | 2   | 0.458715596 | 0.367647059 | -0.091068538 | 0.91161818 | 0.95783225  |
| Rdx        | 57  | 1.099311768 | 1.209252664 | 0.109940896  | 0.91177756 | 0.957931115 |

|            |     |             |             |              |            |             |
|------------|-----|-------------|-------------|--------------|------------|-------------|
| Gm608      | 56  | 2.269180378 | 2.276356614 | 0.007176236  | 0.91205017 | 0.958080334 |
| I33427G17F | 8   | 2.453262811 | 2.58497807  | 0.131715259  | 0.91198634 | 0.958080334 |
| Sccpdh     | 103 | 1.262362804 | 1.30116726  | 0.038804455  | 0.91213913 | 0.958105194 |
| Mybl1      | 73  | 1.216723098 | 1.103292848 | -0.11343025  | 0.91227275 | 0.958176964 |
| Gmppb      | 16  | 1.546005377 | 1.135731893 | -0.410273484 | 0.91248255 | 0.958191567 |
| Umps       | 19  | 2.061357035 | 1.909544348 | -0.151812687 | 0.91241861 | 0.958191567 |
| Keap1      | 68  | 1.098870385 | 1.118398095 | 0.019527709  | 0.91247239 | 0.958191567 |
| Pgap1      | 37  | 1.076702704 | 1.080232699 | 0.003529995  | 0.91269618 | 0.958347317 |
| Hes1       | 4   | 2.192982456 | 2.915140415 | 0.722157959  | 0.91299008 | 0.958587326 |
| Nit2       | 1   | 4.643962848 | 4.469273743 | -0.174689105 | 0.91306404 | 0.95859639  |
| Mmaa       | 68  | 1.495773607 | 1.402048025 | -0.093725582 | 0.91318225 | 0.95862621  |
| Frs2       | 117 | 1.309928381 | 1.009621306 | -0.300307075 | 0.9132231  | 0.95862621  |
| Ccdc58     | 46  | 0.824540744 | 0.863627371 | 0.039086627  | 0.91332635 | 0.958666016 |
| Usp46      | 96  | 1.257245518 | 1.224961839 | -0.032283679 | 0.91369145 | 0.958912056 |
| Gm23363    | 6   | 48.91468646 | 48.4535165  | -0.461169954 | 0.91368075 | 0.958912056 |
| Kri1       | 44  | 1.464569343 | 1.441097939 | -0.023471404 | 0.91390405 | 0.959066582 |
| Homez      | 48  | 4.301671093 | 3.93587943  | -0.365791663 | 0.91399248 | 0.959090792 |
| Sdad1      | 32  | 1.818894964 | 2.054623754 | 0.23572879   | 0.91416299 | 0.959201119 |
| Ccl22      | 2   | 78.44827586 | 75.72685953 | -2.721416328 | 0.91429544 | 0.95927151  |
| Ehd1       | 83  | 1.205218474 | 1.174509874 | -0.0307086   | 0.91456609 | 0.959349692 |
| Sbno1      | 15  | 2.14358228  | 2.097015255 | -0.046567025 | 0.91453665 | 0.959349692 |
| Hadha      | 18  | 1.50783419  | 1.487408095 | -0.020426095 | 0.91455472 | 0.959349692 |
| Snhg17     | 12  | 1.596437245 | 2.032720917 | 0.436283672  | 0.91463394 | 0.959352282 |
| Tcn2       | 10  | 3.146352643 | 3.36966238  | 0.223309736  | 0.91472164 | 0.959375694 |
| Naa40      | 62  | 0.868325701 | 0.789079416 | -0.079246286 | 0.91485357 | 0.95944549  |
| B3galnt2   | 53  | 1.201600643 | 0.945753948 | -0.255846695 | 0.91522681 | 0.959768323 |
| Cnst       | 70  | 1.206196482 | 1.197877278 | -0.008319204 | 0.91529397 | 0.959770168 |
| Bbc3       | 41  | 1.328957046 | 1.643180563 | 0.314223517  | 0.91562204 | 0.960045575 |
| Pabpc1     | 72  | 1.232682916 | 1.066728656 | -0.16595426  | 0.91571409 | 0.960073488 |
| Psmb2      | 13  | 2.622638932 | 2.435857089 | -0.186781843 | 0.91583441 | 0.960131033 |
| Klhl28     | 18  | 1.964428417 | 2.017494964 | 0.053066548  | 0.91615068 | 0.960393995 |
| I10026O09F | 17  | 1.080953214 | 0.938130613 | -0.142822601 | 0.91624882 | 0.960428258 |
| Srp72      | 45  | 1.103338651 | 1.12989953  | 0.026560879  | 0.91696893 | 0.961114433 |
| Usp20      | 15  | 0.60318621  | 0.912749494 | 0.309563284  | 0.91710412 | 0.961187472 |

|          |     |             |             |              |            |             |
|----------|-----|-------------|-------------|--------------|------------|-------------|
| Etf1     | 52  | 1.440348228 | 1.305142684 | -0.135205543 | 0.91724556 | 0.961267055 |
| Agrn     | 136 | 1.694431436 | 1.690388907 | -0.00404253  | 0.91738265 | 0.961342073 |
| Ctnnbl1  | 17  | 1.876234239 | 1.753383158 | -0.122851081 | 0.91749831 | 0.961394616 |
| Arl6ip6  | 72  | 1.231690376 | 1.16050536  | -0.071185016 | 0.91759928 | 0.961431759 |
| Qk       | 118 | 1.097862591 | 1.011791687 | -0.086070904 | 0.917725   | 0.961494831 |
| Mapkapk5 | 76  | 1.010544303 | 1.058819673 | 0.04827537   | 0.91801673 | 0.96173181  |
| Sik1     | 101 | 1.111077228 | 1.115707642 | 0.004630414  | 0.91808491 | 0.96173458  |
| Tlk1     | 181 | 1.236434975 | 1.140386294 | -0.096048682 | 0.91822794 | 0.961776483 |
| Uqcc3    | 17  | 1.341558266 | 1.057206577 | -0.284351689 | 0.91827844 | 0.961776483 |
| Slc26a9  | 7   | 69.43418331 | 70.26672085 | 0.832537546  | 0.91832154 | 0.961776483 |
| Tmem179b | 9   | 0.628727037 | 0.52013791  | -0.108589127 | 0.91851924 | 0.961914881 |
| Arfgef1  | 122 | 1.127464096 | 1.069727341 | -0.057736755 | 0.91873246 | 0.961932227 |
| Ccnj     | 110 | 1.979373971 | 1.928330806 | -0.051043166 | 0.91867308 | 0.961932227 |
| Pds5b    | 69  | 1.222581976 | 1.081373658 | -0.141208318 | 0.91872043 | 0.961932227 |
| Tbl1x    | 59  | 19.1775335  | 18.93700481 | -0.240528693 | 0.9189579  | 0.962099611 |
| Abhd3    | 39  | 4.428955408 | 5.083881454 | 0.654926047  | 0.91910082 | 0.962151434 |
| Inpp5e   | 32  | 0.993034913 | 1.181076384 | 0.188041471  | 0.91913853 | 0.962151434 |
| Sft2d2   | 40  | 1.319005385 | 1.29856854  | -0.020436845 | 0.9194581  | 0.962417307 |
| Pkn3     | 20  | 2.650572435 | 2.539439947 | -0.111132488 | 0.91958838 | 0.962485009 |
| Fam89b   | 43  | 13.56680809 | 13.25289052 | -0.313917573 | 0.91965596 | 0.962487094 |
| Ube2f    | 92  | 1.118803859 | 1.148606913 | 0.029803054  | 0.91983063 | 0.962543677 |
| Celf1    | 73  | 1.470502333 | 1.211031713 | -0.25947062  | 0.91984121 | 0.962543677 |
| Pafah1b2 | 81  | 1.17467101  | 1.127714682 | -0.046956328 | 0.92019723 | 0.962847562 |
| Pcgf6    | 36  | 1.042554893 | 1.03559656  | -0.006958333 | 0.92028906 | 0.962874988 |
| H2afy    | 78  | 1.649518197 | 1.539688204 | -0.109829994 | 0.92072703 | 0.963058557 |
| Fastk    | 66  | 5.392571426 | 5.327986909 | -0.064584517 | 0.92071143 | 0.963058557 |
| Vapa     | 147 | 1.238968366 | 1.114759788 | -0.124208578 | 0.92070244 | 0.963058557 |
| Slc25a10 | 35  | 1.201948505 | 1.394622894 | 0.192674389  | 0.92068031 | 0.963058557 |
| Txlng    | 10  | 19.66977319 | 19.8125716  | 0.142798405  | 0.92131731 | 0.96351281  |
| Hnrnpul2 | 16  | 1.176612528 | 0.791173636 | -0.385438891 | 0.9213514  | 0.96351281  |
| Ephb4    | 6   | 1.035860275 | 1.476793249 | 0.440932974  | 0.9213583  | 0.96351281  |
| Higd1a   | 55  | 1.409752023 | 1.419188325 | 0.009436302  | 0.92154518 | 0.963639562 |
| Cenpq    | 10  | 1.696958497 | 2.175428089 | 0.478469592  | 0.92168312 | 0.963679327 |
| Calu     | 86  | 1.678091503 | 1.432190646 | -0.245900857 | 0.92171455 | 0.963679327 |

|            |     |             |             |              |            |             |
|------------|-----|-------------|-------------|--------------|------------|-------------|
| Larp1      | 113 | 1.086501134 | 1.036200373 | -0.05030076  | 0.92184677 | 0.963748892 |
| Krit1      | 10  | 1.460807724 | 1.732456914 | 0.27164919   | 0.92201792 | 0.96385916  |
| U2af2      | 55  | 1.09131778  | 1.018154994 | -0.073162786 | 0.92213397 | 0.963911803 |
| Anks3      | 10  | 0.562861153 | 0.531562116 | -0.031299037 | 0.92254883 | 0.964002106 |
| Taf1c      | 16  | 1.518518066 | 1.514324951 | -0.004193115 | 0.92238488 | 0.964002106 |
| Mrpl32     | 5   | 0.881542087 | 1.111943375 | 0.230401288  | 0.92248017 | 0.964002106 |
| Gpcpd1     | 68  | 1.057403865 | 1.10470499  | 0.047301125  | 0.92253066 | 0.964002106 |
| Adamts20   | 93  | 67.06004126 | 67.30957206 | 0.249530803  | 0.92250371 | 0.964002106 |
| Fam104a    | 65  | 0.67502131  | 0.800036381 | 0.125015072  | 0.92282055 | 0.964038969 |
| Grhl1      | 138 | 1.676007189 | 1.53836714  | -0.137640049 | 0.92270313 | 0.964038969 |
| L10037F02F | 36  | 1.257741512 | 1.290569369 | 0.032827856  | 0.92273661 | 0.964038969 |
| Fam120b    | 3   | 5.79096887  | 4.869688985 | -0.921279885 | 0.9229126  | 0.964038969 |
| Fsd1l      | 54  | 3.104249981 | 3.435607671 | 0.33135769   | 0.92287446 | 0.964038969 |
| Gm6981     | 145 | 1.05114997  | 1.023008305 | -0.028141665 | 0.92310252 | 0.964168727 |
| Rcc2       | 35  | 1.218642918 | 1.190535655 | -0.028107263 | 0.9232412  | 0.964244941 |
| Arhgef2    | 86  | 12.24721255 | 11.85850996 | -0.388702595 | 0.92350573 | 0.964379637 |
| Fbxo47     | 19  | 1.605249705 | 1.693309933 | 0.088060229  | 0.92355896 | 0.964379637 |
| Trappc6b   | 38  | 1.469406771 | 1.411687653 | -0.057719117 | 0.92363305 | 0.964379637 |
| Olf212     | 1   | 99.39759036 | 99.31034483 | -0.087245534 | 0.92359027 | 0.964379637 |
| Ilf3       | 46  | 1.244459234 | 1.379509161 | 0.135049928  | 0.9237447  | 0.964427587 |
| Wdr73      | 7   | 2.729213593 | 2.968813727 | 0.239600134  | 0.92384849 | 0.964467328 |
| Letm2      | 24  | 1.446496667 | 1.333345866 | -0.113150801 | 0.92392705 | 0.964480725 |
| Dpp10      | 25  | 39.04964075 | 39.56139853 | 0.511757782  | 0.92403245 | 0.96452213  |
| Rn4.5s     | 9   | 74.11876512 | 72.80744843 | -1.311316691 | 0.92433255 | 0.964766753 |
| Pvr        | 37  | 1.2588988   | 1.298129425 | 0.039230626  | 0.92442642 | 0.964796106 |
| Mpp7       | 24  | 1.373606013 | 1.236029398 | -0.137576615 | 0.9246283  | 0.964936138 |
| Pnpla8     | 50  | 0.964599038 | 0.892236417 | -0.072362621 | 0.92475786 | 0.964936138 |
| Tmem242    | 5   | 1.584549878 | 1.602683031 | 0.018133153  | 0.92471132 | 0.964936138 |
| Zfp386     | 30  | 1.070774688 | 0.866379096 | -0.204395593 | 0.92490527 | 0.965021323 |
| Nudt6      | 60  | 1.233222445 | 1.100749378 | -0.132473067 | 0.9252268  | 0.965261935 |
| Dlgap2     | 36  | 47.39437552 | 46.98311283 | -0.411262696 | 0.92533322 | 0.965261935 |
| Rnf41      | 18  | 1.364140928 | 1.248914416 | -0.115226512 | 0.92527851 | 0.965261935 |
| Flii       | 37  | 1.168683441 | 1.206349019 | 0.037665577  | 0.92542812 | 0.96529231  |
| Dgat1      | 74  | 1.228165557 | 1.182045842 | -0.046119715 | 0.92568714 | 0.96542524  |

|         |     |             |             |              |            |             |
|---------|-----|-------------|-------------|--------------|------------|-------------|
| Pmpcb   | 18  | 0.821125983 | 0.721253385 | -0.099872598 | 0.92566493 | 0.96542524  |
| Phlda1  | 92  | 1.111571247 | 1.028052788 | -0.083518458 | 0.92603478 | 0.965628012 |
| Pttg1ip | 9   | 1.795272536 | 1.280440803 | -0.514831733 | 0.92607898 | 0.965628012 |
| Med9os  | 10  | 0.90069086  | 2.254653263 | 1.353962403  | 0.92597102 | 0.965628012 |
| Tmem205 | 15  | 1.45965496  | 1.406575826 | -0.053079134 | 0.9262465  | 0.965665441 |
| Ddx31   | 32  | 1.247685832 | 1.24800624  | 0.000320408  | 0.92622263 | 0.965665441 |
| Abcb8   | 10  | 0.910316756 | 0.740980097 | -0.16933666  | 0.92631832 | 0.965671716 |
| Suv39h2 | 55  | 0.860137351 | 0.918343622 | 0.058206271  | 0.92675293 | 0.966056156 |
| Amd1    | 19  | 1.422497286 | 1.394670164 | -0.027827122 | 0.92710774 | 0.966297194 |
| Lig4    | 16  | 1.6961741   | 1.312352784 | -0.383821316 | 0.92711586 | 0.966297194 |
| Grk6    | 97  | 1.489503817 | 1.443905957 | -0.04559786  | 0.92724576 | 0.966363939 |
| Rarg    | 55  | 2.611583219 | 2.499734925 | -0.111848295 | 0.92758719 | 0.966582471 |
| Ndfip2  | 86  | 1.196303623 | 1.035659239 | -0.160644384 | 0.92757694 | 0.966582471 |
| Iqca    | 11  | 11.34711942 | 13.99981823 | 2.652698811  | 0.92769005 | 0.966621013 |
| Atp8b3  | 7   | 4.383547491 | 4.214657908 | -0.168889583 | 0.92808724 | 0.966768834 |
| Gm12522 | 12  | 1.980749738 | 1.489405136 | -0.491344603 | 0.92813558 | 0.966768834 |
| Wee1    | 112 | 1.252252929 | 1.012542605 | -0.239710324 | 0.928125   | 0.966768834 |
| Itga4   | 16  | 25.86057969 | 26.21371368 | 0.35313399   | 0.92815617 | 0.966768834 |
| Fam149b | 9   | 1.086212657 | 1.183738658 | 0.097526001  | 0.92816133 | 0.966768834 |
| Maf1    | 23  | 0.605691599 | 0.833659003 | 0.227967404  | 0.92824896 | 0.966791486 |
| Iws1    | 28  | 1.074584978 | 0.95124948  | -0.123335499 | 0.9286692  | 0.966833799 |
| Smchd1  | 114 | 1.188950236 | 1.155100074 | -0.033850162 | 0.92868491 | 0.966833799 |
| Zc3h12c | 85  | 1.532856143 | 1.471257298 | -0.061598845 | 0.92843869 | 0.966833799 |
| Slc16a6 | 99  | 1.402062055 | 1.277405875 | -0.124656179 | 0.92855225 | 0.966833799 |
| Amacr   | 24  | 1.358505101 | 1.423374309 | 0.064869207  | 0.92837714 | 0.966833799 |
| Tbc1d19 | 25  | 1.447685361 | 1.350650696 | -0.097034665 | 0.92863256 | 0.966833799 |
| Mettl3  | 5   | 1.590070251 | 2.314967105 | 0.724896854  | 0.92877058 | 0.966854388 |
| Aim1    | 3   | 1.777078857 | 2.086552559 | 0.309473702  | 0.92920316 | 0.967236087 |
| Trub2   | 11  | 1.775656983 | 1.775374444 | -0.000282539 | 0.92937161 | 0.967342819 |
| Stat5b  | 100 | 1.319786496 | 1.289932884 | -0.029853612 | 0.92953451 | 0.96737513  |
| Ism2    | 38  | 1.833833302 | 1.985120379 | 0.151287077  | 0.9295013  | 0.96737513  |
| Asap3   | 19  | 1.568845714 | 1.540327103 | -0.028518611 | 0.92963545 | 0.967380524 |
| Zfp821  | 88  | 1.207152501 | 1.184369371 | -0.022783129 | 0.92967154 | 0.967380524 |
| Hmgcl   | 52  | 2.78102024  | 2.673232713 | -0.107787528 | 0.92985874 | 0.967506711 |

|            |     |             |             |              |            |             |
|------------|-----|-------------|-------------|--------------|------------|-------------|
| Dtwd1      | 26  | 1.632606438 | 1.245922011 | -0.386684427 | 0.93003534 | 0.967621855 |
| Ndufs3     | 1   | 4.776119403 | 4.918032787 | 0.141913384  | 0.93036512 | 0.967786781 |
| Ilk        | 14  | 2.612545181 | 2.314148346 | -0.298396835 | 0.93039172 | 0.967786781 |
| Trim50     | 4   | 65.75741331 | 65.05607079 | -0.701342523 | 0.93026979 | 0.967786781 |
| Zswim6     | 171 | 1.375638415 | 1.185933542 | -0.189704873 | 0.93050022 | 0.967831032 |
| Prkd3      | 76  | 1.556770074 | 1.386170698 | -0.170599376 | 0.93060818 | 0.967874723 |
| Dvl3       | 70  | 1.447477875 | 1.224906395 | -0.222571479 | 0.93076554 | 0.967969771 |
| Polr3c     | 10  | 2.08109834  | 2.213871466 | 0.132773126  | 0.93084502 | 0.967983832 |
| '00094K13F | 12  | 1.574641954 | 1.806240218 | 0.231598263  | 0.93096137 | 0.968036221 |
| Cox16      | 6   | 3.140575701 | 2.646846473 | -0.493729228 | 0.93138786 | 0.96839649  |
| Smim7      | 24  | 1.396301591 | 1.129390342 | -0.266911249 | 0.93143983 | 0.96839649  |
| Eef1g      | 9   | 1.019023157 | 1.06688796  | 0.047864803  | 0.93210101 | 0.968471585 |
| Smarca4    | 18  | 1.075714182 | 1.085193535 | 0.009479354  | 0.93159456 | 0.968471585 |
| Cfdp1      | 45  | 1.369659063 | 1.104870904 | -0.264788159 | 0.93193921 | 0.968471585 |
| Pwp1       | 21  | 1.732917806 | 1.335840204 | -0.397077602 | 0.93210605 | 0.968471585 |
| Elovl1     | 25  | 2.696776501 | 2.338968649 | -0.357807851 | 0.93210241 | 0.968471585 |
| Ehmt2      | 114 | 1.889807433 | 1.738752739 | -0.151054693 | 0.93201795 | 0.968471585 |
| Ttc25      | 19  | 0.864696685 | 1.146694503 | 0.281997818  | 0.93174226 | 0.968471585 |
| Capn2      | 77  | 1.253160785 | 1.073935237 | -0.179225548 | 0.93198071 | 0.968471585 |
| Ngfr       | 30  | 12.10736218 | 11.60914677 | -0.498215407 | 0.9318807  | 0.968471585 |
| Clpx       | 40  | 1.431732192 | 1.44782568  | 0.016093488  | 0.93221715 | 0.968478123 |
| Fbxo11     | 133 | 1.241120228 | 1.224778654 | -0.016341574 | 0.93224434 | 0.968478123 |
| Ccdc124    | 15  | 1.62548622  | 1.5461919   | -0.07929432  | 0.93232487 | 0.968493218 |
| Scn1b      | 79  | 1.347516927 | 1.410103734 | 0.062586807  | 0.93266225 | 0.968657503 |
| Oard1      | 15  | 1.106273012 | 0.741575825 | -0.364697187 | 0.93258747 | 0.968657503 |
| Gpr19      | 25  | 13.40753867 | 12.61126124 | -0.796277432 | 0.93268106 | 0.968657503 |
| Susd3      | 1   | 15.70247934 | 16.10169492 | 0.399215576  | 0.93275476 | 0.968665484 |
| Scg3       | 1   | 50          | 49.58333333 | -0.416666667 | 0.93286058 | 0.968706824 |
| Gpatch2l   | 21  | 1.287574535 | 1.19018808  | -0.097386455 | 0.93336597 | 0.969094473 |
| Htr1a      | 6   | 25.43181818 | 26.43528914 | 1.003470955  | 0.93330192 | 0.969094473 |
| '00012D14F | 14  | 1.68319592  | 1.802359981 | 0.119164061  | 0.9337644  | 0.969323062 |
| Dgcr2      | 23  | 1.270890055 | 0.957633653 | -0.313256403 | 0.9337843  | 0.969323062 |
| Cenpc1     | 15  | 0.911968551 | 0.864775139 | -0.047193412 | 0.93365392 | 0.969323062 |
| Tmem9b     | 62  | 1.384467099 | 1.582834884 | 0.198367785  | 0.93386727 | 0.969340623 |



|         |     |             |              |              |            |             |
|---------|-----|-------------|--------------|--------------|------------|-------------|
| Tmem168 | 32  | 1.658087637 | 1.582719269  | -0.075368368 | 0.93441237 | 0.969583963 |
| Olfr314 | 1   | 97.2972973  | 97.1659919   | -0.131305394 | 0.93443208 | 0.969583963 |
| Cyhr1   | 56  | 1.433317443 | 1.591416784  | 0.15809934   | 0.93431617 | 0.969583963 |
| Mir6916 | 9   | 93.1775465  | 94.04713868  | 0.869592184  | 0.93439585 | 0.969583963 |
| Lsm8    | 51  | 1.116252448 | 1.12257333   | 0.006320882  | 0.93435965 | 0.969583963 |
| Isg20   | 1   | 62.83185841 | 63.31360947  | 0.48175106   | 0.93452461 | 0.969611402 |
| Invs    | 30  | 1.708140807 | 1.247813889  | -0.460326919 | 0.93489773 | 0.969929955 |
| Morf4l1 | 14  | 1.273763567 | 1.097256208  | -0.176507359 | 0.93567583 | 0.970410895 |
| Armc6   | 30  | 1.437969765 | 1.250683893  | -0.187285872 | 0.93578535 | 0.970410895 |
| Hdac3   | 13  | 1.139955673 | 1.283623466  | 0.143667793  | 0.93582422 | 0.970410895 |
| Rrp1    | 22  | 0.996675881 | 1.137792483  | 0.141116602  | 0.93573236 | 0.970410895 |
| Zfp458  | 3   | 1.461219939 | 1.412429379  | -0.048790561 | 0.93580923 | 0.970410895 |
| Gm12669 | 47  | 1.201656779 | 1.112907577  | -0.088749203 | 0.93565114 | 0.970410895 |
| Spsb1   | 33  | 1.654407857 | 1.324509848  | -0.32989801  | 0.93566887 | 0.970410895 |
| Cahm    | 74  | 1.002921283 | 0.933606091  | -0.069315192 | 0.93595366 | 0.970476546 |
| Taf9    | 96  | 1.140844767 | 1.108228824  | -0.032615943 | 0.93668268 | 0.970986424 |
| Hey1    | 116 | 1.605370819 | 1.499612108  | -0.105758711 | 0.93670705 | 0.970986424 |
| Gmcl1   | 89  | 1.195112745 | 1.237908424  | 0.042795679  | 0.9366578  | 0.970986424 |
| Bmpr1a  | 154 | 1.380200711 | 1.30178768   | -0.078413031 | 0.93671009 | 0.970986424 |
| Rnf38   | 108 | 1.115178983 | 1.148267624  | 0.03308864   | 0.93680446 | 0.971015655 |
| Fbxl15  | 11  | 3.516264644 | 3.22140489   | -0.294859755 | 0.93692226 | 0.971069161 |
| Bcl7a   | 101 | 1.52316688  | 1.380197673  | -0.142969207 | 0.93701519 | 0.971093708 |
| Pi4k2a  | 58  | 1.079086585 | 0.875688347  | -0.203398237 | 0.93715362 | 0.971093708 |
| Zbtb33  | 58  | 18.4790323  | 18.89576956  | 0.416737264  | 0.93747232 | 0.971093708 |
| Fam195a | 25  | 1.359100587 | 1.494535513  | 0.135434927  | 0.93735707 | 0.971093708 |
| Abl2    | 56  | 1.545997437 | 1.430312522  | -0.115684915 | 0.93746198 | 0.971093708 |
| Cage1   | 14  | 1.651188212 | 1.614594147  | -0.036594066 | 0.93747536 | 0.971093708 |
| Fastkd2 | 2   | 4.255319149 | 4.444444444  | 0.189125296  | 0.93717479 | 0.971093708 |
| Pik3cb  | 132 | 0.991746776 | 0.9444460119 | -0.047286657 | 0.93732349 | 0.971093708 |
| Asf1b   | 52  | 1.542211745 | 1.499950111  | -0.042261634 | 0.93777248 | 0.971127271 |
| Tekt1   | 7   | 35.3820598  | 37.41223462  | 2.030174814  | 0.93765395 | 0.971127271 |
| Acp6    | 18  | 1.413105294 | 1.300598068  | -0.112507226 | 0.93771321 | 0.971127271 |
| Impa2   | 8   | 1.356950211 | 1.263872452  | -0.093077759 | 0.93774043 | 0.971127271 |
| Dhx34   | 6   | 0.650406504 | 0.528058993  | -0.122347511 | 0.93787892 | 0.971160447 |

|            |    |             |             |              |            |             |
|------------|----|-------------|-------------|--------------|------------|-------------|
| 230037L18F | 25 | 1.923343144 | 2.055855135 | 0.13251199   | 0.93806925 | 0.971160447 |
| Eefsec     | 40 | 1.460196773 | 1.221287504 | -0.238909269 | 0.93803216 | 0.971160447 |
| Llg1       | 62 | 1.159777456 | 1.086023094 | -0.073754363 | 0.93803601 | 0.971160447 |
| Slc30a9    | 83 | 1.376241935 | 1.371941294 | -0.004300641 | 0.93827802 | 0.97123954  |
| Pcdhgc4    | 12 | 11.16906953 | 11.45378635 | 0.284716822  | 0.93821881 | 0.97123954  |
| Rnf214     | 52 | 1.463880121 | 1.415357152 | -0.048522969 | 0.93854029 | 0.971305465 |
| Egfl6      | 2  | 22.87878788 | 22.25306838 | -0.625719498 | 0.93850039 | 0.971305465 |
| Cxxc4      | 13 | 1.033430161 | 1.231215132 | 0.197784972  | 0.93841436 | 0.971305465 |
| Dpy19l4    | 55 | 1.490676544 | 1.405598794 | -0.08507775  | 0.93910876 | 0.971825243 |
| Apbb1      | 12 | 1.050213925 | 0.892875281 | -0.157338644 | 0.93919574 | 0.97184672  |
| Poln       | 13 | 1.882310319 | 1.817816225 | -0.064494094 | 0.93926484 | 0.971849682 |
| Alkbh5     | 99 | 1.074461103 | 1.097554647 | 0.023093543  | 0.93938163 | 0.971901999 |
| H3f3b      | 56 | 1.25391264  | 1.238037193 | -0.015875448 | 0.93955476 | 0.971977028 |
| Pif1       | 7  | 2.411679705 | 1.547797161 | -0.863882544 | 0.93958663 | 0.971977028 |
| Pip4k2c    | 35 | 1.425094866 | 1.401344764 | -0.023750102 | 0.93973384 | 0.972060785 |
| Tspan3     | 53 | 1.645016943 | 1.313163461 | -0.331853482 | 0.93993196 | 0.972197192 |
| Appbp2os   | 24 | 0.795371153 | 0.913104571 | 0.117733418  | 0.94015044 | 0.97235463  |
| Al413582   | 42 | 1.719232102 | 1.315233929 | -0.403998173 | 0.94038032 | 0.972523845 |
| Uhrf1bp1l  | 47 | 1.772542342 | 1.776727244 | 0.004184901  | 0.94063668 | 0.972670922 |
| Haus8      | 23 | 1.285577646 | 1.229918936 | -0.05565871  | 0.94065511 | 0.972670922 |
| Ccnf       | 53 | 1.275629435 | 1.346581456 | 0.070952021  | 0.94095529 | 0.972775671 |
| 510005L07F | 13 | 24.3997978  | 21.40444019 | -2.995357611 | 0.94094451 | 0.972775671 |
| Map1a      | 23 | 7.521057411 | 7.392526037 | -0.128531374 | 0.94093099 | 0.972775671 |
| Lsm6       | 50 | 1.363215627 | 1.372675762 | 0.009460135  | 0.94106724 | 0.972822868 |
| Pex2       | 20 | 1.131401592 | 0.993361771 | -0.138039821 | 0.94132901 | 0.973024932 |
| Cbl        | 64 | 1.220430061 | 1.137000379 | -0.083429683 | 0.94139712 | 0.973026788 |
| Cops8      | 24 | 0.763974347 | 0.648085627 | -0.115888719 | 0.94152463 | 0.973090046 |
| Sidt2      | 38 | 1.316485394 | 1.287374978 | -0.029110416 | 0.94174381 | 0.973248024 |
| Snhg20     | 11 | 0.736362367 | 1.034062711 | 0.297700344  | 0.94214556 | 0.973594645 |
| Ddr1       | 81 | 12.87015415 | 11.96774247 | -0.902411684 | 0.94228179 | 0.973598295 |
| Tspyl1     | 27 | 1.103597934 | 0.940898309 | -0.162699625 | 0.94226591 | 0.973598295 |
| Got2       | 9  | 1.061129593 | 1.335625979 | 0.274496385  | 0.94238495 | 0.973636325 |
| Lyar       | 40 | 1.834880714 | 1.832225003 | -0.002655711 | 0.94251273 | 0.973699792 |
| Npc1       | 49 | 1.21566632  | 1.160518242 | -0.055148078 | 0.94276449 | 0.973822763 |

|            |     |             |             |              |            |             |
|------------|-----|-------------|-------------|--------------|------------|-------------|
| Chmp4b     | 42  | 1.217702219 | 1.127761704 | -0.089940515 | 0.94272689 | 0.973822763 |
| Smpd1      | 8   | 2.165069406 | 1.842169568 | -0.322899838 | 0.94320622 | 0.974073344 |
| Sesn2      | 77  | 1.335797358 | 1.535086983 | 0.199289626  | 0.94319556 | 0.974073344 |
| Slbp       | 16  | 0.81703657  | 0.990655323 | 0.173618752  | 0.94316586 | 0.974073344 |
| Kdm4c      | 53  | 1.177151124 | 1.032198557 | -0.144952567 | 0.94360342 | 0.974377419 |
| Atxn7      | 70  | 1.532746079 | 1.397163029 | -0.135583051 | 0.94363347 | 0.974377419 |
| Zc3h11a    | 26  | 1.429999299 | 1.409408795 | -0.020590503 | 0.94415624 | 0.974437236 |
| Xrcc2      | 19  | 1.661086825 | 1.306836602 | -0.354250223 | 0.94411697 | 0.974437236 |
| Anapc15    | 10  | 1.576893181 | 1.718869947 | 0.141976766  | 0.94379972 | 0.974437236 |
| Usp15      | 55  | 1.884885242 | 1.777229255 | -0.107655987 | 0.94399435 | 0.974437236 |
| E2f1       | 78  | 1.188175873 | 1.107886108 | -0.080289764 | 0.94402976 | 0.974437236 |
| Tubb2b     | 7   | 1.26984127  | 1.07022607  | -0.1996152   | 0.94385132 | 0.974437236 |
| Sumo1      | 37  | 1.205559933 | 1.157534817 | -0.048025116 | 0.94395519 | 0.974437236 |
| Tmod3      | 39  | 1.29495958  | 1.234391673 | -0.060567907 | 0.94459018 | 0.974747978 |
| Rps21      | 16  | 1.193792699 | 1.081795892 | -0.111996808 | 0.94457993 | 0.974747978 |
| Pou4f1     | 114 | 10.50709334 | 11.1444934  | 0.637400059  | 0.94503547 | 0.975089789 |
| Cenpp      | 18  | 1.233401049 | 0.983476491 | -0.249924558 | 0.94512076 | 0.975089789 |
| Usp30      | 65  | 1.36604485  | 1.347628035 | -0.018416815 | 0.9451047  | 0.975089789 |
| Dtx4       | 39  | 1.458789636 | 1.142069688 | -0.316719948 | 0.94537401 | 0.975282495 |
| Pde7a      | 168 | 1.131965339 | 1.032347587 | -0.099617753 | 0.94549337 | 0.97533706  |
| Ctdsp2     | 41  | 5.936508946 | 5.668248743 | -0.268260203 | 0.94561994 | 0.975399055 |
| Prkca      | 100 | 1.200876235 | 1.228567579 | 0.027691344  | 0.94569481 | 0.975407717 |
| Spry1      | 49  | 0.936415905 | 0.858868671 | -0.077547234 | 0.94586054 | 0.975510089 |
| Ccdc51     | 10  | 1.718001068 | 1.50034057  | -0.217660498 | 0.94599475 | 0.975579943 |
| Ubr7       | 47  | 1.26051717  | 1.354652806 | 0.094135637  | 0.94635463 | 0.975882486 |
| Zfp688     | 19  | 0.977052723 | 1.475516423 | 0.4984637    | 0.94643951 | 0.975901441 |
| Spdl1      | 35  | 1.72920816  | 1.571016375 | -0.158191785 | 0.94656337 | 0.975960573 |
| Trip10     | 8   | 2.321782635 | 1.975560398 | -0.346222237 | 0.94680107 | 0.976137067 |
| Trp53      | 1   | 4.705882353 | 4.494382022 | -0.21150033  | 0.94691696 | 0.976187959 |
| Napepld    | 14  | 2.702483351 | 2.001932248 | -0.700551103 | 0.94698759 | 0.976192199 |
| Ndufs5     | 27  | 1.385239802 | 1.557459351 | 0.172219549  | 0.94760668 | 0.976727593 |
| !30046K03F | 68  | 0.764418014 | 0.619822446 | -0.144595568 | 0.94764009 | 0.976727593 |
| Gm12191    | 2   | 0.434782609 | 0.612244898 | 0.177462289  | 0.9477709  | 0.976793809 |
| Ypel1      | 43  | 1.219717121 | 1.588151728 | 0.368434607  | 0.94801222 | 0.976962184 |

|            |     |             |             |              |            |             |
|------------|-----|-------------|-------------|--------------|------------|-------------|
| Kdelr3     | 10  | 1.025523831 | 1.540767586 | 0.515243755  | 0.94806743 | 0.976962184 |
| i10012G03F | 67  | 1.353659065 | 1.155682326 | -0.197976739 | 0.94881631 | 0.977253496 |
| Mob1a      | 50  | 1.263353784 | 1.18136582  | -0.081987964 | 0.94881287 | 0.977253496 |
| Ncoa5      | 48  | 1.049404899 | 1.131199897 | 0.081794998  | 0.94864239 | 0.977253496 |
| Sp5        | 28  | 10.87721919 | 11.14006053 | 0.262841339  | 0.94879719 | 0.977253496 |
| Gpr12      | 45  | 50.05775407 | 50.00270445 | -0.05504962  | 0.94878475 | 0.977253496 |
| Scd2       | 7   | 2.351351949 | 2.401522333 | 0.050170383  | 0.94849838 | 0.977253496 |
| i10315B03F | 9   | 1.506189588 | 1.880827974 | 0.374638387  | 0.94881473 | 0.977253496 |
| Pnp        | 16  | 1.753721774 | 1.239098241 | -0.514623533 | 0.94904446 | 0.977351283 |
| Cyb5r1     | 27  | 1.351074609 | 1.423434481 | 0.072359872  | 0.94897903 | 0.977351283 |
| Bccip      | 9   | 1.454243226 | 1.152893198 | -0.301350028 | 0.94915144 | 0.977392857 |
| Wars       | 14  | 1.693564972 | 1.434311846 | -0.259253126 | 0.94946574 | 0.977594093 |
| Timm21     | 35  | 1.358112473 | 1.416464186 | 0.058351712  | 0.9494801  | 0.977594093 |
| i10306M01F | 17  | 1.712515522 | 1.629309999 | -0.083205523 | 0.94994662 | 0.977848383 |
| Dvl1       | 100 | 2.284713854 | 2.295899833 | 0.011185979  | 0.94988755 | 0.977848383 |
| Wdr35      | 17  | 1.430221551 | 1.768141736 | 0.337920185  | 0.94999363 | 0.977848383 |
| Vsx2       | 37  | 25.80325637 | 27.8950879  | 2.091831528  | 0.94981573 | 0.977848383 |
| Peli3      | 27  | 2.39981104  | 1.880654082 | -0.519156958 | 0.95014354 | 0.977905665 |
| Sec62      | 35  | 1.044814521 | 1.204765957 | 0.159951436  | 0.95018257 | 0.977905665 |
| Klhdc2     | 77  | 1.230554552 | 1.124235833 | -0.106318719 | 0.95040435 | 0.977928159 |
| Pmm2       | 22  | 1.608323374 | 1.576850519 | -0.031472855 | 0.95039524 | 0.977928159 |
| Tmem134    | 21  | 1.472408289 | 1.419803391 | -0.052604898 | 0.95035299 | 0.977928159 |
| Ccdc106    | 13  | 36.6584943  | 38.56566841 | 1.907174104  | 0.95073439 | 0.978199156 |
| Hist1h3e   | 6   | 0.880990355 | 1.575075075 | 0.69408472   | 0.95102972 | 0.978312687 |
| Slc35a4    | 23  | 1.868418229 | 1.59734809  | -0.271070139 | 0.95103094 | 0.978312687 |
| Itfg1      | 50  | 1.095079448 | 1.214448183 | 0.119368735  | 0.95104474 | 0.978312687 |
| Snrpd3     | 8   | 2.146742198 | 2.289339186 | 0.142596988  | 0.95190684 | 0.97909613  |
| i10057O12F | 13  | 2.325040952 | 2.210866366 | -0.114174586 | 0.95193979 | 0.97909613  |
| Setx       | 36  | 1.374703418 | 1.246036782 | -0.128666636 | 0.95205939 | 0.979150507 |
| Pacsin2    | 43  | 1.064733268 | 0.853490826 | -0.211242442 | 0.95220948 | 0.979234624 |
| Lrrc42     | 51  | 1.708901725 | 1.700250856 | -0.008650869 | 0.95234137 | 0.979234624 |
| Nsfl1c     | 3   | 1.459854015 | 0.979245499 | -0.480608515 | 0.95231237 | 0.979234624 |
| Pdp1       | 110 | 1.387689608 | 1.210662975 | -0.177026633 | 0.95242393 | 0.979250889 |
| Rab20      | 46  | 2.597024363 | 3.147310421 | 0.550286058  | 0.95260304 | 0.979366426 |

|            |    |             |             |              |            |             |
|------------|----|-------------|-------------|--------------|------------|-------------|
| Mgat5      | 17 | 1.234616908 | 1.461448752 | 0.226831843  | 0.95292156 | 0.979419416 |
| Klhl42     | 19 | 0.808082634 | 1.041465764 | 0.23338313   | 0.95286938 | 0.979419416 |
| Maml1      | 53 | 1.282638161 | 1.038627798 | -0.244010363 | 0.95276863 | 0.979419416 |
| C1rb       | 3  | 8.591065292 | 8.712121212 | 0.12105592   | 0.95290482 | 0.979419416 |
| Sec23b     | 11 | 0.824362351 | 0.948642989 | 0.124280638  | 0.95317201 | 0.979608214 |
| Tmem189    | 94 | 1.282819    | 1.309317365 | 0.026498365  | 0.95338482 | 0.979689693 |
| Spryd3     | 67 | 1.766544332 | 1.75902812  | -0.007516213 | 0.95337087 | 0.979689693 |
| Atp5c1     | 14 | 1.855308428 | 2.031409565 | 0.176101137  | 0.95362118 | 0.979863954 |
| Itga3      | 52 | 4.721182341 | 4.767786881 | 0.04660454   | 0.95406081 | 0.979972587 |
| Akap8l     | 8  | 1.329677498 | 1.437635371 | 0.107957873  | 0.95388106 | 0.979972587 |
| Spc25      | 13 | 0.809412259 | 0.866012292 | 0.056600033  | 0.95400323 | 0.979972587 |
| Cuedc2     | 14 | 1.48177561  | 1.391438725 | -0.090336885 | 0.95386694 | 0.979972587 |
| Txndc17    | 32 | 1.322821492 | 1.456068423 | 0.133246931  | 0.95398497 | 0.979972587 |
| Ergic3     | 17 | 1.298755425 | 1.050850007 | -0.247905418 | 0.95466362 | 0.980523128 |
| Cpeb3      | 41 | 1.210001523 | 0.907642729 | -0.302358794 | 0.95492987 | 0.980659309 |
| Lonrf3     | 23 | 62.28127821 | 62.31687921 | 0.035600993  | 0.9548647  | 0.980659309 |
| Slk        | 70 | 0.846080728 | 0.906546539 | 0.060465812  | 0.95501315 | 0.980676205 |
| Klhl41     | 5  | 96.65485672 | 96.32894508 | -0.325911636 | 0.95515432 | 0.980752538 |
| Ska3       | 9  | 0.168350168 | 0.254066921 | 0.085716752  | 0.95537187 | 0.980907277 |
| Kdm1a      | 27 | 1.495757367 | 1.108319328 | -0.387438039 | 0.95549324 | 0.980957801 |
| Slc39a1    | 20 | 1.364950133 | 1.766388627 | 0.401438493  | 0.95555478 | 0.980957801 |
| Fam161b    | 5  | 2.942976804 | 2.926403316 | -0.016573488 | 0.95606453 | 0.981412447 |
| Lrrc47     | 96 | 0.841228089 | 0.909251178 | 0.06802309   | 0.95625497 | 0.98153927  |
| Cyld       | 33 | 1.010919839 | 0.945354871 | -0.065564967 | 0.95640667 | 0.981626321 |
| Osbp19     | 19 | 2.064632101 | 1.830350422 | -0.234281679 | 0.95652438 | 0.981678471 |
| Slc4a11    | 25 | 1.492006052 | 1.080006394 | -0.411999658 | 0.95664927 | 0.981737983 |
| Ppard      | 28 | 1.221069087 | 0.812184195 | -0.408884892 | 0.95698039 | 0.981940439 |
| Pura       | 62 | 1.173911816 | 1.103519584 | -0.070392233 | 0.95692024 | 0.981940439 |
| Tmem115    | 24 | 1.16674611  | 0.936574529 | -0.230171581 | 0.95708459 | 0.981978694 |
| Psma6      | 34 | 1.659046752 | 1.266839996 | -0.392206756 | 0.95717374 | 0.982001497 |
| Cyp4f41-ps | 6  | 2.712395132 | 2.778430713 | 0.066035581  | 0.95730597 | 0.982068495 |
| Cep250     | 38 | 1.212847601 | 1.192591028 | -0.020256573 | 0.95758903 | 0.982290206 |
| Fbxo10     | 80 | 1.293379831 | 1.227963899 | -0.065415932 | 0.95771891 | 0.982354767 |
| Zfp110     | 22 | 1.311792944 | 1.302650861 | -0.009142083 | 0.95789717 | 0.982468941 |

|           |     |             |             |              |            |             |
|-----------|-----|-------------|-------------|--------------|------------|-------------|
| Brms1l    | 77  | 1.473532206 | 1.321702114 | -0.151830092 | 0.95822403 | 0.982693283 |
| Rnf114    | 34  | 3.890297086 | 3.738238808 | -0.152058278 | 0.95838024 | 0.982693283 |
| Rnf219    | 40  | 1.024083999 | 0.881720116 | -0.142363882 | 0.9583617  | 0.982693283 |
| Zbtb26    | 10  | 2.613584717 | 3.110502881 | 0.496918163  | 0.95838378 | 0.982693283 |
| Atm       | 26  | 1.247061619 | 1.159342896 | -0.087718724 | 0.95849489 | 0.982738541 |
| Ccdc122   | 22  | 1.33639079  | 1.265554356 | -0.070836434 | 0.95881431 | 0.982997354 |
| Aimp2     | 20  | 1.193945683 | 0.958169786 | -0.235775898 | 0.95900347 | 0.983122601 |
| Plekhf2   | 116 | 1.316248647 | 1.117475882 | -0.198772765 | 0.95923081 | 0.983286967 |
| Med4      | 29  | 1.906407633 | 1.878653482 | -0.027754151 | 0.95932384 | 0.983313636 |
| Igfbp1    | 1   | 20          | 19.73684211 | -0.263157895 | 0.95977385 | 0.983576606 |
| Flnb      | 27  | 1.516329307 | 1.371125236 | -0.145204072 | 0.95978148 | 0.983576606 |
| Slc35b3   | 60  | 1.397429871 | 1.168197753 | -0.229232118 | 0.95968702 | 0.983576606 |
| Mat2b     | 34  | 1.357655948 | 1.612415045 | 0.254759097  | 0.96011053 | 0.98384511  |
| Gpc6      | 2   | 3.296703297 | 3.415401703 | 0.118698406  | 0.96046625 | 0.98400347  |
| Gm10638   | 109 | 0.904897822 | 0.984476073 | 0.079578251  | 0.96034372 | 0.98400347  |
| Nck2      | 91  | 1.213988788 | 1.153729915 | -0.060258873 | 0.9604518  | 0.98400347  |
| Ubac1     | 49  | 1.94207663  | 2.071579749 | 0.129503118  | 0.96067026 | 0.984017754 |
| Zfp292    | 88  | 1.113223278 | 1.069558188 | -0.04366509  | 0.96068136 | 0.984017754 |
| Ybx3      | 107 | 1.035720575 | 0.946476265 | -0.089244311 | 0.96056057 | 0.984017754 |
| Atad5     | 29  | 1.782098209 | 1.729212081 | -0.052886128 | 0.96085056 | 0.984122365 |
| Plxna2    | 46  | 1.343066277 | 1.439408603 | 0.096342326  | 0.96092291 | 0.984127774 |
| Ubp2      | 20  | 1.889673696 | 2.19230175  | 0.302628054  | 0.96101543 | 0.984153845 |
| Panx1     | 54  | 1.421836307 | 1.298563022 | -0.123273285 | 0.96122892 | 0.984303785 |
| Slc31a1   | 19  | 2.197509366 | 2.025959257 | -0.171550109 | 0.96196501 | 0.984888859 |
| Nfkbie    | 36  | 1.710305479 | 1.689162693 | -0.021142786 | 0.96200164 | 0.984888859 |
| Mir7024   | 4   | 92.9104099  | 93.56113215 | 0.650722244  | 0.96191801 | 0.984888859 |
| Hells     | 65  | 1.216747069 | 1.017637733 | -0.199109336 | 0.96255286 | 0.985384447 |
| Lsm14b    | 81  | 1.231314487 | 1.165174847 | -0.066139641 | 0.96270091 | 0.985400568 |
| Sdcbp     | 19  | 1.686613485 | 1.651085751 | -0.035527734 | 0.96270291 | 0.985400568 |
| Dgat2     | 37  | 1.791498701 | 1.547768238 | -0.243730463 | 0.96293794 | 0.985572392 |
| Oxct1     | 32  | 1.221409096 | 1.118556974 | -0.102852123 | 0.96320006 | 0.98577191  |
| 00014J11R | 58  | 1.298088008 | 1.079153449 | -0.218934559 | 0.96337691 | 0.985790318 |
| Lin9      | 109 | 1.075000082 | 1.272061119 | 0.197061037  | 0.96341958 | 0.985790318 |
| Ubxn11    | 11  | 0.307319304 | 0.371057514 | 0.06373821   | 0.963315   | 0.985790318 |

|          |     |             |             |              |            |             |
|----------|-----|-------------|-------------|--------------|------------|-------------|
| Senp1    | 14  | 1.544443188 | 1.211204079 | -0.33323911  | 0.96360852 | 0.985846153 |
| Gltscr2  | 19  | 1.911179999 | 1.539856131 | -0.371323867 | 0.96355015 | 0.985846153 |
| Med15    | 16  | 1.889092774 | 1.825045539 | -0.064047234 | 0.96403822 | 0.986217012 |
| Snai1    | 40  | 2.157242003 | 2.002291194 | -0.154950809 | 0.96410865 | 0.986220307 |
| Kbtbd2   | 96  | 1.004614488 | 0.990415752 | -0.014198736 | 0.96417857 | 0.986223086 |
| Ogdh     | 63  | 1.511922175 | 1.276968583 | -0.234953592 | 0.96445616 | 0.98636951  |
| Prune2   | 11  | 1.259446727 | 1.34808627  | 0.088639543  | 0.96439511 | 0.98636951  |
| Elavl1   | 56  | 1.052093108 | 0.951669405 | -0.100423703 | 0.96455194 | 0.986398718 |
| Mir574   | 19  | 1.262070891 | 1.37263904  | 0.110568149  | 0.96476012 | 0.986474112 |
| Dhrs7    | 18  | 1.479117533 | 1.254708496 | -0.224409037 | 0.96475406 | 0.986474112 |
| Dicer1   | 108 | 1.017830303 | 1.003047383 | -0.01478292  | 0.96488496 | 0.986511498 |
| Vps11    | 23  | 1.237386175 | 1.254110357 | 0.016724182  | 0.96493114 | 0.986511498 |
| Sltm     | 113 | 1.24932669  | 1.103525633 | -0.145801056 | 0.96513644 | 0.98665265  |
| Dnajb2   | 35  | 1.946859155 | 1.655405882 | -0.291453273 | 0.96536423 | 0.986816767 |
| Ap3b2    | 43  | 14.8316029  | 15.23549903 | 0.403896129  | 0.96554409 | 0.986931879 |
| Tmem219  | 25  | 1.257922852 | 1.22371367  | -0.034209181 | 0.96567623 | 0.986998188 |
| Pcmt1    | 54  | 1.161905046 | 1.091217393 | -0.070687653 | 0.96591174 | 0.987170142 |
| 3-Mar    | 27  | 1.33552031  | 1.334785275 | -0.000735034 | 0.96617025 | 0.987365573 |
| Heatr9   | 1   | 76.47058824 | 76.74418605 | 0.273597811  | 0.96629362 | 0.987422884 |
| Fam160b1 | 67  | 1.536786965 | 1.333376898 | -0.203410067 | 0.96650341 | 0.987499726 |
| Acad8    | 8   | 1.620939409 | 1.234192358 | -0.386747051 | 0.96648725 | 0.987499726 |
| Arpc2    | 53  | 1.078007914 | 0.971955338 | -0.106052575 | 0.9668712  | 0.987600445 |
| Stk3     | 73  | 1.149750294 | 1.186566787 | 0.036816493  | 0.96671102 | 0.987600445 |
| Atp6v0d1 | 50  | 1.282434783 | 1.239149604 | -0.043285179 | 0.96682103 | 0.987600445 |
| Nupl1    | 68  | 0.971022145 | 0.990308081 | 0.019285936  | 0.96684534 | 0.987600445 |
| Tns3     | 52  | 1.085706288 | 1.049704868 | -0.03600142  | 0.96701087 | 0.987667269 |
| Lysmd3   | 54  | 0.986235592 | 0.796297954 | -0.189937637 | 0.96707124 | 0.987667269 |
| Nrm      | 24  | 1.065664395 | 1.119267675 | 0.05360328   | 0.9671471  | 0.987676008 |
| Fryl     | 68  | 1.304128815 | 1.385597909 | 0.081469094  | 0.96725017 | 0.987712527 |
| Smpd2    | 14  | 1.353261101 | 1.244430121 | -0.10883098  | 0.96751614 | 0.987915378 |
| Chsy1    | 162 | 1.248616235 | 1.077523028 | -0.171093207 | 0.96758627 | 0.987918244 |
| Plau     | 2   | 0.649350649 | 0.613496933 | -0.035853717 | 0.96776214 | 0.987918481 |
| Eif3a    | 67  | 0.901744822 | 0.889803886 | -0.011940936 | 0.96778848 | 0.987918481 |
| Pogk     | 63  | 1.929548518 | 1.546931572 | -0.382616946 | 0.96772622 | 0.987918481 |

|            |     |             |             |              |            |             |
|------------|-----|-------------|-------------|--------------|------------|-------------|
| Dnajc5g    | 8   | 86.70153244 | 88.28812237 | 1.586589929  | 0.96810357 | 0.988171385 |
| Gm6793     | 47  | 1.1589191   | 1.067071722 | -0.091847378 | 0.96854535 | 0.988484802 |
| 130467D21F | 16  | 88.34733155 | 88.17050094 | -0.17683061  | 0.96854088 | 0.988484802 |
| Nelfcd     | 9   | 1.620180734 | 1.327284053 | -0.29289668  | 0.96865331 | 0.988526235 |
| Gm5        | 4   | 92.79308622 | 93.13426195 | 0.34117573   | 0.96880272 | 0.988609956 |
| Elmo2      | 82  | 6.22689195  | 6.11655758  | -0.110334371 | 0.96909396 | 0.988809949 |
| Rpl36al    | 53  | 1.265732904 | 1.387889526 | 0.122156622  | 0.96940302 | 0.988809949 |
| Dbf4       | 64  | 1.229870521 | 1.089211173 | -0.140659348 | 0.96937877 | 0.988809949 |
| Gm17296    | 108 | 1.088017942 | 0.921895991 | -0.166121951 | 0.96927878 | 0.988809949 |
| Inpp1      | 39  | 1.545881424 | 1.484610041 | -0.061271383 | 0.96925131 | 0.988809949 |
| B3gnt2     | 69  | 1.041931469 | 1.113891715 | 0.071960246  | 0.96940263 | 0.988809949 |
| Heatr3     | 4   | 0.649350649 | 0.602409639 | -0.046941011 | 0.96969451 | 0.988943891 |
| Txlna      | 8   | 1.300020968 | 1.020302759 | -0.279718208 | 0.9704752  | 0.988943891 |
| Rras2      | 55  | 1.112063661 | 1.098326005 | -0.013737657 | 0.97026092 | 0.988943891 |
| Ifngr1     | 8   | 1.70454884  | 1.698674423 | -0.005874418 | 0.9704294  | 0.988943891 |
| Vrk1       | 22  | 2.191942903 | 2.360909905 | 0.168967002  | 0.96975971 | 0.988943891 |
| Tnfrsf21   | 48  | 1.253212549 | 1.340563566 | 0.087351018  | 0.97053198 | 0.988943891 |
| Reep4      | 24  | 0.841766332 | 0.735857916 | -0.105908416 | 0.97027397 | 0.988943891 |
| Tgfa       | 40  | 1.325089221 | 1.398161366 | 0.073072145  | 0.97044388 | 0.988943891 |
| Prcp       | 34  | 1.687827624 | 1.943390723 | 0.255563098  | 0.97081384 | 0.988943891 |
| Trappc6a   | 17  | 1.391367981 | 1.557945763 | 0.166577782  | 0.96992518 | 0.988943891 |
| Tnfrsf14   | 1   | 9.677419355 | 9.523809524 | -0.153609831 | 0.97078763 | 0.988943891 |
| Arhgap19   | 28  | 1.426028338 | 1.321208038 | -0.1048203   | 0.9705125  | 0.988943891 |
| Fam227b    | 20  | 1.613069374 | 1.404649372 | -0.208420001 | 0.97012773 | 0.988943891 |
| .10045C21F | 20  | 1.462899631 | 1.273706038 | -0.189193594 | 0.97036557 | 0.988943891 |
| Col18a1    | 17  | 38.78959854 | 38.39330329 | -0.396295255 | 0.96980629 | 0.988943891 |
| Cyb5d1     | 4   | 0.610204082 | 0.646464646 | 0.036260565  | 0.97016249 | 0.988943891 |
| Msgn1      | 4   | 93.32686811 | 92.95594132 | -0.370926787 | 0.97081483 | 0.988943891 |
| Dclre1a    | 1   | 6.542056075 | 6.474820144 | -0.067235931 | 0.97071415 | 0.988943891 |
| Npm3       | 72  | 1.412127878 | 1.213908908 | -0.19821897  | 0.97063506 | 0.988943891 |
| Ino80d     | 125 | 1.425188039 | 1.29288015  | -0.13230789  | 0.9708911  | 0.988952936 |
| Nudt14     | 48  | 1.790406103 | 1.669389266 | -0.121016838 | 0.97146282 | 0.989466611 |
| BC030867   | 22  | 1.613373465 | 1.636121493 | 0.022748028  | 0.97186745 | 0.989810032 |
| Tnfaip1    | 15  | 1.31392457  | 1.238225561 | -0.075699009 | 0.97194165 | 0.989816906 |



|           |     |             |             |              |            |             |
|-----------|-----|-------------|-------------|--------------|------------|-------------|
| Pdia3     | 67  | 1.229025713 | 1.161700347 | -0.067325367 | 0.97233357 | 0.990147313 |
| 30401M01f | 44  | 1.254201171 | 1.248219626 | -0.005981545 | 0.97284026 | 0.990388375 |
| Ccdc126   | 11  | 1.534485763 | 1.306264395 | -0.228221369 | 0.9727527  | 0.990388375 |
| Rb1cc1    | 78  | 1.081831167 | 1.146622509 | 0.064791342  | 0.97267145 | 0.990388375 |
| Slc13a5   | 13  | 13.63291505 | 14.54972477 | 0.916809726  | 0.97282421 | 0.990388375 |
| Uba2      | 53  | 3.027800169 | 2.639530326 | -0.388269843 | 0.97299126 | 0.990473375 |
| Ing2      | 118 | 1.158789617 | 1.261907309 | 0.103117692  | 0.97306749 | 0.990482267 |
| Wdpcp     | 7   | 1.18861024  | 0.932714649 | -0.255895592 | 0.97329843 | 0.990648625 |
| Micall1   | 111 | 1.198351608 | 1.290575692 | 0.092224085  | 0.97338704 | 0.990670099 |
| Ccp110    | 20  | 2.315895222 | 2.365322665 | 0.049427443  | 0.97347511 | 0.99069102  |
| Aire      | 6   | 6.310679612 | 7.495837007 | 1.185157395  | 0.9737412  | 0.990893095 |
| Ppp6c     | 51  | 1.032048374 | 0.966340246 | -0.065708128 | 0.97386145 | 0.990946741 |
| Cep76     | 114 | 1.180023316 | 1.216972321 | 0.036949005  | 0.97429952 | 0.991082059 |
| Nop56     | 57  | 1.209518879 | 1.057581368 | -0.151937511 | 0.97421845 | 0.991082059 |
| Endod1    | 62  | 1.799697081 | 1.445310617 | -0.354386464 | 0.97439968 | 0.991082059 |
| Nat9      | 17  | 1.120554405 | 0.9860298   | -0.134524605 | 0.97414037 | 0.991082059 |
| Fam210b   | 43  | 1.692696936 | 1.708386534 | 0.015689598  | 0.9743507  | 0.991082059 |
| Pomt2     | 23  | 1.471826765 | 1.552682169 | 0.080855404  | 0.97431326 | 0.991082059 |
| U2surp    | 34  | 0.980873074 | 0.986692476 | 0.005819402  | 0.9745414  | 0.991157507 |
| Far1      | 77  | 0.984555222 | 1.007067931 | 0.022512708  | 0.97470365 | 0.991253817 |
| Tmx2      | 10  | 2.424327104 | 2.195872684 | -0.228454421 | 0.97498936 | 0.991256688 |
| Grid1     | 129 | 34.99057225 | 36.31940919 | 1.328836941  | 0.97511178 | 0.991256688 |
| Eif2a     | 62  | 1.505321665 | 1.399212765 | -0.106108899 | 0.97483446 | 0.991256688 |
| Med19     | 10  | 2.424327104 | 2.195872684 | -0.228454421 | 0.97498936 | 0.991256688 |
| Copa      | 2   | 1.470588235 | 1.530612245 | 0.06002401   | 0.97486657 | 0.991256688 |
| Ccdc77    | 52  | 1.156123241 | 1.301097934 | 0.144974692  | 0.97505407 | 0.991256688 |
| Alox12e   | 2   | 20.02723312 | 18.51342261 | -1.513810502 | 0.97524511 | 0.991323547 |
| Hmga1     | 85  | 1.132148185 | 1.158260017 | 0.026111832  | 0.97543762 | 0.991450557 |
| Zfp760    | 20  | 1.48100625  | 1.178288491 | -0.302717759 | 0.97574873 | 0.991487378 |
| P4hb      | 94  | 1.065633344 | 0.942725843 | -0.122907501 | 0.97555265 | 0.991487378 |
| 30003M21f | 6   | 3.774250441 | 3.380245272 | -0.394005169 | 0.97564892 | 0.991487378 |
| Tmem143   | 8   | 0.35294313  | 0.517800865 | 0.164857735  | 0.97601439 | 0.991487378 |
| Depdc5    | 23  | 1.744193325 | 1.630967744 | -0.11322558  | 0.97588978 | 0.991487378 |
| Ywhag     | 27  | 1.209472694 | 0.925243607 | -0.284229086 | 0.97583986 | 0.991487378 |

|           |     |             |             |              |            |             |
|-----------|-----|-------------|-------------|--------------|------------|-------------|
| Mesdc1    | 82  | 1.2594501   | 1.133873836 | -0.125576264 | 0.97595819 | 0.991487378 |
| Hs2st1    | 61  | 0.96040392  | 0.848792339 | -0.111611581 | 0.97601109 | 0.991487378 |
| Pyurf     | 24  | 1.986819516 | 1.833708815 | -0.1531107   | 0.97641851 | 0.991571185 |
| Mir7069   | 2   | 88.65384615 | 84.75732601 | -3.896520147 | 0.9764409  | 0.991571185 |
| Fxyd5     | 6   | 0.974702381 | 0.782828283 | -0.191874098 | 0.97644768 | 0.991571185 |
| Gab2      | 111 | 1.332679156 | 1.440450153 | 0.107770997  | 0.97643084 | 0.991571185 |
| Lgals8    | 14  | 1.185044946 | 1.322055138 | 0.137010192  | 0.97623822 | 0.991571185 |
| Pofut2    | 42  | 1.651895291 | 1.212538561 | -0.43935673  | 0.97650233 | 0.991571185 |
| Kctd6     | 96  | 1.014127817 | 0.871321659 | -0.142806159 | 0.97680554 | 0.99181044  |
| Dolpp1    | 48  | 1.171775136 | 1.099305423 | -0.072469713 | 0.97695794 | 0.991896549 |
| Mrpl38    | 74  | 1.477869051 | 1.291171055 | -0.186697996 | 0.97726327 | 0.991951161 |
| Dcaf4     | 12  | 2.025910581 | 1.146803387 | -0.879107195 | 0.97719604 | 0.991951161 |
| Plagl1    | 10  | 54.70360589 | 55.02393048 | 0.320324589  | 0.97734973 | 0.991951161 |
| Shmt1     | 10  | 1.030893989 | 0.931375026 | -0.099518962 | 0.97711224 | 0.991951161 |
| Mfsd2b    | 4   | 25.41472416 | 23.93937339 | -1.475350777 | 0.97730152 | 0.991951161 |
| Tbc1d12   | 60  | 1.264170355 | 1.230920709 | -0.033249646 | 0.97778075 | 0.99208204  |
| Ddx59     | 29  | 1.042281038 | 1.038878638 | -0.0034024   | 0.97768848 | 0.99208204  |
| Ttl       | 54  | 1.146533995 | 1.155989092 | 0.009455097  | 0.97761877 | 0.99208204  |
| Mtmr12    | 68  | 1.002309551 | 1.0048372   | 0.002527649  | 0.9776512  | 0.99208204  |
| Rab17     | 2   | 18.15199563 | 18.30985915 | 0.157863529  | 0.97781672 | 0.99208204  |
| Sertad2   | 136 | 1.501609642 | 1.387100108 | -0.114509533 | 0.97803187 | 0.99216313  |
| Pigw      | 97  | 1.167484651 | 1.206714172 | 0.039229521  | 0.9780285  | 0.99216313  |
| Slc30a5   | 27  | 0.844939469 | 0.70081988  | -0.14411959  | 0.97838267 | 0.992450387 |
| Papd5     | 91  | 0.944123119 | 0.882822136 | -0.061300983 | 0.97861627 | 0.992618729 |
| Ube2e3    | 129 | 1.180127172 | 1.262609693 | 0.082482521  | 0.97890509 | 0.992843051 |
| Vps37a    | 60  | 1.567947401 | 1.572582064 | 0.004634663  | 0.9789967  | 0.992849266 |
| Dusp10    | 15  | 1.785438806 | 1.302068429 | -0.483370377 | 0.97904654 | 0.992849266 |
| Uqcrh     | 3   | 1.228070175 | 1.255230126 | 0.02715995   | 0.97961411 | 0.993282008 |
| Psm11     | 72  | 1.535277178 | 1.414215663 | -0.121061515 | 0.97974402 | 0.993282008 |
| Mepce     | 8   | 0.148809524 | 0.135869565 | -0.012939959 | 0.97960725 | 0.993282008 |
| 10320M18f | 28  | 1.098309663 | 1.127830614 | 0.029520952  | 0.97967811 | 0.993282008 |
| Tmem50b   | 58  | 1.407981004 | 1.402136778 | -0.005844226 | 0.97990937 | 0.993304241 |
| Myt1      | 1   | 7.692307692 | 7.575757576 | -0.116550117 | 0.97996114 | 0.993304241 |
| Zmym4     | 96  | 1.551948935 | 1.463177575 | -0.088771361 | 0.97996903 | 0.993304241 |

|            |     |             |             |              |            |             |
|------------|-----|-------------|-------------|--------------|------------|-------------|
| Jade1      | 76  | 17.17985467 | 16.88180989 | -0.298044773 | 0.98019836 | 0.99333085  |
| .10059G10F | 14  | 2.134470322 | 1.592427208 | -0.542043113 | 0.98015967 | 0.99333085  |
| Tdrd9      | 6   | 92.1568752  | 91.55553963 | -0.60133557  | 0.98010094 | 0.99333085  |
| Tmtc2      | 34  | 1.198709243 | 1.208684382 | 0.009975139  | 0.98054665 | 0.993420567 |
| Cish       | 19  | 2.027029632 | 2.09156516  | 0.064535528  | 0.98052299 | 0.993420567 |
| Naa35      | 93  | 1.199584127 | 1.260799196 | 0.06121507   | 0.98055769 | 0.993420567 |
| Zfp174     | 20  | 1.986170128 | 1.831144974 | -0.155025155 | 0.98051098 | 0.993420567 |
| Tlcd1      | 16  | 1.629161926 | 1.424705528 | -0.204456398 | 0.98109058 | 0.993891829 |
| Tnks       | 50  | 1.269821628 | 1.09229685  | -0.177524778 | 0.98124304 | 0.993931249 |
| Mcm5       | 29  | 1.440246388 | 1.106525481 | -0.333720907 | 0.98126496 | 0.993931249 |
| Cox7a2     | 52  | 1.143814747 | 1.064517799 | -0.079296948 | 0.98141752 | 0.994017163 |
| Mrps31     | 17  | 2.57334775  | 1.960004877 | -0.613342873 | 0.98202692 | 0.9944425   |
| Ppil2      | 10  | 0.57679016  | 0.540540541 | -0.036249619 | 0.98206663 | 0.9944425   |
| Rev1       | 149 | 1.202778842 | 1.111752952 | -0.09102589  | 0.98210854 | 0.9944425   |
| Psm8       | 29  | 1.020280698 | 1.125242485 | 0.104961787  | 0.98195223 | 0.9944425   |
| Gjd3       | 27  | 27.00010686 | 27.5365279  | 0.536421037  | 0.98246381 | 0.994596342 |
| Snapin     | 37  | 1.023883222 | 1.117362628 | 0.093479406  | 0.98244307 | 0.994596342 |
| Spcs1      | 49  | 1.623566148 | 1.003515788 | -0.620050359 | 0.98244155 | 0.994596342 |
| Tnfrsf23   | 4   | 1.298701299 | 0.560334003 | -0.738367296 | 0.98298379 | 0.994854728 |
| Zbtb14     | 151 | 1.108265143 | 1.053184616 | -0.055080527 | 0.98282007 | 0.994854728 |
| Wdr5       | 33  | 1.002457685 | 0.860759193 | -0.141698492 | 0.98287647 | 0.994854728 |
| Uxs1       | 42  | 1.360364916 | 1.553407841 | 0.193042925  | 0.98299023 | 0.994854728 |
| Zdhhc23    | 64  | 2.467151849 | 2.237030828 | -0.23012102  | 0.98336967 | 0.995130839 |
| Zdhhc13    | 50  | 1.391991388 | 1.221719462 | -0.170271926 | 0.98339868 | 0.995130839 |
| Tmem51     | 24  | 2.215057217 | 2.247626926 | 0.032569709  | 0.98361786 | 0.995283993 |
| Rps6kc1    | 31  | 1.285204609 | 1.196065918 | -0.089138692 | 0.98378443 | 0.9953839   |
| Spast      | 60  | 1.296000695 | 1.155468255 | -0.14053244  | 0.9838852  | 0.995417226 |
| Y16Ert472  | 65  | 0.880793484 | 0.861563212 | -0.019230272 | 0.98402119 | 0.995486168 |
| Tanc1      | 67  | 1.673805483 | 1.619838468 | -0.053967014 | 0.98422756 | 0.995557674 |
| Arpc1b     | 37  | 1.654839307 | 1.531674129 | -0.123165178 | 0.98418626 | 0.995557674 |
| Ice1       | 51  | 1.264001079 | 1.202115312 | -0.061885768 | 0.98433242 | 0.995595113 |
| Ctdspl2    | 24  | 0.987262994 | 1.012847125 | 0.025584132  | 0.98440842 | 0.995603364 |
| Brk1       | 41  | 1.137704627 | 1.184963718 | 0.047259091  | 0.98480244 | 0.995933223 |
| Nsun4      | 11  | 1.384205862 | 0.83832176  | -0.545884102 | 0.98487727 | 0.995940259 |

|           |     |             |             |              |            |             |
|-----------|-----|-------------|-------------|--------------|------------|-------------|
| H2-D1     | 12  | 1.56574889  | 1.69688546  | 0.13113657   | 0.98508682 | 0.996083515 |
| Mrpl13    | 10  | 0.929396151 | 0.79154653  | -0.137849621 | 0.98543621 | 0.996230861 |
| Tpi1      | 10  | 2.445513913 | 2.124158723 | -0.321355191 | 0.98538049 | 0.996230861 |
| Lamtor2   | 20  | 1.336477468 | 1.332486913 | -0.003990555 | 0.9853432  | 0.996230861 |
| Mlf2      | 68  | 1.475812506 | 1.546616044 | 0.070803538  | 0.98597915 | 0.996253485 |
| Rpusd4    | 12  | 1.432727928 | 1.00987561  | -0.422852318 | 0.98583454 | 0.996253485 |
| Ranbp3    | 37  | 1.888695953 | 1.999429552 | 0.110733599  | 0.9858942  | 0.996253485 |
| Ak2       | 18  | 1.715226443 | 1.334664924 | -0.380561519 | 0.98601893 | 0.996253485 |
| Anapc4    | 23  | 1.376309981 | 1.47338628  | 0.097076299  | 0.98584328 | 0.996253485 |
| Rps23     | 30  | 1.095609363 | 1.199497186 | 0.103887822  | 0.98573215 | 0.996253485 |
| Med11     | 18  | 0.750535621 | 0.793527419 | 0.042991798  | 0.98606962 | 0.996253485 |
| Nol9      | 66  | 1.118027228 | 0.996442331 | -0.121584897 | 0.98567661 | 0.996253485 |
| Ddrk1     | 7   | 2.244478693 | 1.575451342 | -0.669027351 | 0.98592454 | 0.996253485 |
| Hnrnpdl   | 149 | 0.977671969 | 0.939773899 | -0.03789807  | 0.98614286 | 0.99625889  |
| Nr1d1     | 8   | 1.899007559 | 2.183560708 | 0.284553149  | 0.98637708 | 0.996313465 |
| Rfk       | 59  | 1.021141554 | 0.992666242 | -0.028475312 | 0.98640057 | 0.996313465 |
| Fubp1     | 20  | 0.504419815 | 0.623174448 | 0.118754633  | 0.98630218 | 0.996313465 |
| Tshz1     | 10  | 1.906676326 | 1.509953479 | -0.396722847 | 0.98656749 | 0.996413472 |
| Pdcd6     | 5   | 0.208333333 | 0.224719101 | 0.016385768  | 0.98681476 | 0.996594613 |
| Cdh24     | 58  | 1.567495763 | 1.651945932 | 0.084450169  | 0.98717883 | 0.996893689 |
| Itsn1     | 87  | 1.052861075 | 0.948663263 | -0.104197812 | 0.9875096  | 0.99695328  |
| Ankfy1    | 31  | 1.544034858 | 1.849299558 | 0.3052647    | 0.98745356 | 0.99695328  |
| Csde1     | 44  | 1.520269128 | 1.652389911 | 0.132120782  | 0.98743461 | 0.99695328  |
| Rest      | 83  | 3.90181959  | 3.806793365 | -0.095026225 | 0.98749896 | 0.99695328  |
| Trerf1    | 18  | 10.33928967 | 10.55044631 | 0.211156641  | 0.98760882 | 0.996984854 |
| Tk2       | 21  | 1.787965981 | 1.564869563 | -0.223096419 | 0.98974325 | 0.99716295  |
| Sil1      | 25  | 1.458882947 | 1.389690365 | -0.069192582 | 0.989119   | 0.99716295  |
| Ttc39aos1 | 13  | 1.786191478 | 2.041046004 | 0.254854526  | 0.98858566 | 0.99716295  |
| Mthfd1    | 50  | 2.50808387  | 2.602044997 | 0.093961127  | 0.98790145 | 0.99716295  |
| Bend3     | 95  | 0.919697736 | 0.942826094 | 0.023128359  | 0.98898917 | 0.99716295  |
| Zcchc7    | 36  | 1.267450323 | 1.375919545 | 0.108469223  | 0.98946174 | 0.99716295  |
| Cdca4     | 73  | 1.330546844 | 1.029916577 | -0.300630267 | 0.98842882 | 0.99716295  |
| Hnf4a     | 6   | 92.30537729 | 92.94815891 | 0.642781621  | 0.98914577 | 0.99716295  |
| Ube2q1    | 58  | 1.475703552 | 1.502627113 | 0.026923561  | 0.98932183 | 0.99716295  |

|            |     |             |             |              |            |             |
|------------|-----|-------------|-------------|--------------|------------|-------------|
| Gm11346    | 2   | 88.63636364 | 88.54540359 | -0.090960049 | 0.98945483 | 0.99716295  |
| Ccdc101    | 24  | 1.377693163 | 1.326383508 | -0.051309655 | 0.98813589 | 0.99716295  |
| Noc2l      | 77  | 1.081843831 | 1.028670194 | -0.053173638 | 0.98929107 | 0.99716295  |
| Nkain2     | 15  | 2.529375962 | 2.337264052 | -0.192111911 | 0.98954796 | 0.99716295  |
| Optn       | 23  | 1.114394277 | 1.384789117 | 0.27039484   | 0.98852577 | 0.99716295  |
| Sapcd2     | 6   | 13.78590892 | 15.34404811 | 1.558139188  | 0.98901351 | 0.99716295  |
| Ccdc97     | 7   | 2.388898109 | 1.784868906 | -0.604029203 | 0.98809903 | 0.99716295  |
| i30013C23F | 30  | 2.212250989 | 2.192210789 | -0.020040199 | 0.98930172 | 0.99716295  |
| Rnf31      | 56  | 1.538080281 | 1.782428222 | 0.244347941  | 0.98920849 | 0.99716295  |
| Exosc10    | 37  | 1.091740174 | 1.098694034 | 0.00695386   | 0.98915501 | 0.99716295  |
| Morn1      | 29  | 1.084458763 | 1.110955566 | 0.026496803  | 0.98895266 | 0.99716295  |
| Smg8       | 9   | 1.206570975 | 0.930839629 | -0.275731346 | 0.98882373 | 0.99716295  |
| Pex16      | 17  | 2.153470424 | 1.974443562 | -0.179026862 | 0.98966983 | 0.99716295  |
| Dera       | 16  | 1.081151766 | 0.943569008 | -0.137582758 | 0.98962343 | 0.99716295  |
| Hist1h1c   | 11  | 0.885054682 | 1.016762077 | 0.131707395  | 0.98979108 | 0.99716295  |
| Gm5105     | 6   | 96.75981444 | 97.03598719 | 0.276172748  | 0.98853196 | 0.99716295  |
| Adprm      | 12  | 1.333952942 | 1.54360267  | 0.209649728  | 0.98806034 | 0.99716295  |
| Patz1      | 69  | 1.078107712 | 1.129692462 | 0.051584751  | 0.9891548  | 0.99716295  |
| i00015O10F | 1   | 96.03174603 | 96          | -0.031746032 | 0.98974148 | 0.99716295  |
| Pdzd7      | 7   | 61.62217845 | 61.59386197 | -0.028316486 | 0.98831863 | 0.99716295  |
| Prune      | 11  | 1.261663015 | 1.644909031 | 0.383246016  | 0.98982387 | 0.99716295  |
| Commd10    | 25  | 1.127386312 | 1.076043119 | -0.051343193 | 0.98994126 | 0.997212742 |
| Mre11a     | 16  | 1.229204406 | 1.229903216 | 0.000698809  | 0.99002192 | 0.997225542 |
| Ing3       | 36  | 1.189650978 | 1.301571498 | 0.11192052   | 0.99010801 | 0.997243801 |
| Rbm25      | 20  | 1.027111727 | 0.801611107 | -0.22550062  | 0.9901929  | 0.997260847 |
| Eftud2     | 36  | 1.315419319 | 1.058650373 | -0.256768946 | 0.99043421 | 0.997354771 |
| Fam98b     | 12  | 0.367835144 | 0.407524892 | 0.039689748  | 0.99049006 | 0.997354771 |
| )10107E04F | 35  | 1.398853412 | 1.603266492 | 0.204413079  | 0.99046251 | 0.997354771 |
| Ilf2       | 14  | 1.57826027  | 1.834704584 | 0.256444314  | 0.99074665 | 0.997544693 |
| Acvr1b     | 110 | 1.294812067 | 1.245772455 | -0.049039612 | 0.9912687  | 0.997828053 |
| i33405D12F | 30  | 1.205022573 | 1.468010662 | 0.262988089  | 0.9912258  | 0.997828053 |
| Cggbp1     | 88  | 1.363230809 | 1.398338826 | 0.035108017  | 0.99130008 | 0.997828053 |
| Tada1      | 41  | 1.239850395 | 1.195146396 | -0.044703999 | 0.9912786  | 0.997828053 |
| Malat1     | 16  | 0.875184549 | 0.919938478 | 0.04475393   | 0.99223404 | 0.997975325 |

|            |     |             |             |              |            |             |
|------------|-----|-------------|-------------|--------------|------------|-------------|
| Zyg11b     | 37  | 1.743853848 | 1.884182625 | 0.140328776  | 0.99174459 | 0.997975325 |
| Riok2      | 16  | 1.548814322 | 1.223704424 | -0.325109898 | 0.99199559 | 0.997975325 |
| Klhl4      | 3   | 43.04809323 | 43.59466489 | 0.546571666  | 0.99176692 | 0.997975325 |
| Aven       | 107 | 1.522277683 | 1.420247274 | -0.102030409 | 0.99223287 | 0.997975325 |
| Mcm6       | 39  | 1.209048251 | 1.304879455 | 0.095831204  | 0.99182567 | 0.997975325 |
| Rngtt      | 54  | 2.085434729 | 1.884533702 | -0.200901027 | 0.9922625  | 0.997975325 |
| Ppp1r3e    | 35  | 1.247766552 | 1.065953118 | -0.181813434 | 0.99207082 | 0.997975325 |
| Bag2       | 55  | 1.286719334 | 1.163324982 | -0.123394353 | 0.99174059 | 0.997975325 |
| Gga2       | 14  | 1.628312256 | 1.419787728 | -0.208524528 | 0.99189559 | 0.997975325 |
| Pipox      | 2   | 8.600697472 | 8.65248227  | 0.051784798  | 0.99205658 | 0.997975325 |
| Arid3a     | 87  | 1.800685396 | 1.598427153 | -0.202258243 | 0.99204885 | 0.997975325 |
| Agap3      | 119 | 1.408469068 | 1.124353489 | -0.284115579 | 0.99240891 | 0.998054169 |
| Ywhaq      | 56  | 1.119863514 | 1.11920255  | -0.000660963 | 0.99248899 | 0.998066299 |
| Cuedc1     | 99  | 19.29084877 | 19.08558986 | -0.205258908 | 0.99266008 | 0.998135542 |
| Vwa8       | 52  | 1.765879152 | 1.661089409 | -0.104789742 | 0.99269389 | 0.998135542 |
| Hdac6      | 12  | 20.55590766 | 21.64699178 | 1.091084118  | 0.99299066 | 0.998365536 |
| Nt5m       | 81  | 1.286744756 | 1.209775023 | -0.076969733 | 0.99311596 | 0.998423098 |
| Selo       | 73  | 1.115183893 | 0.961572293 | -0.153611599 | 0.99343555 | 0.998675976 |
| Zfp692     | 18  | 1.104904724 | 0.994889298 | -0.110015425 | 0.99370795 | 0.998695128 |
| Fdx1       | 49  | 0.838939138 | 1.124997157 | 0.286058019  | 0.9936244  | 0.998695128 |
| Hinfp      | 25  | 1.392430558 | 1.452456195 | 0.060025637  | 0.99363035 | 0.998695128 |
| Hmga2-ps1  | 8   | 1.124935319 | 1.420369008 | 0.295433689  | 0.99372683 | 0.998695128 |
| Tmem238    | 91  | 1.176571415 | 1.064754166 | -0.111817249 | 0.99385416 | 0.998707191 |
| Thap3      | 35  | 1.656902405 | 1.278970042 | -0.377932363 | 0.99397695 | 0.998707191 |
| Fads1      | 61  | 1.142541559 | 1.083672148 | -0.058869411 | 0.99401108 | 0.998707191 |
| Mecr       | 47  | 1.78619515  | 1.716831495 | -0.069363655 | 0.99395049 | 0.998707191 |
| !10406O10F | 22  | 1.260239915 | 1.262601221 | 0.002361306  | 0.99473989 | 0.999029027 |
| H2-M3      | 13  | 3.073495932 | 3.369231532 | 0.2957356    | 0.99468649 | 0.999029027 |
| Tmem55b    | 68  | 1.148450629 | 1.096768623 | -0.051682006 | 0.99462102 | 0.999029027 |
| Nupl2      | 23  | 1.209897622 | 1.129884029 | -0.080013593 | 0.99442731 | 0.999029027 |
| Dnajb14    | 85  | 1.13648463  | 1.078819419 | -0.05766521  | 0.99447412 | 0.999029027 |
| Rara       | 130 | 2.377144262 | 2.304159653 | -0.072984609 | 0.99472878 | 0.999029027 |
| Thumpd2    | 43  | 1.591100773 | 1.466168767 | -0.124932007 | 0.99503616 | 0.999094598 |
| i32428C04F | 46  | 1.529008965 | 1.530399044 | 0.001390079  | 0.99507752 | 0.999094598 |

|           |     |             |             |              |            |             |
|-----------|-----|-------------|-------------|--------------|------------|-------------|
| Cenpu     | 38  | 1.8653075   | 1.672771749 | -0.19253575  | 0.99493005 | 0.999094598 |
| Vps25     | 17  | 1.183002407 | 1.476480175 | 0.293477768  | 0.99503983 | 0.999094598 |
| Kcnc1     | 1   | 74.46808511 | 74.43609023 | -0.031994881 | 0.99515758 | 0.999106615 |
| Chst8     | 44  | 14.55302469 | 15.49061446 | 0.937589771  | 0.99549609 | 0.999241373 |
| Tcf3      | 60  | 0.93708361  | 0.871053565 | -0.066030045 | 0.99545659 | 0.999241373 |
| Slc39a6   | 55  | 0.826510074 | 0.85116894  | 0.024658867  | 0.99539109 | 0.999241373 |
| Scyl1     | 64  | 1.289078065 | 1.33089604  | 0.041817975  | 0.99577887 | 0.999251804 |
| Spryd4    | 10  | 1.078633779 | 1.346768771 | 0.268134992  | 0.9957467  | 0.999251804 |
| Nipsnap3a | 6   | 49.14734544 | 48.45370263 | -0.693642811 | 0.99569327 | 0.999251804 |
| Ctns      | 9   | 1.612649434 | 1.320012187 | -0.292637247 | 0.99563679 | 0.999251804 |
| Wdr3      | 29  | 1.102620337 | 1.033483803 | -0.069136534 | 0.99619013 | 0.999383116 |
| Rbm19     | 30  | 1.868383957 | 1.575652837 | -0.29273112  | 0.99609458 | 0.999383116 |
| Mrps10    | 15  | 1.078442003 | 0.955706487 | -0.122735516 | 0.99601035 | 0.999383116 |
| Nap1l4    | 73  | 1.024974746 | 0.963812252 | -0.061162494 | 0.99625025 | 0.999383116 |
| Stat5a    | 25  | 3.771423938 | 3.523306172 | -0.248117766 | 0.99624172 | 0.999383116 |
| Prepl     | 25  | 1.267082622 | 1.724875081 | 0.457792459  | 0.9966205  | 0.999481221 |
| Lcmt2     | 22  | 0.627446011 | 0.781223556 | 0.153777545  | 0.99661626 | 0.999481221 |
| Zfp407    | 92  | 1.630398937 | 1.525530033 | -0.104868904 | 0.9965755  | 0.999481221 |
| Mcm3      | 21  | 1.41209576  | 1.197363298 | -0.214732462 | 0.99643106 | 0.999481221 |
| Mex3b     | 97  | 1.36867078  | 1.307389436 | -0.061281344 | 0.99674511 | 0.999490877 |
| Sptlc1    | 57  | 3.448399076 | 2.877156777 | -0.571242299 | 0.99677888 | 0.999490877 |
| Nsmce2    | 9   | 0.947316954 | 0.836466489 | -0.110850465 | 0.99683447 | 0.999490877 |
| Elk3      | 25  | 1.116130174 | 1.050220389 | -0.065909785 | 0.99693558 | 0.999523962 |
| Ap4b1     | 19  | 1.014480834 | 1.066922854 | 0.052442019  | 0.99713475 | 0.999655343 |
| Rnf126    | 127 | 1.243461687 | 1.114806648 | -0.128655039 | 0.99727851 | 0.999665866 |
| Ssr3      | 13  | 0.682251975 | 0.500501772 | -0.181750203 | 0.99728149 | 0.999665866 |
| Vwa9      | 30  | 4.882518713 | 5.04479076  | 0.162272047  | 0.99738693 | 0.999703267 |
| Clasrp    | 49  | 1.493700325 | 1.172628469 | -0.321071856 | 0.99796594 | 0.99974687  |
| Ror1      | 39  | 1.290852725 | 1.026664782 | -0.264187943 | 0.99795495 | 0.99974687  |
| Trim7     | 13  | 12.47869261 | 12.83316999 | 0.354477378  | 0.99809129 | 0.99974687  |
| Dram2     | 51  | 1.304514468 | 1.085384934 | -0.219129535 | 0.9980425  | 0.99974687  |
| Pigc      | 28  | 1.587018902 | 1.698145527 | 0.111126625  | 0.99817987 | 0.99974687  |
| 10442N19F | 2   | 71.21710526 | 70.69642686 | -0.520678402 | 0.99776892 | 0.99974687  |
| Plekhb2   | 24  | 1.181887687 | 1.311761634 | 0.129873947  | 0.9977595  | 0.99974687  |

|           |    |             |             |              |            |             |
|-----------|----|-------------|-------------|--------------|------------|-------------|
| Mir5133   | 32 | 1.767029175 | 1.588494827 | -0.178534347 | 0.9981042  | 0.99974687  |
| Pja2      | 24 | 1.197043183 | 0.953103203 | -0.243939979 | 0.99817193 | 0.99974687  |
| Kcna7     | 28 | 7.254607865 | 8.215342154 | 0.960734288  | 0.99756899 | 0.99974687  |
| Slc35f5   | 53 | 1.737396164 | 1.645673286 | -0.091722878 | 0.99760965 | 0.99974687  |
| Ints6     | 77 | 1.20783524  | 1.022859296 | -0.184975944 | 0.99825684 | 0.999755727 |
| Szt2      | 6  | 1.120408926 | 1.032908203 | -0.087500722 | 0.9983267  | 0.999757456 |
| Cpt2      | 25 | 1.210412896 | 1.49729454  | 0.286881644  | 0.99851424 | 0.999877022 |
| C1rl      | 1  | 100         | 100         | 0            | 1          | 1           |
| Lrrc29    | 2  | 0           | 0           | 0            | 1          | 1           |
| Srcap     | 4  | 0           | 0           | 0            | 1          | 1           |
| Gm12238   | 1  | 100         | 100         | 0            | 1          | 1           |
| Spa17     | 2  | 0           | 0           | 0            | 1          | 1           |
| Zfp764    | 10 | 1.659327395 | 1.238120316 | -0.421207079 | 0.99905386 | 1           |
| Atp5a1    | 47 | 1.152277261 | 1.340889363 | 0.188612102  | 0.99881905 | 1           |
| Zfp663    | 1  | 100         | 100         | 0            | 1          | 1           |
| Mphosph8  | 21 | 0.84178989  | 1.069819084 | 0.228029194  | 0.99979389 | 1           |
| Kirrel    | 16 | 1.312351491 | 0.878079173 | -0.434272317 | 0.99900251 | 1           |
| Neu3      | 3  | 0           | 0           | 0            | 1          | 1           |
| Hist2h3c2 | 2  | 0           | 0           | 0            | 1          | 1           |
| Mir125b-1 | 1  | 0           | 0           | 0            | 1          | 1           |
| Trit1     | 4  | 0           | 0           | 0            | 1          | 1           |
| Pogz      | 37 | 1.021458177 | 0.81208787  | -0.209370306 | 0.99947011 | 1           |
| Aftph     | 63 | 0.954580169 | 0.972531806 | 0.017951636  | 0.99891783 | 1           |
| 10008N11F | 1  | 100         | 100         | 0            | 1          | 1           |
| Capg      | 4  | 0           | 0           | 0            | 1          | 1           |
| Cxxc1     | 65 | 1.161647237 | 1.043552621 | -0.118094617 | 0.99947288 | 1           |
| Mapre1    | 36 | 0.904330375 | 0.769735051 | -0.134595323 | 0.99919333 | 1           |
